# Supplementary material
Source: PubMed Central journal article supplement (PMC2735218)

# MS/MS Spectra for Supporting the Newly Identified GlycoProteins in FTC-133 Cell Line Based on One Glycopeptide Identification

LG3BP\_HUMAN

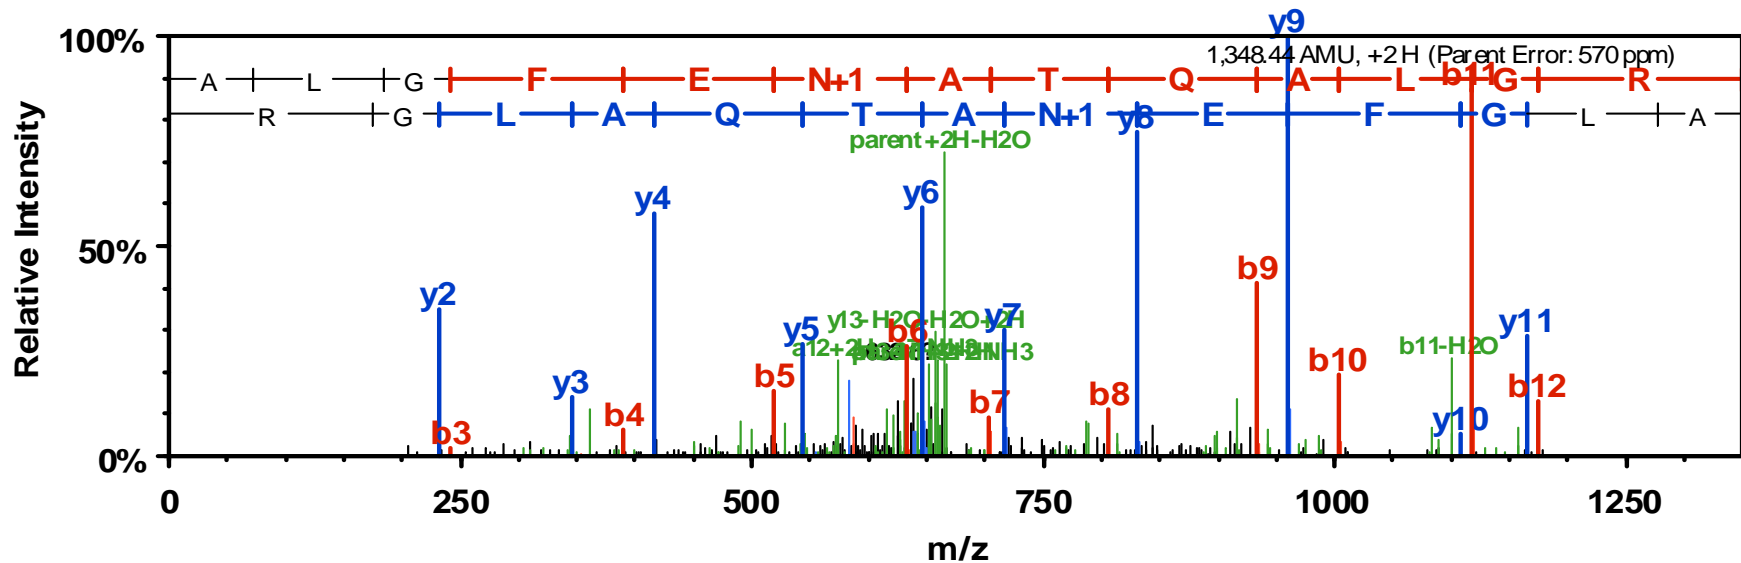

TIMP1\_HUMAN

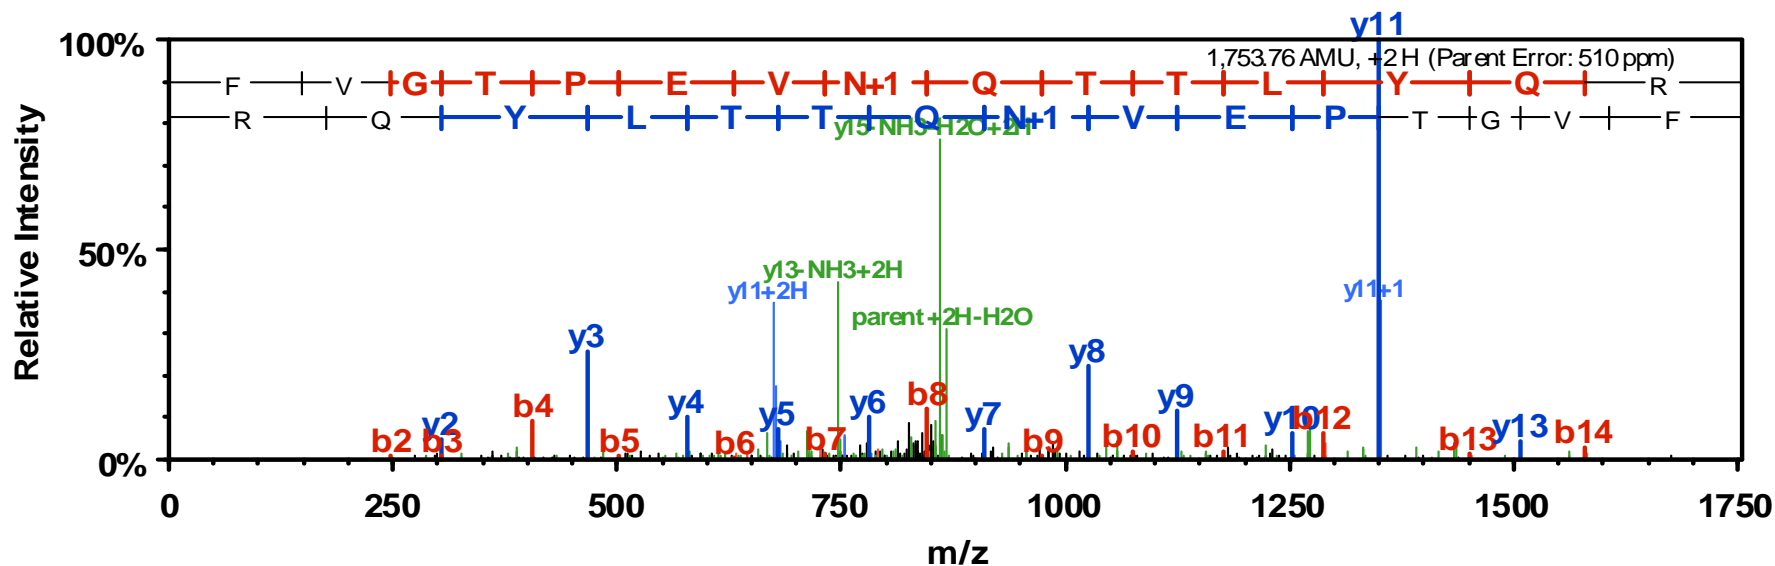

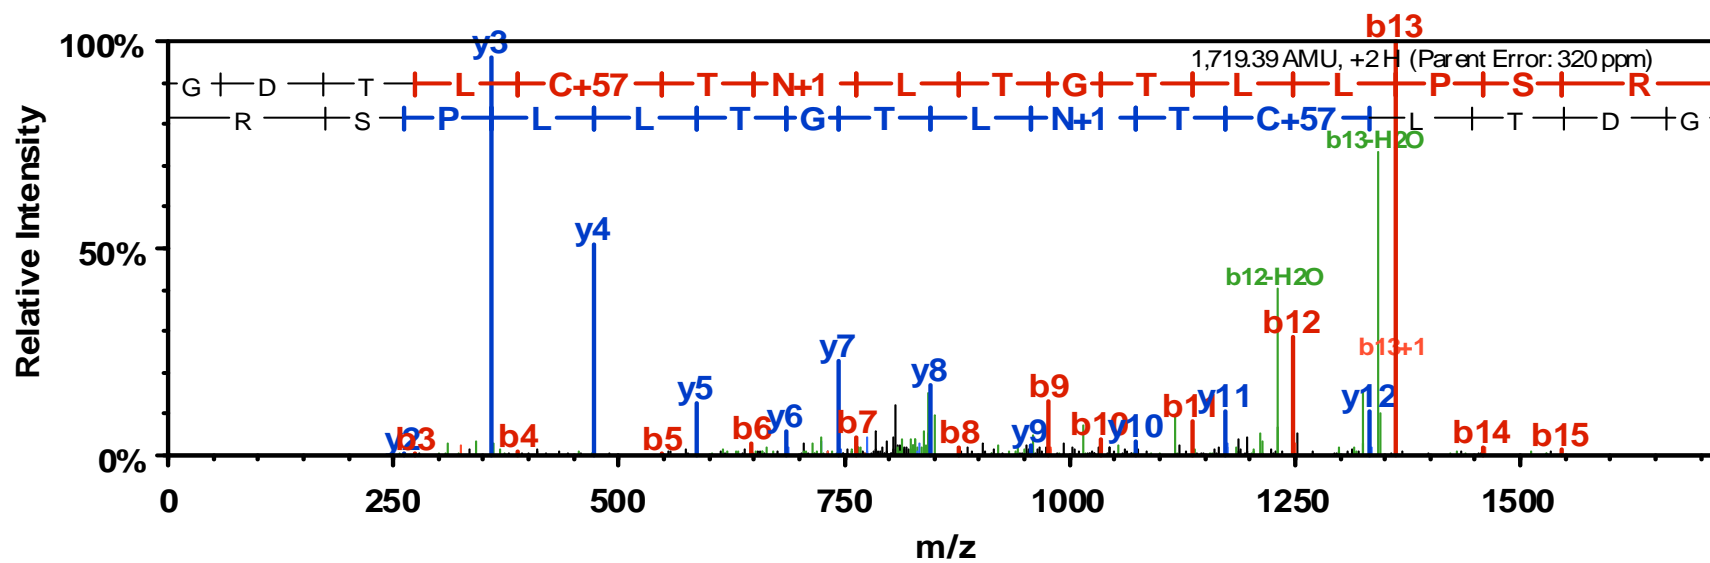

# MS/MS Spectra for Supporting the Newly Identified GlycoProteins in TPC-1 Cell Line Based on One Glycopeptide Identification

1B44\_HUMAN

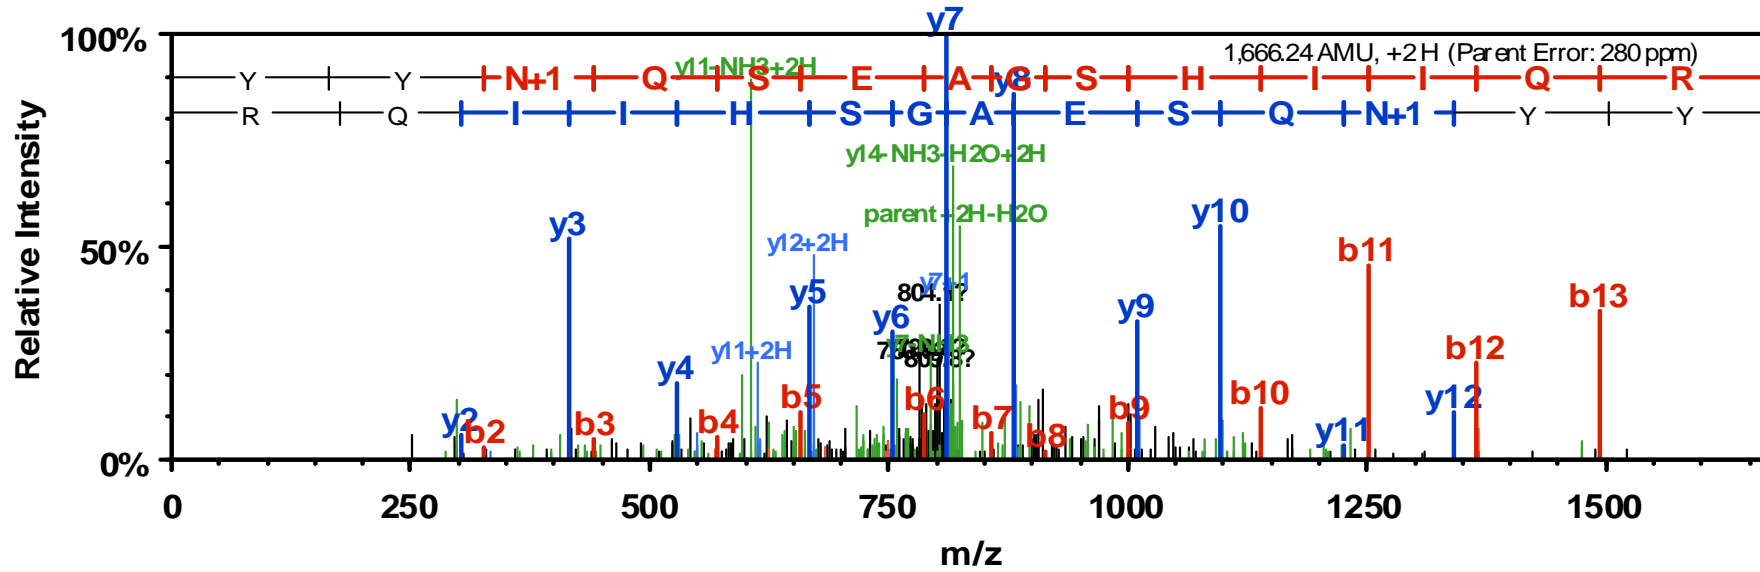

1C02\_HUMAN

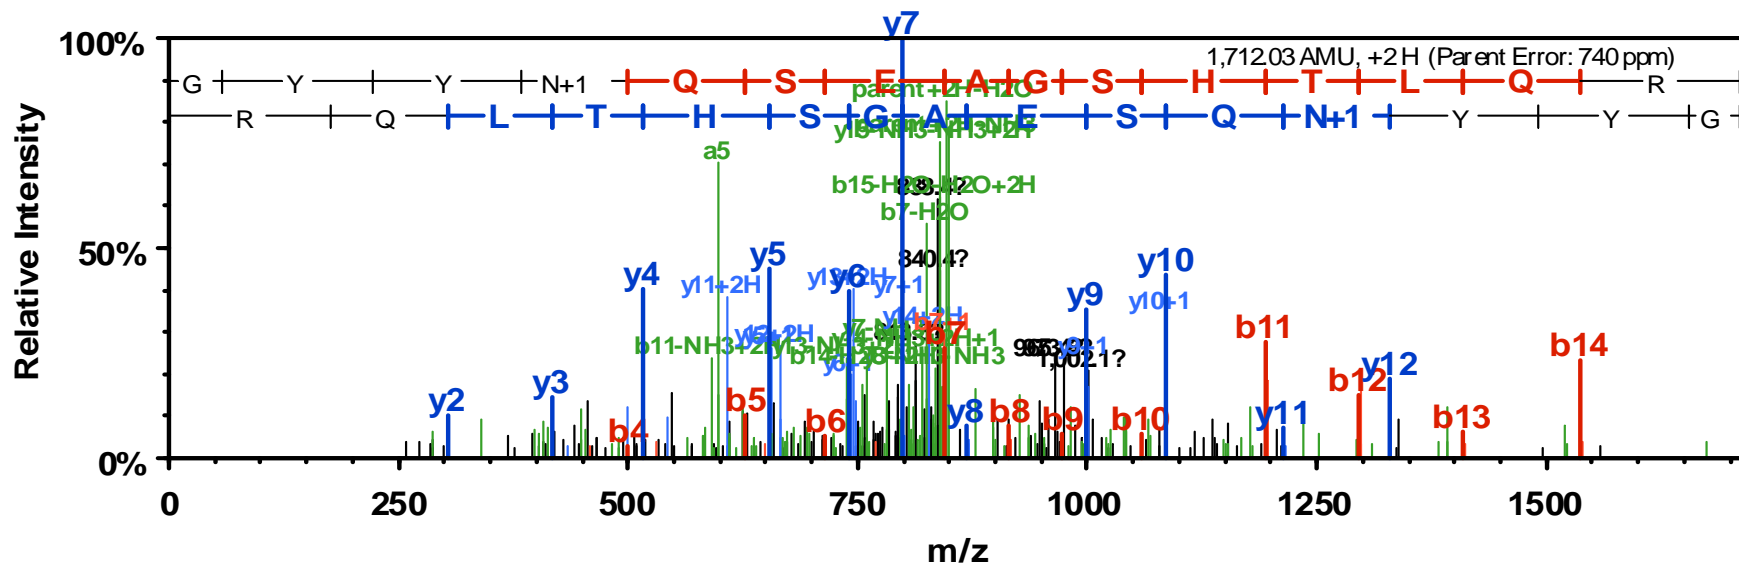

1C03\_HUMAN

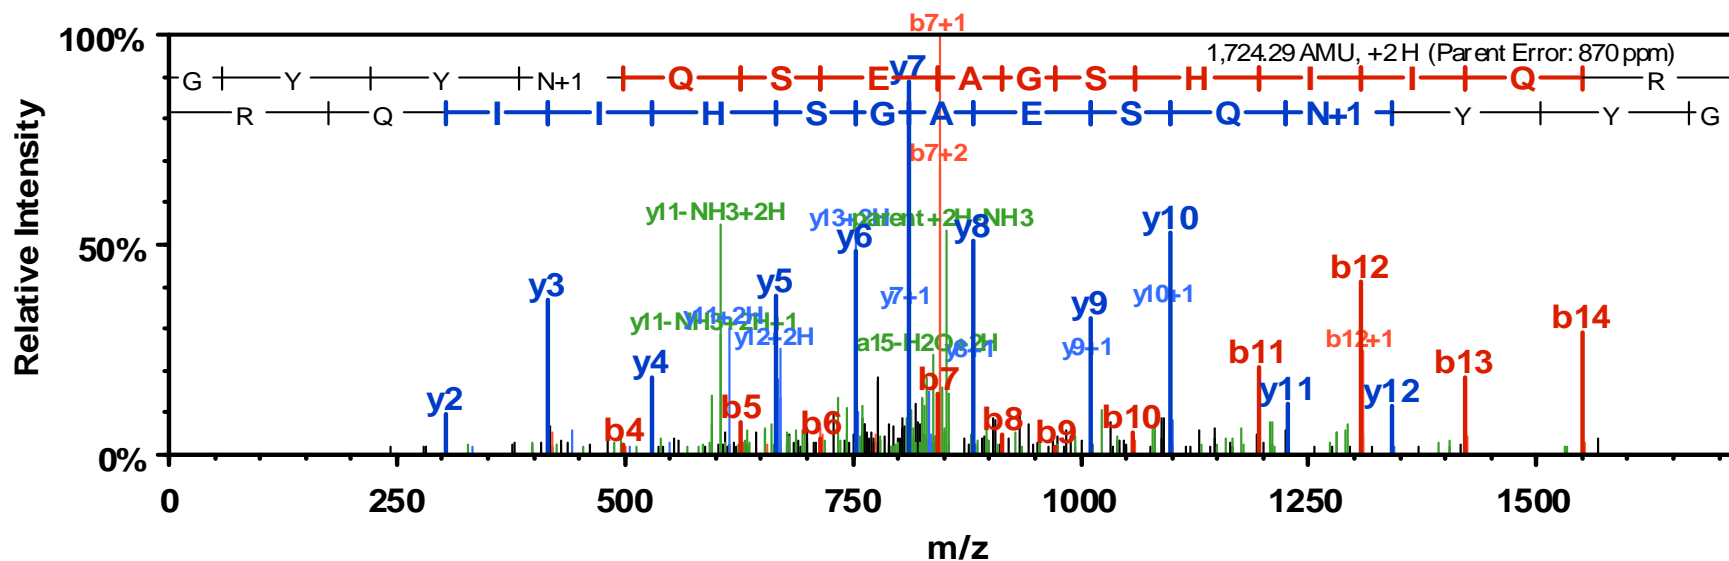

A1AT\_HUMAN

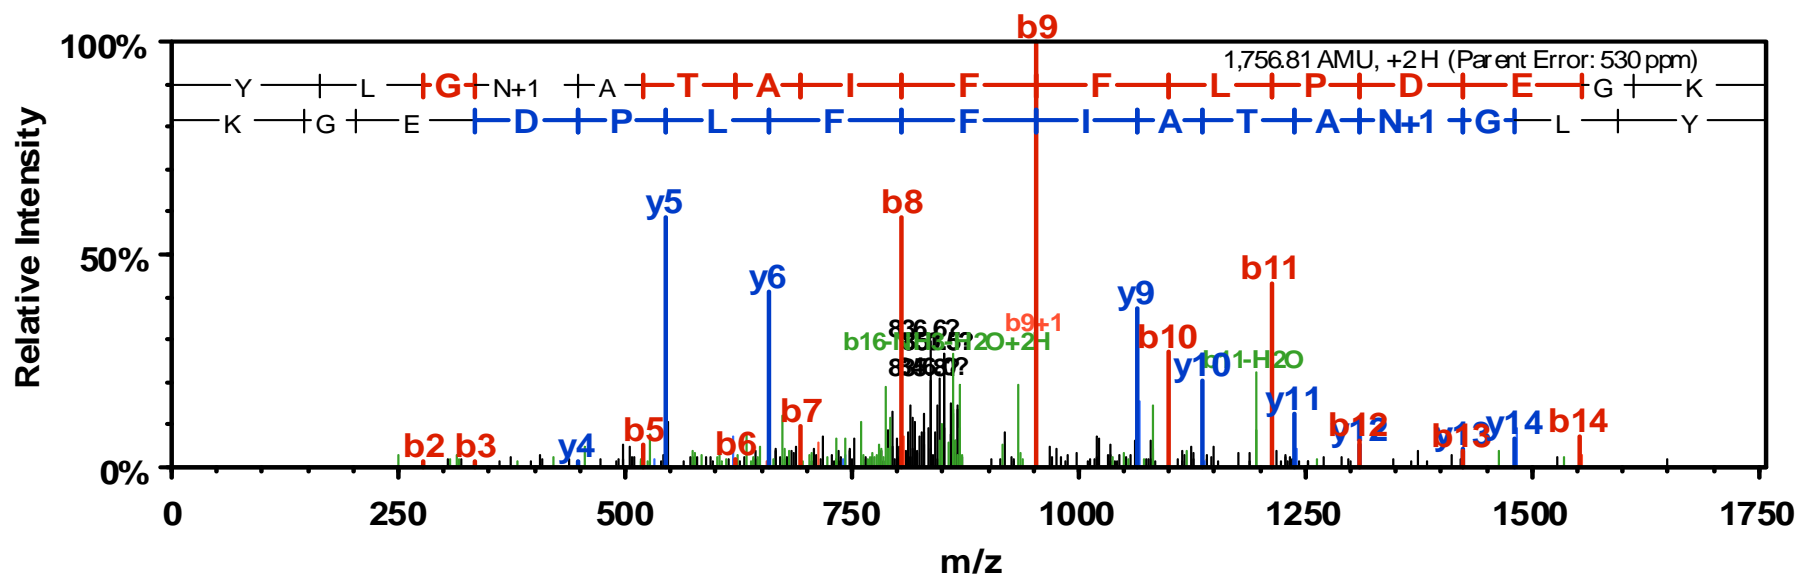

AT1B3\_HUMAN

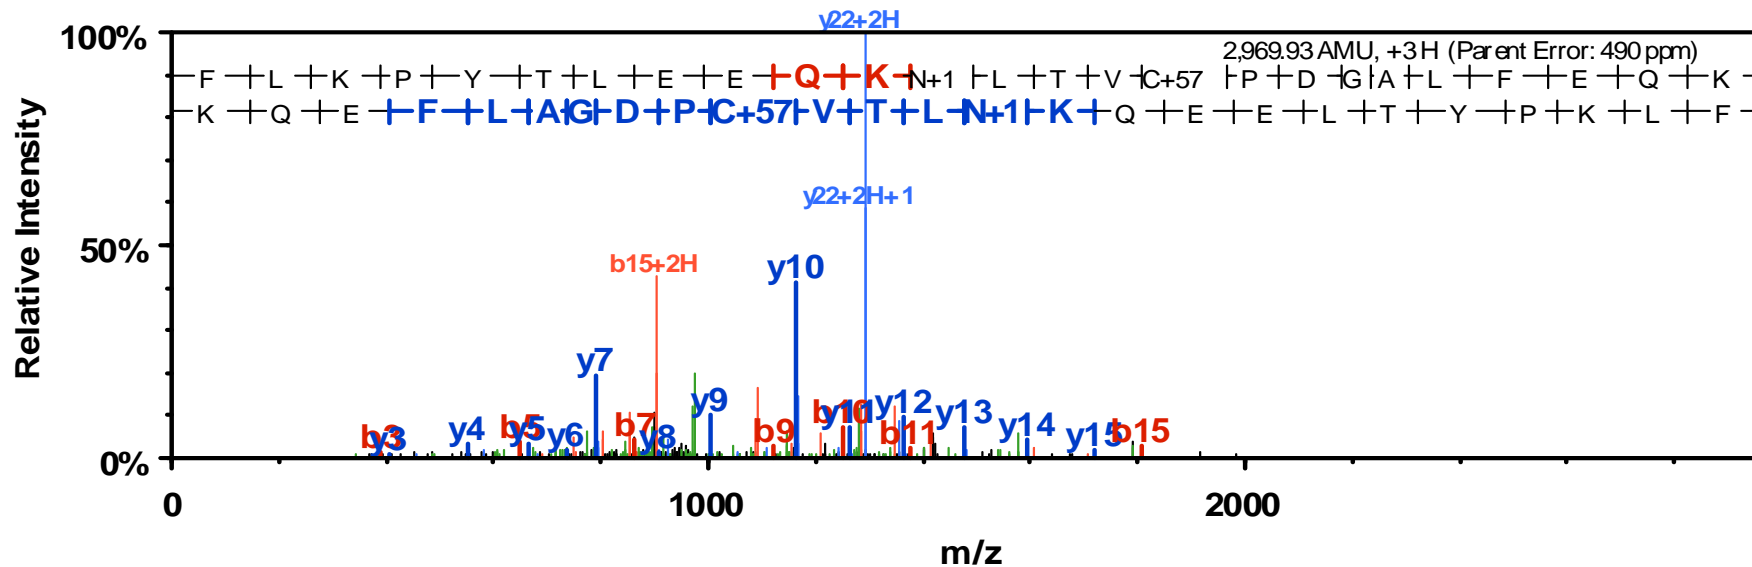

CBPE\_HUMAN

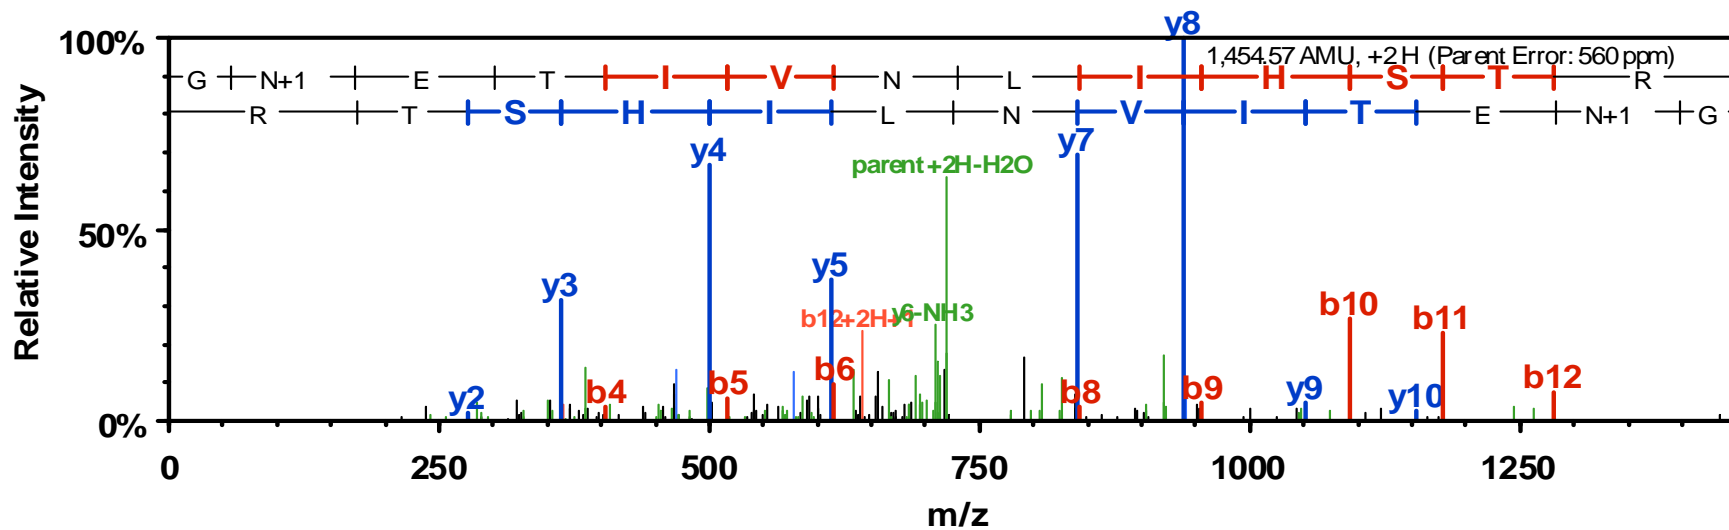



EDIL3\_HUMAN

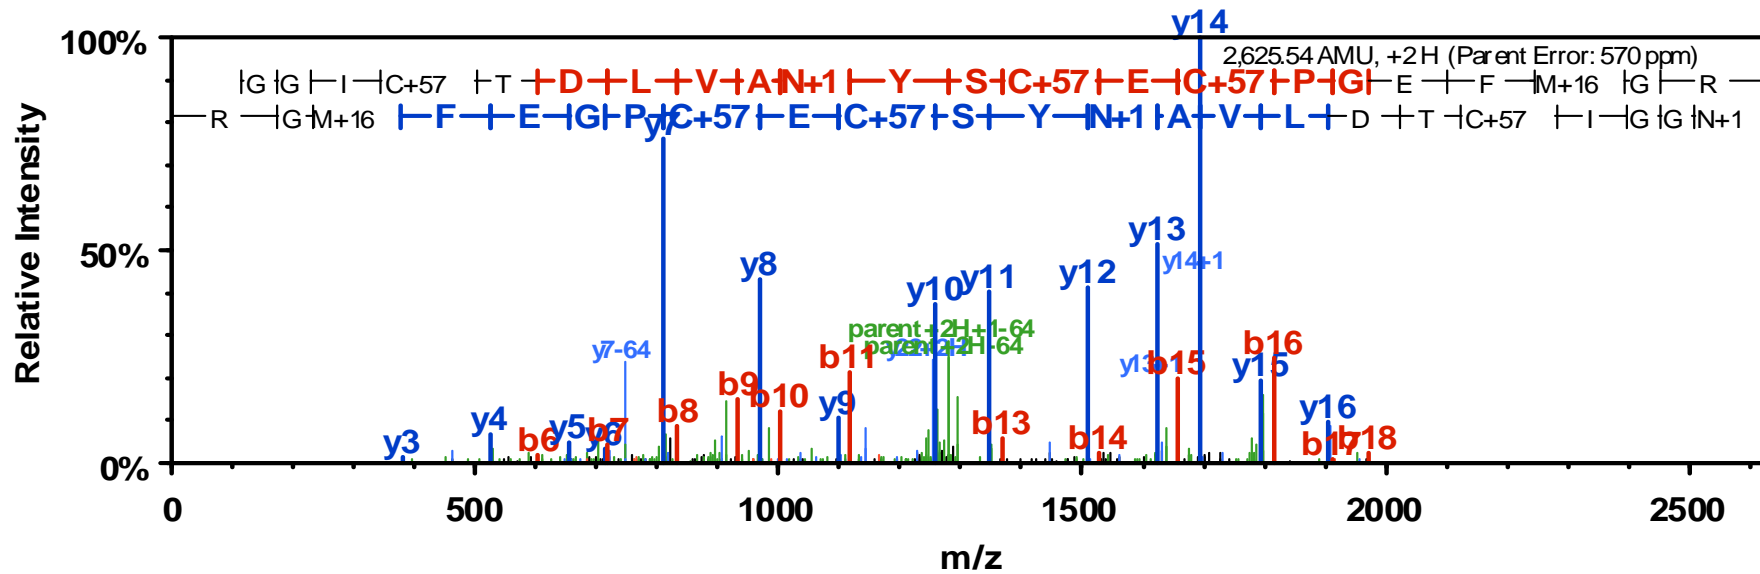

EFNA5\_HUMAN

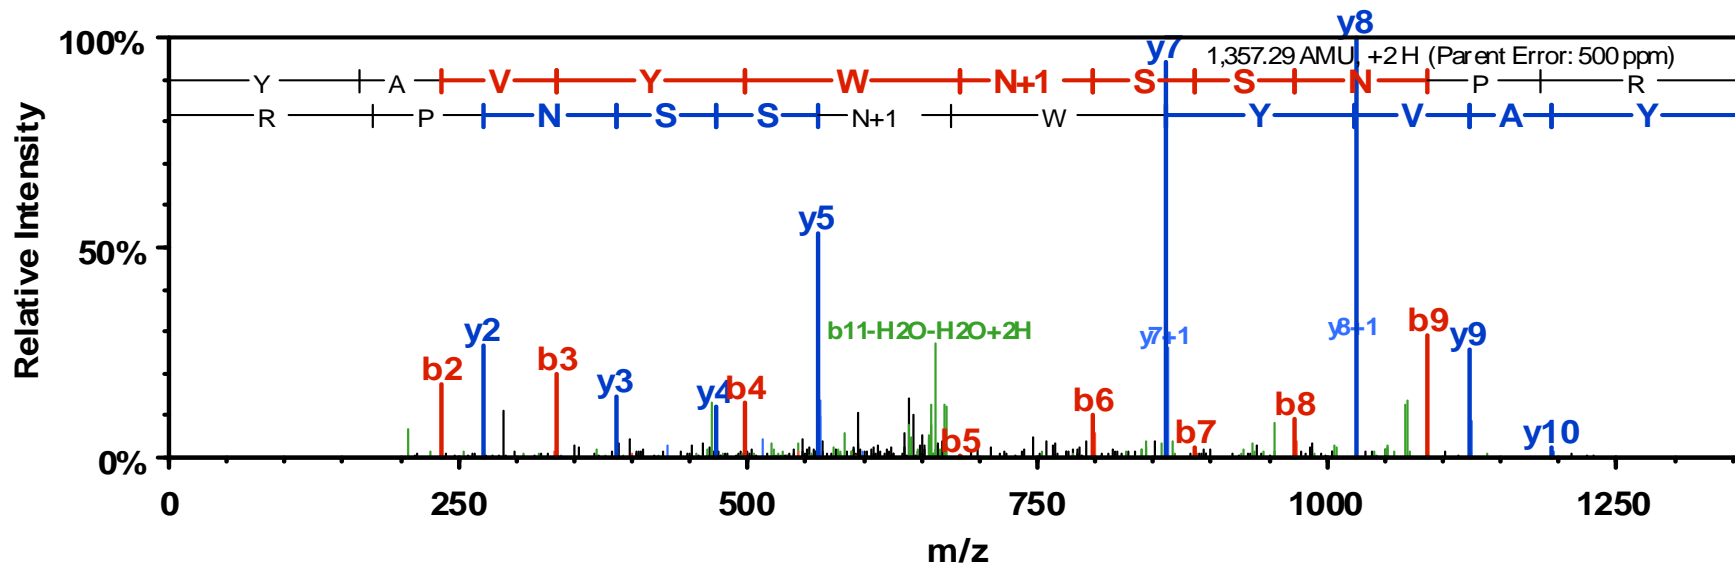

EMP3\_HUMAN

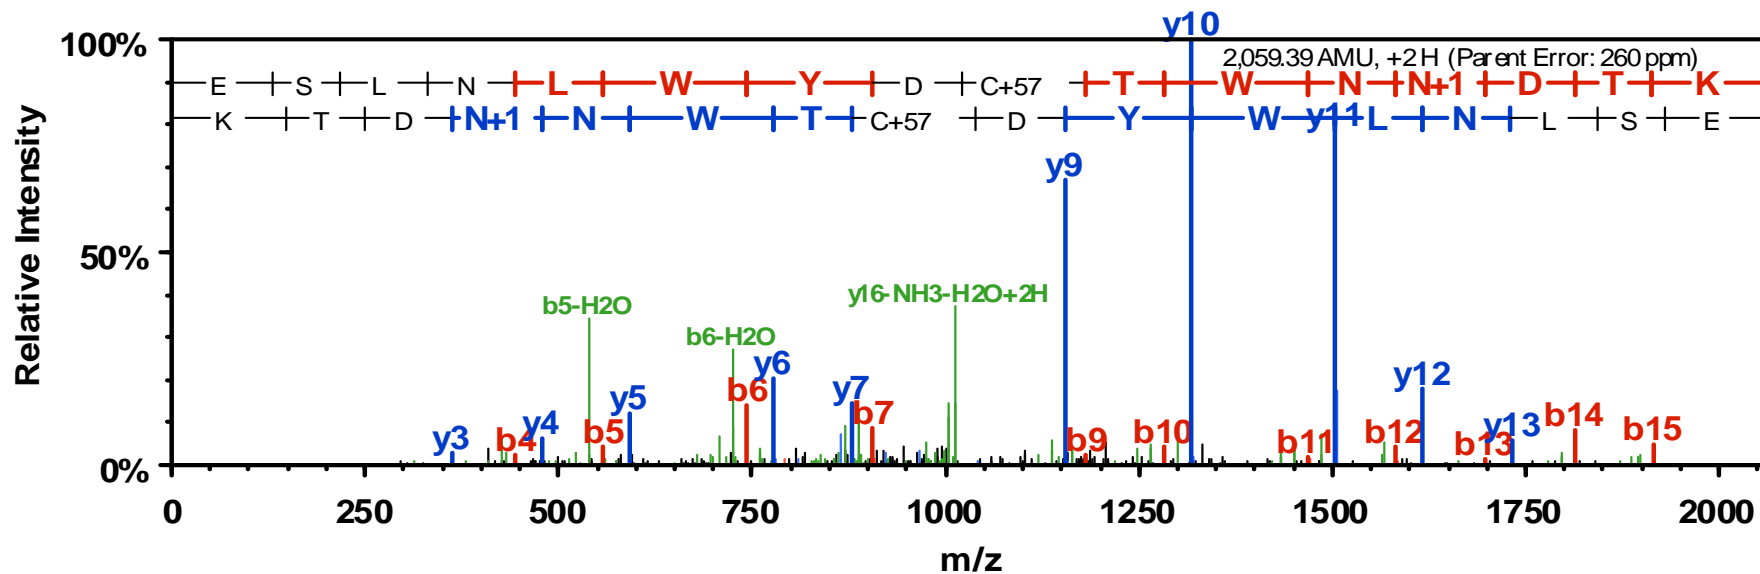

GGT1\_HUMAN

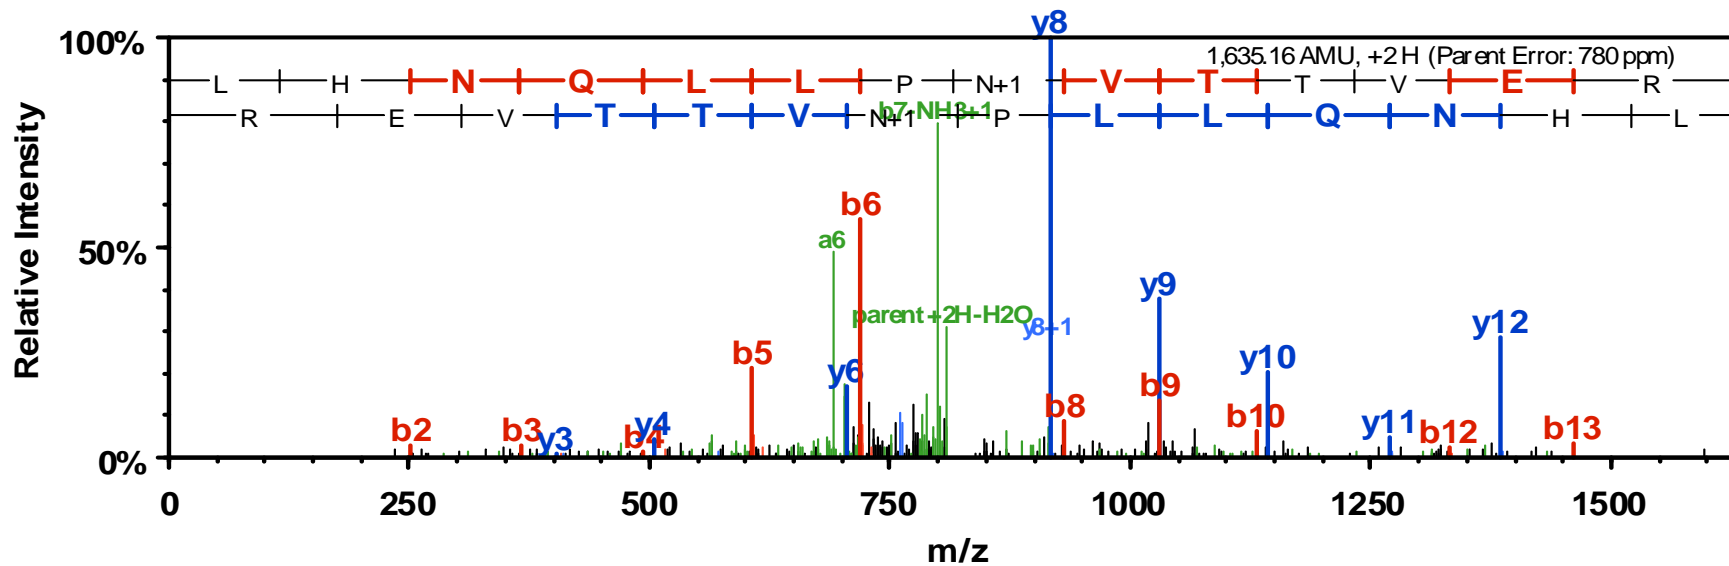



HEMO\_HUMAN

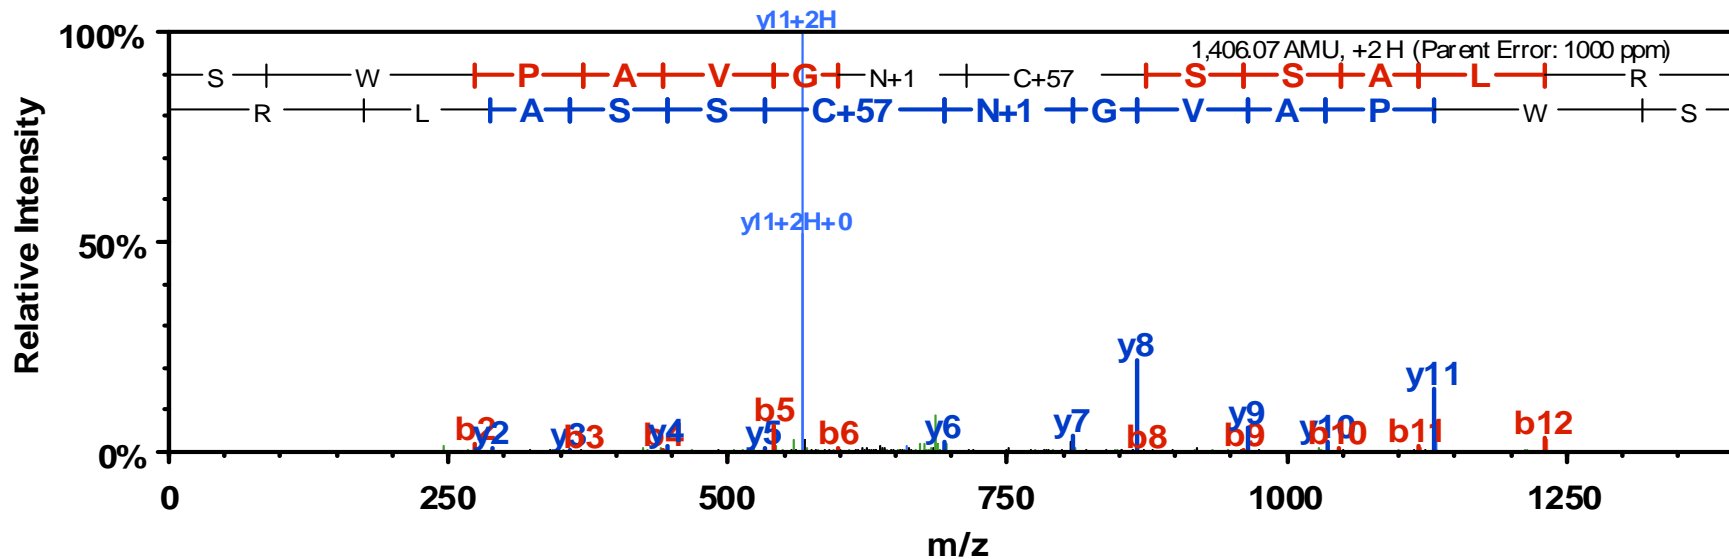

IBP3\_HUMAN

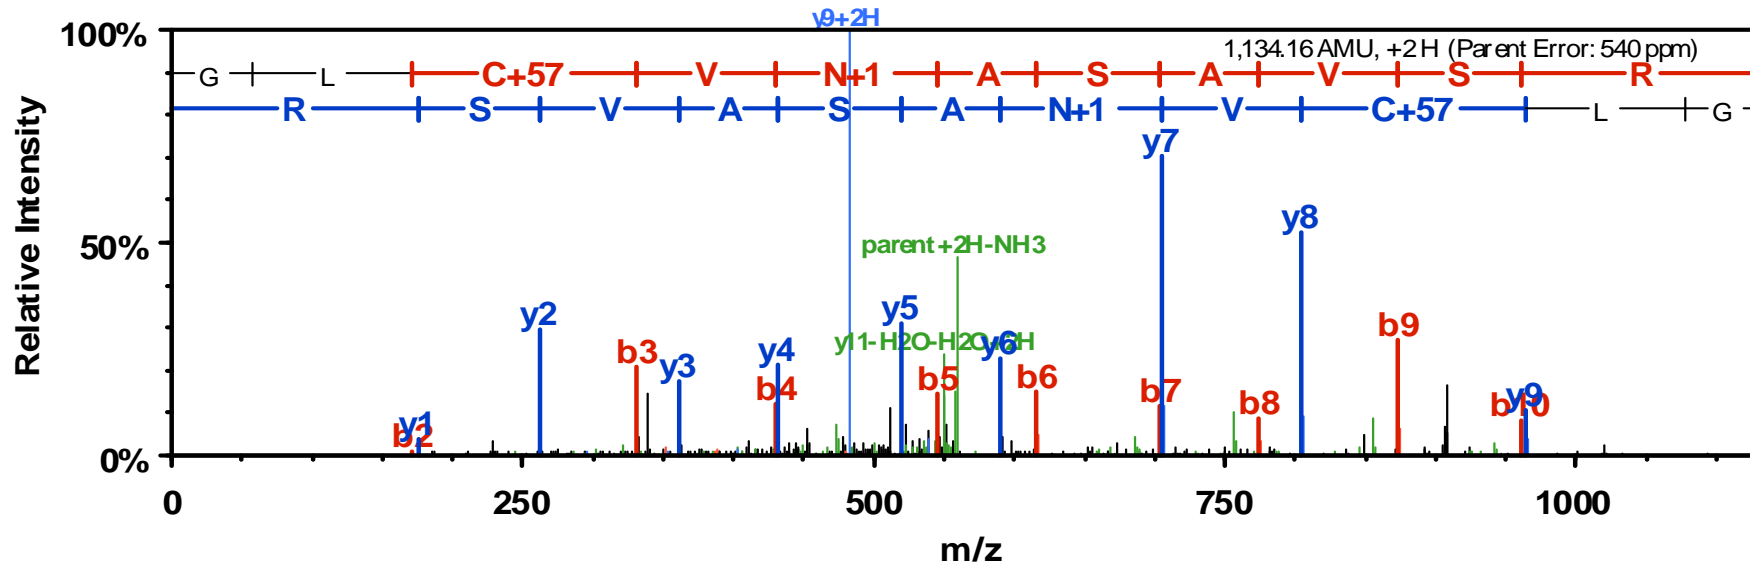

LOXL2\_HUMAN

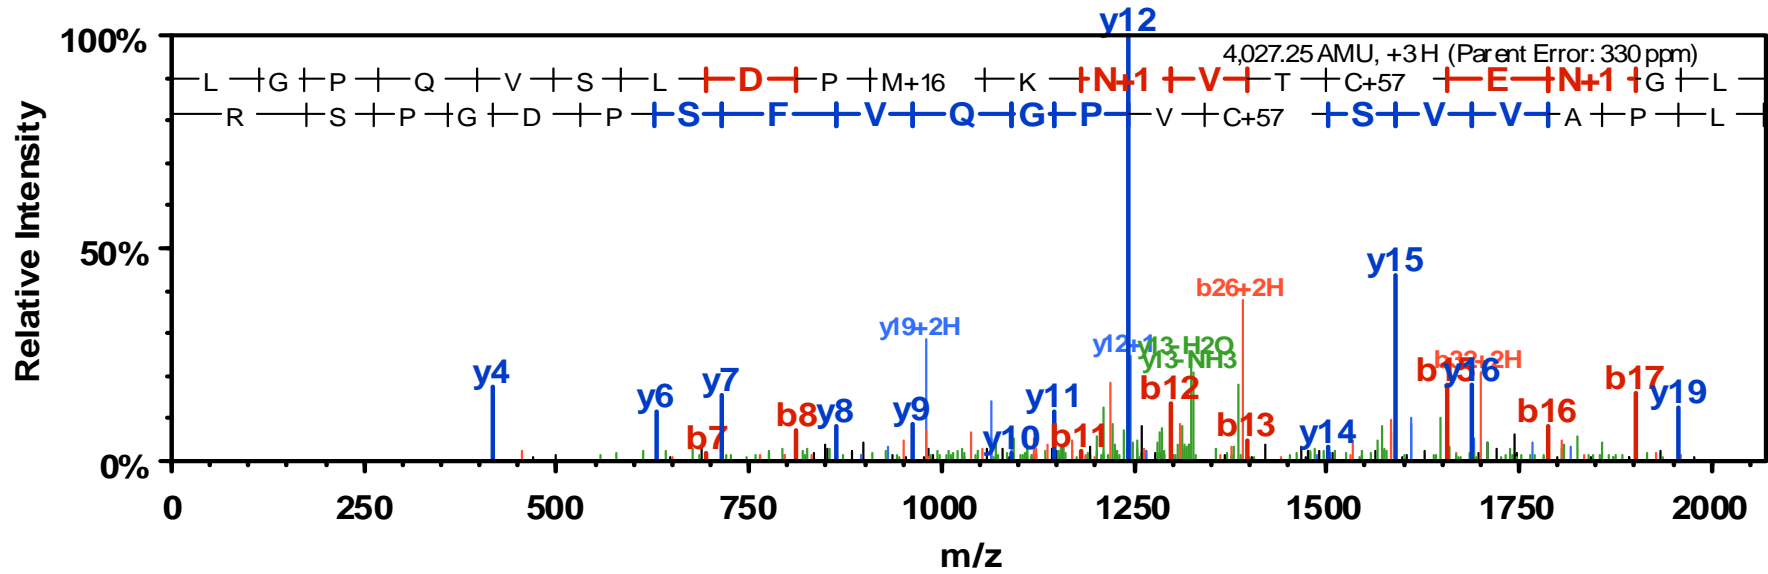

MCP\_HUMAN

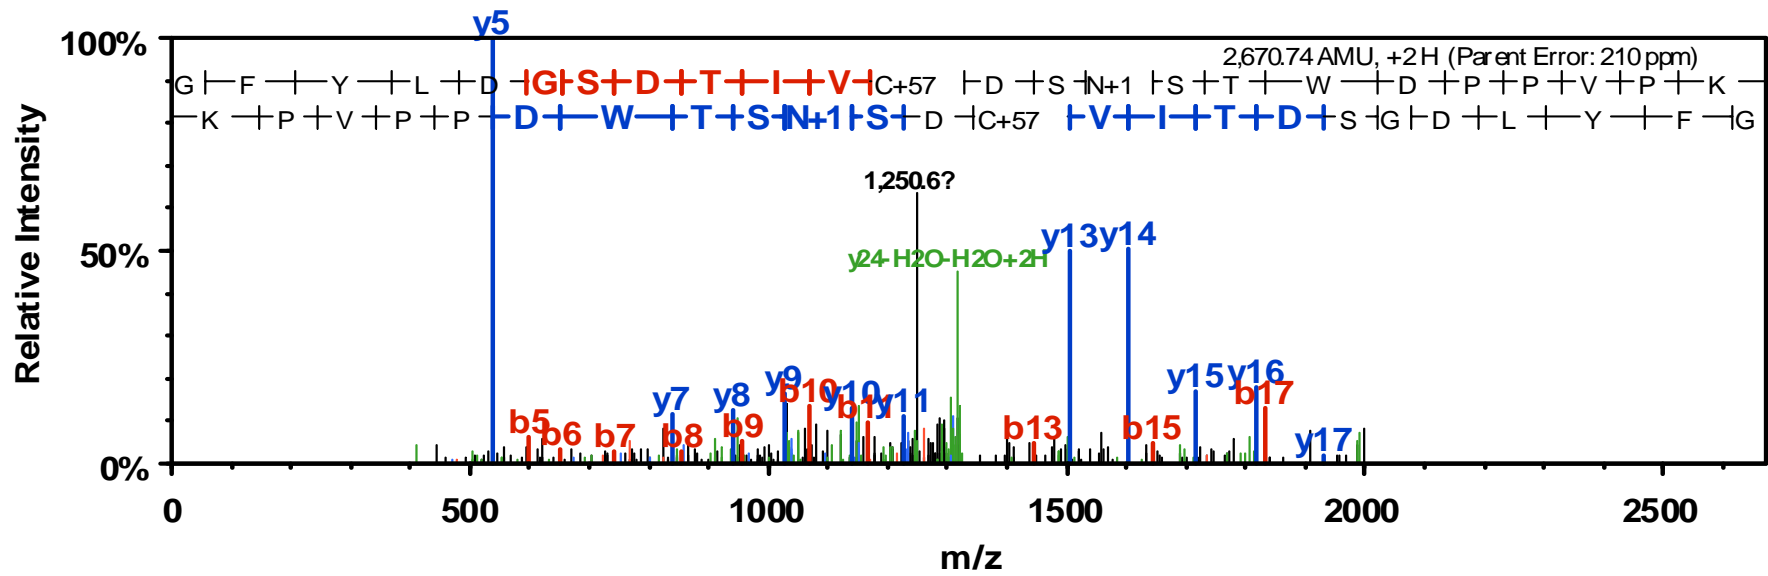

NBL1\_HUMAN

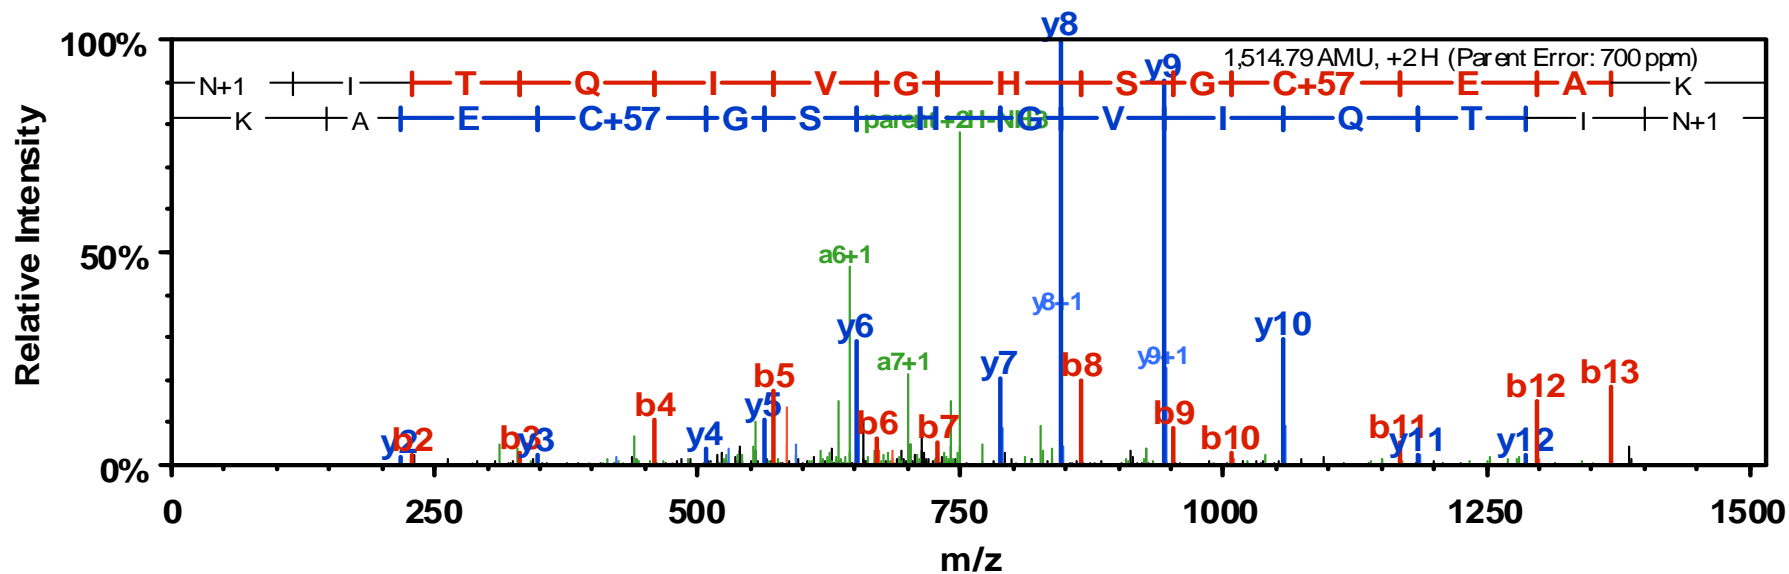

NPC1\_HUMAN

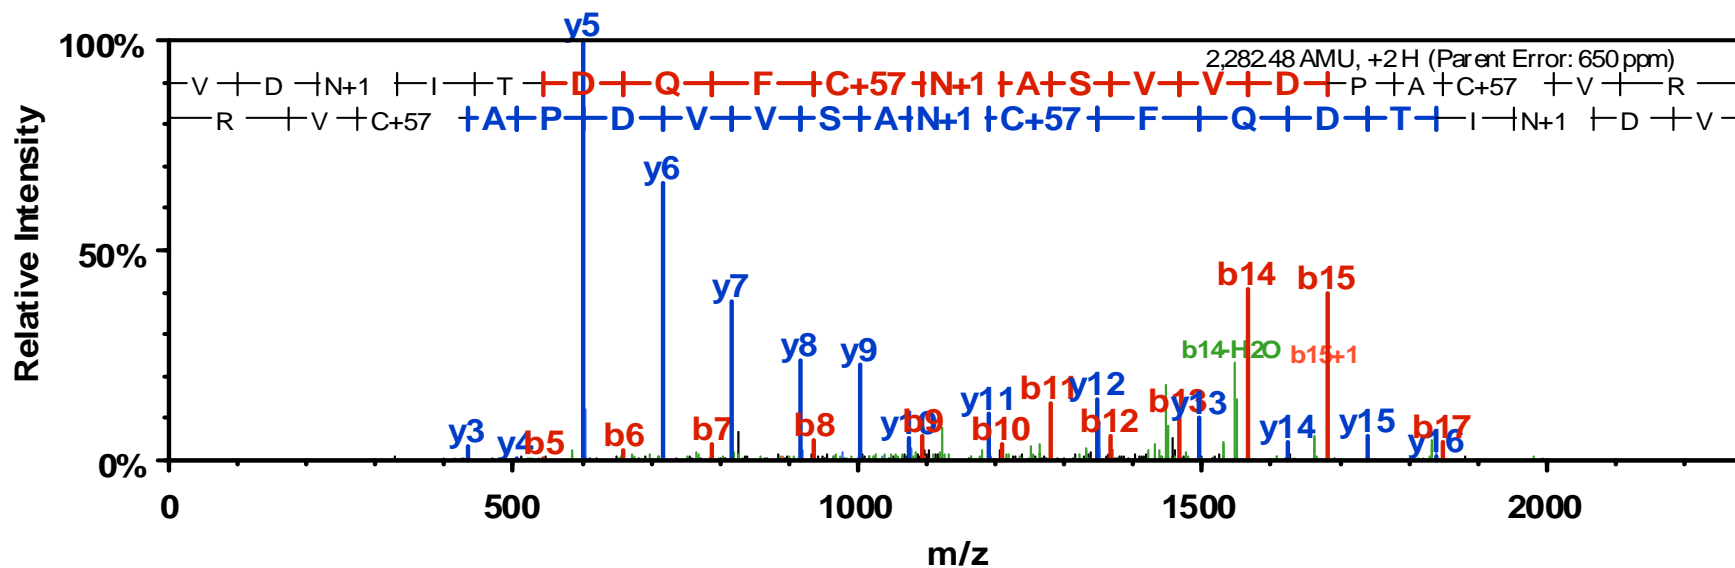

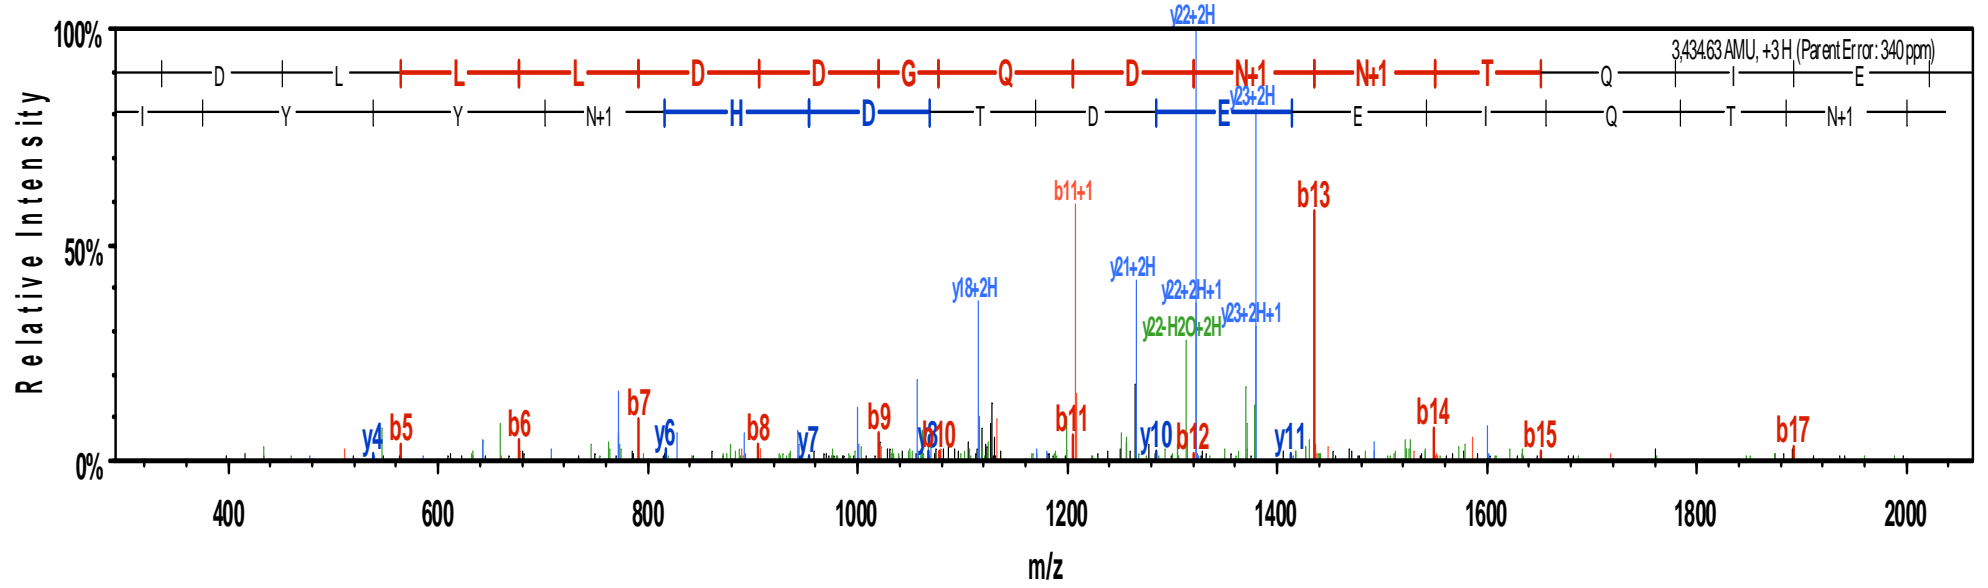

SCRB2\_HUMAN

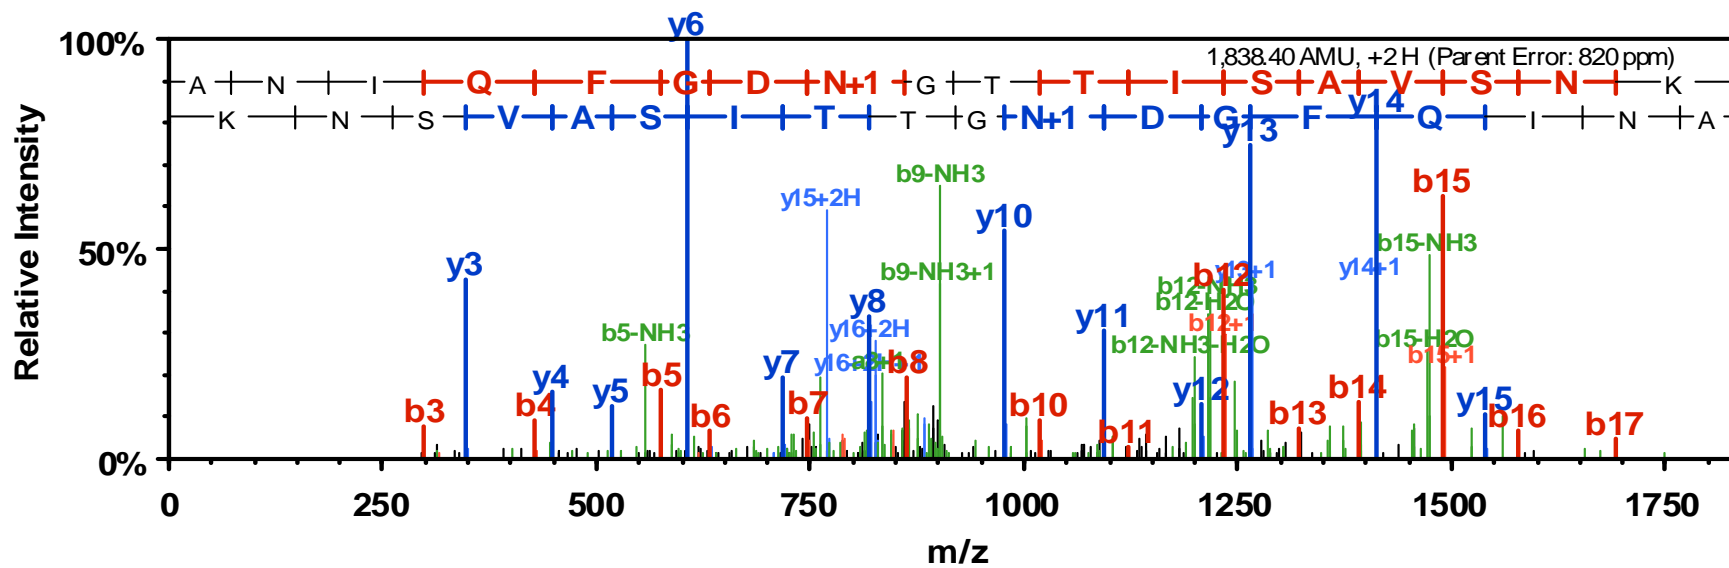

SYPL1\_HUMAN

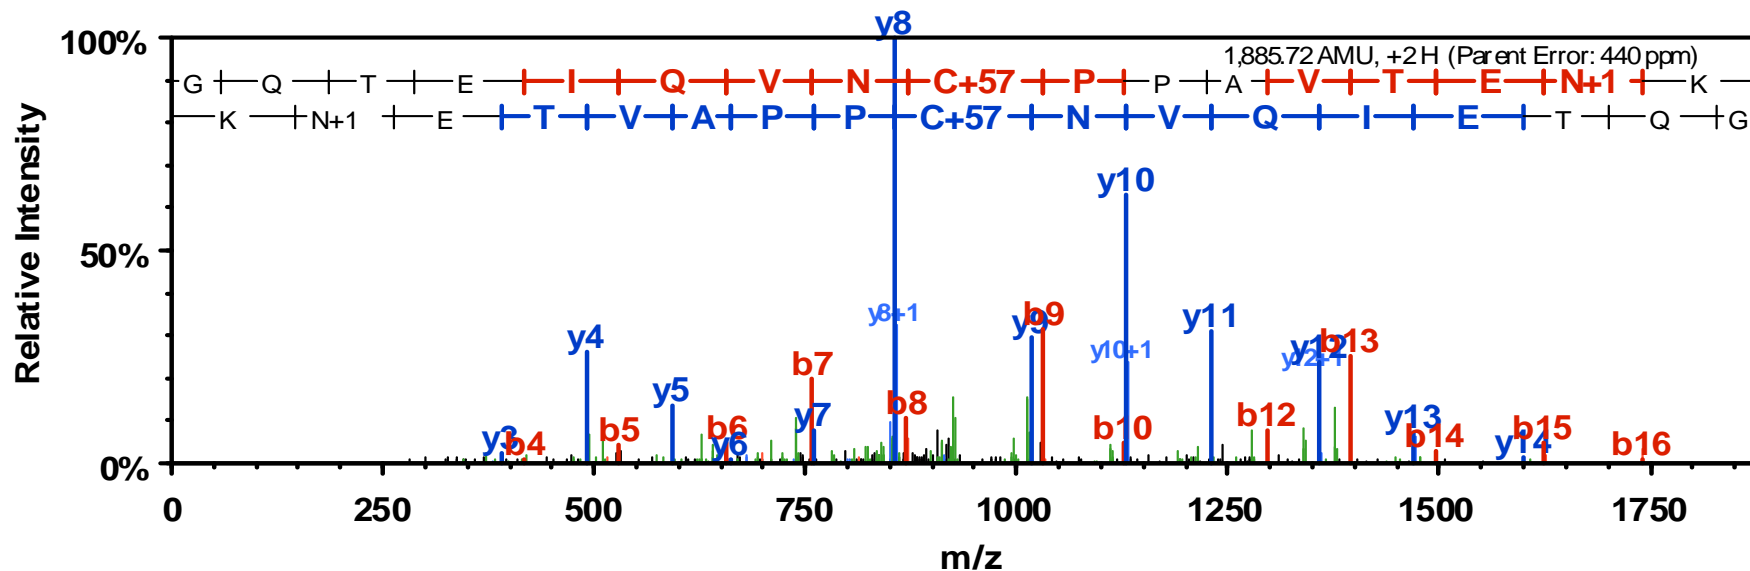

# MS/MS Spectra for Supporting the Newly Identified GlycoProteins in XTC-1 Cell Line Based on One Glycopeptide Identification

APLP2\_HUMAN

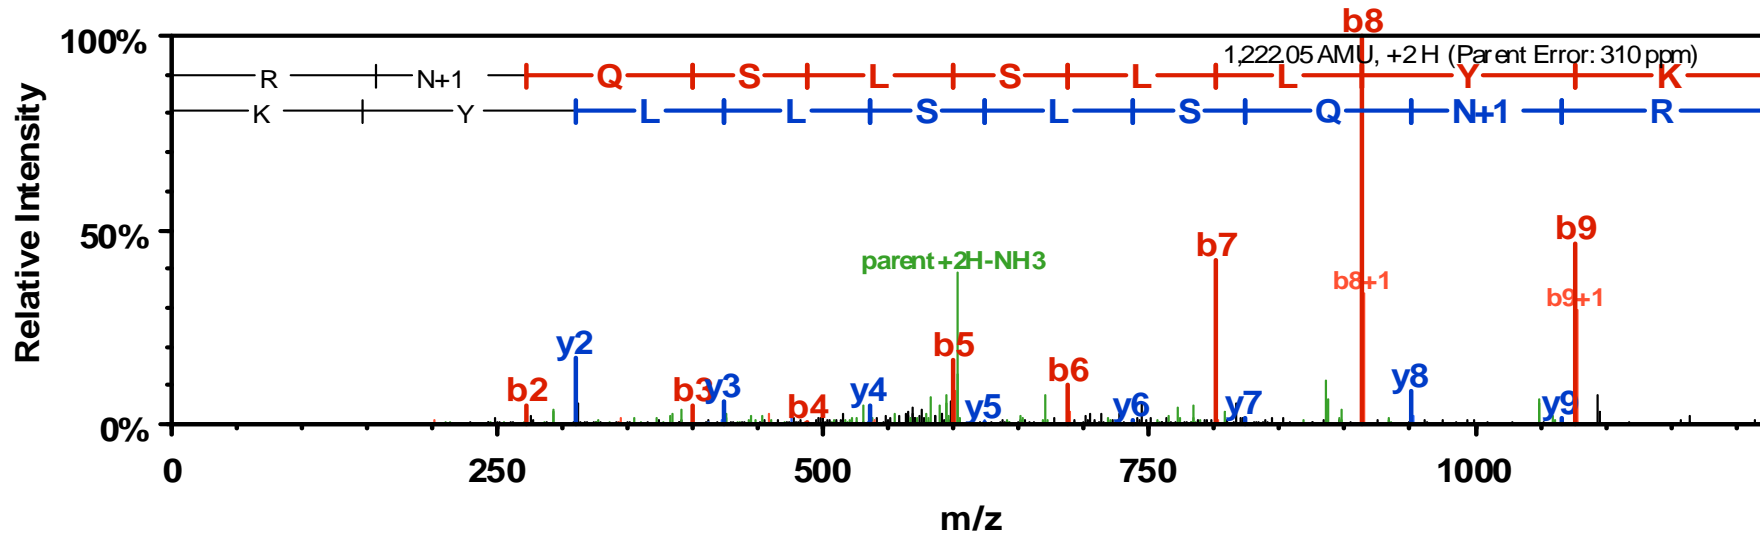

ASM\_HUMAN

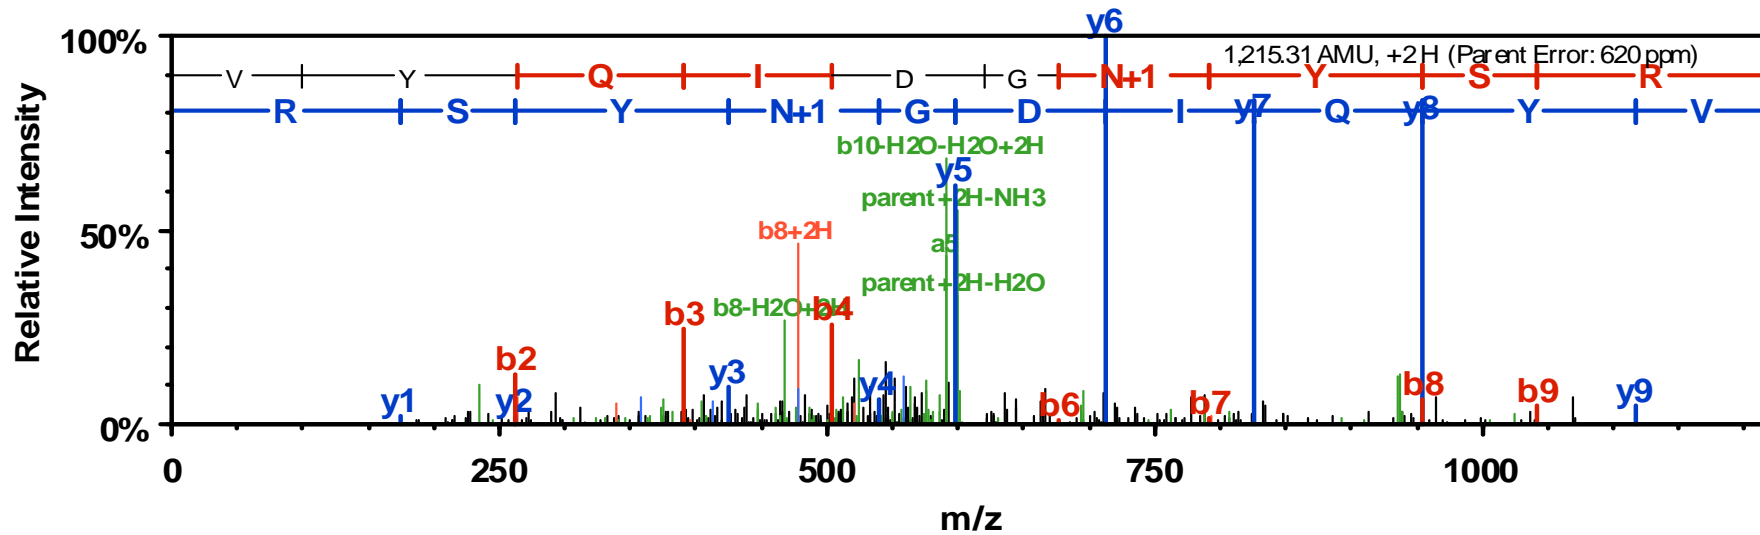

CBPE\_HUMAN

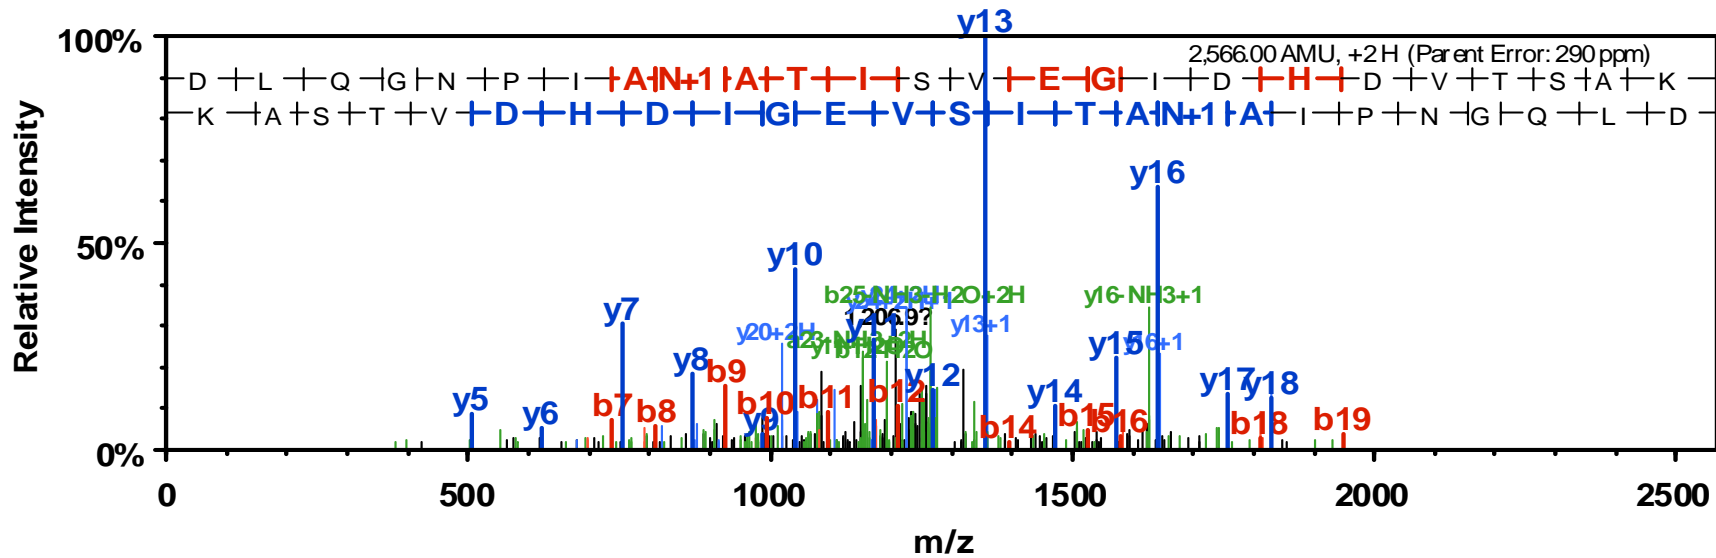

CT075\_HUMAN

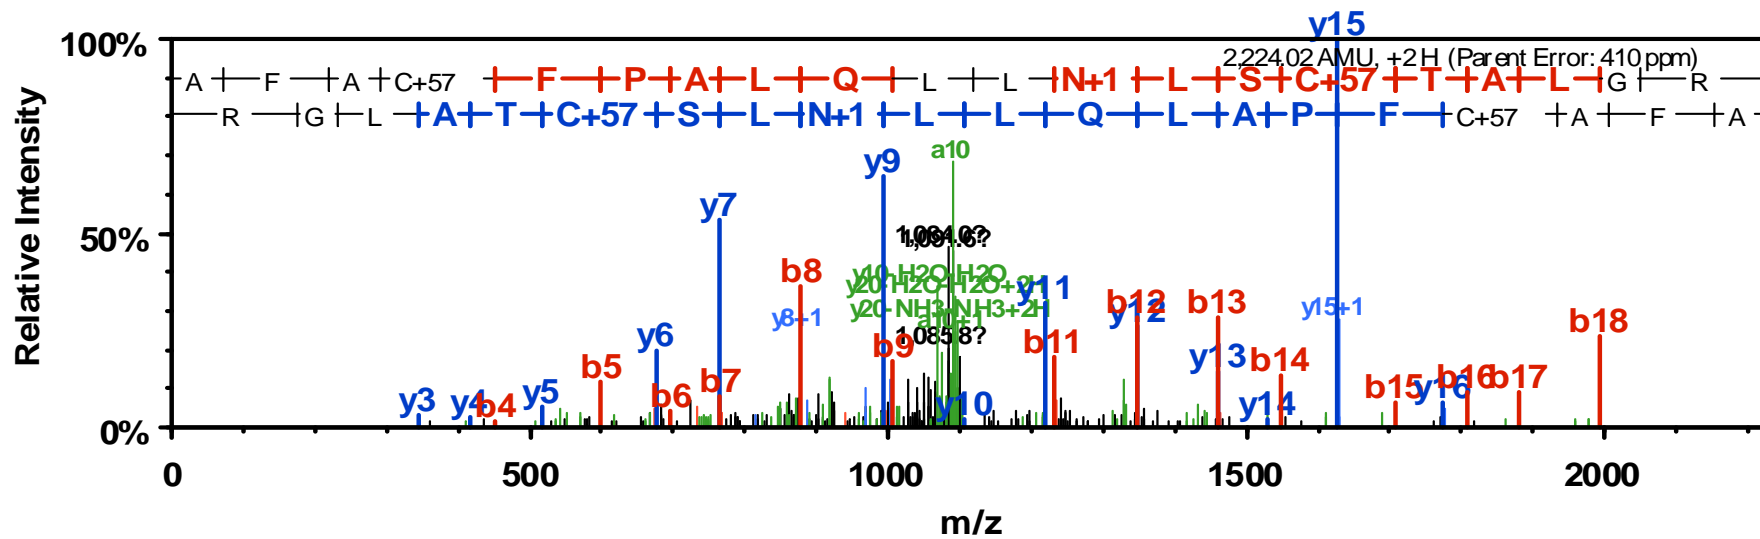

## EMR2\_HUMAN

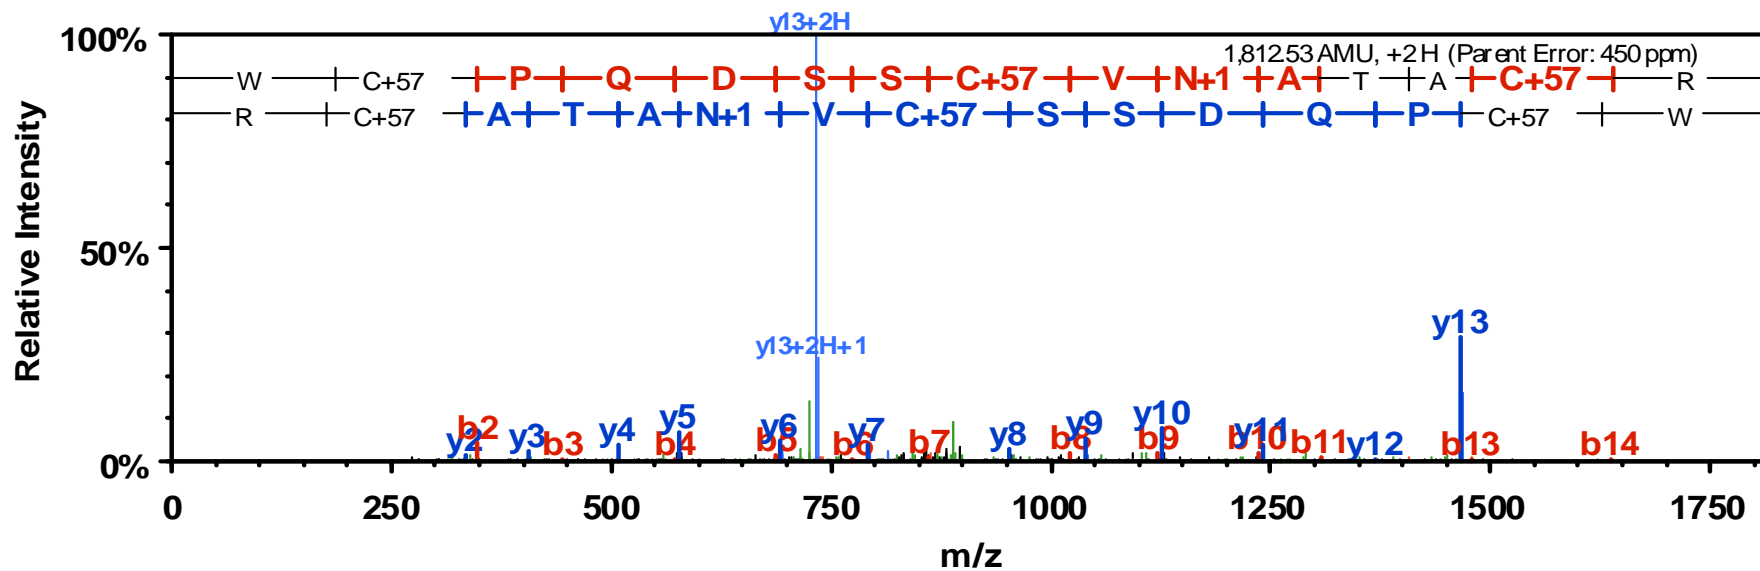

## FBN1\_HUMAN

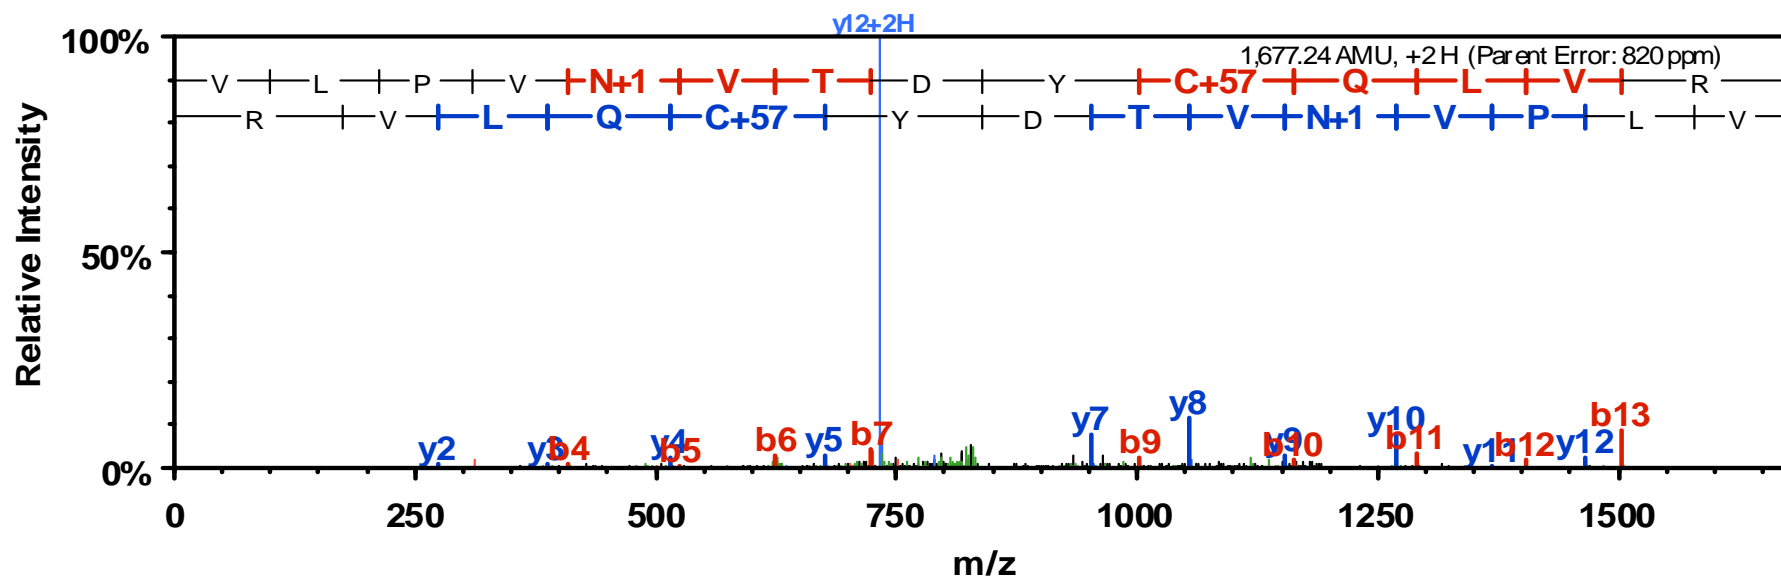



GPNMB\_HUMAN

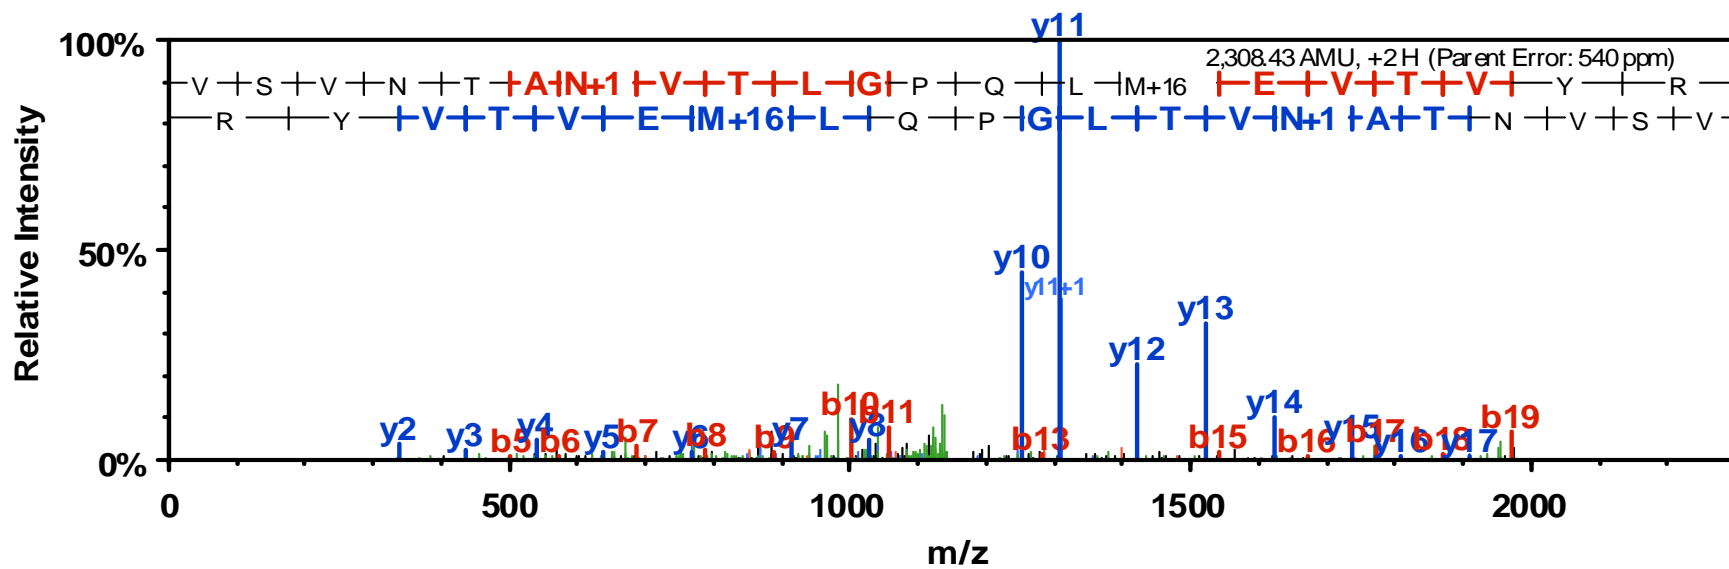

GPR56\_HUMAN

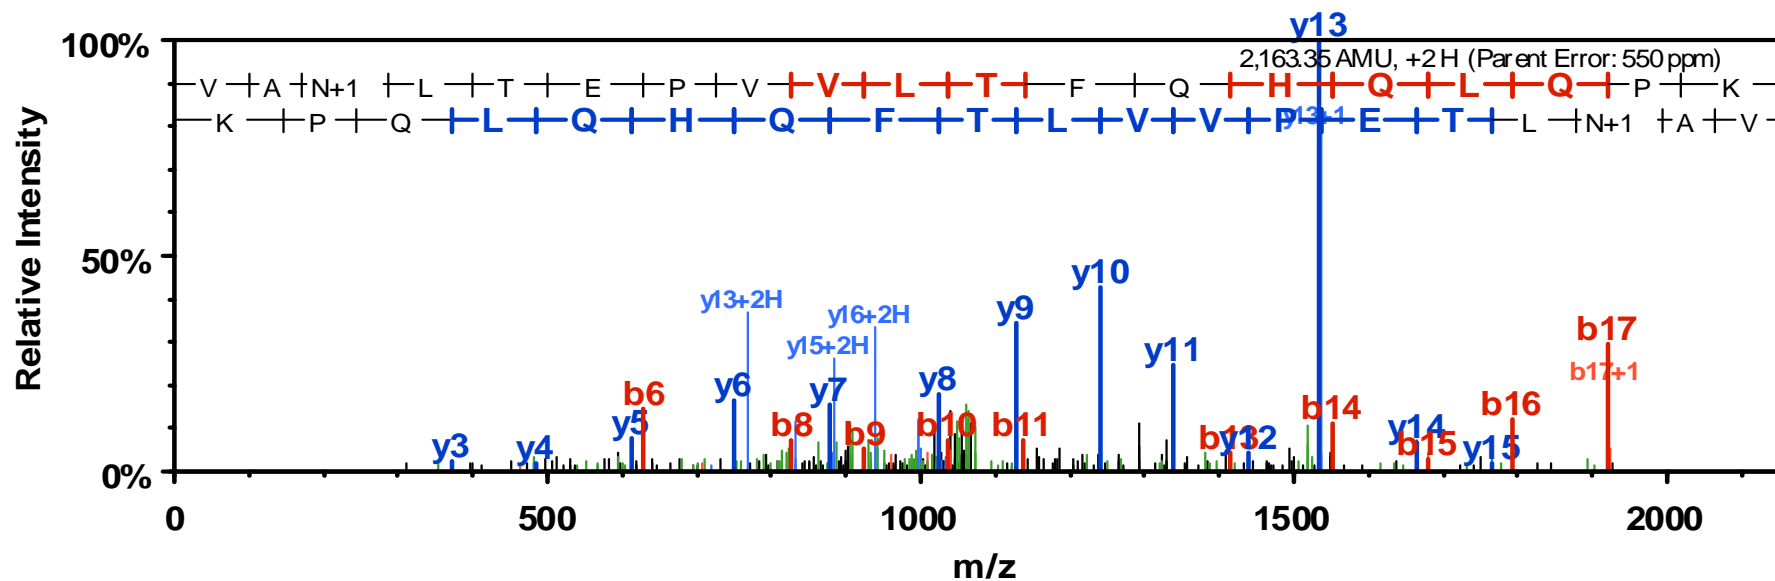

HEMO\_HUMAN

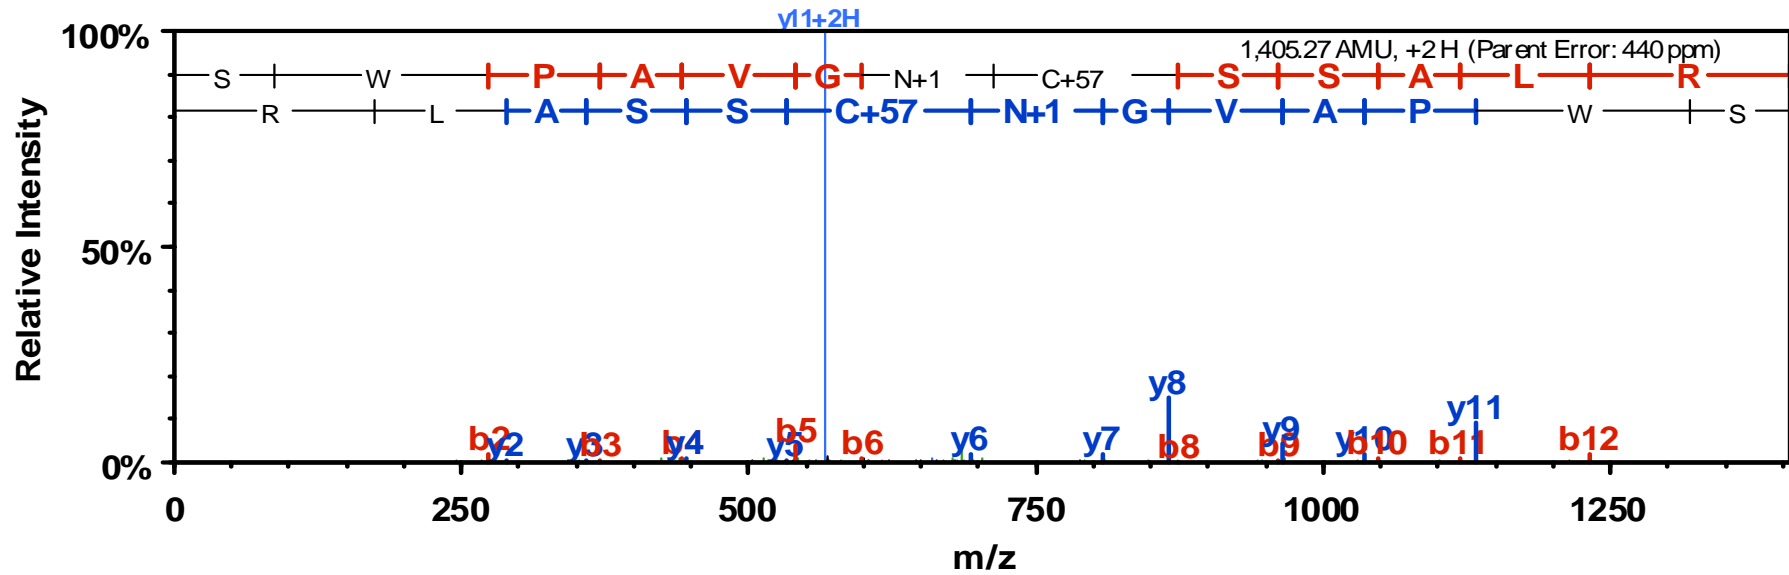

IBP3\_HUMAN

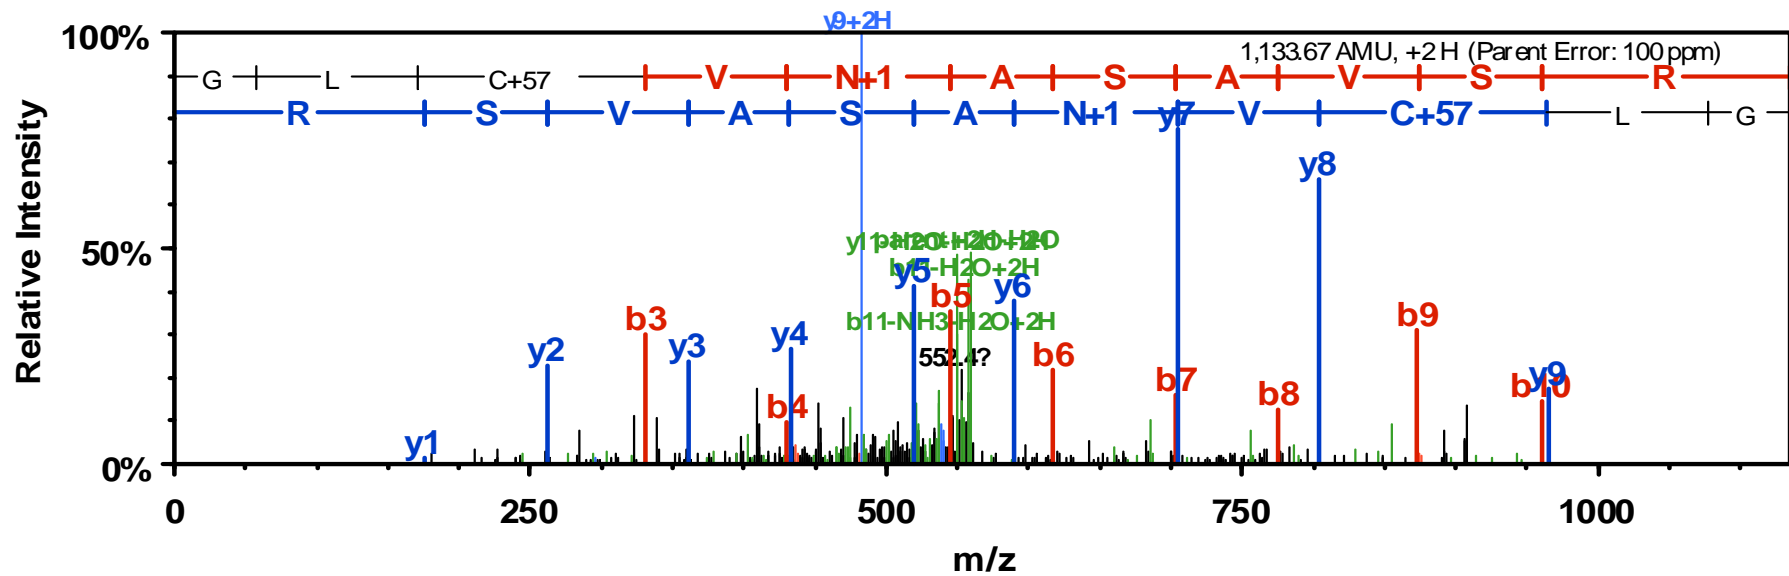

IGSF8\_HUMAN

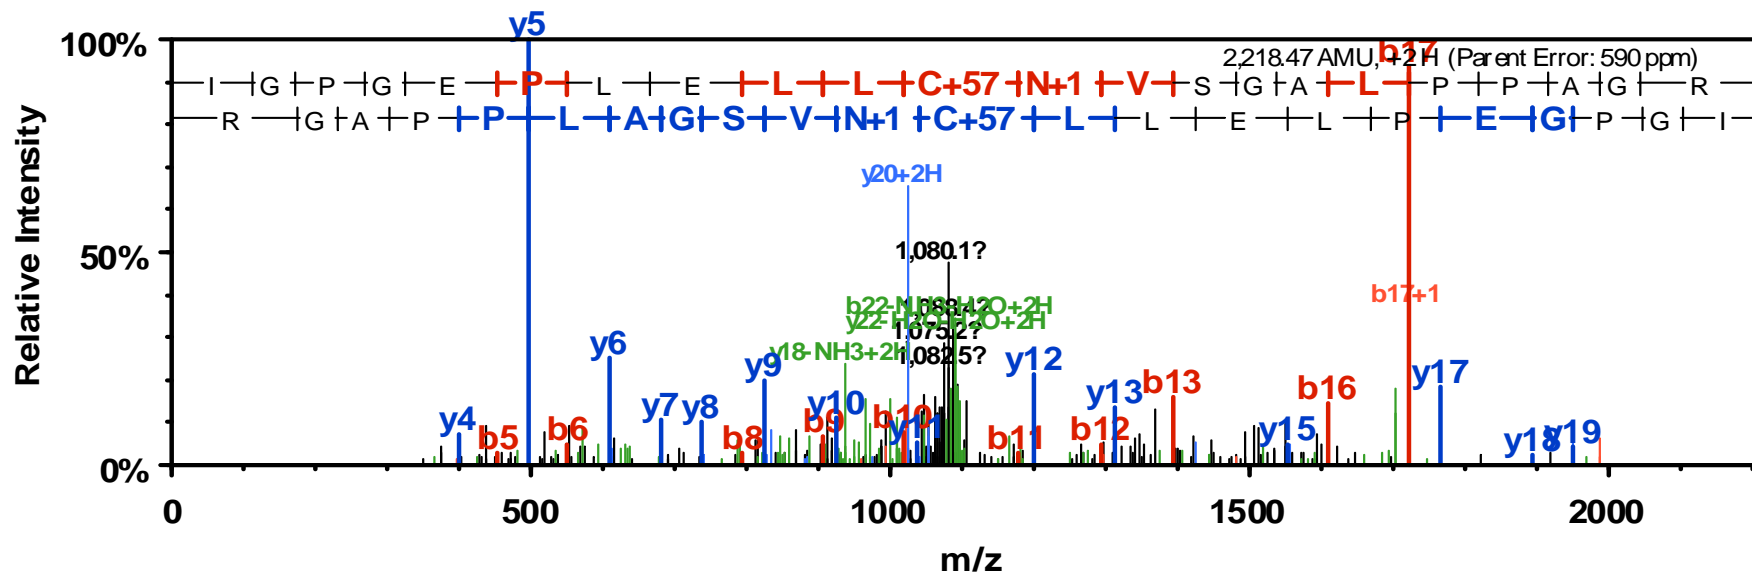

LSAMP\_HUMAN

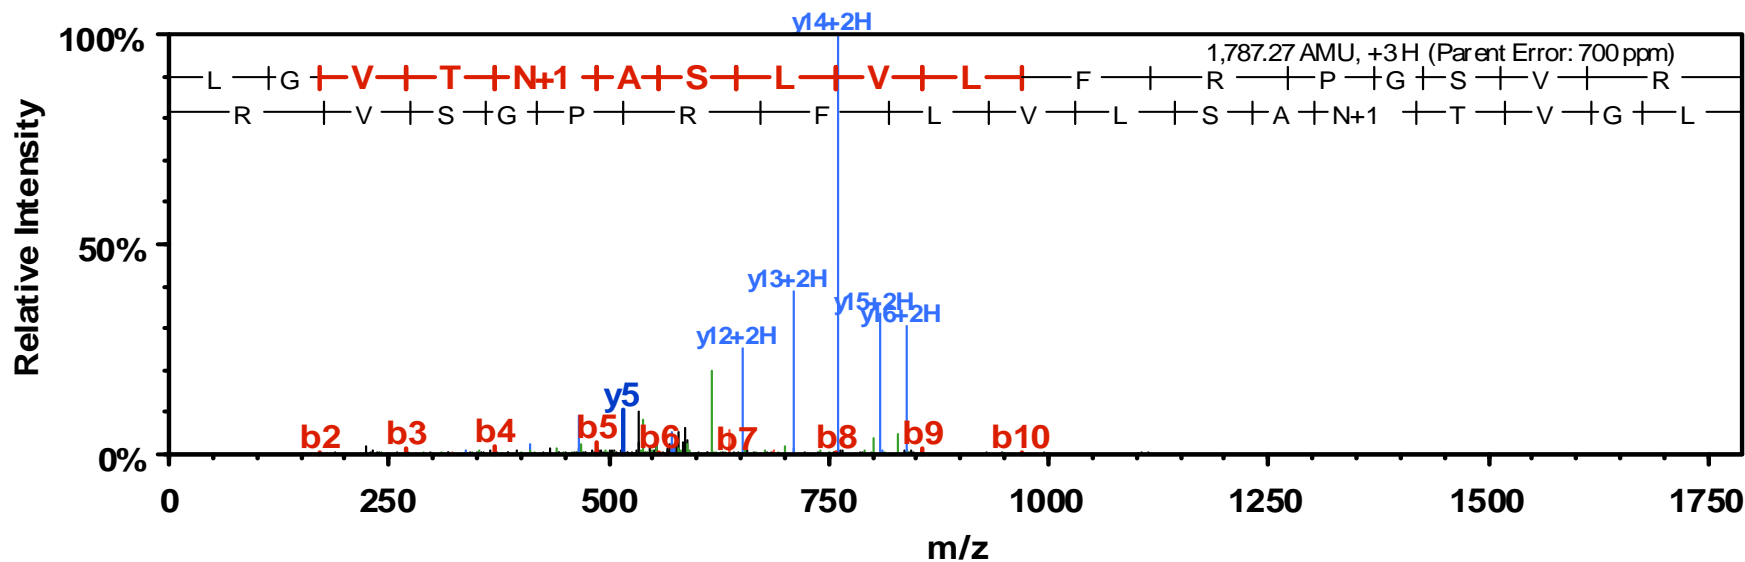

LYPD3\_HUMAN

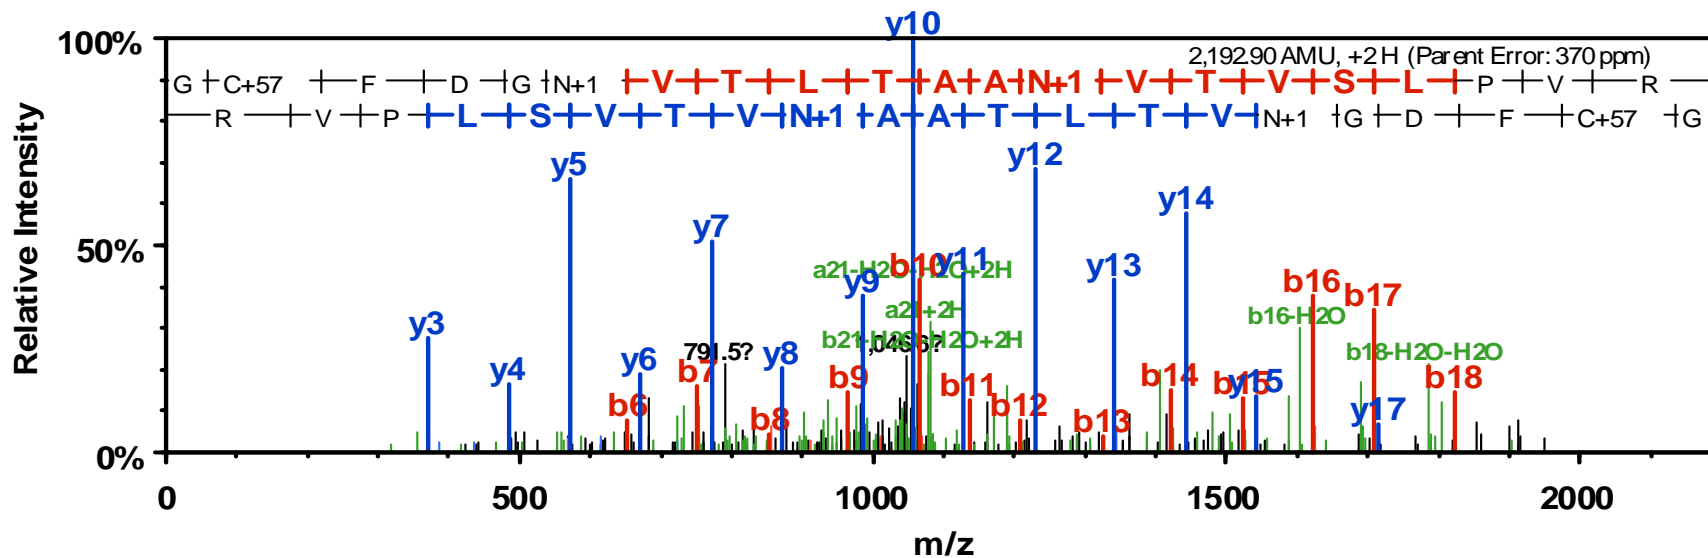

P4HA1\_HUMAN

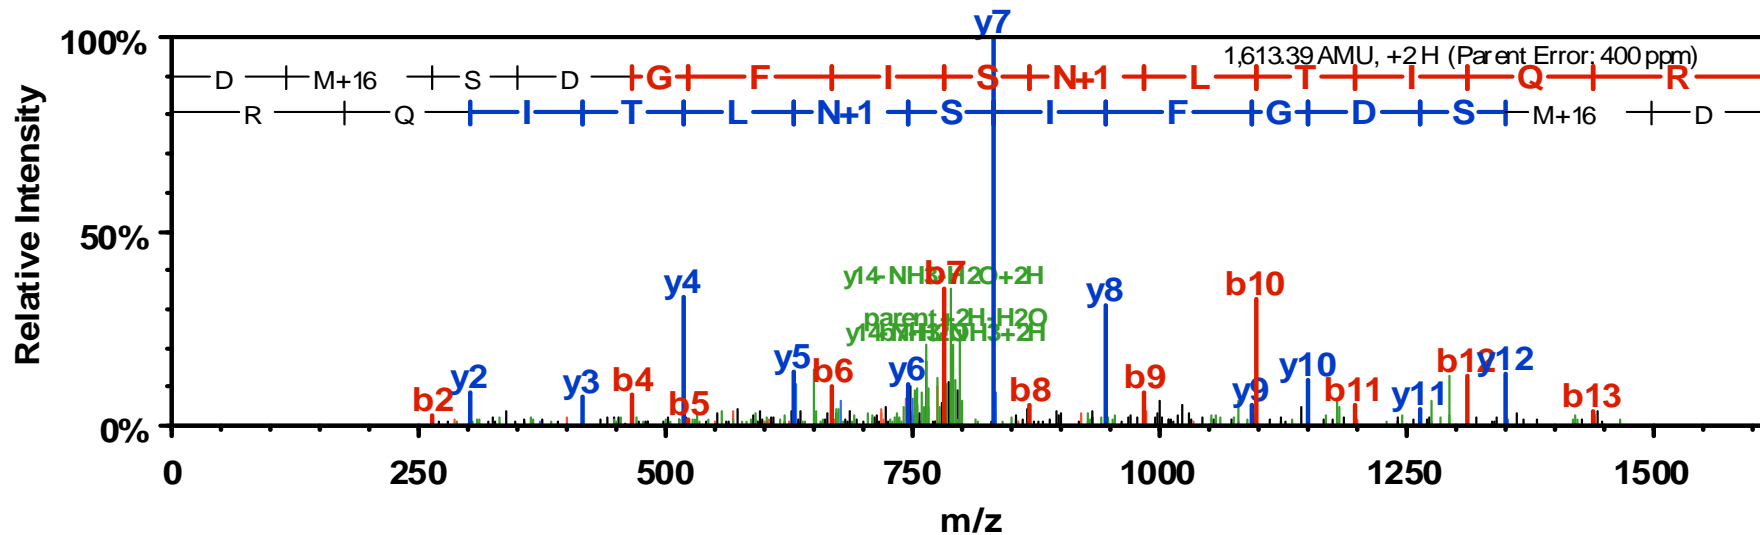

PVR\_HUMAN

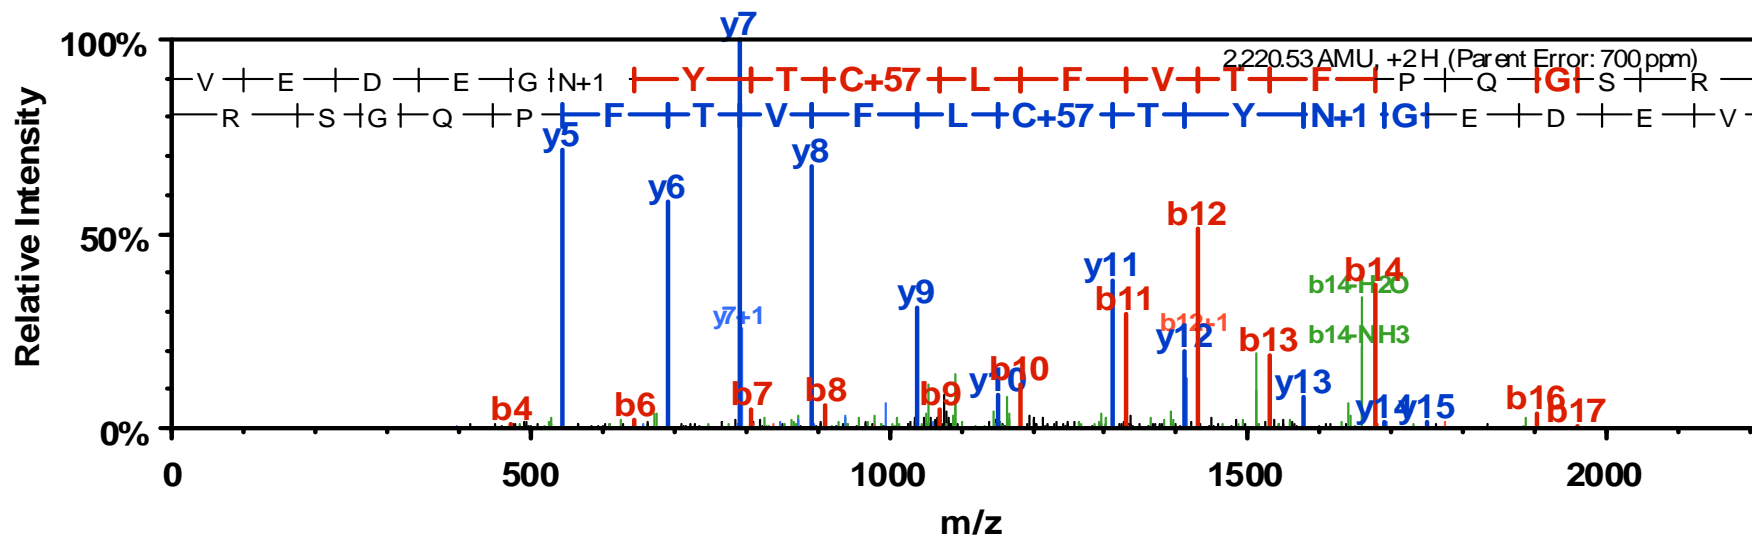

ST14\_HUMAN

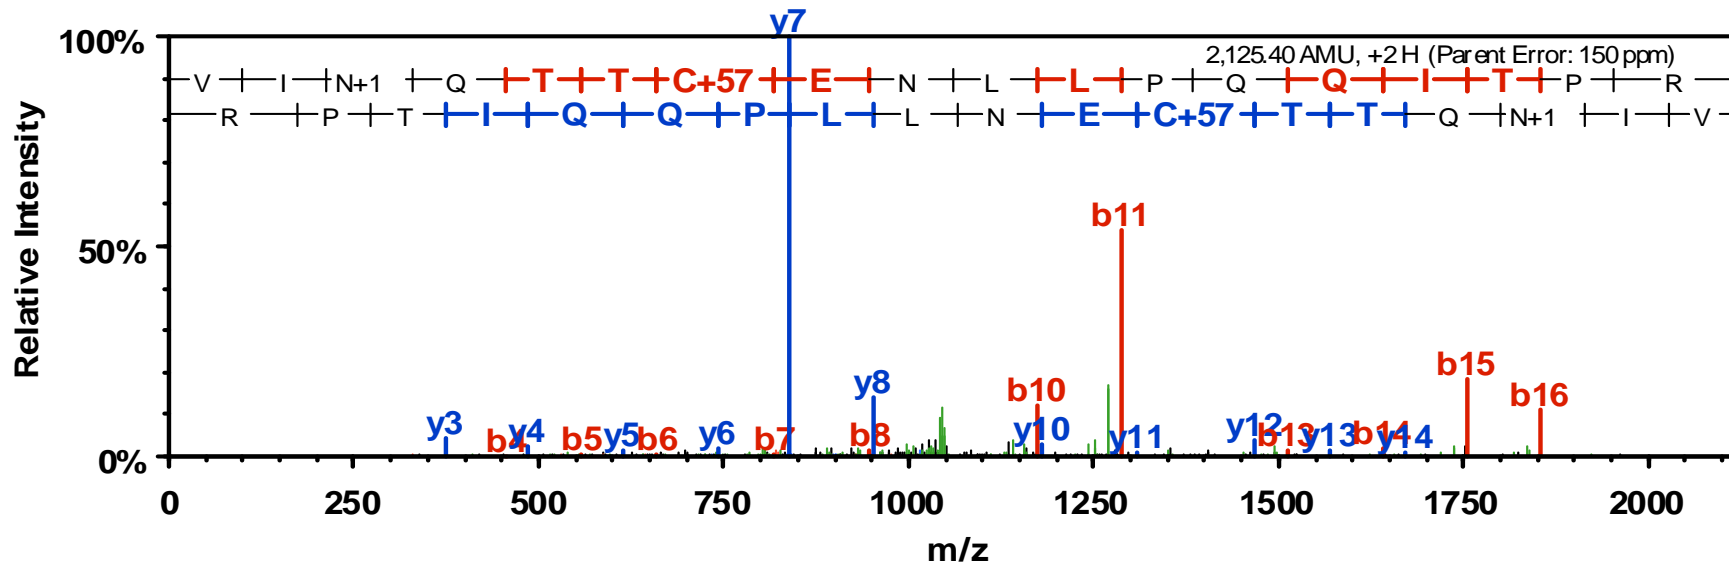

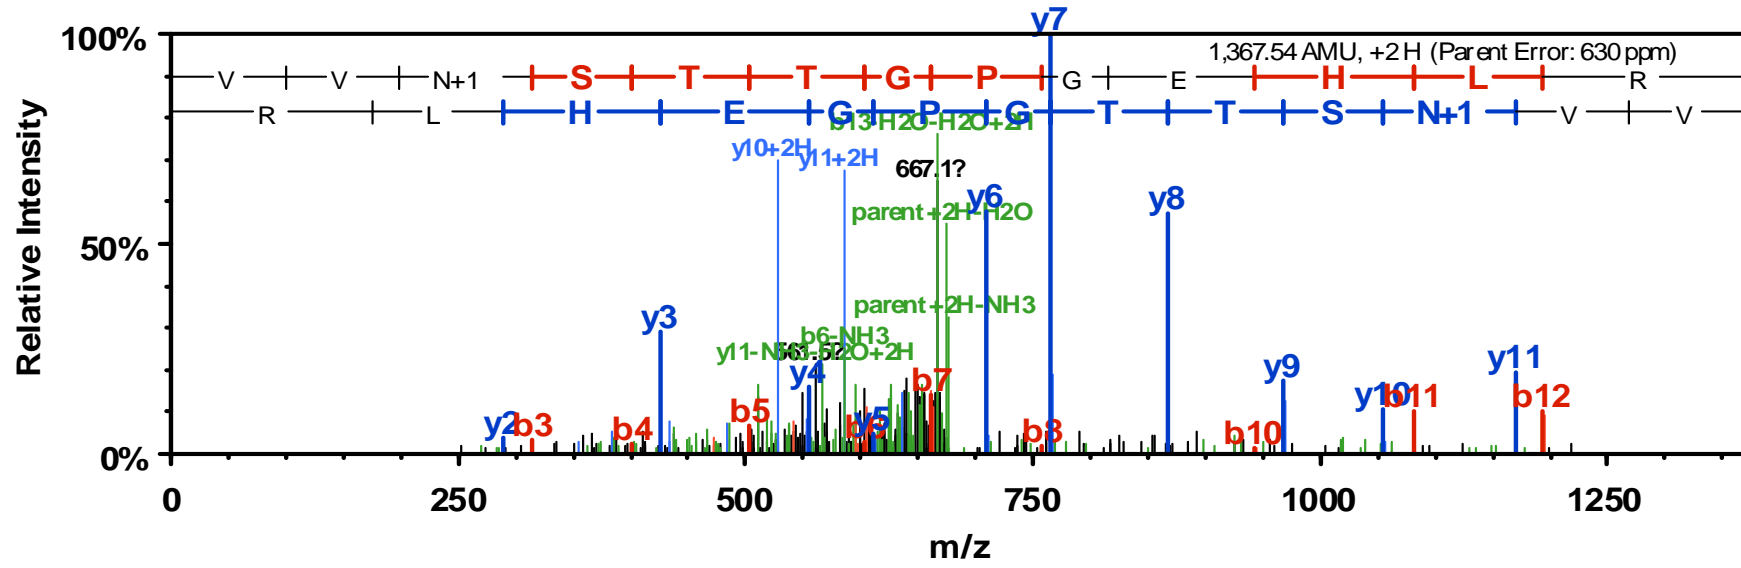

# MS/MS Spectra for Supporting the Newly Identified GlycoProteins in ARO Cell Line Based on One Glycopeptide Identification

ATRN\_HUMAN

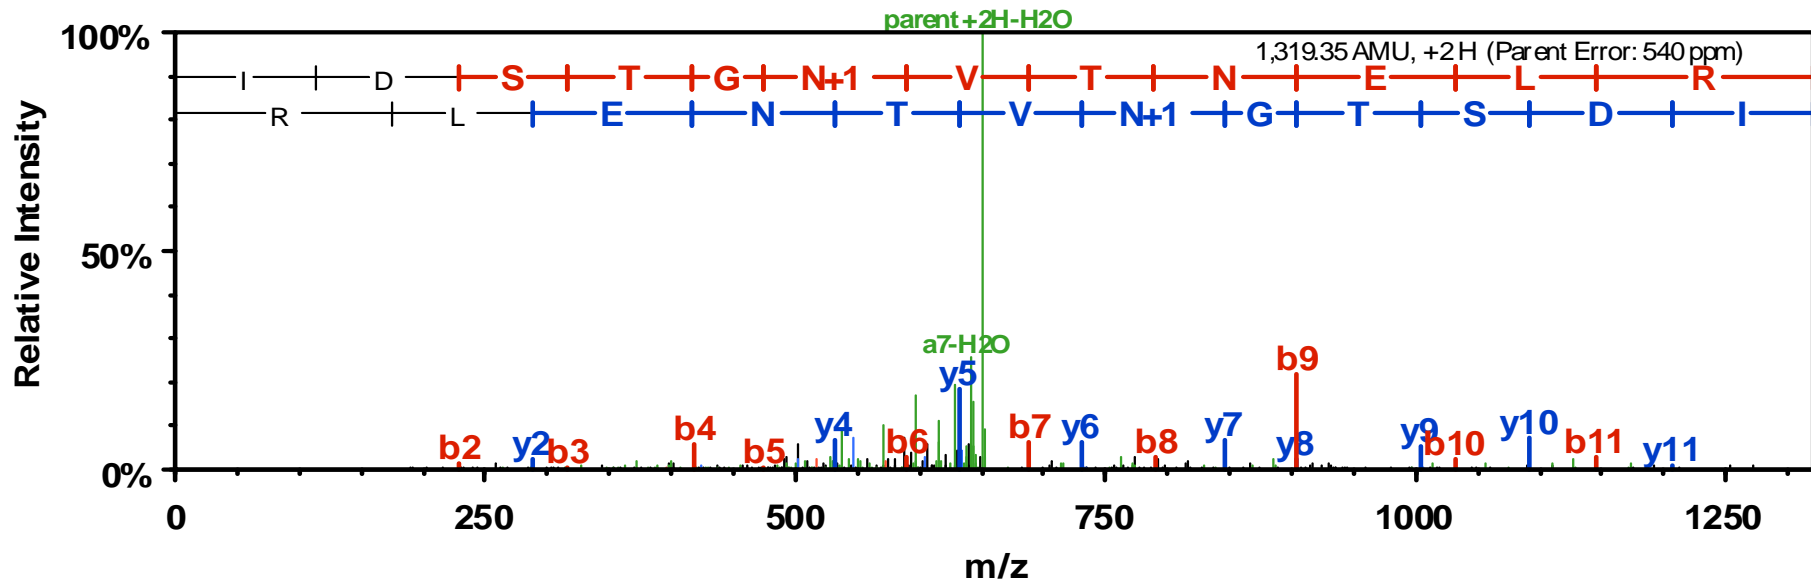

CTL2\_HUMAN

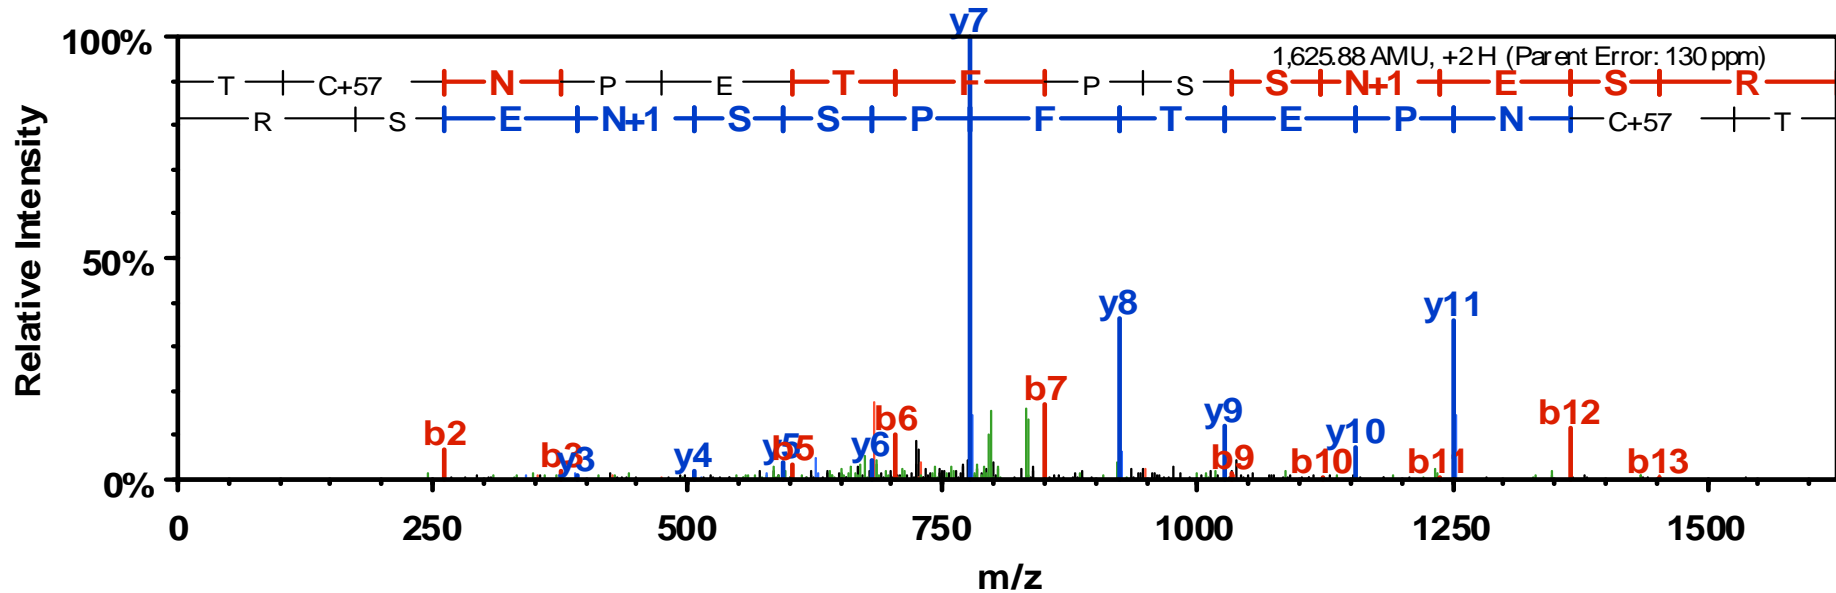

EMR2\_HUMAN

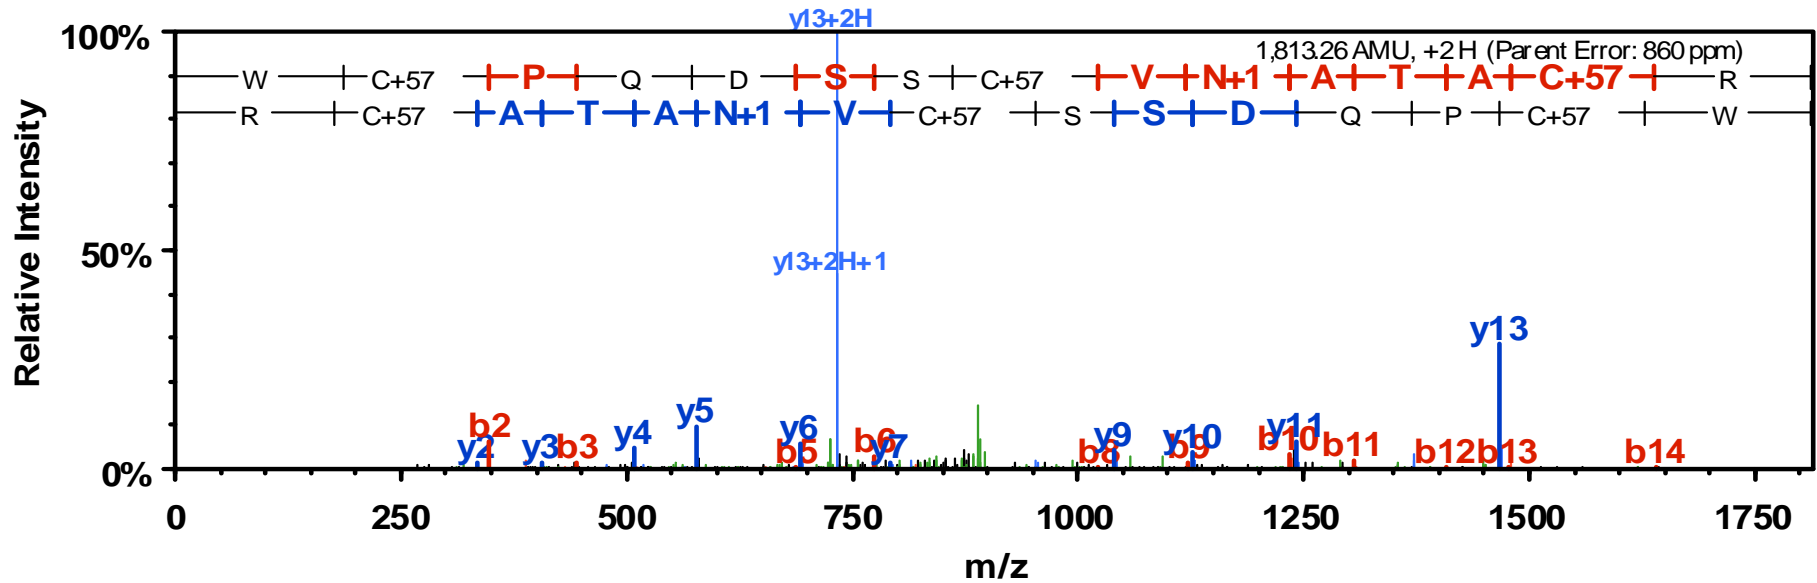

HEMO\_HUMAN

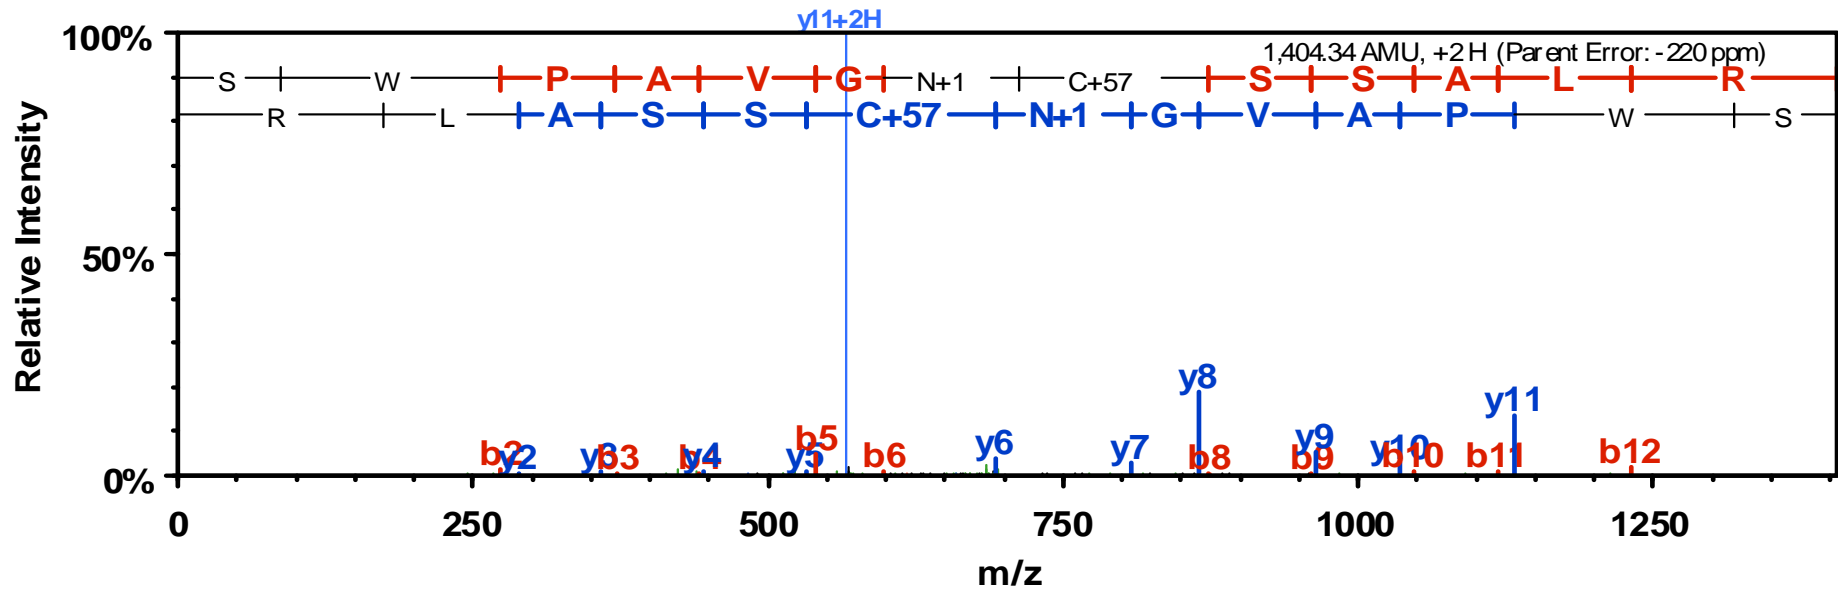

LYP A3\_HUMAN



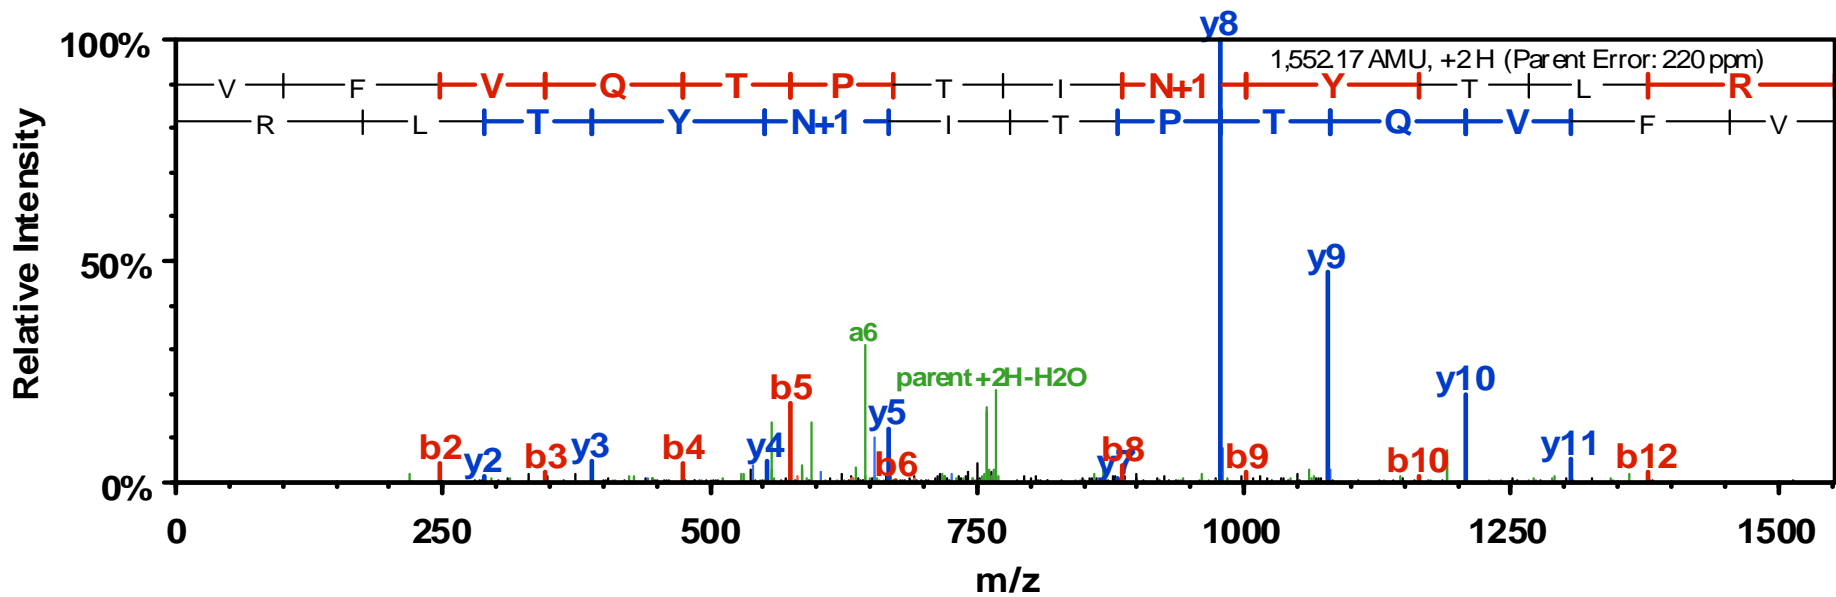

PODXL\_HUMAN

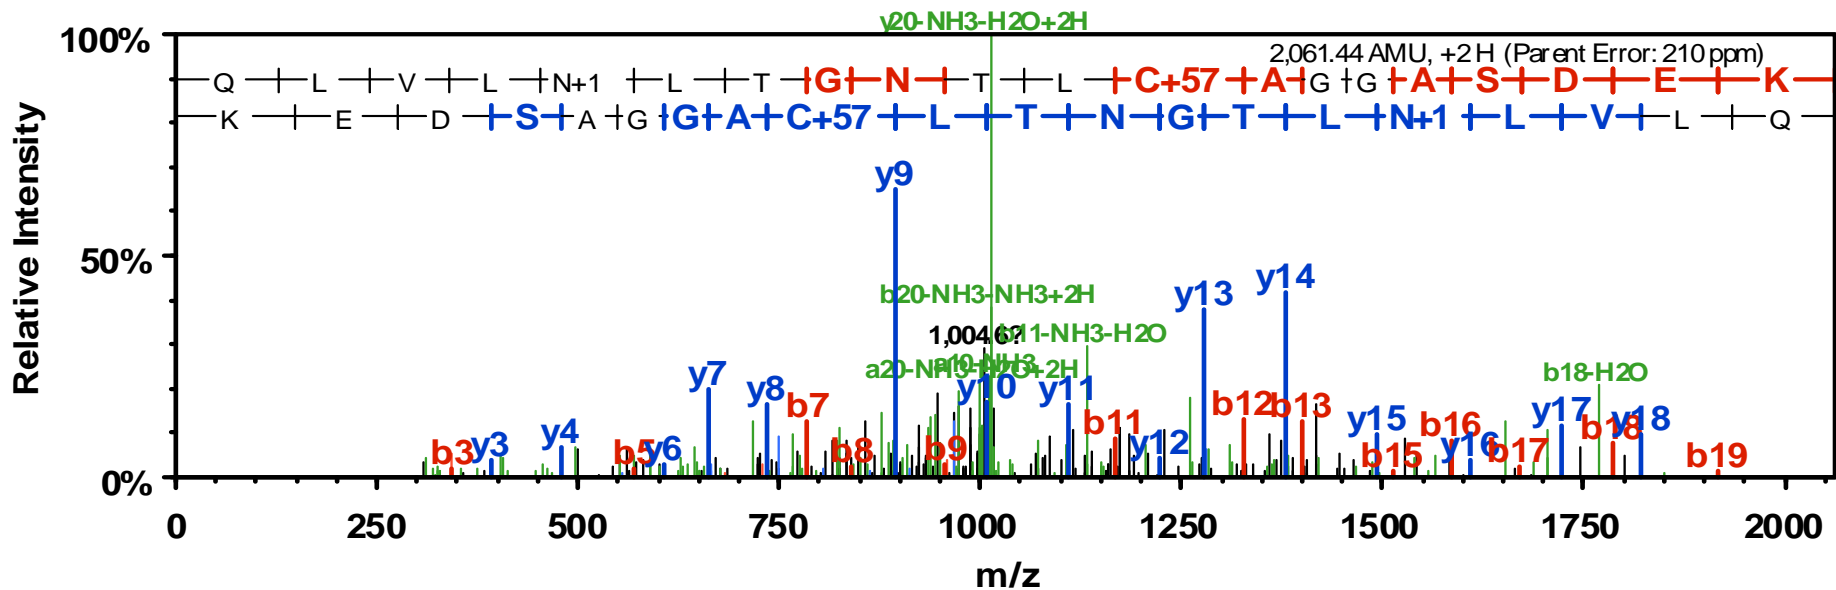

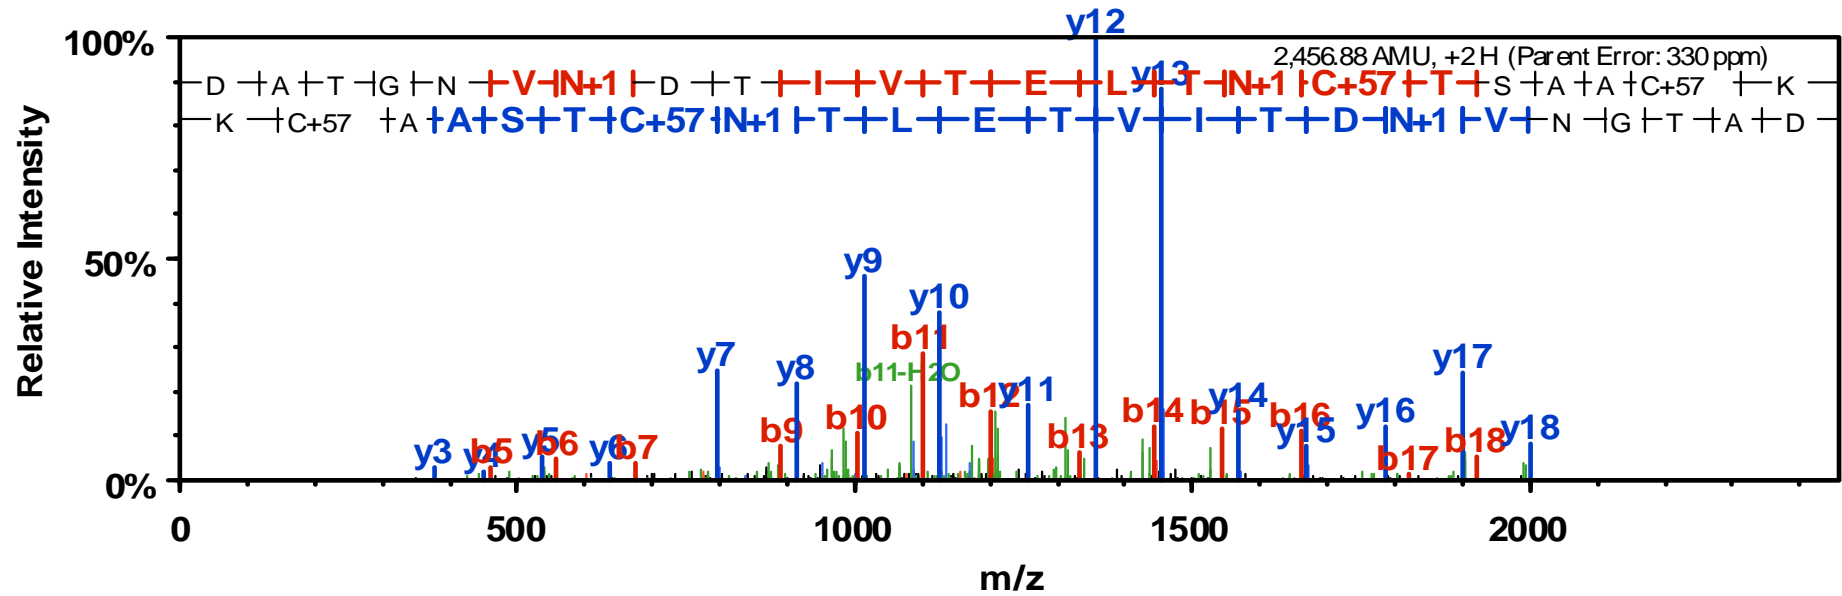

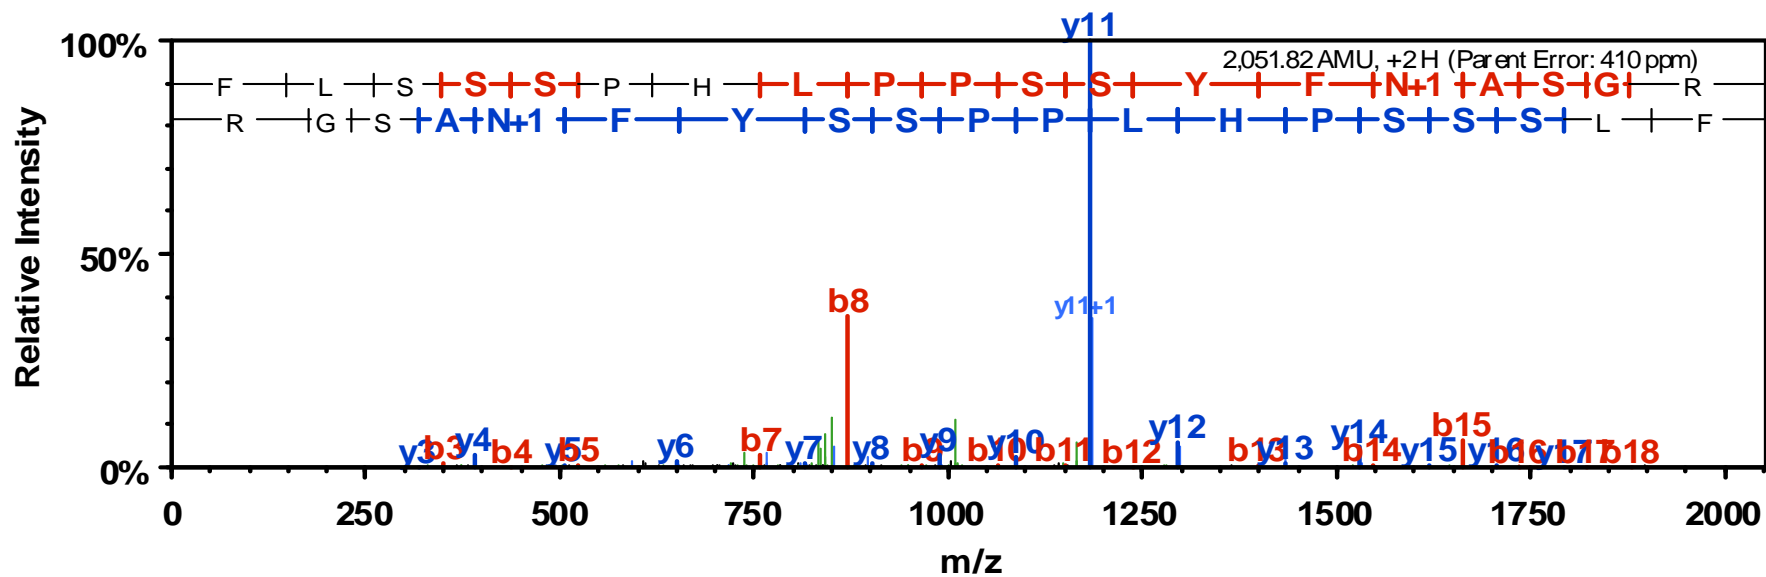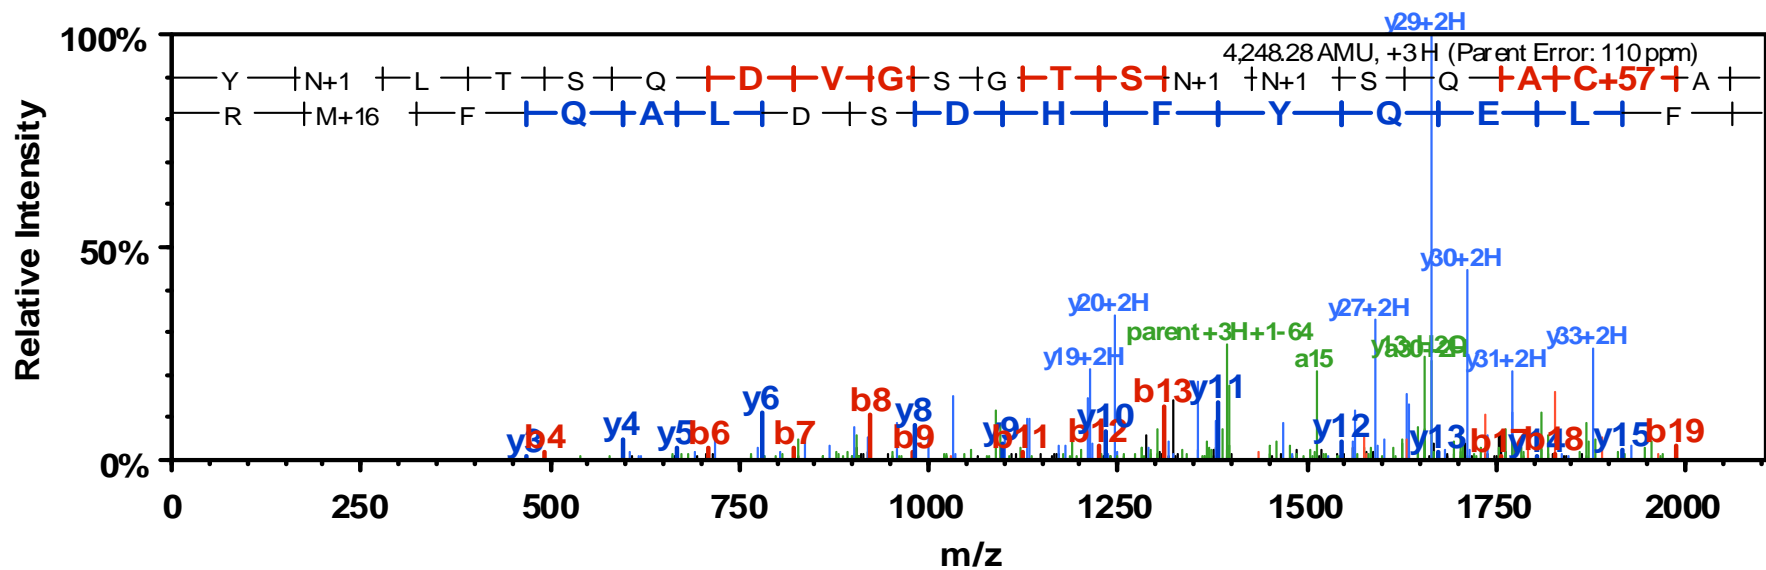

# MS/MS Spectra for Supporting the Newly Identified GlycoProteins in DRO-1 Cell Line Based on One Glycopeptide Identification

CBPE\_HUMAN

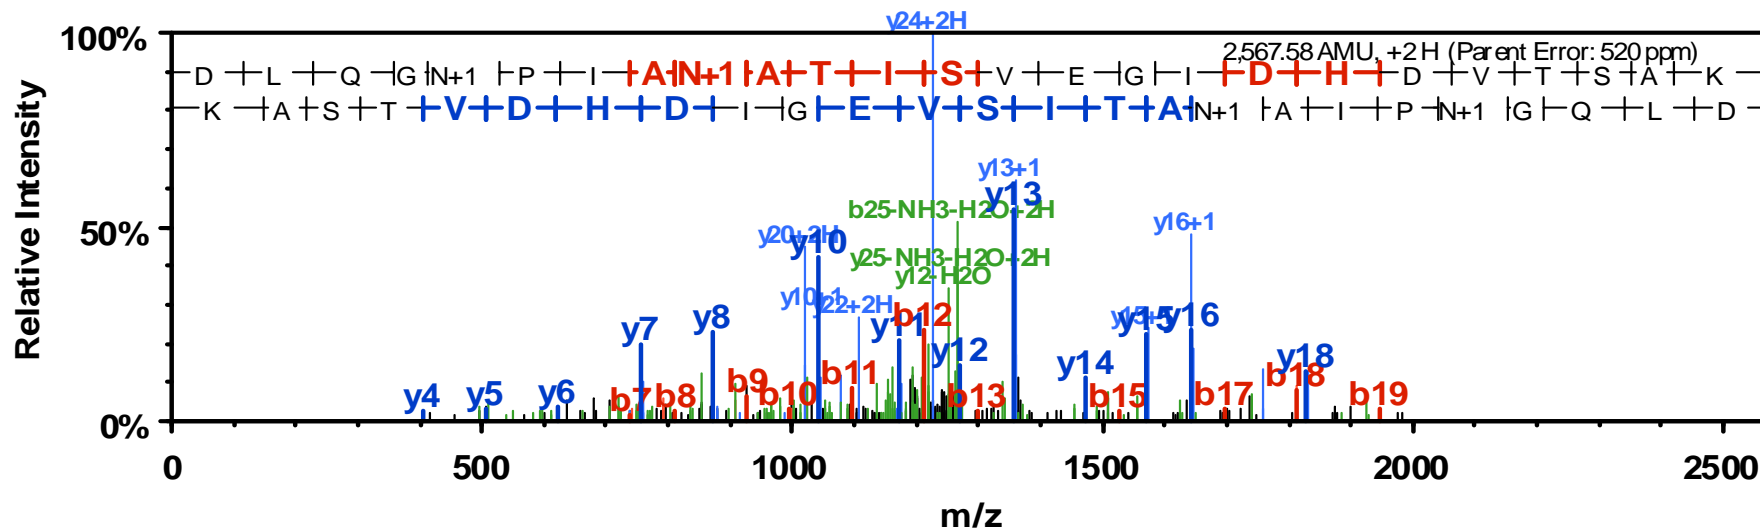

FKBP9\_HUMAN

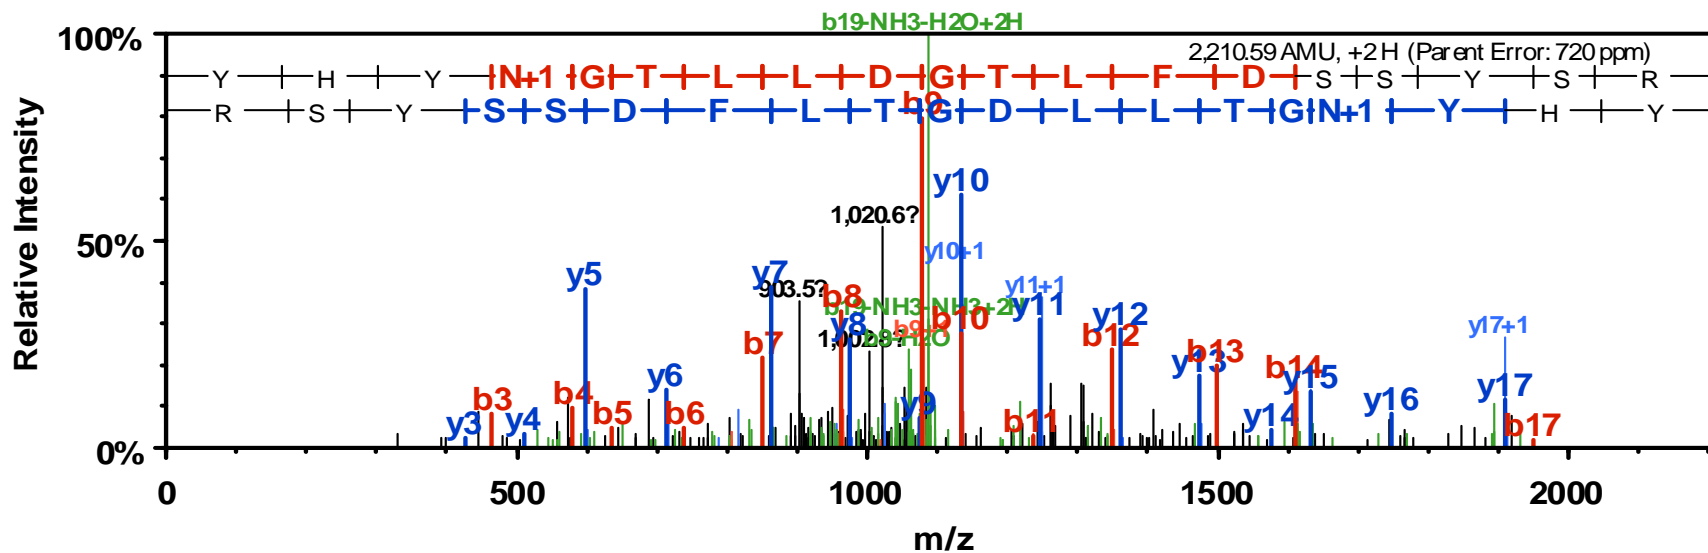

HEMO\_HUMAN

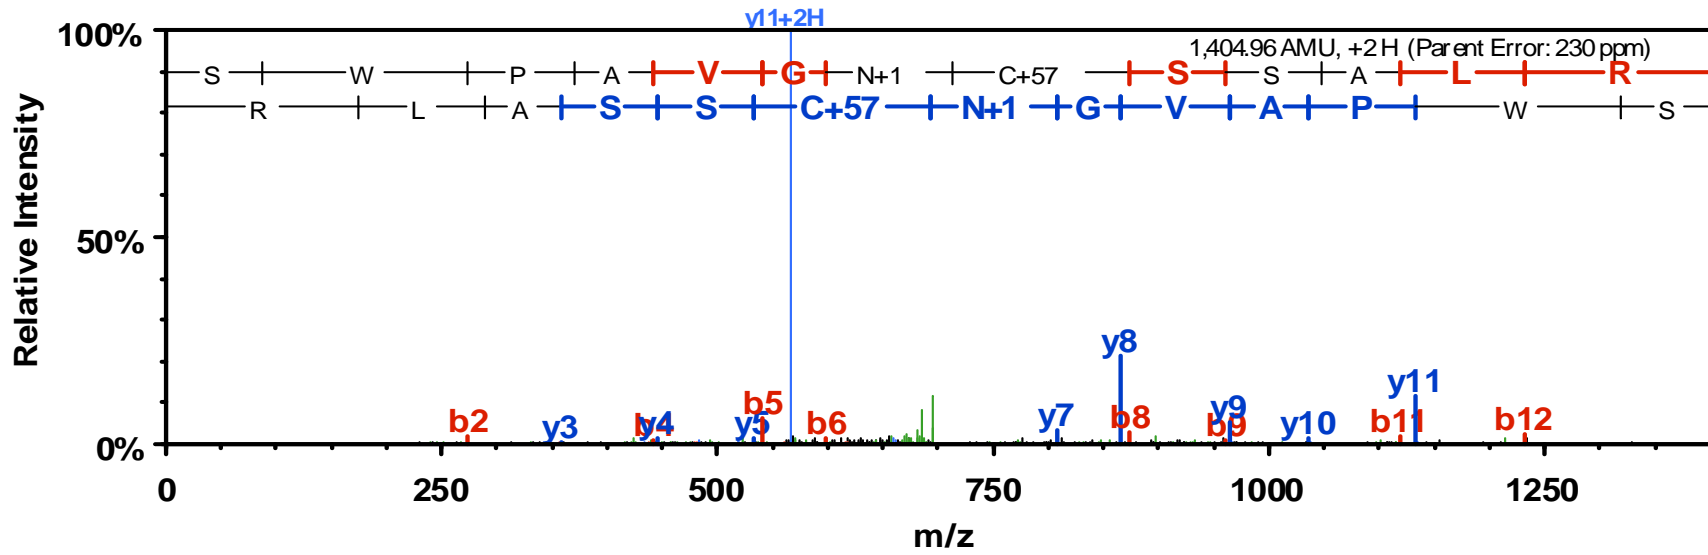

IPSP\_HUMAN

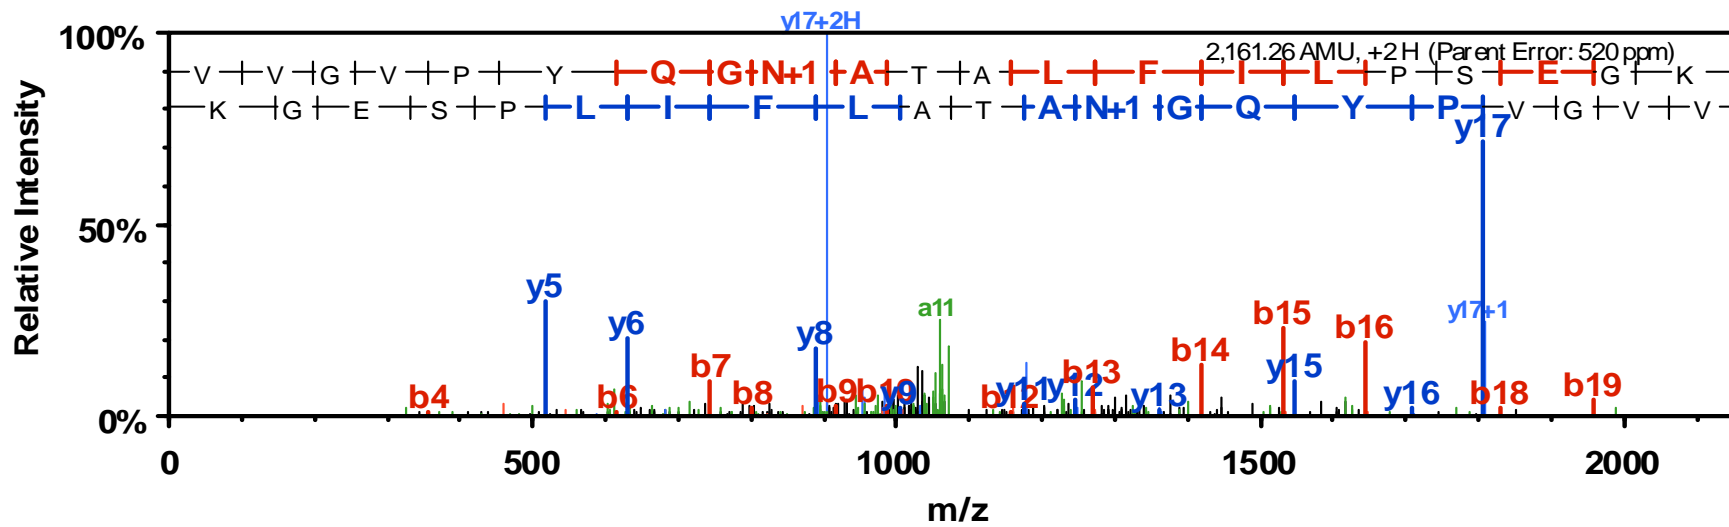

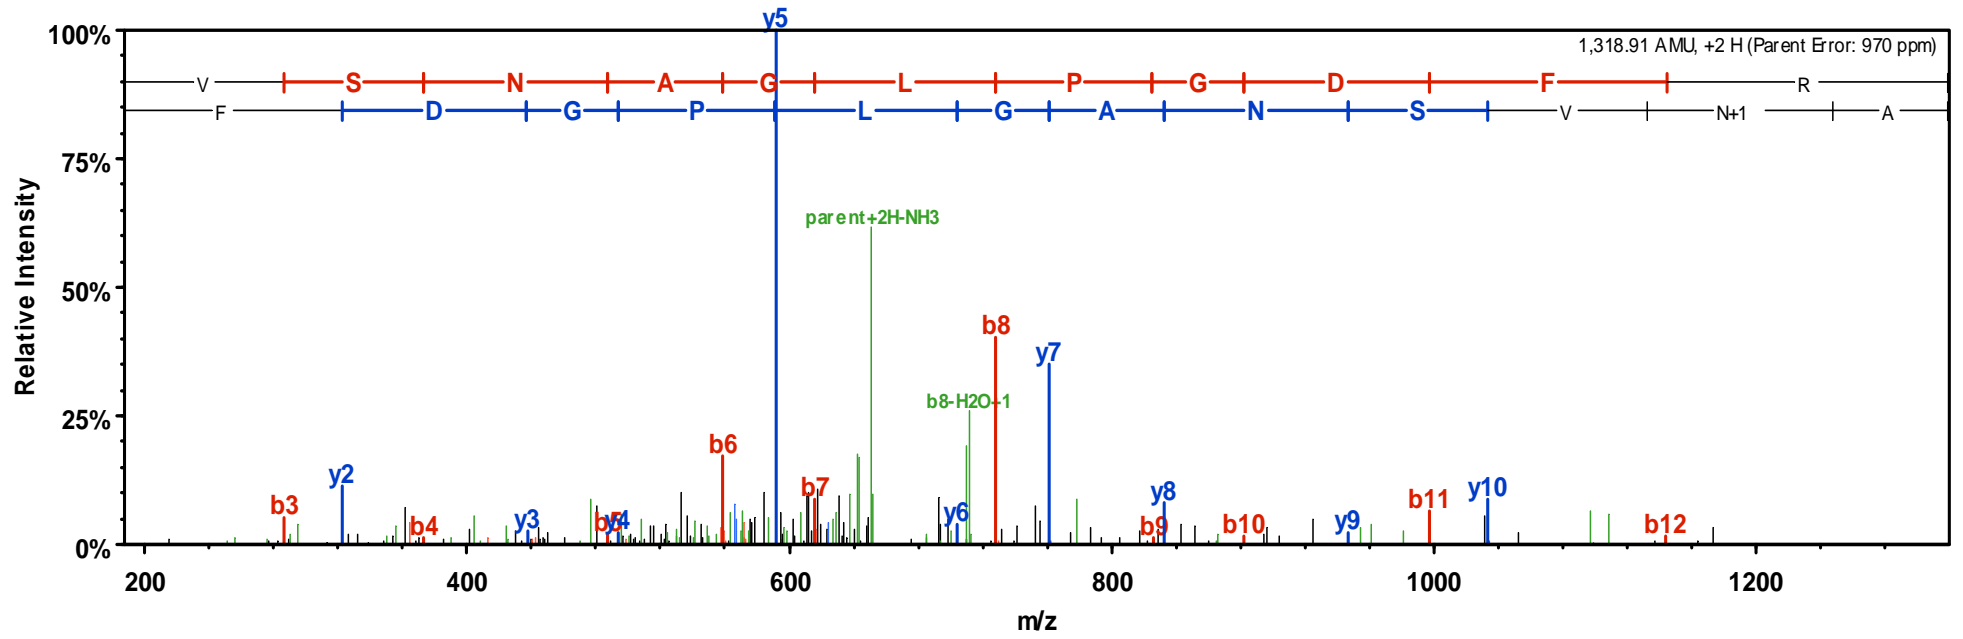

ITA5\_HUMAN

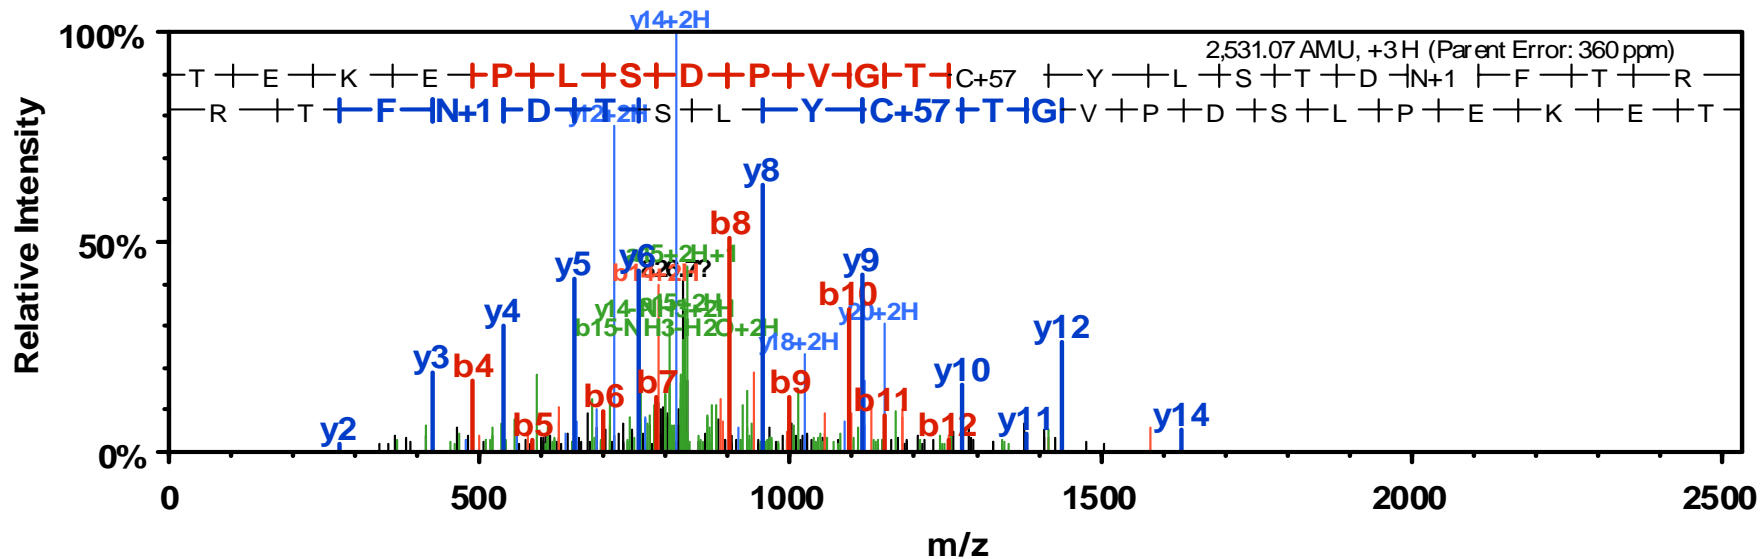

SSRB\_HUMAN

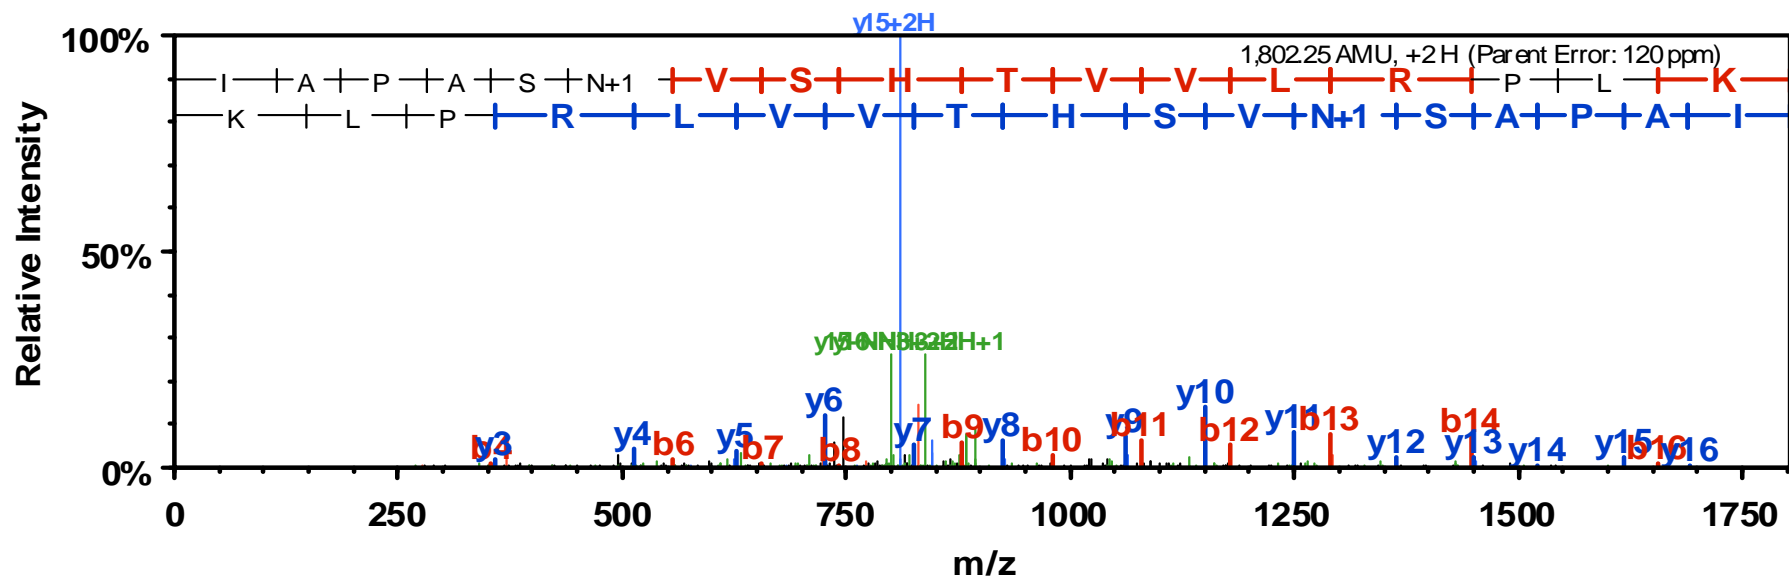

THY1\_HUMAN

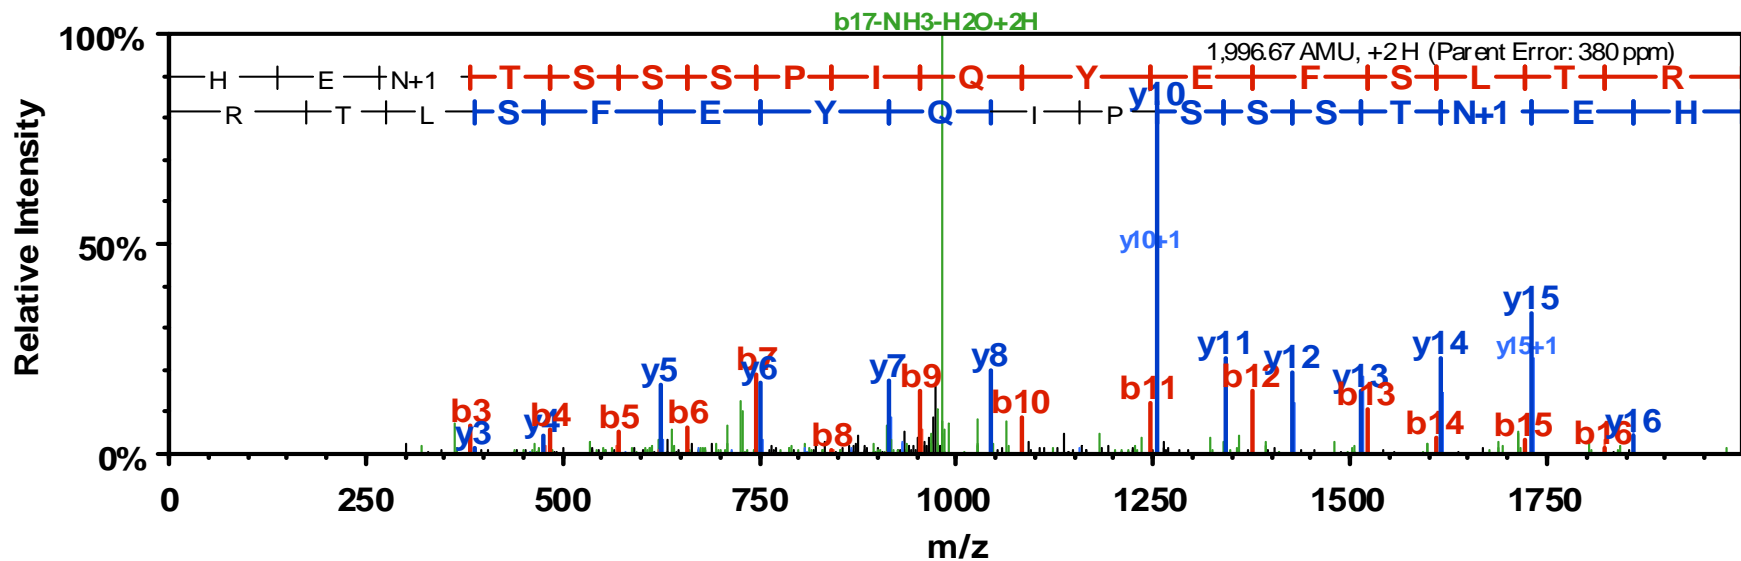

TIMP1\_HUMAN

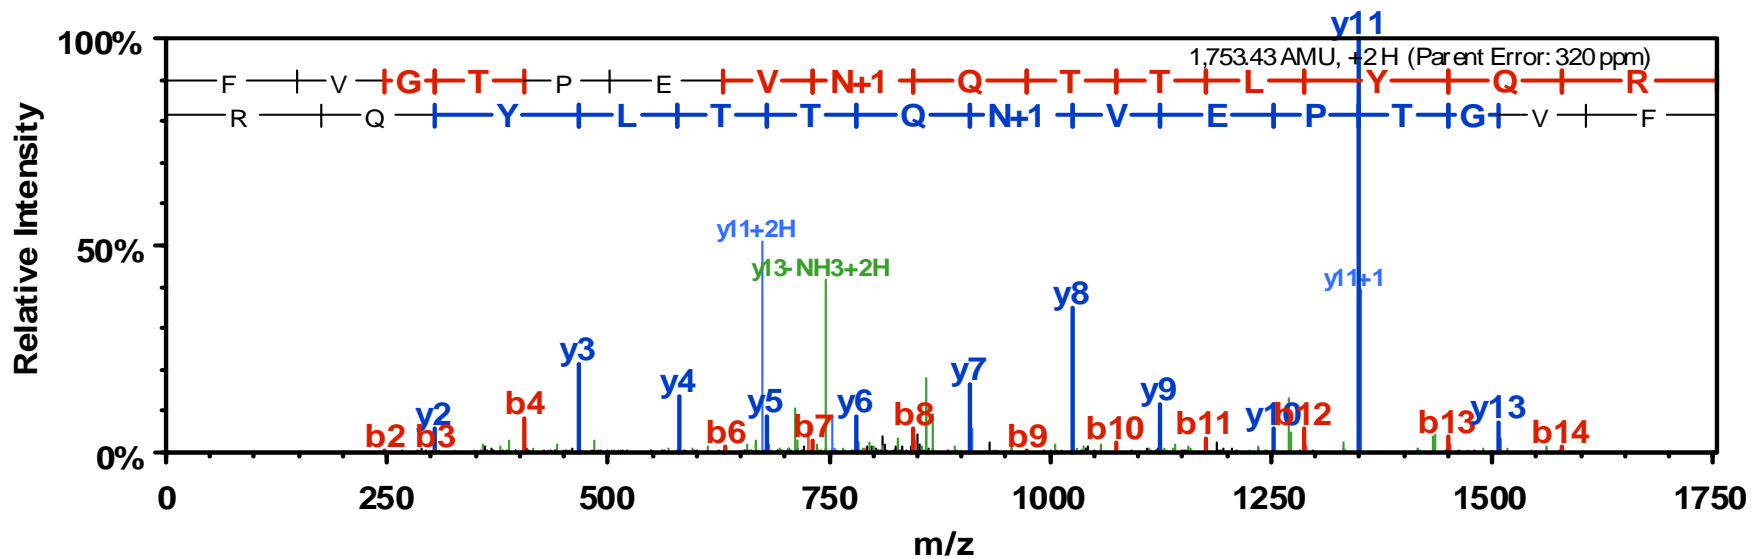



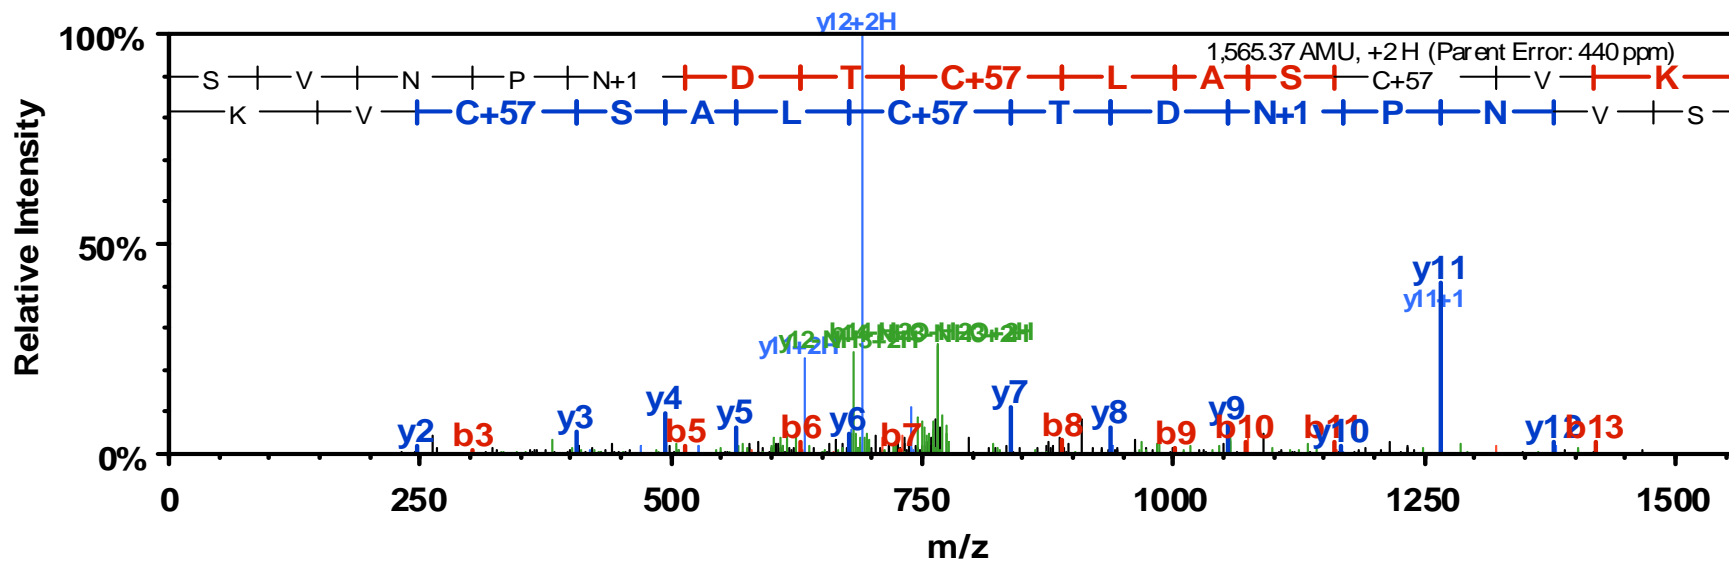

Supplement: NIHMS132564-supplement-1_si_001.pdf [file NIHMS132564-supplement-1_si_001.pdf]
