# Supplementary material
Source: PubMed Central journal article supplement (PMC2735218)
Supplement: NIHMS132564-supplement-2_si_002.pdf [file NIHMS132564-supplement-2_si_002.pdf]

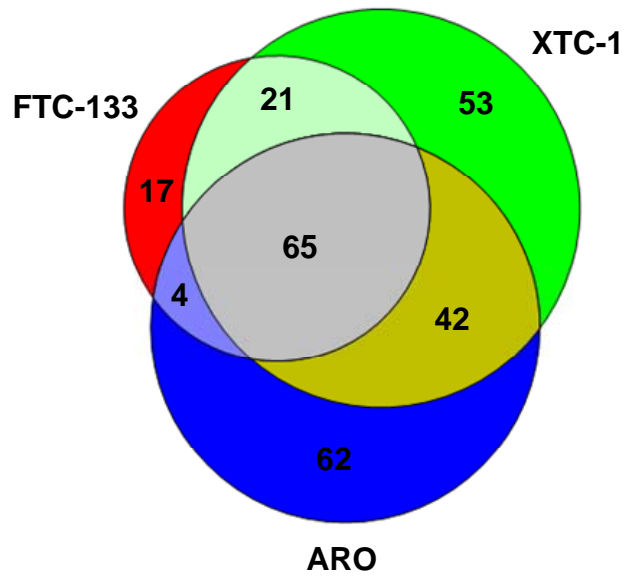

**Supplemental Figure 2A:** Venn Plot of Glycoproteins Profiling of FCT-133, ARO and XTC-1 cells

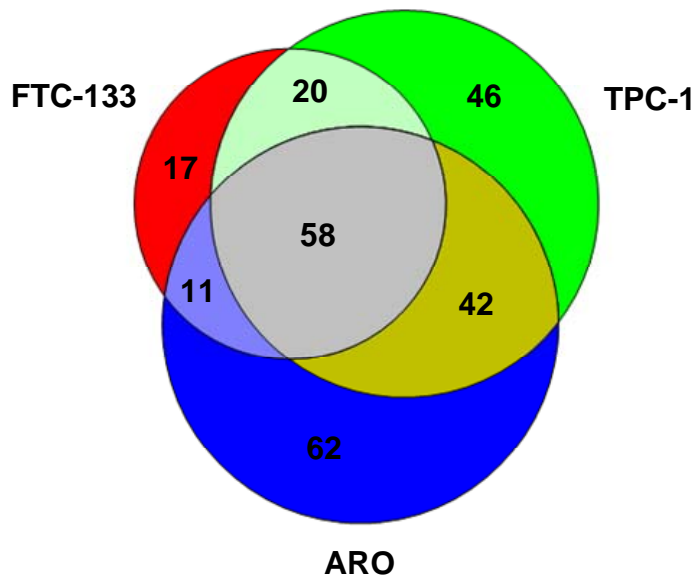

**Supplemental Figure 2B:** Venn Plot of Glycoproteins Profiling of FCT-133, ARO and TPC-1 cells

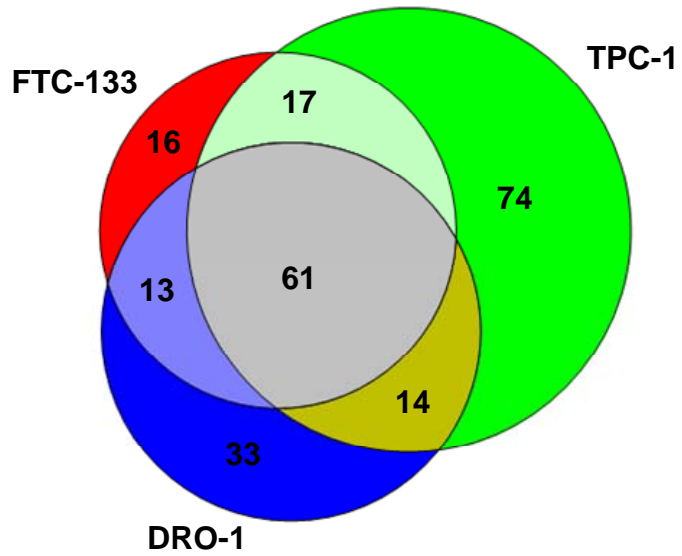

**Supplemental Figure 2C:** Venn Plot of Glycoproteins Profiling of FCT-133, DRO-1 and TPC-1 cells

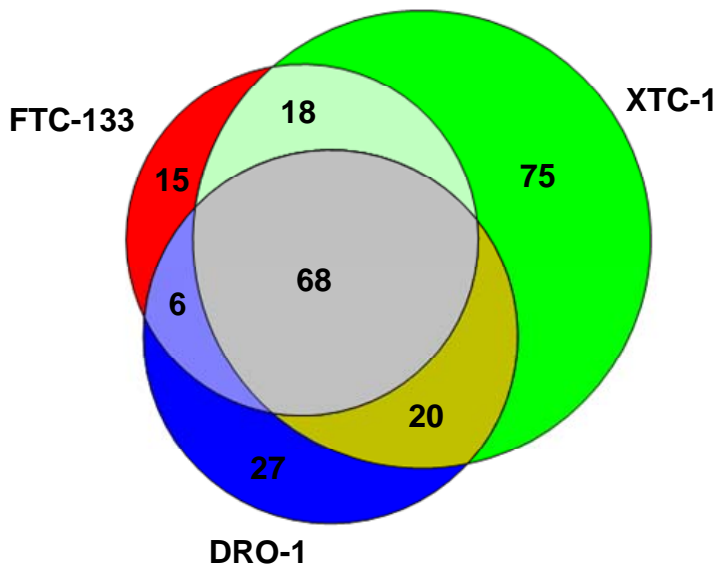

**Supplemental Figure 2D:** Venn Plot of Glycoproteins Profiling of FCT-133, DRO-1 and XTC-1 cells

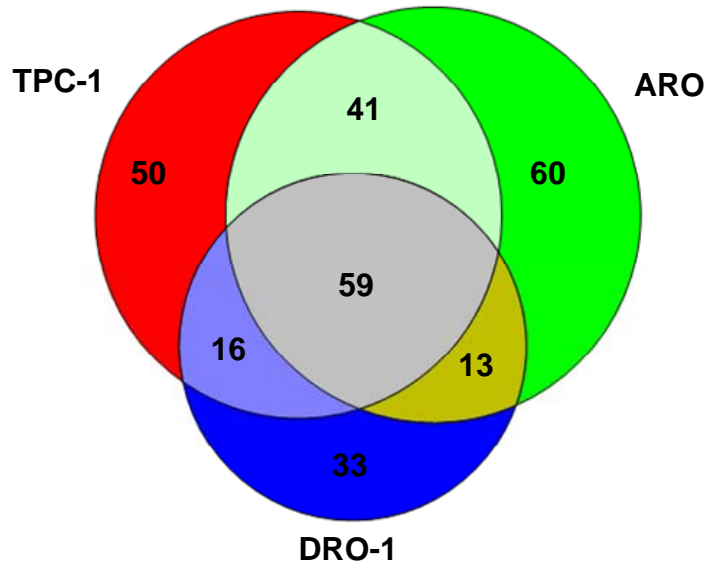

**Supplemental Figure 2E:** Venn Plot of Glycoproteins Profiling of TPC-1, DRO-1 and ARO cells

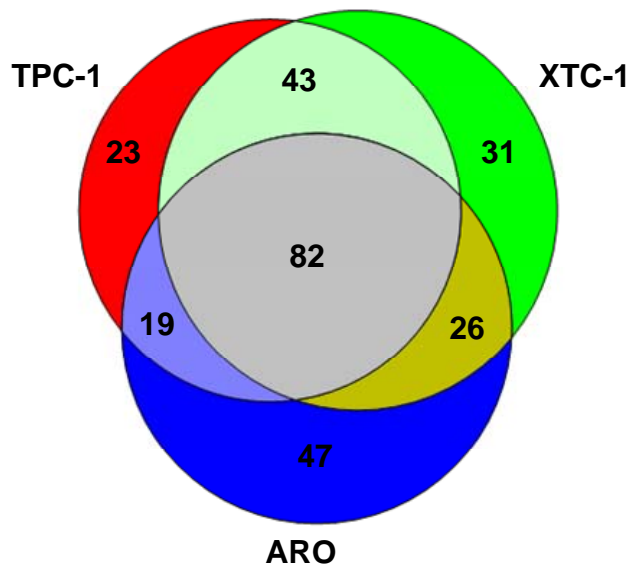

**Supplemental Figure 2F:** Venn Plot of Glycoproteins Profiling of TPC-1, ARO and XTC-1 cells

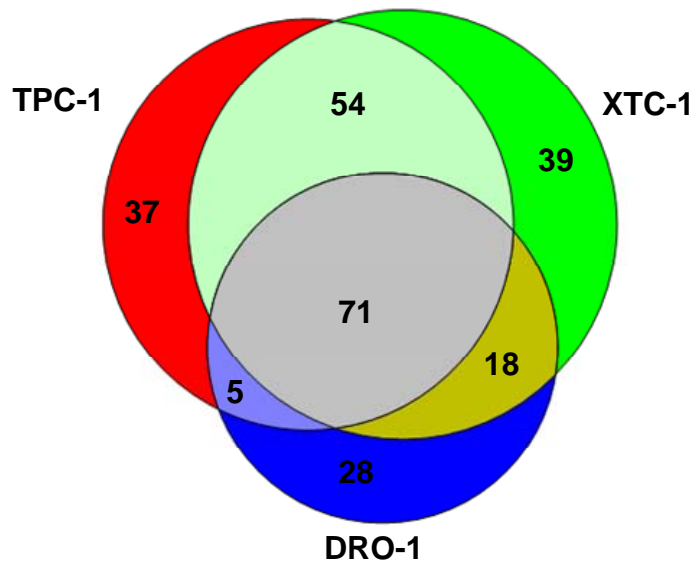

**Supplemental Figure 2G:** Venn Plot of Glycoproteins Profiling of TPC-1, DRO-1 and XTC-1 cells

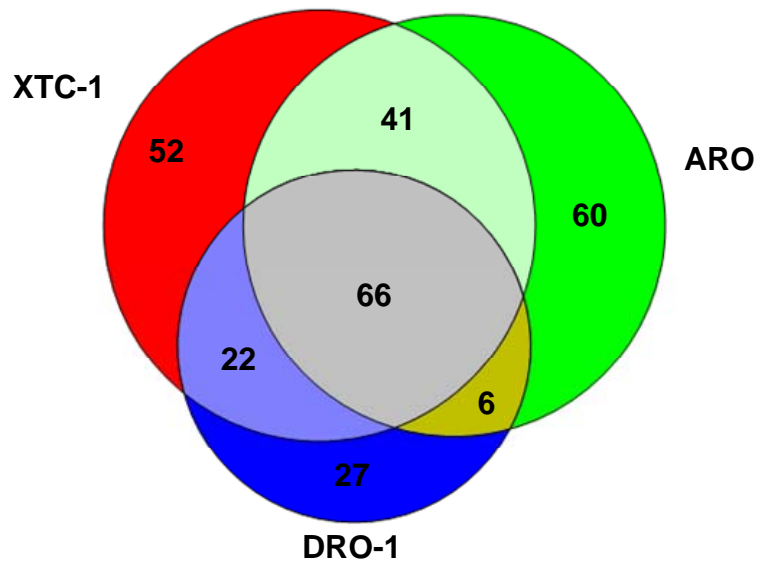

**Supplemental Figure 2H:** Venn Plot of Glycoproteins Profiling of XTC-1, DRO-1 and ARO cells
