# Supplementary material
Source: PubMed Central journal article supplement (PMC2735218)
Supplement: NIHMS132564-supplement-4_si_004.pdf [file NIHMS132564-supplement-4_si_004.pdf]

## Total (Non-Glycosylated and Glycosylated(\*)) Proteins Identified in 5 Thyroid Cancer Cells

| Swiss-Prot Accession Number | Spectra Counts ARO-p65 | Spectra counts ARO-p67 | Spectra Counts DRO-p54 | Spectra Counts DRO-p56 | Spectra Counts XTC1-p13 | Spectra Counts XTC1-p29 | Spectra Counts TPC1-p13 | Spectra Counts TPC1-p15 | Spectra Counts FTC133-p17 | Spectra Counts FTC133-p16 | Protein Name                                                                                                                                                                                                                                          | Subcellular location                                                                                                                                                                                                                                  | Glycosylation | #Trans-membrane regions |
|-----------------------------|------------------------|------------------------|------------------------|------------------------|-------------------------|-------------------------|-------------------------|-------------------------|---------------------------|---------------------------|-------------------------------------------------------------------------------------------------------------------------------------------------------------------------------------------------------------------------------------------------------|-------------------------------------------------------------------------------------------------------------------------------------------------------------------------------------------------------------------------------------------------------|---------------|-------------------------|
| O00115                      | 8                      | 16                     | 42                     | 27                     | 42                      | 64                      | 33                      | 44                      | 12                        | 13                        | Deoxyribonuclease-2-alpha precursor, Deoxyribonuclease II alpha, DNase II alpha, Acid DNase, Lysosomal DNase II, R31240_2                                                                                                                             | Lysosome.                                                                                                                                                                                                                                             | *             | 0                       |
| O14773                      | 92                     | 182                    | 88                     | 57                     | 54                      | 122                     | 72                      | 170                     | 22                        | 13                        | Tripeptidyl-peptidase 1 precursor, Tripeptidyl-peptidase I, TPP-1, TPP-I, Tripeptidyl aminopeptidase, Lysosomal pepstatin-insensitive protease, LPIC, Cell growth-inhibiting gene 1 protein                                                           | Lysosome. Melanosome. Note=Identified by mass spectrometry in melanosome fractions from stage I to stage IV.                                                                                                                                          | *             | 0                       |
| P04062                      | 57                     | 81                     | 32                     | 45                     | 63                      | 135                     | 32                      | 86                      | 23                        | 7                         | Glucosylceramidase precursor, Beta-glucocerebrosidase, Acid beta-glucosidase, D-glucosyl-N-acylsphingosine glucohydrolase, Alglucerase, Imiglucerase                                                                                                  | Lysosome membrane; Peripheral membrane protein; Luminal side. Note=Interaction with saposin-C promotes membrane association.                                                                                                                          | *             | 0                       |
| P06865                      | 108                    | 224                    | 91                     | 109                    | 104                     | 63                      | 141                     | 181                     | 76                        | 74                        | Beta-hexosaminidase subunit alpha precursor, N-acetyl-beta-glucosaminidase subunit alpha, Beta-N-acetylhexosaminidase subunit alpha, Hexosaminidase subunit A                                                                                         | Lysosome.                                                                                                                                                                                                                                             | *             | 0                       |
| P07339                      | 129                    | 270                    | 266                    | 202                    | 424                     | 925                     | 622                     | 1452                    | 344                       | 407                       | Cathepsin D precursor                                                                                                                                                                                                                                 | Lysosome. Melanosome. Note=Identified by mass spectrometry in melanosome fractions from stage I to stage IV.                                                                                                                                          | *             | 0                       |
| P07602                      | 282                    | 411                    | 746                    | 675                    | 499                     | 774                     | 278                     | 718                     | 361                       | 517                       | Proactivator polypeptide precursor                                                                                                                                                                                                                    | Lysosome.                                                                                                                                                                                                                                             | *             | 0                       |
| P07686                      | 101                    | 154                    | 89                     | 121                    | 174                     | 204                     | 143                     | 205                     | 90                        | 91                        | Beta-hexosaminidase subunit beta precursor, N-acetyl-beta-glucosaminidase subunit beta, Beta-N-acetylhexosaminidase subunit beta, Hexosaminidase subunit B, Cervical cancer proto-oncogene 7 protein, HCC-7                                           | Lysosome.                                                                                                                                                                                                                                             | *             | 0                       |
| P07858                      | 48                     | 53                     | 316                    | 147                    | 22                      | 132                     | 176                     | 424                     | 42                        | 100                       | Cathepsin B precursor, Cathepsin B1, APP secretase, APPS                                                                                                                                                                                              | Lysosome. Melanosome. Note=Identified by mass spectrometry in melanosome fractions from stage I to stage IV.                                                                                                                                          | *             | 0                       |
| P10619                      | 59                     | 96                     | 62                     | 37                     | 124                     | 202                     | 124                     | 162                     | 57                        | 56                        | Lysosomal protective protein precursor, Cathepsin A, Carboxypeptidase C, Protective protein for beta-galactosidase                                                                                                                                    | Lysosome.                                                                                                                                                                                                                                             | *             | 0                       |
| P11279                      | 41                     | 31                     | 21                     | 11                     | 74                      | 49                      | 41                      | 88                      | 36                        | 48                        | Lysosome-associated membrane glycoprotein 1 precursor, LAMP-1, CD107a antigen                                                                                                                                                                         | Cell membrane; Single-pass type I membrane protein. Endosome membrane; Single-pass type I membrane protein. Lysosome membrane; Single-pass type I membrane protein. Note=This protein shuttles between lysosomes, endosomes, and the plasma membrane. | *             | 1                       |
| P13987                      | 134                    | 165                    | 277                    | 17                     | 132                     | 353                     | 106                     | 253                     | 26                        | 46                        | CD59 glycoprotein precursor, Membrane attack complex inhibition factor, MACIF, MAC-inhibitory protein, MAC-IP, Protectin, MEM43 antigen, Membrane inhibitor of reactive lysis, MIRL, 20 kDa homologous restriction factor, HRF-20, HRF20, 1F5 antigen | Cell membrane; Lipid-anchor, GPI-anchor. Secreted. Note=Soluble form found in a number of tissues.                                                                                                                                                    | *             | 0                       |
| P14314                      | 104                    | 130                    | 374                    | 53                     | 29                      | 376                     | 208                     | 175                     | 23                        | 138                       | Glucosidase 2 subunit beta precursor, Glucosidase II subunit beta, Protein kinase C substrate, 60.1 kDa protein, heavy chain, PKCSH, 80K-H protein                                                                                                    | Entry not found!                                                                                                                                                                                                                                      | *             | 0                       |
| P15289                      | 7                      | 17                     | 32                     | 34                     | 56                      | 33                      | 92                      | 109                     | 23                        | 40                        | Arylsulfatase A precursor, ASA, Cerebroside-sulfatase                                                                                                                                                                                                 | Lysosome.                                                                                                                                                                                                                                             | *             | 0                       |

Total Protein Identified

|        |     |     |     |     |     |     |     |     |     |     |                                                                                                                                                                                                                                             |                                                                                                                                                                                                                                                  |   |   |
|--------|-----|-----|-----|-----|-----|-----|-----|-----|-----|-----|---------------------------------------------------------------------------------------------------------------------------------------------------------------------------------------------------------------------------------------------|--------------------------------------------------------------------------------------------------------------------------------------------------------------------------------------------------------------------------------------------------|---|---|
| P15586 | 40  | 60  | 56  | 66  | 195 | 182 | 134 | 247 | 108 | 57  | N-acetylglucosamine-6-sulfatase precursor, G6S, Glucosamine-6-sulfatase                                                                                                                                                                     | Lysosome.                                                                                                                                                                                                                                        | * | 0 |
| P16070 | 145 | 104 | 59  | 56  | 39  | 51  | 161 | 185 | 39  | 159 | CD44 antigen precursor, Phagocytic glycoprotein I, PGP-1, HUTCH-I, Extracellular matrix receptor-III, ECMR-III, GP90 lymphocyte homing/adhesion receptor, Hermes antigen, Hyaluronate receptor, Heparan sulfate proteoglycan, Epican, CDw44 | Membrane; Single-pass type I membrane protein.                                                                                                                                                                                                   | * | 1 |
| P16278 | 53  | 98  | 22  | 57  | 69  | 107 | 86  | 67  | 53  | 25  | Beta-galactosidase precursor, Lactase, Acid beta-galactosidase, Elastin receptor 1                                                                                                                                                          | Isoform 1: Lysosome., Isoform 2: Cytoplasm, perinuclear region. Note=Localized to the perinuclear area of the cytoplasm but not to lysosomes.                                                                                                    | * | 0 |
| P50897 | 22  | 43  | 76  | 32  | 12  | 43  | 67  | 188 | 10  | 10  | Palmitoyl-protein thioesterase 1 precursor, PPT-1, Palmitoyl-protein hydrolase 1                                                                                                                                                            | Lysosome.                                                                                                                                                                                                                                        | * | 0 |
| P61916 | 22  | 49  | 25  | 33  | 47  | 154 | 140 | 463 | 55  | 68  | Epididymal secretory protein E1 precursor, Niemann-Pick disease type C2 protein, hE1                                                                                                                                                        | Secreted (Potential).                                                                                                                                                                                                                            | * | 0 |
| Q13510 | 16  | 48  | 39  | 23  | 46  | 34  | 49  | 111 | 29  | 5   | Acid ceramidase precursor, Acylsphingosine deacylase, N-acylsphingosine amidohydrolase, AC, Putative 32 kDa heart protein, PHP32                                                                                                            | Lysosome.                                                                                                                                                                                                                                        | * | 0 |
| Q92820 | 50  | 53  | 101 | 92  | 77  | 141 | 130 | 230 | 20  | 31  | Gamma-glutamyl hydrolase precursor, Gamma-Glu-X carboxypeptidase, Conjugase, GH                                                                                                                                                             | Secreted, extracellular space. Lysosome. Melanosome. Note=While its intracellular location is primarily the lysosome, most of the enzyme activity is secreted. Identified by mass spectrometry in melanosome fractions from stage I to stage IV. | * | 0 |
| Q96HE7 | 147 | 189 | 254 | 193 | 7   | 141 | 153 | 171 | 121 | 290 | ERO1-like protein alpha precursor, ERO1-Lalpha, Oxidoreductin-1-Lalpha, Endoplasmic oxidoreductin-1-like protein, ERO1-L                                                                                                                    | Endoplasmic reticulum membrane; Peripheral membrane protein; Luminal side. Note=The association with TXNDC4 is essential for its retention in the endoplasmic reticulum.                                                                         | * | 0 |
| Q9UBR2 | 13  | 38  | 18  | 55  | 69  | 85  | 216 | 306 | 23  | 34  | Cathepsin Z precursor, Cathepsin X, Cathepsin P                                                                                                                                                                                             | Lysosome.                                                                                                                                                                                                                                        | * | 0 |
| Q9UHL4 | 63  | 116 | 48  | 72  | 50  | 93  | 118 | 195 | 34  | 2   | Dipeptidyl-peptidase 2 precursor, Dipeptidyl-peptidase II, DPP II, Dipeptidyl aminopeptidase II, Quiescent cell proline dipeptidase, Dipeptidyl peptidase 7                                                                                 | Lysosome. Cytoplasmic vesicle.                                                                                                                                                                                                                   | * | 0 |
| Q9Y4L1 | 230 | 468 | 570 | 572 | 27  | 300 | 156 | 143 | 85  | 306 | Hypoxia up-regulated protein 1 precursor, 150 kDa oxygen-regulated protein, Orp150                                                                                                                                                          | Endoplasmic reticulum lumen.                                                                                                                                                                                                                     | * | 0 |
| O00462 |     | 28  |     |     |     |     | 13  | 25  |     |     | Beta-mannosidase precursor, Lysosomal beta A mannosidase, Mannanase, Mannase                                                                                                                                                                | Lysosome.                                                                                                                                                                                                                                        | * | 0 |
| O00468 | 169 | 167 |     |     |     | 104 | 7   | 61  |     | 2   | Agrin precursor                                                                                                                                                                                                                             | Secreted, extracellular space, extracellular matrix. Note=Synaptic basal lamina at the neuromuscular junction (By similarity).                                                                                                                   | * | 0 |
| O00469 |     |     |     |     |     | 14  | 3   |     |     |     | Procollagen-lysine,2-oxoglutarate 5-dioxygenase 2 precursor, Lysyl hydroxylase 2, LH2                                                                                                                                                       | Rough endoplasmic reticulum membrane; Peripheral membrane protein; Luminal side.                                                                                                                                                                 | * | 0 |
| O00584 | 20  | 37  |     | 4   |     | 4   | 108 | 208 |     |     | Ribonuclease T2 precursor, Ribonuclease 6                                                                                                                                                                                                   | Secreted (Potential).                                                                                                                                                                                                                            | * | 0 |
| O00754 | 3   | 5   | 10  | 20  | 11  | 66  | 85  | 36  | 13  |     | Lysosomal alpha-mannosidase precursor, Mannosidase, alpha B, Lysosomal acid alpha-mannosidase, Laman, Mannosidase alpha class 2B member 1                                                                                                   | Lysosome.                                                                                                                                                                                                                                        | * | 0 |

## Total Protein Identified

|        |    |    |    |     |     |    |    |    |     |     |                                                                                                                                                            |                                                                                                                                                                                                                                                                                     |   |    |
|--------|----|----|----|-----|-----|----|----|----|-----|-----|------------------------------------------------------------------------------------------------------------------------------------------------------------|-------------------------------------------------------------------------------------------------------------------------------------------------------------------------------------------------------------------------------------------------------------------------------------|---|----|
| O14672 | 47 | 30 |    |     |     | 21 | 21 | 27 |     |     | ADAM 10 precursor, A disintegrin and metalloproteinase domain 10, Mammalian disintegrin-metalloprotease, Kuzbanian protein homolog, CD156c antigen, CDw156 | Cell membrane; Single-pass type I membrane protein. Intracytoplasmic membrane; Single-pass type I membrane protein. Note=Is localized in the plasma membrane but is predominantly expressed in the Golgi apparatus and in released membrane vesicles derived likely from the Golgi. | * | 1  |
| O14786 |    |    |    |     |     |    |    | 9  |     |     | Neuropilin-1 precursor, Vascular endothelial cell growth factor 165 receptor, CD304 antigen                                                                | Cell membrane; Single-pass type I membrane protein., Isoform 2: Secreted.                                                                                                                                                                                                           | * | 1  |
| O15031 | 21 | 36 |    |     | 6   | 9  | 8  | 14 |     |     | Plexin-B2 precursor, MM1                                                                                                                                   | Membrane; Single-pass type I membrane protein.                                                                                                                                                                                                                                      | * | 1  |
| O15118 |    |    |    |     | 5   |    |    |    |     |     | Niemann-Pick C1 protein precursor                                                                                                                          | Late endosome membrane; Single-pass membrane protein. Lysosome membrane; Single-pass membrane protein.                                                                                                                                                                              | * | 11 |
| O15230 | 2  | 5  |    |     |     | 4  |    | 7  |     |     | Laminin subunit alpha-5 precursor                                                                                                                          | Secreted, extracellular space, extracellular matrix, basement membrane. Note=Major component.                                                                                                                                                                                       | * | 0  |
| O15460 |    |    |    | 4   |     |    |    |    |     |     | Prolyl 4-hydroxylase subunit alpha-2 precursor, 4-PH alpha-2, Procollagen-proline,2-oxoglutarate-4-dioxygenase subunit alpha-2                             | Endoplasmic reticulum lumen.                                                                                                                                                                                                                                                        | * | 0  |
| O43278 | 10 | 23 |    |     |     |    |    |    |     |     | Kunitz-type protease inhibitor 1 precursor, Hepatocyte growth factor activator inhibitor type 1, HAI-1                                                     | Secreted.                                                                                                                                                                                                                                                                           | * | 0  |
| O43490 | 3  | 3  |    |     |     |    |    |    |     |     | Prominin-1 precursor, Prominin-like protein 1, Antigen AC133, CD133 antigen                                                                                | Apical cell membrane; Multi-pass membrane protein (By similarity). Cell projection, microvillus membrane; Multi-pass membrane protein (By similarity).                                                                                                                              | * | 5  |
| O43570 | 19 | 17 |    |     |     | 17 | 6  | 16 |     |     | Carbonic anhydrase 12 precursor, Carbonic anhydrase XII, Carbonate dehydratase XII, CA-XII, Tumor antigen HOM-RCC-3.1.3                                    | Membrane; Single-pass type I membrane protein.                                                                                                                                                                                                                                      | * | 1  |
| O43852 |    |    | 25 | 311 | 136 | 39 |    |    | 116 | 740 | Calumenin precursor, Crocalbin, IEF SSP 9302                                                                                                               | Endoplasmic reticulum lumen. Secreted. Melanosome. Note=Identified by mass spectrometry in melanosome fractions from stage I to stage IV.                                                                                                                                           | * | 0  |
| O60568 |    |    | 39 | 88  |     |    |    |    |     |     | Procollagen-lysine,2-oxoglutarate 5-dioxygenase 3 precursor, Lysyl hydroxylase 3, LH3                                                                      | Rough endoplasmic reticulum membrane; Peripheral membrane protein; Luminal side.                                                                                                                                                                                                    | * | 0  |
| O60635 | 5  |    |    |     |     |    |    |    |     |     | Tetraspanin-1, Tspan-1, Tetraspan NET-1, Tetraspanin TM4-C                                                                                                 | Membrane; Multi-pass membrane protein (Probable).                                                                                                                                                                                                                                   | * | 4  |
| O60637 | 6  |    |    |     |     |    |    |    |     |     | Tetraspanin-3, Tspan-3, Transmembrane 4 superfamily member 8, Tetraspanin TM4-A                                                                            | Membrane; Multi-pass membrane protein (Probable).                                                                                                                                                                                                                                   | * | 4  |
| O75503 | 4  | 5  |    |     |     |    | 8  | 10 |     |     | Ceroid-lipofuscinosis neuronal protein 5 precursor, Protein CLN5                                                                                           | Lysosome.                                                                                                                                                                                                                                                                           | * | 0  |
| O75629 |    |    |    |     |     | 32 | 11 | 32 |     |     | Protein CREG1 precursor, Cellular repressor of E1A-stimulated genes 1                                                                                      | Secreted.                                                                                                                                                                                                                                                                           | * | 0  |
| O75882 |    |    |    |     | 5   |    | 5  |    |     |     | Attractin precursor, Mahogany homolog, DPPT-L                                                                                                              | Isoform 1: Cell membrane; Single-pass type I membrane protein., Isoform 2: Secreted., Isoform 3: Secreted.                                                                                                                                                                          | * | 1  |

Total Protein Identified

|        |     |     |      |      |    |    |     |     |     |                                                                                                                              |                                                                                                                                                                                                                                                                                                                       |                                                                         |   |   |
|--------|-----|-----|------|------|----|----|-----|-----|-----|------------------------------------------------------------------------------------------------------------------------------|-----------------------------------------------------------------------------------------------------------------------------------------------------------------------------------------------------------------------------------------------------------------------------------------------------------------------|-------------------------------------------------------------------------|---|---|
| O75976 | 2   | 4   |      |      | 22 | 37 |     |     |     | Carboxypeptidase D precursor, Metalloprotease D, gp180                                                                       | Membrane; Single-pass type I membrane protein (Potential).                                                                                                                                                                                                                                                            | *                                                                       | 1 |   |
| O94907 |     | 7   |      |      |    |    |     |     |     | Dickkopf-related protein 1 precursor, Dkk-1, Dickkopf-1, hDkk-1, SK                                                          | Secreted.                                                                                                                                                                                                                                                                                                             | *                                                                       | 0 |   |
| O94985 |     |     |      |      |    |    | 2   |     |     | Calsyntenin-1 precursor, Alcadin-alpha, Alc-alpha, Alzheimer-related cadherin-like protein, Non-classical cadherin XB31alpha | Endoplasmic reticulum membrane; Single-pass type I membrane protein. Golgi apparatus membrane. Cell projection. Note=Neurite tips. Localized in the postsynaptic membrane of both excitatory and inhibitory synapses (By similarity). The AlclCD fragment is translocated to the nucleus upon interaction with APBB1. | *                                                                       | 1 |   |
| O95302 |     |     |      |      |    | 5  |     |     |     | FK506-binding protein 9 precursor, Peptidyl-prolyl cis-trans isomerase, PPIase, Rotamase                                     | Endoplasmic reticulum (By similarity).                                                                                                                                                                                                                                                                                | *                                                                       | 0 |   |
| O95858 | 5   |     |      |      |    |    |     |     |     | Tetraspanin-15, Tspan-15, Transmembrane 4 superfamily member 15, Tetraspan NET-7                                             | Membrane; Multi-pass membrane protein (Probable).                                                                                                                                                                                                                                                                     | *                                                                       | 4 |   |
| P00533 |     |     |      |      | 3  | 7  | 6   | 4   |     | Epidermal growth factor receptor precursor, Receptor tyrosine-protein kinase ErbB-1                                          | Cell membrane; Single-pass type I membrane protein., Isoform 2: Secreted.                                                                                                                                                                                                                                             | *                                                                       | 1 |   |
| P00749 |     |     |      |      |    | 12 |     | 15  |     | Urokinase-type plasminogen activator precursor, U-plasminogen activator, uPA                                                 | Secreted.                                                                                                                                                                                                                                                                                                             | *                                                                       | 0 |   |
| P00750 |     |     | 11   |      |    |    |     |     |     | Tissue-type plasminogen activator precursor, t-plasminogen activator, t-PA, tPA, Alteplase, Reteplase                        | Secreted, extracellular space.                                                                                                                                                                                                                                                                                        | *                                                                       | 0 |   |
| P01009 | 101 | 147 |      |      |    |    |     |     |     | Alpha-1-antitrypsin precursor, Alpha-1 protease inhibitor, Alpha-1-antiproteinase                                            | Secreted.                                                                                                                                                                                                                                                                                                             | *                                                                       | 0 |   |
| P01011 |     |     | 3804 | 1960 |    |    | 4   | 11  | 158 | 99                                                                                                                           | Alpha-1-antichymotrypsin precursor, ACT, Cell growth-inhibiting gene 24/25 protein                                                                                                                                                                                                                                    | Secreted.                                                               | * | 0 |
| P01019 | 8   | 11  |      |      |    |    | 18  |     |     |                                                                                                                              | Angiotensinogen precursor, Serpin A8                                                                                                                                                                                                                                                                                  | Secreted.                                                               | * | 0 |
| P01023 | 3   | 11  | 30   | 27   |    |    |     |     |     |                                                                                                                              | Alpha-2-macroglobulin precursor, Alpha-2-M, C3 and PZP-like alpha-2-macroglobulin domain-containing protein 5                                                                                                                                                                                                         | Secreted.                                                               | * | 0 |
| P01024 |     |     |      |      |    |    |     | 5   |     |                                                                                                                              | Complement C3 precursor, C3 and PZP-like alpha-2-macroglobulin domain-containing protein 1                                                                                                                                                                                                                            | Secreted.                                                               | * | 0 |
| P01033 | 9   |     |      |      |    | 25 | 5   | 11  |     |                                                                                                                              | Metalloproteinase inhibitor 1 precursor, TIMP-1, Erythroid-potentiating activity, EPA, Tissue inhibitor of metalloproteinases, Fibroblast collagenase inhibitor, Collagenase inhibitor                                                                                                                                | Secreted.                                                               | * | 0 |
| P01137 | 2   | 6   |      |      |    |    | 5   |     |     |                                                                                                                              | Transforming growth factor beta-1 precursor, TGF-beta-1                                                                                                                                                                                                                                                               | Secreted.                                                               | * | 0 |
| P01892 |     | 3   |      |      |    |    | 4   |     |     |                                                                                                                              | HLA class I histocompatibility antigen, A-2 alpha chain precursor, MHC class I antigen A*2                                                                                                                                                                                                                            | Membrane; Single-pass type I membrane protein.                          | * | 1 |
| P02462 |     |     | 24   |      |    |    | 34  | 12  |     |                                                                                                                              | Collagen alpha-1(IV) chain precursor, Arresten                                                                                                                                                                                                                                                                        | Secreted, extracellular space, extracellular matrix, basement membrane. | * | 0 |
| P02649 | 4   | 7   |      |      |    |    |     |     |     |                                                                                                                              | Apolipoprotein E precursor, Apo-E                                                                                                                                                                                                                                                                                     | Secreted.                                                               | * | 0 |
| P02750 |     | 2   |      |      |    |    |     |     |     |                                                                                                                              | Leucine-rich alpha-2-glycoprotein precursor, LRG                                                                                                                                                                                                                                                                      | Secreted.                                                               | * | 0 |
| P02751 |     |     |      |      |    | 31 | 125 | 408 |     |                                                                                                                              | Fibronectin precursor, FN, Cold-insoluble globulin, CIG                                                                                                                                                                                                                                                               | Secreted, extracellular space, extracellular matrix.                    | * | 0 |
| P02765 |     | 3   |      |      |    |    |     |     |     |                                                                                                                              | Alpha-2-HS-glycoprotein precursor, Fetuin-A, Alpha-2-Z-globulin, Ba-alpha-2-glycoprotein                                                                                                                                                                                                                              | Secreted.                                                               | * | 0 |
| P02768 | 10  | 9   | 12   | 8    | 28 | 8  | 8   | 85  |     | 11                                                                                                                           | Serum albumin precursor                                                                                                                                                                                                                                                                                               | Secreted.                                                               | * | 0 |
| P02771 | 3   |     |      |      |    |    |     |     |     |                                                                                                                              | Alpha-fetoprotein precursor, Alpha-fetoglobulin, Alpha-1-fetoprotein                                                                                                                                                                                                                                                  | Secreted.                                                               | * | 0 |
| P02774 |     | 11  |      |      |    |    |     |     |     |                                                                                                                              | Vitamin D-binding protein precursor, DBP, Group-specific component, Gc-globulin, VDB                                                                                                                                                                                                                                  | Secreted.                                                               | * | 0 |

Total Protein Identified

|        |    |    |     |    |    |     |  |  |    |                                                                                     |                                                                                                                                                                                                                |                                                                                                                                                                         |   |   |
|--------|----|----|-----|----|----|-----|--|--|----|-------------------------------------------------------------------------------------|----------------------------------------------------------------------------------------------------------------------------------------------------------------------------------------------------------------|-------------------------------------------------------------------------------------------------------------------------------------------------------------------------|---|---|
| P02786 |    | 7  |     |    |    |     |  |  |    | Transferrin receptor protein 1, Tfr1, TR, Tfr, Trfr, CD71 antigen, T9, p90          | Cell membrane; Single-pass type II membrane protein. Melanosome. Note=Identified by mass spectrometry in melanosome fractions from stage I to stage IV., Transferrin receptor protein 1, serum form: Secreted. | *                                                                                                                                                                       | 1 |   |
| P02787 |    |    | 273 | 56 |    |     |  |  |    | Serotransferrin precursor, Transferrin, Siderophilin, Beta-1-metal-binding globulin | Secreted.                                                                                                                                                                                                      | *                                                                                                                                                                       | 0 |   |
| P04004 | 11 | 8  | 8   | 10 |    | 9   |  |  | 9  | Vitronectin precursor, Serum-spreading factor, S-protein, V75                       | Secreted, extracellular space.                                                                                                                                                                                 | *                                                                                                                                                                       | 0 |   |
| P04216 |    |    |     |    | 97 | 268 |  |  | 90 | 147                                                                                 | Thy-1 membrane glycoprotein precursor, Thy-1 antigen, CD90 antigen, CDw90                                                                                                                                      | Cell membrane; Lipid-anchor, GPI-anchor (By similarity).                                                                                                                | * | 0 |
| P04233 |    |    |     |    | 11 | 31  |  |  |    |                                                                                     | HLA class II histocompatibility antigen gamma chain, HLA-DR antigens-associated invariant chain, Ia antigen-associated invariant chain, li, p33, CD74 antigen                                                  | Membrane; Single-pass type II membrane protein (Potential).                                                                                                             | * | 1 |
| P04439 |    |    |     |    |    |     |  |  |    | 12                                                                                  | HLA class I histocompatibility antigen, A-3 alpha chain precursor, MHC class I antigen A*3                                                                                                                     | Membrane; Single-pass type I membrane protein.                                                                                                                          | * | 1 |
| P04843 |    |    |     |    | 2  |     |  |  |    |                                                                                     | Dolichyl-diphosphooligosaccharide--protein glycosyltransferase subunit 1 precursor, Dolichyl-diphosphooligosaccharide--protein glycosyltransferase 67 kDa subunit, Ribophorin-1, Ribophorin I, RPN-I           | Endoplasmic reticulum membrane; Single-pass type I membrane protein. Melanosome. Note=Identified by mass spectrometry in melanosome fractions from stage I to stage IV. | * | 1 |
| P04844 |    |    | 11  | 15 | 2  |     |  |  |    | 6                                                                                   | Dolichyl-diphosphooligosaccharide--protein glycosyltransferase subunit 2 precursor, Dolichyl-diphosphooligosaccharide--protein glycosyltransferase 63 kDa subunit, Ribophorin-2, Ribophorin II, RPN-II, RIBIIR | Endoplasmic reticulum membrane; Multi-pass membrane protein (Potential).                                                                                                | * | 3 |
| P05026 | 13 | 14 |     |    | 6  | 12  |  |  |    |                                                                                     | Sodium/potassium-transporting ATPase subunit beta-1, Sodium/potassium-dependent ATPase subunit beta-1                                                                                                          | Membrane; Single-pass type II membrane protein.                                                                                                                         | * | 1 |

Total Protein Identified

|        |    |    |    |    |    |     |     |     |     |                                                                                                                                                                 |                                                                                                                                                                                                                                                                                                                                                                                                                                                                                                                                                                                                                                                                                                                                                                                                                                                                                                                                |   |   |
|--------|----|----|----|----|----|-----|-----|-----|-----|-----------------------------------------------------------------------------------------------------------------------------------------------------------------|--------------------------------------------------------------------------------------------------------------------------------------------------------------------------------------------------------------------------------------------------------------------------------------------------------------------------------------------------------------------------------------------------------------------------------------------------------------------------------------------------------------------------------------------------------------------------------------------------------------------------------------------------------------------------------------------------------------------------------------------------------------------------------------------------------------------------------------------------------------------------------------------------------------------------------|---|---|
| P05067 | 5  | 5  |    |    |    |     | 6   |     |     | Amyloid beta A4 protein precursor, APP, ABPP, Alzheimer disease amyloid protein, Cerebral vascular amyloid peptide, CVAP, Protease nexin-II, PN-II, APPI, PreA4 | Membrane; Single-pass type I membrane protein. Note=Cell surface protein that rapidly becomes internalized via clathrin-coated pits. During maturation, the immature APP (N-glycosylated in the endoplasmic reticulum) moves to the Golgi complex where complete maturation occurs (O-glycosylated and sulfated). After alpha-secretase cleavage, soluble APP is released into the extracellular space and the C-terminal is internalized to endosomes and lysosomes. Some APP accumulates in secretory transport vesicles leaving the late Golgi compartment and returns to the cell surface. Gamma-CTF(59) peptide is located to both the cytoplasm and nuclei of neurons. It can be translocated to the nucleus through association with Fe65. Beta-APP42 associates with FRPL1 at the cell surface and the complex is then rapidly internalized. APP sorts to the basolateral surface in epithelial cells. During neuronal | * | 1 |
| P05090 |    |    | 5  |    |    |     |     |     |     | Apolipoprotein D precursor, Apo-D, ApoD                                                                                                                         | Secreted.                                                                                                                                                                                                                                                                                                                                                                                                                                                                                                                                                                                                                                                                                                                                                                                                                                                                                                                      | * | 0 |
| P05106 |    |    |    |    | 2  | 21  | 123 | 123 |     | Integrin beta-3 precursor, Platelet membrane glycoprotein IIIa, GPIIIa, CD61 antigen                                                                            | Membrane; Single-pass type I membrane protein.                                                                                                                                                                                                                                                                                                                                                                                                                                                                                                                                                                                                                                                                                                                                                                                                                                                                                 | * | 1 |
| P05362 | 10 | 22 | 77 | 10 | 51 | 85  | 25  | 53  |     | Intercellular adhesion molecule 1 precursor, ICAM-1, Major group rhinovirus receptor, CD54 antigen                                                              | Membrane; Single-pass type I membrane protein.                                                                                                                                                                                                                                                                                                                                                                                                                                                                                                                                                                                                                                                                                                                                                                                                                                                                                 | * | 1 |
| P05556 | 66 | 50 |    |    | 24 | 103 | 306 | 452 | 113 | Integrin beta-1 precursor, Fibronectin receptor subunit beta, Integrin VLA-4 subunit beta, CD29 antigen                                                         | Cell membrane; Single-pass type I membrane protein. Melanosome. Note=Isoform beta-1B does not localize to focal adhesions. Highly enriched in stage I melanosomes.                                                                                                                                                                                                                                                                                                                                                                                                                                                                                                                                                                                                                                                                                                                                                             | * | 1 |
| P05783 |    |    |    |    | 46 |     |     |     |     | Keratin, type I cytoskeletal 18, Cytokeratin-18, CK-18, Keratin-18, K18, Cell proliferation-inducing gene 46 protein                                            | Cytoplasm, perinuclear region.                                                                                                                                                                                                                                                                                                                                                                                                                                                                                                                                                                                                                                                                                                                                                                                                                                                                                                 | * | 0 |
| P05997 |    |    |    |    |    |     | 10  | 9   |     | Collagen alpha-2(V) chain precursor                                                                                                                             | Secreted, extracellular space, extracellular matrix (By similarity).                                                                                                                                                                                                                                                                                                                                                                                                                                                                                                                                                                                                                                                                                                                                                                                                                                                           | * | 0 |
| P06276 |    |    |    |    | 10 | 54  |     |     |     | Cholinesterase precursor, Acylcholine acylhydrolase, Choline esterase II, Butyrylcholine esterase, Pseudocholinesterase                                         | Entry not found!                                                                                                                                                                                                                                                                                                                                                                                                                                                                                                                                                                                                                                                                                                                                                                                                                                                                                                               | * | 0 |
| P06280 | 3  | 7  |    |    | 4  |     | 19  |     |     | Alpha-galactosidase A precursor, Melibiase, Alpha-D-galactoside galactohydrolase, Alpha-D-galactosidase A, Agalsidase                                           | Lysosome.                                                                                                                                                                                                                                                                                                                                                                                                                                                                                                                                                                                                                                                                                                                                                                                                                                                                                                                      | * | 0 |
| P06756 | 83 | 45 | 62 | 4  | 51 | 118 | 292 | 350 | 49  | Integrin alpha-V precursor, Vitronectin receptor subunit alpha, CD51 antigen                                                                                    | Membrane; Single-pass type I membrane protein.                                                                                                                                                                                                                                                                                                                                                                                                                                                                                                                                                                                                                                                                                                                                                                                                                                                                                 | * | 1 |
| P07093 |    |    |    | 10 |    |     |     |     |     | Glia-derived nexin precursor, GDN, Protease nexin I, PN-1, Protease inhibitor 7                                                                                 | Secreted, extracellular space.                                                                                                                                                                                                                                                                                                                                                                                                                                                                                                                                                                                                                                                                                                                                                                                                                                                                                                 | * | 0 |
| P07225 |    | 11 |    |    |    | 6   |     |     |     | Vitamin K-dependent protein S precursor                                                                                                                         | Secreted.                                                                                                                                                                                                                                                                                                                                                                                                                                                                                                                                                                                                                                                                                                                                                                                                                                                                                                                      | * | 0 |
| P07711 |    |    | 93 | 27 | 20 | 135 | 15  | 55  | 13  | Cathepsin L1 precursor, Major excreted protein, MEP                                                                                                             | Lysosome.                                                                                                                                                                                                                                                                                                                                                                                                                                                                                                                                                                                                                                                                                                                                                                                                                                                                                                                      | * | 0 |

## Total Protein Identified

|        |    |    |     |     |    |    |    |    |    |     |                                                              |                                                                                                                                                                                       |                                                                                                                                                                                                                        |   |   |
|--------|----|----|-----|-----|----|----|----|----|----|-----|--------------------------------------------------------------|---------------------------------------------------------------------------------------------------------------------------------------------------------------------------------------|------------------------------------------------------------------------------------------------------------------------------------------------------------------------------------------------------------------------|---|---|
| P07942 | 12 | 52 | 151 | 104 |    | 32 | 45 | 55 | 65 | 147 | Laminin subunit beta-1 precursor, Laminin B1 chain           | Secreted, extracellular space, extracellular matrix, basement membrane. Note=Major component.                                                                                         | *                                                                                                                                                                                                                      | 0 |   |
| P07996 |    |    |     |     |    |    | 36 | 23 |    |     | Thrombospondin-1 precursor                                   | Entry not found!                                                                                                                                                                      | *                                                                                                                                                                                                                      | 0 |   |
| P08123 |    |    |     |     |    |    |    |    |    | 4   | Collagen alpha-2(I) chain precursor, Alpha-2 type I collagen | Secreted, extracellular space, extracellular matrix (By similarity).                                                                                                                  | *                                                                                                                                                                                                                      | 0 |   |
| P08174 | 4  | 2  | 48  | 14  | 3  | 23 |    |    |    | 2   | 16                                                           | Complement decay-accelerating factor precursor, CD55 antigen                                                                                                                          | Isoform 1: Membrane; Single-pass type I membrane protein., Isoform 2: Cell membrane; Lipid-anchor, GPI-anchor.                                                                                                         | * | 0 |
| P08195 | 26 | 51 | 24  | 8   | 21 | 19 | 14 | 10 |    |     |                                                              | 4F2 cell-surface antigen heavy chain, 4F2hc, Lymphocyte activation antigen 4F2 large subunit, 4F2 heavy chain antigen, CD98 antigen                                                   | Membrane; Single-pass type II membrane protein. Melanosome. Note=Identified by mass spectrometry in melanosome fractions from stage I to stage IV.                                                                     | * | 1 |
| P08236 | 36 | 35 | 35  |     | 4  |    | 15 | 16 |    |     |                                                              | Beta-glucuronidase precursor, Beta-G1                                                                                                                                                 | Lysosome.                                                                                                                                                                                                              | * | 0 |
| P08294 |    |    | 54  | 30  |    |    |    |    |    |     |                                                              | Extracellular superoxide dismutase [Cu-Zn] precursor, EC-SOD                                                                                                                          | Secreted, extracellular space. Note=99% of EC-SOD is anchored to heparan sulfate proteoglycans in the tissue interstitium, and 1% is located in the vasculature in equilibrium between the plasma and the endothelium. | * | 0 |
| P08571 |    |    |     |     | 43 | 84 |    |    |    |     |                                                              | Monocyte differentiation antigen CD14 precursor, Myeloid cell-specific leucine-rich glycoprotein                                                                                      | Cell membrane; Lipid-anchor, GPI-anchor.                                                                                                                                                                               | * | 0 |
| P08572 |    |    | 49  | 15  |    |    | 10 | 20 | 6  | 8   |                                                              | Collagen alpha-2(IV) chain precursor                                                                                                                                                  | Secreted, extracellular space, extracellular matrix, basement membrane.                                                                                                                                                | * | 0 |
| P08581 |    |    |     |     |    | 8  | 2  |    |    |     |                                                              | Hepatocyte growth factor receptor precursor, HGF receptor, Scatter factor receptor, SF receptor, HGF/SF receptor, Met proto-oncogene tyrosine kinase, c-Met                           | Membrane; Single-pass type I membrane protein.                                                                                                                                                                         | * | 1 |
| P08582 |    |    | 11  | 12  | 27 | 74 |    |    |    |     |                                                              | Melanotransferrin precursor, Melanoma-associated antigen p97, CD228 antigen                                                                                                           | Isoform 1: Cell membrane; Lipid-anchor, GPI-anchor.                                                                                                                                                                    | * | 0 |
| P08648 |    |    |     |     | 10 | 21 | 28 | 20 |    | 58  |                                                              | Integrin alpha-5 precursor, Fibronectin receptor subunit alpha, Integrin alpha-F, VLA-5, CD49e antigen                                                                                | Membrane; Single-pass type I membrane protein.                                                                                                                                                                         | * | 1 |
| P08962 | 23 | 10 | 26  |     | 27 | 63 |    |    |    | 17  |                                                              | CD63 antigen, Melanoma-associated antigen ME491, Ocular melanoma-associated antigen, OMA81H, Granulophysin, Tetraspanin-30, Tspan-30, Lysosomal-associated membrane protein 3, Lamp-3 | Cell membrane; Multi-pass membrane protein. Lysosome membrane; Multi-pass membrane protein. Late endosome membrane; Multi-pass membrane protein. Note=Also found in Weibel-Palade bodies of endothelial cells.         | * | 4 |
| P09486 |    |    | 25  | 87  | 35 | 59 |    |    |    |     |                                                              | SPARC precursor, Secreted protein acidic and rich in cysteine, Osteonectin, ON, Basement-membrane protein 40, BM-40                                                                   | Secreted, extracellular space, extracellular matrix, basement membrane. Note=In or around the basement membrane.                                                                                                       | * | 0 |
| P09603 |    |    |     |     |    | 10 |    |    |    |     |                                                              | Macrophage colony-stimulating factor 1 precursor, CSF-1, MCSF, M-CSF, Lanimostim                                                                                                      | Cell membrane; Single-pass membrane protein (By similarity)., Processed macrophage colony-stimulating factor 1: Secreted, extracellular space (By similarity).                                                         | * | 1 |
| P09668 | 43 | 94 |     | 8   | 13 | 34 |    |    |    |     |                                                              | Cathepsin H precursor                                                                                                                                                                 | Lysosome.                                                                                                                                                                                                              | * | 0 |

## Total Protein Identified

|        |     |     |     |     |     |     |     |     |    |     |                                                                                                                                                                                                                                                                                                  |                                                                                                                                                                                                                                                                                                                                                                                                  |   |    |
|--------|-----|-----|-----|-----|-----|-----|-----|-----|----|-----|--------------------------------------------------------------------------------------------------------------------------------------------------------------------------------------------------------------------------------------------------------------------------------------------------|--------------------------------------------------------------------------------------------------------------------------------------------------------------------------------------------------------------------------------------------------------------------------------------------------------------------------------------------------------------------------------------------------|---|----|
| P0C0L5 |     |     |     |     |     | 26  |     |     |    |     | Complement C4-B precursor, Basic complement C4, C3 and PZP-like alpha-2-macroglobulin domain-containing protein 3                                                                                                                                                                                | Secreted.                                                                                                                                                                                                                                                                                                                                                                                        | * | 0  |
| P10253 | 247 | 331 |     | 199 | 130 | 233 | 195 | 286 | 4  | 15  | Lysosomal alpha-glucosidase precursor, Acid maltase, Aglucosidase alfa                                                                                                                                                                                                                           | Lysosome.                                                                                                                                                                                                                                                                                                                                                                                        | * | 0  |
| P10586 |     | 2   |     |     |     |     |     |     |    |     | Receptor-type tyrosine-protein phosphatase F precursor, LAR protein, Leukocyte antigen related                                                                                                                                                                                                   | Membrane; Single-pass type I membrane protein.                                                                                                                                                                                                                                                                                                                                                   | * | 1  |
| P10646 | 4   | 4   |     |     |     |     |     |     |    |     | Tissue factor pathway inhibitor precursor, TFPI, Lipoprotein-associated coagulation inhibitor, LACI, Extrinsic pathway inhibitor, EPI                                                                                                                                                            | Secreted.                                                                                                                                                                                                                                                                                                                                                                                        | * | 0  |
| P10909 |     | 4   |     |     | 12  | 14  |     |     |    |     | Clusterin precursor, Complement-associated protein SP-40,40, Complement cytolytic inhibitor, CLI, NA1/NA2, Apolipoprotein J, Apo-J, Testosterone-repressed prostate message 2, TRPM-2, Ku70-binding protein 1                                                                                    | Secreted.                                                                                                                                                                                                                                                                                                                                                                                        | * | 0  |
| P10915 |     |     | 153 | 20  |     |     |     |     |    |     | Hyaluronan and proteoglycan link protein 1 precursor, Proteoglycan link protein, Cartilage link protein, LP                                                                                                                                                                                      | Secreted, extracellular space, extracellular matrix.                                                                                                                                                                                                                                                                                                                                             | * | 0  |
| P11047 |     |     | 95  | 81  |     | 51  | 59  | 37  | 18 | 40  | Laminin subunit gamma-1 precursor, Laminin B2 chain                                                                                                                                                                                                                                              | Secreted, extracellular space, extracellular matrix, basement membrane.                                                                                                                                                                                                                                                                                                                          | * | 0  |
| P11117 | 19  | 22  | 6   |     | 10  | 17  | 10  | 35  | 13 |     | Lysosomal acid phosphatase precursor, LAP                                                                                                                                                                                                                                                        | Lysosome.                                                                                                                                                                                                                                                                                                                                                                                        | * | 0  |
| P11166 | 44  | 16  |     |     |     |     | 5   |     |    | 22  | Solute carrier family 2, facilitated glucose transporter member 1, Glucose transporter type 1, erythrocyte/brain, GLUT-1, HepG2 glucose transporter                                                                                                                                              | Cell membrane; Multi-pass membrane protein (By similarity). Melanosome. Note=Localizes primarily at the cell surface (By similarity). Identified by mass spectrometry in melanosome fractions from stage I to stage IV.                                                                                                                                                                          | * | 12 |
| P11717 | 12  | 37  | 4   |     | 3   | 7   | 8   | 41  |    | 15  | Cation-independent mannose-6-phosphate receptor precursor, CI Man-6-P receptor, CI-MPR, M6PR, Insulin-like growth factor 2 receptor, Insulin-like growth factor II receptor, IGF-II receptor, M6P/IGF2 receptor, M6P/IGF2R, 300 kDa mannose 6-phosphate receptor, MPR 300, MPR300, CD222 antigen | Lysosome membrane; Single-pass type I membrane protein.                                                                                                                                                                                                                                                                                                                                          | * | 1  |
| P12109 |     |     | 67  | 24  |     | 64  | 6   | 34  | 76 | 246 | Collagen alpha-1(VI) chain precursor                                                                                                                                                                                                                                                             | Secreted, extracellular space, extracellular matrix (By similarity).                                                                                                                                                                                                                                                                                                                             | * | 0  |
| P12110 |     |     |     |     |     |     |     | 3   |    | 6   | Collagen alpha-2(VI) chain precursor                                                                                                                                                                                                                                                             | Secreted, extracellular space, extracellular matrix. Membrane; Peripheral membrane protein. Note=Recruited on membranes by CSPG4.                                                                                                                                                                                                                                                                | * | 0  |
| P12830 | 9   | 56  |     |     |     | 12  |     |     |    |     | Epithelial cadherin precursor, E-cadherin, Uvomorulin, Cadherin-1, CAM 120/80, CD324 antigen                                                                                                                                                                                                     | Cell junction. Cell membrane; Single-pass type I membrane protein. Note=Colocalizes with DLG7 at sites of cell-cell contact in intestinal epithelial cells. Anchored to actin microfilaments through association with alpha-, beta- and gamma-catenin. Sequential proteolysis induced by apoptosis or calcium influx, results in translocation from sites of cell-cell contact to the cytoplasm. | * | 1  |
| P13284 | 19  | 27  | 11  |     | 30  | 60  | 15  |     | 10 | 10  | Gamma-interferon-inducible lysosomal thiol reductase precursor, Gamma-interferon-inducible protein IP-30                                                                                                                                                                                         | Lysosome.                                                                                                                                                                                                                                                                                                                                                                                        | * | 0  |



Total Protein Identified

|        |    |    |     |     |    |    |    |     |    |     |                                                                                                                                                                |                                                                                                                                                                                                                                                                                                                                                                                    |   |   |
|--------|----|----|-----|-----|----|----|----|-----|----|-----|----------------------------------------------------------------------------------------------------------------------------------------------------------------|------------------------------------------------------------------------------------------------------------------------------------------------------------------------------------------------------------------------------------------------------------------------------------------------------------------------------------------------------------------------------------|---|---|
| P13473 | 54 | 43 | 31  | 11  | 58 | 20 | 12 | 44  | 20 |     | Lysosome-associated membrane glycoprotein 2 precursor, LAMP-2, CD107b antigen                                                                                  | Cell membrane; Single-pass type I membrane protein. Endosome membrane; Single-pass type I membrane protein. Lysosome membrane; Single-pass type I membrane protein. Note=This protein shuttles between lysosomes, endosomes, and the plasma membrane.                                                                                                                              | * | 1 |
| P13591 |    |    |     |     | 11 | 33 | 12 | 41  |    | 11  | Neural cell adhesion molecule 1, 140 kDa isoform precursor, N-CAM 140, NCAM-140, CD56 antigen                                                                  | Cell membrane; Single-pass type I membrane protein.                                                                                                                                                                                                                                                                                                                                | * | 1 |
| P13611 |    |    | 24  | 19  |    | 23 | 72 | 147 |    |     | Versican core protein precursor, Large fibroblast proteoglycan, Chondroitin sulfate proteoglycan core protein 2, PG-M, Glial hyaluronate-binding protein, GHAP | Secreted, extracellular space, extracellular matrix.                                                                                                                                                                                                                                                                                                                               | * | 0 |
| P13674 |    |    |     |     |    |    |    |     |    | 13  | Prolyl 4-hydroxylase subunit alpha-1 precursor, 4-PH alpha-1, Procollagen-proline,2-oxoglutarate-4-dioxygenase subunit alpha-1                                 | Endoplasmic reticulum lumen.                                                                                                                                                                                                                                                                                                                                                       | * | 0 |
| P14384 |    |    |     |     |    | 14 |    | 6   |    |     | Carboxypeptidase M precursor, CPM                                                                                                                              | Cell membrane; Lipid-anchor, GPI-anchor.                                                                                                                                                                                                                                                                                                                                           | * | 0 |
| P14625 | 10 | 23 | 250 | 120 | 34 | 18 |    |     | 14 | 127 | Endoplasmic precursor, Heat shock protein 90 kDa beta member 1, 94 kDa glucose-regulated protein, GRP94, gp96 homolog, Tumor rejection antigen 1               | Endoplasmic reticulum lumen. Melanosome. Note=Identified by mass spectrometry in melanosome fractions from stage I to stage IV.                                                                                                                                                                                                                                                    | * | 0 |
| P15151 | 5  | 7  |     |     |    |    |    |     |    |     | Poliovirus receptor precursor, Nectin-like protein 5, Necl-5, CD155 antigen                                                                                    | Isoform Alpha: Cell membrane; Single-pass type I membrane protein., Isoform Delta: Cell membrane; Single-pass type I membrane protein., Isoform Beta: Secreted., Isoform Gamma: Secreted.                                                                                                                                                                                          | * | 1 |
| P15529 | 20 | 23 |     |     |    | 8  |    |     |    |     | Membrane cofactor protein precursor, Trophoblast leukocyte common antigen, TLX, CD46 antigen                                                                   | Acrosome inner membrane; Single-pass type I membrane protein. Note=Inner acrosomal membrane of spermatozoa. Internalized upon binding of Measles virus, Herpesvirus 6 or Neisseria gonorrhoeae, which results in an increased susceptibility of infected cells to complement-mediated injury. In cancer cells or cells infected by Neisseria, shedding leads to a soluble peptide. | * | 1 |
| P15848 |    |    |     |     | 7  | 7  | 9  | 28  |    |     | Arylsulfatase B precursor, ASB, N-acetylgalactosamine-4-sulfatase, G4S                                                                                         | Lysosome.                                                                                                                                                                                                                                                                                                                                                                          | * | 0 |

Total Protein Identified

|        |    |    |    |    |    |    |     |    |    |    |                                                                                                                                                                                                                                                                                         |                                                                                                                                                                                                                                                                                                                                                                                                                                                                                                                                                                                                                                                                    |   |   |
|--------|----|----|----|----|----|----|-----|----|----|----|-----------------------------------------------------------------------------------------------------------------------------------------------------------------------------------------------------------------------------------------------------------------------------------------|--------------------------------------------------------------------------------------------------------------------------------------------------------------------------------------------------------------------------------------------------------------------------------------------------------------------------------------------------------------------------------------------------------------------------------------------------------------------------------------------------------------------------------------------------------------------------------------------------------------------------------------------------------------------|---|---|
| P15941 |    |    |    |    | 18 | 20 |     |    |    |    | Mucin-1 precursor, MUC-1, Polymorphic epithelial mucin, PEM, PEMT, Episialin, Tumor-associated mucin, Carcinoma-associated mucin, Tumor-associated epithelial membrane antigen, EMA, H23AG, Peanut-reactive urinary mucin, PUM, Breast carcinoma-associated antigen DF3, CD227 antigen  | Apical cell membrane; Single-pass type I membrane protein. Note=Exclusively located in the apical domain of the plasma membrane of highly polarized epithelial cells. After endocytosis, internalized and recycled to the cell membrane. Located to microvilli and to the tips of long filopodial protrusions. Isoform 5: Secreted., Isoform 7: Secreted., Isoform 9: Secreted., Mucin-1 subunit beta: Cell membrane. Cytoplasm. Nucleus. Note=On EGF and PDGFRB stimulation, transported to the nucleus through interaction with CTNNB1, a process which is stimulated by phosphorylation. On HRG stimulation, colocalizes with JUP/gamma-catenin at the nucleus. | * | 1 |
| P16112 |    |    | 34 | 20 |    |    |     |    |    |    | Aggrecan core protein precursor, Cartilage-specific proteoglycan core protein, CSPCP, Chondroitin sulfate proteoglycan core protein 1                                                                                                                                                   | Secreted, extracellular space, extracellular matrix (By similarity).                                                                                                                                                                                                                                                                                                                                                                                                                                                                                                                                                                                               | * | 0 |
| P16422 | 68 | 97 |    |    |    |    |     |    |    |    | Tumor-associated calcium signal transducer 1 precursor, Major gastrointestinal tumor-associated protein GA733-2, Epithelial cell surface antigen, Epithelial glycoprotein, EGP, Adenocarcinoma-associated antigen, KSA, KS 1/4 antigen, Cell surface glycoprotein Trop-1, CD326 antigen | Membrane; Single-pass type I membrane protein.                                                                                                                                                                                                                                                                                                                                                                                                                                                                                                                                                                                                                     | * | 1 |
| P17050 | 3  | 17 | 37 | 45 | 43 | 47 | 113 | 96 | 11 |    | Alpha-N-acetylgalactosaminidase precursor, Alpha-galactosidase B                                                                                                                                                                                                                        | Lysosome.                                                                                                                                                                                                                                                                                                                                                                                                                                                                                                                                                                                                                                                          | * | 0 |
| P17301 | 61 | 37 |    |    | 14 | 17 | 13  | 17 |    |    | Integrin alpha-2 precursor, Platelet membrane glycoprotein Ia, GPIa, Collagen receptor, VLA-2 alpha chain, CD49b antigen                                                                                                                                                                | Membrane; Single-pass type I membrane protein.                                                                                                                                                                                                                                                                                                                                                                                                                                                                                                                                                                                                                     | * | 1 |
| P17405 |    |    |    |    |    |    |     | 9  |    |    | Sphingomyelin phosphodiesterase precursor, Acid sphingomyelinase, aSMase                                                                                                                                                                                                                | Lysosome.                                                                                                                                                                                                                                                                                                                                                                                                                                                                                                                                                                                                                                                          | * | 0 |
| P17813 |    |    |    |    |    |    | 5   |    |    | 19 | Endoglin precursor, CD105 antigen                                                                                                                                                                                                                                                       | Membrane; Single-pass type I membrane protein.                                                                                                                                                                                                                                                                                                                                                                                                                                                                                                                                                                                                                     | * | 1 |
| P17900 | 3  | 7  |    | 21 | 29 | 40 |     | 43 | 11 | 21 | Ganglioside GM2 activator precursor, GM2-AP, Cerebroside sulfate activator protein, Shingolipid activator protein 3, SAP-3                                                                                                                                                              | Lysosome.                                                                                                                                                                                                                                                                                                                                                                                                                                                                                                                                                                                                                                                          | * | 0 |
| P17936 |    |    | 51 |    |    |    |     |    |    |    | Insulin-like growth factor-binding protein 3 precursor, IGF-binding protein 3, IGFBP-3, IBP-3                                                                                                                                                                                           | Secreted.                                                                                                                                                                                                                                                                                                                                                                                                                                                                                                                                                                                                                                                          | * | 0 |
| P18084 | 23 | 15 |    | 2  |    | 20 | 27  | 46 |    | 8  | Integrin beta-5 precursor                                                                                                                                                                                                                                                               | Membrane; Single-pass type I membrane protein.                                                                                                                                                                                                                                                                                                                                                                                                                                                                                                                                                                                                                     | * | 1 |
| P18827 |    |    |    |    |    |    |     |    |    | 16 | Syndecan-1 precursor, SYND1, CD138 antigen                                                                                                                                                                                                                                              | Membrane; Single-pass type I membrane protein.                                                                                                                                                                                                                                                                                                                                                                                                                                                                                                                                                                                                                     | * | 1 |
| P19022 |    |    | 2  |    | 16 | 41 | 16  | 17 |    | 13 | Cadherin-2 precursor, Neural cadherin, N-cadherin, CD325 antigen, CDw325                                                                                                                                                                                                                | Cell membrane; Single-pass type I membrane protein.                                                                                                                                                                                                                                                                                                                                                                                                                                                                                                                                                                                                                | * | 1 |
| P19075 | 66 | 40 |    |    |    |    |     |    |    |    | Tetraspanin-8, Tspan-8, Transmembrane 4 superfamily member 3, Tumor-associated antigen CO-029                                                                                                                                                                                           | Membrane; Multi-pass membrane protein.                                                                                                                                                                                                                                                                                                                                                                                                                                                                                                                                                                                                                             | * | 4 |
| P19440 | 9  |    |    |    | 2  | 2  |     |    |    |    | Gamma-glutamyltranspeptidase 1 precursor, Gamma-glutamyltransferase 1, GGT 1, CD224 antigen                                                                                                                                                                                             | Membrane; Single-pass type II membrane protein.                                                                                                                                                                                                                                                                                                                                                                                                                                                                                                                                                                                                                    | * | 1 |
| P20645 |    |    |    |    |    |    |     | 5  |    |    | Cation-dependent mannose-6-phosphate receptor precursor, CD Man-6-P receptor, CD-MPR, 46 kDa mannose 6-phosphate receptor, MPR 46                                                                                                                                                       | Lysosome membrane; Single-pass type I membrane protein.                                                                                                                                                                                                                                                                                                                                                                                                                                                                                                                                                                                                            | * | 1 |

## Total Protein Identified

|        |     |     |     |     |    |    |     |     |    |    |                                                                                                                                                                                               |                                                                                                                                                    |   |   |
|--------|-----|-----|-----|-----|----|----|-----|-----|----|----|-----------------------------------------------------------------------------------------------------------------------------------------------------------------------------------------------|----------------------------------------------------------------------------------------------------------------------------------------------------|---|---|
| P20933 | 5   | 18  | 21  | 10  | 10 |    | 18  | 71  | 5  |    | N(4)-(beta-N-acetylglucosaminy)-L-asparaginase precursor, Glycosylasparaginase, Aspartylglucosaminidase, N4-(N-acetyl-beta-glucosaminy)-L-asparagine amidase, AGA                             | Lysosome.                                                                                                                                          | * | 0 |
| P21589 | 9   | 18  | 7   |     | 5  | 43 | 98  | 110 | 13 | 63 | 5'-nucleotidase precursor, Ecto-5'-nucleotidase, 5'-NT, CD73 antigen                                                                                                                          | Cell membrane; Lipid-anchor, GPI-anchor.                                                                                                           | * | 0 |
| P21926 | 12  | 20  |     |     | 8  | 56 | 9   |     |    | 18 | CD9 antigen, p24, Leukocyte antigen MIC3, Motility-related protein, MRP-1, Tetraspanin-29, Tspan-29, 5H9 antigen, Cell growth-inhibiting gene 2 protein                                       | Membrane; Multi-pass membrane protein.                                                                                                             | * | 4 |
| P22304 |     | 3   |     |     |    |    |     |     |    | 6  | Iduronate 2-sulfatase precursor, Alpha-L-iduronate sulfate sulfatase, Idursulfase                                                                                                             | Lysosome.                                                                                                                                          | * | 0 |
| P23229 | 10  | 6   |     |     |    |    |     |     |    |    | Integrin alpha-6 precursor, VLA-6, CD49f antigen                                                                                                                                              | Membrane; Single-pass type I membrane protein.                                                                                                     | * | 1 |
| P23470 |     |     |     |     | 2  |    | 7   | 6   |    |    | Receptor-type tyrosine-protein phosphatase gamma precursor, Protein-tyrosine phosphatase gamma, R-PTP-gamma                                                                                   | Membrane; Single-pass type I membrane protein (Probable).                                                                                          | * | 1 |
| P24821 |     |     | 104 | 255 |    | 62 | 61  | 11  |    |    | Tenascin precursor, TN, Tenascin-C, TN-C, Hexabrachion, Cytotactin, Neuronectin, GMEM, JI, Myotendinous antigen, Glioma-associated-extracellular matrix antigen, GP 150-225                   | Secreted, extracellular space, extracellular matrix.                                                                                               | * | 0 |
| P25311 |     | 2   |     |     |    |    |     |     |    |    | Zinc-alpha-2-glycoprotein precursor, Zn-alpha-2-glycoprotein, Zn-alpha-2-GP                                                                                                                   | Secreted.                                                                                                                                          | * | 0 |
| P25942 |     |     |     |     |    |    | 5   | 12  |    |    | Tumor necrosis factor receptor superfamily member 5 precursor, CD40L receptor, B-cell surface antigen CD40, Bp50, CD40 antigen, CDw40                                                         | Isoform I: Cell membrane; Single-pass type I membrane protein., Isoform II: Secreted.                                                              | * | 1 |
| P26006 | 10  |     |     |     | 9  | 17 | 182 | 178 |    | 28 | Integrin alpha-3 precursor, Galactoprotein B3, GAPB3, VLA-3 alpha chain, FRP-2, CD49c antigen                                                                                                 | Membrane; Single-pass type I membrane protein.                                                                                                     | * | 1 |
| P27487 | 100 | 106 |     |     | 26 | 86 | 106 | 235 |    |    | Dipeptidyl peptidase 4, Dipeptidyl peptidase IV, DPP IV, T-cell activation antigen CD26, TP103, Adenosine deaminase complexing protein 2, ADABP                                               | Dipeptidyl peptidase 4 soluble form: Secreted., Cell membrane; Single-pass type II membrane protein.                                               | * | 1 |
| P27701 | 2   |     |     |     |    |    |     |     |    |    | CD82 antigen, Inducible membrane protein R2, C33 antigen, IA4, Metastasis suppressor Kangai 1, Suppressor of tumorigenicity-6, Tetraspanin-27, Tspan-27                                       | Membrane; Multi-pass membrane protein.                                                                                                             | * | 4 |
| P28799 | 19  | 18  |     |     | 16 | 46 | 14  | 28  |    |    | Granulins precursor, Proepithelin, PEPI                                                                                                                                                       | Secreted.                                                                                                                                          | * | 0 |
| P28827 |     |     |     |     |    |    |     | 14  |    |    | Receptor-type tyrosine-protein phosphatase mu precursor, Protein-tyrosine phosphatase mu, R-PTP-mu                                                                                            | Membrane; Single-pass type I membrane protein.                                                                                                     | * | 1 |
| P29323 |     | 6   |     |     |    | 4  | 2   |     |    |    | Ephrin type-B receptor 2 precursor, Tyrosine-protein kinase receptor EPH-3, DRT, Receptor protein-tyrosine kinase HEK5, ERK, Tyrosine-protein kinase TYRO5, Renal carcinoma antigen NY-REN-47 | Membrane; Single-pass type I membrane protein.                                                                                                     | * | 1 |
| P30447 |     |     |     |     | 34 | 40 | 6   | 10  |    |    | HLA class I histocompatibility antigen, A-23 alpha chain precursor, MHC class I antigen A*23, A-9                                                                                             | Membrane; Single-pass type I membrane protein.                                                                                                     | * | 1 |
| P30464 |     |     | 8   |     |    |    |     |     |    |    | HLA class I histocompatibility antigen, B-15 alpha chain precursor, MHC class I antigen B*15                                                                                                  | Membrane; Single-pass type I membrane protein.                                                                                                     | * | 1 |
| P30481 |     |     |     |     | 31 | 43 |     |     |    |    | HLA class I histocompatibility antigen, B-44 alpha chain precursor, MHC class I antigen B*44, Bw-44                                                                                           | Membrane; Single-pass type I membrane protein.                                                                                                     | * | 1 |
| P30508 |     |     |     |     |    |    | 31  |     |    |    | HLA class I histocompatibility antigen, Cw-12 alpha chain precursor, MHC class I antigen Cw*12                                                                                                | Membrane; Single-pass type I membrane protein.                                                                                                     | * | 1 |
| P30530 |     |     |     |     |    |    |     | 3   |    |    | Tyrosine-protein kinase receptor UFO precursor, AXL oncogene                                                                                                                                  | Membrane; Single-pass type I membrane protein.                                                                                                     | * | 1 |
| P30533 | 13  | 9   | 8   |     |    | 11 |     |     |    |    | Alpha-2-macroglobulin receptor-associated protein precursor, Alpha-2-MRAP, Low density lipoprotein receptor-related protein-associated protein 1, RAP                                         | Endoplasmic reticulum. Cytoplasm. Cell surface. Note=Intracellular and associated with cell surface receptors. Found in the endoplasmic reticulum. | * | 0 |
| P30685 |     |     |     |     |    |    | 6   |     |    |    | HLA class I histocompatibility antigen, B-35 alpha chain precursor, MHC class I antigen B*35                                                                                                  | Membrane; Single-pass type I membrane protein.                                                                                                     | * | 1 |
| P31431 |     |     |     |     |    | 9  |     |     |    |    | Syndecan-4 precursor, SYND4, Amphiglycan, Ryudocan core protein                                                                                                                               | Membrane; Single-pass type I membrane protein.                                                                                                     | * | 1 |
| P32970 |     |     |     |     | 30 | 79 |     |     | 5  | 34 | CD70 antigen, CD27 ligand, CD27-L, Tumor necrosis factor ligand superfamily member 7                                                                                                          | Membrane; Single-pass type II membrane protein.                                                                                                    | * | 1 |

## Total Protein Identified

|        |     |    |    |    |    |    |    |     |    |    |                                                                                                                                                                                                                                                  |                                                                                                                                                                                                                                                                                                                                                                                                                                                                                                                                                                                                                                                                |   |   |
|--------|-----|----|----|----|----|----|----|-----|----|----|--------------------------------------------------------------------------------------------------------------------------------------------------------------------------------------------------------------------------------------------------|----------------------------------------------------------------------------------------------------------------------------------------------------------------------------------------------------------------------------------------------------------------------------------------------------------------------------------------------------------------------------------------------------------------------------------------------------------------------------------------------------------------------------------------------------------------------------------------------------------------------------------------------------------------|---|---|
| P34059 | 20  | 40 | 12 | 16 | 28 | 41 | 27 | 48  |    | 7  | N-acetylgalactosamine-6-sulfatase precursor, N-acetylgalactosamine-6-sulfate sulfatase, Galactose-6-sulfate sulfatase, GalNAc6S sulfatase, Chondroitinsulfatase, Chondroitinase                                                                  | Lysosome.                                                                                                                                                                                                                                                                                                                                                                                                                                                                                                                                                                                                                                                      | * | 0 |
| P35052 |     |    | 14 | 5  | 4  | 55 |    |     | 5  | 39 | Glypican-1 precursor                                                                                                                                                                                                                             | Cell membrane; Lipid-anchor, GPI-anchor; Extracellular side.                                                                                                                                                                                                                                                                                                                                                                                                                                                                                                                                                                                                   | * | 0 |
| P35475 |     | 6  |    |    |    |    |    | 12  |    |    | Alpha-L-iduronidase precursor                                                                                                                                                                                                                    | Lysosome.                                                                                                                                                                                                                                                                                                                                                                                                                                                                                                                                                                                                                                                      | * | 0 |
| P35555 |     |    |    |    |    |    | 6  |     |    |    | Fibrillin-1 precursor                                                                                                                                                                                                                            | Secreted, extracellular space, extracellular matrix.                                                                                                                                                                                                                                                                                                                                                                                                                                                                                                                                                                                                           | * | 0 |
| P35613 | 116 | 77 | 28 |    | 31 | 89 | 77 | 124 |    | 60 | Basigin precursor, Leukocyte activation antigen M6, Collagenase stimulatory factor, Extracellular matrix metalloproteinase inducer, EMMPRIN, 5F7, Tumor cell-derived collagenase stimulatory factor, TCSF, OK blood group antigen, CD147 antigen | Cell membrane; Single-pass type I membrane protein (By similarity). Melanosome. Note=Colocalizes with SLC16A1 and SLC16A8 (By similarity). Identified by mass spectrometry in melanosome fractions from stage I to stage IV.                                                                                                                                                                                                                                                                                                                                                                                                                                   | * | 1 |
| P37198 |     | 7  |    |    |    |    |    |     |    |    | Nuclear pore glycoprotein p62, 62 kDa nucleoporin                                                                                                                                                                                                | Nucleus, nuclear pore complex. Note=Central region of the nuclear pore, within the transporter. During mitotic cell division, it associates with the poles of the mitotic spindle.                                                                                                                                                                                                                                                                                                                                                                                                                                                                             | * | 0 |
| P39060 |     |    |    |    |    | 18 | 2  | 18  |    |    | Collagen alpha-1(XVIII) chain precursor                                                                                                                                                                                                          | Secreted, extracellular space, extracellular matrix (By similarity).                                                                                                                                                                                                                                                                                                                                                                                                                                                                                                                                                                                           | * | 0 |
| P41222 |     |    |    |    | 14 | 26 |    |     |    |    | Prostaglandin-H2 D-isomerase precursor, Lipocalin-type prostaglandin-D synthase, Glutathione-independent PGD synthetase, Prostaglandin-D2 synthase, PGD2 synthase, PGDS2, PGDS, Beta-trace protein, Cerebrin-28                                  | Rough endoplasmic reticulum. Nucleus membrane. Golgi apparatus. Cytoplasm, perinuclear region. Secreted. Note=Detected on rough endoplasmic reticulum of arachnoid and meningioma cells. Localized to the nuclear envelope, Golgi apparatus, secretory vesicles and spherical cytoplasmic structures in arachnoid trabecular cells, and to circular cytoplasmic structures in meningeal macrophages and perivascular microglial cells. In oligodendrocytes, localized to the rough endoplasmic reticulum and nuclear envelope. In retinal pigment epithelial cells, localized to distinct cytoplasmic domains including the perinuclear region. Also secreted. | * | 0 |
| P42785 |     |    |    | 8  |    | 8  | 63 | 136 | 10 | 5  | Lysosomal Pro-X carboxypeptidase precursor, Prolylcarboxypeptidase, PRCP, Proline carboxypeptidase, Angiotensinase C, Lysosomal carboxypeptidase C                                                                                               | Lysosome.                                                                                                                                                                                                                                                                                                                                                                                                                                                                                                                                                                                                                                                      | * | 0 |
| P42892 |     |    |    |    |    |    | 4  | 18  |    | 59 | Endothelin-converting enzyme 1, ECE-1                                                                                                                                                                                                            | Membrane; Single-pass type II membrane protein.                                                                                                                                                                                                                                                                                                                                                                                                                                                                                                                                                                                                                | * | 1 |

## Total Protein Identified

|        |    |    |    |    |    |    |    |     |    |     |                                                                                                                                                                                                                                         |                                                                                                                                                                                                 |   |   |
|--------|----|----|----|----|----|----|----|-----|----|-----|-----------------------------------------------------------------------------------------------------------------------------------------------------------------------------------------------------------------------------------------|-------------------------------------------------------------------------------------------------------------------------------------------------------------------------------------------------|---|---|
| P43121 | 9  |    | 88 | 25 | 2  | 52 | 65 | 72  |    | 179 | Cell surface glycoprotein MUC18 precursor, Melanoma-associated antigen MUC18, Melanoma cell adhesion molecule, Melanoma-associated antigen A32, S-endo 1 endothelial-associated antigen, Cell surface glycoprotein P1H12, CD146 antigen | Membrane; Single-pass type I membrane protein.                                                                                                                                                  | * | 1 |
| P43251 | 6  | 11 |    |    |    |    | 6  | 6   |    |     | Biotinidase precursor, Biotinase                                                                                                                                                                                                        | Secreted, extracellular space.                                                                                                                                                                  | * | 0 |
| P43307 |    |    | 14 |    |    | 6  |    |     |    | 11  | Translocon-associated protein subunit alpha precursor, TRAP-alpha, Signal sequence receptor subunit alpha, SSR-alpha                                                                                                                    | Endoplasmic reticulum membrane; Single-pass type I membrane protein.                                                                                                                            | * | 1 |
| P46976 | 7  | 10 |    | 16 | 8  |    |    | 13  | 43 | 12  | Glycogenin-1                                                                                                                                                                                                                            | Entry not found!                                                                                                                                                                                | * | 0 |
| P48307 |    |    |    |    |    | 20 |    |     |    |     | Tissue factor pathway inhibitor 2 precursor, TFPI-2, Placental protein 5, PP5                                                                                                                                                           | Secreted.                                                                                                                                                                                       | * | 0 |
| P48509 | 4  |    |    |    |    |    | 21 | 17  |    |     | CD151 antigen, Platelet-endothelial tetraspan antigen 3, PETA-3, GP27, Membrane glycoprotein SFA-1, Tetraspanin-24, Tspan-24                                                                                                            | Membrane; Multi-pass membrane protein.                                                                                                                                                          | * | 4 |
| P48960 | 3  | 2  |    |    | 9  |    |    |     |    | 10  | CD97 antigen precursor, Leukocyte antigen CD97                                                                                                                                                                                          | Cell membrane; Multi-pass membrane protein., CD97 antigen subunit alpha: Secreted, extracellular space.                                                                                         | * | 7 |
| P49755 |    |    |    |    |    |    |    |     |    | 13  | Transmembrane emp24 domain-containing protein 10 precursor, 21 kDa transmembrane-trafficking protein, Transmembrane protein Tmp21, Tmp-21-I, p24delta, S31III125, S31II125                                                              | Golgi apparatus membrane; Single-pass type I membrane protein; Luminal side (By similarity). Melanosome. Note=Identified by mass spectrometry in melanosome fractions from stage I to stage IV. | * | 1 |
| P50454 | 5  | 28 |    |    |    | 91 | 41 | 37  | 15 | 93  | Serpin H1 precursor, Collagen-binding protein, Colligin, 47 kDa heat shock protein, Rheumatoid arthritis-related antigen RA-A47, Arsenic-transactivated protein 3, AsTP3, Cell proliferation-inducing gene 14 protein                   | Endoplasmic reticulum lumen.                                                                                                                                                                    | * | 0 |
| P50895 | 22 | 85 |    |    | 4  | 13 |    |     |    |     | Lutheran blood group glycoprotein precursor, B-CAM cell surface glycoprotein, Auberger B antigen, F8/G253 antigen, CD239 antigen                                                                                                        | Membrane; Single-pass type I membrane protein.                                                                                                                                                  | * | 1 |
| P51688 |    | 15 |    |    | 34 | 19 | 49 | 32  | 45 | 14  | N-sulphoglucosamine sulphohydrolase precursor, Sulfolglucosamine sulfamidase, Sulphamidase                                                                                                                                              | Lysosome.                                                                                                                                                                                       | * | 0 |
| P52799 |    | 9  |    |    |    |    |    |     |    | 2   | Ephrin-B2 precursor, EPH-related receptor tyrosine kinase ligand 5, LERK-5, HTK ligand, HTK-L                                                                                                                                           | Membrane; Single-pass type I membrane protein.                                                                                                                                                  | * | 1 |
| P53634 | 57 | 62 | 11 | 18 | 67 | 62 | 92 | 150 | 10 |     | Dipeptidyl-peptidase 1 precursor, Dipeptidyl-peptidase I, DPP-I, DPP-I, Cathepsin C, Cathepsin J, Dipeptidyl transferase                                                                                                                | Lysosome.                                                                                                                                                                                       | * | 0 |
| P54289 |    |    |    |    |    |    | 3  |     |    |     | Voltage-dependent calcium channel subunit alpha-2/delta-1 precursor, Voltage-gated calcium channel subunit alpha-2/delta-1                                                                                                              | Membrane; Single-pass type I membrane protein (Potential).                                                                                                                                      | * | 1 |
| P54709 |    |    | 10 |    |    |    |    |     |    | 7   | Sodium/potassium-transporting ATPase subunit beta-3, Sodium/potassium-dependent ATPase subunit beta-3, ATPB-3, CD298 antigen                                                                                                            | Membrane; Single-pass type II membrane protein. Melanosome. Note=Identified by mass spectrometry in melanosome fractions from stage I to stage IV.                                              | * | 1 |
| P54753 |    | 14 |    |    |    |    |    |     |    |     | Ephrin type-B receptor 3 precursor, Tyrosine-protein kinase receptor HEK-2, Tyrosine-protein kinase TYRO6                                                                                                                               | Membrane; Single-pass type I membrane protein.                                                                                                                                                  | * | 1 |
| P54802 | 2  | 7  |    |    |    | 2  | 3  |     |    |     | Alpha-N-acetylglucosaminidase precursor, N-acetyl-alpha-glucosaminidase, NAG                                                                                                                                                            | Entry not found!                                                                                                                                                                                | * | 0 |
| P54803 |    |    |    |    |    |    |    | 2   |    |     | Galactocerebrosidase precursor, GALCERase, Galactosylceramidase, Galactosylceramide beta-galactosidase, Galactocerebrosidase beta-galactosidase                                                                                         | Lysosome.                                                                                                                                                                                       | * | 0 |
| P55285 |    |    |    |    |    | 5  |    |     |    |     | Cadherin-6 precursor, Kidney cadherin, K-cadherin                                                                                                                                                                                       | Cell membrane; Single-pass type I membrane protein.                                                                                                                                             | * | 1 |
| P55290 |    |    |    |    |    |    |    |     |    | 19  | Cadherin-13 precursor, Truncated cadherin, T-cadherin, T-cad, Heart cadherin, H-cadherin, P105                                                                                                                                          | Cell membrane; Lipid-anchor, GPI-anchor.                                                                                                                                                        | * | 0 |

## Total Protein Identified

|        |    |    |  |  |    |    |    |    |  |                                                                                                                                                                                                                                                                                                                                           |                                                                                                                                                                                                                                                                                                                                                                                                                                                                                                                                                                                                                                                                                                                                                                                                                                                                                                                                    |   |   |
|--------|----|----|--|--|----|----|----|----|--|-------------------------------------------------------------------------------------------------------------------------------------------------------------------------------------------------------------------------------------------------------------------------------------------------------------------------------------------|------------------------------------------------------------------------------------------------------------------------------------------------------------------------------------------------------------------------------------------------------------------------------------------------------------------------------------------------------------------------------------------------------------------------------------------------------------------------------------------------------------------------------------------------------------------------------------------------------------------------------------------------------------------------------------------------------------------------------------------------------------------------------------------------------------------------------------------------------------------------------------------------------------------------------------|---|---|
| P56159 |    |    |  |  | 21 | 14 | 22 |    |  | GDNF family receptor alpha-1 precursor, GFR-alpha-1, GDNF receptor alpha, GDNFR-alpha, TGF-beta-related neurotrophic factor receptor 1, RET ligand 1                                                                                                                                                                                      | Cell membrane; Lipid-anchor, GPI-anchor (By similarity).                                                                                                                                                                                                                                                                                                                                                                                                                                                                                                                                                                                                                                                                                                                                                                                                                                                                           | * | 0 |
| P56199 | 4  | 8  |  |  |    |    | 3  |    |  | Integrin alpha-1 precursor, Laminin and collagen receptor, VLA-1, CD49a antigen                                                                                                                                                                                                                                                           | Membrane; Single-pass type I membrane protein.                                                                                                                                                                                                                                                                                                                                                                                                                                                                                                                                                                                                                                                                                                                                                                                                                                                                                     | * | 1 |
| P61769 |    |    |  |  | 6  | 9  |    |    |  | Beta-2-microglobulin precursor                                                                                                                                                                                                                                                                                                            | Secreted.                                                                                                                                                                                                                                                                                                                                                                                                                                                                                                                                                                                                                                                                                                                                                                                                                                                                                                                          | * | 0 |
| P78310 |    |    |  |  |    |    | 5  |    |  | Coxsackievirus and adenovirus receptor precursor, Coxsackievirus B-adenovirus receptor, hCAR, CVB3-binding protein, HCVADR                                                                                                                                                                                                                | Isoform 1: Cell membrane; Single-pass type I membrane protein. Cell junction, tight junction; Single-pass type I membrane protein. Cell junction, adherens junction; Single-pass type I membrane protein. Basolateral cell membrane; Single-pass type I membrane protein. Note=In epithelial cells localizes to the apical junction complex composed of tight and adherens junctions. In airway epithelial cells localized to basolateral membrane but not to apical surface., Isoform 2: Cell membrane; Single-pass type I membrane protein. Cell junction, tight junction; Single-pass type I membrane protein. Cell junction, adherens junction; Single-pass type I membrane protein. Basolateral cell membrane; Single-pass membrane protein. Note=In epithelial cells localizes to the apical junction complex composed of tight and adherens junctions. In airway epithelial cells localized to basolateral membrane but not | * | 1 |
| P78324 |    |    |  |  |    |    | 15 | 20 |  | Tyrosine-protein phosphatase non-receptor type substrate 1 precursor, SHP substrate 1, SHPS-1, Inhibitory receptor SHPS-1, Signal regulatory protein alpha-1, Sirp-alpha-1, Sirp-alpha-2, Sirp-alpha-3, MyD-1 antigen, Brain Ig-like molecule with tyrosine-based activation motifs, Bit, Macrophage fusion receptor, p84, CD172a antigen | Membrane; Single-pass type I membrane protein.                                                                                                                                                                                                                                                                                                                                                                                                                                                                                                                                                                                                                                                                                                                                                                                                                                                                                     | * | 1 |
| P80188 | 33 | 25 |  |  | 19 |    |    |    |  | Neutrophil gelatinase-associated lipocalin precursor, NGAL, p25, 25 kDa alpha-2-microglobulin-related subunit of MMP-9, Lipocalin-2, Oncogene 24p3                                                                                                                                                                                        | Secreted.                                                                                                                                                                                                                                                                                                                                                                                                                                                                                                                                                                                                                                                                                                                                                                                                                                                                                                                          | * | 0 |
| P98160 | 7  | 5  |  |  |    |    |    |    |  | Basement membrane-specific heparan sulfate proteoglycan core protein precursor, HSPG, Perlecan, PLC                                                                                                                                                                                                                                       | Secreted, extracellular space.                                                                                                                                                                                                                                                                                                                                                                                                                                                                                                                                                                                                                                                                                                                                                                                                                                                                                                     | * | 0 |
| P98172 | 4  | 20 |  |  |    |    |    |    |  | Ephrin-B1 precursor, Eph-related receptor tyrosine kinase ligand 2, LERK-2, ELK ligand, ELK-L                                                                                                                                                                                                                                             | Membrane; Single-pass type I membrane protein.                                                                                                                                                                                                                                                                                                                                                                                                                                                                                                                                                                                                                                                                                                                                                                                                                                                                                     | * | 1 |
| Q01082 |    | 4  |  |  |    |    | 19 |    |  | Spectrin beta chain, brain 1, Spectrin, non-erythroid beta chain 1, Beta-II spectrin, Fodrin beta chain                                                                                                                                                                                                                                   | Cytoplasm, cytoskeleton (By similarity), Isoform 2: Cell membrane; Peripheral membrane protein; Cytoplasmic side (By similarity).                                                                                                                                                                                                                                                                                                                                                                                                                                                                                                                                                                                                                                                                                                                                                                                                  | * | 0 |
| Q01459 |    | 15 |  |  |    |    | 18 | 36 |  | Di-N-acetylchitinase precursor                                                                                                                                                                                                                                                                                                            | Lysosome.                                                                                                                                                                                                                                                                                                                                                                                                                                                                                                                                                                                                                                                                                                                                                                                                                                                                                                                          | * | 0 |
| Q02083 |    |    |  |  | 6  | 8  |    |    |  | N-acyl ethanolamine-hydrolyzing acid amidase precursor, N-acyl sphingosine amidohydrolase-like, ASAH-like protein, Acid ceramidase-like protein                                                                                                                                                                                           | Lysosome (Probable).                                                                                                                                                                                                                                                                                                                                                                                                                                                                                                                                                                                                                                                                                                                                                                                                                                                                                                               | * | 0 |

Total Protein Identified

|        |     |     |    |     |     |     |    |     |    |                                                                                                                                                                                                       |                                                                                                                                                                                                                                                                                                                                                                                                                                                                        |   |   |
|--------|-----|-----|----|-----|-----|-----|----|-----|----|-------------------------------------------------------------------------------------------------------------------------------------------------------------------------------------------------------|------------------------------------------------------------------------------------------------------------------------------------------------------------------------------------------------------------------------------------------------------------------------------------------------------------------------------------------------------------------------------------------------------------------------------------------------------------------------|---|---|
| Q02388 |     |     |    |     | 10  |     |    |     |    | Collagen alpha-1(VII) chain precursor, Long-chain collagen, LC collagen                                                                                                                               | Secreted, extracellular space, extracellular matrix, basement membrane.                                                                                                                                                                                                                                                                                                                                                                                                | * | 0 |
| Q02487 |     | 7   |    |     |     |     |    |     |    | Desmocollin-2 precursor, Desmosomal glycoprotein II and III, Desmocollin-3                                                                                                                            | Cell membrane; Single-pass type I membrane protein. Cell junction, desmosome.                                                                                                                                                                                                                                                                                                                                                                                          | * | 1 |
| Q02809 |     | 6   | 72 | 139 | 85  | 17  | 17 | 23  | 86 | Procollagen-lysine,2-oxoglutarate 5-dioxygenase 1 precursor, Lysyl hydroxylase 1, LH1                                                                                                                 | Rough endoplasmic reticulum membrane; Peripheral membrane protein; Luminal side.                                                                                                                                                                                                                                                                                                                                                                                       | * | 0 |
| Q03405 | 4   | 5   |    |     | 5   | 19  | 7  |     |    | Urokinase plasminogen activator surface receptor precursor, uPAR, U-PAR, Monocyte activation antigen Mo3, CD87 antigen                                                                                | Isoform 1: Cell membrane; Lipid-anchor, GPI-anchor., Isoform 2: Secreted (Probable).                                                                                                                                                                                                                                                                                                                                                                                   | * | 0 |
| Q04721 |     | 4   |    |     |     |     |    |     |    | Neurogenic locus notch homolog protein 2 precursor, Notch 2, hN2                                                                                                                                      | Cell membrane; Single-pass type I membrane protein., Notch 2 intracellular domain: Nucleus. Note=Following proteolytical processing NICD is translocated to the nucleus.                                                                                                                                                                                                                                                                                               | * | 1 |
| Q04941 |     |     |    |     |     |     |    |     | 6  | Proteolipid protein 2, Intestinal membrane A4 protein, Differentiation-dependent protein A4                                                                                                           | Membrane; Multi-pass membrane protein.                                                                                                                                                                                                                                                                                                                                                                                                                                 | * | 4 |
| Q05707 |     |     |    |     | 18  |     |    |     |    | Collagen alpha-1(XIV) chain precursor, Undulin                                                                                                                                                        | Secreted, extracellular space, extracellular matrix (By similarity).                                                                                                                                                                                                                                                                                                                                                                                                   | * | 0 |
| Q07954 |     |     | 7  |     | 3   | 18  |    | 6   | 4  | Prolow-density lipoprotein receptor-related protein 1 precursor, LRP, Alpha-2-macroglobulin receptor, A2MR, Apolipoprotein E receptor, APOER, CD91 antigen                                            | Low-density lipoprotein receptor-related protein 1 85 kDa subunit: Cell membrane; Single-pass type I membrane protein., Low-density lipoprotein receptor-related protein 1 515 kDa subunit: Cell membrane; Peripheral membrane protein; Extracellular side., Low-density lipoprotein receptor-related protein 1 intracellular domain: Cytoplasm. Nucleus. Note=After cleavage, the intracellular domain (LRPICD) is detected both in the cytoplasm and in the nucleus. | * | 1 |
| Q08380 | 124 | 210 | 10 |     | 100 | 102 | 55 | 133 |    | Galectin-3-binding protein precursor, Lectin galactoside-binding soluble 3-binding protein, Mac-2-binding protein, Mac-2 BP, MAC2BP, Tumor-associated antigen 90K, Basement membrane autoantigen p105 | Secreted. Secreted, extracellular space, extracellular matrix.                                                                                                                                                                                                                                                                                                                                                                                                         | * | 0 |
| Q08431 | 23  | 10  | 28 |     |     |     |    |     |    | Lactadherin precursor, Milk fat globule-EGF factor 8, MFG-E8, HMFG, Breast epithelial antigen BA46, MFGM                                                                                              | Membrane; Peripheral membrane protein.                                                                                                                                                                                                                                                                                                                                                                                                                                 | * | 0 |
| Q08722 | 12  |     |    |     |     |     |    |     |    | Leukocyte surface antigen CD47 precursor, Integrin-associated protein, IAP, Antigenic surface determinant protein OA3, Protein MER6                                                                   | Cell membrane; Multi-pass membrane protein.                                                                                                                                                                                                                                                                                                                                                                                                                            | * | 5 |
| Q10588 |     |     |    |     | 3   | 28  |    |     |    | ADP-ribosyl cyclase 2 precursor, Cyclic ADP-ribose hydrolase 2, cADPr hydrolase 2, Bone marrow stromal antigen 1, BST-1, CD157 antigen                                                                | Cell membrane; Lipid-anchor, GPI-anchor.                                                                                                                                                                                                                                                                                                                                                                                                                               | * | 0 |
| Q10589 |     |     |    |     |     | 11  |    |     |    | Bone marrow stromal antigen 2 precursor, BST-2, CD317 antigen, HM1.24 antigen                                                                                                                         | Golgi apparatus, trans-Golgi network (By similarity). Cell membrane; Single-pass type II membrane protein. Cell membrane; Lipid-anchor, GPI-anchor.                                                                                                                                                                                                                                                                                                                    | * | 1 |

## Total Protein Identified

|        |    |    |    |    |    |     |     |    |    |                                                                                                                                                                                                                                                               |                                                                                                                                                                                                                                  |   |   |
|--------|----|----|----|----|----|-----|-----|----|----|---------------------------------------------------------------------------------------------------------------------------------------------------------------------------------------------------------------------------------------------------------------|----------------------------------------------------------------------------------------------------------------------------------------------------------------------------------------------------------------------------------|---|---|
| Q12805 |    |    |    |    | 45 |     |     |    |    | EGF-containing fibulin-like extracellular matrix protein 1 precursor, Fibulin-3, FIBL-3, Fibrillin-like protein, Extracellular protein S1-5                                                                                                                   | Secreted.                                                                                                                                                                                                                        | * | 0 |
| Q12841 |    |    |    |    |    | 27  | 11  |    |    | Follistatin-related protein 1 precursor, Follistatin-like 1                                                                                                                                                                                                   | Secreted (Potential).                                                                                                                                                                                                            | * | 0 |
| Q12907 |    |    |    | 4  |    |     |     |    |    | Vesicular integral-membrane protein VIP36 precursor, Lectin mannose-binding 2, Glycoprotein GP36b                                                                                                                                                             | Endoplasmic reticulum-Golgi intermediate compartment membrane; Single-pass type I membrane protein. Golgi apparatus membrane; Single-pass membrane protein. Endoplasmic reticulum membrane; Single-pass type I membrane protein. | * | 1 |
| Q13308 |    | 10 |    |    | 8  | 6   |     |    |    | Tyrosine-protein kinase-like 7 precursor, Colon carcinoma kinase 4, CCK-4                                                                                                                                                                                     | Membrane; Single-pass type I membrane protein.                                                                                                                                                                                   | * | 1 |
| Q13449 |    |    |    |    |    |     |     | 10 |    | Limbic system-associated membrane protein precursor, LSAMP                                                                                                                                                                                                    | Cell membrane; Lipid-anchor, GPI-anchor.                                                                                                                                                                                         | * | 0 |
| Q13641 |    |    |    | 7  | 9  | 7   | 32  |    | 14 | Trophoblast glycoprotein precursor, 5T4 oncofetal trophoblast glycoprotein, 5T4 oncotrophoblast glycoprotein, 5T4 oncofetal antigen, M6P1                                                                                                                     | Membrane; Single-pass type I membrane protein (Potential).                                                                                                                                                                       | * | 1 |
| Q13740 | 12 | 6  |    | 26 | 92 | 206 | 539 |    | 9  | CD166 antigen precursor, Activated leukocyte cell adhesion molecule                                                                                                                                                                                           | Membrane; Single-pass type I membrane protein.                                                                                                                                                                                   | * | 1 |
| Q13751 | 10 | 8  |    |    |    |     |     |    |    | Laminin subunit beta-3 precursor, Laminin 5 beta 3, Laminin B1 chain, Kalinin B1 chain                                                                                                                                                                        | Secreted, extracellular space, extracellular matrix, basement membrane.                                                                                                                                                          | * | 0 |
| Q13753 | 6  |    |    |    |    |     |     |    |    | Laminin subunit gamma-2 precursor, Laminin 5 gamma 2 subunit, Kalinin/nicein/epiligrin 100 kDa subunit, Laminin B2t chain, Cell-scattering factor 140 kDa subunit, CSF 140 kDa subunit, Large adhesive scatter factor 140 kDa subunit, Ladsin 140 kDa subunit | Secreted, extracellular space, extracellular matrix, basement membrane. Note=Major component.                                                                                                                                    | * | 0 |
| Q14108 | 8  | 4  |    |    |    |     |     |    |    | Lysosome membrane protein 2, Lysosome membrane protein II, LIMP II, Scavenger receptor class B member 2, 85 kDa lysosomal membrane sialoglycoprotein, LGP85, CD36 antigen-like 2                                                                              | Lysosome membrane; Multi-pass membrane protein.                                                                                                                                                                                  | * | 2 |
| Q14118 |    | 3  |    |    |    |     |     |    | 8  | Dystroglycan precursor, Dystrophin-associated glycoprotein 1                                                                                                                                                                                                  | Alpha-dystroglycan: Secreted, extracellular space., Beta-dystroglycan: Cell membrane; Single-pass type I membrane protein.                                                                                                       | * | 1 |
| Q14126 |    | 13 |    | 11 | 35 |     |     |    |    | Desmoglein-2 precursor, HDGC                                                                                                                                                                                                                                  | Cell membrane; Single-pass type I membrane protein. Cell junction, desmosome.                                                                                                                                                    | * | 1 |
| Q14508 |    |    |    | 17 | 40 |     |     |    |    | WAP four-disulfide core domain protein 2 precursor, Major epididymis-specific protein E4, Epididymal secretory protein E4, Putative protease inhibitor WAP5                                                                                                   | Secreted.                                                                                                                                                                                                                        | * | 0 |
| Q14697 | 6  | 6  | 23 | 37 |    |     |     |    | 7  | Neutral alpha-glucosidase AB precursor, Glucosidase II subunit alpha, Alpha-glucosidase 2                                                                                                                                                                     | Endoplasmic reticulum (By similarity). Golgi apparatus (By similarity). Melanosome. Note=Identified by mass spectrometry in melanosome fractions from stage I to stage IV.                                                       | * | 0 |
| Q14956 |    |    | 19 |    |    |     |     |    |    | Transmembrane glycoprotein NMB precursor, Transmembrane glycoprotein HGFIN                                                                                                                                                                                    | Membrane; Single-pass type I membrane protein (Potential). Melanosome. Note=Identified by mass spectrometry in melanosome fractions from stage I to stage IV.                                                                    | * | 1 |



## Total Protein Identified

|        |    |    |     |     |    |    |    |     |    |                                                                                                                                                                                                             |                                                                                                                                                                                                                                                                                                                               |   |    |
|--------|----|----|-----|-----|----|----|----|-----|----|-------------------------------------------------------------------------------------------------------------------------------------------------------------------------------------------------------------|-------------------------------------------------------------------------------------------------------------------------------------------------------------------------------------------------------------------------------------------------------------------------------------------------------------------------------|---|----|
| Q15223 |    | 5  |     |     |    |    |    |     |    | Poliovirus receptor-related protein 1 precursor, Herpes virus entry mediator C, HveC, Nectin-1, Herpesvirus Ig-like receptor, HlgR, CD111 antigen                                                           | Isoform Alpha: Cell membrane; Single-pass type I membrane protein., Isoform Delta: Cell membrane; Single-pass type I membrane protein., Isoform Gamma: Secreted.                                                                                                                                                              | * | 1  |
| Q15262 |    | 5  |     |     | 2  | 14 |    |     |    | Receptor-type tyrosine-protein phosphatase kappa precursor, Protein-tyrosine phosphatase kappa, R-PTP-kappa                                                                                                 | Cell junction, adherens junction; Single-pass type I membrane protein.                                                                                                                                                                                                                                                        | * | 1  |
| Q15293 |    | 5  |     | 34  | 21 |    |    |     | 29 | Reticulocalbin-1 precursor                                                                                                                                                                                  | Endoplasmic reticulum lumen.                                                                                                                                                                                                                                                                                                  | * | 0  |
| Q15758 | 16 | 6  | 6   |     | 2  |    | 6  | 6   | 8  | Neutral amino acid transporter B(0), ATB(0), Solute carrier family 1 member 5, Sodium-dependent neutral amino acid transporter type 2, RD114/simian type D retrovirus receptor, Baboon M7 virus receptor    | Membrane; Multi-pass membrane protein (Probable). Melanosome. Note=Identified by mass spectrometry in melanosome fractions from stage I to stage IV.                                                                                                                                                                          | * | 10 |
| Q16270 |    |    |     |     | 9  | 69 | 99 | 108 |    | Insulin-like growth factor-binding protein 7 precursor, IGFBP-7, IBP-7, IGF-binding protein 7, MAC25 protein, Prostacyclin-stimulating factor, PGI2-stimulating factor, IGFBP-rP1                           | Secreted.                                                                                                                                                                                                                                                                                                                     | * | 0  |
| Q16363 |    |    | 52  | 55  |    |    |    |     | 6  | Laminin subunit alpha-4 precursor                                                                                                                                                                           | Secreted, extracellular space, extracellular matrix, basement membrane. Note=Major component.                                                                                                                                                                                                                                 | * | 0  |
| Q16563 | 4  |    |     |     |    |    |    |     |    | Synaptophysin-like protein 1, Pantophysin                                                                                                                                                                   | Cytoplasmic vesicle membrane; Multi-pass membrane protein (By similarity). Melanosome. Note=Cytoplasmic transport vesicles (By similarity). Identified by mass spectrometry in melanosome fractions from stage I to stage IV.                                                                                                 | * | 4  |
| Q16610 |    |    | 270 | 122 | 2  |    |    |     |    | Extracellular matrix protein 1 precursor, Secretory component p85                                                                                                                                           | Secreted, extracellular space, extracellular matrix.                                                                                                                                                                                                                                                                          | * | 0  |
| Q16651 |    | 5  |     |     |    | 7  |    |     |    | Prostasin precursor, Serine protease 8                                                                                                                                                                      | Prostasin: Cell membrane; Single-pass membrane protein., Prostasin light chain: Secreted, extracellular space. Note=Found in the seminal fluid. Secreted after cleavage of its C-terminus., Prostasin heavy chain: Secreted, extracellular space. Note=Found in the seminal fluid. Secreted after cleavage of its C-terminus. | * | 1  |
| Q16787 | 24 | 12 |     |     |    |    |    |     |    | Laminin subunit alpha-3 precursor, Epiligrin 170 kDa subunit, E170, Nicein subunit alpha                                                                                                                    | Secreted, extracellular space, extracellular matrix, basement membrane. Note=Major component.                                                                                                                                                                                                                                 | * | 0  |
| Q16790 | 6  | 32 |     |     |    |    |    |     |    | Carbonic anhydrase 9 precursor, Carbonic anhydrase IX, Carbonate dehydratase IX, CA-IX, CAIX, Membrane antigen MN, P54/58N, Renal cell carcinoma-associated antigen G250, RCC-associated antigen G250, pMW1 | Nucleus. Nucleus, nucleolus. Cell membrane; Single-pass type I membrane protein. Cell projection, microvillus membrane; Single-pass type I membrane protein. Note=Found on the surface microvilli and in the nucleus, particularly in nucleolus.                                                                              | * | 1  |

Total Protein Identified

|        |    |    |     |     |    |    |    |    |    |     |                                                                                 |                                                                                                                                                                                     |                                                                                                                                                                                                                                                                                                                                                                    |   |    |
|--------|----|----|-----|-----|----|----|----|----|----|-----|---------------------------------------------------------------------------------|-------------------------------------------------------------------------------------------------------------------------------------------------------------------------------------|--------------------------------------------------------------------------------------------------------------------------------------------------------------------------------------------------------------------------------------------------------------------------------------------------------------------------------------------------------------------|---|----|
| Q5ZPR3 | 10 | 5  | 4   |     | 9  | 26 | 16 | 40 |    | 48  | CD276 antigen precursor, Costimulatory molecule, B7 homolog 3, B7-H3, 4Ig-B7-H3 | Membrane; Single-pass type I membrane protein (Probable).                                                                                                                           | *                                                                                                                                                                                                                                                                                                                                                                  | 1 |    |
| Q6EMK4 |    |    |     |     | 19 | 89 | 2  | 14 | 5  | 25  | Vasorin precursor, Protein slit-like 2                                          | Membrane; Single-pass type I membrane protein (Probable). Secreted.                                                                                                                 | *                                                                                                                                                                                                                                                                                                                                                                  | 1 |    |
| Q6UVK1 | 5  | 28 | 294 | 531 |    |    |    |    |    | 143 | 294                                                                             | Chondroitin sulfate proteoglycan 4 precursor, Chondroitin sulfate proteoglycan NG2, Melanoma chondroitin sulfate proteoglycan, Melanoma-associated chondroitin sulfate proteoglycan | Apical cell membrane; Single-pass type I membrane protein (By similarity). Cell projection, lamellipodium (By similarity). Note=Localized at the apical plasma membrane it relocalizes to the lamellipodia of astrocytoma upon phosphorylation by PRKCA. Localizes to the retraction fibers. Localizes to the plasma membrane of oligodendrocytes (By similarity). | * | 1  |
| Q7Z3B1 |    |    |     |     |    |    | 2  |    |    |     |                                                                                 | Neuronal growth regulator 1 precursor                                                                                                                                               | Cell membrane; Lipid-anchor, GPI-anchor (By similarity).                                                                                                                                                                                                                                                                                                           | * | 0  |
| Q86UP2 |    |    |     |     | 3  |    |    |    |    |     |                                                                                 | Kinectin, Kinesin receptor, CG-1 antigen                                                                                                                                            | Endoplasmic reticulum membrane; Single-pass type II membrane protein. Note=Vesicle membrane protein anchored to the endoplasmic reticulum.                                                                                                                                                                                                                         | * | 1  |
| Q86YB8 |    |    | 22  | 24  |    |    |    |    |    |     |                                                                                 | ERO1-like protein beta precursor, ERO1-Lbeta, Oxidoreductin-1-Lbeta, Endoplasmic oxidoreductin-1-like protein B                                                                     | Endoplasmic reticulum membrane; Peripheral membrane protein; Luminal side. Note=The association with TXNDC4 may be essential for its retention in the endoplasmic reticulum.                                                                                                                                                                                       | * | 0  |
| Q8IWA5 |    |    |     |     | 10 | 10 |    |    |    |     |                                                                                 | Choline transporter-like protein 2, Solute carrier family 44 member 2                                                                                                               | Membrane; Multi-pass membrane protein (By similarity).                                                                                                                                                                                                                                                                                                             | * | 10 |
| Q8IZP9 |    |    |     |     | 6  | 14 |    |    |    |     |                                                                                 | G-protein coupled receptor 64 precursor, Epididymis-specific protein 6, He6 receptor                                                                                                | Cell membrane; Multi-pass membrane protein.                                                                                                                                                                                                                                                                                                                        | * | 7  |
| Q8N2G4 |    |    |     |     |    |    | 6  |    |    |     |                                                                                 | Ly6/PLAUR domain-containing protein 1 precursor, Putative HeLa tumor suppressor, PHTS                                                                                               | Cell membrane; Lipid-anchor, GPI-anchor (Potential).                                                                                                                                                                                                                                                                                                               | * | 0  |
| Q8N474 |    |    | 21  |     |    |    |    |    |    |     |                                                                                 | Secreted frizzled-related protein 1 precursor, sFRP-1, Frizzled-related protein 1, FRP-1, Secreted apoptosis-related protein 2, SARP-2                                              | Secreted. Note=Cell membrane or extracellular matrix-associated. Released by heparin-binding.                                                                                                                                                                                                                                                                      | * | 0  |
| Q8NBJ4 | 4  | 6  |     |     |    |    |    |    |    |     |                                                                                 | Golgi membrane protein 1, Golgi phosphoprotein 2, Golgi membrane protein GP73                                                                                                       | Golgi apparatus, cis-Golgi network membrane; Single-pass type II membrane protein. Note=Early Golgi. Cycles via the cell surface and endosomes upon luminal pH disruption.                                                                                                                                                                                         | * | 1  |
| Q8NBJ7 | 12 | 50 | 106 | 62  | 7  | 78 | 59 | 29 |    | 9   |                                                                                 | Sulfatase-modifying factor 2 precursor, C-alpha-formylglycine-generating enzyme 2                                                                                                   | Endoplasmic reticulum lumen.                                                                                                                                                                                                                                                                                                                                       | * | 0  |
| Q8NBK3 |    |    |     |     |    |    | 13 |    |    |     |                                                                                 | Sulfatase-modifying factor 1 precursor, C-alpha-formylglycine-generating enzyme 1                                                                                                   | Endoplasmic reticulum lumen.                                                                                                                                                                                                                                                                                                                                       | * | 0  |
| Q8NCC3 |    |    | 2   |     | 19 | 12 | 30 | 37 | 10 |     |                                                                                 | 1-O-acylceramide synthase precursor, ACS, Lysosomal phospholipase A2, Lysophospholipase 3, LPLA2, LCAT-like lysophospholipase, LLPL                                                 | Lysosome (By similarity). Secreted.                                                                                                                                                                                                                                                                                                                                | * | 0  |

## Total Protein Identified

|        |    |    |     |    |    |    |    |    |    |                                                                                                                                                                                                                                                     |                                                                                                                                                                        |                                                                      |   |   |
|--------|----|----|-----|----|----|----|----|----|----|-----------------------------------------------------------------------------------------------------------------------------------------------------------------------------------------------------------------------------------------------------|------------------------------------------------------------------------------------------------------------------------------------------------------------------------|----------------------------------------------------------------------|---|---|
| Q8NFJ5 |    |    |     |    | 13 |    |    |    |    | Retinoic acid-induced protein 3, G-protein coupled receptor family C group 5 member A, Retinoic acid-induced gene 1 protein, RAIG-1, Orphan G-protein-coupling receptor PEIG-1                                                                      | Cell membrane; Multi-pass membrane protein. Cytoplasmic vesicle membrane; Multi-pass membrane protein. Note=Localized in the plasma membrane and perinuclear vesicles. | *                                                                    | 7 |   |
| Q8TCT9 |    |    |     |    | 29 |    |    |    |    | Minor histocompatibility antigen H13, Signal peptide peptidase, Presenilin-like protein 3, hIMP1 protein                                                                                                                                            | Endoplasmic reticulum membrane; Multi-pass membrane protein (By similarity).                                                                                           | *                                                                    | 7 |   |
| Q8TEM1 |    | 2  |     |    |    |    |    |    |    | Nuclear pore membrane glycoprotein 210 precursor, POM210, Nuclear pore protein gp210                                                                                                                                                                | Nucleus, nuclear pore complex; Single-pass type I membrane protein. Endoplasmic reticulum membrane; Single-pass type I membrane protein.                               | *                                                                    | 1 |   |
| Q8WUT4 |    |    |     |    |    | 20 | 43 |    |    | Uncharacterized protein C20orf75 precursor                                                                                                                                                                                                          | Membrane; Single-pass type I membrane protein (Potential).                                                                                                             | *                                                                    | 1 |   |
| Q92484 |    |    |     |    |    | 4  | 20 |    |    | Acid sphingomyelinase-like phosphodiesterase 3a precursor, ASM-like phosphodiesterase 3a                                                                                                                                                            | Secreted (By similarity).                                                                                                                                              | *                                                                    | 0 |   |
| Q92485 | 34 | 87 |     |    | 15 | 50 |    |    |    | Acid sphingomyelinase-like phosphodiesterase 3b precursor, ASM-like phosphodiesterase 3b                                                                                                                                                            | Secreted (By similarity).                                                                                                                                              | *                                                                    | 0 |   |
| Q92542 | 2  | 2  |     |    |    |    |    |    |    | Nicastrin precursor                                                                                                                                                                                                                                 | Membrane; Single-pass type I membrane protein (Potential). Melanosome. Note=Identified by mass spectrometry in melanosome fractions from stage I to stage IV.          | *                                                                    | 1 |   |
| Q92673 |    | 4  |     |    |    |    |    |    |    | Sortilin-related receptor precursor, Sorting protein-related receptor containing LDLR class A repeats, SorLA, SorLA-1, Low-density lipoprotein receptor relative with 11 ligand-binding repeats, LDLR relative with 11 ligand-binding repeats, LR11 | Membrane; Single-pass type I membrane protein (Potential).                                                                                                             | *                                                                    | 1 |   |
| Q92692 | 5  | 22 |     |    | 10 |    |    |    | 16 | Poliiovirus receptor-related protein 2 precursor, Herpes virus entry mediator B, HveB, Nectin-2, CD112 antigen                                                                                                                                      | Cell membrane; Single-pass type I membrane protein.                                                                                                                    | *                                                                    | 1 |   |
| Q92823 |    |    |     |    | 11 |    |    |    |    | Neuronal cell adhesion molecule precursor, Nr-CAM, NgCAM-related cell adhesion molecule, Ng-CAM-related, hBravo                                                                                                                                     | Cell membrane; Single-pass type I membrane protein (Potential).                                                                                                        | *                                                                    | 1 |   |
| Q92859 |    |    |     |    |    |    | 3  |    |    | Neogenin precursor                                                                                                                                                                                                                                  | Cell membrane; Single-pass type I membrane protein.                                                                                                                    | *                                                                    | 1 |   |
| Q92876 | 6  | 10 |     |    | 13 |    |    |    |    | Kallikrein-6 precursor, Protease M, Neurosin, Zyme, SP59, Serine protease 9, Serine protease 18                                                                                                                                                     | Secreted.                                                                                                                                                              | *                                                                    | 0 |   |
| Q92896 | 7  | 2  |     | 7  | 12 |    | 21 |    | 7  | Golgi apparatus protein 1 precursor, Golgi sialoglycoprotein MG-160, E-selectin ligand 1, ESL-1, Cysteine-rich fibroblast growth factor receptor, CFR-1                                                                                             | Golgi apparatus membrane; Single-pass type I membrane protein.                                                                                                         | *                                                                    | 1 |   |
| Q969P0 |    |    |     | 15 |    |    |    |    |    | Immunoglobulin superfamily member 8 precursor, CD81 partner 3, Glu-Trp-Ile EWI motif-containing protein 2, EWI-2, Keratinocytes-associated transmembrane protein 4, KCT-4, LIR-D1, CD316 antigen                                                    | Membrane; Single-pass membrane protein (Potential).                                                                                                                    | *                                                                    | 1 |   |
| Q96AY3 |    |    | 102 | 85 | 7  | 79 | 68 | 20 | 4  | 10                                                                                                                                                                                                                                                  | FK506-binding protein 10 precursor, Peptidyl-prolyl cis-trans isomerase, PPIase, Rotamase, 65 kDa FK506-binding protein, FKBP65, Immunophilin FKBP65                   | Endoplasmic reticulum lumen (By similarity).                         | * | 0 |
| Q96CG8 |    |    | 30  | 36 |    |    |    |    |    |                                                                                                                                                                                                                                                     | Collagen triple helix repeat-containing protein 1 precursor, NMTC1 protein                                                                                             | Secreted, extracellular space, extracellular matrix (By similarity). | * | 0 |
| Q96D15 |    |    | 5   | 39 | 5  |    |    |    |    |                                                                                                                                                                                                                                                     | Reticulocalbin-3 precursor, EF-hand calcium-binding protein RLP49                                                                                                      | Endoplasmic reticulum lumen (Potential).                             | * | 0 |
| Q96D42 |    |    |     |    |    | 18 | 31 |    |    |                                                                                                                                                                                                                                                     | Hepatitis A virus cellular receptor 1 precursor, HAVcr-1, T-cell immunoglobulin and mucin domain-containing protein 1, TIMD-1, T-cell membrane protein 1, TIM-1, TIM   | Membrane; Single-pass type I membrane protein (Probable).            | * | 1 |

## Total Protein Identified

|        |    |    |     |    |    |     |    |    |    |    |                                                                                                                                                                                                                                  |                                                                                                                                                                                                                                                                                                                                                                                          |   |   |
|--------|----|----|-----|----|----|-----|----|----|----|----|----------------------------------------------------------------------------------------------------------------------------------------------------------------------------------------------------------------------------------|------------------------------------------------------------------------------------------------------------------------------------------------------------------------------------------------------------------------------------------------------------------------------------------------------------------------------------------------------------------------------------------|---|---|
| Q96JB6 |    |    | 12  |    |    |     |    |    |    |    | Lysyl oxidase homolog 4 precursor, Lysyl oxidase-like protein 4, Lysyl oxidase-related protein C                                                                                                                                 | Secreted, extracellular space (Potential).                                                                                                                                                                                                                                                                                                                                               | * | 0 |
| Q96PD2 |    |    |     |    |    | 3   | 9  | 13 |    | 6  | Discoidin, CUB and LCCL domain-containing protein 2 precursor, Endothelial and smooth muscle cell-derived neuropilin-like protein, CUB, LCCL and coagulation factor V/VIII-homology domains protein 1                            | Membrane; Single-pass type I membrane protein.                                                                                                                                                                                                                                                                                                                                           | * | 1 |
| Q99519 | 7  | 21 |     | 8  | 47 | 126 | 46 | 59 | 45 | 52 | Sialidase-1 precursor, Lysosomal sialidase, N-acetyl-alpha-neuraminidase 1, Acetylneuraminyl hydrolase, G9 sialidase                                                                                                             | Lysosome membrane; Peripheral membrane protein; Luminal side. Lysosome lumen. Cell membrane. Cytoplasmic vesicle. Note=Localized not only on the inner side of the lysosomal membrane and in the lysosomal lumen, but also on the plasma membrane and in intracellular vesicles.                                                                                                         | * | 0 |
| Q99523 |    | 3  |     |    |    |     |    |    |    |    | Sortilin precursor, Neurotensin receptor 3, NTR3, NT3, Glycoprotein 95, Gp95, 100 kDa NT receptor                                                                                                                                | Membrane; Single-pass type I membrane protein. Note=Localized to membranes of the endoplasmic reticulum, endosomes, Golgi stack, lysosomes and nucleus. A small fraction of the protein is also localized to the plasma membrane. May also be found in SLC2A4/GLUT4 storage vesicles (GSVs) in adipocytes. Localization to the plasma membrane in adipocytes may be enhanced by insulin. | * | 1 |
| Q99538 | 15 | 25 | 29  | 20 | 10 | 23  | 22 | 24 |    |    | Legumain precursor, Asparaginyl endopeptidase, Protease, cysteine 1                                                                                                                                                              | Lysosome (By similarity).                                                                                                                                                                                                                                                                                                                                                                | * | 0 |
| Q99715 |    |    |     |    |    | 27  |    | 4  |    |    | Collagen alpha-1(XII) chain precursor                                                                                                                                                                                            | Secreted, extracellular space, extracellular matrix (By similarity).                                                                                                                                                                                                                                                                                                                     | * | 0 |
| Q99988 | 12 | 16 | 404 | 42 |    | 12  |    |    |    |    | Growth/differentiation factor 15 precursor, GDF-15, Placental bone morphogenetic protein, Placental TGF-beta, Macrophage inhibitory cytokine 1, MIC-1, Prostate differentiation factor, NSAID-regulated protein 1, NRG-1         | Secreted (Probable).                                                                                                                                                                                                                                                                                                                                                                     | * | 0 |
| Q9BRK5 |    |    |     | 2  | 17 |     |    |    |    |    | 45 kDa calcium-binding protein precursor, Cab45, Stromal cell-derived factor 4, SDF-4                                                                                                                                            | Golgi apparatus lumen (By similarity).                                                                                                                                                                                                                                                                                                                                                   | * | 0 |
| Q9BVK6 |    |    |     |    |    |     |    |    |    | 10 | Transmembrane emp24 domain-containing protein 9 precursor, Glycoprotein 25L2                                                                                                                                                     | Endoplasmic reticulum membrane; Single-pass type I membrane protein (By similarity).                                                                                                                                                                                                                                                                                                     | * | 1 |
| Q9GZM7 | 20 | 6  |     |    |    |     |    | 10 |    |    | Tubulointerstitial nephritis antigen-like precursor, Tubulointerstitial nephritis antigen-related protein, TIN Ag-related protein, TIN-Ag-RP, Glucocorticoid-inducible protein 5, Oxidized LDL-responsive gene 2 protein, OLRG-2 | Secreted.                                                                                                                                                                                                                                                                                                                                                                                | * | 0 |
| Q9H173 |    |    |     | 6  |    | 5   |    |    |    |    | Nucleotide exchange factor SIL1 precursor, BiP-associated protein, BAP                                                                                                                                                           | Endoplasmic reticulum lumen.                                                                                                                                                                                                                                                                                                                                                             | * | 0 |
| Q9H3G5 | 42 | 47 |     |    | 12 | 29  |    |    |    | 5  | Probable serine carboxypeptidase CPVL precursor, Carboxypeptidase, vitellogenic-like, Vitellogenic carboxypeptidase-like protein, VCP-like protein, HVLP                                                                         | Entry not found!                                                                                                                                                                                                                                                                                                                                                                         | * | 0 |

Total Protein Identified

|        |    |    |    |    |    |    |    |    |    |    |                                                                                                                                                                                                                           |                                                                                                                                                                                          |   |   |
|--------|----|----|----|----|----|----|----|----|----|----|---------------------------------------------------------------------------------------------------------------------------------------------------------------------------------------------------------------------------|------------------------------------------------------------------------------------------------------------------------------------------------------------------------------------------|---|---|
| Q9H5V8 | 4  | 4  |    |    |    |    | 3  |    |    |    | CUB domain-containing protein 1 precursor, Transmembrane and associated with src kinases, Membrane glycoprotein gp140, Subtractive immunization M plus HEp3-associated 135 kDa protein, SIMA135, CD318 antigen            | Isoform 1: Cell membrane; Single-pass membrane protein (Potential). Note=Shedding may also lead to a soluble peptide., Isoform 3: Secreted.                                              | * | 1 |
| Q9HAT2 | 40 | 44 | 24 |    | 65 | 59 | 26 | 64 |    |    | Sialate O-acetyltransferase precursor, Sialic acid-specific 9-O-acetyltransferase, H-Lse                                                                                                                                  | Lysosome (Probable).                                                                                                                                                                     | * | 0 |
| Q9HB40 |    |    |    |    |    |    | 6  | 18 |    |    | Retinoid-inducible serine carboxypeptidase precursor, Serine carboxypeptidase 1                                                                                                                                           | Secreted (Potential).                                                                                                                                                                    | * | 0 |
| Q9HDC9 | 5  | 10 |    | 7  |    |    | 2  |    |    |    | Adipocyte plasma membrane-associated protein, BSCv protein                                                                                                                                                                | Membrane; Single-pass type II membrane protein (Potential).                                                                                                                              | * | 1 |
| Q9NPH3 |    |    |    | 8  |    |    |    |    |    |    | Interleukin-1 receptor accessory protein precursor, IL-1 receptor accessory protein, IL-1RAcP                                                                                                                             | Isoform 1: Cell membrane; Single-pass type I membrane protein., Isoform 2: Secreted., Isoform 3: Secreted., Isoform 4: Secreted.                                                         | * | 1 |
| Q9NPR2 |    | 3  |    |    |    |    |    |    |    |    | Semaphorin-4B precursor                                                                                                                                                                                                   | Membrane; Single-pass type I membrane protein.                                                                                                                                           | * | 1 |
| Q9NYU2 | 4  | 6  | 25 | 20 |    |    |    |    |    |    | UDP-glucose:glycoprotein glucosyltransferase 1 precursor, UDP-glucose ceramide glucosyltransferase-like 1, UDP--Glc:glycoprotein glucosyltransferase, HUGT1                                                               | Endoplasmic reticulum lumen. Endoplasmic reticulum-Golgi intermediate compartment.                                                                                                       | * | 0 |
| Q9P2B2 | 9  | 10 | 15 | 4  |    | 13 | 5  |    | 6  |    | Prostaglandin F2 receptor negative regulator precursor, Prostaglandin F2-alpha receptor regulatory protein, Prostaglandin F2-alpha receptor-associated protein, CD9 partner 1, CD9P-1, CD315 antigen                      | Endoplasmic reticulum membrane; Single-pass type I membrane protein (By similarity). Golgi apparatus, trans-Golgi network membrane; Single-pass type I membrane protein (By similarity). | * | 1 |
| Q9UBG0 |    |    |    | 27 | 31 | 74 | 11 | 72 |    | 43 | Macrophage mannose receptor 2 precursor, Urokinase receptor-associated protein, Endocytic receptor 180, CD280 antigen                                                                                                     | Membrane; Single-pass type I membrane protein.                                                                                                                                           | * | 1 |
| Q9UBP4 |    |    |    |    |    |    |    |    | 6  |    | Dickkopf-related protein 3 precursor, Dickkopf-3, Dkk-3, hDkk-3                                                                                                                                                           | Secreted.                                                                                                                                                                                | * | 0 |
| Q9UBS4 | 4  | 13 |    | 22 |    | 7  |    |    | 6  |    | DnaJ homolog subfamily B member 11 precursor, ER-associated dnaJ protein 3, ERj3p, ERdj3, ER-associated Hsp40 co-chaperone, ER-associated DNAJ, HEDJ, hDj9, PWP1-interacting protein 4, APOBEC1-binding protein 2, ABBP-2 | Endoplasmic reticulum lumen. Note=Associated with the ER membrane in a C-terminally epitope-tagged construct.                                                                            | * | 0 |
| Q9UHG3 | 11 | 11 | 11 |    |    | 21 | 7  | 64 |    | 27 | Prenylcysteine oxidase 1 precursor, Prenylcysteine lyase                                                                                                                                                                  | Lysosome.                                                                                                                                                                                | * | 0 |
| Q9UM22 |    |    | 18 | 14 | 43 | 55 | 54 | 59 | 26 | 23 | Mammalian ependymin-related protein 1 precursor, MERP-1, Upregulated in colorectal cancer gene 1 protein                                                                                                                  | Secreted.                                                                                                                                                                                | * | 0 |
| Q9UMF0 |    |    |    |    | 2  | 15 |    |    |    |    | Intercellular adhesion molecule 5 precursor, ICAM-5, Telencephalin                                                                                                                                                        | Membrane; Single-pass type I membrane protein.                                                                                                                                           | * | 1 |
| Q9UMR5 | 3  | 2  |    |    | 8  | 18 | 5  | 32 |    |    | Lysosomal thioesterase PPT2 precursor, PPT-2, S-thioesterase G14                                                                                                                                                          | Lysosome.                                                                                                                                                                                | * | 0 |
| Q9UNN8 |    |    |    |    |    |    | 5  |    |    |    | Endothelial protein C receptor precursor, Endothelial cell protein C receptor, Activated protein C receptor, APC receptor, CD201 antigen                                                                                  | Membrane; Single-pass type I membrane protein.                                                                                                                                           | * | 1 |
| Q9UNW1 | 36 | 41 | 13 | 8  |    | 19 | 2  | 22 |    |    | Multiple inositol polyphosphate phosphatase 1 precursor, Inositol (1,3,4,5)-tetrakisphosphate 3-phosphatase, Ins(1,3,4,5)P(4) 3-phosphatase                                                                               | Endoplasmic reticulum lumen (By similarity).                                                                                                                                             | * | 0 |

Total Protein Identified

|        |     |    |     |     |     |    |     |    |     |     |                                                                                                                                                                                                                 |                                                                                                                                                                                                                                                                                                                                                                                         |   |   |
|--------|-----|----|-----|-----|-----|----|-----|----|-----|-----|-----------------------------------------------------------------------------------------------------------------------------------------------------------------------------------------------------------------|-----------------------------------------------------------------------------------------------------------------------------------------------------------------------------------------------------------------------------------------------------------------------------------------------------------------------------------------------------------------------------------------|---|---|
| Q9Y251 | 2   | 7  |     |     |     |    |     |    |     |     | Heparanase precursor, Heparanase-1, Hpa1, Endo-glucuronidase                                                                                                                                                    | Lysosome membrane; Peripheral membrane protein. Secreted. Note=Secreted, internalised and transferred to late endosomes/lysosomes as a proheparanase. In lysosomes, it is processed into the active form, the heparanase. The uptake or internalisation of proheparanase is mediated by HSPGs. Heparin appears to be a competitor and retain proheparanase in the extracellular medium. | * | 0 |
| Q9Y2E5 |     | 13 |     |     | 27  | 17 | 36  | 47 |     |     | Epididymis-specific alpha-mannosidase precursor, Mannosidase alpha class 2B member 2                                                                                                                            | Secreted (Potential).                                                                                                                                                                                                                                                                                                                                                                   | * | 0 |
| Q9Y2G5 |     |    | 9   | 35  |     |    |     |    |     |     | GDP-fucose protein O-fucosyltransferase 2 precursor, Peptide-O-fucosyltransferase 2, O-FucT-2                                                                                                                   | Endoplasmic reticulum (By similarity).                                                                                                                                                                                                                                                                                                                                                  | * | 0 |
| Q9Y3B3 |     |    |     | 11  |     |    | 3   |    |     |     | Transmembrane emp24 domain-containing protein 7 precursor                                                                                                                                                       | Endoplasmic reticulum membrane; Single-pass type I membrane protein (By similarity).                                                                                                                                                                                                                                                                                                    | * | 1 |
| Q9Y5Y6 | 37  | 53 |     |     |     |    |     |    |     |     | Suppressor of tumorigenicity protein 14, Serine protease 14, Matriptase, Membrane-type serine protease 1, MT-SP1, Prostamin, Serine protease TADG-15, Tumor-associated differentially-expressed gene 15 protein | Membrane; Single-pass type II membrane protein (Probable).                                                                                                                                                                                                                                                                                                                              | * | 1 |
| Q9Y624 | 2   | 3  |     |     |     |    | 12  | 9  |     |     | Junctional adhesion molecule A precursor, JAM-A, Junctional adhesion molecule 1, JAM-1, Platelet adhesion molecule 1, PAM-1, Platelet F11 receptor, CD321 antigen                                               | Cell junction, tight junction; Single-pass type I membrane protein. Note=Localized at tight junctions of both epithelial and endothelial cells.                                                                                                                                                                                                                                         | * | 1 |
| Q9Y680 |     |    |     |     |     |    | 33  | 19 |     |     | FK506-binding protein 7 precursor, Peptidyl-prolyl cis-trans isomerase, PPIase, Rotamase, FKBP-23                                                                                                               | Endoplasmic reticulum lumen (By similarity).                                                                                                                                                                                                                                                                                                                                            | * | 0 |
| Q9Y6C2 |     |    | 23  | 79  |     |    |     |    |     |     | EMILIN-1 precursor, Elastin microfibril interface-located protein 1, Elastin microfibril interfacier 1                                                                                                          | Secreted, extracellular space, extracellular matrix. Note=Found mainly at the interface between amorphous elastin and microfibrils.                                                                                                                                                                                                                                                     | * | 0 |
| O43399 | 101 | 88 | 111 | 61  | 35  | 89 | 44  | 43 | 72  | 76  | Tumor protein D54, hD54, Tumor protein D52-like 2                                                                                                                                                               | Entry not found!                                                                                                                                                                                                                                                                                                                                                                        |   | 0 |
| P00558 | 8   | 18 | 37  | 127 | 39  | 35 | 91  | 9  | 89  | 93  | Phosphoglycerate kinase 1, Primer recognition protein 2, PRP 2, Cell migration-inducing gene 10 protein                                                                                                         | Cytoplasm.                                                                                                                                                                                                                                                                                                                                                                              |   | 0 |
| P04075 | 11  | 4  | 19  | 88  | 45  | 15 | 50  | 7  | 47  | 65  | Fructose-bisphosphate aldolase A, Muscle-type aldolase, Lung cancer antigen NY-LU-1                                                                                                                             | Entry not found!                                                                                                                                                                                                                                                                                                                                                                        |   | 0 |
| P04083 | 26  | 17 | 53  | 141 | 193 | 96 | 165 | 82 | 56  | 71  | Annexin A1, Annexin-1, Annexin I, Lipocortin I, Calpactin II, Chromobindin-9, p35, Phospholipase A2 inhibitory protein                                                                                          | Nucleus (By similarity). Cytoplasm (By similarity). Cell projection, cilium (By similarity). Basolateral cell membrane (By similarity). Note=Found in the cilium, nucleus and basolateral cell membrane of ciliated cells in the tracheal endothelium (By similarity). Found in the cytoplasm of type II pneumocytes and alveolar macrophages (By similarity).                          |   | 0 |
| P04406 | 9   | 14 | 57  | 328 | 50  | 63 | 95  | 44 | 168 | 208 | Glyceraldehyde-3-phosphate dehydrogenase, GAPDH                                                                                                                                                                 | Cytoplasm. Cytoplasm, perinuclear region. Membrane. Note=Postnuclear and Perinuclear regions.                                                                                                                                                                                                                                                                                           |   | 0 |

Total Protein Identified

|        |    |    |     |     |     |     |     |     |     |     |                                                                                                                                                                                                                     |                                                                                                                                                                                                                                                                                                                                                                                                   |  |   |
|--------|----|----|-----|-----|-----|-----|-----|-----|-----|-----|---------------------------------------------------------------------------------------------------------------------------------------------------------------------------------------------------------------------|---------------------------------------------------------------------------------------------------------------------------------------------------------------------------------------------------------------------------------------------------------------------------------------------------------------------------------------------------------------------------------------------------|--|---|
| P06733 | 32 | 51 | 260 | 833 | 168 | 83  | 178 | 52  | 256 | 627 | Alpha-enolase, 2-phospho-D-glycerate hydro-lyase, Non-neural enolase, NNE, Enolase 1, Phosphopyruvate hydratase, C-myc promoter-binding protein, MBP-1, MPB-1, Plasminogen-binding protein                          | Cytoplasm. Cell membrane. Cytoplasm, myofibril, sarcomere, M-band. Note=Can translocate to the plasma membrane in either the homodimeric (alpha/alpha) or heterodimeric (alpha/gamma) form. ENO1 is localized to the M-band., Isoform MBP-1: Nucleus.                                                                                                                                             |  | 0 |
| P06748 | 17 | 24 | 60  | 44  | 41  | 60  | 69  | 34  | 36  | 62  | Nucleophosmin, NPM, Nucleolar phosphoprotein B23, Numatrin, Nucleolar protein NO38                                                                                                                                  | Nucleus, nucleolus. Note=Generally nucleolar, but is translocated to the nucleoplasm in case of serum starvation or treatment with anticancer drugs. Has been found in the cytoplasm in patients with primary acute myelogenous leukemia (AML), but not with secondary AML.                                                                                                                       |  | 0 |
| P07237 | 21 | 69 | 218 | 173 | 28  | 129 | 94  | 23  | 13  | 221 | Protein disulfide-isomerase precursor, PDI, Prolyl 4-hydroxylase subunit beta, Cellular thyroid hormone-binding protein, p55                                                                                        | Endoplasmic reticulum lumen. Melanosome. Note=Highly abundant. In some cell types, seems to be also secreted or associated with the plasma membrane, where it undergoes constant shedding and replacement from intracellular sources (Probable). Localizes near CD4-enriched regions on lymphoid cell surfaces. Identified by mass spectrometry in melanosome fractions from stage I to stage IV. |  | 0 |
| P07355 | 72 | 83 | 45  | 25  | 449 | 153 | 421 | 348 | 235 | 343 | Annexin A2, Annexin-2, Annexin II, Lipocortin II, Calpactin I heavy chain, Chromobindin-8, p36, Protein I, Placental anticoagulant protein IV, PAP-IV                                                               | Secreted, extracellular space, extracellular matrix, basement membrane. Melanosome. Note=In the lamina beneath the plasma membrane. Identified by mass spectrometry in melanosome fractions from stage I to stage IV. Translocated from the cytoplasm to the cell surface through a Golgi-independent mechanism.                                                                                  |  | 0 |
| P08758 | 57 | 66 | 36  | 63  | 99  | 29  | 46  | 87  | 155 | 240 | Annexin A5, Annexin-5, Annexin V, Lipocortin V, Endonexin II, Calphobindin I, CBP-I, Placental anticoagulant protein I, PAP-I, PP4, Thromboplastin inhibitor, Vascular anticoagulant-alpha, VAC-alpha, Anchorin CII | Entry not found!                                                                                                                                                                                                                                                                                                                                                                                  |  | 0 |
| P08865 | 29 | 10 | 21  | 118 | 62  | 24  | 71  | 37  | 157 | 155 | 40S ribosomal protein SA, Laminin receptor 1, 34/67 kDa laminin receptor, LamR, p40, Colon carcinoma laminin-binding protein, NEM/1CHD4, Multidrug resistance-associated protein MGR1-Ag                            | Cytoplasm.                                                                                                                                                                                                                                                                                                                                                                                        |  | 0 |
| P09661 | 46 | 22 | 119 | 7   | 8   | 45  | 13  | 41  | 4   | 25  | U2 small nuclear ribonucleoprotein A', U2 snRNP-A'                                                                                                                                                                  | Nucleus.                                                                                                                                                                                                                                                                                                                                                                                          |  | 0 |

## Total Protein Identified

|        |     |     |     |     |     |     |     |     |     |     |                                                                                                                                                                                                                                              |                                                                                                                                                                                                                                                                     |  |   |
|--------|-----|-----|-----|-----|-----|-----|-----|-----|-----|-----|----------------------------------------------------------------------------------------------------------------------------------------------------------------------------------------------------------------------------------------------|---------------------------------------------------------------------------------------------------------------------------------------------------------------------------------------------------------------------------------------------------------------------|--|---|
| P11021 | 185 | 228 | 335 | 370 | 176 | 565 | 222 | 85  | 154 | 645 | 78 kDa glucose-regulated protein precursor, GRP 78, Heat shock 70 kDa protein 5, Immunoglobulin heavy chain-binding protein, BiP, Endoplasmic reticulum luminal Ca(2+)-binding protein grp78                                                 | Endoplasmic reticulum lumen. Melanosome. Note=Identified by mass spectrometry in melanosome fractions from stage I to stage IV.                                                                                                                                     |  | 0 |
| P13667 | 169 | 225 | 451 | 481 | 44  | 241 | 312 | 93  | 90  | 296 | Protein disulfide-isomerase A4 precursor, Protein ERp-72, ERp72                                                                                                                                                                              | Endoplasmic reticulum lumen. Melanosome. Note=Identified by mass spectrometry in melanosome fractions from stage I to stage IV.                                                                                                                                     |  | 0 |
| P14618 | 8   | 5   | 125 | 104 | 70  | 22  | 83  | 8   | 9   | 48  | Pyruvate kinase isozymes M1/M2, Pyruvate kinase muscle isozyme, Pyruvate kinase 2/3, Cytosolic thyroid hormone-binding protein, CTHBP, THBP1                                                                                                 | Entry not found!                                                                                                                                                                                                                                                    |  | 0 |
| P22392 | 31  | 19  | 92  | 21  | 54  | 86  | 88  | 107 | 71  | 81  | Nucleoside diphosphate kinase B, NDK B, NDP kinase B, nm23-H2, C-myc purine-binding transcription factor PUF                                                                                                                                 | Cytoplasm. Nucleus.                                                                                                                                                                                                                                                 |  | 0 |
| P27797 | 30  | 41  | 153 | 124 | 44  | 176 | 75  | 63  | 28  | 217 | Calreticulin precursor, CRP55, Calregulin, HACBP, ERp60, grp60                                                                                                                                                                               | Endoplasmic reticulum lumen. Cytoplasm, cytosol. Secreted, extracellular space, extracellular matrix. Cell surface. Note=Also found in cell surface (T cells), cytosol and extracellular matrix. Associated with the lytic granules in the cytolytic T-lymphocytes. |  | 0 |
| P29401 | 15  | 2   | 84  | 75  | 3   | 20  | 44  | 6   | 14  | 46  | Transketolase, TK                                                                                                                                                                                                                            | Entry not found!                                                                                                                                                                                                                                                    |  | 0 |
| P30040 | 27  | 56  | 80  | 59  | 4   | 68  | 95  | 78  | 4   | 78  | Endoplasmic reticulum protein ERp29 precursor, ERp31, ERp28                                                                                                                                                                                  | Endoplasmic reticulum lumen. Melanosome. Note=Identified by mass spectrometry in melanosome fractions from stage I to stage IV.                                                                                                                                     |  | 0 |
| P30041 | 21  | 21  | 112 | 47  | 83  | 100 | 51  | 60  | 38  | 73  | Peroxiredoxin-6, Antioxidant protein 2, 1-Cys peroxiredoxin, 1-Cys PRX, Acidic calcium-independent phospholipase A2, aiPLA2, Non-selenium glutathione peroxidase, NSGPx, 24 kDa protein, Liver 2D page spot 40, Red blood cells page spot 12 | Cytoplasm (By similarity). Lysosome (By similarity). Cytoplasmic vesicle (By similarity). Note=And also found in lung secretory organelles (By similarity).                                                                                                         |  | 0 |
| P37802 | 12  | 7   | 14  | 19  | 69  | 62  | 106 | 31  | 55  | 47  | Transgelin-2, SM22-alpha homolog                                                                                                                                                                                                             | Entry not found!                                                                                                                                                                                                                                                    |  | 0 |
| P37837 | 61  | 25  | 39  | 21  | 40  | 29  | 28  | 41  | 52  | 48  | Transaldolase                                                                                                                                                                                                                                | Cytoplasm (Probable).                                                                                                                                                                                                                                               |  | 0 |
| P55145 | 6   | 14  | 91  | 49  | 6   | 23  | 10  | 34  | 17  | 30  | Protein ARMET precursor, Mesencephalic astrocyte-derived neurotrophic factor, MANF, Arginine-rich protein                                                                                                                                    | Secreted.                                                                                                                                                                                                                                                           |  | 0 |
| P55327 | 129 | 123 | 333 | 75  | 59  | 259 | 30  | 66  | 106 | 120 | Tumor protein D52, Protein N8                                                                                                                                                                                                                | Entry not found!                                                                                                                                                                                                                                                    |  | 0 |
| P62805 | 358 | 205 | 314 | 10  | 62  | 257 | 40  | 398 | 53  | 109 | Histone H4                                                                                                                                                                                                                                   | Nucleus.                                                                                                                                                                                                                                                            |  | 0 |
| P62937 | 20  | 37  | 92  | 103 | 60  | 103 | 80  | 19  | 46  | 72  | Peptidyl-prolyl cis-trans isomerase A, PPIase A, Rotamase A, Cyclophilin A, Cyclosporin A-binding protein                                                                                                                                    | Cytoplasm.                                                                                                                                                                                                                                                          |  | 0 |
| P62988 | 26  | 18  | 26  | 10  | 19  | 48  | 20  | 38  | 30  | 19  | Ubiquitin                                                                                                                                                                                                                                    | Cytoplasm. Nucleus.                                                                                                                                                                                                                                                 |  | 0 |
| P68104 | 79  | 51  | 211 | 68  | 89  | 437 | 140 | 182 | 59  | 261 | Elongation factor 1-alpha 1, EF-1-alpha-1, Elongation factor 1 A-1, eEF1A-1, Elongation factor Tu, EF-Tu, Leukocyte receptor cluster member 7                                                                                                | Cytoplasm.                                                                                                                                                                                                                                                          |  | 0 |
| Q01518 | 4   | 4   | 13  | 28  | 36  | 15  | 55  | 12  | 17  | 76  | Adenylyl cyclase-associated protein 1, CAP 1                                                                                                                                                                                                 | Cell membrane (By similarity).                                                                                                                                                                                                                                      |  | 0 |
| Q09666 | 8   | 4   | 22  | 9   | 26  | 43  | 264 | 163 | 91  | 100 | Neuroblast differentiation-associated protein AHNAK, Desmoyokin                                                                                                                                                                              | Nucleus.                                                                                                                                                                                                                                                            |  | 0 |
| Q15084 | 127 | 145 | 246 | 107 | 34  | 131 | 259 | 164 | 49  | 129 | Protein disulfide-isomerase A6 precursor, Protein disulfide isomerase P5, Thioredoxin domain-containing protein 7                                                                                                                            | Endoplasmic reticulum lumen (By similarity). Melanosome. Note=Identified by mass spectrometry in melanosome fractions from stage I to stage IV.                                                                                                                     |  | 0 |



## Total Protein Identified

|        |     |     |     |    |    |     |    |     |    |     |                                                                                                                                                                                                  |                                                                                                                                                                                                                                                                                                                                                                                                                                                                              |  |   |
|--------|-----|-----|-----|----|----|-----|----|-----|----|-----|--------------------------------------------------------------------------------------------------------------------------------------------------------------------------------------------------|------------------------------------------------------------------------------------------------------------------------------------------------------------------------------------------------------------------------------------------------------------------------------------------------------------------------------------------------------------------------------------------------------------------------------------------------------------------------------|--|---|
| Q6F113 | 146 | 105 | 274 | 37 | 27 | 179 | 20 | 135 | 52 | 117 | Histone H2A type 2-A, H2A.2, H2A/o                                                                                                                                                               | Nucleus.                                                                                                                                                                                                                                                                                                                                                                                                                                                                     |  | 0 |
| O00159 |     |     | 2   |    | 7  |     |    |     |    |     | Myosin-1c, Myosin I beta, MMI-beta, MM1b                                                                                                                                                         | Entry not found!                                                                                                                                                                                                                                                                                                                                                                                                                                                             |  | 0 |
| O00192 |     |     | 2   |    |    |     |    |     |    |     | Armadillo repeat protein deleted in velo-cardio-facial syndrome                                                                                                                                  | Entry not found!                                                                                                                                                                                                                                                                                                                                                                                                                                                             |  | 0 |
| O00231 |     |     | 3   |    |    |     |    |     |    |     | 26S proteasome non-ATPase regulatory subunit 11, 26S proteasome regulatory subunit S9, 26S proteasome regulatory subunit p44.5                                                                   | Entry not found!                                                                                                                                                                                                                                                                                                                                                                                                                                                             |  | 0 |
| O00299 |     |     |     | 24 | 4  |     |    |     | 22 | 22  | Chloride intracellular channel protein 1, Nuclear chloride ion channel 27, NCC27, Chloride channel ABP, Regulatory nuclear chloride ion channel protein, hRNCC                                   | Nucleus. Nucleus membrane. Cytoplasm. Cell membrane. Note=Mostly in the nucleus including in the nuclear membrane. Small amount in the cytoplasm and the plasma membrane.                                                                                                                                                                                                                                                                                                    |  | 0 |
| O00410 |     |     |     |    |    |     |    |     | 7  |     | Importin subunit beta-3, Karyopherin beta-3, Ran-binding protein 5, RanBP5                                                                                                                       | Cytoplasm. Nucleus. Nucleus, nucleolus. Note=Nucleus; nuclear rim. Found particularly in the nuclear rim and nucleolus.                                                                                                                                                                                                                                                                                                                                                      |  | 0 |
| O00487 |     |     |     | 3  |    |     |    |     |    | 4   | 26S proteasome non-ATPase regulatory subunit 14, 26S proteasome regulatory subunit rpn11, 26S proteasome-associated PAD1 homolog 1                                                               | Entry not found!                                                                                                                                                                                                                                                                                                                                                                                                                                                             |  | 0 |
| O00560 | 7   | 3   |     |    |    | 4   | 10 | 3   |    | 6   | Syntenin-1, Syndecan-binding protein 1, Melanoma differentiation-associated protein 9, MDA-9, Scaffold protein Pbp1, Pro-TGF-alpha cytoplasmic domain-interacting protein 18, TACIP18            | Cell junction, focal adhesion; Peripheral membrane protein. Cell junction, adherens junction; Peripheral membrane protein. Endoplasmic reticulum membrane; Peripheral membrane protein. Nucleus. Melanosome. Note=Mainly membrane-associated. Localized to adherens junctions, focal adhesions and endoplasmic reticulum. Colocalized with actin stress fibers. Also found in the nucleus. Identified by mass spectrometry in melanosome fractions from stage I to stage IV. |  | 0 |
| O00622 |     |     |     |    |    | 2   | 7  | 32  |    |     | Protein CYR61 precursor, Cysteine-rich angiogenic inducer 61, Insulin-like growth factor-binding protein 10, Protein GIG1                                                                        | Secreted.                                                                                                                                                                                                                                                                                                                                                                                                                                                                    |  | 0 |
| O00764 |     |     |     |    |    |     |    |     |    | 3   | Pyridoxal kinase, Pyridoxine kinase                                                                                                                                                              | Cytoplasm.                                                                                                                                                                                                                                                                                                                                                                                                                                                                   |  | 0 |
| O14818 |     |     |     |    | 7  |     | 4  |     |    | 19  | Proteasome subunit alpha type-7, Proteasome subunit RC6-1, Proteasome subunit XAPC7                                                                                                              | Cytoplasm. Nucleus.                                                                                                                                                                                                                                                                                                                                                                                                                                                          |  | 0 |
| O15173 |     |     |     |    |    |     |    |     |    | 16  | Membrane-associated progesterone receptor component 2, Progesterone membrane-binding protein, Steroid receptor protein DG6                                                                       | Membrane; Single-pass membrane protein (Potential).                                                                                                                                                                                                                                                                                                                                                                                                                          |  | 1 |
| O15212 |     |     |     |    |    |     | 17 |     |    |     | Prefoldin subunit 6, Protein Ke2                                                                                                                                                                 | Entry not found!                                                                                                                                                                                                                                                                                                                                                                                                                                                             |  | 0 |
| O15240 |     |     |     |    |    | 4   |    |     |    |     | Neurosecretory protein VGF precursor                                                                                                                                                             | Secreted (By similarity). Cytoplasmic vesicle, secretory vesicle (By similarity). Note=Stored in secretory vesicles and then secreted (By similarity).                                                                                                                                                                                                                                                                                                                       |  | 0 |
| O15446 |     |     |     |    |    | 6   |    |     |    |     | DNA-directed RNA polymerase I subunit RPA34, RNA polymerase I-associated factor PAF49, Anti-sense to ERCC-1 protein, ASE-1, CD3-epsilon-associated protein, CD3E-associated protein, CAST, A34.5 | Nucleus, nucleolus. Note=Found at the fibrillar centers of the nucleolus in interphase and during cell division it is localized to the nucleolus organizer regions of the chromosomes.                                                                                                                                                                                                                                                                                       |  | 0 |

## Total Protein Identified

|        |    |   |    |    |    |    |   |    |   |                                                                                                                                                                                                                                                             |                                                                                                                                                                                                                                                                                                                         |  |   |
|--------|----|---|----|----|----|----|---|----|---|-------------------------------------------------------------------------------------------------------------------------------------------------------------------------------------------------------------------------------------------------------------|-------------------------------------------------------------------------------------------------------------------------------------------------------------------------------------------------------------------------------------------------------------------------------------------------------------------------|--|---|
| O15511 |    |   |    |    |    | 6  |   |    |   | Actin-related protein 2/3 complex subunit 5, Arp2/3 complex 16 kDa subunit, p16-ARC                                                                                                                                                                         | Cytoplasm, cytoskeleton. Cell projection.                                                                                                                                                                                                                                                                               |  | 0 |
| O15551 | 10 |   |    |    |    |    |   |    |   | Claudin-3, Clostridium perfringens enterotoxin receptor 2, CPE-receptor 2, CPE-R 2, Ventral prostate.1 protein homolog, HRVP1                                                                                                                               | Cell junction, tight junction; Multi-pass membrane protein (By similarity).                                                                                                                                                                                                                                             |  | 4 |
| O43143 |    |   | 3  |    |    |    |   |    |   | Putative pre-mRNA-splicing factor ATP-dependent RNA helicase DHX15, DEAH box protein 15, ATP-dependent RNA helicase #46                                                                                                                                     | Nucleus.                                                                                                                                                                                                                                                                                                                |  | 0 |
| O43169 | 9  |   |    |    |    | 9  |   |    |   | Cytochrome b5 type B precursor, Cytochrome b5 outer mitochondrial membrane isoform                                                                                                                                                                          | Mitochondrion outer membrane (By similarity).                                                                                                                                                                                                                                                                           |  | 1 |
| O43175 |    |   | 4  | 13 | 3  |    |   |    |   | D-3-phosphoglycerate dehydrogenase, 3-PGDH                                                                                                                                                                                                                  | Entry not found!                                                                                                                                                                                                                                                                                                        |  | 0 |
| O43324 |    |   | 9  |    |    | 15 |   |    |   | Eukaryotic translation elongation factor 1 epsilon-1, Multisynthetase complex auxiliary component p18, Elongation factor p18                                                                                                                                | Cytoplasm. Nucleus. Note=Cytoplasmic under growth arrest conditions. Translocated into the nucleus when growth resumes (S phase) and following DNA damage.                                                                                                                                                              |  | 0 |
| O43670 | 10 | 8 |    |    |    |    |   |    |   | Zinc finger protein 207                                                                                                                                                                                                                                     | Nucleus (Probable).                                                                                                                                                                                                                                                                                                     |  | 0 |
| O43707 |    |   | 68 | 46 | 39 |    |   |    | 8 | Alpha-actinin-4, Non-muscle alpha-actinin 4, F-actin cross-linking protein                                                                                                                                                                                  | Nucleus. Cytoplasm. Note=Colocalizes with actin stress fibers. Nuclear translocation can be induced by the PI3 kinase inhibitor wortmannin or by cytochalasin D. Exclusively localized in the nucleus in a limited number of cell lines (breast cancer cell line MCF7, oral floor cancer IMC2, and bladder cancer KU7). |  | 0 |
| O43809 | 7  |   |    |    |    | 7  | 2 | 15 |   | Cleavage and polyadenylation specificity factor subunit 5, Cleavage and polyadenylation specificity factor 25 kDa subunit, CPSF 25 kDa subunit, Pre-mRNA cleavage factor Im 25 kDa subunit, Nucleoside diphosphate-linked moiety X motif 21, Nudix motif 21 | Nucleus. Note=In punctate subnuclear structures localized adjacent to nuclear speckles, called paraspeckles.                                                                                                                                                                                                            |  | 0 |
| O43854 |    |   |    |    |    |    |   | 64 |   | EGF-like repeat and discoidin I-like domain-containing protein 3 precursor, EGF-like repeats and discoidin I-like domains protein 3, Developmentally-regulated endothelial cell locus 1 protein, Integrin-binding protein DEL1                              | Secreted.                                                                                                                                                                                                                                                                                                               |  | 0 |
| O60256 |    |   |    |    |    |    |   |    | 5 | Phosphoribosyl pyrophosphate synthetase-associated protein 2, PRPP synthetase-associated protein 2, 41 kDa phosphoribosylpyrophosphate synthetase-associated protein, PAP41                                                                                 | Entry not found!                                                                                                                                                                                                                                                                                                        |  | 0 |

## Total Protein Identified

|        |    |    |    |    |    |    |    |   |    |    |                                                                                                                                                                                                            |                                                                                                                                                                                                                                                                                                                                                                                                                                                                                                                                             |  |  |   |
|--------|----|----|----|----|----|----|----|---|----|----|------------------------------------------------------------------------------------------------------------------------------------------------------------------------------------------------------------|---------------------------------------------------------------------------------------------------------------------------------------------------------------------------------------------------------------------------------------------------------------------------------------------------------------------------------------------------------------------------------------------------------------------------------------------------------------------------------------------------------------------------------------------|--|--|---|
| O60506 |    |    |    | 3  |    |    |    |   |    |    | Heterogeneous nuclear ribonucleoprotein Q, hnRNP Q, hnRNP-Q, Synaptotagmin-binding, cytoplasmic RNA-interacting protein, Glycine- and tyrosine-rich RNA-binding protein, GRY-RBP, NS1-associated protein 1 | Cytoplasm (By similarity).<br>Microsome (By similarity).<br>Nucleus (By similarity).<br>Note=The tyrosine phosphorylated form bound to RNA is found in microsomes (By similarity)., Isoform 1: Nucleus, nucleoplasm (By similarity). Note=Expressed predominantly in the nucleoplasm (By similarity)., Isoform 2: Nucleus, nucleoplasm (By similarity). Note=Expressed predominantly in the nucleoplasm (By similarity)., Isoform 3: Nucleus, nucleoplasm (By similarity). Note=Expressed predominantly in the nucleoplasm (By similarity). |  |  | 0 |
| O60664 |    | 2  |    | 10 | 51 | 14 | 23 | 8 | 34 | 98 | Mannose-6-phosphate receptor-binding protein 1, Cargo selection protein TIP47, 47 kDa mannose 6-phosphate receptor-binding protein, 47 kDa MPR-binding protein, Placental protein 17, PP17                 | Cytoplasm. Endosome.<br>Note=Membrane associated on endosomes. Detected in the envelope and the core of lipid bodies and in lipid sails.                                                                                                                                                                                                                                                                                                                                                                                                    |  |  | 0 |
| O60749 |    |    |    |    | 3  |    |    |   |    |    | Sorting nexin-2, Transformation-related gene 9 protein, TRG9                                                                                                                                               | Entry not found!                                                                                                                                                                                                                                                                                                                                                                                                                                                                                                                            |  |  | 0 |
| O60884 |    |    |    |    |    |    |    |   |    | 3  | DnaJ homolog subfamily A member 2, HIRA-interacting protein 4, Cell cycle progression restoration gene 3 protein, Dnj3, Dj3, Renal carcinoma antigen NY-REN-14                                             | Membrane; Lipid-anchor (Potential).                                                                                                                                                                                                                                                                                                                                                                                                                                                                                                         |  |  | 0 |
| O60888 | 3  | 2  |    |    | 3  |    |    |   |    |    | Protein CutA precursor, Brain acetylcholinesterase putative membrane anchor, Acetylcholinesterase-associated protein                                                                                       | Entry not found!                                                                                                                                                                                                                                                                                                                                                                                                                                                                                                                            |  |  | 0 |
| O75367 | 88 | 50 | 23 |    |    | 18 |    |   |    |    | Core histone macro-H2A.1, Histone macroH2A1, mH2A1, H2A.y, H2A/y, Medulloblastoma antigen MU-MB-50.205                                                                                                     | Nucleus. Note=Enriched in inactive X chromosome chromatin and in senescence-associated heterochromatin.                                                                                                                                                                                                                                                                                                                                                                                                                                     |  |  | 0 |

Total Protein Identified

|        |    |   |    |  |   |  |  |  |  |    |                                                                                                                                                                                                                                      |                                                                                                                                                                                                                                                                                                                                                                                                                                                                                                                                                                                                                                             |                                                                             |  |   |   |
|--------|----|---|----|--|---|--|--|--|--|----|--------------------------------------------------------------------------------------------------------------------------------------------------------------------------------------------------------------------------------------|---------------------------------------------------------------------------------------------------------------------------------------------------------------------------------------------------------------------------------------------------------------------------------------------------------------------------------------------------------------------------------------------------------------------------------------------------------------------------------------------------------------------------------------------------------------------------------------------------------------------------------------------|-----------------------------------------------------------------------------|--|---|---|
| O75369 |    |   |    |  | 3 |  |  |  |  |    | Filamin-B, FLN-B, Beta-filamin, Actin-binding-like protein, Thyroid autoantigen, Truncated actin-binding protein, Truncated ABP, ABP-280 homolog, ABP-278, Filamin 3, Filamin homolog 1, Fh1                                         | Isoform 1: Cytoplasm, cell cortex. Cytoplasm, cytoskeleton. Cytoplasm, myofibril, sarcomere, Z-disk. Note=In differentiating myotubes, isoform 1, isoform 2 and isoform 3 are localized diffusely throughout the cytoplasm with regions of enrichment at the longitudinal actin stress fiber. In differentiated tubes, isoform 1 is also detected within the Z-lines., Isoform 2: Cytoplasm, cytoskeleton. Note=Predominantly localized at actin stress fibers., Isoform 3: Cytoplasm, cytoskeleton. Note=Predominantly localized at actin stress fibers., Isoform 6: Cytoplasm, cytoskeleton. Note=Polarized at the periphery of myotubes. |                                                                             |  | 0 |   |
| O75381 |    |   |    |  |   |  |  |  |  | 7  | Peroxisomal membrane protein PEX14, Peroxisomal membrane anchor protein PEX14, Peroxin-14, PTS1 receptor-docking protein                                                                                                             | Peroxisome membrane; Peripheral membrane protein; Cytoplasmic side.                                                                                                                                                                                                                                                                                                                                                                                                                                                                                                                                                                         |                                                                             |  | 0 |   |
| O75531 | 12 |   |    |  |   |  |  |  |  |    | Barrier-to-autointegration factor, Breakpoint cluster region protein 1                                                                                                                                                               | Nucleus. Cytoplasm. Note=Significantly enriched at the nuclear inner membrane, diffusely throughout the nucleus during interphase and concentrated at the chromosomes during the M-phase. May be included in HIV-1 virions via its interaction with viral GAG polyprotein.                                                                                                                                                                                                                                                                                                                                                                  |                                                                             |  | 0 |   |
| O76021 | 14 | 7 | 22 |  |   |  |  |  |  | 20 | Ribosomal L1 domain-containing protein 1, Cellular senescence-inhibited gene protein, Protein PBK1, CATX-11                                                                                                                          | Nucleus, nucleolus.                                                                                                                                                                                                                                                                                                                                                                                                                                                                                                                                                                                                                         |                                                                             |  | 0 |   |
| O94759 |    |   |    |  |   |  |  |  |  | 2  | Transient receptor potential cation channel subfamily M member 2, Long transient receptor potential channel 2, LTrpC2, LTrpC-2, Transient receptor potential channel 7, TrpC7, Estrogen-responsive element-associated gene 1 protein | Membrane; Multi-pass membrane protein.                                                                                                                                                                                                                                                                                                                                                                                                                                                                                                                                                                                                      |                                                                             |  | 6 |   |
| O95232 |    |   | 2  |  |   |  |  |  |  | 2  | 39                                                                                                                                                                                                                                   | Cisplatin resistance-associated overexpressed protein, cAMP regulatory element-associated protein 1, CRE-associated protein 1, CREAP-1, Luc7A, Okadaic acid-inducible phosphoprotein OA48-18                                                                                                                                                                                                                                                                                                                                                                                                                                                | Nucleus speckle. Note=The subnuclear localization is affected by cisplatin. |  |   | 0 |
| O95471 | 6  | 3 |    |  |   |  |  |  |  |    |                                                                                                                                                                                                                                      | Claudin-7, CLDN-7                                                                                                                                                                                                                                                                                                                                                                                                                                                                                                                                                                                                                           | Cell junction, tight junction; Multi-pass membrane protein.                 |  |   | 4 |

## Total Protein Identified

|        |    |   |    |    |    |    |    |    |     |                                                                                                                                    |                                                                                                                                                                                                                                                                                                                                    |                                                                                                                                                              |   |    |
|--------|----|---|----|----|----|----|----|----|-----|------------------------------------------------------------------------------------------------------------------------------------|------------------------------------------------------------------------------------------------------------------------------------------------------------------------------------------------------------------------------------------------------------------------------------------------------------------------------------|--------------------------------------------------------------------------------------------------------------------------------------------------------------|---|----|
| O95573 |    |   | 3  |    |    |    |    |    |     | Long-chain-fatty-acid--CoA ligase 3, Long-chain acyl-CoA synthetase 3, LACS 3                                                      | Mitochondrion outer membrane; Single-pass type III membrane protein (By similarity). Peroxisome membrane; Single-pass type III membrane protein (By similarity). Microsome membrane; Single-pass type III membrane protein (By similarity). Endoplasmic reticulum membrane; Single-pass type III membrane protein (By similarity). |                                                                                                                                                              | 1 |    |
| O96008 |    |   |    |    |    |    |    |    | 3   | Mitochondrial import receptor subunit TOM40 homolog, Translocase of outer membrane 40 kDa subunit homolog, Protein Haymaker, p38.5 | Mitochondrion outer membrane; Multi-pass membrane protein.                                                                                                                                                                                                                                                                         |                                                                                                                                                              | 0 |    |
| P00338 |    |   | 56 | 57 | 16 |    | 41 | 4  | 20  | 50                                                                                                                                 | L-lactate dehydrogenase A chain, LDH-A, LDH muscle subunit, LDH-M, Renal carcinoma antigen NY-REN-59, Cell proliferation-inducing gene 19 protein                                                                                                                                                                                  | Cytoplasm.                                                                                                                                                   |   | 0  |
| P00390 | 14 | 4 | 3  | 2  |    | 2  | 6  | 4  |     |                                                                                                                                    | Glutathione reductase, mitochondrial precursor, GR, GRase                                                                                                                                                                                                                                                                          | Mitochondrion. Cytoplasm.                                                                                                                                    |   | 0  |
| P00441 | 3  |   |    |    |    |    |    |    |     |                                                                                                                                    | Superoxide dismutase [Cu-Zn]                                                                                                                                                                                                                                                                                                       | Cytoplasm.                                                                                                                                                   |   | 0  |
| P00492 |    |   | 5  |    | 3  |    | 25 |    | 18  | 42                                                                                                                                 | Hypoxanthine-guanine phosphoribosyltransferase, HGPRT, HGPRTase                                                                                                                                                                                                                                                                    | Cytoplasm.                                                                                                                                                   |   | 0  |
| P00918 |    | 6 |    |    | 2  |    |    |    |     |                                                                                                                                    | Carbonic anhydrase 2, Carbonic anhydrase II, Carbonate dehydratase II, CA-II, Carbonic anhydrase C, CAC                                                                                                                                                                                                                            | Cytoplasm.                                                                                                                                                   |   | 0  |
| P01034 |    |   |    |    |    |    | 4  |    |     |                                                                                                                                    | Cystatin-C precursor, Cystatin-3, Neuroendocrine basic polypeptide, Gamma-trace, Post-gamma-globulin                                                                                                                                                                                                                               | Secreted.                                                                                                                                                    |   | 0  |
| P02533 |    |   |    |    |    |    | 23 |    |     |                                                                                                                                    | Keratin, type I cytoskeletal 14, Cytokeratin-14, CK-14, Keratin-14, K14                                                                                                                                                                                                                                                            | Entry not found!                                                                                                                                             |   | 0  |
| P02545 |    | 3 |    |    | 31 | 10 |    |    | 144 | 97                                                                                                                                 | Lamin-A/C, 70 kDa lamin, Renal carcinoma antigen NY-REN-32                                                                                                                                                                                                                                                                         | Nucleus.                                                                                                                                                     |   | 0  |
| P02794 |    |   |    |    |    |    |    | 15 |     |                                                                                                                                    | Ferritin heavy chain, Ferritin H subunit, Cell proliferation-inducing gene 15 protein                                                                                                                                                                                                                                              | Entry not found!                                                                                                                                             |   | 0  |
| P04179 |    |   |    |    |    | 11 | 33 | 18 |     |                                                                                                                                    | Superoxide dismutase [Mn], mitochondrial precursor                                                                                                                                                                                                                                                                                 | Mitochondrion matrix.                                                                                                                                        |   | 0  |
| P04181 |    |   |    | 39 |    |    |    |    |     |                                                                                                                                    | Ornithine aminotransferase, mitochondrial precursor, Ornithine--oxo-acid aminotransferase                                                                                                                                                                                                                                          | Mitochondrion matrix.                                                                                                                                        |   | 0  |
| P04264 | 23 | 5 | 53 |    | 32 | 6  | 97 |    |     |                                                                                                                                    | Keratin, type II cytoskeletal 1, Cytokeratin-1, CK-1, Keratin-1, K1, 67 kDa cytokeratin, Hair alpha protein                                                                                                                                                                                                                        | Entry not found!                                                                                                                                             |   | 0  |
| P04632 |    |   |    | 11 | 23 |    | 2  |    | 19  | 29                                                                                                                                 | Calpain small subunit 1, CSS1, Calcium-dependent protease small subunit 1, Calcium-dependent protease small subunit, CDPS, Calpain regulatory subunit, Calcium-activated neutral proteinase small subunit, CANP small subunit                                                                                                      | Cytoplasm (By similarity). Cell membrane (By similarity). Note=Translocates to the plasma membrane upon calcium binding (By similarity).                     |   | 0  |
| P04792 |    |   |    | 55 | 94 | 25 | 8  |    | 86  | 215                                                                                                                                | Heat shock protein beta-1, HspB1, Heat shock 27 kDa protein, HSP 27, Stress-responsive protein 27, SRP27, Estrogen-regulated 24 kDa protein, 28 kDa heat shock protein                                                                                                                                                             | Cytoplasm. Nucleus. Note=Cytoplasmic in interphase cells. Colocalizes with mitotic spindles in mitotic cells. Translocates to the nucleus during heat shock. |   | 0  |
| P04899 |    |   |    |    | 4  |    |    |    |     |                                                                                                                                    | Guanine nucleotide-binding protein G(i), alpha-2 subunit, Adenylate cyclase-inhibiting G alpha protein                                                                                                                                                                                                                             | Entry not found!                                                                                                                                             |   | 0  |
| P05023 | 7  |   | 39 | 19 | 17 |    |    |    |     |                                                                                                                                    | Sodium/potassium-transporting ATPase subunit alpha-1 precursor, Sodium pump subunit alpha-1, Na(+)/K(+) ATPase alpha-1 subunit                                                                                                                                                                                                     | Membrane; Multi-pass membrane protein. Melanosome. Note=Identified by mass spectrometry in melanosome fractions from stage I to stage IV.                    |   | 10 |

## Total Protein Identified

|        |    |    |    |    |    |    |    |    |     |                                                                                                                                                                            |                                                                                                     |                                                                                                                                       |                                                                                                                               |   |   |
|--------|----|----|----|----|----|----|----|----|-----|----------------------------------------------------------------------------------------------------------------------------------------------------------------------------|-----------------------------------------------------------------------------------------------------|---------------------------------------------------------------------------------------------------------------------------------------|-------------------------------------------------------------------------------------------------------------------------------|---|---|
| P05141 |    |    | 5  |    |    |    |    |    |     | ADP/ATP translocase 2, Adenine nucleotide translocator 2, ANT 2, ADP,ATP carrier protein 2, Solute carrier family 25 member 5, ADP,ATP carrier protein, fibroblast isoform | Mitochondrion inner membrane; Multi-pass membrane protein.                                          |                                                                                                                                       | 6                                                                                                                             |   |   |
| P05198 |    |    | 5  |    |    |    |    |    |     | Eukaryotic translation initiation factor 2 subunit 1, Eukaryotic translation initiation factor 2 subunit alpha, eIF-2-alpha, EIF-2alpha, EIF-2A                            | Entry not found!                                                                                    |                                                                                                                                       | 0                                                                                                                             |   |   |
| P05386 |    |    | 17 |    |    |    |    |    |     | 60S acidic ribosomal protein P1                                                                                                                                            | Entry not found!                                                                                    |                                                                                                                                       | 0                                                                                                                             |   |   |
| P05387 |    |    | 16 | 8  |    |    | 7  | 14 | 9   | 60S acidic ribosomal protein P2, Renal carcinoma antigen NY-REN-44                                                                                                         | Entry not found!                                                                                    |                                                                                                                                       | 0                                                                                                                             |   |   |
| P05388 |    |    | 7  | 60 | 15 | 5  |    | 27 | 44  | 60S acidic ribosomal protein P0, L10E                                                                                                                                      | Entry not found!                                                                                    |                                                                                                                                       | 0                                                                                                                             |   |   |
| P05455 | 4  |    | 8  | 4  | 6  |    |    |    | 25  | Lupus La protein, Sjogren syndrome type B antigen, SS-B, La ribonucleoprotein, La autoantigen                                                                              | Nucleus (Probable).                                                                                 |                                                                                                                                       | 0                                                                                                                             |   |   |
| P05787 | 4  | 3  |    |    | 67 |    |    |    | 5   | Keratin, type II cytoskeletal 8, Cytokeratin-8, CK-8, Keratin-8, K8                                                                                                        | Cytoplasm.                                                                                          |                                                                                                                                       | 0                                                                                                                             |   |   |
| P06132 |    |    | 4  |    |    |    |    |    |     | Uroporphyrinogen decarboxylase, URO-D, UPD                                                                                                                                 | Cytoplasm.                                                                                          |                                                                                                                                       | 0                                                                                                                             |   |   |
| P06396 |    |    | 9  | 25 |    |    |    |    | 8   | Gelsolin precursor, Actin-depolymerizing factor, ADF, Brevin, AGEL                                                                                                         | Isoform 2: Cytoplasm, cytoskeleton., Isoform 1: Secreted.                                           |                                                                                                                                       | 0                                                                                                                             |   |   |
| P06576 |    |    | 9  | 17 | 8  | 2  |    | 37 | 280 | ATP synthase subunit beta, mitochondrial precursor                                                                                                                         | Mitochondrion. Mitochondrion inner membrane. Note=Peripheral membrane protein.                      |                                                                                                                                       | 0                                                                                                                             |   |   |
| P06703 | 3  |    |    | 18 | 4  |    | 4  | 5  | 16  | Protein S100-A6, S100 calcium-binding protein A6, Calcyclin, Prolactin receptor-associated protein, PRA, Growth factor-inducible protein 2A9, MLN 4                        | Entry not found!                                                                                    |                                                                                                                                       | 0                                                                                                                             |   |   |
| P06744 | 8  | 5  | 23 | 14 | 4  |    | 12 |    | 6   | Glucose-6-phosphate isomerase, GPI, Phosphoglucose isomerase, PGI, Phosphohexose isomerase, PHI, Neuroleukin, NLK, Sperm antigen 36, SA-36                                 | Cytoplasm.                                                                                          |                                                                                                                                       | 0                                                                                                                             |   |   |
| P06753 | 2  |    |    |    | 11 |    |    |    | 4   | Tropomyosin alpha-3 chain, Tropomyosin-3, Tropomyosin gamma, hTM5                                                                                                          | Entry not found!                                                                                    |                                                                                                                                       | 0                                                                                                                             |   |   |
| P07195 | 7  | 12 | 31 | 60 | 28 |    | 40 |    | 21  | 35                                                                                                                                                                         | L-lactate dehydrogenase B chain, LDH-B, LDH heart subunit, LDH-H, Renal carcinoma antigen NY-REN-46 | Cytoplasm.                                                                                                                            |                                                                                                                               | 0 |   |
| P07305 | 40 | 24 |    |    |    |    |    |    |     |                                                                                                                                                                            | Histone H1.0, Histone H1(0), Histone H1'                                                            | Nucleus.                                                                                                                              |                                                                                                                               | 0 |   |
| P07437 |    |    |    |    |    | 44 |    |    |     |                                                                                                                                                                            | Tubulin beta chain, Tubulin beta-5 chain                                                            | Entry not found!                                                                                                                      |                                                                                                                               | 0 |   |
| P07737 | 2  | 15 |    | 26 | 28 | 9  | 51 |    | 34  | 31                                                                                                                                                                         | Profilin-1, Profilin I                                                                              | Entry not found!                                                                                                                      |                                                                                                                               | 0 |   |
| P07900 |    |    | 25 | 32 | 21 |    | 18 |    |     | 53                                                                                                                                                                         | 96                                                                                                  | Heat shock protein HSP 90-alpha, HSP 86, Renal carcinoma antigen NY-REN-38                                                            | Cytoplasm. Melanosome. Note=Identified by mass spectrometry in melanosome fractions from stage I to stage IV.                 |   | 0 |
| P07910 |    |    |    |    | 2  |    |    |    |     |                                                                                                                                                                            |                                                                                                     | Heterogeneous nuclear ribonucleoproteins C1/C2, hnRNP C1 / hnRNP C2                                                                   | Nucleus. Note=Component of ribonucleosomes.                                                                                   |   | 0 |
| P07954 |    |    |    | 5  |    |    |    |    |     | 3                                                                                                                                                                          |                                                                                                     | Fumarate hydratase, mitochondrial precursor, Fumarase                                                                                 | Mitochondrion. Cytoplasm.                                                                                                     |   | 0 |
| P08107 |    | 4  |    | 18 | 12 |    |    |    |     | 16                                                                                                                                                                         |                                                                                                     | Heat shock 70 kDa protein 1, HSP70.1, HSP70-1/HSP70-2                                                                                 | Entry not found!                                                                                                              |   | 0 |
| P08133 |    |    | 6  |    | 4  |    |    |    |     |                                                                                                                                                                            |                                                                                                     | Annexin A6, Annexin-6, Annexin VI, Lipocortin VI, P68, P70, Protein III, Chromobindin-20, 67 kDa calelectrin, Calphobindin-II, CPB-II | Cytoplasm (By similarity). Melanosome. Note=Identified by mass spectrometry in melanosome fractions from stage I to stage IV. |   | 0 |
| P08238 |    |    | 89 | 13 | 46 | 11 |    |    | 9   | 17                                                                                                                                                                         |                                                                                                     | Heat shock protein HSP 90-beta, HSP 84, HSP 90                                                                                        | Cytoplasm. Melanosome. Note=Identified by mass spectrometry in melanosome fractions from stage I to stage IV.                 |   | 0 |
| P08670 |    |    | 42 | 47 | 49 |    |    |    | 7   | 15                                                                                                                                                                         |                                                                                                     | Vimentin                                                                                                                              | Entry not found!                                                                                                              |   | 0 |
| P08708 |    |    |    | 29 |    |    |    |    |     |                                                                                                                                                                            |                                                                                                     | 40S ribosomal protein S17                                                                                                             | Entry not found!                                                                                                              |   | 0 |
| P08727 |    |    |    |    | 43 |    |    |    |     |                                                                                                                                                                            |                                                                                                     | Keratin, type I cytoskeletal 19, Cytokeratin-19, CK-19, Keratin-19, K19                                                               | Entry not found!                                                                                                              |   | 0 |
| P08729 |    |    |    |    | 26 |    |    |    |     |                                                                                                                                                                            |                                                                                                     | Keratin, type II cytoskeletal 7, Cytokeratin-7, CK-7, Keratin-7, K7, Sarcolectin                                                      | Cytoplasm.                                                                                                                    |   | 0 |
| P08779 |    |    |    |    |    |    | 75 |    |     |                                                                                                                                                                            |                                                                                                     | Keratin, type I cytoskeletal 16, Cytokeratin-16, CK-16, Keratin-16, K16                                                               | Entry not found!                                                                                                              |   | 0 |

## Total Protein Identified

|        |    |    |    |    |    |     |     |    |    |     |                                                                                                                                                                                                                       |                                                                                                                                                                                                                       |  |   |
|--------|----|----|----|----|----|-----|-----|----|----|-----|-----------------------------------------------------------------------------------------------------------------------------------------------------------------------------------------------------------------------|-----------------------------------------------------------------------------------------------------------------------------------------------------------------------------------------------------------------------|--|---|
| P09012 | 8  | 2  |    |    |    | 7   |     |    |    |     | U1 small nuclear ribonucleoprotein A, U1 snRNP protein A, U1A protein, U1-A                                                                                                                                           | Nucleus.                                                                                                                                                                                                              |  | 0 |
| P09104 |    |    |    | 26 | 2  |     |     | 12 | 9  |     | Gamma-enolase, 2-phospho-D-glycerate hydro-lyase, Neural enolase, Neuron-specific enolase, NSE, Enolase 2                                                                                                             | Cytoplasm (By similarity). Cell membrane (By similarity). Note=Can translocate to the plasma membrane in either the homodimeric (alpha/alpha) or heterodimeric (alpha/gamma) form (By similarity).                    |  | 0 |
| P09211 | 6  | 15 | 5  | 32 | 9  | 6   | 52  |    |    |     | Glutathione S-transferase P, GST class-pi, GSTP1-1                                                                                                                                                                    | Entry not found!                                                                                                                                                                                                      |  | 0 |
| P09382 |    |    | 45 | 39 | 19 | 47  | 106 | 27 | 26 | 48  | Galectin-1, Lectin galactoside-binding soluble 1, Beta-galactoside-binding lectin L-14-I, Lactose-binding lectin 1, S-Lac lectin 1, Galaptin, 14 kDa lectin, HPL, HBL, Putative MAPK-activating protein PM12          | Entry not found!                                                                                                                                                                                                      |  | 0 |
| P09417 |    |    |    | 6  |    |     |     |    |    |     | Dihydropteridine reductase, HDHPR, Quinoid dihydropteridine reductase                                                                                                                                                 | Entry not found!                                                                                                                                                                                                      |  | 0 |
| P09429 | 35 | 18 | 8  | 7  | 11 | 16  |     | 28 | 22 | 17  | High mobility group protein B1, High mobility group protein 1, HMG-1                                                                                                                                                  | Nucleus.                                                                                                                                                                                                              |  | 0 |
| P09493 |    |    |    |    | 13 |     | 10  |    |    |     | Tropomyosin alpha-1 chain, Tropomyosin-1, Alpha-tropomyosin                                                                                                                                                           | Entry not found!                                                                                                                                                                                                      |  | 0 |
| P09525 |    | 5  |    |    |    |     | 4   |    |    |     | Annexin A4, Annexin-4, Annexin IV, Lipocortin IV, Endonexin I, Chromobindin-4, Protein II, P32.5, Placental anticoagulant protein II, PAP-II, PP4-X, 35-beta calcimedin, Carbohydrate-binding protein P33/P41, P33/41 | Entry not found!                                                                                                                                                                                                      |  | 0 |
| P09543 |    |    | 9  |    |    |     |     |    |    |     | 2',3'-cyclic-nucleotide 3'-phosphodiesterase, CNPase, CNP                                                                                                                                                             | Membrane. Melanosome. Note=Firmly bound to membrane structures of brain white matter. Identified by mass spectrometry in melanosome fractions from stage I to stage IV.                                               |  | 0 |
| P09651 |    |    | 8  |    | 12 |     |     |    |    |     | Heterogeneous nuclear ribonucleoprotein A1, Helix-destabilizing protein, Single-strand RNA-binding protein, hnRNP core protein A1                                                                                     | Nucleus. Cytoplasm. Note=Shuttles continuously between the nucleus and the cytoplasm along with mRNA. Component of ribonucleosomes.                                                                                   |  | 0 |
| P09936 |    |    |    |    |    |     | 21  |    |    |     | Ubiquitin carboxyl-terminal hydrolase isozyme L1, UCH-L1, Ubiquitin thioesterase L1, Neuron cytoplasmic protein 9.5, PGP 9.5, PGP9.5                                                                                  | Cytoplasm.                                                                                                                                                                                                            |  | 0 |
| P09972 |    |    |    | 17 |    |     |     |    |    |     | Fructose-bisphosphate aldolase C, Brain-type aldolase                                                                                                                                                                 | Entry not found!                                                                                                                                                                                                      |  | 0 |
| P0C0S5 |    |    |    |    |    | 116 |     |    | 37 |     | Histone H2A.Z, H2A/z                                                                                                                                                                                                  | Nucleus.                                                                                                                                                                                                              |  | 0 |
| P10412 |    | 42 |    |    |    |     |     | 42 |    |     | Histone H1.4, Histone H1b                                                                                                                                                                                             | Nucleus.                                                                                                                                                                                                              |  | 0 |
| P10809 | 6  | 10 |    | 72 | 26 | 22  |     |    | 28 | 308 | 60 kDa heat shock protein, mitochondrial precursor, Heat shock protein 60, HSP-60, Hsp60, 60 kDa chaperonin, Chaperonin 60, CPN60, Mitochondrial matrix protein P1, P60 lymphocyte protein, HuCHA60                   | Mitochondrion matrix.                                                                                                                                                                                                 |  | 0 |
| P11142 |    | 8  | 23 | 83 | 65 | 30  | 57  |    | 40 | 93  | Heat shock cognate 71 kDa protein, Heat shock 70 kDa protein 8                                                                                                                                                        | Cytoplasm. Melanosome. Note=Translocates rapidly from the cytoplasm to the nuclei, and especially to the nucleoli, upon heat shock. Identified by mass spectrometry in melanosome fractions from stage I to stage IV. |  | 0 |
| P11177 |    |    | 3  |    | 3  |     |     |    |    |     | Pyruvate dehydrogenase E1 component subunit beta, mitochondrial precursor, PDHE1-B                                                                                                                                    | Mitochondrion matrix.                                                                                                                                                                                                 |  | 0 |
| P11216 |    |    | 50 |    |    |     |     |    |    |     | Glycogen phosphorylase, brain form                                                                                                                                                                                    | Entry not found!                                                                                                                                                                                                      |  | 0 |
| P11217 |    |    | 2  |    |    |     |     |    |    |     | Glycogen phosphorylase, muscle form, Myophosphorylase                                                                                                                                                                 | Entry not found!                                                                                                                                                                                                      |  | 0 |

Total Protein Identified

|        |   |   |    |    |    |   |    |    |    |                                                                                                                                                                                                                                                                            |                                                                                                                                                                                                                                                                                                     |                                                                                                                                                                                                                                                             |   |   |
|--------|---|---|----|----|----|---|----|----|----|----------------------------------------------------------------------------------------------------------------------------------------------------------------------------------------------------------------------------------------------------------------------------|-----------------------------------------------------------------------------------------------------------------------------------------------------------------------------------------------------------------------------------------------------------------------------------------------------|-------------------------------------------------------------------------------------------------------------------------------------------------------------------------------------------------------------------------------------------------------------|---|---|
| P11532 |   |   |    |    |    |   |    | 2  |    | Dystrophin                                                                                                                                                                                                                                                                 | Cell membrane, sarcolemma; Peripheral membrane protein; Cytoplasmic side. Cytoplasm, cytoskeleton.                                                                                                                                                                                                  |                                                                                                                                                                                                                                                             | 0 |   |
| P12004 |   |   |    | 3  |    |   |    |    |    | Proliferating cell nuclear antigen, PCNA, Cyclin                                                                                                                                                                                                                           | Nucleus.                                                                                                                                                                                                                                                                                            |                                                                                                                                                                                                                                                             | 0 |   |
| P12268 |   |   | 14 |    |    |   |    |    |    | Inosine-5'-monophosphate dehydrogenase 2, IMP dehydrogenase 2, IMPDH-II, IMPD 2                                                                                                                                                                                            | Entry not found!                                                                                                                                                                                                                                                                                    |                                                                                                                                                                                                                                                             | 0 |   |
| P12277 |   |   |    | 17 |    |   |    | 19 | 35 | Creatine kinase B-type, Creatine kinase B chain, B-CK                                                                                                                                                                                                                      | Cytoplasm.                                                                                                                                                                                                                                                                                          |                                                                                                                                                                                                                                                             | 0 |   |
| P12429 |   |   |    | 32 |    | 9 | 6  | 25 | 10 | Annexin A3, Annexin-3, Annexin III, Lipocortin III, Placental anticoagulant protein III, PAP-III, 35-alpha calcimedlin, Inositol 1,2-cyclic phosphate 2-phosphohydrolase                                                                                                   | Entry not found!                                                                                                                                                                                                                                                                                    |                                                                                                                                                                                                                                                             | 0 |   |
| P12814 |   |   | 4  | 7  | 3  |   | 7  |    | 10 | 19                                                                                                                                                                                                                                                                         | Alpha-actinin-1, Alpha-actinin cytoskeletal isoform, Non-muscle alpha-actinin-1, F-actin cross-linking protein                                                                                                                                                                                      | Cytoplasm, cytoskeleton. Cytoplasm, myofibril, sarcomere, Z-disk. Note=Colocalizes with MYOZ2 and PPP3CA at the Z-line of heart and skeletal muscle.                                                                                                        |   | 0 |
| P12955 |   |   | 2  |    |    |   |    |    |    | Xaa-Pro dipeptidase, X-Pro dipeptidase, Proline dipeptidase, Prolidase, Imidodipeptidase, Peptidase D                                                                                                                                                                      | Entry not found!                                                                                                                                                                                                                                                                                    |                                                                                                                                                                                                                                                             | 0 |   |
| P12956 |   |   | 3  |    |    |   |    |    |    | ATP-dependent DNA helicase 2 subunit 1, ATP-dependent DNA helicase II 70 kDa subunit, Lupus Ku autoantigen protein p70, Ku70, 70 kDa subunit of Ku antigen, Thyroid-lupus autoantigen, TLAA, CTC box-binding factor 75 kDa subunit, CTCBF, CTC75, DNA-repair protein XRCC6 | Nucleus.                                                                                                                                                                                                                                                                                            |                                                                                                                                                                                                                                                             | 0 |   |
| P13010 |   |   | 9  |    | 4  |   |    |    |    | 17                                                                                                                                                                                                                                                                         | ATP-dependent DNA helicase 2 subunit 2, ATP-dependent DNA helicase II 80 kDa subunit, Lupus Ku autoantigen protein p86, Ku86, Ku80, 86 kDa subunit of Ku antigen, Thyroid-lupus autoantigen, TLAA, CTC box-binding factor 85 kDa subunit, CTCBF, CTC85, Nuclear factor IV, DNA-repair protein XRCC5 | Nucleus.                                                                                                                                                                                                                                                    |   | 0 |
| P13639 |   |   | 53 |    | 18 |   |    |    |    | 8                                                                                                                                                                                                                                                                          | Elongation factor 2, EF-2                                                                                                                                                                                                                                                                           | Cytoplasm.                                                                                                                                                                                                                                                  |   | 0 |
| P13645 | 3 | 3 | 9  |    | 6  | 7 | 13 | 2  |    |                                                                                                                                                                                                                                                                            | Keratin, type I cytoskeletal 10, Cytokeratin-10, CK-10, Keratin-10, K10                                                                                                                                                                                                                             | Entry not found!                                                                                                                                                                                                                                            |   | 0 |
| P13693 |   |   |    |    | 2  |   |    |    |    |                                                                                                                                                                                                                                                                            | Translationally-controlled tumor protein, TCTP, p23, Histamine-releasing factor, HRF, Fortilin                                                                                                                                                                                                      | Cytoplasm.                                                                                                                                                                                                                                                  |   | 0 |
| P13797 |   |   |    |    | 41 |   |    |    |    |                                                                                                                                                                                                                                                                            | Plastin-3, T-plastin                                                                                                                                                                                                                                                                                | Cytoplasm.                                                                                                                                                                                                                                                  |   | 0 |
| P13804 |   |   |    | 6  |    |   |    |    |    | 11                                                                                                                                                                                                                                                                         | Electron transfer flavoprotein subunit alpha, mitochondrial precursor, Alpha-ETF                                                                                                                                                                                                                    | Mitochondrion matrix.                                                                                                                                                                                                                                       |   | 0 |
| P14174 |   |   | 4  | 7  |    |   |    |    | 7  |                                                                                                                                                                                                                                                                            | Macrophage migration inhibitory factor, MIF, Phenylpyruvate tautomerase, Glycosylation-inhibiting factor, GIF                                                                                                                                                                                       | Entry not found!                                                                                                                                                                                                                                            |   | 0 |
| P14678 | 9 |   | 13 |    |    |   |    | 3  | 5  |                                                                                                                                                                                                                                                                            | Small nuclear ribonucleoprotein-associated proteins B and B', snRNP-B, Sm protein B/B', Sm-B/Sm-B', SmB/SmB'                                                                                                                                                                                        | Nucleus.                                                                                                                                                                                                                                                    |   | 0 |
| P14927 |   |   | 2  |    | 6  |   |    |    |    |                                                                                                                                                                                                                                                                            | Cytochrome b-c1 complex subunit 7, Ubiquinol-cytochrome c reductase complex 14 kDa protein, Complex III subunit 7, Complex III subunit VII, QP-C                                                                                                                                                    | Mitochondrion inner membrane.                                                                                                                                                                                                                               |   | 0 |
| P15311 | 2 | 3 |    |    | 2  |   |    |    | 22 | 78                                                                                                                                                                                                                                                                         | Ezrin, p81, Cytovillin, Villin-2                                                                                                                                                                                                                                                                    | Membrane. Note=Localization to the apical membrane of parietal cells depends on the interaction with MPP5. Localizes to cell extensions and peripheral processes of astrocytes (By similarity). Microvillar peripheral membrane protein (cytoplasmic side). |   | 0 |



## Total Protein Identified

|        |    |    |    |    |    |    |    |    |    |    |                                                                                                                                                                                                                     |                                                                                                                                                 |  |   |
|--------|----|----|----|----|----|----|----|----|----|----|---------------------------------------------------------------------------------------------------------------------------------------------------------------------------------------------------------------------|-------------------------------------------------------------------------------------------------------------------------------------------------|--|---|
| P15531 | 5  | 2  | 28 |    | 11 | 11 | 38 | 17 | 9  | 7  | Nucleoside diphosphate kinase A, NDK A, NDP kinase A, Tumor metastatic process-associated protein, Metastasis inhibition factor nm23, nm23-H1, Granzyme A-activated DNase, GAAD                                     | Cytoplasm. Nucleus.                                                                                                                             |  | 0 |
| P15559 | 5  |    |    |    |    |    |    |    |    |    | NAD(P)H dehydrogenase [quinone] 1, Quinone reductase 1, NAD(P)H:quinone oxidoreductase 1, QR1, DT-diaphorase, DTD, Azoreductase, Phylloquinone reductase, Menadiione reductase                                      | Cytoplasm.                                                                                                                                      |  | 0 |
| P15880 | 15 | 7  | 23 |    |    | 9  |    | 19 |    |    | 40S ribosomal protein S2, S4, LLRep3 protein                                                                                                                                                                        | Entry not found!                                                                                                                                |  | 0 |
| P16152 |    |    |    | 8  |    |    |    |    |    |    | Carbonyl reductase [NADPH] 1, NADPH-dependent carbonyl reductase 1, Prostaglandin-E(2) 9-reductase, Prostaglandin 9-ketoreductase, 15-hydroxyprostaglandin dehydrogenase [NADP+]                                    | Cytoplasm.                                                                                                                                      |  | 0 |
| P16401 | 21 | 26 |    |    |    | 13 |    | 10 |    |    | Histone H1.5, Histone H1a                                                                                                                                                                                           | Nucleus.                                                                                                                                        |  | 0 |
| P16402 | 24 |    |    |    | 9  | 27 |    |    |    | 4  | Histone H1.3, Histone H1c                                                                                                                                                                                           | Nucleus.                                                                                                                                        |  | 0 |
| P16403 |    |    | 24 |    |    |    |    |    |    |    | Histone H1.2, Histone H1d                                                                                                                                                                                           | Nucleus.                                                                                                                                        |  | 0 |
| P17174 | 11 |    | 10 |    |    | 23 |    |    | 39 | 88 | Aspartate aminotransferase, cytoplasmic, Transaminase A, Glutamate oxaloacetate transaminase 1                                                                                                                      | Cytoplasm.                                                                                                                                      |  | 0 |
| P17931 |    |    |    | 10 |    |    |    |    |    |    | Galectin-3, Galactose-specific lectin 3, Mac-2 antigen, IgE-binding protein, 35 kDa lectin, Carbohydrate-binding protein 35, CBP 35, Laminin-binding protein, Lectin L-29, L-31, Galactoside-binding protein, GALBP | Nucleus. Note=Cytoplasmic in adenomas and carcinomas. May be secreted by a non-classical secretory pathway and associate with the cell surface. |  | 0 |
| P17987 |    |    |    |    |    |    |    |    |    | 6  | T-complex protein 1 subunit alpha, TCP-1-alpha, CCT-alpha                                                                                                                                                           | Cytoplasm.                                                                                                                                      |  | 0 |
| P18124 |    |    | 22 | 7  |    |    |    |    |    |    | 60S ribosomal protein L7                                                                                                                                                                                            | Entry not found!                                                                                                                                |  | 0 |
| P18206 |    |    |    |    |    |    | 65 | 7  |    | 12 | Vinculin, Metavinculin                                                                                                                                                                                              | Cytoplasm, cytoskeleton. Cell junction, adherens junction; Cytoplasmic side. Note=Cytoplasmic face of adhesion plaques.                         |  | 0 |
| P18583 |    | 8  |    |    | 4  |    |    |    | 7  | 38 | SON protein, SON3, Negative regulatory element-binding protein, NRE-binding protein, DBP-5, Bax antagonist selected in saccharomyces 1, BASS1                                                                       | Nucleus speckle.                                                                                                                                |  | 0 |
| P18621 | 22 | 14 |    |    |    |    |    |    |    |    | 60S ribosomal protein L17, L23, PD-1                                                                                                                                                                                | Entry not found!                                                                                                                                |  | 0 |
| P18669 |    | 3  |    | 48 | 8  |    | 12 |    |    |    | Phosphoglycerate mutase 1, Phosphoglycerate mutase isozyme B, PGAM-B, BPG-dependent PGAM 1                                                                                                                          | Entry not found!                                                                                                                                |  | 0 |
| P18859 | 3  |    |    |    | 13 |    |    |    |    |    | ATP synthase-coupling factor 6, mitochondrial precursor, ATPase subunit F6                                                                                                                                          | Mitochondrion. Mitochondrion inner membrane.                                                                                                    |  | 0 |
| P19105 |    |    |    |    | 15 |    | 8  |    | 10 | 9  | Myosin regulatory light chain 2, nonsarcomeric, Myosin RLC                                                                                                                                                          | Entry not found!                                                                                                                                |  | 0 |
| P19338 | 13 | 13 | 35 | 3  | 7  | 12 | 5  | 12 |    | 11 | Nucleolin, Protein C23                                                                                                                                                                                              | Nucleus, nucleolus.                                                                                                                             |  | 0 |
| P20290 | 2  |    |    |    |    | 2  |    |    |    |    | Transcription factor BTF3, RNA polymerase B transcription factor 3                                                                                                                                                  | Nucleus.                                                                                                                                        |  | 0 |
| P20591 |    |    |    |    | 6  |    |    |    |    |    | Interferon-induced GTP-binding protein Mx1, Myxovirus resistance protein 1, Interferon-regulated resistance GTP-binding protein MxA, Interferon-induced protein p78, IFI-78K                                        | Cytoplasm.                                                                                                                                      |  | 0 |
| P20618 | 5  | 3  |    |    | 45 | 29 | 25 | 13 | 82 | 23 | Proteasome subunit beta type-1 precursor, Proteasome component C5, Macropain subunit C5, Multicatalytic endopeptidase complex subunit C5, Proteasome gamma chain                                                    | Cytoplasm. Nucleus.                                                                                                                             |  | 0 |
| P20674 | 3  |    |    |    | 4  |    |    |    |    |    | Cytochrome c oxidase subunit 5A, mitochondrial precursor, Cytochrome c oxidase polypeptide Va                                                                                                                       | Mitochondrion inner membrane.                                                                                                                   |  | 0 |
| P20700 |    |    |    |    |    |    |    |    | 8  | 14 | Lamin-B1                                                                                                                                                                                                            | Nucleus inner membrane; Lipid anchor; Nucleoplasmic side.                                                                                       |  | 0 |
| P20810 |    |    |    |    | 2  |    |    |    |    |    | Calpastatin, Calpain inhibitor, Sperm BS-17 component                                                                                                                                                               | Entry not found!                                                                                                                                |  | 0 |
| P20908 |    |    |    |    | 7  | 59 |    |    |    | 14 | Collagen alpha-1(V) chain precursor                                                                                                                                                                                 | Secreted, extracellular space, extracellular matrix (By similarity).                                                                            |  | 0 |

## Total Protein Identified

|        |    |    |    |    |    |    |    |    |    |                                                                         |                                                                                                                                                                                                                                          |                                                                                                                                                               |   |   |
|--------|----|----|----|----|----|----|----|----|----|-------------------------------------------------------------------------|------------------------------------------------------------------------------------------------------------------------------------------------------------------------------------------------------------------------------------------|---------------------------------------------------------------------------------------------------------------------------------------------------------------|---|---|
| P21291 |    |    | 5  |    |    |    |    |    |    | Cysteine and glycine-rich protein 1, Cysteine-rich protein 1, CRP1, CRP | Nucleus.                                                                                                                                                                                                                                 |                                                                                                                                                               | 0 |   |
| P21333 |    |    |    |    | 39 | 4  | 91 | 18 | 16 | 24                                                                      | Filamin-A, Alpha-filamin, Filamin-1, Endothelial actin-binding protein, Actin-binding protein 280, ABP-280, Non-muscle filamin                                                                                                           | Cytoplasm, cell cortex.                                                                                                                                       |   | 0 |
| P21796 |    |    |    |    |    | 18 | 2  | 30 | 8  | 38                                                                      | Voltage-dependent anion-selective channel protein 1, VDACC1, hVDAC1, Outer mitochondrial membrane protein porin 1, Plasmalemmal porin, Porin 31HL, Porin 31HM                                                                            | Mitochondrion outer membrane. Cell membrane.                                                                                                                  |   | 0 |
| P22061 |    |    | 8  | 8  |    |    | 3  |    |    |                                                                         | Protein-L-isoaspartate(D-aspartate) O-methyltransferase, Protein-beta-aspartate methyltransferase, PIMT, Protein L-isoaspartyl/D-aspartyl methyltransferase, L-isoaspartyl protein carboxyl methyltransferase                            | Cytoplasm.                                                                                                                                                    |   | 0 |
| P22234 | 7  | 2  | 13 | 46 |    | 8  | 19 | 31 |    |                                                                         | Multifunctional protein ADE2                                                                                                                                                                                                             | Entry not found!                                                                                                                                              |   | 0 |
| P22307 | 19 | 5  |    |    | 16 | 11 | 3  | 5  |    | 4                                                                       | Non-specific lipid-transfer protein, Propanoyl-CoA C-acyltransferase, NSL-TP, Sterol carrier protein 2, SCP-2, Sterol carrier protein X, SCP-X, SCP-chi, SCPX                                                                            | Cytoplasm. Mitochondrion. Note=Cytoplasmic in the liver and also associated with mitochondria especially in steroidogenic tissues., Isoform SCPX: Peroxisome. |   | 0 |
| P22314 |    |    | 6  | 8  | 8  |    |    |    |    | 5                                                                       | Ubiquitin-like modifier-activating enzyme 1, Ubiquitin-activating enzyme E1, Protein A1S9                                                                                                                                                | Entry not found!                                                                                                                                              |   | 0 |
| P22626 |    | 3  | 26 |    | 20 |    |    |    |    | 4                                                                       | Heterogeneous nuclear ribonucleoproteins A2/B1, hnRNP A2 / hnRNP B1                                                                                                                                                                      | Nucleus. Note=Component of ribonucleosomes.                                                                                                                   |   | 0 |
| P23246 |    |    |    | 6  | 3  |    |    |    |    |                                                                         | Splicing factor, proline- and glutamine-rich, Polypyrimidine tract-binding protein-associated-splicing factor, PTB-associated-splicing factor, PSF, DNA-binding p52/p100 complex, 100 kDa subunit, 100 kDa DNA-pairing protein, hPOMP100 | Nucleus matrix. Note=Predominantly in nuclear matrix.                                                                                                         |   | 0 |
| P23284 | 5  | 8  | 47 | 68 | 11 | 11 | 7  |    | 14 | 33                                                                      | Peptidyl-prolyl cis-trans isomerase B precursor, PPIase, Rotamase, Cyclophilin B, S-cyclophilin, SCYLP, CYP-S1                                                                                                                           | Endoplasmic reticulum lumen. Melanosome. Note=Identified by mass spectrometry in melanosome fractions from stage I to stage IV.                               |   | 0 |
| P23381 |    |    |    | 55 |    |    |    |    |    |                                                                         | Tryptophanyl-tRNA synthetase, cytoplasmic, Tryptophan--tRNA ligase, TrpRS, Interferon-induced protein 53, IFP53, hWRS                                                                                                                    | Cytoplasm.                                                                                                                                                    |   | 0 |
| P23396 | 14 | 3  | 9  | 15 | 2  |    | 26 | 6  |    | 8                                                                       | 40S ribosomal protein S3                                                                                                                                                                                                                 | Entry not found!                                                                                                                                              |   | 0 |
| P23511 | 2  |    |    |    |    |    |    |    |    |                                                                         | Nuclear transcription factor Y subunit alpha, Nuclear transcription factor Y subunit A, NF-YA, CAAT-box DNA-binding protein subunit A                                                                                                    | Nucleus.                                                                                                                                                      |   | 0 |
| P23528 | 4  | 19 | 22 | 16 | 24 | 26 | 54 |    | 32 | 43                                                                      | Cofilin-1, Cofilin, non-muscle isoform, 18 kDa phosphoprotein, p18                                                                                                                                                                       | Nucleus matrix. Cytoplasm, cytoskeleton. Note=Almost completely in nucleus in cells exposed to heat shock or 10% dimethyl sulfoxide.                          |   | 0 |
| P24539 |    |    |    |    |    |    |    |    |    | 10                                                                      | ATP synthase subunit b, mitochondrial precursor                                                                                                                                                                                          | Mitochondrion. Mitochondrion inner membrane.                                                                                                                  |   | 0 |
| P24752 |    |    |    |    |    |    |    |    |    | 8                                                                       | Acetyl-CoA acetyltransferase, mitochondrial precursor, Acetoacetyl-CoA thiolase, T2                                                                                                                                                      | Mitochondrion.                                                                                                                                                |   | 0 |
| P25325 |    |    |    | 5  |    |    |    |    |    |                                                                         | 3-mercaptopyruvate sulfurtransferase, MST                                                                                                                                                                                                | Cytoplasm.                                                                                                                                                    |   | 0 |
| P25705 |    |    | 7  |    | 2  |    |    |    |    | 12                                                                      | ATP synthase subunit alpha, mitochondrial precursor                                                                                                                                                                                      | Mitochondrion inner membrane. Note=Peripheral membrane protein.                                                                                               |   | 0 |
| P25788 |    |    |    | 21 | 4  |    |    |    | 15 | 12                                                                      | Proteasome subunit alpha type-3, Proteasome component C8, Macropain subunit C8, Multicatalytic endopeptidase complex subunit C8                                                                                                          | Cytoplasm. Nucleus.                                                                                                                                           |   | 0 |
| P25815 | 4  | 2  |    |    |    |    |    |    |    |                                                                         | Protein S100-P, S100 calcium-binding protein P                                                                                                                                                                                           | Nucleus. Cytoplasm. Note=Colocalizes with S100PBP in the nucleus.                                                                                             |   | 0 |

Total Protein Identified

|        |    |   |    |    |    |    |    |    |    |     |                                                                                                                                      |                                                                                                                                                                                                                                                                                                                                                                                                                                                                |  |   |
|--------|----|---|----|----|----|----|----|----|----|-----|--------------------------------------------------------------------------------------------------------------------------------------|----------------------------------------------------------------------------------------------------------------------------------------------------------------------------------------------------------------------------------------------------------------------------------------------------------------------------------------------------------------------------------------------------------------------------------------------------------------|--|---|
| P26038 |    |   | 14 | 35 | 40 | 40 | 26 | 21 | 86 | 182 | Moesin, Membrane-organizing extension spike protein                                                                                  | Cytoplasm (By similarity). Note=Phosphorylated form is enriched in microvilli-like structures at apical membrane (By similarity).                                                                                                                                                                                                                                                                                                                              |  | 0 |
| P26368 |    |   |    |    |    |    |    |    |    | 11  | Splicing factor U2AF 65 kDa subunit, U2 auxiliary factor 65 kDa subunit, hU2AF65, hU2AF(65), U2 snRNP auxiliary factor large subunit | Nucleus.                                                                                                                                                                                                                                                                                                                                                                                                                                                       |  | 0 |
| P26373 | 8  | 7 | 11 | 7  |    |    |    | 12 |    |     | 60S ribosomal protein L13, Breast basic conserved protein 1                                                                          | Entry not found!                                                                                                                                                                                                                                                                                                                                                                                                                                               |  | 0 |
| P26447 |    |   |    |    |    |    |    |    | 7  | 5   | Protein S100-A4, S100 calcium-binding protein A4, Metastasin, Protein Mts1, Placental calcium-binding protein, Calvasculin           | Entry not found!                                                                                                                                                                                                                                                                                                                                                                                                                                               |  | 0 |
| P26583 | 13 | 9 |    |    |    |    |    |    |    | 2   | High mobility group protein B2, High mobility group protein 2, HMG-2                                                                 | Nucleus.                                                                                                                                                                                                                                                                                                                                                                                                                                                       |  | 0 |
| P26599 | 4  |   | 8  |    | 3  |    |    |    | 6  | 54  | Polypyrimidine tract-binding protein 1, PTB, Heterogeneous nuclear ribonucleoprotein I, hnRNP I, 57 kDa RNA-binding protein PPTB-1   | Nucleus.                                                                                                                                                                                                                                                                                                                                                                                                                                                       |  | 0 |
| P26641 |    |   | 11 | 55 | 5  |    |    |    | 5  | 24  | Elongation factor 1-gamma, EF-1-gamma, eEF-1B gamma                                                                                  | Entry not found!                                                                                                                                                                                                                                                                                                                                                                                                                                               |  | 0 |
| P26885 | 5  | 7 |    |    | 7  |    | 14 | 6  |    |     | FK506-binding protein 2 precursor, Peptidyl-prolyl cis-trans isomerase, PPIase, Rotamase, 13 kDa FKBP, FKBP-13                       | Endoplasmic reticulum membrane; Peripheral membrane protein (Probable).                                                                                                                                                                                                                                                                                                                                                                                        |  | 0 |
| P27105 |    |   | 27 | 15 |    |    |    |    |    |     | Erythrocyte band 7 integral membrane protein, Stomatin, Protein 7.2b                                                                 | Cell membrane; Single-pass membrane protein; Cytoplasmic side. Cell membrane; Lipid-anchor; Cytoplasmic side. Melanosome. Note=Exposed on the cytoplasmic surface of the membrane. Associated with lipid rafts. Concentrates preferentially in plasma membrane protrusions and in a juxta-nuclear region which may represent Golgi-derived vesicles. Colocalizes with actin. Identified by mass spectrometry in melanosome fractions from stage I to stage IV. |  | 1 |
| P27348 |    | 4 |    | 8  | 14 | 4  | 25 |    | 14 | 39  | 14-3-3 protein theta, 14-3-3 protein tau, 14-3-3 protein T-cell, Protein HS1                                                         | Cytoplasm. Note=In neurons, axonally transported to the nerve terminals.                                                                                                                                                                                                                                                                                                                                                                                       |  | 0 |
| P27635 |    |   | 4  |    |    |    |    |    |    |     | 60S ribosomal protein L10, Protein QM, Tumor suppressor QM, Laminin receptor homolog                                                 | Entry not found!                                                                                                                                                                                                                                                                                                                                                                                                                                               |  | 0 |
| P27658 |    |   |    |    |    |    |    | 4  |    |     | Collagen alpha-1(VIII) chain precursor, Endothelial collagen                                                                         | Secreted, extracellular space, extracellular matrix, basement membrane.                                                                                                                                                                                                                                                                                                                                                                                        |  | 0 |
| P27695 | 37 | 9 | 9  | 11 |    | 9  | 24 | 15 |    | 14  | DNA-(apurinic or apyrimidinic site) lyase, AP endonuclease 1, APEX nuclease, APEN, Protein REF-1                                     | Nucleus.                                                                                                                                                                                                                                                                                                                                                                                                                                                       |  | 0 |
| P27708 |    |   | 5  |    |    |    |    |    |    |     | CAD protein                                                                                                                          | Cytoplasm.                                                                                                                                                                                                                                                                                                                                                                                                                                                     |  | 0 |
| P27816 |    |   | 3  |    |    |    | 3  | 5  | 4  | 4   | Microtubule-associated protein 4, MAP 4                                                                                              | Entry not found!                                                                                                                                                                                                                                                                                                                                                                                                                                               |  | 0 |
| P27824 |    |   | 30 | 9  | 3  | 13 |    | 6  |    | 104 | Calnexin precursor, Major histocompatibility complex class I antigen-binding protein p88, p90, IP90                                  | Endoplasmic reticulum membrane; Single-pass type I membrane protein. Melanosome. Note=Identified by mass spectrometry in melanosome fractions from stage I to stage IV.                                                                                                                                                                                                                                                                                        |  | 1 |

## Total Protein Identified

|        |    |     |     |     |     |    |    |    |    |                                                                                                                                           |                                                                                                                                                                                                                                                                                                                          |                                                                                                                                                 |   |   |
|--------|----|-----|-----|-----|-----|----|----|----|----|-------------------------------------------------------------------------------------------------------------------------------------------|--------------------------------------------------------------------------------------------------------------------------------------------------------------------------------------------------------------------------------------------------------------------------------------------------------------------------|-------------------------------------------------------------------------------------------------------------------------------------------------|---|---|
| P28066 |    |     |     | 8   | 2   |    |    |    |    | Proteasome subunit alpha type-5, Proteasome zeta chain, Macropain zeta chain, Multicatalytic endopeptidase complex zeta chain             | Cytoplasm. Nucleus.                                                                                                                                                                                                                                                                                                      |                                                                                                                                                 | 0 |   |
| P29373 |    |     |     |     | 3   |    |    |    |    | Cellular retinoic acid-binding protein 2, Cellular retinoic acid-binding protein II, CRABP-II, Retinoic acid-binding protein II, cellular | Cytoplasm. Nucleus.<br>Note=Upon ligand binding, a conformation change exposes a nuclear localization motif and the protein is transported into the nucleus.                                                                                                                                                             |                                                                                                                                                 | 0 |   |
| P29475 |    |     | 2   |     |     |    |    |    |    | Nitric oxide synthase, brain, bNOS, NOS type I, Neuronal NOS, N-NOS, nNOS, Constitutive NOS, NC-NOS                                       | Cell membrane, sarcolemma; Peripheral membrane protein. Cell projection, dendritic spine (By similarity). Note=In skeletal muscle, it is localized beneath the sarcolemma of fast-twitch muscle fiber by associating with the dystrophin glycoprotein complex. In neurons, enriched in dendritic spines (By similarity). |                                                                                                                                                 | 0 |   |
| P29966 |    |     |     |     | 6   |    | 27 | 14 | 4  | 28                                                                                                                                        | Myristoylated alanine-rich C-kinase substrate, MARCKS, Protein kinase C substrate, 80 kDa protein, light chain, PKCSL, 80K-L protein                                                                                                                                                                                     | Cytoplasm, cytoskeleton (Probable). Membrane; Lipid-anchor (By similarity).                                                                     |   | 0 |
| P30043 |    |     |     | 3   |     |    |    |    |    |                                                                                                                                           | Flavin reductase, FR, NADPH-dependent diaphorase, NADPH-flavin reductase, FLR, Biliverdin reductase B, BVR-B, Biliverdin-IX beta-reductase, Green heme-binding protein, GHBP                                                                                                                                             | Cytoplasm (Potential).                                                                                                                          |   | 0 |
| P30044 | 4  |     |     | 23  | 39  | 23 | 14 |    | 4  | 12                                                                                                                                        | Peroxisome antioxidant enzyme, PLP, Thioredoxin reductase, Thioredoxin peroxidase PMP20, Antioxidant enzyme B166, AOEB166, TPx type VI, Liver tissue 2D-page spot 71B, Alu corepressor 1                                                                                                                                 | Mitochondrion. Cytoplasm. Peroxisome.                                                                                                           |   | 0 |
| P30046 |    |     |     | 13  |     |    |    |    |    |                                                                                                                                           | D-dopachrome decarboxylase, D-dopachrome tautomerase, Phenylpyruvate tautomerase II                                                                                                                                                                                                                                      | Cytoplasm (By similarity).                                                                                                                      |   | 0 |
| P30048 | 11 | 4   |     |     | 13  |    | 14 |    |    | 9                                                                                                                                         | Thioredoxin-dependent peroxide reductase, mitochondrial precursor, Peroxisome antioxidant enzyme, PRX III, Antioxidant protein 1, AOP-1, Protein MER5 homolog, HBC189                                                                                                                                                    | Mitochondrion.                                                                                                                                  |   | 0 |
| P30049 |    |     |     |     |     |    |    | 3  |    |                                                                                                                                           | ATP synthase subunit delta, mitochondrial precursor                                                                                                                                                                                                                                                                      | Mitochondrion. Mitochondrion inner membrane.                                                                                                    |   | 0 |
| P30050 | 25 | 12  | 64  | 24  | 10  | 16 |    | 31 |    | 12                                                                                                                                        | 60S ribosomal protein L12                                                                                                                                                                                                                                                                                                | Entry not found!                                                                                                                                |   | 0 |
| P30101 | 48 | 106 | 100 | 183 | 101 |    | 23 | 15 | 56 | 166                                                                                                                                       | Protein disulfide-isomerase A3 precursor, Disulfide isomerase ER-60, ERp60, 58 kDa microsomal protein, p58, ERp57, 58 kDa glucose-regulated protein                                                                                                                                                                      | Endoplasmic reticulum lumen (By similarity). Melanosome. Note=Identified by mass spectrometry in melanosome fractions from stage I to stage IV. |   | 0 |
| P30740 | 6  | 7   |     |     |     | 4  |    |    |    |                                                                                                                                           | Leukocyte elastase inhibitor, LEI, Serpin B1, Monocyte/neutrophil elastase inhibitor, M/NEI, EI                                                                                                                                                                                                                          | Cytoplasm (By similarity).                                                                                                                      |   | 0 |
| P31040 | 2  |     |     |     |     |    |    |    |    |                                                                                                                                           | Succinate dehydrogenase [ubiquinone] flavoprotein subunit, mitochondrial precursor, Fp, Flavoprotein subunit of complex II                                                                                                                                                                                               | Mitochondrion inner membrane.                                                                                                                   |   | 0 |
| P31150 |    |     |     | 2   |     |    |    |    |    |                                                                                                                                           | Rab GDP dissociation inhibitor alpha, Rab GDI alpha, Guanosine diphosphate dissociation inhibitor 1, GDI-1, Oligophrenin-2, Protein XAP-4                                                                                                                                                                                | Cytoplasm (By similarity).                                                                                                                      |   | 0 |
| P31943 |    |     |     |     | 7   |    |    |    |    |                                                                                                                                           | Heterogeneous nuclear ribonucleoprotein H, hnRNP H                                                                                                                                                                                                                                                                       | Nucleus, nucleoplasm.                                                                                                                           |   | 0 |

## Total Protein Identified

|        |    |   |    |    |    |    |    |    |    |                                                                                                                                              |                                                                                                                                                                                                             |                                                                                                                                                                                                                                                                  |                                                                                                                                                                                                    |   |
|--------|----|---|----|----|----|----|----|----|----|----------------------------------------------------------------------------------------------------------------------------------------------|-------------------------------------------------------------------------------------------------------------------------------------------------------------------------------------------------------------|------------------------------------------------------------------------------------------------------------------------------------------------------------------------------------------------------------------------------------------------------------------|----------------------------------------------------------------------------------------------------------------------------------------------------------------------------------------------------|---|
| P31946 |    |   |    | 26 | 14 |    |    |    | 29 | 14-3-3 protein beta/alpha, Protein kinase C inhibitor protein 1, KCIP-1, Protein 1054                                                        | Cytoplasm. Melanosome. Note=Identified by mass spectrometry in melanosome fractions from stage I to stage IV.                                                                                               |                                                                                                                                                                                                                                                                  | 0                                                                                                                                                                                                  |   |
| P31948 |    |   |    | 4  |    |    |    |    |    | Stress-induced-phosphoprotein 1, ST11, Hsc70/Hsp90-organizing protein, Hop, Transformation-sensitive protein IEF SSP 3521, NY-REN-11 antigen | Cytoplasm (By similarity). Nucleus (By similarity).                                                                                                                                                         |                                                                                                                                                                                                                                                                  | 0                                                                                                                                                                                                  |   |
| P31949 | 6  |   |    |    | 17 |    | 19 | 7  | 9  | 19                                                                                                                                           | Protein S100-A11, S100 calcium-binding protein A11, Protein S100C, Calgizzarin, MLN 70                                                                                                                      | Entry not found!                                                                                                                                                                                                                                                 | 0                                                                                                                                                                                                  |   |
| P32119 |    | 4 | 18 | 7  | 52 | 53 | 30 | 29 | 27 | 55                                                                                                                                           | Peroxiredoxin-2, Thioredoxin peroxidase 1, Thioredoxin-dependent peroxide reductase 1, Thiol-specific antioxidant protein, TSA, PRP, Natural killer cell-enhancing factor B, NKEF-B                         | Cytoplasm.                                                                                                                                                                                                                                                       | 0                                                                                                                                                                                                  |   |
| P33992 |    |   |    | 6  |    |    |    |    |    |                                                                                                                                              | DNA replication licensing factor MCM5, CDC46 homolog, P1-CDC46                                                                                                                                              | Nucleus.                                                                                                                                                                                                                                                         | 0                                                                                                                                                                                                  |   |
| P34931 | 2  |   |    |    |    |    |    |    |    |                                                                                                                                              | Heat shock 70 kDa protein 1L, Heat shock 70 kDa protein 1-like, Heat shock 70 kDa protein 1-Hom, HSP70-Hom                                                                                                  | Entry not found!                                                                                                                                                                                                                                                 | 0                                                                                                                                                                                                  |   |
| P34932 |    |   |    |    | 4  |    |    |    |    | 5                                                                                                                                            | Heat shock 70 kDa protein 4, Heat shock 70-related protein APG-2, HSP70RY                                                                                                                                   | Cytoplasm (Probable).                                                                                                                                                                                                                                            | 0                                                                                                                                                                                                  |   |
| P35221 |    |   |    | 4  | 13 |    |    |    | 2  |                                                                                                                                              | Catenin alpha-1, Cadherin-associated protein, Alpha E-catenin, NY-REN-13 antigen                                                                                                                            | Cytoplasm, cytoskeleton. Cell junction, adherens junction; Cytoplasmic side. Cell junction; Cytoplasmic side. Note=Found at cell-cell boundaries and probably at cell-matrix boundaries.                                                                         | 0                                                                                                                                                                                                  |   |
| P35222 |    |   |    |    | 4  |    |    |    |    |                                                                                                                                              | Catenin beta-1, Beta-catenin                                                                                                                                                                                | Cytoplasm. Nucleus. Note=Cytoplasmic when it is unstabilized (high level of phosphorylation) or bound to CDH1. Translocates to the nucleus when it is stabilized (low level of phosphorylation). Interaction with GLIS2 and MUC1 promotes nuclear translocation. | 0                                                                                                                                                                                                  |   |
| P35237 |    |   |    | 7  |    |    |    |    |    |                                                                                                                                              | Serin B6, Placental thrombin inhibitor, Cytoplasmic antiproteinase, CAP, Proteinase inhibitor 6, PI-6                                                                                                       | Cytoplasm.                                                                                                                                                                                                                                                       | 0                                                                                                                                                                                                  |   |
| P35241 |    |   |    |    | 7  |    |    | 3  | 7  | 4                                                                                                                                            | 25                                                                                                                                                                                                          | Radixin                                                                                                                                                                                                                                                          | Cell membrane. Cytoplasm, cytoskeleton. Note=Highly concentrated in the undercoat of the cell-to-cell adherens junction and the cleavage furrow in the interphase and mitotic phase, respectively. | 0 |
| P35268 | 2  |   |    | 11 | 9  |    |    |    |    |                                                                                                                                              | 60S ribosomal protein L22, Epstein-Barr virus small RNA-associated protein, EBER-associated protein, EAP, Heparin-binding protein HBp15                                                                     | Entry not found!                                                                                                                                                                                                                                                 | 0                                                                                                                                                                                                  |   |
| P35527 | 9  | 4 | 27 | 9  | 6  |    | 42 |    |    |                                                                                                                                              | Keratin, type I cytoskeletal 9, Cytokeratin-9, CK-9, Keratin-9, K9                                                                                                                                          | Entry not found!                                                                                                                                                                                                                                                 | 0                                                                                                                                                                                                  |   |
| P35579 | 10 | 2 | 8  |    | 18 | 3  | 10 | 18 |    |                                                                                                                                              | Myosin-9, Myosin heavy chain 9, Myosin heavy chain, non-muscle IIa, Non-muscle myosin heavy chain IIa, NMMHC II-a, NMMHC-IIA, Cellular myosin heavy chain, type A, Non-muscle myosin heavy chain-A, NMMHC-A | Entry not found!                                                                                                                                                                                                                                                 | 0                                                                                                                                                                                                  |   |
| P35637 |    |   |    |    |    | 3  |    |    |    |                                                                                                                                              | RNA-binding protein FUS, Oncogene FUS, Oncogene TLS, Translocated in liposarcoma protein, POMp75, 75 kDa DNA-pairing protein                                                                                | Nucleus.                                                                                                                                                                                                                                                         | 0                                                                                                                                                                                                  |   |
| P35658 |    |   |    |    |    | 10 | 3  |    |    |                                                                                                                                              | Nuclear pore complex protein Nup214, Nucleoporin Nup214, 214 kDa nucleoporin, Protein CAN                                                                                                                   | Nucleus, nuclear pore complex. Note=Cytoplasmic filaments.                                                                                                                                                                                                       | 0                                                                                                                                                                                                  |   |

## Total Protein Identified

|        |    |    |    |    |    |     |    |    |    |     |                                                                                                                                                                                                                           |                                                                                                                        |  |   |
|--------|----|----|----|----|----|-----|----|----|----|-----|---------------------------------------------------------------------------------------------------------------------------------------------------------------------------------------------------------------------------|------------------------------------------------------------------------------------------------------------------------|--|---|
| P35908 | 2  |    | 4  |    | 2  |     |    |    |    |     | Keratin, type II cytoskeletal 2 epidermal, Cytokeratin-2e, K2e, CK 2e, keratin-2                                                                                                                                          | Entry not found!                                                                                                       |  | 0 |
| P36543 |    |    |    |    | 7  |     |    |    |    |     | Vacuolar proton pump subunit E 1, V-ATPase subunit E 1, V-ATPase 31 kDa subunit, P31                                                                                                                                      | Entry not found!                                                                                                       |  | 0 |
| P36578 | 23 | 20 | 77 | 14 |    |     |    |    | 31 |     | 60S ribosomal protein L4, L1                                                                                                                                                                                              | Entry not found!                                                                                                       |  | 0 |
| P36871 |    |    |    | 3  |    |     |    |    |    |     | Phosphoglucosyltransferase-1, PGM 1, Glucose phosphomutase 1                                                                                                                                                              | Isoform 1: Cytoplasm.                                                                                                  |  | 0 |
| P36957 |    |    |    |    |    |     |    |    |    | 15  | Dihydropyridyllysine-residue succinyltransferase component of 2-oxoglutarate dehydrogenase complex, mitochondrial precursor, Dihydropyridylsuccinyltransferase component of 2-oxoglutarate dehydrogenase complex, E2, E2K | Mitochondrion.                                                                                                         |  | 0 |
| P37108 | 4  | 5  |    |    | 5  |     |    |    |    | 10  | Signal recognition particle 14 kDa protein, SRP14, 18 kDa Alu RNA-binding protein                                                                                                                                         | Cytoplasm.                                                                                                             |  | 0 |
| P38606 |    |    |    | 3  |    |     |    |    |    |     | Vacuolar ATP synthase catalytic subunit A, V-ATPase subunit A, Vacuolar proton pump subunit alpha, V-ATPase 69 kDa subunit, Vacuolar ATPase isoform VA68                                                                  | Entry not found!                                                                                                       |  | 0 |
| P38646 |    |    |    |    |    | 12  |    |    |    | 33  | Stress-70 protein, mitochondrial precursor, 75 kDa glucose-regulated protein, GRP 75, Heat shock 70 kDa protein 9, Peptide-binding protein 74, PBP74, Mortalin, MOT                                                       | Mitochondrion.                                                                                                         |  | 0 |
| P39019 | 6  |    | 8  | 6  |    | 8   |    |    | 12 |     | 40S ribosomal protein S19                                                                                                                                                                                                 | Entry not found!                                                                                                       |  | 0 |
| P39023 |    |    | 13 |    | 2  |     |    |    | 7  |     | 60S ribosomal protein L3, HIV-1 TAR RNA-binding protein B, TARBP-B                                                                                                                                                        | Cytoplasm.                                                                                                             |  | 0 |
| P39656 |    | 3  | 3  |    |    |     |    |    |    | 6   | Dolichyl-diphosphooligosaccharide--protein glycosyltransferase 48 kDa subunit precursor, Oligosaccharyl transferase 48 kDa subunit, DDOST 48 kDa subunit                                                                  | Endoplasmic reticulum membrane; Single-pass type I membrane protein.                                                   |  | 1 |
| P40121 |    |    |    |    | 3  |     | 5  |    |    |     | Macrophage-capping protein, Actin regulatory protein CAP-G                                                                                                                                                                | Cytoplasm. Nucleus. Melanosome. Note=Identified by mass spectrometry in melanosome fractions from stage I to stage IV. |  | 0 |
| P40227 |    |    |    | 30 | 8  |     | 2  |    |    | 58  | T-complex protein 1 subunit zeta, TCP-1-zeta, CCT-zeta, CCT-zeta-1, Tcp20, HTR3, Acute morphine dependence-related protein 2                                                                                              | Cytoplasm.                                                                                                             |  | 0 |
| P40261 |    |    |    |    |    |     | 6  |    |    |     | Nicotinamide N-methyltransferase                                                                                                                                                                                          | Cytoplasm.                                                                                                             |  | 0 |
| P40925 |    |    |    | 7  | 13 |     |    |    |    |     | Malate dehydrogenase, cytoplasmic, Cytosolic malate dehydrogenase                                                                                                                                                         | Cytoplasm.                                                                                                             |  | 0 |
| P40926 |    |    |    | 19 |    |     |    |    | 4  | 61  | Malate dehydrogenase, mitochondrial precursor                                                                                                                                                                             | Mitochondrion matrix.                                                                                                  |  | 0 |
| P41250 |    |    | 7  | 8  |    |     |    |    |    |     | Glycyl-tRNA synthetase, Glycine-tRNA ligase, GlyRS                                                                                                                                                                        | Entry not found!                                                                                                       |  | 0 |
| P42167 | 15 | 11 |    |    |    |     | 10 | 18 | 6  | 82  | Lamina-associated polypeptide 2, isoforms beta/gamma, Thymopoietin, isoforms beta/gamma, TP beta/gamma, Thymopoietin-related peptide isoforms beta/gamma, TPRP isoforms beta/gamma                                        | Nucleus inner membrane; Single-pass type II membrane protein. Note=Tightly associated with the nuclear lamina.         |  | 1 |
| P43243 |    |    | 5  |    |    |     |    |    |    |     | Matrin-3                                                                                                                                                                                                                  | Nucleus matrix.                                                                                                        |  | 0 |
| P43358 |    |    |    | 15 |    |     |    |    |    |     | Melanoma-associated antigen 4, MAGE-4 antigen, MAGE-X2, MAGE-41, Cancer/testis antigen 1.4, CT1.4                                                                                                                         | Entry not found!                                                                                                       |  | 0 |
| P43490 | 16 | 11 | 44 | 63 | 71 | 115 | 2  |    | 91 | 121 | Nicotinamide phosphoribosyltransferase, NAMPTase, Nampt, Pre-B cell-enhancing factor, Pre-B-cell colony-enhancing factor 1, Visfatin                                                                                      | Cytoplasm (By similarity).                                                                                             |  | 0 |
| P45880 |    |    | 3  |    |    | 5   |    |    |    | 14  | Voltage-dependent anion-selective channel protein 2, VDACC2, hVDACC2, Outer mitochondrial membrane protein porin 2                                                                                                        | Mitochondrion outer membrane.                                                                                          |  | 0 |

## Total Protein Identified

|        |    |    |    |    |    |    |    |    |    |                                                                            |                                                                                                                                                                                                                                                                |                                                                                                               |   |
|--------|----|----|----|----|----|----|----|----|----|----------------------------------------------------------------------------|----------------------------------------------------------------------------------------------------------------------------------------------------------------------------------------------------------------------------------------------------------------|---------------------------------------------------------------------------------------------------------------|---|
| P46013 |    |    |    | 2  |    |    |    |    |    | Antigen KI-67                                                              | Nucleus. Note=Predominantly localized in the G1 phase in the perinucleolar region, in the later phases it is also detected throughout the nuclear interior, being predominantly localized in the nuclear matrix. In mitosis, it is present on all chromosomes. |                                                                                                               | 0 |
| P46379 |    |    |    |    | 6  |    |    |    |    | Large proline-rich protein BAT3, HLA-B-associated transcript 3, Protein G3 | Nucleus. Note=The C-terminal fragment generated by caspase-3 is cytoplasmic.                                                                                                                                                                                   |                                                                                                               | 0 |
| P46778 | 34 | 21 | 32 |    |    | 24 |    | 26 |    | 60S ribosomal protein L21                                                  | Entry not found!                                                                                                                                                                                                                                               |                                                                                                               | 0 |
| P46782 | 13 | 9  | 20 |    | 3  |    |    | 16 | 9  | 40S ribosomal protein S5                                                   | Entry not found!                                                                                                                                                                                                                                               |                                                                                                               | 0 |
| P46783 | 4  |    |    |    |    |    |    |    |    | 40S ribosomal protein S10                                                  | Cytoplasm.                                                                                                                                                                                                                                                     |                                                                                                               | 0 |
| P46821 |    |    |    |    | 6  |    | 3  |    | 7  | 17                                                                         | Microtubule-associated protein 1B, MAP 1B                                                                                                                                                                                                                      | Entry not found!                                                                                              | 0 |
| P46926 |    |    |    | 2  |    |    |    |    |    |                                                                            | Glucosamine-6-phosphate isomerase, Glucosamine-6-phosphate deaminase, GlcN6P deaminase, GNPDA, Oscillin                                                                                                                                                        | Cytoplasm (By similarity).                                                                                    | 0 |
| P46940 |    |    | 14 |    | 22 |    |    |    |    |                                                                            | Ras GTPase-activating-like protein IQGAP1, p195                                                                                                                                                                                                                | Cell membrane.                                                                                                | 0 |
| P47755 | 2  |    |    | 22 | 7  |    | 9  |    | 11 | 18                                                                         | F-actin-capping protein subunit alpha-2, CapZ alpha-2                                                                                                                                                                                                          | Entry not found!                                                                                              | 0 |
| P47756 |    |    |    |    |    |    | 10 |    |    |                                                                            | F-actin-capping protein subunit beta, CapZ beta                                                                                                                                                                                                                | Cytoplasm, cytoskeleton (By similarity).                                                                      | 0 |
| P48643 |    |    | 6  | 12 | 10 | 8  | 4  |    |    | 38                                                                         | T-complex protein 1 subunit epsilon, TCP-1-epsilon, CCT-epsilon                                                                                                                                                                                                | Cytoplasm.                                                                                                    | 0 |
| P48668 |    |    |    |    |    |    | 61 |    |    |                                                                            | Keratin, type II cytoskeletal 6C, Cytokeratin-6C, CK 6C, K6c keratin, Cytokeratin-6E, CK 6E, Keratin K6h                                                                                                                                                       | Entry not found!                                                                                              | 0 |
| P49006 | 3  | 4  | 2  |    |    |    |    |    |    |                                                                            | MARCKS-related protein, MARCKS-like protein 1, Macrophage myristoylated alanine-rich C kinase substrate, Mac-MARCKS, MacMARCKS                                                                                                                                 | Entry not found!                                                                                              | 0 |
| P49321 |    |    |    |    |    |    | 2  |    |    | 4                                                                          | Nuclear autoantigenic sperm protein, NASP                                                                                                                                                                                                                      | Cytoplasm (By similarity). Nucleus.                                                                           | 0 |
| P49327 |    |    | 45 | 6  | 3  |    |    |    |    |                                                                            | Fatty acid synthase                                                                                                                                                                                                                                            | Cytoplasm. Melanosome. Note=Identified by mass spectrometry in melanosome fractions from stage I to stage IV. | 0 |
| P49366 |    |    | 7  |    | 17 | 7  |    |    | 14 | 42                                                                         | Deoxyhypusine synthase, DHS                                                                                                                                                                                                                                    | Entry not found!                                                                                              | 0 |
| P49419 |    |    |    | 6  |    |    |    | 3  |    | 10                                                                         | Alpha-aminoacidic semialdehyde dehydrogenase, Alpha-AASA dehydrogenase, Delta1-piperidine-6-carboxylate dehydrogenase, P6c dehydrogenase, Aldehyde dehydrogenase family 7 member A1, Antiquitin-1                                                              | Entry not found!                                                                                              | 0 |
| P49588 |    |    | 7  |    |    |    |    |    |    |                                                                            | Alanyl-tRNA synthetase, cytoplasmic, Alanine--tRNA ligase, AlaRS, Renal carcinoma antigen NY-REN-42                                                                                                                                                            | Cytoplasm (Potential).                                                                                        | 0 |
| P49902 |    | 4  |    |    |    |    |    |    |    |                                                                            | Cytosolic purine 5'-nucleotidase, 5'-nucleotidase cytosolic II                                                                                                                                                                                                 | Cytoplasm.                                                                                                    | 0 |
| P50395 |    |    |    | 28 |    |    |    |    |    | 10                                                                         | Rab GDP dissociation inhibitor beta, Rab GDI beta, Guanosine diphosphate dissociation inhibitor 2, GDI-2                                                                                                                                                       | Cytoplasm (By similarity). Membrane; Peripheral membrane protein (By similarity).                             | 0 |
| P50502 |    |    |    |    | 2  |    | 4  |    |    |                                                                            | Hsc70-interacting protein, Hip, Suppression of tumorigenicity protein 13, Putative tumor suppressor ST13, Protein FAM10A1, Progesterone receptor-associated p48 protein, Renal carcinoma antigen NY-REN-33                                                     | Cytoplasm (By similarity).                                                                                    | 0 |
| P50914 | 7  |    | 11 |    |    |    |    |    |    |                                                                            | 60S ribosomal protein L14, CAG-ISL 7                                                                                                                                                                                                                           | Entry not found!                                                                                              | 0 |
| P50990 |    |    |    |    |    |    |    |    |    | 10                                                                         | T-complex protein 1 subunit theta, TCP-1-theta, CCT-theta, Renal carcinoma antigen NY-REN-15                                                                                                                                                                   | Cytoplasm.                                                                                                    | 0 |

## Total Protein Identified

|        |    |    |    |    |    |    |    |    |    |                                                                                                                                                                              |                                                                                                                                                                                                                                              |                                                                                                                                                                                                                                                      |    |
|--------|----|----|----|----|----|----|----|----|----|------------------------------------------------------------------------------------------------------------------------------------------------------------------------------|----------------------------------------------------------------------------------------------------------------------------------------------------------------------------------------------------------------------------------------------|------------------------------------------------------------------------------------------------------------------------------------------------------------------------------------------------------------------------------------------------------|----|
| P50991 |    |    |    | 8  |    |    |    | 7  | 19 | T-complex protein 1 subunit delta, TCP-1-delta, CCT-delta, Stimulator of TAR RNA-binding                                                                                     | Cytoplasm. Melanosome. Note=Identified by mass spectrometry in melanosome fractions from stage I to stage IV.                                                                                                                                |                                                                                                                                                                                                                                                      | 0  |
| P51572 | 7  | 8  |    |    |    | 16 | 10 | 18 | 5  | B-cell receptor-associated protein 31, BCR-associated protein Bap31, p28 Bap31, Protein CDM, 6C6-AG tumor-associated antigen                                                 | Endoplasmic reticulum membrane; Multi-pass membrane protein. Endoplasmic reticulum-Golgi intermediate compartment membrane; Multi-pass membrane protein. Note=May shuttle between the ER and the intermediate compartment/cis-Golgi complex. |                                                                                                                                                                                                                                                      | 3  |
| P51610 | 18 | 14 |    |    |    | 23 | 19 | 35 |    | Host cell factor, HCF, HCF-1, C1 factor, VP16 accessory protein, VCAF, CFF                                                                                                   | Nucleus.                                                                                                                                                                                                                                     |                                                                                                                                                                                                                                                      | 0  |
| P51665 | 2  |    |    | 14 | 9  |    |    | 12 | 14 | 26S proteasome non-ATPase regulatory subunit 7, 26S proteasome regulatory subunit rpn8, 26S proteasome regulatory subunit S12, Proteasome subunit p40, Mov34 protein homolog | Entry not found!                                                                                                                                                                                                                             |                                                                                                                                                                                                                                                      | 0  |
| P52209 |    |    |    | 16 |    |    |    |    |    | 6-phosphogluconate dehydrogenase, decarboxylating                                                                                                                            | Entry not found!                                                                                                                                                                                                                             |                                                                                                                                                                                                                                                      | 0  |
| P52272 |    |    | 8  | 10 | 12 |    | 8  | 24 | 57 | Heterogeneous nuclear ribonucleoprotein M, hnRNP M                                                                                                                           | Nucleus, nucleolus.                                                                                                                                                                                                                          |                                                                                                                                                                                                                                                      | 0  |
| P52565 |    |    |    | 8  |    |    | 8  | 5  | 11 | Rho GDP-dissociation inhibitor 1, Rho GDI 1, Rho-GDI alpha                                                                                                                   | Cytoplasm.                                                                                                                                                                                                                                   |                                                                                                                                                                                                                                                      | 0  |
| P52597 |    |    | 11 |    |    |    |    |    |    | Heterogeneous nuclear ribonucleoprotein F, hnRNP F, Nucleolin-like protein mcs94-1                                                                                           | Nucleus, nucleoplasm.                                                                                                                                                                                                                        |                                                                                                                                                                                                                                                      | 0  |
| P52815 |    |    |    |    |    |    |    | 5  | 5  | 39S ribosomal protein L12, mitochondrial precursor, L12mt, MRP-L12, 5c5-2                                                                                                    | Mitochondrion.                                                                                                                                                                                                                               |                                                                                                                                                                                                                                                      | 0  |
| P52907 |    |    |    | 14 | 4  |    | 5  |    |    | F-actin-capping protein subunit alpha-1, CapZ alpha-1                                                                                                                        | Entry not found!                                                                                                                                                                                                                             |                                                                                                                                                                                                                                                      | 0  |
| P53365 |    | 2  |    |    | 7  | 4  |    | 5  | 7  | Arfaptin-2, ADP-ribosylation factor-interacting protein 2, Partner of RAC1, Protein POR1                                                                                     | Entry not found!                                                                                                                                                                                                                             |                                                                                                                                                                                                                                                      | 0  |
| P53367 | 21 | 16 | 3  |    | 14 |    | 3  | 6  | 6  | 19                                                                                                                                                                           | Arfaptin-1, ADP-ribosylation factor-interacting protein 1                                                                                                                                                                                    | Entry not found!                                                                                                                                                                                                                                     | 0  |
| P53985 | 11 |    |    |    |    |    |    | 6  |    |                                                                                                                                                                              | Monocarboxylate transporter 1, MCT 1, Solute carrier family 16 member 1                                                                                                                                                                      | Cell membrane; Multi-pass membrane protein.                                                                                                                                                                                                          | 12 |
| P53999 |    |    |    |    | 16 |    |    |    |    |                                                                                                                                                                              | Activated RNA polymerase II transcriptional coactivator p15, SUB1 homolog, Positive cofactor 4, PC4, p14                                                                                                                                     | Nucleus.                                                                                                                                                                                                                                             | 0  |
| P54577 | 26 | 40 | 14 | 10 | 13 | 8  | 4  |    | 34 | 33                                                                                                                                                                           | Tyrosyl-tRNA synthetase, cytoplasmic, Tyrosyl-tRNA ligase, TyrRS                                                                                                                                                                             | Cytoplasm.                                                                                                                                                                                                                                           | 0  |
| P54727 |    | 15 |    |    |    | 7  | 7  | 5  |    |                                                                                                                                                                              | UV excision repair protein RAD23 homolog B, hHR23B, XP-C repair-complementing complex 58 kDa protein, p58                                                                                                                                    | Nucleus. Cytoplasm (By similarity).                                                                                                                                                                                                                  | 0  |
| P54819 | 35 | 7  |    |    |    |    | 3  | 17 |    | 12                                                                                                                                                                           | Adenylate kinase isoenzyme 2, mitochondrial, ATP-AMP transphosphorylase                                                                                                                                                                      | Mitochondrion intermembrane space.                                                                                                                                                                                                                   | 0  |
| P55010 |    |    |    |    |    |    |    |    | 9  |                                                                                                                                                                              | Eukaryotic translation initiation factor 5, eIF-5                                                                                                                                                                                            | Entry not found!                                                                                                                                                                                                                                     | 0  |
| P55060 |    |    | 10 |    |    |    |    |    |    |                                                                                                                                                                              | Exportin-2, Exp2, Importin-alpha re-exporter, Chromosome segregation 1-like protein, Cellular apoptosis susceptibility protein                                                                                                               | Cytoplasm. Nucleus. Note=Shuttles between the nucleus and the cytoplasm.                                                                                                                                                                             | 0  |
| P55072 |    |    |    |    | 4  |    |    |    |    | 3                                                                                                                                                                            | Transitional endoplasmic reticulum ATPase, TER ATPase, 15S Mg(2+)-ATPase p97 subunit, Valosin-containing protein, VCP                                                                                                                        | Cytoplasm. Nucleus. Note=Present in the neuronal hyaline inclusion bodies specifically found in motor neurons from amyotrophic lateral sclerosis patients. Present in the Lewy bodies specifically found in neurons from Parkinson disease patients. | 0  |
| P55209 |    |    |    |    |    |    |    | 6  | 23 |                                                                                                                                                                              | Nucleosome assembly protein 1-like 1, NAP-1-related protein, hnRP                                                                                                                                                                            | Nucleus. Melanosome. Note=Identified by mass spectrometry in melanosome fractions from stage I to stage IV.                                                                                                                                          | 0  |



## Total Protein Identified

|        |    |    |    |    |     |    |     |    |     |                                                                                                                               |                                                                                                                                                                                                                                                                                    |                                                                                                                                                                                 |   |   |
|--------|----|----|----|----|-----|----|-----|----|-----|-------------------------------------------------------------------------------------------------------------------------------|------------------------------------------------------------------------------------------------------------------------------------------------------------------------------------------------------------------------------------------------------------------------------------|---------------------------------------------------------------------------------------------------------------------------------------------------------------------------------|---|---|
| P55769 |    |    |    |    |     |    |     |    | 10  | NHP2-like protein 1, High mobility group-like nuclear protein 2 homolog 1, U4/U6.U5 tri-snRNP 15.5 kDa protein, OTK27, hSNU13 | Nucleus, nucleolus.<br>Note=Concentrated in the dense fibrillar component of the nucleolus.                                                                                                                                                                                        |                                                                                                                                                                                 | 0 |   |
| P56134 |    |    |    |    |     |    |     |    | 8   | ATP synthase subunit f, mitochondrial                                                                                         | Mitochondrion. Mitochondrion inner membrane.                                                                                                                                                                                                                                       |                                                                                                                                                                                 | 0 |   |
| P56537 | 7  |    | 9  | 4  |     |    | 5   | 5  |     | Eukaryotic translation initiation factor 6, eIF-6, B4 integrin interactor, CAB, p27(BBP), B(2)GCN homolog                     | Cytoplasm. Nucleus.                                                                                                                                                                                                                                                                |                                                                                                                                                                                 | 0 |   |
| P56693 |    |    | 2  |    |     |    |     |    |     | Transcription factor SOX-10                                                                                                   | Cytoplasm. Nucleus.                                                                                                                                                                                                                                                                |                                                                                                                                                                                 | 0 |   |
| P59998 |    |    |    |    | 7   | 3  | 25  |    |     | Actin-related protein 2/3 complex subunit 4, Arp2/3 complex 20 kDa subunit, p20-ARC                                           | Cytoplasm, cytoskeleton. Cell projection.                                                                                                                                                                                                                                          |                                                                                                                                                                                 | 0 |   |
| P60033 | 5  | 8  |    |    |     |    | 13  | 20 |     | CD81 antigen, 26 kDa cell surface protein TAPA-1, Target of the antiproliferative antibody 1, Tetraspanin-28, Tspan-28        | Membrane; Multi-pass membrane protein.                                                                                                                                                                                                                                             |                                                                                                                                                                                 | 4 |   |
| P60174 | 8  | 13 | 35 | 93 | 27  | 4  | 75  | 60 | 119 | Triosephosphate isomerase, TIM, Triose-phosphate isomerase                                                                    | Entry not found!                                                                                                                                                                                                                                                                   |                                                                                                                                                                                 | 0 |   |
| P60660 |    |    |    |    | 15  |    | 32  |    | 3   | 9                                                                                                                             | Myosin light polypeptide 6, Smooth muscle and nonmuscle myosin light chain alkali 6, Myosin light chain alkali 3, Myosin light chain 3, MLC-3, LC17                                                                                                                                | Entry not found!                                                                                                                                                                |   | 0 |
| P60709 | 26 | 37 | 65 |    | 261 | 76 | 154 | 37 | 209 |                                                                                                                               | Actin, cytoplasmic 1, Beta-actin                                                                                                                                                                                                                                                   | Cytoplasm, cytoskeleton.                                                                                                                                                        |   | 0 |
| P60866 |    |    | 9  | 9  |     | 4  | 15  | 4  |     |                                                                                                                               | 40S ribosomal protein S20                                                                                                                                                                                                                                                          | Entry not found!                                                                                                                                                                |   | 0 |
| P60903 |    |    |    |    | 8   |    |     |    |     |                                                                                                                               | Protein S100-A10, S100 calcium-binding protein A10, Calpactin-1 light chain, Calpactin I light chain, p10 protein, p11, Cellular ligand of annexin II                                                                                                                              | Entry not found!                                                                                                                                                                |   | 0 |
| P61019 |    |    |    |    |     |    | 5   |    | 4   |                                                                                                                               | Ras-related protein Rab-2A                                                                                                                                                                                                                                                         | Endoplasmic reticulum-Golgi intermediate compartment membrane; Lipid-anchor. Melanosome. Note=Identified by mass spectrometry in melanosome fractions from stage I to stage IV. |   | 0 |
| P61088 |    |    |    |    | 12  |    | 2   |    | 4   |                                                                                                                               | Ubiquitin-conjugating enzyme E2 N, Ubiquitin-protein ligase N, Ubiquitin carrier protein N, Ubc13, Bendless-like ubiquitin-conjugating enzyme                                                                                                                                      | Entry not found!                                                                                                                                                                |   | 0 |
| P61106 | 18 | 7  |    |    |     |    |     | 4  |     |                                                                                                                               | Ras-related protein Rab-14                                                                                                                                                                                                                                                         | Cell membrane; Lipid-anchor; Cytoplasmic side (Potential).                                                                                                                      |   | 0 |
| P61158 |    |    | 2  |    |     |    |     |    |     |                                                                                                                               | Actin-related protein 3, Actin-like protein 3                                                                                                                                                                                                                                      | Cytoplasm, cytoskeleton. Cell projection.                                                                                                                                       |   | 0 |
| P61247 | 10 | 5  | 12 |    |     |    |     | 10 |     |                                                                                                                               | 40S ribosomal protein S3a                                                                                                                                                                                                                                                          | Entry not found!                                                                                                                                                                |   | 0 |
| P61289 | 8  | 5  |    | 23 | 4   | 22 | 14  |    | 33  | 36                                                                                                                            | Proteasome activator complex subunit 3, Proteasome activator 28 subunit gamma, PA28gamma, PA28g, Activator of multicatalytic protease subunit 3, 11S regulator complex subunit gamma, REG-gamma, Ki nuclear autoantigen                                                            | Entry not found!                                                                                                                                                                |   | 0 |
| P61353 | 8  | 4  |    | 9  |     |    |     |    |     |                                                                                                                               | 60S ribosomal protein L27                                                                                                                                                                                                                                                          | Entry not found!                                                                                                                                                                |   | 0 |
| P61457 |    |    |    |    | 4   |    | 8   |    |     |                                                                                                                               | Pterin-4-alpha-carbinolamine dehydratase, PHS, 4-alpha-hydroxy-tetrahydropterin dehydratase, Phenylalanine hydroxylase-stimulating protein, Pterin carbinolamine dehydratase, PCD, Dimerization cofactor of hepatocyte nuclear factor 1-alpha, Dimerization cofactor of HNF1, DCoH | Cytoplasm. Nucleus.<br>Note=Cytoplasmic and/or nuclear.                                                                                                                         |   | 0 |
| P61604 | 12 | 13 |    |    | 2   | 24 | 6   | 22 |     | 34                                                                                                                            | 10 kDa heat shock protein, mitochondrial, Hsp10, 10 kDa chaperonin, CPN10, Early-pregnancy factor, EPF                                                                                                                                                                             | Mitochondrion matrix.                                                                                                                                                           |   | 0 |
| P61626 | 7  | 9  |    |    |     |    |     |    |     |                                                                                                                               | Lysozyme C precursor, 1,4-beta-N-acetylmuramidase C                                                                                                                                                                                                                                | Entry not found!                                                                                                                                                                |   | 0 |
| P61758 |    |    |    |    | 3   |    | 7   |    |     |                                                                                                                               | Prefoldin subunit 3, Von Hippel-Lindau-binding protein 1, VHL-binding protein 1, VBP-1, HIBBJ46                                                                                                                                                                                    | Cytoplasm. Nucleus. Note=In complex with VHL can translocate to the nucleus.                                                                                                    |   | 0 |
| P61803 |    |    |    |    |     |    |     | 5  |     |                                                                                                                               | Dolichyl-diphosphooligosaccharide--protein glycosyltransferase subunit DAD1, Oligosaccharyl transferase subunit DAD1, Defender against cell death 1, DAD-1                                                                                                                         | Membrane; Multi-pass membrane protein (Potential).                                                                                                                              |   | 2 |

## Total Protein Identified

|        |    |    |    |    |    |    |  |  |    |     |                                                                                                                   |                                                                                                                                                                                                                                                                                                                                                                                                  |  |   |
|--------|----|----|----|----|----|----|--|--|----|-----|-------------------------------------------------------------------------------------------------------------------|--------------------------------------------------------------------------------------------------------------------------------------------------------------------------------------------------------------------------------------------------------------------------------------------------------------------------------------------------------------------------------------------------|--|---|
| P61923 |    |    |    | 5  |    |    |  |  |    |     | Coatomer subunit zeta-1, Zeta-1-coat protein, Zeta-1 COP                                                          | Cytoplasm (By similarity). Golgi apparatus membrane; Peripheral membrane protein; Cytoplasmic side (By similarity). Cytoplasmic vesicle, COPI-coated vesicle membrane; Peripheral membrane protein; Cytoplasmic side (By similarity). Note=The coatomer is cytoplasmic or polymerized on the cytoplasmic side of the Golgi, as well as on the vesicles/buds originating from it (By similarity). |  | 0 |
| P61978 | 4  | 5  | 21 |    | 12 | 8  |  |  | 11 | 23  | Heterogeneous nuclear ribonucleoprotein K, hnRNP K, Transformation up-regulated nuclear protein, TUNP             | Cytoplasm. Nucleus, nucleoplasm.                                                                                                                                                                                                                                                                                                                                                                 |  | 0 |
| P61981 |    |    |    | 21 | 10 |    |  |  |    | 19  | 14-3-3 protein gamma, Protein kinase C inhibitor protein 1, KCIP-1                                                | Cytoplasm (By similarity).                                                                                                                                                                                                                                                                                                                                                                       |  | 0 |
| P62081 | 12 | 12 | 22 | 40 |    | 16 |  |  | 24 | 15  | 40S ribosomal protein S7                                                                                          | Entry not found!                                                                                                                                                                                                                                                                                                                                                                                 |  | 0 |
| P62158 |    |    |    |    | 6  |    |  |  |    |     | Calmodulin, CaM                                                                                                   | Spindle. Note=Distributed throughout the cell during interphase, but during mitosis becomes dramatically localized to the spindle poles and the spindle microtubules.                                                                                                                                                                                                                            |  | 0 |
| P62166 |    |    |    |    | 4  |    |  |  |    |     | Neuronal calcium sensor 1, NCS-1, Frequentin homolog, Frequentin-like protein, Frequentin-like ubiquitous protein | Golgi apparatus, Golgi stack membrane; Peripheral membrane protein. Note=Associated with Golgi stacks. Post-synaptic densities of dendrites, and in the pre-synaptic nerve terminal at neuromuscular junctions.                                                                                                                                                                                  |  | 0 |
| P62191 |    |    |    |    | 6  |    |  |  |    | 9   | 26S protease regulatory subunit 4, P26s4, Proteasome 26S subunit ATPase 1                                         | Cytoplasm. Nucleus.                                                                                                                                                                                                                                                                                                                                                                              |  | 0 |
| P62241 |    |    |    |    | 4  |    |  |  |    |     | 40S ribosomal protein S8                                                                                          | Entry not found!                                                                                                                                                                                                                                                                                                                                                                                 |  | 0 |
| P62249 |    |    | 5  |    |    |    |  |  |    |     | 40S ribosomal protein S16                                                                                         | Entry not found!                                                                                                                                                                                                                                                                                                                                                                                 |  | 0 |
| P62258 | 6  | 8  | 17 | 93 | 44 |    |  |  | 20 | 117 | 14-3-3 protein epsilon, 14-3-3E                                                                                   | Cytoplasm (By similarity). Melanosome. Note=Identified by mass spectrometry in melanosome fractions from stage I to stage IV.                                                                                                                                                                                                                                                                    |  | 0 |
| P62263 | 5  |    |    |    |    |    |  |  |    | 9   | 40S ribosomal protein S14                                                                                         | Entry not found!                                                                                                                                                                                                                                                                                                                                                                                 |  | 0 |
| P62269 |    |    | 15 |    |    |    |  |  |    |     | 40S ribosomal protein S18, Ke-3, Ke3                                                                              | Cytoplasm.                                                                                                                                                                                                                                                                                                                                                                                       |  | 0 |
| P62277 | 21 | 21 | 42 | 15 |    | 16 |  |  | 31 |     | 40S ribosomal protein S13                                                                                         | Entry not found!                                                                                                                                                                                                                                                                                                                                                                                 |  | 0 |
| P62304 | 10 |    | 14 |    |    |    |  |  |    |     | Small nuclear ribonucleoprotein E, snRNP-E, Sm protein E, Sm-E, SmE                                               | Nucleus.                                                                                                                                                                                                                                                                                                                                                                                         |  | 0 |
| P62314 | 6  | 4  |    | 16 |    |    |  |  |    |     | Small nuclear ribonucleoprotein Sm D1, snRNP core protein D1, Sm-D1, Sm-D autoantigen                             | Nucleus.                                                                                                                                                                                                                                                                                                                                                                                         |  | 0 |
| P62316 | 7  | 3  |    |    |    |    |  |  |    |     | Small nuclear ribonucleoprotein Sm D2, snRNP core protein D2, Sm-D2                                               | Nucleus.                                                                                                                                                                                                                                                                                                                                                                                         |  | 0 |
| P62424 | 31 | 21 | 47 | 16 |    |    |  |  | 49 |     | 60S ribosomal protein L7a, Surfeit locus protein 3, PLA-X polypeptide                                             | Entry not found!                                                                                                                                                                                                                                                                                                                                                                                 |  | 0 |

## Total Protein Identified

|        |     |     |     |     |    |    |    |     |     |     |                                                                                                                                     |                                                                                                                                                                                                                                 |                                                                                                                                                                                          |   |   |
|--------|-----|-----|-----|-----|----|----|----|-----|-----|-----|-------------------------------------------------------------------------------------------------------------------------------------|---------------------------------------------------------------------------------------------------------------------------------------------------------------------------------------------------------------------------------|------------------------------------------------------------------------------------------------------------------------------------------------------------------------------------------|---|---|
| P62491 | 2   |     |     | 3   |    |    |    |     | 21  |     | Ras-related protein Rab-11A, Rab-11, YL8                                                                                            | Cell membrane; Peripheral membrane protein. Recycling endosome membrane; Peripheral membrane protein. Note=Translocates with RAB11FIP2 from the vesicles of the endocytic recycling compartment (ERC) to the plasma membrane.   |                                                                                                                                                                                          | 0 |   |
| P62701 | 5   |     |     | 6   |    |    |    |     |     |     | 40S ribosomal protein S4, X isoform, Single copy abundant mRNA protein, SCR10                                                       | Entry not found!                                                                                                                                                                                                                |                                                                                                                                                                                          | 0 |   |
| P62750 |     |     |     | 13  | 3  |    |    |     |     |     | 60S ribosomal protein L23a                                                                                                          | Entry not found!                                                                                                                                                                                                                |                                                                                                                                                                                          | 0 |   |
| P62807 | 322 | 398 | 901 |     | 34 |    | 60 | 659 | 101 | 336 | Histone H2B type 1-C/E/F/G/I, H2B.a/g/h/k/l, H2B.1 A, H2B/a, H2B/g, H2B/h, H2B/k, H2B/l                                             | Nucleus.                                                                                                                                                                                                                        |                                                                                                                                                                                          | 0 |   |
| P62820 |     |     |     | 9   |    |    |    |     |     |     | Ras-related protein Rab-1A, YPT1-related protein                                                                                    | Golgi apparatus.                                                                                                                                                                                                                |                                                                                                                                                                                          | 0 |   |
| P62826 |     |     |     |     | 9  |    |    |     |     | 7   | GTP-binding nuclear protein Ran, GTPase Ran, Ras-like protein TC4, Androgen receptor-associated protein 24                          | Nucleus. Cytoplasm. Melanosome. Note=Becomes dispersed throughout the cytoplasm during mitosis. Identified by mass spectrometry in melanosome fractions from stage I to stage IV.                                               |                                                                                                                                                                                          | 0 |   |
| P62829 |     |     |     | 16  | 6  |    |    |     |     | 12  | 60S ribosomal protein L23, Ribosomal protein L17                                                                                    | Entry not found!                                                                                                                                                                                                                |                                                                                                                                                                                          | 0 |   |
| P62841 |     |     |     |     | 13 |    |    |     |     |     | 40S ribosomal protein S15, RIG protein                                                                                              | Entry not found!                                                                                                                                                                                                                |                                                                                                                                                                                          | 0 |   |
| P62847 | 7   | 11  | 14  |     |    |    |    |     |     | 16  | 40S ribosomal protein S24                                                                                                           | Entry not found!                                                                                                                                                                                                                |                                                                                                                                                                                          | 0 |   |
| P62851 | 7   | 4   |     |     |    |    |    |     |     |     | 40S ribosomal protein S25                                                                                                           | Entry not found!                                                                                                                                                                                                                |                                                                                                                                                                                          | 0 |   |
| P62854 | 30  | 23  | 31  |     |    | 8  |    | 56  |     |     | 40S ribosomal protein S26                                                                                                           | Entry not found!                                                                                                                                                                                                                |                                                                                                                                                                                          | 0 |   |
| P62888 | 9   | 10  | 16  | 7   | 8  |    | 6  | 9   | 8   | 6   | 60S ribosomal protein L30                                                                                                           | Entry not found!                                                                                                                                                                                                                |                                                                                                                                                                                          | 0 |   |
| P62899 |     | 2   |     |     |    |    |    |     |     |     | 60S ribosomal protein L31                                                                                                           | Entry not found!                                                                                                                                                                                                                |                                                                                                                                                                                          | 0 |   |
| P62906 | 13  | 4   | 12  |     |    |    |    | 7   |     |     | 60S ribosomal protein L10a, CSA-19, Protein NEDD6, Neural precursor cell expressed developmentally down-regulated protein 6, NEDD-6 | Entry not found!                                                                                                                                                                                                                |                                                                                                                                                                                          | 0 |   |
| P62917 | 5   | 3   |     |     |    |    |    |     |     |     | 60S ribosomal protein L8                                                                                                            | Cytoplasm.                                                                                                                                                                                                                      |                                                                                                                                                                                          | 0 |   |
| P62942 |     |     |     | 8   | 7  |    |    |     |     | 7   | FK506-binding protein 1A, Peptidyl-prolyl cis-trans isomerase, PPIase, Rotamase, 12 kDa FKBP, FKBP-12, Immunophilin FKBP12          | Cytoplasm.                                                                                                                                                                                                                      |                                                                                                                                                                                          | 0 |   |
| P63104 | 6   | 9   | 41  | 78  | 50 | 16 | 24 |     |     | 85  | 93                                                                                                                                  | 14-3-3 protein zeta/delta, Protein kinase C inhibitor protein 1, KCIP-1                                                                                                                                                         | Cytoplasm. Melanosome. Note=Identified by mass spectrometry in melanosome fractions from stage I to stage IV.                                                                            |   | 0 |
| P63208 |     |     |     |     | 3  |    |    |     |     |     |                                                                                                                                     | S-phase kinase-associated protein 1, Cyclin A/CDK2-associated protein p19, p19A, p19skp1, RNA polymerase II elongation factor-like protein, Organ of Corti protein 2, OCP-2, OCP-II, Transcription elongation factor B, SIII    | Entry not found!                                                                                                                                                                         |   | 0 |
| P63241 |     |     |     | 7   | 7  |    | 8  |     |     |     |                                                                                                                                     | Eukaryotic translation initiation factor 5A-1, eIF-5A-1, eIF-5A1, Eukaryotic initiation factor 5A isoform 1, eIF-5A, eIF-4D, Rev-binding factor                                                                                 | Nucleus.                                                                                                                                                                                 |   | 0 |
| P63261 |     |     |     | 151 |    |    |    |     |     |     | 285                                                                                                                                 | Actin, cytoplasmic 2, Gamma-actin                                                                                                                                                                                               | Cytoplasm, cytoskeleton.                                                                                                                                                                 |   | 0 |
| P67809 | 8   | 7   |     | 15  |    | 11 | 3  |     |     |     |                                                                                                                                     | Nuclease-sensitive element-binding protein 1, Y-box-binding protein 1, Y-box transcription factor, YB-1, CCAAT-binding transcription factor I subunit A, CBF-A, Enhancer factor I subunit A, EFI-A, DNA-binding protein B, DBPB | Cytoplasm. Nucleus. Note=Shuttles between nucleus and cytoplasm. Predominantly cytoplasmic in proliferating cells. Cytotoxic stress and DNA damage enhance translocation to the nucleus. |   | 0 |
| P67936 |     |     |     |     | 23 | 8  | 40 | 9   | 14  | 6   |                                                                                                                                     | Tropomyosin alpha-4 chain, Tropomyosin-4, TM30p1                                                                                                                                                                                | Entry not found!                                                                                                                                                                         |   | 0 |
| P68032 |     |     |     | 14  | 10 |    |    |     |     | 13  |                                                                                                                                     | Actin, alpha cardiac muscle 1, Alpha-cardiac actin                                                                                                                                                                              | Cytoplasm, cytoskeleton.                                                                                                                                                                 |   | 0 |

## Total Protein Identified

|        |    |    |    |    |     |    |    |     |    |    |                                                                                                                                               |                                                                                                                                                                                                                                          |  |   |
|--------|----|----|----|----|-----|----|----|-----|----|----|-----------------------------------------------------------------------------------------------------------------------------------------------|------------------------------------------------------------------------------------------------------------------------------------------------------------------------------------------------------------------------------------------|--|---|
| P68036 |    |    |    |    | 4   |    |    |     |    |    | Ubiquitin-conjugating enzyme E2 L3, Ubiquitin-protein ligase L3, Ubiquitin carrier protein L3, UbcH7, E2-F1, L-UBC                            | Entry not found!                                                                                                                                                                                                                         |  | 0 |
| P68133 |    |    |    |    |     |    |    |     | 15 |    | Actin, alpha skeletal muscle, Alpha-actin-1                                                                                                   | Cytoplasm, cytoskeleton.                                                                                                                                                                                                                 |  | 0 |
| P68363 |    |    |    |    | 86  |    | 23 |     | 95 |    | Tubulin alpha-1B chain, Tubulin alpha-ubiquitous chain, Alpha-tubulin ubiquitous, Tubulin K-alpha-1                                           | Entry not found!                                                                                                                                                                                                                         |  | 0 |
| P68371 | 34 |    |    | 14 | 113 |    |    |     | 20 | 27 | Tubulin beta-2C chain, Tubulin beta-2 chain                                                                                                   | Entry not found!                                                                                                                                                                                                                         |  | 0 |
| P68431 | 96 |    |    |    | 7   | 58 | 4  | 258 | 11 | 37 | Histone H3.1, H3/a, H3/b, H3/c, H3/d, H3/f, H3/h, H3/i, H3/j, H3/k, H3/l                                                                      | Nucleus.                                                                                                                                                                                                                                 |  | 0 |
| P78371 |    |    |    | 7  | 32  |    |    |     |    | 45 | T-complex protein 1 subunit beta, TCP-1-beta, CCT-beta                                                                                        | Cytoplasm.                                                                                                                                                                                                                               |  | 0 |
| P78417 | 3  |    |    |    | 17  |    | 2  |     |    | 5  | Glutathione transferase omega-1, GSTO 1-1                                                                                                     | Cytoplasm.                                                                                                                                                                                                                               |  | 0 |
| P78527 |    |    |    | 22 |     |    |    |     |    |    | DNA-dependent protein kinase catalytic subunit, DNA-PK catalytic subunit, DNA-PKcs, DNPk1, p460                                               | Nucleus.                                                                                                                                                                                                                                 |  | 0 |
| P80303 |    |    |    |    |     |    |    |     |    | 24 | Nucleobindin-2 precursor, DNA-binding protein NEFA, Gastric cancer antigen Zg4                                                                | Membrane; Peripheral membrane protein. Cytoplasm. Secreted.                                                                                                                                                                              |  | 0 |
| P80723 |    |    |    |    |     |    | 15 | 14  |    | 17 | Brain acid soluble protein 1, BASP1 protein, Neuronal axonal membrane protein NAP-22, 22 kDa neuronal tissue-enriched acidic protein          | Membrane; Lipid-anchor. Cell projection, growth cone. Note=Associated with the membranes of growth cones that form the tips of elongating axons.                                                                                         |  | 0 |
| P83731 | 7  |    |    |    |     |    |    |     |    |    | 60S ribosomal protein L24, Ribosomal protein L30                                                                                              | Entry not found!                                                                                                                                                                                                                         |  | 0 |
| P84077 | 7  | 8  | 33 | 10 | 10  |    | 13 |     |    | 7  | ADP-ribosylation factor 1                                                                                                                     | Entry not found!                                                                                                                                                                                                                         |  | 0 |
| P84085 |    |    |    |    |     |    |    |     | 7  |    | ADP-ribosylation factor 5                                                                                                                     | Golgi apparatus.                                                                                                                                                                                                                         |  | 0 |
| P84103 |    |    | 5  |    | 10  |    |    |     |    |    | Splicing factor, arginine/serine-rich 3, Pre-mRNA-splicing factor SRP20                                                                       | Nucleus.                                                                                                                                                                                                                                 |  | 0 |
| P84243 |    | 25 | 86 |    |     |    |    |     |    |    | Histone H3.3                                                                                                                                  | Nucleus.                                                                                                                                                                                                                                 |  | 0 |
| Q00059 | 4  |    |    |    |     |    |    |     |    |    | Transcription factor A, mitochondrial precursor, mtTFA, Mitochondrial transcription factor 1, MtTF1, Transcription factor 6-like 2            | Mitochondrion.                                                                                                                                                                                                                           |  | 0 |
| Q00610 | 2  |    | 23 |    | 2   |    |    |     |    |    | Clathrin heavy chain 1, CLH-17                                                                                                                | Cytoplasmic vesicle membrane; Cytoplasmic side. Membrane, coated pit; Cytoplasmic side. Melanosome. Note=Cytoplasmic face of coated pits and vesicles. Identified by mass spectrometry in melanosome fractions from stage I to stage IV. |  | 0 |
| Q00688 |    |    |    | 4  |     |    | 4  |     |    |    | FK506-binding protein 3, Peptidyl-prolyl cis-trans isomerase, PPIase, Rotamase, 25 kDa FKBP, FKBP-25, Rapamycin-selective 25 kDa immunophilin | Nucleus.                                                                                                                                                                                                                                 |  | 0 |
| Q00765 |    |    |    |    |     |    |    | 5   |    | 6  | Receptor expression-enhancing protein 5, Polyposis locus protein 1, TB2 protein                                                               | Membrane; Multi-pass membrane protein (Potential).                                                                                                                                                                                       |  | 2 |
| Q00839 |    | 3  | 15 |    | 3   |    |    |     |    |    | Heterogeneous nuclear ribonucleoprotein U, hnRNP U, Scaffold attachment factor A, SAF-A, p120, pp120                                          | Nucleus. Cell surface. Note=Component of ribonucleosomes. Also found associated with the cell surface.                                                                                                                                   |  | 0 |

## Total Protein Identified

|        |    |    |    |   |    |    |    |    |    |                                                                                                                                                                                  |                                                                                                                                                                                                                                                                                                                                                                                                                                                                             |                                                                                                          |  |   |   |
|--------|----|----|----|---|----|----|----|----|----|----------------------------------------------------------------------------------------------------------------------------------------------------------------------------------|-----------------------------------------------------------------------------------------------------------------------------------------------------------------------------------------------------------------------------------------------------------------------------------------------------------------------------------------------------------------------------------------------------------------------------------------------------------------------------|----------------------------------------------------------------------------------------------------------|--|---|---|
| Q01105 | 36 | 25 | 11 |   | 2  |    | 7  | 29 | 8  | Protein SET, Phosphatase 2A inhibitor I2PP2A, I-2PP2A, Template-activating factor I, TAF-I, HLA-DR-associated protein II, PHAPII, Inhibitor of granzyme A-activated DNase, IGAAD | Cytoplasm, cytosol. Endoplasmic reticulum. Nucleus, nucleoplasm. Note=In the cytoplasm, found both in the cytosol and associated with the endoplasmic reticulum. Following CTL attack, moves rapidly to the nucleus, where it is found in the nucleoplasm, avoiding the nucleolus. Similar translocation to the nucleus is also observed for lymphocyte-activated killer cells after the addition of calcium. The SET complex is associated with the endoplasmic reticulum. |                                                                                                          |  | 0 |   |
| Q01130 | 3  | 4  |    |   |    |    |    |    |    | Splicing factor, arginine/serine-rich 2, Splicing factor SC35, SC-35, Splicing component, 35 kDa, Protein PR264                                                                  | Nucleus.                                                                                                                                                                                                                                                                                                                                                                                                                                                                    |                                                                                                          |  | 0 |   |
| Q01469 |    |    |    |   | 6  |    |    |    |    | Fatty acid-binding protein, epidermal, E-FABP, Fatty acid-binding protein 5, Psoriasis-associated fatty acid-binding protein homolog, PA-FABP                                    | Cytoplasm.                                                                                                                                                                                                                                                                                                                                                                                                                                                                  |                                                                                                          |  | 0 |   |
| Q01546 |    |    |    |   | 2  |    |    |    |    | Keratin, type II cytoskeletal 2 oral, Cytokeratin-2P, K2P, CK 2P, Keratin-76                                                                                                     | Entry not found!                                                                                                                                                                                                                                                                                                                                                                                                                                                            |                                                                                                          |  | 0 |   |
| Q01995 |    |    |    |   |    |    | 23 |    |    | Transgelin, Smooth muscle protein 22-alpha, SM22-alpha, WS3-10, 22 kDa actin-binding protein                                                                                     | Cytoplasm (Probable).                                                                                                                                                                                                                                                                                                                                                                                                                                                       |                                                                                                          |  | 0 |   |
| Q02790 |    |    |    |   |    |    |    | 2  |    | FK506-binding protein 4, Peptidyl-prolyl cis-trans isomerase, PPIase, Rotamase, HSP-binding immunophilin, HBI, FKBP52 protein, 52 kDa FK506-binding protein, FKBP59, p59 protein | Cytoplasm. Nucleus.                                                                                                                                                                                                                                                                                                                                                                                                                                                         |                                                                                                          |  | 0 |   |
| Q02878 | 16 | 27 | 47 | 3 |    |    |    | 25 |    | 60S ribosomal protein L6, TAX-responsive enhancer element-binding protein 107, TAXREB107, Neoplasm-related protein C140                                                          | Entry not found!                                                                                                                                                                                                                                                                                                                                                                                                                                                            |                                                                                                          |  | 0 |   |
| Q02952 |    |    |    |   |    |    |    |    | 5  | A-kinase anchor protein 12, A-kinase anchor protein 250 kDa, AKAP 250, Gravin, Myasthenia gravis autoantigen                                                                     | Cytoplasm, cell cortex (Probable). Cytoplasm, cytoskeleton (Probable). Note=May be part of the cortical cytoskeleton.                                                                                                                                                                                                                                                                                                                                                       |                                                                                                          |  | 0 |   |
| Q03252 |    |    |    |   |    |    |    |    | 5  | Lamin-B2                                                                                                                                                                         | Nucleus inner membrane; Lipid anchor; Nucleoplasmic side.                                                                                                                                                                                                                                                                                                                                                                                                                   |                                                                                                          |  | 0 |   |
| Q04637 |    |    |    |   | 5  |    |    |    | 6  | Eukaryotic translation initiation factor 4 gamma 1, eIF-4-gamma 1, eIF-4G1, eIF-4G 1, p220                                                                                       | Entry not found!                                                                                                                                                                                                                                                                                                                                                                                                                                                            |                                                                                                          |  | 0 |   |
| Q05519 | 13 | 16 |    |   |    | 16 |    |    | 26 | Splicing factor arginine/serine-rich 11, Arginine-rich 54 kDa nuclear protein, p54                                                                                               | Nucleus. Note=Colocalizes with spliceosome components.                                                                                                                                                                                                                                                                                                                                                                                                                      |                                                                                                          |  | 0 |   |
| Q05639 | 27 | 24 |    |   | 22 | 68 |    |    | 7  | 40                                                                                                                                                                               | Elongation factor 1-alpha 2, EF-1-alpha-2, Elongation factor 1 A-2, eEF1A-2, Statin S1                                                                                                                                                                                                                                                                                                                                                                                      | Nucleus (By similarity).                                                                                 |  |   | 0 |
| Q05682 |    |    |    |   |    |    | 3  |    |    |                                                                                                                                                                                  | Caldesmon, CDM                                                                                                                                                                                                                                                                                                                                                                                                                                                              | Note=On thin filaments in smooth muscle and on stress fibers in fibroblasts (nonmuscle) (By similarity). |  |   | 0 |
| Q06323 | 25 | 17 |    |   | 91 | 55 | 61 | 43 | 71 | 120                                                                                                                                                                              | Proteasome activator complex subunit 1, Proteasome activator 28 subunit alpha, PA28alpha, PA28a, Activator of multicatalytic protease subunit 1, 11S regulator complex subunit alpha, REG-alpha, Interferon gamma up-regulated I-5111 protein, IGUP I-5111                                                                                                                                                                                                                  | Entry not found!                                                                                         |  |   | 0 |
| Q06481 |    |    |    |   |    | 35 |    |    |    | 5                                                                                                                                                                                | Amyloid-like protein 2 precursor, Amyloid protein homolog, APPH, CDEI box-binding protein, CDEBP                                                                                                                                                                                                                                                                                                                                                                            | Cell membrane; Single-pass type I membrane protein (Potential). Nucleus (Potential).                     |  |   | 1 |

## Total Protein Identified

|        |    |    |    |    |    |    |    |    |    |    |                                                                                                                                                                                                                                                                                                     |                                                                                                                                                    |  |   |
|--------|----|----|----|----|----|----|----|----|----|----|-----------------------------------------------------------------------------------------------------------------------------------------------------------------------------------------------------------------------------------------------------------------------------------------------------|----------------------------------------------------------------------------------------------------------------------------------------------------|--|---|
| Q06830 | 15 | 9  |    |    | 53 | 14 | 67 | 24 | 60 | 45 | Peroxiredoxin-1, Thioredoxin peroxidase 2, Thioredoxin-dependent peroxide reductase 2, Proliferation-associated gene protein, PAG, Natural killer cell-enhancing factor A, NKEF-A                                                                                                                   | Cytoplasm. Melanosome. Note=Identified by mass spectrometry in melanosome fractions from stage I to stage IV.                                      |  | 0 |
| Q07020 | 6  | 6  | 27 | 18 | 3  |    |    | 6  | 4  |    | 60S ribosomal protein L18                                                                                                                                                                                                                                                                           | Cytoplasm.                                                                                                                                         |  | 0 |
| Q07021 | 22 | 12 |    | 6  |    | 6  |    | 35 |    | 32 | Complement component 1 Q subcomponent-binding protein, mitochondrial precursor, Glycoprotein gC1qBP, C1qBP, GC1q-R protein, Hyaluronan-binding protein 1, Mitochondrial matrix protein p32, p33                                                                                                     | Mitochondrion matrix.                                                                                                                              |  | 0 |
| Q07812 | 5  | 19 |    |    | 3  |    | 3  | 26 | 22 | 10 | Apoptosis regulator BAX                                                                                                                                                                                                                                                                             | Isoform Alpha: Membrane; Single-pass membrane protein., Isoform Beta: Cytoplasm., Isoform Gamma: Cytoplasm., Isoform Delta: Cytoplasm (Potential). |  | 1 |
| Q07955 | 5  | 7  |    |    |    |    |    |    |    |    | Splicing factor, arginine/serine-rich 1, pre-mRNA-splicing factor SF2, P33 subunit, Alternative-splicing factor 1, ASF-1                                                                                                                                                                            | Cytoplasm. Nucleus speckle. Note=In nuclear speckles. Shuttles between the nucleus and the cytoplasm.                                              |  | 0 |
| Q08211 |    |    | 6  |    |    |    |    |    |    |    | ATP-dependent RNA helicase A, Nuclear DNA helicase II, NDH II, DEAH box protein 9                                                                                                                                                                                                                   | Cytoplasm. Nucleus, nucleolus. Note=Can shuttle between nucleus and cytoplasm.                                                                     |  | 0 |
| Q08945 | 4  |    |    |    |    |    |    |    |    |    | FACT complex subunit SSRP1, Facilitates chromatin transcription complex subunit SSRP1, FACT 80 kDa subunit, FACTp80, Chromatin-specific transcription elongation factor 80 kDa subunit, Structure-specific recognition protein 1, hSSRP1, Recombination signal sequence recognition protein 1, T160 | Nucleus. Note=Colocalizes with RNA polymerase II on chromatin. Recruited to actively transcribed loci.                                             |  | 0 |
| Q12874 |    |    |    |    |    |    |    |    |    | 2  | Splicing factor 3A subunit 3, Spliceosome-associated protein 61, SAP 61, SF3a60                                                                                                                                                                                                                     | Nucleus speckle.                                                                                                                                   |  | 0 |
| Q12905 |    |    | 7  |    |    |    |    |    |    | 6  | Interleukin enhancer-binding factor 2, Nuclear factor of activated T-cells 45 kDa                                                                                                                                                                                                                   | Nucleus, nucleolus.                                                                                                                                |  | 0 |
| Q12906 |    |    |    |    | 8  |    |    |    |    | 8  | Interleukin enhancer-binding factor 3, Nuclear factor of activated T-cells 90 kDa, NF-AT-90, Double-stranded RNA-binding protein 76, DRBP76, Translational control protein 80, TCP80, Nuclear factor associated with dsRNA, NFAR, M-phase phosphoprotein 4, MPP4                                    | Nucleus, nucleolus.                                                                                                                                |  | 0 |
| Q13126 |    |    |    | 17 |    |    | 7  |    |    | 7  | S-methyl-5'-thioadenosine phosphorylase, 5'-methylthioadenosine phosphorylase, MTA phosphorylase, MTAPase                                                                                                                                                                                           | Cytoplasm.                                                                                                                                         |  | 0 |
| Q13162 |    |    |    |    |    |    | 5  |    |    |    | Peroxiredoxin-4, Prx-IV, Thioredoxin peroxidase AO372, Thioredoxin-dependent peroxide reductase A0372, Antioxidant enzyme AOE372, AOE37-2                                                                                                                                                           | Cytoplasm.                                                                                                                                         |  | 0 |
| Q13200 |    |    |    |    | 4  |    |    |    |    |    | 26S proteasome non-ATPase regulatory subunit 2, 26S proteasome regulatory subunit RPN1, 26S proteasome regulatory subunit S2, 26S proteasome subunit p97, Tumor necrosis factor type 1 receptor-associated protein 2, 55.11 protein                                                                 | Entry not found!                                                                                                                                   |  | 0 |
| Q13427 | 6  | 7  |    |    |    |    |    |    |    |    | Peptidyl-prolyl cis-trans isomerase G, Peptidyl-prolyl isomerase G, PPIase G, Rotamase G, Cyclophilin G, Cik-associating RS-cyclophilin, CARS-cyclophilin, CARS-Cyp, SR-cyclophilin, SRcyp, SR-cyp, CASP10                                                                                          | Nucleus matrix. Nucleus speckle. Note=Colocalizes with RNA splicing factors at nuclear speckles.                                                   |  | 0 |
| Q13428 | 16 | 32 | 9  |    |    | 21 |    | 15 |    |    | Treacle protein, Treacher Collins syndrome protein                                                                                                                                                                                                                                                  | Nucleus, nucleolus (Potential).                                                                                                                    |  | 0 |
| Q13509 |    |    |    |    |    |    |    | 8  |    | 10 | Tubulin beta-3 chain, Tubulin beta-III, Tubulin beta-4                                                                                                                                                                                                                                              | Entry not found!                                                                                                                                   |  | 0 |
| Q13523 | 20 | 24 | 8  |    |    |    |    |    |    |    | Serine/threonine-protein kinase PRP4 homolog, PRP4 pre-mRNA-processing factor 4 homolog, PRP4 kinase                                                                                                                                                                                                | Nucleus.                                                                                                                                           |  | 0 |
| Q13561 |    | 4  |    |    | 61 | 15 | 27 | 6  | 61 | 35 | Dynactin subunit 2, Dynactin complex 50 kDa subunit, 50 kDa dynein-associated polypeptide, p50 dynamitin, DCTN-50                                                                                                                                                                                   | Cytoplasm, cytoskeleton. Membrane; Peripheral membrane protein.                                                                                    |  | 0 |

## Total Protein Identified

|        |  |   |    |    |    |   |   |  |    |                                                                                                                                                         |                                                                                                                                                                                                                                                                                                    |                                                                                                                                                         |   |   |
|--------|--|---|----|----|----|---|---|--|----|---------------------------------------------------------------------------------------------------------------------------------------------------------|----------------------------------------------------------------------------------------------------------------------------------------------------------------------------------------------------------------------------------------------------------------------------------------------------|---------------------------------------------------------------------------------------------------------------------------------------------------------|---|---|
| Q13596 |  |   | 4  | 9  |    |   |   |  | 3  | Sorting nexin-1                                                                                                                                         | Endosome membrane; Peripheral membrane protein; Cytoplasmic side. Golgi apparatus, trans-Golgi network membrane; Peripheral membrane protein; Cytoplasmic side (Potential).                                                                                                                        |                                                                                                                                                         | 0 |   |
| Q13813 |  |   | 11 |    | 14 |   | 6 |  | 9  | Spectrin alpha chain, brain, Spectrin, non-erythroid alpha chain, Alpha-II spectrin, Fodrin alpha chain                                                 | Cytoplasm, cytoskeleton. Cytoplasm, cell cortex.                                                                                                                                                                                                                                                   |                                                                                                                                                         | 0 |   |
| Q13838 |  |   |    |    |    |   |   |  | 16 | Spliceosome RNA helicase BAT1, DEAD box protein UAP56, 56 kDa U2AF65-associated protein, ATP-dependent RNA helicase p47, HLA-B-associated transcript-1  | Nucleus.                                                                                                                                                                                                                                                                                           |                                                                                                                                                         | 0 |   |
| Q14019 |  |   |    | 6  |    |   |   |  |    | Coactosin-like protein                                                                                                                                  | Cytoplasm, cytoskeleton (By similarity).                                                                                                                                                                                                                                                           |                                                                                                                                                         | 0 |   |
| Q14103 |  | 4 |    |    | 7  |   |   |  | 9  | Heterogeneous nuclear ribonucleoprotein D0, hnRNP D0, AU-rich element RNA-binding protein 1                                                             | Nucleus. Note=Component of ribonucleosomes.                                                                                                                                                                                                                                                        |                                                                                                                                                         | 0 |   |
| Q14157 |  |   |    |    |    | 2 |   |  |    | Ubiquitin-associated protein 2-like, Protein NICE-4                                                                                                     | Entry not found!                                                                                                                                                                                                                                                                                   |                                                                                                                                                         | 0 |   |
| Q14195 |  |   |    |    |    |   | 2 |  |    | Dihydropyrimidinase-related protein 3, DRP-3, Unc-33-like phosphoprotein, ULIP protein, Collapsin response mediator protein 4, CRMP-4                   | Cytoplasm (By similarity). Cell projection, growth cone (By similarity). Note=Colocalizes with synaptic vesicle protein 2 in the central region of the growth cone (By similarity).                                                                                                                |                                                                                                                                                         | 0 |   |
| Q14204 |  |   | 17 |    |    |   |   |  |    | Cytoplasmic dynein 1 heavy chain 1, Cytoplasmic dynein heavy chain 1, Dynein heavy chain, cytosolic                                                     | Cytoplasm.                                                                                                                                                                                                                                                                                         |                                                                                                                                                         | 0 |   |
| Q14247 |  |   |    |    | 4  |   |   |  |    | Src substrate cortactin, Amplexin, Oncogene EMS1                                                                                                        | Cytoplasm (By similarity). Cell projection, lamellipodium (By similarity). Cell projection, ruffle (By similarity). Note=Associated with membrane ruffles and lamellipodia (By similarity).                                                                                                        |                                                                                                                                                         | 0 |   |
| Q14257 |  |   |    | 22 |    |   |   |  | 3  | Reticulocalbin-2 precursor, Calcium-binding protein ERC-55, E6-binding protein, E6BP                                                                    | Endoplasmic reticulum lumen.                                                                                                                                                                                                                                                                       |                                                                                                                                                         | 0 |   |
| Q14315 |  |   | 3  |    |    |   |   |  | 2  | Filamin-C, Gamma-filamin, Filamin-2, Protein FLNc, Actin-binding-like protein, ABP-L, ABP-280-like protein                                              | Cytoplasm. Membrane; Peripheral membrane protein. Cytoplasm, cytoskeleton. Cytoplasm, myofibril, sarcomere, Z-disk. Note=A small amount localizes at membranes. In striated muscle cells, it predominantly localizes in myofibrillar Z-disks, while a minor fraction localizes with subsarcolemme. |                                                                                                                                                         | 0 |   |
| Q14498 |  |   |    |    | 2  |   |   |  | 10 | RNA-binding protein 39, RNA-binding motif protein 39, RNA-binding region-containing protein 2, Hepatocellular carcinoma protein 1, Splicing factor HCC1 | Nucleus speckle. Note=Concentrated in nuclear speckles. Colocalizes with the core spliceosomal snRNP proteins.                                                                                                                                                                                     |                                                                                                                                                         | 0 |   |
| Q14696 |  |   | 9  | 7  |    |   |   |  |    | Mesoderm development candidate 2, Renal carcinoma antigen NY-REN-61                                                                                     | Entry not found!                                                                                                                                                                                                                                                                                   |                                                                                                                                                         | 0 |   |
| Q14764 |  |   |    | 58 |    |   | 2 |  | 22 | 65                                                                                                                                                      | Major vault protein, MVP, Lung resistance-related protein                                                                                                                                                                                                                                          | Cytoplasm. Nucleus, nuclear pore complex. Note=5% found in the nuclear pore complex. Translocates from the nucleus to the cytoplasm upon EGF treatment. |   | 0 |

## Total Protein Identified

|        |   |    |    |    |   |    |    |   |    |                                                                                                                                                                                                             |                                                                                                                                                                                                                                                                        |  |   |
|--------|---|----|----|----|---|----|----|---|----|-------------------------------------------------------------------------------------------------------------------------------------------------------------------------------------------------------------|------------------------------------------------------------------------------------------------------------------------------------------------------------------------------------------------------------------------------------------------------------------------|--|---|
| Q14974 |   |    | 14 | 13 |   |    |    | 4 |    | Importin subunit beta-1, Karyopherin subunit beta-1, Nuclear factor P97, Importin 90                                                                                                                        | Cytoplasm. Nucleus envelope.                                                                                                                                                                                                                                           |  | 0 |
| Q14993 |   |    | 25 | 9  |   |    |    |   |    | Collagen alpha-1(XIX) chain precursor, Collagen alpha-1(Y) chain                                                                                                                                            | Secreted, extracellular space, extracellular matrix (By similarity).                                                                                                                                                                                                   |  | 0 |
| Q15056 |   |    |    |    | 3 |    |    |   |    | Eukaryotic translation initiation factor 4H, eIF-4H, Williams-Beuren syndrome chromosomal region 1 protein                                                                                                  | Cytoplasm, perinuclear region (By similarity).                                                                                                                                                                                                                         |  | 0 |
| Q15059 |   | 3  |    |    |   |    |    |   |    | Bromodomain-containing protein 3, RING3-like protein                                                                                                                                                        | Nucleus (Potential).                                                                                                                                                                                                                                                   |  | 0 |
| Q15181 | 6 | 13 |    |    |   |    | 5  | 2 | 12 | Inorganic pyrophosphatase, Pyrophosphate phosphohydrolase, PPase                                                                                                                                            | Cytoplasm (By similarity).                                                                                                                                                                                                                                             |  | 0 |
| Q15233 |   |    |    | 10 | 4 |    |    | 8 | 22 | Non-POU domain-containing octamer-binding protein, NonO protein, 54 kDa nuclear RNA- and DNA-binding protein, p54(nrb), p54nrb, 55 kDa nuclear protein, NMT55, DNA-binding p52/p100 complex, 52 kDa subunit | Nucleus.                                                                                                                                                                                                                                                               |  | 0 |
| Q15287 | 7 | 3  |    |    |   |    |    |   |    | RNA-binding protein with serine-rich domain 1, SR-related protein LDC2                                                                                                                                      | Nucleus speckle. Cytoplasm. Note=Nucleocytoplasmic shuttling protein.                                                                                                                                                                                                  |  | 0 |
| Q15363 |   |    |    |    |   |    |    |   | 19 | Transmembrane emp24 domain-containing protein 2 precursor, Membrane protein p24A                                                                                                                            | Cytoplasmic vesicle membrane; Single-pass type I membrane protein. Cytoplasmic vesicle, COPI-coated vesicle membrane; Single-pass type I membrane protein. Golgi apparatus membrane; Single-pass type I membrane protein. Note=Golgi-derived coatamer-coated vesicles. |  | 1 |
| Q15365 |   |    |    | 9  |   |    | 23 |   |    | Poly(rC)-binding protein 1, Alpha-CP1, hnRNP-E1, Nucleic acid-binding protein SUB2.3                                                                                                                        | Nucleus. Cytoplasm. Note=Loosely bound in the nucleus. May shuttle between the nucleus and the cytoplasm.                                                                                                                                                              |  | 0 |
| Q15366 |   |    |    |    |   |    | 10 |   |    | Poly(rC)-binding protein 2, Alpha-CP2, hnRNP-E2                                                                                                                                                             | Nucleus. Cytoplasm. Note=Loosely bound in the nucleus. May shuttle between the nucleus and the cytoplasm.                                                                                                                                                              |  | 0 |
| Q15417 |   |    |    | 14 |   | 7  |    | 8 | 14 | Calponin-3, Calponin, acidic isoform                                                                                                                                                                        | Entry not found!                                                                                                                                                                                                                                                       |  | 0 |
| Q15459 |   |    |    |    |   |    |    |   | 40 | Splicing factor 3 subunit 1, Spliceosome-associated protein 114, SAP 114, SF3a120                                                                                                                           | Nucleus (By similarity).                                                                                                                                                                                                                                               |  | 0 |
| Q15582 |   |    |    |    |   | 12 |    | 7 |    | Transforming growth factor-beta-induced protein ig-h3 precursor, Beta ig-h3, Kerato-epithelin, RGD-containing collagen-associated protein, RGD-CAP                                                          | Secreted, extracellular space, extracellular matrix. Note=May be associated both with microfibrils and with the cell surface.                                                                                                                                          |  | 0 |
| Q15631 |   |    |    | 7  |   |    |    |   |    | Translin                                                                                                                                                                                                    | Cytoplasm. Nucleus.                                                                                                                                                                                                                                                    |  | 0 |
| Q15637 | 2 |    |    |    |   |    |    |   |    | Splicing factor 1, Zinc finger protein 162, Transcription factor ZFM1, Zinc finger gene in MEN1 locus, Mammalian branch point-binding protein mBBP, BBP                                                     | Nucleus.                                                                                                                                                                                                                                                               |  | 0 |
| Q15907 |   |    |    |    | 6 |    |    |   |    | Ras-related protein Rab-11B, GTP-binding protein YPT3                                                                                                                                                       | Cell membrane; Lipid-anchor; Cytoplasmic side (Potential).                                                                                                                                                                                                             |  | 0 |
| Q16555 |   |    |    | 2  |   |    |    |   |    | Dihydropyrimidinase-related protein 2, DRP-2, Collapsin response mediator protein 2, CRMP-2, N2A3                                                                                                           | Cytoplasm (By similarity).                                                                                                                                                                                                                                             |  | 0 |
| Q16629 |   | 7  |    |    |   |    |    |   |    | Splicing factor, arginine/serine-rich 7, Splicing factor 9G8                                                                                                                                                | Nucleus.                                                                                                                                                                                                                                                               |  | 0 |
| Q16658 |   |    | 4  | 5  |   |    |    |   |    | Fascin, Singed-like protein, 55 kDa actin-bundling protein, p55                                                                                                                                             | Entry not found!                                                                                                                                                                                                                                                       |  | 0 |
| Q16698 |   |    |    |    | 3 |    |    |   |    | 2,4-dienoyl-CoA reductase, mitochondrial precursor, 2,4-dienoyl-CoA reductase [NADPH], 4-enoyl-CoA reductase [NADPH]                                                                                        | Mitochondrion.                                                                                                                                                                                                                                                         |  | 0 |



## Total Protein Identified

|        |    |    |    |  |  |    |    |    |    |    |                                                                                                                                                                                        |                                                                                                                                                                                                                                                                                                                                                                                                                                                                                                                    |                                  |   |   |
|--------|----|----|----|--|--|----|----|----|----|----|----------------------------------------------------------------------------------------------------------------------------------------------------------------------------------------|--------------------------------------------------------------------------------------------------------------------------------------------------------------------------------------------------------------------------------------------------------------------------------------------------------------------------------------------------------------------------------------------------------------------------------------------------------------------------------------------------------------------|----------------------------------|---|---|
| Q16881 | 16 | 5  | 12 |  |  | 33 | 8  |    |    | 3  | Thioredoxin reductase 1, cytoplasmic, TR, Thioredoxin reductase TR1, KM-102-derived reductase-like factor, Gene associated with retinoid-IFN-induced mortality 12 protein, GRIM-12     | Cytoplasm (By similarity)., Isoform 4: Cytoplasm. Nucleus., Isoform 5: Cytoplasm.                                                                                                                                                                                                                                                                                                                                                                                                                                  |                                  | 0 |   |
| Q16891 |    |    |    |  |  |    |    |    |    | 15 | Mitochondrial inner membrane protein, Mitofilin, p87/89, Cell proliferation-inducing gene 4 protein                                                                                    | Mitochondrion inner membrane.                                                                                                                                                                                                                                                                                                                                                                                                                                                                                      |                                  | 1 |   |
| Q4VC31 | 2  |    |    |  |  |    |    |    |    |    | Coiled-coil domain-containing protein 58                                                                                                                                               | Entry not found!                                                                                                                                                                                                                                                                                                                                                                                                                                                                                                   |                                  | 0 |   |
| Q6NZI2 |    |    |    |  |  | 7  |    |    |    | 9  | Polymerase I and transcript release factor                                                                                                                                             | Cell membrane, caveola. Cell membrane. Microsome. Cytoplasm, cytosol. Mitochondrion. Nucleus. Note=Found at the surface of the caveolae. Also found in the plasma membrane, microsomal and cytosolic fractions and at a low level in the mitochondrial and nuclear fractions. Translocates to the cytoplasm from the caveolae upon insulin stimulation.                                                                                                                                                            |                                  | 0 |   |
| Q71U36 |    | 6  |    |  |  |    |    |    |    |    | Tubulin alpha-1A chain, Tubulin B-alpha-1, Tubulin alpha-3 chain, Alpha-tubulin 3                                                                                                      | Entry not found!                                                                                                                                                                                                                                                                                                                                                                                                                                                                                                   |                                  | 0 |   |
| Q71UI9 | 15 | 41 | 88 |  |  |    |    | 67 |    | 71 | Histone H2AV, H2A.F/Z                                                                                                                                                                  | Nucleus (By similarity).                                                                                                                                                                                                                                                                                                                                                                                                                                                                                           |                                  | 0 |   |
| Q71UM5 |    |    |    |  |  | 5  |    |    |    |    | 40S ribosomal protein S27-like protein                                                                                                                                                 | Entry not found!                                                                                                                                                                                                                                                                                                                                                                                                                                                                                                   |                                  | 0 |   |
| Q7Z6E9 | 4  | 10 |    |  |  |    |    |    |    |    | Retinoblastoma-binding protein 6, p53-associated cellular protein of testis, Proliferation potential-related protein, Protein P2P-R, Retinoblastoma-binding Q protein 1, Protein RBQ-1 | Nucleus, nucleolus. Note=Colocalizes with mitotic chromosomes.                                                                                                                                                                                                                                                                                                                                                                                                                                                     |                                  | 0 |   |
| Q7Z6Z7 |    | 3  |    |  |  |    |    |    |    |    | E3 ubiquitin-protein ligase HUWE1, HECT, UBA and WWE domain-containing protein 1, URE-B1, Mcl-1 ubiquitin ligase E3, Mule, ARF-binding protein 1, ARF-BP1                              | Nucleus (By similarity). Note=Predominantly cytosolic or perinuclear in some colorectal carcinoma cells.                                                                                                                                                                                                                                                                                                                                                                                                           |                                  | 0 |   |
| Q86UE4 | 4  |    |    |  |  |    |    |    |    |    | Protein LYRIC, Lysine-rich CEACAM1 co-isolated protein, 3D3/LYRIC, Metastasis adhesion protein, Metadherin, Astrocyte elevated gene-1 protein, AEG-1                                   | Endoplasmic reticulum membrane; Single-pass type II membrane protein (By similarity). Nucleus membrane; Single-pass type II membrane protein (By similarity). Cell junction, tight junction; Single-pass type II membrane protein (By similarity). Nucleus, nucleolus (By similarity). Note=In epithelial cells, recruited to tight junctions (TJ) during the maturation of the TJ complexes. A nucleolar staining may be due to nuclear targeting of an isoform lacking the transmembrane domain (By similarity). |                                  | 1 |   |
| Q86V81 | 3  | 4  |    |  |  |    |    |    |    |    | THO complex subunit 4, Tho4, Ally of AML-1 and LEF-1, Transcriptional coactivator Aly/REF, bZIP-enhancing factor BEF                                                                   | Nucleus. Cytoplasm. Note=Travels to the cytoplasm as part of the exon junction complex (EJC) bound to mRNA.                                                                                                                                                                                                                                                                                                                                                                                                        |                                  | 0 |   |
| Q8IUE6 |    |    | 22 |  |  |    |    |    |    |    | Histone H2A type 2-B                                                                                                                                                                   | Nucleus.                                                                                                                                                                                                                                                                                                                                                                                                                                                                                                           |                                  | 0 |   |
| Q8IYB3 | 60 | 84 | 55 |  |  | 3  | 51 |    | 64 | 10 | 51                                                                                                                                                                                     | Serine/arginine repetitive matrix protein 1, Ser/Arg-related nuclear matrix protein, SR-related nuclear matrix protein of 160 kDa, SRm160                                                                                                                                                                                                                                                                                                                                                                          | Nucleus matrix. Nucleus speckle. |   | 0 |

## Total Protein Identified

|        |    |   |    |    |   |     |    |    |    |                                                                                                                                               |                                                                                                                                                                                                                                                                                                                                                                                                                                                                                       |  |    |
|--------|----|---|----|----|---|-----|----|----|----|-----------------------------------------------------------------------------------------------------------------------------------------------|---------------------------------------------------------------------------------------------------------------------------------------------------------------------------------------------------------------------------------------------------------------------------------------------------------------------------------------------------------------------------------------------------------------------------------------------------------------------------------------|--|----|
| Q8N8S7 |    |   |    |    |   |     | 5  |    |    | Protein enabled homolog                                                                                                                       | Cytoplasm. Cytoplasm, cytoskeleton (By similarity). Cell projection, lamellipodium (By similarity). Cell projection, filopodium (By similarity). Cell junction, synapse (By similarity). Note=Targeted to the leading edge of lamellipodia and filopodia by MRL family members. Colocalizes at filopodial tips with a number of other proteins including vinculin and zyxlin. Colocalizes with N-WASP at the leading edge. Colocalizes with GPHN and PFN at synapses (By similarity). |  | 0  |
| Q8NBS9 | 5  | 4 | 71 | 21 |   | 31  | 15 | 16 | 39 | Thioredoxin domain-containing protein 5 precursor, Thioredoxin-like protein p46, Endoplasmic reticulum protein ERp46                          | Endoplasmic reticulum lumen (By similarity).                                                                                                                                                                                                                                                                                                                                                                                                                                          |  | 0  |
| Q8NBX0 |    |   | 37 |    |   | 5   |    | 59 | 42 | Probable saccharopine dehydrogenase                                                                                                           | Entry not found!                                                                                                                                                                                                                                                                                                                                                                                                                                                                      |  | 0  |
| Q8TDN6 | 11 | 5 |    |    |   |     |    |    |    | Brix domain-containing protein 2, Ribosome biogenesis protein Brix                                                                            | Nucleus, nucleolus.                                                                                                                                                                                                                                                                                                                                                                                                                                                                   |  | 0  |
| Q8TEA8 | 6  |   |    |    |   |     |    |    | 7  | D-tyrosyl-tRNA(Tyr) deacylase 1, Histidyl-tRNA synthetase-related                                                                             | Cytoplasm (Potential).                                                                                                                                                                                                                                                                                                                                                                                                                                                                |  | 0  |
| Q8WUM4 |    |   |    |    |   |     | 4  |    |    | Programmed cell death 6-interacting protein, PDCD6-interacting protein, ALG-2-interacting protein 1, Hp95                                     | Cytoplasm, cytosol. Melanosome. Note=Identified by mass spectrometry in melanosome fractions from stage I to stage IV.                                                                                                                                                                                                                                                                                                                                                                |  | 0  |
| Q8WWI5 | 5  |   |    |    |   |     |    |    |    | Choline transporter-like protein 1, Solute carrier family 44 member 1, CD92 antigen, CDw92                                                    | Membrane; Multi-pass membrane protein (By similarity).                                                                                                                                                                                                                                                                                                                                                                                                                                |  | 10 |
| Q8WXA9 |    | 3 |    |    |   |     |    |    |    | Splicing factor, arginine/serine-rich 12, Serine-arginine-rich-splicing regulatory protein 86, SRp86, Splicing regulatory protein 508, SRp508 | Nucleus.                                                                                                                                                                                                                                                                                                                                                                                                                                                                              |  | 0  |
| Q8WZ42 |    |   |    | 8  |   | 7   |    |    |    | Titin, Connectin, Rhabdomyosarcoma antigen MU-RMS-40.14                                                                                       | Cytoplasm (Probable). Nucleus.                                                                                                                                                                                                                                                                                                                                                                                                                                                        |  | 0  |
| Q92520 |    |   |    |    | 3 | 3   |    |    | 25 | Protein FAM3C precursor                                                                                                                       | Secreted (Potential).                                                                                                                                                                                                                                                                                                                                                                                                                                                                 |  | 0  |
| Q92522 | 5  |   |    |    |   |     |    |    |    | Histone H1x                                                                                                                                   | Nucleus.                                                                                                                                                                                                                                                                                                                                                                                                                                                                              |  | 0  |
| Q92688 |    |   |    |    |   |     |    |    | 13 | Acidic leucine-rich nuclear phosphoprotein 32 family member B, Acidic protein rich in leucines, PHAPI2, Silver-stainable protein SSP29        | Nucleus. Note=Accumulates in the nuclei at the S phase (By similarity).                                                                                                                                                                                                                                                                                                                                                                                                               |  | 0  |
| Q93079 |    |   |    |    |   | 503 |    |    |    | Histone H2B type 1-H, H2B.j, H2B/j                                                                                                            | Nucleus.                                                                                                                                                                                                                                                                                                                                                                                                                                                                              |  | 0  |
| Q969H8 |    | 5 | 6  |    |   | 10  | 11 |    |    | UPF0556 protein C19orf10 precursor, Stromal cell-derived growth factor SF20, Interleukin-25, IL-25                                            | Secreted (By similarity).                                                                                                                                                                                                                                                                                                                                                                                                                                                             |  | 0  |
| Q96AG4 |    |   | 3  |    | 6 |     |    |    | 24 | Leucine-rich repeat-containing protein 59                                                                                                     | Microsome membrane; Single-pass type II membrane protein (By similarity).                                                                                                                                                                                                                                                                                                                                                                                                             |  | 1  |
| Q96C90 |    |   |    |    |   |     | 6  |    |    | Protein phosphatase 1 regulatory subunit 14B, Phospholipase C beta 3 neighbouring gene protein                                                | Cytoplasm (Probable).                                                                                                                                                                                                                                                                                                                                                                                                                                                                 |  | 0  |
| Q96FQ6 |    |   |    |    |   |     |    | 17 |    | Protein S100-A16, S100 calcium-binding protein A16, Protein S100F, Aging-associated gene 13 protein                                           | Entry not found!                                                                                                                                                                                                                                                                                                                                                                                                                                                                      |  | 0  |
| Q96HR9 | 5  | 5 |    |    |   |     |    |    |    | Receptor expression-enhancing protein 6, Polyposis locus protein 1-like 1                                                                     | Membrane; Multi-pass membrane protein (By similarity).                                                                                                                                                                                                                                                                                                                                                                                                                                |  | 2  |
| Q96KP4 |    |   |    | 5  |   | 7   |    |    |    | Cytosolic non-specific dipeptidase, CNDP dipeptidase 2, Glutamate carboxypeptidase-like protein 1, Peptidase A                                | Entry not found!                                                                                                                                                                                                                                                                                                                                                                                                                                                                      |  | 0  |
| Q96PK2 |    |   |    |    |   |     |    |    | 3  | Microtubule-actin cross-linking factor 1, isoform 4                                                                                           | Cytoplasm, cytoskeleton (By similarity).                                                                                                                                                                                                                                                                                                                                                                                                                                              |  | 0  |
| Q96QV6 | 9  |   |    |    |   | 13  |    |    |    | Histone H2A type 1-A, H2A/r                                                                                                                   | Nucleus.                                                                                                                                                                                                                                                                                                                                                                                                                                                                              |  | 0  |

## Total Protein Identified

|        |    |    |    |     |    |   |    |  |    |    |                                                                                                                                                                                                                                                                    |                                                                                                                                                                                                    |                                                                                                                                                                                                                                                    |   |   |
|--------|----|----|----|-----|----|---|----|--|----|----|--------------------------------------------------------------------------------------------------------------------------------------------------------------------------------------------------------------------------------------------------------------------|----------------------------------------------------------------------------------------------------------------------------------------------------------------------------------------------------|----------------------------------------------------------------------------------------------------------------------------------------------------------------------------------------------------------------------------------------------------|---|---|
| Q96TA1 |    |    |    |     | 5  |   |    |  |    |    | Niban-like protein 1, Protein FAM129B, Meg-3                                                                                                                                                                                                                       | Entry not found!                                                                                                                                                                                   |                                                                                                                                                                                                                                                    | 0 |   |
| Q99417 |    |    |    |     | 7  |   |    |  |    |    | C-Myc-binding protein, Associate of Myc 1, AMY-1                                                                                                                                                                                                                   | Cytoplasm. Nucleus. Mitochondrion. Note=Translocates into the nucleus in the S phase of the cell cycle upon an increase of c-Myc expression. Found in the mitochondria when associated with AKAP1. |                                                                                                                                                                                                                                                    | 0 |   |
| Q99439 |    |    |    |     |    |   | 3  |  |    |    | Calponin-2, Calponin H2, smooth muscle, Neutral calponin                                                                                                                                                                                                           | Entry not found!                                                                                                                                                                                   |                                                                                                                                                                                                                                                    | 0 |   |
| Q99471 |    |    |    |     |    |   | 12 |  |    |    | Prefoldin subunit 5, C-myc-binding protein Mm-1, Myc modulator 1                                                                                                                                                                                                   | Entry not found!                                                                                                                                                                                   |                                                                                                                                                                                                                                                    | 0 |   |
| Q99497 |    | 4  |    | 13  | 4  |   |    |  |    |    | Protein DJ-1, Oncogene DJ1, Parkinson disease protein 7                                                                                                                                                                                                            | Nucleus. Cytoplasm. Note=Associated with mitochondria in some cells, particularly after oxidative stress. Detected in tau inclusions in brains from neurodegenerative disease patients.            |                                                                                                                                                                                                                                                    | 0 |   |
| Q99536 |    |    | 23 | 111 | 11 |   | 16 |  | 52 | 94 | Synaptic vesicle membrane VAT-1 homolog                                                                                                                                                                                                                            | Entry not found!                                                                                                                                                                                   |                                                                                                                                                                                                                                                    | 0 |   |
| Q99714 |    |    |    |     |    |   |    |  |    | 2  | 3-hydroxyacyl-CoA dehydrogenase type-2, 3-hydroxyacyl-CoA dehydrogenase type II, Type II HADH, 3-hydroxy-2-methylbutyryl-CoA dehydrogenase, Endoplasmic reticulum-associated amyloid beta-peptide-binding protein, Short-chain type dehydrogenase/reductase XH98G2 | Entry not found!                                                                                                                                                                                   |                                                                                                                                                                                                                                                    | 0 |   |
| Q99733 |    |    |    | 9   | 3  |   |    |  |    | 17 | Nucleosome assembly protein 1-like 4, Nucleosome assembly protein 2, NAP2                                                                                                                                                                                          | Nucleus.                                                                                                                                                                                           |                                                                                                                                                                                                                                                    | 0 |   |
| Q99757 | 7  |    |    |     |    |   | 3  |  |    |    | Thioredoxin, mitochondrial precursor, Mt-Trx, MTRX, Thioredoxin-2                                                                                                                                                                                                  | Mitochondrion.                                                                                                                                                                                     |                                                                                                                                                                                                                                                    | 0 |   |
| Q99832 |    |    |    |     | 8  |   |    |  |    |    | T-complex protein 1 subunit eta, TCP-1-eta, CCT-eta, HIV-1 Nef-interacting protein                                                                                                                                                                                 | Cytoplasm (By similarity).                                                                                                                                                                         |                                                                                                                                                                                                                                                    | 0 |   |
| Q9BS26 | 10 | 26 |    | 19  |    | 4 |    |  |    | 6  | 52                                                                                                                                                                                                                                                                 | Thioredoxin domain-containing protein 4 precursor, Endoplasmic reticulum resident protein ERp44                                                                                                    | Endoplasmic reticulum lumen.                                                                                                                                                                                                                       |   | 0 |
| Q9BUL8 | 13 | 4  |    |     | 8  |   | 4  |  |    |    |                                                                                                                                                                                                                                                                    | Programmed cell death protein 10, TF-1 cell apoptosis-related protein 15, Cerebral cavernous malformations 3 protein                                                                               | Entry not found!                                                                                                                                                                                                                                   |   | 0 |
| Q9BWD1 |    |    | 3  |     |    |   |    |  |    |    |                                                                                                                                                                                                                                                                    | Acetyl-CoA acetyltransferase, cytosolic, Cytosolic acetoacetyl-CoA thiolase, Acetyl-CoA transferase-like protein                                                                                   | Cytoplasm.                                                                                                                                                                                                                                         |   | 0 |
| Q9H0U4 |    |    |    |     | 4  |   |    |  |    |    |                                                                                                                                                                                                                                                                    | Ras-related protein Rab-1B                                                                                                                                                                         | Cell membrane; Lipid-anchor; Cytoplasmic side (Potential).                                                                                                                                                                                         |   | 0 |
| Q9H5Y7 |    | 9  |    |     |    |   |    |  |    |    |                                                                                                                                                                                                                                                                    | SLIT and NTRK-like protein 6 precursor                                                                                                                                                             | Membrane; Single-pass type I membrane protein (Potential).                                                                                                                                                                                         |   | 1 |
| Q9H7B2 | 2  |    |    |     |    |   |    |  |    |    |                                                                                                                                                                                                                                                                    | Brix domain-containing protein 1                                                                                                                                                                   | Nucleus, nucleolus.                                                                                                                                                                                                                                |   | 0 |
| Q9HB71 |    |    | 5  |     |    |   |    |  |    |    | 11                                                                                                                                                                                                                                                                 | Calcyclin-binding protein, CacyBP, hCacyBP, Siah-interacting protein, S100A6-binding protein                                                                                                       | Nucleus. Cytoplasm. Note=Cytoplasmic at low calcium concentrations. In neuroblastoma cells, after a retinoic acid (RA) induction and calcium increase, it localizes in both the nucleus and cytoplasm. The nuclear fraction may be phosphorylated. |   | 0 |

## Total Protein Identified

|        |    |    |    |    |    |    |    |    |     |                                                                                                                                                                                                                            |                                                                                                                                                                                                                                                                                                                                             |                  |   |   |
|--------|----|----|----|----|----|----|----|----|-----|----------------------------------------------------------------------------------------------------------------------------------------------------------------------------------------------------------------------------|---------------------------------------------------------------------------------------------------------------------------------------------------------------------------------------------------------------------------------------------------------------------------------------------------------------------------------------------|------------------|---|---|
| Q9NQC3 |    |    | 8  |    | 6  | 8  | 21 | 6  | 154 | Reticulon-4, Neurite outgrowth inhibitor, Nogo protein, Foccen, Neuroendocrine-specific protein, NSP, Neuroendocrine-specific protein C homolog, RTN-x, Reticulon-5                                                        | Endoplasmic reticulum membrane; Multi-pass membrane protein. Note=Anchored to the membrane of the endoplasmic reticulum through 2 putative transmembrane domains.                                                                                                                                                                           |                  | 2 |   |
| Q9NS69 |    |    |    |    |    |    |    |    | 18  | Mitochondrial import receptor subunit TOM22 homolog, Translocase of outer membrane 22 kDa subunit homolog, hTom22, 1C9-2                                                                                                   | Mitochondrion outer membrane; Single-pass membrane protein (By similarity).                                                                                                                                                                                                                                                                 |                  | 1 |   |
| Q9NTK5 |    |    | 4  |    |    |    |    |    |     | Obg-like ATPase 1, GTP-binding protein 9                                                                                                                                                                                   | Entry not found!                                                                                                                                                                                                                                                                                                                            |                  | 0 |   |
| Q9NVD7 |    |    |    | 4  | 4  |    | 3  |    |     | Alpha-parvin, Calponin-like integrin-linked kinase-binding protein, CH-ILKBP, Matrix-remodeling-associated protein 2, Actopaxin                                                                                            | Cell junction, focal adhesion; Cytoplasmic side. Note=Constituent of focal adhesions.                                                                                                                                                                                                                                                       |                  | 0 |   |
| Q9NX58 | 43 | 25 |    |    |    |    |    |    |     | Cell growth-regulating nucleolar protein                                                                                                                                                                                   | Nucleus, nucleolus.                                                                                                                                                                                                                                                                                                                         |                  | 0 |   |
| Q9NXG2 | 4  |    |    |    |    |    |    |    |     | THUMP domain-containing protein 1                                                                                                                                                                                          | Entry not found!                                                                                                                                                                                                                                                                                                                            |                  | 0 |   |
| Q9NYI0 |    |    |    | 5  |    |    |    |    |     | PH and SEC7 domain-containing protein 3, Pleckstrin homology and SEC7 domain-containing protein 3, Exchange factor for ADP-ribosylation factor guanine nucleotide factor 6, Hepatocellular carcinoma-associated antigen 67 | Cell junction, synapse, postsynaptic cell membrane, postsynaptic density (By similarity).                                                                                                                                                                                                                                                   |                  | 0 |   |
| Q9NYL9 |    |    |    |    |    |    | 7  |    | 7   | Tropomodulin-3, Ubiquitous tropomodulin, U-Tmod                                                                                                                                                                            | Entry not found!                                                                                                                                                                                                                                                                                                                            |                  | 0 |   |
| Q9POL0 |    |    |    |    | 10 |    |    |    |     | Vesicle-associated membrane protein-associated protein A, VAMP-associated protein A, VAMP-A, VAP-A, 33 kDa Vamp associated protein, VAP-33                                                                                 | Cell membrane; Single-pass type IV membrane protein. Intracytoplasmic membrane; Single-pass type IV membrane protein. Note=Present in the plasma membrane and in intracellular vesicles, together with SNARE proteins. May also associate with the cytoskeleton. Colocalizes with OCLN at the tight junction in polarized epithelial cells. |                  | 1 |   |
| Q9P2E9 | 3  | 5  |    | 5  | 16 | 14 |    |    |     | Ribosome-binding protein 1, Ribosome receptor protein, 180 kDa ribosome receptor homolog, ES/130-related protein                                                                                                           | Endoplasmic reticulum membrane; Single-pass type III membrane protein (By similarity).                                                                                                                                                                                                                                                      |                  | 1 |   |
| Q9UBE0 |    |    |    |    |    |    |    |    | 7   | SUMO-activating enzyme subunit 1, Ubiquitin-like 1-activating enzyme E1A                                                                                                                                                   | Nucleus.                                                                                                                                                                                                                                                                                                                                    |                  | 0 |   |
| Q9UBP6 |    |    | 17 | 13 |    | 11 |    |    |     | tRNA (guanine-N(7)-)-methyltransferase, tRNA(m7G46)-methyltransferase, Methyltransferase-like protein 1                                                                                                                    | Entry not found!                                                                                                                                                                                                                                                                                                                            |                  | 0 |   |
| Q9UBQ5 |    |    |    | 2  |    |    |    |    |     | Eukaryotic translation initiation factor 3 subunit K, Eukaryotic translation initiation factor 3 subunit 12, eIF-3 p25, eIF-3 p28, eIF3k, Muscle-specific gene M9 protein, PLAC-24                                         | Nucleus. Cytoplasm.                                                                                                                                                                                                                                                                                                                         |                  | 0 |   |
| Q9UHV9 |    |    |    |    |    | 32 |    |    |     | Prefoldin subunit 2                                                                                                                                                                                                        | Entry not found!                                                                                                                                                                                                                                                                                                                            |                  | 0 |   |
| Q9UIJ7 |    |    |    |    |    | 5  | 19 |    |     | GTP:AMP phosphotransferase mitochondrial, Adenylate kinase 3, AK3, Adenylate kinase 3 alpha-like 1                                                                                                                         | Mitochondrion matrix (By similarity).                                                                                                                                                                                                                                                                                                       |                  | 0 |   |
| Q9UJZ1 |    |    |    |    |    |    |    |    | 41  | Stomatin-like protein 2, SLP-2, EPB72-like 2                                                                                                                                                                               | Membrane; Peripheral membrane protein. Cytoplasm. Cytoplasm, cytoskeleton. Note=Associated with the cytoskeleton.                                                                                                                                                                                                                           |                  | 0 |   |
| Q9UL46 | 21 | 28 | 6  |    | 54 | 40 | 10 | 24 | 10  | 72                                                                                                                                                                                                                         | Proteasome activator complex subunit 2, Proteasome activator 28 subunit beta, PA28beta, PA28b, Activator of multicatalytic protease subunit 2, 11S regulator complex subunit beta, REG-beta                                                                                                                                                 | Entry not found! |   | 0 |

## Total Protein Identified

|        |    |    |    |    |    |    |    |    |    |    |                                                                                                                                    |                                                                                                                                                                                                                                                                                                                |  |   |
|--------|----|----|----|----|----|----|----|----|----|----|------------------------------------------------------------------------------------------------------------------------------------|----------------------------------------------------------------------------------------------------------------------------------------------------------------------------------------------------------------------------------------------------------------------------------------------------------------|--|---|
| Q9UMX5 |    |    | 22 |    |    | 3  | 11 |    |    | 22 | Neudesin precursor, Neuron-derived neurotrophic factor, Secreted protein of unknown function, SPUF protein                         | Secreted, extracellular space (By similarity).                                                                                                                                                                                                                                                                 |  | 0 |
| Q9UNZ2 |    |    |    |    |    | 3  |    |    |    |    | NSFL1 cofactor p47, p97 cofactor p47                                                                                               | Nucleus (By similarity). Golgi apparatus, Golgi stack (By similarity). Note=Predominantly nuclear in interphase cells. Bound to the axial elements of sex chromosomes in pachytene spermatocytes. A small proportion of the protein is cytoplasmic, associated with Golgi stacks (By similarity).              |  | 0 |
| Q9UPQ9 |    |    | 2  |    |    |    |    |    |    |    | Trinucleotide repeat-containing gene 6B protein                                                                                    | Entry not found!                                                                                                                                                                                                                                                                                               |  | 0 |
| Q9UPT8 |    | 2  |    |    |    |    |    |    |    |    | Zinc finger CCCH domain-containing protein 4                                                                                       | Entry not found!                                                                                                                                                                                                                                                                                               |  | 0 |
| Q9UQ80 |    |    |    |    |    | 3  |    |    |    |    | Proliferation-associated protein 2G4, Cell cycle protein p38-2G4 homolog, hG4-1, ErbB3-binding protein 1                           | Cytoplasm. Nucleus, nucleolus. Note=Tranlocates to the nucleus upon treatment with HRG.                                                                                                                                                                                                                        |  | 0 |
| Q9Y224 | 4  |    | 6  | 27 | 36 |    | 14 |    | 24 | 73 | UPF0568 protein C14orf166                                                                                                          | Nucleus. Cytoplasm, perinuclear region. Note=May localize at the centrosome during mitosis.                                                                                                                                                                                                                    |  | 0 |
| Q9Y2B0 | 22 | 22 | 48 | 14 | 26 | 63 | 56 | 20 |    | 13 | Protein canopy homolog 2 precursor, MIR-interacting saposin-like protein, Transmembrane protein 4, Putative secreted protein ZSIG9 | Endoplasmic reticulum (Potential).                                                                                                                                                                                                                                                                             |  | 0 |
| Q9Y2T3 | 5  |    |    |    |    |    |    |    |    |    | Guanine deaminase, Guanase, Guanine aminase, Guanine aminohydrolase, GAH, p51-nedasin                                              | Entry not found!                                                                                                                                                                                                                                                                                               |  | 0 |
| Q9Y383 |    |    |    |    | 5  |    |    |    |    | 25 | Putative RNA-binding protein Luc7-like 2                                                                                           | Entry not found!                                                                                                                                                                                                                                                                                               |  | 0 |
| Q9Y3R0 |    |    |    |    |    |    |    | 2  |    |    | Glutamate receptor-interacting protein 1, GRIP1 protein                                                                            | Cytoplasmic vesicle. Endoplasmic reticulum. Cell junction, synapse, postsynaptic cell membrane (By similarity). Note=Cytoplasmic and membrane-associated with vesicles, peri-Golgi complexes and endoplasmic reticulum. Enriched in post-synaptic plasma membrane and post-synaptic densities (By similarity). |  | 0 |
| Q9Y490 |    |    |    |    | 11 | 4  | 13 | 6  | 3  | 18 | Talin-1                                                                                                                            | Cell projection, ruffle membrane (By similarity). Note=Colocalizes with LAYN at the membrane ruffles (By similarity).                                                                                                                                                                                          |  | 0 |
| Q9Y4F1 |    |    |    | 2  |    |    |    |    |    |    | FERM, RhoGEF and pleckstrin domain-containing protein 1, Chondrocyte-derived ezrin-like protein                                    | Entry not found!                                                                                                                                                                                                                                                                                               |  | 0 |
| Q9Y5X3 |    |    |    | 9  | 3  |    |    |    |    |    | Sorting nexin-5                                                                                                                    | Entry not found!                                                                                                                                                                                                                                                                                               |  | 0 |
| Q9Y625 |    |    | 8  | 14 |    | 21 |    | 4  | 5  | 85 | Glypican-6 precursor                                                                                                               | Cell membrane; Lipid-anchor, GPI-anchor; Extracellular side (By similarity)., Secreted glypican-6; Secreted, extracellular space (By similarity).                                                                                                                                                              |  | 0 |
| Q9Y696 |    |    |    | 7  |    |    | 3  |    | 3  | 8  | Chloride intracellular channel protein 4, Intracellular chloride ion channel protein p64H1                                         | Cytoplasmic vesicle. Note=Present in an intracellular vesicular compartment that likely represent trans-Golgi network vesicles. Present in both, soluble and membrane fractions.                                                                                                                               |  | 0 |
