# Supplementary material
Source: PubMed Central journal article supplement (PMC2735218)
Supplement: NIHMS132564-supplement-5_si_005.pdf [file NIHMS132564-supplement-5_si_005.pdf]

**Proteins Identified and Their Sequence Coverage in TPC-1 Cell Line**

Experiment: TPC1-p13-p15-112508

Peak List Generator:

Database Name: Sprot\_060206.fasta

Search Engine Set: 2 Search Engines

Scaffold Version: Scaffold\_2\_01\_02

Version: Bioworks 3.3.1  
Charge States Calculated: yes  
Deisotoped: noVersion:060206  
Taxonomy: Homo sapiens  
Number of Proteins: 14164

Search Engine: Mascot

Version: 2.1.03  
Samples: All Samples  
Fragment Tolerance: 0.80 Da (Monoisotopic)  
Parent Tolerance: 1.6 Da (Monoisotopic)  
Fixed Modifications: +57 on C (Carbamidomethyl)  
Variable Modifications: +1 on N (Deamidation), +16 on M (Oxidation)  
Database: Sprot\_060206.fasta (selected for Homo sapiens, unknown version, 14164 entries)  
Digestion Enzyme: Trypsin  
Max Missed Cleavages: 2

Search Engine: X! Tandem

Version: 2007.01.01.1  
Samples: All Samples  
Fragment Tolerance: 0.100 Da (Monoisotopic)  
Parent Tolerance: 1.6 Da (Monoisotopic)  
Fixed Modifications: +57 on C (Carbamidomethyl)  
Variable Modifications: +1 on N (Deamidation), +16 on M (Oxidation)  
Database: uniprot\_sprot\_060206  
Digestion Enzyme: Trypsin  
Max Missed Cleavages: 2Peptide Thresholds: 95.0% minimum  
Protein Thresholds: 99.0% minimum and 2 peptides minimum

| Biological sample name | Protein name                                                                                                                                          | Protein accession numbers | Protein molecular weight (Da) | Protein identification probability | Number of unique peptides | Number of unique spectra | Number of total spectra | Percentage sequence coverage |
|------------------------|-------------------------------------------------------------------------------------------------------------------------------------------------------|---------------------------|-------------------------------|------------------------------------|---------------------------|--------------------------|-------------------------|------------------------------|
| TPC1-p13               | (O00115) Deoxyribonuclease-2-alpha precursor (EC 3.1.22.1) (Deoxyribonuclease II alpha) (DNase II alpha) (Acid DNase) (Lysosomal DNase II) (R31240_2) | DNS2A_HUMAN               | 39563                         | 100%                               | 5                         | 5                        | 33                      | 26.40%                       |
| TPC1-p13               | (O00161) Synaptosomal-associated protein 23 (SNAP-23) (Vesicle-membrane fusion protein SNAP-23)                                                       | SNP23_HUMAN               | 23337                         | 100%                               | 2                         | 2                        | 3                       | 20.40%                       |
| TPC1-p13               | (O00462) Beta-mannosidase precursor (EC 3.2.1.25) (Lysosomal beta A mannosidase) (Mannanase) (Mannase)                                                | MANBA_HUMAN               | 100879                        | 100%                               | 8                         | 8                        | 16                      | 12.30%                       |
| TPC1-p13               | (O00468) Agrin precursor                                                                                                                              | AGRN_HUMAN                | 214863                        | 100%                               | 6                         | 6                        | 10                      | 5.28%                        |

## Protein Identified Sequence Coverage in TPC-1

|          |                                                                                                                                                                                                                                                    |             |        |      |    |    |     |        |
|----------|----------------------------------------------------------------------------------------------------------------------------------------------------------------------------------------------------------------------------------------------------|-------------|--------|------|----|----|-----|--------|
| TPC1-p13 | (O00469) Procollagen-lysine,2-oxoglutarate 5-dioxygenase 2 precursor (EC 1.14.11.4) (Lysyl hydroxylase 2) (LH2)                                                                                                                                    | PLOD2_HUMAN | 84669  | 100% | 2  | 2  | 3   | 3.93%  |
| TPC1-p13 | (O00560) Syntenin-1 (Syndecan-binding protein 1) (Melanoma differentiation-associated protein 9) (MDA-9) (Scaffold protein Pbp1) (Pro-TGF-alpha cytoplasmic domain-interacting protein 18) (TACIP18)                                               | SDCB1_HUMAN | 32427  | 100% | 3  | 5  | 13  | 25.50% |
| TPC1-p13 | (O00584) Ribonuclease T2 precursor (EC 3.1.27.-) (Ribonuclease 6)                                                                                                                                                                                  | RNT2_HUMAN  | 29463  | 100% | 10 | 16 | 124 | 55.90% |
| TPC1-p13 | (O00622) Protein CYR61 precursor (Cysteine-rich, angiogenic inducer, 61) (Insulin-like growth factor-binding protein 10) (Protein GIG1)                                                                                                            | CYR61_HUMAN | 42008  | 100% | 3  | 3  | 7   | 19.20% |
| TPC1-p13 | (O00754) Lysosomal alpha-mannosidase precursor (EC 3.2.1.24) (Mannosidase, alpha B) (Lysosomal acid alpha-mannosidase) (Laman) (Mannosidase alpha class 2B member 1) [Contains: Lysosomal alpha-mannosidase A peptide; Lysosomal alpha-mannosidase | MA2B1_HUMAN | 113656 | 100% | 19 | 25 | 91  | 29.70% |
| TPC1-p13 | (O14672) ADAM 10 precursor (EC 3.4.24.81) (A disintegrin and metalloproteinase domain 10) (Mammalian disintegrin-metalloprotease) (Kuzbanian protein homolog) (CDw156c antigen)                                                                    | ADA10_HUMAN | 84125  | 100% | 8  | 9  | 26  | 20.10% |
| TPC1-p13 | (O14773) Tripeptidyl-peptidase 1 precursor (EC 3.4.14.9) (Tripeptidyl-peptidase I) (TPP-I) (Tripeptidyl aminopeptidase) (Lysosomal pepstatin insensitive protease) (LPIC) (Growth-inhibiting gene 1 protein)                                       | TPP1_HUMAN  | 61230  | 100% | 9  | 13 | 86  | 34.30% |
| TPC1-p13 | (O14818) Proteasome subunit alpha type 7 (EC 3.4.25.1) (Proteasome subunit RC6-1) (Proteasome subunit XAPC7)                                                                                                                                       | PSA7_HUMAN  | 27869  | 100% | 3  | 3  | 4   | 20.60% |
| TPC1-p13 | (O15031) Plexin-B2 precursor (MM1)                                                                                                                                                                                                                 | PLXB2_HUMAN | 205081 | 100% | 5  | 5  | 10  | 5.93%  |
| TPC1-p13 | (O15118) Niemann-Pick C1 protein precursor                                                                                                                                                                                                         | NPC1_HUMAN  | 142152 | 100% | 2  | 2  | 3   | 2.50%  |
| TPC1-p13 | (O15212) Prefoldin subunit 6 (Protein Ke2)                                                                                                                                                                                                         | PFD6_HUMAN  | 14565  | 100% | 3  | 3  | 17  | 29.50% |
| TPC1-p13 | (O15230) Laminin alpha-5 chain precursor                                                                                                                                                                                                           | LAMA5_HUMAN | 399681 | 100% | 2  | 2  | 2   | 0.95%  |
| TPC1-p13 | (O15260) Surfeit locus protein 4                                                                                                                                                                                                                   | SURF4_HUMAN | 30377  | 100% | 2  | 2  | 2   | 8.55%  |
| TPC1-p13 | (O15511) Actin-related protein 2/3 complex subunit 5 (ARP2/3 complex 16 kDa subunit) (p16-ARC)                                                                                                                                                     | ARPC5_HUMAN | 16171  | 100% | 2  | 2  | 6   | 16.70% |
| TPC1-p13 | (O43324) Eukaryotic translation elongation factor 1 epsilon-1 (Multisynthetase complex auxiliary component p18) (Elongation factor p18)                                                                                                            | MCA3_HUMAN  | 19793  | 100% | 3  | 3  | 16  | 26.40% |
| TPC1-p13 | (O43399) Tumor protein D54 (hD54) (Tumor protein D52-like 2)                                                                                                                                                                                       | TPD54_HUMAN | 22220  | 100% | 9  | 10 | 51  | 56.30% |
| TPC1-p13 | (O43570) Carbonic anhydrase 12 precursor (EC 4.2.1.1) (Carbonic anhydrase XII) (Carbonate dehydratase XII) (CA-XII) (Tumor antigen HOM-RCC-3.1.3)                                                                                                  | CAH12_HUMAN | 39434  | 100% | 6  | 6  | 11  | 28.00% |

## Protein Identified Sequence Coverage in TPC-1

|          |                                                                                                                                                                                                                                                    |             |        |      |    |    |     |        |
|----------|----------------------------------------------------------------------------------------------------------------------------------------------------------------------------------------------------------------------------------------------------|-------------|--------|------|----|----|-----|--------|
| TPC1-p13 | (O43707) Alpha-actinin-4 (Non-muscle alpha-actinin 4) (F-actin cross linking protein)                                                                                                                                                              | ACTN4_HUMAN | 104839 | 100% | 3  | 3  | 8   | 7.14%  |
| TPC1-p13 | (O43809) Cleavage and polyadenylation specificity factor 5 (Cleavage and polyadenylation specificity factor 25 kDa subunit) (CPSF 25 kDa subunit) (Pre-mRNA cleavage factor Im 25-kDa subunit) (Nucleoside diphosphate-linked moiety X motif 21) ( | CPSF5_HUMAN | 26210  | 100% | 3  | 3  | 8   | 24.70% |
| TPC1-p13 | (O43854) EGF-like repeat and discoidin I-like domain-containing protein 3 precursor (EGF-like repeats and discoidin I-like domains protein 3) (Developmentally-regulated endothelial cell locus 1 protein) (Integrin-binding protein DEL1)         | EDIL3_HUMAN | 53747  | 100% | 2  | 3  | 4   | 7.08%  |
| TPC1-p13 | (O60664) Mannose-6-phosphate receptor-binding protein 1 (Cargo selection protein TIP47) (47 kDa mannose 6-phosphate receptor-binding protein) (47 kDa MPR-binding protein) (Placental protein 17) (PP17)                                           | M6PBP_HUMAN | 47028  | 100% | 7  | 7  | 24  | 29.70% |
| TPC1-p13 | (O75369) Filamin-B (FLN-B) (Beta-filamin) (Actin-binding-like protein) (Thyroid autoantigen) (Truncated actin-binding protein) (Truncated ABP) (ABP-280 homolog) (ABP-278) (Filamin 3) (Filamin homolog 1) (Fh1)                                   | FLNB_HUMAN  | 278172 | 100% | 5  | 5  | 8   | 6.19%  |
| TPC1-p13 | (O75503) Ceroid-lipofuscinosis neuronal protein 5 (Protein CLN5)                                                                                                                                                                                   | CLN5_HUMAN  | 46323  | 100% | 2  | 3  | 9   | 11.50% |
| TPC1-p13 | (O75629) CREG1 protein precursor (Cellular repressor of E1A-stimulated genes 1)                                                                                                                                                                    | CREG1_HUMAN | 24057  | 100% | 3  | 4  | 19  | 22.30% |
| TPC1-p13 | (O75882) Attractin precursor (Mahogany homolog) (DPPT-L)                                                                                                                                                                                           | ATRN_HUMAN  | 158518 | 100% | 2  | 2  | 5   | 1.96%  |
| TPC1-p13 | (O75937) DnaJ homolog subfamily C member 8 (Splicing protein spf31)                                                                                                                                                                                | DNJC8_HUMAN | 29824  | 100% | 3  | 3  | 3   | 21.30% |
| TPC1-p13 | (O95881) Thioredoxin domain-containing protein 12 precursor (EC 1.8.4.2) (Thioredoxin-like protein p19) (Endoplasmic reticulum protein ERp19) (ERp18) (hTLP19)                                                                                     | TXD12_HUMAN | 19188  | 100% | 2  | 2  | 3   | 16.90% |
| TPC1-p13 | (P00338) L-lactate dehydrogenase A chain (EC 1.1.1.27) (LDH-A) (LDH muscle subunit) (LDH-M) (Proliferation-inducing gene 19 protein) (NY-REN-59 antigen)                                                                                           | LDHA_HUMAN  | 36540  | 100% | 9  | 10 | 42  | 34.10% |
| TPC1-p13 | (P00390) Glutathione reductase, mitochondrial precursor (EC 1.8.1.7) (GR) (GRase)                                                                                                                                                                  | GSHR_HUMAN  | 56239  | 100% | 5  | 5  | 10  | 21.50% |
| TPC1-p13 | (P00492) Hypoxanthine-guanine phosphoribosyltransferase (EC 2.4.2.8) (HGPRT) (HGPRTase)                                                                                                                                                            | HPRT_HUMAN  | 24431  | 100% | 6  | 7  | 29  | 43.80% |
| TPC1-p13 | (P00533) Epidermal growth factor receptor precursor (EC 2.7.10.1) (Receptor tyrosine-protein kinase ErbB-1)                                                                                                                                        | EGFR_HUMAN  | 134261 | 100% | 5  | 5  | 7   | 8.26%  |
| TPC1-p13 | (P00558) Phosphoglycerate kinase 1 (EC 2.7.2.3) (Primer recognition protein 2) (PRP 2)                                                                                                                                                             | PGK1_HUMAN  | 44466  | 100% | 12 | 16 | 104 | 43.80% |

## Protein Identified Sequence Coverage in TPC-1

|          |                                                                                                                                                                                                                                               |             |        |      |    |    |     |        |
|----------|-----------------------------------------------------------------------------------------------------------------------------------------------------------------------------------------------------------------------------------------------|-------------|--------|------|----|----|-----|--------|
| TPC1-p13 | (P01011) Alpha-1-antichymotrypsin precursor (ACT) [Contains: Alpha-1-antichymotrypsin His-Pro-less]                                                                                                                                           | AACT_HUMAN  | 47635  | 100% | 2  | 2  | 4   | 8.75%  |
| TPC1-p13 | (P01033) Metalloproteinase inhibitor 1 precursor (TIMP-1) (Erythroid potentiating activity) (EPA) (Tissue inhibitor of metalloproteinases) (Fibroblast collagenase inhibitor) (Collagenase inhibitor)                                         | TIMP1_HUMAN | 23153  | 100% | 2  | 2  | 5   | 15.00% |
| TPC1-p13 | (P01034) Cystatin C precursor (Neuroendocrine basic polypeptide) (Gamma-trace) (Post-gamma-globulin)                                                                                                                                          | CYTC_HUMAN  | 15781  | 100% | 2  | 2  | 6   | 18.50% |
| TPC1-p13 | (P01137) Transforming growth factor beta-1 precursor (TGF-beta-1) [Contains: Latency-associated peptide (LAP)]                                                                                                                                | TGFB1_HUMAN | 44324  | 100% | 4  | 4  | 6   | 24.10% |
| TPC1-p13 | (P01892) HLA class I histocompatibility antigen, A-2 alpha chain precursor (MHC class I antigen A*2)                                                                                                                                          | 1A02_HUMAN  | 40903  | 100% | 4  | 4  | 4   | 31.80% |
| TPC1-p13 | (P02462) Collagen alpha-1(IV) chain precursor                                                                                                                                                                                                 | CO4A1_HUMAN | 160596 | 100% | 10 | 12 | 36  | 12.70% |
| TPC1-p13 | (P02533) Keratin, type I cytoskeletal 14 (Cytokeratin-14) (CK-14) (Keratin-14) (K14)                                                                                                                                                          | K1C14_HUMAN | 51473  | 100% | 4  | 5  | 23  | 27.60% |
| TPC1-p13 | (P02751) Fibronectin precursor (FN) (Cold-insoluble globulin) (CIG)                                                                                                                                                                           | FINC_HUMAN  | 262581 | 100% | 36 | 41 | 150 | 24.00% |
| TPC1-p13 | (P02768) Serum albumin precursor                                                                                                                                                                                                              | ALBU_HUMAN  | 69349  | 100% | 2  | 3  | 9   | 5.91%  |
| TPC1-p13 | (P04062) Glucosylceramidase precursor (EC 3.2.1.45) (Beta-glucocerebrosidase) (Acid beta-glucosidase) (D-glucosyl-N-acylsphingosine glucohydrolase) (Alglucerase) (Imiglucerase)                                                              | GLCM_HUMAN  | 59700  | 100% | 11 | 14 | 38  | 32.50% |
| TPC1-p13 | (P04075) Fructose-bisphosphate aldolase A (EC 4.1.2.13) (Muscle-type aldolase) (Lung cancer antigen NY-LU-1)                                                                                                                                  | ALDOA_HUMAN | 39271  | 100% | 12 | 14 | 57  | 57.90% |
| TPC1-p13 | (P04083) Annexin A1 (Annexin I) (Lipocortin I) (Calpactin II) (Chromobindin-9) (p35) (Phospholipase A2 inhibitory protein)                                                                                                                    | ANXA1_HUMAN | 38567  | 100% | 15 | 21 | 169 | 55.40% |
| TPC1-p13 | (P04179) Superoxide dismutase [Mn], mitochondrial precursor (EC 1.15.1.1)                                                                                                                                                                     | SODM_HUMAN  | 24705  | 100% | 4  | 6  | 39  | 23.40% |
| TPC1-p13 | (P04264) Keratin, type II cytoskeletal 1 (Cytokeratin-1) (CK-1) (Keratin-1) (K1) (67 kDa cytokeatin) (Hair alpha protein)                                                                                                                     | K2C1_HUMAN  | 65870  | 100% | 19 | 20 | 104 | 41.20% |
| TPC1-p13 | (P04406) Glyceraldehyde-3-phosphate dehydrogenase (EC 1.2.1.12) (GAPDH)                                                                                                                                                                       | G3P_HUMAN   | 35904  | 100% | 12 | 14 | 98  | 59.60% |
| TPC1-p13 | (P04632) Calpain small subunit 1 (CSS1) (Calcium-dependent protease small subunit 1) (Calcium-dependent protease small subunit) (CDPS) (Calpain regulatory subunit) (Calcium-activated neutral proteinase small subunit) (CANP small subunit) | CPNS1_HUMAN | 28299  | 100% | 2  | 2  | 3   | 17.50% |

## Protein Identified Sequence Coverage in TPC-1

|          |                                                                                                                                                                                                                            |             |        |      |    |    |     |        |
|----------|----------------------------------------------------------------------------------------------------------------------------------------------------------------------------------------------------------------------------|-------------|--------|------|----|----|-----|--------|
| TPC1-p13 | (P04792) Heat-shock protein beta-1 (HspB1) (Heat shock 27 kDa protein) (HSP 27) (Stress-responsive protein 27) (SRP27) (Estrogen-regulated 24 kDa protein) (28 kDa heat shock protein)                                     | HSPB1_HUMAN | 22765  | 100% | 3  | 3  | 10  | 31.20% |
| TPC1-p13 | (P05106) Integrin beta-3 precursor (Platelet membrane glycoprotein IIIa) (GPIIIa) (CD61 antigen)                                                                                                                           | ITB3_HUMAN  | 87196  | 100% | 20 | 23 | 133 | 41.60% |
| TPC1-p13 | (P05362) Intercellular adhesion molecule 1 precursor (ICAM-1) (Major group rhinovirus receptor) (CD54 antigen)                                                                                                             | ICAM1_HUMAN | 57807  | 100% | 8  | 8  | 28  | 20.50% |
| TPC1-p13 | (P05556) Integrin beta-1 precursor (Fibronectin receptor beta subunit) (Integrin VLA-4 beta subunit) (CD29 antigen)                                                                                                        | ITB1_HUMAN  | 88447  | 100% | 33 | 42 | 358 | 48.70% |
| TPC1-p13 | (P05783) Keratin, type I cytoskeletal 18 (Cytokeratin-18) (CK-18) (Keratin-18) (K18)                                                                                                                                       | K1C18_HUMAN | 47910  | 100% | 3  | 3  | 4   | 14.00% |
| TPC1-p13 | (P05787) Keratin, type II cytoskeletal 8 (Cytokeratin-8) (CK-8) (Keratin-8) (K8)                                                                                                                                           | K2C8_HUMAN  | 53557  | 100% | 5  | 5  | 8   | 17.80% |
| TPC1-p13 | (P05997) Collagen alpha-2(V) chain precursor                                                                                                                                                                               | CO5A2_HUMAN | 144702 | 100% | 4  | 4  | 12  | 5.35%  |
| TPC1-p13 | (P06280) Alpha-galactosidase A precursor (EC 3.2.1.22) (Melibiase) (Alpha-D-galactoside galactohydrolase) (Alpha-D-galactosidase A) (Agalsidase alfa)                                                                      | AGAL_HUMAN  | 48750  | 100% | 5  | 6  | 22  | 17.50% |
| TPC1-p13 | (P06396) Gelsolin precursor (Actin-depolymerizing factor) (ADF) (Brevin) (AGEL)                                                                                                                                            | GELS_HUMAN  | 85680  | 100% | 4  | 5  | 9   | 8.70%  |
| TPC1-p13 | (P06733) Alpha-enolase (EC 4.2.1.11) (2-phospho-D-glycerate hydro-lyase) (Non-neural enolase) (NNE) (Enolase 1) (Phosphopyruvate hydratase) (C-myc promoter-binding protein) (MBP-1) (MPB-1) (Plasminogen-binding protein) | ENOA_HUMAN  | 47021  | 100% | 15 | 21 | 195 | 53.30% |
| TPC1-p13 | (P06744) Glucose-6-phosphate isomerase (EC 5.3.1.9) (GPI) (Phosphoglucose isomerase) (PGI) (Phosphohexose isomerase) (PHI) (Neuroleukin) (NLK) (Sperm antigen 36) (SA-36)                                                  | G6PI_HUMAN  | 62999  | 100% | 4  | 5  | 15  | 13.60% |
| TPC1-p13 | (P06748) Nucleophosmin (NPM) (Nucleolar phosphoprotein B23) (Numatrin) (Nucleolar protein NO38)                                                                                                                            | NPM_HUMAN   | 32557  | 100% | 5  | 7  | 71  | 25.90% |
| TPC1-p13 | (P06865) Beta-hexosaminidase alpha chain precursor (EC 3.2.1.52) (N-acetyl-beta-glucosaminidase) (Beta-N-acetylhexosaminidase) (Hexosaminidase A)                                                                          | HEXA_HUMAN  | 60672  | 100% | 18 | 25 | 158 | 40.80% |
| TPC1-p13 | (P07195) L-lactate dehydrogenase B chain (EC 1.1.1.27) (LDH-B) (LDH heart subunit) (LDH-H) (NY-REN-46 antigen)                                                                                                             | LDHB_HUMAN  | 36489  | 100% | 8  | 8  | 42  | 34.80% |
| TPC1-p13 | (P07237) Protein disulfide-isomerase precursor (EC 5.3.4.1) (PDI) (Prolyl 4-hydroxylase beta subunit) (Cellular thyroid hormone-binding protein) (p55)                                                                     | PDIA1_HUMAN | 57100  | 100% | 17 | 22 | 109 | 47.20% |

## Protein Identified Sequence Coverage in TPC-1

|          |                                                                                                                                                                                                                                                      |             |        |      |    |    |     |        |
|----------|------------------------------------------------------------------------------------------------------------------------------------------------------------------------------------------------------------------------------------------------------|-------------|--------|------|----|----|-----|--------|
| TPC1-p13 | (P07339) Cathepsin D precursor (EC 3.4.23.5) [Contains: Cathepsin D light chain; Cathepsin D heavy chain]                                                                                                                                            | CATD_HUMAN  | 44535  | 100% | 19 | 27 | 498 | 59.20% |
| TPC1-p13 | (P07355) Annexin A2 (Annexin II) (Lipocortin II) (Calpactin I heavy chain) (Chromobindin-8) (p36) (Protein I) (Placental anticoagulant protein IV) (PAP-IV)                                                                                          | ANXA2_HUMAN | 38457  | 100% | 23 | 33 | 452 | 66.30% |
| TPC1-p13 | (P07437) Tubulin beta-2 chain                                                                                                                                                                                                                        | TBB2_HUMAN  | 49653  | 100% | 14 | 15 | 67  | 51.10% |
| TPC1-p13 | (P07602) Proactivator polypeptide precursor [Contains: Saposin A (Protein A); Saposin B-Val; Saposin B (Sphingolipid activator protein 1) (SAP-1) (Cerebroside sulfate activator) (CSAct) (Dispersin) (Sulfatide/GM1 activator); Saposin C (Co-beta- | SAP_HUMAN   | 58094  | 100% | 26 | 33 | 336 | 61.30% |
| TPC1-p13 | (P07686) Beta-hexosaminidase beta chain precursor (EC 3.2.1.52) (N-acetyl-beta-glucosaminidase) (Beta-N-acetylhexosaminidase) (Hexosaminidase B) (Cervical cancer proto-oncogene 7) (HCC-7) [Contains: Beta-hexosaminidase beta-B chain; Beta-hexos  | HEXB_HUMAN  | 63095  | 100% | 16 | 19 | 169 | 43.90% |
| TPC1-p13 | (P07711) Cathepsin L precursor (EC 3.4.22.15) (Major excreted protein) (MEP) [Contains: Cathepsin L heavy chain; Cathepsin L light chain]                                                                                                            | CATL_HUMAN  | 37546  | 100% | 7  | 8  | 18  | 39.90% |
| TPC1-p13 | (P07737) Profilin-1 (Profilin I)                                                                                                                                                                                                                     | PROF1_HUMAN | 14905  | 100% | 7  | 7  | 55  | 63.30% |
| TPC1-p13 | (P07858) Cathepsin B precursor (EC 3.4.22.1) (Cathepsin B1) (APP secretase) (APPS) [Contains: Cathepsin B light chain; Cathepsin B heavy chain]                                                                                                      | CATB_HUMAN  | 37803  | 100% | 11 | 18 | 221 | 44.50% |
| TPC1-p13 | (P07900) Heat shock protein HSP 90-alpha (HSP 86) (NY-REN-38 antigen)                                                                                                                                                                                | HS90A_HUMAN | 84514  | 100% | 7  | 7  | 27  | 15.90% |
| TPC1-p13 | (P07942) Laminin beta-1 chain precursor (Laminin B1 chain)                                                                                                                                                                                           | LAMB1_HUMAN | 198045 | 100% | 18 | 21 | 52  | 17.00% |
| TPC1-p13 | (P07996) Thrombospondin-1 precursor                                                                                                                                                                                                                  | TSP1_HUMAN  | 129394 | 100% | 5  | 5  | 38  | 6.15%  |
| TPC1-p13 | (P08133) Annexin A6 (Annexin VI) (Lipocortin VI) (P68) (P70) (Protein III) (Chromobindin-20) (67 kDa calelectrin) (Calphobindin-II) (CPB-II)                                                                                                         | ANXA6_HUMAN | 75728  | 100% | 4  | 4  | 5   | 9.52%  |
| TPC1-p13 | (P08195) 4F2 cell-surface antigen heavy chain (4F2hc) (Lymphocyte activation antigen 4F2 large subunit) (4F2 heavy chain antigen) (CD98 antigen)                                                                                                     | 4F2_HUMAN   | 57929  | 100% | 6  | 7  | 15  | 19.80% |
| TPC1-p13 | (P08236) Beta-glucuronidase precursor (EC 3.2.1.31) (Beta-G1)                                                                                                                                                                                        | BGLR_HUMAN  | 74699  | 100% | 5  | 5  | 18  | 12.30% |
| TPC1-p13 | (P08238) Heat shock protein HSP 90-beta (HSP 84) (HSP 90)                                                                                                                                                                                            | HS90B_HUMAN | 83118  | 100% | 3  | 3  | 9   | 12.70% |
| TPC1-p13 | (P08572) Collagen alpha-2(IV) chain precursor                                                                                                                                                                                                        | CO4A2_HUMAN | 167522 | 100% | 5  | 5  | 13  | 5.49%  |

Protein Identified Sequence Coverage in TPC-1

|          |                                                                                                                                                                                                                                  |             |        |      |    |    |     |        |
|----------|----------------------------------------------------------------------------------------------------------------------------------------------------------------------------------------------------------------------------------|-------------|--------|------|----|----|-----|--------|
| TPC1-p13 | (P08581) Hepatocyte growth factor receptor precursor (EC 2.7.10.1) (HGF receptor) (Scatter factor receptor) (SF receptor) (HGF/SF receptor) (Met proto-oncogene tyrosine kinase) (c-Met)                                         | MET_HUMAN   | 155511 | 100% | 2  | 2  | 2   | 3.17%  |
| TPC1-p13 | (P08648) Integrin alpha-5 precursor (Fibronectin receptor alpha subunit) (Integrin alpha-F) (VLA-5) (CD49e antigen) [Contains: Integrin alpha-5 heavy chain; Integrin alpha-5 light chain]                                       | ITA5_HUMAN  | 114521 | 100% | 13 | 14 | 29  | 19.70% |
| TPC1-p13 | (P08758) Annexin A5 (Annexin V) (Lipocortin V) (Endonexin II) (Calphobindin I) (CBP-I) (Placental anticoagulant protein I) (PAP-I) (PP4) (Thromboplastin inhibitor) (Vascular anticoagulant-alpha) (VAC-alpha) (Anchorin CII)    | ANXA5_HUMAN | 35789  | 100% | 12 | 15 | 48  | 51.40% |
| TPC1-p13 | (P08779) Keratin, type I cytoskeletal 16 (Cytokeratin-16) (CK-16) (Keratin-16) (K16)                                                                                                                                             | K1C16_HUMAN | 51120  | 100% | 15 | 18 | 80  | 41.90% |
| TPC1-p13 | (P08865) 40S ribosomal protein SA (p40) (34/67 kDa laminin receptor) (Colon carcinoma laminin-binding protein) (NEM/1CHD4) (Multidrug resistance-associated protein MGr1-Ag)                                                     | RSSA_HUMAN  | 32705  | 100% | 10 | 13 | 75  | 52.00% |
| TPC1-p13 | (P08962) CD63 antigen (Melanoma-associated antigen ME491) (Lysosome-associated membrane glycoprotein 3) (LAMP-3) (Ocular melanoma-associated antigen) (OMA81H) (Granulophysin) (Tetraspanin-30) (Tspan-30)                       | CD63_HUMAN  | 25487  | 100% | 2  | 2  | 3   | 21.10% |
| TPC1-p13 | (P09211) Glutathione S-transferase P (EC 2.5.1.18) (GST class-pi) (GSTP1-1)                                                                                                                                                      | GSTP1_HUMAN | 23208  | 100% | 8  | 9  | 41  | 60.80% |
| TPC1-p13 | (P09382) Galectin-1 (Lectin galactoside-binding soluble 1) (Beta-galactoside-binding lectin L-14-I) (Lactose-binding lectin 1) (S-Lac lectin 1) (Galaptin) (14 kDa lectin) (HPL) (HBL) (Putative MAPK-activating protein MP12)   | LEG1_HUMAN  | 14567  | 100% | 5  | 9  | 118 | 57.50% |
| TPC1-p13 | (P09429) High mobility group protein B1 (High mobility group protein 1) (HMG-1)                                                                                                                                                  | HMGB1_HUMAN | 24746  | 100% | 3  | 3  | 3   | 21.50% |
| TPC1-p13 | (P09493) Tropomyosin 1 alpha chain (Alpha-tropomyosin)                                                                                                                                                                           | TPM1_HUMAN  | 32692  | 100% | 4  | 4  | 12  | 19.00% |
| TPC1-p13 | (P09525) Annexin A4 (Annexin IV) (Lipocortin IV) (Endonexin I) (Chromobindin-4) (Protein II) (P32.5) (Placental anticoagulant protein II) (PAP-II) (PP4-X) (35-beta calcimedlin) (Carbohydrate-binding protein P33/P41) (P33/41) | ANXA4_HUMAN | 35735  | 100% | 2  | 2  | 4   | 10.10% |
| TPC1-p13 | (P09661) U2 small nuclear ribonucleoprotein A' (U2 snRNP-A')                                                                                                                                                                     | RU2A_HUMAN  | 28399  | 100% | 6  | 6  | 20  | 41.60% |
| TPC1-p13 | (P09936) Ubiquitin carboxyl-terminal hydrolase isozyme L1 (EC 3.4.19.12) (EC 6.-.-.) (UCH-L1) (Ubiquitin thioesterase L1) (Neuron cytoplasmic protein 9.5) (PGP 9.5) (PGP9.5)                                                    | UCHL1_HUMAN | 24806  | 100% | 4  | 5  | 27  | 23.80% |

## Protein Identified Sequence Coverage in TPC-1

|          |                                                                                                                                                                                                                                                     |             |        |      |    |    |     |        |
|----------|-----------------------------------------------------------------------------------------------------------------------------------------------------------------------------------------------------------------------------------------------------|-------------|--------|------|----|----|-----|--------|
| TPC1-p13 | (P10253) Lysosomal alpha-glucosidase precursor (EC 3.2.1.20) (Acid maltase) (Aglucosidase alfa) [Contains: 76 kDa lysosomal alpha-glucosidase; 70 kDa lysosomal alpha-glucosidase]                                                                  | LYAG_HUMAN  | 105321 | 100% | 21 | 27 | 214 | 35.20% |
| TPC1-p13 | (P10619) Lysosomal protective protein precursor (EC 3.4.16.5) (Cathepsin A) (Carboxypeptidase C) (Protective protein for beta-galactosidase) [Contains: Lysosomal protective protein 32 kDa chain; Lysosomal protective protein 20 kDa chain]       | PPGB_HUMAN  | 54450  | 100% | 14 | 16 | 130 | 37.50% |
| TPC1-p13 | (P11021) 78 kDa glucose-regulated protein precursor (GRP 78) (Immunoglobulin heavy chain-binding protein) (BiP) (Endoplasmic reticulum lumenal Ca(2+)-binding protein grp78)                                                                        | GRP78_HUMAN | 72317  | 100% | 27 | 38 | 259 | 46.00% |
| TPC1-p13 | (P11047) Laminin gamma-1 chain precursor (Laminin B2 chain)                                                                                                                                                                                         | LAMC1_HUMAN | 177587 | 100% | 23 | 24 | 69  | 22.70% |
| TPC1-p13 | (P11117) Lysosomal acid phosphatase precursor (EC 3.1.3.2) (LAP)                                                                                                                                                                                    | PPAL_HUMAN  | 48299  | 100% | 7  | 7  | 14  | 23.20% |
| TPC1-p13 | (P11142) Heat shock cognate 71 kDa protein (Heat shock 70 kDa protein 8)                                                                                                                                                                            | HSP7C_HUMAN | 70882  | 100% | 16 | 20 | 66  | 41.60% |
| TPC1-p13 | (P11166) Solute carrier family 2, facilitated glucose transporter member 1 (Glucose transporter type 1, erythrocyte/brain) (HepG2 glucose transporter)                                                                                              | GTR1_HUMAN  | 54101  | 100% | 2  | 2  | 6   | 4.67%  |
| TPC1-p13 | (P11279) Lysosome-associated membrane glycoprotein 1 precursor (LAMP-1) (CD107a antigen)                                                                                                                                                            | LAMP1_HUMAN | 44756  | 100% | 8  | 10 | 31  | 28.10% |
| TPC1-p13 | (P11717) Cation-independent mannose-6-phosphate receptor precursor (CI Man-6-P receptor) (CI-MPR) (M6PR) (Insulin-like growth factor 2 receptor) (Insulin-like growth factor II receptor) (IGF-II receptor) (M6P/IGF2 receptor) (M6P/IGF2R) (300 kD | MPRI_HUMAN  | 274256 | 100% | 8  | 9  | 10  | 5.74%  |
| TPC1-p13 | (P12109) Collagen alpha-1(VI) chain precursor                                                                                                                                                                                                       | CO6A1_HUMAN | 108531 | 100% | 6  | 6  | 9   | 11.70% |
| TPC1-p13 | (P12429) Annexin A3 (Annexin III) (Lipocortin III) (Placental anticoagulant protein III) (PAP-III) (35-alpha calcimedlin) (Inositol 1,2-cyclic phosphate 2-phosphohydrolase)                                                                        | ANXA3_HUMAN | 36228  | 100% | 4  | 4  | 10  | 16.10% |
| TPC1-p13 | (P12814) Alpha-actinin-1 (Alpha-actinin cytoskeletal isoform) (Non-muscle alpha-actinin-1) (F-actin cross linking protein)                                                                                                                          | ACTN1_HUMAN | 103043 | 100% | 2  | 2  | 2   | 5.27%  |
| TPC1-p13 | (P13284) Gamma-interferon-inducible lysosomal thiol reductase precursor (Gamma-interferon-inducible protein IP-30)                                                                                                                                  | GILT_HUMAN  | 29131  | 100% | 5  | 6  | 19  | 47.50% |
| TPC1-p13 | (P13473) Lysosome-associated membrane glycoprotein 2 precursor (LAMP-2) (CD107b antigen)                                                                                                                                                            | LAMP2_HUMAN | 44943  | 100% | 4  | 4  | 15  | 15.60% |



## Protein Identified Sequence Coverage in TPC-1

|          |                                                                                                                                                                                                                                                      |                |        |      |    |    |     |        |
|----------|------------------------------------------------------------------------------------------------------------------------------------------------------------------------------------------------------------------------------------------------------|----------------|--------|------|----|----|-----|--------|
| TPC1-p13 | (P13591) Neural cell adhesion molecule 1, 140 kDa isoform precursor (N-CAM 140) (NCAM-140) (CD56 antigen)                                                                                                                                            | NCA11_HUMAN,NC | 93343  | 100% | 7  | 8  | 16  | 13.80% |
| TPC1-p13 | (P13611) Versican core protein precursor (Large fibroblast proteoglycan) (Chondroitin sulfate proteoglycan core protein 2) (PG-M) (Glial hyaluronate-binding protein) (GHAP)                                                                         | CSPG2_HUMAN    | 372795 | 100% | 15 | 17 | 80  | 6.54%  |
| TPC1-p13 | (P13645) Keratin, type I cytoskeletal 10 (Cytokeratin-10) (CK-10) (Keratin-10) (K10)                                                                                                                                                                 | K1C10_HUMAN    | 59502  | 100% | 10 | 11 | 15  | 25.50% |
| TPC1-p13 | (P13667) Protein disulfide-isomerase A4 precursor (EC 5.3.4.1) (Protein ERp-72) (ERp72)                                                                                                                                                              | PDIA4_HUMAN    | 72916  | 100% | 29 | 38 | 366 | 46.40% |
| TPC1-p13 | (P13796) Plastin-2 (L-plastin) (Lymphocyte cytosolic protein 1) (LCP-1) (LC64P)                                                                                                                                                                      | PLSL_HUMAN     | 70143  | 100% | 2  | 2  | 3   | 4.79%  |
| TPC1-p13 | (P13987) CD59 glycoprotein precursor (Membrane attack complex inhibition factor) (MACIF) (MAC-inhibitory protein) (MAC-IP) (Protectin) (MEM43 antigen) (Membrane inhibitor of reactive lysis) (MIRL) (20 kDa homologous restriction factor) (HRF-20) | CD59_HUMAN     | 14159  | 100% | 6  | 7  | 121 | 38.30% |
| TPC1-p13 | (P14314) Glucosidase 2 beta subunit precursor (Glucosidase II beta subunit) (Protein kinase C substrate, 60.1 kDa protein, heavy chain) (PKCSH) (80K-H protein)                                                                                      | GLU2B_HUMAN    | 59279  | 100% | 20 | 26 | 226 | 53.30% |
| TPC1-p13 | (P14618) Pyruvate kinase isozymes M1/M2 (EC 2.7.1.40) (Pyruvate kinase muscle isozyme) (Cytosolic thyroid hormone-binding protein) (CTHBP) (THBP1)                                                                                                   | KPYM_HUMAN     | 57788  | 100% | 17 | 21 | 92  | 44.00% |
| TPC1-p13 | (P14625) Endoplasmic precursor (Heat shock protein 90 kDa beta member 1) (94 kDa glucose-regulated protein) (GRP94) (gp96 homolog) (Tumor rejection antigen 1)                                                                                       | ENPL_HUMAN     | 92454  | 100% | 3  | 3  | 3   | 9.22%  |
| TPC1-p13 | (P15151) Poliovirus receptor precursor (Nectin-like protein 5) (Necl-5) (CD155 antigen)                                                                                                                                                              | PVR_HUMAN      | 45284  | 100% | 4  | 4  | 16  | 12.50% |
| TPC1-p13 | (P15289) Arylsulfatase A precursor (EC 3.1.6.8) (ASA) (Cerebrosidase-sulfatase) [Contains: Arylsulfatase A component B; Arylsulfatase A component C]                                                                                                 | ARSA_HUMAN     | 53571  | 100% | 8  | 11 | 106 | 28.60% |
| TPC1-p13 | (P15531) Nucleoside diphosphate kinase A (EC 2.7.4.6) (NDK A) (NDP kinase A) (Tumor metastatic process-associated protein) (Metastasis inhibition factor nm23) (nm23-H1) (Granzyme A-activated DNase) (GAAD)                                         | NDKA_HUMAN     | 17131  | 100% | 4  | 5  | 40  | 59.90% |
| TPC1-p13 | (P15586) N-acetylglucosamine-6-sulfatase precursor (EC 3.1.6.14) (G6S) (Glucosamine-6-sulfatase)                                                                                                                                                     | GL6S_HUMAN     | 62066  | 100% | 20 | 23 | 150 | 51.60% |
| TPC1-p13 | (P15848) Arylsulfatase B precursor (EC 3.1.6.12) (ASB) (N-acetylgalactosamine-4-sulfatase) (G4S)                                                                                                                                                     | ARSB_HUMAN     | 59671  | 100% | 5  | 7  | 15  | 16.30% |

## Protein Identified Sequence Coverage in TPC-1

|          |                                                                                                                                                                                                                                                     |             |        |      |    |    |     |        |
|----------|-----------------------------------------------------------------------------------------------------------------------------------------------------------------------------------------------------------------------------------------------------|-------------|--------|------|----|----|-----|--------|
| TPC1-p13 | (P16070) CD44 antigen precursor (Phagocytic glycoprotein I) (PGP-1) (HUTCH-I) (Extracellular matrix receptor-III) (ECMR-III) (GP90 lymphocyte homing/adhesion receptor) (Hermes antigen) (Hyaluronate receptor) (Heparan sulfate proteoglycan) (Epi | CD44_HUMAN  | 81535  | 100% | 11 | 13 | 173 | 14.70% |
| TPC1-p13 | (P16278) Beta-galactosidase precursor (EC 3.2.1.23) (Lactase) (Acid beta-galactosidase)                                                                                                                                                             | BGAL_HUMAN  | 76076  | 100% | 13 | 14 | 94  | 25.70% |
| TPC1-p13 | (P17050) Alpha-N-acetylgalactosaminidase precursor (EC 3.2.1.49) (Alpha-galactosidase B)                                                                                                                                                            | NAGAB_HUMAN | 46548  | 100% | 11 | 13 | 117 | 39.20% |
| TPC1-p13 | (P17301) Integrin alpha-2 precursor (Platelet membrane glycoprotein Ia) (GPIa) (Collagen receptor) (VLA-2 alpha chain) (CD49b antigen)                                                                                                              | ITA2_HUMAN  | 129280 | 100% | 9  | 9  | 16  | 14.60% |
| TPC1-p13 | (P17813) Endoglin precursor (CD105 antigen)                                                                                                                                                                                                         | EGLN_HUMAN  | 70561  | 100% | 2  | 2  | 5   | 7.60%  |
| TPC1-p13 | (P18084) Integrin beta-5 precursor                                                                                                                                                                                                                  | ITB5_HUMAN  | 88037  | 100% | 12 | 12 | 34  | 26.80% |
| TPC1-p13 | (P18206) Vinculin (Metavinculin)                                                                                                                                                                                                                    | VINC_HUMAN  | 123652 | 100% | 20 | 21 | 72  | 28.20% |
| TPC1-p13 | (P18669) Phosphoglycerate mutase 1 (EC 5.4.2.1) (EC 5.4.2.4) (EC 3.1.3.13) (Phosphoglycerate mutase isozyme B) (PGAM-B) (BPG-dependent PGAM 1)                                                                                                      | PGAM1_HUMAN | 28656  | 100% | 4  | 4  | 16  | 24.90% |
| TPC1-p13 | (P19022) Neural-cadherin precursor (N-cadherin) (Cadherin-2) (CDw325 antigen)                                                                                                                                                                       | CADH2_HUMAN | 99836  | 100% | 5  | 5  | 16  | 13.60% |
| TPC1-p13 | (P19105) Myosin regulatory light chain 2, nonsarcomeric (Myosin RLC)                                                                                                                                                                                | MLRM_HUMAN  | 19646  | 100% | 2  | 2  | 8   | 12.40% |
| TPC1-p13 | (P19338) Nucleolin (Protein C23)                                                                                                                                                                                                                    | NUCL_HUMAN  | 76467  | 100% | 6  | 6  | 9   | 11.60% |
| TPC1-p13 | (P20618) Proteasome subunit beta type 1 (EC 3.4.25.1) (Proteasome component C5) (Macropain subunit C5) (Multicatalytic endopeptidase complex subunit C5) (Proteasome gamma chain)                                                                   | PSB1_HUMAN  | 26473  | 100% | 8  | 8  | 26  | 45.20% |
| TPC1-p13 | (P20933) N(4)-(beta-N-acetylglucosaminy)-L-asparaginase precursor (EC 3.5.1.26) (Glycosylasparaginase) (Aspartylglucosaminidase) (N4-(N-acetyl-beta-glucosaminy)-L-asparagine amidase) (AGA) [Contains: Glycosylasparaginase alpha chain; Glycosy   | ASPG_HUMAN  | 37176  | 100% | 3  | 4  | 19  | 17.10% |
| TPC1-p13 | (P21333) Filamin-A (Alpha-filamin) (Filamin-1) (Endothelial actin-binding protein) (Actin-binding protein 280) (ABP-280) (Nonmuscle filamin)                                                                                                        | FLNA_HUMAN  | 280602 | 100% | 33 | 35 | 117 | 22.50% |
| TPC1-p13 | (P21589) 5'-nucleotidase precursor (EC 3.1.3.5) (Ecto-5'-nucleotidase) (5'-NT) (CD73 antigen)                                                                                                                                                       | 5NTD_HUMAN  | 63351  | 100% | 17 | 22 | 125 | 47.40% |
| TPC1-p13 | (P21796) Voltage-dependent anion-selective channel protein 1 (VDAC-1) (hVDAC1) (Outer mitochondrial membrane protein porin 1) (Plasmalemmal porin) (Porin 31HL) (Porin 31HM)                                                                        | VDAC1_HUMAN | 30625  | 100% | 2  | 2  | 2   | 8.16%  |
| TPC1-p13 | (P21926) CD9 antigen (p24) (Leukocyte antigen MIC3) (Motility-related protein) (MRP-1) (Tetraspanin-29) (Tspan-29)                                                                                                                                  | CD9_HUMAN   | 25268  | 100% | 2  | 3  | 14  | 15.40% |

## Protein Identified Sequence Coverage in TPC-1

|          |                                                                                                                                                                                                                                          |             |        |      |    |    |     |        |
|----------|------------------------------------------------------------------------------------------------------------------------------------------------------------------------------------------------------------------------------------------|-------------|--------|------|----|----|-----|--------|
| TPC1-p13 | (P22061) Protein-L-isoaspartate(D-aspartate) O-methyltransferase (EC 2.1.1.77) (Protein-beta-aspartate methyltransferase) (PIMT) (Protein L-isoaspartyl/D-aspartyl methyltransferase) (L-isoaspartyl protein carboxyl methyltransferase) | PIMT_HUMAN  | 24502  | 100% | 3  | 3  | 5   | 25.20% |
| TPC1-p13 | (P22234) Multifunctional protein ADE2 [Includes: Phosphoribosylaminoimidazole-succinocarboxamide synthase (EC 6.3.2.6) (SAICAR synthetase); Phosphoribosylaminoimidazole carboxylase (EC 4.1.1.21) (AIR carboxylase) (AIRC)]             | PUR6_HUMAN  | 46931  | 100% | 7  | 8  | 21  | 19.80% |
| TPC1-p13 | (P22304) Iduronate 2-sulfatase precursor (EC 3.1.6.13) (Alpha-L-iduronate sulfate sulfatase) (Idursulfase) [Contains: Iduronate 2-sulfatase 42 kDa chain; Iduronate 2-sulfatase 14 kDa chain]                                            | IDS_HUMAN   | 61857  | 100% | 2  | 2  | 7   | 8.36%  |
| TPC1-p13 | (P22307) Nonspecific lipid-transfer protein (EC 2.3.1.176) (Propanoyl-CoA C-acyltransferase) (NSL-TP) (Sterol carrier protein 2) (SCP-2) (Sterol carrier protein X) (SCP-X) (SCP-chi) (SCPX)                                             | NLTP_HUMAN  | 58977  | 100% | 2  | 2  | 4   | 4.20%  |
| TPC1-p13 | (P22392) Nucleoside diphosphate kinase B (EC 2.7.4.6) (NDK B) (NDP kinase B) (nm23-H2) (C-myc purine-binding transcription factor PUF)                                                                                                   | NDKB_HUMAN  | 17280  | 100% | 8  | 10 | 99  | 60.50% |
| TPC1-p13 | (P23284) Peptidyl-prolyl cis-trans isomerase B precursor (EC 5.2.1.8) (PPIase) (Rotamase) (Cyclophilin B) (S-cyclophilin) (SCYLP) (CYP-S1)                                                                                               | PPIB_HUMAN  | 22725  | 100% | 4  | 4  | 11  | 19.20% |
| TPC1-p13 | (P23396) 40S ribosomal protein S3                                                                                                                                                                                                        | RS3_HUMAN   | 26671  | 100% | 7  | 8  | 31  | 40.70% |
| TPC1-p13 | (P23470) Receptor-type tyrosine-protein phosphatase gamma precursor (EC 3.1.3.48) (Protein-tyrosine phosphatase gamma) (R-PTP-gamma)                                                                                                     | PTPRG_HUMAN | 162042 | 100% | 4  | 5  | 7   | 4.57%  |
| TPC1-p13 | (P23528) Cofilin-1 (Cofilin, non-muscle isoform) (18 kDa phosphoprotein) (p18)                                                                                                                                                           | COF1_HUMAN  | 18354  | 100% | 7  | 11 | 67  | 50.90% |
| TPC1-p13 | (P24821) Tenascin precursor (TN) (Hexabrachion) (Cytotactin) (Neuronectin) (GMEM) (JI) (Miotendinous antigen) (Glioma-associated-extracellular matrix antigen) (GP 150-225) (Tenascin-C) (TN-C)                                          | TENA_HUMAN  | 240845 | 100% | 25 | 27 | 77  | 19.20% |
| TPC1-p13 | (P25942) Tumor necrosis factor receptor superfamily member 5 precursor (CD40L receptor) (B-cell surface antigen CD40) (CDw40) (Bp50)                                                                                                     | TNR5_HUMAN  | 30600  | 100% | 4  | 4  | 7   | 33.90% |
| TPC1-p13 | (P26006) Integrin alpha-3 precursor (Galactoprotein B3) (GAPB3) (VLA-3 alpha chain) (FRP-2) (CD49c antigen) [Contains: Integrin alpha-3 heavy chain; Integrin alpha-3 light chain]                                                       | ITA3_HUMAN  | 118682 | 100% | 27 | 33 | 204 | 34.70% |
| TPC1-p13 | (P26038) Moesin (Membrane-organizing extension spike protein)                                                                                                                                                                            | MOES_HUMAN  | 67673  | 100% | 7  | 8  | 29  | 16.30% |

## Protein Identified Sequence Coverage in TPC-1

|          |                                                                                                                                                                                                                                                      |                |        |      |    |    |     |        |
|----------|------------------------------------------------------------------------------------------------------------------------------------------------------------------------------------------------------------------------------------------------------|----------------|--------|------|----|----|-----|--------|
| TPC1-p13 | (P26641) Elongation factor 1-gamma (EF-1-gamma) (eEF-1B gamma)                                                                                                                                                                                       | EF1G_HUMAN     | 49970  | 100% | 2  | 2  | 2   | 6.19%  |
| TPC1-p13 | (P26885) FK506-binding protein 2 precursor (EC 5.2.1.8) (Peptidyl-prolyl cis-trans isomerase) (PPIase) (Rotamase) (13 kDa FKBP) (FKBP-13)                                                                                                            | FKBP2_HUMAN    | 15632  | 100% | 3  | 4  | 17  | 38.00% |
| TPC1-p13 | (P27348) 14-3-3 protein theta (14-3-3 protein tau) (14-3-3 protein T-cell) (HS1 protein)                                                                                                                                                             | 1433T_HUMAN    | 27747  | 100% | 7  | 8  | 27  | 34.30% |
| TPC1-p13 | (P27487) Dipeptidyl peptidase 4 (EC 3.4.14.5) (Dipeptidyl peptidase IV) (DPP IV) (T-cell activation antigen CD26) (TP103) (Adenosine deaminase complexing protein 2) (ADABP) [Contains: Dipeptidyl peptidase 4 membrane form (Dipeptidyl peptidase   | DPP4_HUMAN     | 88263  | 100% | 23 | 25 | 103 | 38.30% |
| TPC1-p13 | (P27695) DNA-(apurinic or apyrimidinic site) lyase (EC 4.2.99.18) (AP endonuclease 1) (APEX nuclease) (APEN) (REF-1 protein)                                                                                                                         | APEX1_HUMAN    | 35407  | 100% | 7  | 7  | 29  | 37.90% |
| TPC1-p13 | (P27797) Calreticulin precursor (CRP55) (Calregulin) (HACBP) (ERp60) (grp60)                                                                                                                                                                         | CRTC_HUMAN     | 48125  | 100% | 13 | 16 | 98  | 49.20% |
| TPC1-p13 | (P27816) Microtubule-associated protein 4 (MAP 4)                                                                                                                                                                                                    | MAP4_HUMAN     | 121003 | 100% | 2  | 2  | 3   | 4.17%  |
| TPC1-p13 | (P28799) Granulins precursor (Proepithelin) (PEPI) [Contains: Acrogranin; Paragranulin; Granulin-1 (Granulin G); Granulin-2 (Granulin F); Granulin-3 (Granulin B); Granulin-4 (Granulin A); Granulin-5 (Granulin C); Granulin-6 (Granulin D); Granul | GRN_HUMAN      | 63522  | 100% | 7  | 8  | 20  | 19.40% |
| TPC1-p13 | (P29043) 47 kDa heat shock protein precursor (Collagen-binding protein 1) (Colligin 1)                                                                                                                                                               | HSP47_HUMAN,SP | 46251  | 100% | 6  | 7  | 41  | 17.70% |
| TPC1-p13 | (P29323) Ephrin type-B receptor 2 precursor (EC 2.7.10.1) (Tyrosine-protein kinase receptor EPH-3) (DRT) (Receptor protein-tyrosine kinase HEK5) (ERK) (NY-REN-47 antigen)                                                                           | EPHB2_HUMAN    | 117476 | 100% | 2  | 2  | 2   | 2.94%  |
| TPC1-p13 | (P29401) Transketolase (EC 2.2.1.1) (TK)                                                                                                                                                                                                             | TKT_HUMAN      | 67861  | 100% | 8  | 10 | 50  | 27.00% |
| TPC1-p13 | (P29966) Myristoylated alanine-rich C-kinase substrate (MARCKS) (Protein kinase C substrate, 80 kDa protein, light chain) (PKCSL) (80K-L protein)                                                                                                    | MARCS_HUMAN    | 31405  | 100% | 4  | 6  | 30  | 30.50% |
| TPC1-p13 | (P30040) Endoplasmic reticulum protein ERp29 precursor (ERp31) (ERp28)                                                                                                                                                                               | ERP29_HUMAN    | 28977  | 100% | 11 | 12 | 108 | 52.90% |
| TPC1-p13 | (P30041) Peroxiredoxin-6 (EC 1.11.1.15) (Antioxidant protein 2) (1-Cys peroxiredoxin) (1-Cys PRX) (Acidic calcium-independent phospholipase A2) (EC 3.1.1.-) (aiPLA2) (Non-selenium glutathione peroxidase) (EC 1.11.1.7) (NSGPx) (24 kDa protein)   | PRDX6_HUMAN    | 24887  | 100% | 9  | 12 | 59  | 55.60% |

## Protein Identified Sequence Coverage in TPC-1

|          |                                                                                                                                                                                                                                                    |                 |        |      |    |    |    |        |
|----------|----------------------------------------------------------------------------------------------------------------------------------------------------------------------------------------------------------------------------------------------------|-----------------|--------|------|----|----|----|--------|
| TPC1-p13 | (P30044) Peroxiredoxin-5, mitochondrial precursor (EC 1.11.1.15) (Prx-V) (Peroxisomal antioxidant enzyme) (PLP) (Thioredoxin reductase) (Thioredoxin peroxidase PMP20) (Antioxidant enzyme B166) (AOEB166) (TPx type VI) (Liver tissue 2D-page spo | PRDX5_HUMAN     | 22008  | 100% | 4  | 4  | 17 | 29.00% |
| TPC1-p13 | (P30048) Thioredoxin-dependent peroxide reductase, mitochondrial precursor (EC 1.11.1.15) (Peroxiredoxin-3) (Antioxidant protein 1) (AOP-1) (MER5 protein homolog) (HBC189) (PRX III)                                                              | PRDX3_HUMAN     | 27675  | 100% | 5  | 5  | 14 | 33.20% |
| TPC1-p13 | (P30050) 60S ribosomal protein L12                                                                                                                                                                                                                 | RL12_HUMAN      | 17801  | 100% | 5  | 6  | 28 | 49.10% |
| TPC1-p13 | (P30085) UMP-CMP kinase (EC 2.7.4.14) (Cytidylate kinase) (Deoxycytidylate kinase) (Cytidine monophosphate kinase) (Uridine monophosphate/cytidine monophosphate kinase) (UMP/CMP kinase) (UMP/CMPK) (Uridine monophosphate kinase)                | KCY_HUMAN       | 22205  | 100% | 2  | 2  | 2  | 14.30% |
| TPC1-p13 | (P30101) Protein disulfide-isomerase A3 precursor (EC 5.3.4.1) (Disulfide isomerase ER-60) (ERp60) (58 kDa microsomal protein) (p58) (ERp57) (58 kDa glucose-regulated protein)                                                                    | PDIA3_HUMAN     | 56767  | 100% | 9  | 9  | 30 | 22.40% |
| TPC1-p13 | (P30447) HLA class I histocompatibility antigen, A-23 alpha chain precursor (MHC class I antigen A*23) (A-9)                                                                                                                                       | 1A23_HUMAN,1A24 | 40714  | 100% | 2  | 2  | 7  | 27.40% |
| TPC1-p13 | (P30491) HLA class I histocompatibility antigen, B-53 alpha chain precursor (MHC class I antigen B*53) (Bw-53)                                                                                                                                     | 1B53_HUMAN,1B58 | 40319  | 100% | 4  | 4  | 6  | 30.10% |
| TPC1-p13 | (P30508) HLA class I histocompatibility antigen, Cw-12 alpha chain precursor (MHC class I antigen Cw*12)                                                                                                                                           | 1C12_HUMAN      | 40867  | 100% | 8  | 8  | 32 | 33.60% |
| TPC1-p13 | (P31949) Protein S100-A11 (S100 calcium-binding protein A11) (Protein S100C) (Calgizzarin) (MLN 70)                                                                                                                                                | S10AB_HUMAN     | 11723  | 100% | 3  | 3  | 26 | 34.30% |
| TPC1-p13 | (P32119) Peroxiredoxin-2 (EC 1.11.1.15) (Thioredoxin peroxidase 1) (Thioredoxin-dependent peroxide reductase 1) (Thiol-specific antioxidant protein) (TSA) (PRP) (Natural killer cell-enhancing factor B) (NKEF-B)                                 | PRDX2_HUMAN     | 21743  | 100% | 5  | 6  | 34 | 28.40% |
| TPC1-p13 | (P34059) N-acetylgalactosamine-6-sulfatase precursor (EC 3.1.6.4) (N-acetylgalactosamine-6-sulfate sulfatase) (Galactose-6-sulfate sulfatase) (GalNAc6S sulfatase) (Chondroitinsulfatase) (Chondroitinase)                                         | GA6S_HUMAN      | 58009  | 100% | 8  | 9  | 30 | 20.10% |
| TPC1-p13 | (P35221) Alpha-1 catenin (Cadherin-associated protein) (Alpha E-catenin) (NY-REN-13 antigen)                                                                                                                                                       | CTN1_HUMAN      | 100055 | 100% | 2  | 2  | 2  | 5.96%  |
| TPC1-p13 | (P35241) Radixin                                                                                                                                                                                                                                   | RADI_HUMAN      | 68548  | 100% | 2  | 2  | 4  | 10.50% |
| TPC1-p13 | (P35527) Keratin, type I cytoskeletal 9 (Cytokeratin-9) (CK-9) (Keratin-9) (K9)                                                                                                                                                                    | K1C9_HUMAN      | 62113  | 100% | 14 | 16 | 46 | 36.10% |

Protein Identified Sequence Coverage in TPC-1

|          |                                                                                                                                                                                                                                                    |             |        |      |    |    |     |        |
|----------|----------------------------------------------------------------------------------------------------------------------------------------------------------------------------------------------------------------------------------------------------|-------------|--------|------|----|----|-----|--------|
| TPC1-p13 | (P35555) Fibrillin-1 precursor                                                                                                                                                                                                                     | FBN1_HUMAN  | 312283 | 100% | 5  | 5  | 6   | 3.69%  |
| TPC1-p13 | (P35579) Myosin-9 (Myosin heavy chain, nonmuscle IIa) (Nonmuscle myosin heavy chain IIa) (NMMHC II-a) (NMMHC-IIA) (Cellular myosin heavy chain, type A) (Nonmuscle myosin heavy chain-A) (NMMHC-A)                                                 | MYH9_HUMAN  | 226388 | 100% | 8  | 9  | 17  | 7.71%  |
| TPC1-p13 | (P35613) Basigin precursor (Leukocyte activation antigen M6) (Collagenase stimulatory factor) (Extracellular matrix metalloproteinase inducer) (EMMPRIN) (5F7) (Tumor cell-derived collagenase stimulatory factor) (TCSF) (OK blood group antigen) | BASI_HUMAN  | 42182  | 100% | 11 | 15 | 85  | 42.60% |
| TPC1-p13 | (P35658) Nuclear pore complex protein Nup214 (Nucleoporin Nup214) (214 kDa nucleoporin) (CAN protein)                                                                                                                                              | NU214_HUMAN | 213748 | 100% | 2  | 2  | 4   | 1.91%  |
| TPC1-p13 | (P37802) Transgelin-2 (SM22-alpha homolog)                                                                                                                                                                                                         | TAGL2_HUMAN | 22243  | 100% | 10 | 14 | 122 | 68.20% |
| TPC1-p13 | (P37837) Transaldolase (EC 2.2.1.2)                                                                                                                                                                                                                | TALDO_HUMAN | 37524  | 100% | 7  | 7  | 37  | 21.40% |
| TPC1-p13 | (P39060) Collagen alpha-1(XVIII) chain precursor [Contains: Endostatin]                                                                                                                                                                            | COIA1_HUMAN | 153809 | 100% | 3  | 3  | 5   | 4.95%  |
| TPC1-p13 | (P40121) Macrophage capping protein (Actin-regulatory protein CAP-G)                                                                                                                                                                               | CAPG_HUMAN  | 38500  | 100% | 3  | 3  | 5   | 12.90% |
| TPC1-p13 | (P40227) T-complex protein 1 subunit zeta (TCP-1-zeta) (CCT-zeta) (CCT-zeta-1) (Tcp20) (HTR3) (Acute morphine dependence-related protein 2)                                                                                                        | TCPZ_HUMAN  | 57876  | 100% | 2  | 2  | 2   | 8.68%  |
| TPC1-p13 | (P40261) Nicotinamide N-methyltransferase (EC 2.1.1.1)                                                                                                                                                                                             | NNMT_HUMAN  | 29557  | 100% | 5  | 5  | 12  | 25.40% |
| TPC1-p13 | (P40925) Malate dehydrogenase, cytoplasmic (EC 1.1.1.37) (Cytosolic malate dehydrogenase)                                                                                                                                                          | MDHC_HUMAN  | 36278  | 100% | 3  | 3  | 4   | 12.60% |
| TPC1-p13 | (P42167) Lamina-associated polypeptide 2, isoforms beta/gamma (Thymopoietin, isoforms beta/gamma) (TP beta/gamma) (Thymopoietin-related peptide isoforms beta/gamma) (TPRP isoforms beta/gamma) [Contains: Thymopoietin (TP) (Splenin); Thymopenti | LAP2B_HUMAN | 50522  | 100% | 5  | 5  | 12  | 16.10% |
| TPC1-p13 | (P42785) Lysosomal Pro-X carboxypeptidase precursor (EC 3.4.16.2) (Prolylcarboxypeptidase) (PRCP) (Proline carboxypeptidase) (Angiotensinase C) (Lysosomal carboxypeptidase C)                                                                     | PCP_HUMAN   | 55783  | 100% | 10 | 12 | 78  | 23.40% |
| TPC1-p13 | (P42892) Endothelin-converting enzyme 1 (EC 3.4.24.71) (ECE-1)                                                                                                                                                                                     | ECE1_HUMAN  | 87147  | 100% | 3  | 3  | 4   | 8.05%  |
| TPC1-p13 | (P43121) Cell surface glycoprotein MUC18 precursor (Melanoma-associated antigen MUC18) (Melanoma cell adhesion molecule) (Melanoma-associated antigen A32) (S-endo 1 endothelial-associated antigen) (Cell surface glycoprotein P1H12) (CD146 anti | MUC18_HUMAN | 71589  | 100% | 14 | 16 | 73  | 37.50% |
| TPC1-p13 | (P43251) Biotinidase precursor (EC 3.5.1.12)                                                                                                                                                                                                       | BTD_HUMAN   | 58896  | 100% | 3  | 4  | 7   | 9.18%  |

## Protein Identified Sequence Coverage in TPC-1

|          |                                                                                                                                                                                                                                                   |                 |        |      |    |    |    |        |
|----------|---------------------------------------------------------------------------------------------------------------------------------------------------------------------------------------------------------------------------------------------------|-----------------|--------|------|----|----|----|--------|
| TPC1-p13 | (P43490) Nicotinamide phosphoribosyltransferase (EC 2.4.2.12) (NAMPRTase) (Nampt) (Pre-B cell-enhancing factor) (Pre-B-cell colony-enhancing factor 1) (Visfatin)                                                                                 | NAMPT_HUMAN     | 55505  | 100% | 2  | 2  | 2  | 6.72%  |
| TPC1-p13 | (P46821) Microtubule-associated protein 1B (MAP1B) [Contains: MAP1 light chain LC1]                                                                                                                                                               | MAP1B_HUMAN     | 270602 | 100% | 2  | 2  | 3  | 1.30%  |
| TPC1-p13 | (P47755) F-actin capping protein alpha-2 subunit (CapZ alpha-2)                                                                                                                                                                                   | CAZA2_HUMAN     | 32800  | 100% | 5  | 5  | 9  | 29.10% |
| TPC1-p13 | (P47756) F-actin capping protein beta subunit (CapZ beta)                                                                                                                                                                                         | CAPZB_HUMAN     | 31202  | 100% | 4  | 4  | 11 | 17.40% |
| TPC1-p13 | (P48509) CD151 antigen (Platelet-endothelial tetraspan antigen 3) (PETA-3) (GP27) (Membrane glycoprotein SFA-1) (Tetraspanin-24) (Tspan-24)                                                                                                       | CD151_HUMAN     | 28277  | 100% | 3  | 3  | 23 | 20.20% |
| TPC1-p13 | (P48643) T-complex protein 1 subunit epsilon (TCP-1-epsilon) (CCT-epsilon)                                                                                                                                                                        | TCPE_HUMAN      | 59654  | 100% | 3  | 3  | 4  | 11.60% |
| TPC1-p13 | (P48666) Keratin, type II cytoskeletal 6C (Cytokeratin 6C) (CK 6C) (K6c keratin)                                                                                                                                                                  | K2C6C_HUMAN     | 60053  | 100% | 12 | 13 | 68 | 27.50% |
| TPC1-p13 | (P49321) Nuclear autoantigenic sperm protein (NASP)                                                                                                                                                                                               | NASP_HUMAN      | 85218  | 100% | 2  | 2  | 3  | 6.60%  |
| TPC1-p13 | (P50395) Rab GDP dissociation inhibitor beta (Rab GDI beta) (Guanosine diphosphate dissociation inhibitor 2) (GDI-2)                                                                                                                              | GDIB_HUMAN      | 50648  | 100% | 3  | 3  | 3  | 11.00% |
| TPC1-p13 | (P50502) Hsc70-interacting protein (Hip) (Suppression of tumorigenicity protein 13) (Putative tumor suppressor ST13) (Protein FAM10A1) (Progesterone receptor-associated p48 protein) (NY-REN-33 antigen)                                         | F10A1_HUMAN,F10 | 41314  | 100% | 2  | 2  | 4  | 7.32%  |
| TPC1-p13 | (P50897) Palmitoyl-protein thioesterase 1 precursor (EC 3.1.2.22) (Palmitoyl-protein hydrolase 1)                                                                                                                                                 | PPT1_HUMAN      | 34176  | 100% | 8  | 11 | 77 | 37.30% |
| TPC1-p13 | (P50991) T-complex protein 1 subunit delta (TCP-1-delta) (CCT-delta) (Stimulator of TAR RNA-binding)                                                                                                                                              | TCPD_HUMAN      | 57777  | 100% | 2  | 2  | 2  | 8.36%  |
| TPC1-p13 | (P51148) Ras-related protein Rab-5C (RAB5L) (L1880)                                                                                                                                                                                               | RAB5C_HUMAN     | 23465  | 100% | 2  | 2  | 3  | 10.60% |
| TPC1-p13 | (P51572) B-cell receptor-associated protein 31 (BCR-associated protein Bap31) (p28 Bap31) (CDM protein) (6C6-AG tumor-associated antigen) (DXS1357E)                                                                                              | BAP31_HUMAN     | 27843  | 100% | 2  | 2  | 9  | 7.35%  |
| TPC1-p13 | (P51610) Host cell factor (HCF) (HCF-1) (C1 factor) (VP16 accessory protein) (VCAF) (CFF) [Contains: HCF N-terminal chain 1; HCF N-terminal chain 2; HCF N-terminal chain 3; HCF N-terminal chain 4; HCF N-terminal chain 5; HCF N-terminal chain | HCFC1_HUMAN     | 208816 | 100% | 6  | 8  | 25 | 5.75%  |

## Protein Identified Sequence Coverage in TPC-1

|          |                                                                                                                                                                                                                                                     |             |        |      |    |    |     |        |
|----------|-----------------------------------------------------------------------------------------------------------------------------------------------------------------------------------------------------------------------------------------------------|-------------|--------|------|----|----|-----|--------|
| TPC1-p13 | (P51665) 26S proteasome non-ATPase regulatory subunit 7 (26S proteasome regulatory subunit rpn8) (26S proteasome regulatory subunit S12) (Proteasome subunit p40) (Mov34 protein homolog)                                                           | PSD7_HUMAN  | 37008  | 100% | 2  | 2  | 3   | 12.00% |
| TPC1-p13 | (P51688) N-sulphoglucosamine sulphohydrolase precursor (EC 3.10.1.1) (Sulfolglucosamine sulfamidase) (Sulphamidase)                                                                                                                                 | SPHM_HUMAN  | 56678  | 100% | 10 | 10 | 52  | 34.70% |
| TPC1-p13 | (P51690) Arylsulfatase E precursor (EC 3.1.6.-) (ASE)                                                                                                                                                                                               | ARSE_HUMAN  | 65652  | 100% | 3  | 3  | 6   | 9.51%  |
| TPC1-p13 | (P52272) Heterogeneous nuclear ribonucleoprotein M (hnRNP M)                                                                                                                                                                                        | HNRPM_HUMAN | 77368  | 100% | 4  | 4  | 7   | 7.82%  |
| TPC1-p13 | (P52565) Rho GDP-dissociation inhibitor 1 (Rho GDI 1) (Rho-GDI alpha)                                                                                                                                                                               | GDIR_HUMAN  | 23058  | 100% | 2  | 2  | 8   | 15.30% |
| TPC1-p13 | (P52907) F-actin capping protein alpha-1 subunit (CapZ alpha-1)                                                                                                                                                                                     | CAZA1_HUMAN | 32774  | 100% | 3  | 3  | 6   | 22.50% |
| TPC1-p13 | (P53367) Arfaptin-1 (ADP-ribosylation factor-interacting protein 1)                                                                                                                                                                                 | ARFP1_HUMAN | 41722  | 100% | 2  | 2  | 3   | 12.90% |
| TPC1-p13 | (P53634) Dipeptidyl-peptidase 1 precursor (EC 3.4.14.1) (Dipeptidyl-peptidase I) (DPP-I) (DPPI) (Cathepsin C) (Cathepsin J) (Dipeptidyl transferase) [Contains: Dipeptidyl-peptidase 1 exclusion domain chain (Dipeptidyl-peptidase I exclusion dom | CATC_HUMAN  | 51824  | 100% | 12 | 16 | 108 | 40.20% |
| TPC1-p13 | (P53985) Monocarboxylate transporter 1 (MCT 1)                                                                                                                                                                                                      | MOT1_HUMAN  | 53942  | 100% | 3  | 3  | 7   | 6.40%  |
| TPC1-p13 | (P54289) Dihydropyridine-sensitive L-type, calcium channel alpha-2/delta subunits precursor [Contains: L-type calcium channel alpha-2 subunit; L-type calcium channel delta subunit]                                                                | CAC2D_HUMAN | 123169 | 100% | 3  | 3  | 3   | 3.94%  |
| TPC1-p13 | (P54577) Tyrosyl-tRNA synthetase, cytoplasmic (EC 6.1.1.1) (Tyrosyl-tRNA ligase) (TyrRS)                                                                                                                                                            | SYYC_HUMAN  | 58996  | 100% | 3  | 3  | 5   | 6.07%  |
| TPC1-p13 | (P54727) UV excision repair protein RAD23 homolog B (hHR23B) (XP-C repair-complementing complex 58 kDa protein) (p58)                                                                                                                               | RD23B_HUMAN | 43153  | 100% | 4  | 4  | 6   | 21.50% |
| TPC1-p13 | (P54802) Alpha-N-acetylglucosaminidase precursor (EC 3.2.1.50) (N-acetyl-alpha-glucosaminidase) (NAG) [Contains: Alpha-N-acetylglucosaminidase 82 kDa form; Alpha-N-acetylglucosaminidase 77 kDa form]                                              | ANAG_HUMAN  | 82150  | 100% | 2  | 2  | 3   | 5.11%  |
| TPC1-p13 | (P54819) Adenylate kinase isoenzyme 2, mitochondrial (EC 2.7.4.3) (ATP-AMP transphosphorylase)                                                                                                                                                      | KAD2_HUMAN  | 26330  | 100% | 2  | 2  | 3   | 16.00% |
| TPC1-p13 | (P55145) ARMET protein precursor (Arginine-rich protein)                                                                                                                                                                                            | ARMET_HUMAN | 20240  | 100% | 3  | 4  | 12  | 17.30% |
| TPC1-p13 | (P55290) Cadherin-13 precursor (Truncated-cadherin) (T-cadherin) (T-cad) (Heart-cadherin) (H-cadherin) (P105)                                                                                                                                       | CAD13_HUMAN | 78270  | 100% | 2  | 2  | 2   | 7.01%  |
| TPC1-p13 | (P55327) Tumor protein D52 (N8 protein)                                                                                                                                                                                                             | TPD52_HUMAN | 19845  | 100% | 6  | 9  | 38  | 57.60% |



## Protein Identified Sequence Coverage in TPC-1

|          |                                                                                                                                                                                                                                                      |                |        |      |    |    |     |        |
|----------|------------------------------------------------------------------------------------------------------------------------------------------------------------------------------------------------------------------------------------------------------|----------------|--------|------|----|----|-----|--------|
| TPC1-p13 | (P56159) GDNF family receptor alpha-1 precursor (GFR-alpha-1) (GDNF receptor alpha) (GDNFR-alpha) (TGF-beta-related neurotrophic factor receptor 1) (RET ligand 1)                                                                                   | GFRA1_HUMAN    | 51439  | 100% | 8  | 8  | 15  | 26.20% |
| TPC1-p13 | (P56199) Integrin alpha-1 (Laminin and collagen receptor) (VLA-1) (CD49a antigen)                                                                                                                                                                    | ITA1_HUMAN     | 127823 | 100% | 2  | 2  | 3   | 2.52%  |
| TPC1-p13 | (P56537) Eukaryotic translation initiation factor 6 (eIF6) (B4 integrin interactor) (CAB) (p27(BBP)) (B(2)GCN homolog)                                                                                                                               | IF6_HUMAN      | 26580  | 100% | 3  | 3  | 5   | 22.90% |
| TPC1-p13 | (P59998) Actin-related protein 2/3 complex subunit 4 (ARP2/3 complex 20 kDa subunit) (p20-ARC)                                                                                                                                                       | ARPC4_HUMAN    | 19518  | 100% | 3  | 3  | 26  | 18.00% |
| TPC1-p13 | (P60033) CD81 antigen (26 kDa cell surface protein TAPA-1) (Target of the antiproliferative antibody 1) (Tetraspanin-28) (Tspan-28)                                                                                                                  | CD81_HUMAN     | 25792  | 100% | 3  | 4  | 20  | 25.00% |
| TPC1-p13 | (P60174) Triosephosphate isomerase (EC 5.3.1.1) (TIM) (Triose-phosphate isomerase)                                                                                                                                                                   | TPIS_HUMAN     | 26520  | 100% | 11 | 15 | 82  | 63.70% |
| TPC1-p13 | (P60660) Myosin light polypeptide 6 (Smooth muscle and nonmuscle myosin light chain alkali 6) (Myosin light chain alkali 3) (Myosin light chain 3) (MLC-3) (LC17)                                                                                    | MYL6_HUMAN     | 16781  | 100% | 5  | 7  | 41  | 35.30% |
| TPC1-p13 | (P60709) Actin, cytoplasmic 1 (Beta-actin)                                                                                                                                                                                                           | ACTB_HUMAN,ACT | 41776  | 100% | 13 | 20 | 184 | 54.10% |
| TPC1-p13 | (P60866) 40S ribosomal protein S20                                                                                                                                                                                                                   | RS20_HUMAN     | 13355  | 100% | 3  | 4  | 19  | 22.70% |
| TPC1-p13 | (P61019) Ras-related protein Rab-2A                                                                                                                                                                                                                  | RAB2A_HUMAN    | 23528  | 100% | 3  | 3  | 5   | 19.30% |
| TPC1-p13 | (P61088) Ubiquitin-conjugating enzyme E2 N (EC 6.3.2.19) (Ubiquitin-protein ligase N) (Ubiquitin carrier protein N) (Ubc13) (Bendless-like ubiquitin-conjugating enzyme)                                                                             | UBE2N_HUMAN    | 17121  | 100% | 3  | 3  | 4   | 23.70% |
| TPC1-p13 | (P61289) Proteasome activator complex subunit 3 (Proteasome activator 28-gamma subunit) (PA28gamma) (PA28g) (Activator of multicatalytic protease subunit 3) (11S regulator complex gamma subunit) (REG-gamma) (Ki nuclear autoantigen)              | PSME3_HUMAN    | 29489  | 100% | 3  | 3  | 15  | 15.40% |
| TPC1-p13 | (P61457) Pterin-4-alpha-carbinolamine dehydratase (EC 4.2.1.96) (PHS) (4-alpha-hydroxy-tetrahydropterin dehydratase) (Phenylalanine hydroxylase-stimulating protein) (Pterin carbinolamine dehydratase) (PCD) (Dimerization cofactor of hepatocyte n | PHS_HUMAN      | 11851  | 100% | 2  | 2  | 10  | 25.20% |
| TPC1-p13 | (P61586) Transforming protein RhoA precursor (H12)                                                                                                                                                                                                   | RHOA_HUMAN     | 21750  | 100% | 2  | 2  | 2   | 28.00% |
| TPC1-p13 | (P61758) Prefoldin subunit 3 (Von Hippel-Lindau-binding protein 1) (VHL-binding protein 1) (VBP-1) (HIBBJ46)                                                                                                                                         | PFD3_HUMAN     | 22609  | 100% | 5  | 5  | 8   | 26.90% |
| TPC1-p13 | (P61916) Epididymal secretory protein E1 precursor (Niemann-Pick disease type C2 protein) (hE1)                                                                                                                                                      | NPC2_HUMAN     | 16552  | 100% | 8  | 10 | 165 | 68.20% |
| TPC1-p13 | (P62158) Calmodulin (CaM)                                                                                                                                                                                                                            | CALM_HUMAN     | 16689  | 100% | 2  | 2  | 4   | 35.80% |

Protein Identified Sequence Coverage in TPC-1

|          |                                                                                                                                                                                                                                                    |                |       |      |    |    |     |        |
|----------|----------------------------------------------------------------------------------------------------------------------------------------------------------------------------------------------------------------------------------------------------|----------------|-------|------|----|----|-----|--------|
| TPC1-p13 | (P62166) Neuronal calcium sensor 1 (NCS-1) (Frequenin homolog) (Frequenin-like protein) (Frequenin-like ubiquitous protein)                                                                                                                        | NCS1_HUMAN     | 21730 | 100% | 2  | 2  | 3   | 14.80% |
| TPC1-p13 | (P62263) 40S ribosomal protein S14                                                                                                                                                                                                                 | RS14_HUMAN     | 16124 | 100% | 2  | 2  | 11  | 22.70% |
| TPC1-p13 | (P62304) Small nuclear ribonucleoprotein E (snRNP-E) (Sm protein E) (Sm-E) (SmE)                                                                                                                                                                   | RUXE_HUMAN     | 10786 | 100% | 2  | 2  | 12  | 25.00% |
| TPC1-p13 | (P62805) Histone H4                                                                                                                                                                                                                                | H4_HUMAN       | 11219 | 100% | 5  | 5  | 41  | 51.00% |
| TPC1-p13 | (P62807) Histone H2B.a/g/h/k/l (H2B.1 A) (H2B/a) (H2B/g) (H2B/h) (H2B/k) (H2B/l)                                                                                                                                                                   | H2BA_HUMAN,H2B | 13795 | 100% | 3  | 3  | 63  | 27.20% |
| TPC1-p13 | (P62888) 60S ribosomal protein L30                                                                                                                                                                                                                 | RL30_HUMAN     | 12636 | 100% | 2  | 2  | 6   | 24.60% |
| TPC1-p13 | (P62937) Peptidyl-prolyl cis-trans isomerase A (EC 5.2.1.8) (PPIase A) (Rotamase A) (Cyclophilin A) (Cyclosporin A-binding protein)                                                                                                                | PPIA_HUMAN     | 17864 | 100% | 10 | 12 | 85  | 67.10% |
| TPC1-p13 | (P62988) Ubiquitin                                                                                                                                                                                                                                 | UBIQ_HUMAN     | 8547  | 100% | 3  | 3  | 23  | 44.70% |
| TPC1-p13 | (P63104) 14-3-3 protein zeta/delta (Protein kinase C inhibitor protein 1) (KCIP-1)                                                                                                                                                                 | 1433Z_HUMAN    | 27728 | 100% | 4  | 5  | 28  | 29.80% |
| TPC1-p13 | (P63241) Eukaryotic translation initiation factor 5A-1 (eIF-5A-1) (eIF-5A1) (Eukaryotic initiation factor 5A isoform 1) (eIF-5A) (eIF-4D) (Rev-binding factor)                                                                                     | IF5A1_HUMAN    | 16684 | 100% | 3  | 4  | 12  | 35.30% |
| TPC1-p13 | (P67809) Nuclease sensitive element-binding protein 1 (Y-box-binding protein 1) (Y-box transcription factor) (YB-1) (CCAAT-binding transcription factor I subunit A) (CBF-A) (Enhancer factor I subunit A) (EFI-A) (DNA-binding protein B) (DBPB)  | YBOX1_HUMAN    | 35775 | 100% | 2  | 2  | 3   | 11.10% |
| TPC1-p13 | (P67936) Tropomyosin alpha-4 chain (Tropomyosin-4) (TM30p1)                                                                                                                                                                                        | TPM4_HUMAN     | 28373 | 100% | 8  | 9  | 41  | 32.00% |
| TPC1-p13 | (P68104) Elongation factor 1-alpha 1 (EF-1-alpha-1) (Elongation factor 1 A-1) (eEF1A-1) (Elongation factor Tu) (EF-Tu)                                                                                                                             | EF1A1_HUMAN    | 50123 | 100% | 13 | 20 | 167 | 47.60% |
| TPC1-p13 | (P68363) Tubulin alpha-ubiquitous chain (Alpha-tubulin ubiquitous) (Tubulin K-alpha-1)                                                                                                                                                             | TBAK_HUMAN     | 50134 | 100% | 7  | 8  | 28  | 25.10% |
| TPC1-p13 | (P68431) Histone H3.1 (H3/a) (H3/b) (H3/c) (H3/d) (H3/f) (H3/h) (H3/i) (H3/j) (H3/k) (H3/l)                                                                                                                                                        | H31_HUMAN      | 15256 | 100% | 2  | 2  | 2   | 28.90% |
| TPC1-p13 | (P78310) Coxsackievirus and adenovirus receptor precursor (Coxsackievirus B-adenovirus receptor) (hCAR) (CVB3-binding protein) (HCVADR)                                                                                                            | CXAR_HUMAN     | 40013 | 100% | 2  | 2  | 7   | 7.12%  |
| TPC1-p13 | (P78324) Tyrosine-protein phosphatase non-receptor type substrate 1 precursor (SHP substrate 1) (SHPS-1) (Inhibitory receptor SHPS-1) (Signal-regulatory protein alpha-1) (Sirp-alpha-1) (Sirp-alpha-2) (Sirp-alpha-3) (MyD-1 antigen) (Brain Ig-I | SHPS1_HUMAN    | 54793 | 100% | 6  | 6  | 16  | 18.10% |
| TPC1-p13 | (P78417) Glutathione transferase omega-1 (EC 2.5.1.18) (GSTO 1-1)                                                                                                                                                                                  | GSTO1_HUMAN    | 27549 | 100% | 2  | 2  | 4   | 18.30% |

## Protein Identified Sequence Coverage in TPC-1

|          |                                                                                                                                                                                                                                                     |                |        |      |    |    |    |        |
|----------|-----------------------------------------------------------------------------------------------------------------------------------------------------------------------------------------------------------------------------------------------------|----------------|--------|------|----|----|----|--------|
| TPC1-p13 | (P80723) Brain acid soluble protein 1 (BASP1 protein) (Neuronal axonal membrane protein NAP-22) (22 kDa neuronal tissue-enriched acidic protein)                                                                                                    | BASP_HUMAN     | 22544  | 100% | 3  | 3  | 14 | 42.00% |
| TPC1-p13 | (P84077) ADP-ribosylation factor 1                                                                                                                                                                                                                  | ARF1_HUMAN,ARF | 20453  | 100% | 4  | 4  | 14 | 33.90% |
| TPC1-p13 | (Q00688) FK506-binding protein 3 (EC 5.2.1.8) (Peptidyl-prolyl cis-trans isomerase) (PPIase) (Rotamase) (25 kDa FKBP) (FKBP-25) (Rapamycin-selective 25 kDa immunophilin)                                                                           | FKBP3_HUMAN    | 25159  | 100% | 2  | 2  | 7  | 11.60% |
| TPC1-p13 | (Q01082) Spectrin beta chain, brain 1 (Spectrin, non-erythroid beta chain 1) (Beta-II spectrin) (Fodrin beta chain)                                                                                                                                 | SPTB2_HUMAN    | 274617 | 100% | 11 | 11 | 18 | 7.95%  |
| TPC1-p13 | (Q01105) Protein SET (Phosphatase 2A inhibitor I2PP2A) (I-2PP2A) (Template-activating factor I) (TAF-I) (HLA-DR-associated protein II) (PHAPII) (Inhibitor of granzyme A-activated DNase) (IGAAD)                                                   | SET_HUMAN      | 33471  | 100% | 3  | 3  | 6  | 12.10% |
| TPC1-p13 | (Q01459) Di-N-acetylchitobiase precursor (EC 3.2.1.-)                                                                                                                                                                                               | DIAC_HUMAN     | 43743  | 100% | 7  | 9  | 20 | 28.60% |
| TPC1-p13 | (Q01518) Adenylyl cyclase-associated protein 1 (CAP 1)                                                                                                                                                                                              | CAP1_HUMAN     | 51524  | 100% | 8  | 11 | 60 | 35.00% |
| TPC1-p13 | (Q01995) Transgelin (Smooth muscle protein 22-alpha) (SM22-alpha) (WS3-10) (22 kDa actin-binding protein)                                                                                                                                           | TAGL_HUMAN     | 22462  | 100% | 5  | 5  | 24 | 28.00% |
| TPC1-p13 | (Q02809) Procollagen-lysine,2-oxoglutarate 5-dioxygenase 1 precursor (EC 1.14.11.4) (Lysyl hydroxylase 1) (LH1)                                                                                                                                     | PLOD1_HUMAN    | 83535  | 100% | 6  | 6  | 20 | 11.10% |
| TPC1-p13 | (Q03405) Urokinase plasminogen activator surface receptor precursor (uPAR) (U-PAR) (Monocyte activation antigen Mo3) (CD87 antigen)                                                                                                                 | UPAR_HUMAN     | 36959  | 100% | 4  | 5  | 8  | 20.00% |
| TPC1-p13 | (Q05682) Caldesmon (CDM)                                                                                                                                                                                                                            | CALD1_HUMAN    | 93233  | 100% | 3  | 3  | 5  | 7.06%  |
| TPC1-p13 | (Q06323) Proteasome activator complex subunit 1 (Proteasome activator 28-alpha subunit) (PA28alpha) (PA28a) (Activator of multicatalytic protease subunit 1) (11S regulator complex alpha subunit) (REG-alpha) (Interferon gamma up-regulated I-51) | PSME1_HUMAN    | 28706  | 100% | 9  | 10 | 58 | 37.30% |
| TPC1-p13 | (Q06830) Peroxiredoxin-1 (EC 1.11.1.15) (Thioredoxin peroxidase 2) (Thioredoxin-dependent peroxide reductase 2) (Proliferation-associated protein PAG) (Natural killer cell-enhancing factor A) (NKEF-A)                                            | PRDX1_HUMAN    | 22093  | 100% | 11 | 11 | 83 | 55.30% |
| TPC1-p13 | (Q07812) Apoptosis regulator BAX, membrane isoform alpha                                                                                                                                                                                            | BAXA_HUMAN,BAX | 24203  | 100% | 2  | 2  | 3  | 11.90% |
| TPC1-p13 | (Q08380) Galectin-3-binding protein precursor (Lectin galactoside-binding soluble 3-binding protein) (Mac-2-binding protein) (Mac-2 BP) (MAC2BP) (Tumor-associated antigen 90K)                                                                     | LG3BP_HUMAN    | 65314  | 100% | 10 | 15 | 60 | 26.00% |

Protein Identified Sequence Coverage in TPC-1

|          |                                                                                                                                                                                                                                      |             |        |      |    |    |     |        |
|----------|--------------------------------------------------------------------------------------------------------------------------------------------------------------------------------------------------------------------------------------|-------------|--------|------|----|----|-----|--------|
| TPC1-p13 | (Q09666) Neuroblast differentiation-associated protein AHNK (Desmoyokin) (Fragments)                                                                                                                                                 | AHNK_HUMAN  | 312479 | 100% | 70 | 81 | 307 | 37.50% |
| TPC1-p13 | (Q12841) Follistatin-related protein 1 precursor (Follistatin-like 1)                                                                                                                                                                | FSTL1_HUMAN | 34967  | 100% | 7  | 7  | 28  | 24.00% |
| TPC1-p13 | (Q13126) S-methyl-5-thioadenosine phosphorylase (EC 2.4.2.28) (5'-methylthioadenosine phosphorylase) (MTA phosphorylase) (MTAPase)                                                                                                   | MTAP_HUMAN  | 31232  | 100% | 4  | 4  | 10  | 27.20% |
| TPC1-p13 | (Q13308) Tyrosine-protein kinase-like 7 precursor (Colon carcinoma kinase 4) (CCK-4)                                                                                                                                                 | PTK7_HUMAN  | 118243 | 100% | 3  | 3  | 6   | 5.70%  |
| TPC1-p13 | (Q13510) Acid ceramidase precursor (EC 3.5.1.23) (Acylsphingosine deacylase) (N-acylsphingosine amidohydrolase) (AC) (Putative 32 kDa heart protein) (PHP32) [Contains: Acid ceramidase alpha subunit; Acid ceramidase beta subunit] | ASAH1_HUMAN | 44633  | 100% | 11 | 11 | 52  | 33.70% |
| TPC1-p13 | (Q13561) Dynactin subunit 2 (Dynactin complex 50 kDa subunit) (50 kDa dynein-associated polypeptide) (p50 dynamitin) (DCTN-50)                                                                                                       | DCTN2_HUMAN | 44083  | 100% | 8  | 8  | 28  | 28.70% |
| TPC1-p13 | (Q13641) Trophoblast glycoprotein precursor (5T4 oncofetal trophoblast glycoprotein) (5T4 oncotrophoblast glycoprotein) (5T4 oncofetal antigen) (M6P1)                                                                               | TPBG_HUMAN  | 46015  | 100% | 3  | 4  | 8   | 15.00% |
| TPC1-p13 | (Q13740) CD166 antigen precursor (Activated leukocyte-cell adhesion molecule) (ALCAM)                                                                                                                                                | CD166_HUMAN | 65116  | 100% | 28 | 40 | 235 | 62.60% |
| TPC1-p13 | (Q13751) Laminin beta-3 chain precursor (Laminin 5 beta 3) (Laminin B1k chain) (Kalinin B1 chain)                                                                                                                                    | LAMB3_HUMAN | 129553 | 100% | 2  | 3  | 13  | 3.24%  |
| TPC1-p13 | (Q13813) Spectrin alpha chain, brain (Spectrin, non-erythroid alpha chain) (Alpha-II spectrin) (Fodrin alpha chain)                                                                                                                  | SPTA2_HUMAN | 284525 | 100% | 6  | 7  | 9   | 5.02%  |
| TPC1-p13 | (Q14108) Lysosome membrane protein 2 (Lysosome membrane protein II) (LIMP II) (Scavenger receptor class B member 2) (85 kDa lysosomal membrane sialoglycoprotein) (LGP85) (CD36 antigen-like 2)                                      | SCRB2_HUMAN | 54143  | 100% | 2  | 2  | 2   | 6.50%  |
| TPC1-p13 | (Q14126) Desmoglein-2 precursor (HDGC)                                                                                                                                                                                               | DSG2_HUMAN  | 122367 | 100% | 2  | 2  | 2   | 4.12%  |
| TPC1-p13 | (Q14195) Dihydropyrimidinase-related protein 3 (DRP-3) (Unc-33-like phosphoprotein) (ULIP protein) (Collapsin response mediator protein 4) (CRMP-4)                                                                                  | DPYL3_HUMAN | 61946  | 100% | 3  | 3  | 4   | 13.20% |
| TPC1-p13 | (Q14764) Major vault protein (MVP) (Lung resistance related protein)                                                                                                                                                                 | MVP_HUMAN   | 99177  | 100% | 3  | 3  | 3   | 7.51%  |
| TPC1-p13 | (Q15084) Protein disulfide-isomerase A6 precursor (EC 5.3.4.1) (Protein disulfide isomerase P5) (Thioredoxin domain-containing protein 7)                                                                                            | PDIA6_HUMAN | 48104  | 100% | 19 | 26 | 287 | 48.00% |

## Protein Identified Sequence Coverage in TPC-1

|          |                                                                                                                                                                                                   |                 |       |      |    |    |     |        |
|----------|---------------------------------------------------------------------------------------------------------------------------------------------------------------------------------------------------|-----------------|-------|------|----|----|-----|--------|
| TPC1-p13 | (Q15181) Inorganic pyrophosphatase (EC 3.6.1.1) (Pyrophosphate phospho-hydrolase) (PPase)                                                                                                         | IPYR_HUMAN      | 32643 | 100% | 4  | 4  | 6   | 21.50% |
| TPC1-p13 | (Q15365) Poly(rC)-binding protein 1 (Alpha-CP1) (hnRNP-E1) (Nucleic acid-binding protein SUB2.3)                                                                                                  | PCBP1_HUMAN     | 37480 | 100% | 4  | 5  | 21  | 22.80% |
| TPC1-p13 | (Q15366) Poly(rC)-binding protein 2 (Alpha-CP2) (hnRNP-E2)                                                                                                                                        | PCBP2_HUMAN     | 38563 | 100% | 3  | 3  | 13  | 20.30% |
| TPC1-p13 | (Q15417) Calponin-3 (Calponin, acidic isoform)                                                                                                                                                    | CNN3_HUMAN      | 36397 | 100% | 4  | 4  | 9   | 18.80% |
| TPC1-p13 | (Q15582) Transforming growth factor-beta-induced protein ig-h3 precursor (Beta ig-h3) (Kerato-epithelin) (RGD-containing collagen-associated protein) (RGD-CAP)                                   | BGH3_HUMAN      | 74665 | 100% | 6  | 6  | 14  | 16.40% |
| TPC1-p13 | (Q15758) Neutral amino acid transporter B(0) (ATB(0)) (Sodium-dependent neutral amino acid transporter type 2) (RD114/simian type D retrovirus receptor) (Baboon M7 virus receptor)               | AAAT_HUMAN      | 56582 | 100% | 3  | 3  | 8   | 8.50%  |
| TPC1-p13 | (Q16270) Insulin-like growth factor-binding protein 7 precursor (IGFBP-7) (IBP-7) (IGF-binding protein 7) (MAC25 protein) (Prostacyclin-stimulating factor) (PGI2-stimulating factor) (IGFBP-rP1) | IBP7_HUMAN      | 29112 | 100% | 10 | 14 | 116 | 39.40% |
| TPC1-p13 | (Q16881) Thioredoxin reductase 1, cytoplasmic precursor (EC 1.8.1.9) (TR) (TR1)                                                                                                                   | TRXR1_HUMAN     | 54689 | 100% | 3  | 3  | 8   | 19.80% |
| TPC1-p13 | (Q5ZPR3) CD276 antigen precursor (Costimulatory molecule) (B7 homolog 3) (B7-H3) (4Ig-B7-H3)                                                                                                      | CD276_HUMAN     | 57216 | 100% | 7  | 9  | 21  | 24.90% |
| TPC1-p13 | (Q6EMK4) Vasorin precursor (Protein Slit-like 2)                                                                                                                                                  | VASN_HUMAN      | 71696 | 100% | 2  | 2  | 4   | 6.54%  |
| TPC1-p13 | (Q6FI13) Histone H2A type 2-A (H2A.2)                                                                                                                                                             | H2A2A_HUMAN,H2A | 13840 | 100% | 2  | 2  | 11  | 50.00% |
| TPC1-p13 | (Q71UI9) Histone H2AV (H2A.F/Z)                                                                                                                                                                   | H2AV_HUMAN,H2A  | 13360 | 100% | 2  | 2  | 16  | 12.60% |
| TPC1-p13 | (Q7Z3B1) Neuronal growth regulator 1 precursor                                                                                                                                                    | NEGR1_HUMAN     | 38701 | 100% | 2  | 2  | 2   | 17.20% |
| TPC1-p13 | (Q86YB8) ERO1-like protein beta precursor (EC 1.8.4.-) (ERO1-Lbeta) (Oxidoreductin-1-Lbeta) (Endoplasmic oxidoreductin-1-like protein B)                                                          | ERO1B_HUMAN     | 53511 | 100% | 3  | 3  | 5   | 10.70% |
| TPC1-p13 | (Q8N2G4) Ly6/PLAUR domain-containing protein 1 precursor                                                                                                                                          | LYPD1_HUMAN     | 15222 | 100% | 2  | 2  | 9   | 24.80% |
| TPC1-p13 | (Q8NBJ7) Sulfatase-modifying factor 2 precursor (C-alpha-formylglycine-generating enzyme 2)                                                                                                       | SUMF2_HUMAN     | 33839 | 100% | 9  | 12 | 74  | 36.20% |
| TPC1-p13 | (Q8NBK3) Sulfatase-modifying factor 1 precursor (C-alpha-formylglycine-generating enzyme 1)                                                                                                       | SUMF1_HUMAN     | 40538 | 100% | 3  | 3  | 15  | 12.60% |
| TPC1-p13 | (Q8NBS9) Thioredoxin domain-containing protein 5 precursor (Thioredoxin-like protein p46) (Endoplasmic reticulum protein ERp46)                                                                   | TXND5_HUMAN     | 47611 | 100% | 7  | 7  | 24  | 22.70% |
| TPC1-p13 | (Q8NCC3) 1-O-acylceramide synthase precursor (EC 2.3.1.-) (ACS) (Lysosomal phospholipase A2) (Lysophospholipase 3) (LPLA2) (LCAT-like lysophospholipase) (LLPL)                                   | LYPA3_HUMAN     | 46641 | 100% | 10 | 11 | 36  | 37.10% |

## Protein Identified Sequence Coverage in TPC-1

|          |                                                                                                                                                                                                                  |             |       |      |    |    |     |        |
|----------|------------------------------------------------------------------------------------------------------------------------------------------------------------------------------------------------------------------|-------------|-------|------|----|----|-----|--------|
| TPC1-p13 | (Q8WUM4) Programmed cell death 6-interacting protein (PDCD6-interacting protein) (ALG-2-interacting protein 1) (Hp95)                                                                                            | PDC6I_HUMAN | 96007 | 100% | 2  | 2  | 4   | 3.80%  |
| TPC1-p13 | (Q8WUT4) Protein C20orf75 precursor                                                                                                                                                                              | CT075_HUMAN | 78826 | 100% | 7  | 8  | 32  | 18.60% |
| TPC1-p13 | (Q92484) Acid sphingomyelinase-like phosphodiesterase 3a precursor (EC 3.1.4.-) (ASM-like phosphodiesterase 3a)                                                                                                  | ASM3A_HUMAN | 51244 | 100% | 2  | 2  | 5   | 8.39%  |
| TPC1-p13 | (Q92692) Poliovirus receptor-related protein 2 precursor (Herpes virus entry mediator B) (HveB) (Nectin-2) (CD112 antigen)                                                                                       | PVRL2_HUMAN | 57724 | 100% | 2  | 2  | 2   | 10.40% |
| TPC1-p13 | (Q92820) Gamma-glutamyl hydrolase precursor (EC 3.4.19.9) (Gamma-Glu-X carboxypeptidase) (Conjugase) (GH)                                                                                                        | GGH_HUMAN   | 35948 | 100% | 12 | 16 | 137 | 44.70% |
| TPC1-p13 | (Q969H8) Protein C19orf10 precursor (Stromal cell-derived growth factor SF20) (Interleukin-25) (IL-25)                                                                                                           | CS010_HUMAN | 18777 | 100% | 3  | 4  | 14  | 20.80% |
| TPC1-p13 | (Q96AY3) FK506-binding protein 10 precursor (EC 5.2.1.8) (Peptidyl-prolyl cis-trans isomerase) (PPIase) (Rotamase) (65 kDa FK506-binding protein) (FKBP65) (Immunophilin FKBP65)                                 | FKB10_HUMAN | 64228 | 100% | 17 | 18 | 76  | 46.70% |
| TPC1-p13 | (Q96C90) Protein phosphatase 1 regulatory subunit 14B (Phospholipase C beta 3 neighbouring gene protein)                                                                                                         | PP14B_HUMAN | 15894 | 100% | 4  | 5  | 9   | 58.50% |
| TPC1-p13 | (Q96D42) Hepatitis A virus cellular receptor 1 precursor (HAVcr-1) (T cell immunoglobulin and mucin domain-containing protein 1) (TIMD-1) (T cell membrane protein 1) (TIM-1) (TIM)                              | TIMD1_HUMAN | 38701 | 100% | 3  | 4  | 18  | 19.20% |
| TPC1-p13 | (Q96FQ6) Protein S100-A16 (S100 calcium-binding protein A16) (Protein S100F)                                                                                                                                     | S10AG_HUMAN | 11784 | 100% | 4  | 4  | 18  | 52.40% |
| TPC1-p13 | (Q96HE7) ERO1-like protein alpha precursor (EC 1.8.4.-) (ERO1-Lalpha) (Oxidoreductin-1-Lalpha) (Endoplasmic oxidoreductin-1-like protein) (ERO1-L)                                                               | ERO1A_HUMAN | 54377 | 100% | 21 | 28 | 189 | 63.00% |
| TPC1-p13 | (Q96PD2) Discoidin, CUB and LCCL domain-containing protein 2 precursor (Endothelial and smooth muscle cell-derived neuropilin-like protein) (CUB, LCCL and coagulation factor V/VIII-homology domains protein 1) | DCBD2_HUMAN | 85018 | 100% | 5  | 5  | 10  | 12.00% |
| TPC1-p13 | (Q99439) Calponin-2 (Calponin H2, smooth muscle) (Neutral calponin)                                                                                                                                              | CNN2_HUMAN  | 33548 | 100% | 2  | 2  | 4   | 10.10% |
| TPC1-p13 | (Q99471) Prefoldin subunit 5 (C-myc-binding protein Mm-1) (Myc modulator 1)                                                                                                                                      | PFD5_HUMAN  | 17310 | 100% | 3  | 4  | 13  | 33.80% |
| TPC1-p13 | (Q99497) Protein DJ-1 (Oncogene DJ1)                                                                                                                                                                             | PARK7_HUMAN | 19873 | 100% | 2  | 2  | 11  | 21.70% |
| TPC1-p13 | (Q99519) Sialidase-1 precursor (EC 3.2.1.18) (Lysosomal sialidase) (N-acetyl-alpha-neuraminidase 1) (Acetylneuraminyl hydrolase) (G9 sialidase)                                                                  | NEUR1_HUMAN | 45449 | 100% | 10 | 11 | 52  | 34.00% |

## Protein Identified Sequence Coverage in TPC-1

|          |                                                                                                                                                                                                                              |             |        |      |   |    |     |        |
|----------|------------------------------------------------------------------------------------------------------------------------------------------------------------------------------------------------------------------------------|-------------|--------|------|---|----|-----|--------|
| TPC1-p13 | (Q99538) Legumain precursor (EC 3.4.22.34) (Asparaginyl endopeptidase) (Protease, cysteine 1)                                                                                                                                | LGMN_HUMAN  | 49393  | 100% | 4 | 4  | 24  | 12.20% |
| TPC1-p13 | (Q99715) Collagen alpha-1(XII) chain precursor                                                                                                                                                                               | COCA1_HUMAN | 333174 | 100% | 2 | 2  | 2   | 1.27%  |
| TPC1-p13 | (Q9BUL8) Programmed cell death protein 10 (TF-1 cell apoptosis-related protein 15) (Cerebral cavernous malformations 3 protein)                                                                                              | PDC10_HUMAN | 24685  | 100% | 2 | 2  | 3   | 10.40% |
| TPC1-p13 | (Q9H5V8) CUB domain-containing protein 1 precursor (Transmembrane and associated with src kinases) (Membrane glycoprotein gp140) (Subtractive immunization M plus HEP3 associated 135 kDa protein) (SIMA135) (CD318 antigen) | CDCP1_HUMAN | 92858  | 100% | 2 | 2  | 2   | 3.23%  |
| TPC1-p13 | (Q9HAT2) Sialate O-acetyltransferase precursor (EC 3.1.1.53) (Sialic acid-specific 9-O-acetyltransferase) (H-Lse)                                                                                                            | SIAE_HUMAN  | 58297  | 100% | 7 | 8  | 29  | 17.80% |
| TPC1-p13 | (Q9HB40) Retinoid-inducible serine carboxypeptidase precursor (EC 3.4.16.-) (Serine carboxypeptidase 1)                                                                                                                      | RISC_HUMAN  | 50814  | 100% | 2 | 2  | 6   | 5.53%  |
| TPC1-p13 | (Q9HDC9) Adipocyte plasma membrane-associated protein (BSCv protein)                                                                                                                                                         | APMAP_HUMAN | 46464  | 99%  | 2 | 2  | 2   | 9.86%  |
| TPC1-p13 | (Q9NQC3) Reticulon-4 (Neurite outgrowth inhibitor) (Nogo protein) (Foccen) (Neuroendocrine-specific protein) (NSP) (Neuroendocrine-specific protein C homolog) (RTN-x) (Reticulon-5)                                         | RTN4_HUMAN  | 129917 | 100% | 2 | 2  | 10  | 4.03%  |
| TPC1-p13 | (Q9NVD7) Alpha-parvin (Calponin-like integrin-linked kinase-binding protein) (CH-ILKBP)                                                                                                                                      | PARVA_HUMAN | 42227  | 100% | 2 | 2  | 3   | 7.53%  |
| TPC1-p13 | (Q9NYL9) Tropomodulin-3 (Ubiquitous tropomodulin) (U-Tmod)                                                                                                                                                                   | TMOD3_HUMAN | 39578  | 100% | 5 | 5  | 9   | 30.70% |
| TPC1-p13 | (Q9P2B2) Prostaglandin F2 receptor negative regulator precursor (Prostaglandin F2-alpha receptor regulatory protein) (Prostaglandin F2-alpha receptor-associated protein) (CD9 partner 1) (CD9P-1) (CD315 antigen)           | FPRP_HUMAN  | 98538  | 100% | 4 | 4  | 8   | 7.51%  |
| TPC1-p13 | (Q9P2E9) Ribosome-binding protein 1 (Ribosome receptor protein) (180 kDa ribosome receptor homolog) (ES/130-related protein)                                                                                                 | RRBP1_HUMAN | 152453 | 100% | 8 | 8  | 16  | 8.65%  |
| TPC1-p13 | (Q9UBG0) Macrophage mannose receptor 2 precursor (Urokinase receptor-associated protein) (Endocytic receptor 180) (CD280 antigen)                                                                                            | MRC2_HUMAN  | 166637 | 100% | 8 | 8  | 12  | 10.80% |
| TPC1-p13 | (Q9UBR2) Cathepsin Z precursor (EC 3.4.22.-) (Cathepsin X) (Cathepsin P)                                                                                                                                                     | CATZ_HUMAN  | 33850  | 100% | 9 | 12 | 263 | 41.30% |
| TPC1-p13 | (Q9UHG3) Prenylcysteine oxidase precursor (EC 1.8.3.5) (PCL1)                                                                                                                                                                | PCYOX_HUMAN | 56595  | 100% | 5 | 5  | 9   | 16.40% |

## Protein Identified Sequence Coverage in TPC-1

|          |                                                                                                                                                                                                            |             |        |      |    |    |     |        |
|----------|------------------------------------------------------------------------------------------------------------------------------------------------------------------------------------------------------------|-------------|--------|------|----|----|-----|--------|
| TPC1-p13 | (Q9UHL4) Dipeptidyl-peptidase 2 precursor (EC 3.4.14.2) (Dipeptidyl-peptidase II) (DPP II) (Dipeptidyl aminopeptidase II) (Quiescent cell proline dipeptidase) (Dipeptidyl peptidase 7)                    | DPP2_HUMAN  | 54311  | 100% | 14 | 19 | 132 | 43.30% |
| TPC1-p13 | (Q9UHV9) Prefoldin subunit 2                                                                                                                                                                               | PFD2_HUMAN  | 16630  | 100% | 4  | 5  | 33  | 35.10% |
| TPC1-p13 | (Q9UIJ7) GTP:AMP phosphotransferase mitochondrial (EC 2.7.4.10) (Adenylate kinase 3) (AK3) (Adenylate kinase 3 alpha-like 1)                                                                               | KAD3_HUMAN  | 25417  | 100% | 5  | 5  | 8   | 27.90% |
| TPC1-p13 | (Q9UL46) Proteasome activator complex subunit 2 (Proteasome activator 28-beta subunit) (PA28beta) (PA28b) (Activator of multicatalytic protease subunit 2) (11S regulator complex beta subunit) (REG-beta) | PSME2_HUMAN | 27213  | 100% | 5  | 7  | 15  | 27.70% |
| TPC1-p13 | (Q9UM22) Mammalian ependymin-related protein 1 precursor (MERP-1) (UCC1 protein)                                                                                                                           | EPDR1_HUMAN | 25420  | 100% | 5  | 5  | 56  | 23.70% |
| TPC1-p13 | (Q9UMR5) Palmitoyl-protein thioesterase 2 precursor (EC 3.1.2.22) (Palmitoyl-protein hydrolase 2) (PPT-2) (G14)                                                                                            | PPT2_HUMAN  | 34291  | 100% | 5  | 6  | 10  | 31.10% |
| TPC1-p13 | (Q9UMX5) Neudesin precursor (Neuron-derived neurotrophic factor) (Secreted protein of unknown function) (SPUF protein)                                                                                     | NENF_HUMAN  | 18839  | 100% | 4  | 5  | 12  | 40.70% |
| TPC1-p13 | (Q9UNN8) Endothelial protein C receptor precursor (Endothelial cell protein C receptor) (Activated protein C receptor) (APC receptor) (CD201 antigen)                                                      | EPCR_HUMAN  | 26653  | 100% | 2  | 2  | 7   | 12.60% |
| TPC1-p13 | (Q9UNW1) Multiple inositol polyphosphate phosphatase 1 precursor (EC 3.1.3.62) (Inositol (1,3,4,5)-tetrakisphosphate 3-phosphatase) (Ins(1,3,4,5)P(4) 3-phosphatase)                                       | MINP1_HUMAN | 55035  | 100% | 3  | 4  | 4   | 10.70% |
| TPC1-p13 | (Q9Y224) Protein C14orf166                                                                                                                                                                                 | CN166_HUMAN | 28051  | 100% | 5  | 7  | 20  | 30.70% |
| TPC1-p13 | (Q9Y2B0) MIR-interacting saposin-like protein precursor (Transmembrane protein 4) (Putative secreted protein ZSIG9)                                                                                        | MSAP_HUMAN  | 20635  | 100% | 9  | 12 | 61  | 65.90% |
| TPC1-p13 | (Q9Y2E5) Epididymis-specific alpha-mannosidase precursor (EC 3.2.1.24) (Mannosidase alpha class 2B member 2)                                                                                               | MA2B2_HUMAN | 113870 | 100% | 8  | 11 | 39  | 14.30% |
| TPC1-p13 | (Q9Y3B3) Transmembrane emp24 domain-containing protein 7 precursor                                                                                                                                         | TMED7_HUMAN | 25154  | 100% | 2  | 2  | 2   | 14.70% |
| TPC1-p13 | (Q9Y490) Talin-1                                                                                                                                                                                           | TLN1_HUMAN  | 269747 | 100% | 8  | 10 | 17  | 7.20%  |
| TPC1-p13 | (Q9Y4L1) 150 kDa oxygen-regulated protein precursor (Orp150) (Hypoxia up-regulated 1)                                                                                                                      | OXR1_HUMAN  | 111319 | 100% | 26 | 34 | 176 | 42.30% |
| TPC1-p13 | (Q9Y624) Junctional adhesion molecule A precursor (JAM-A) (Junctional adhesion molecule 1) (JAM-1) (Platelet adhesion molecule 1) (PAM-1) (Platelet F11 receptor) (CD321 antigen)                          | JAM1_HUMAN  | 32565  | 100% | 4  | 4  | 13  | 21.70% |
| TPC1-p13 | (Q9Y680) FK506-binding protein 7 precursor (EC 5.2.1.8) (Peptidyl-prolyl cis-trans isomerase) (PPIase) (Rotamase) (FKBP-23)                                                                                | FKBP7_HUMAN | 29992  | 100% | 10 | 11 | 41  | 32.80% |



## Protein Identified Sequence Coverage in TPC-1

|          |                                                                                                                                                       |             |        |      |   |   |   |        |
|----------|-------------------------------------------------------------------------------------------------------------------------------------------------------|-------------|--------|------|---|---|---|--------|
| TPC1-p13 | (Q9Y696) Chloride intracellular channel protein 4 (Intracellular chloride ion channel protein p64H1)                                                  | CLIC4_HUMAN | 28624  | 100% | 2 | 3 | 3 | 15.50% |
| TPC1-p15 | (O00115) Deoxyribonuclease-2-alpha precursor (EC 3.1.22.1) (Deoxyribonuclease II alpha) (DNase II alpha) (Acid DNase) (Lysosomal DNase II) (R31240_2) | DNS2A_HUMAN | 39563  | 100% | 2 | 2 | 6 | 7.22%  |
| TPC1-p15 | (O00115) Deoxyribonuclease-2-alpha precursor (EC 3.1.22.1) (Deoxyribonuclease II alpha) (DNase II alpha) (Acid DNase) (Lysosomal DNase II) (R31240_2) | DNS2A_HUMAN | 39563  | 100% | 3 | 3 | 4 | 8.61%  |
| TPC1-p15 | (O00115) Deoxyribonuclease-2-alpha precursor (EC 3.1.22.1) (Deoxyribonuclease II alpha) (DNase II alpha) (Acid DNase) (Lysosomal DNase II) (R31240_2) | DNS2A_HUMAN | 39563  | 100% | 2 | 2 | 3 | 6.11%  |
| TPC1-p15 | (O00115) Deoxyribonuclease-2-alpha precursor (EC 3.1.22.1) (Deoxyribonuclease II alpha) (DNase II alpha) (Acid DNase) (Lysosomal DNase II) (R31240_2) | DNS2A_HUMAN | 39563  | 100% | 2 | 2 | 3 | 6.67%  |
| TPC1-p15 | (O00115) Deoxyribonuclease-2-alpha precursor (EC 3.1.22.1) (Deoxyribonuclease II alpha) (DNase II alpha) (Acid DNase) (Lysosomal DNase II) (R31240_2) | DNS2A_HUMAN | 39563  | 100% | 3 | 4 | 6 | 21.90% |
| TPC1-p15 | (O00115) Deoxyribonuclease-2-alpha precursor (EC 3.1.22.1) (Deoxyribonuclease II alpha) (DNase II alpha) (Acid DNase) (Lysosomal DNase II) (R31240_2) | DNS2A_HUMAN | 39563  | 100% | 4 | 5 | 7 | 27.50% |
| TPC1-p15 | (O00115) Deoxyribonuclease-2-alpha precursor (EC 3.1.22.1) (Deoxyribonuclease II alpha) (DNase II alpha) (Acid DNase) (Lysosomal DNase II) (R31240_2) | DNS2A_HUMAN | 39563  | 100% | 2 | 2 | 7 | 16.40% |
| TPC1-p15 | (O00115) Deoxyribonuclease-2-alpha precursor (EC 3.1.22.1) (Deoxyribonuclease II alpha) (DNase II alpha) (Acid DNase) (Lysosomal DNase II) (R31240_2) | DNS2A_HUMAN | 39563  | 100% | 2 | 2 | 4 | 6.11%  |
| TPC1-p15 | (O00462) Beta-mannosidase precursor (EC 3.2.1.25) (Lysosomal beta A mannosidase) (Mannanase) (Mannase)                                                | MANBA_HUMAN | 100879 | 100% | 3 | 3 | 3 | 5.69%  |
| TPC1-p15 | (O00462) Beta-mannosidase precursor (EC 3.2.1.25) (Lysosomal beta A mannosidase) (Mannanase) (Mannase)                                                | MANBA_HUMAN | 100879 | 100% | 3 | 3 | 3 | 4.89%  |
| TPC1-p15 | (O00462) Beta-mannosidase precursor (EC 3.2.1.25) (Lysosomal beta A mannosidase) (Mannanase) (Mannase)                                                | MANBA_HUMAN | 100879 | 100% | 2 | 2 | 3 | 3.98%  |
| TPC1-p15 | (O00462) Beta-mannosidase precursor (EC 3.2.1.25) (Lysosomal beta A mannosidase) (Mannanase) (Mannase)                                                | MANBA_HUMAN | 100879 | 100% | 4 | 4 | 5 | 6.26%  |
| TPC1-p15 | (O00462) Beta-mannosidase precursor (EC 3.2.1.25) (Lysosomal beta A mannosidase) (Mannanase) (Mannase)                                                | MANBA_HUMAN | 100879 | 100% | 4 | 4 | 4 | 7.39%  |

## Protein Identified Sequence Coverage in TPC-1

|          |                                                                                                                                                                                                      |             |        |      |   |    |    |        |
|----------|------------------------------------------------------------------------------------------------------------------------------------------------------------------------------------------------------|-------------|--------|------|---|----|----|--------|
| TPC1-p15 | (O00468) Agrin precursor                                                                                                                                                                             | AGRN_HUMAN  | 214863 | 100% | 5 | 5  | 6  | 4.35%  |
| TPC1-p15 | (O00468) Agrin precursor                                                                                                                                                                             | AGRN_HUMAN  | 214863 | 100% | 4 | 4  | 7  | 3.08%  |
| TPC1-p15 | (O00468) Agrin precursor                                                                                                                                                                             | AGRN_HUMAN  | 214863 | 100% | 9 | 9  | 9  | 6.80%  |
| TPC1-p15 | (O00468) Agrin precursor                                                                                                                                                                             | AGRN_HUMAN  | 214863 | 100% | 6 | 6  | 7  | 7.33%  |
| TPC1-p15 | (O00468) Agrin precursor                                                                                                                                                                             | AGRN_HUMAN  | 214863 | 100% | 4 | 4  | 6  | 4.01%  |
| TPC1-p15 | (O00468) Agrin precursor                                                                                                                                                                             | AGRN_HUMAN  | 214863 | 100% | 2 | 2  | 2  | 2.44%  |
| TPC1-p15 | (O00468) Agrin precursor                                                                                                                                                                             | AGRN_HUMAN  | 214863 | 100% | 4 | 4  | 6  | 2.25%  |
| TPC1-p15 | (O00468) Agrin precursor                                                                                                                                                                             | AGRN_HUMAN  | 214863 | 100% | 4 | 4  | 6  | 5.28%  |
| TPC1-p15 | (O00468) Agrin precursor                                                                                                                                                                             | AGRN_HUMAN  | 214863 | 100% | 3 | 4  | 5  | 2.49%  |
| TPC1-p15 | (O00560) Syntenin-1 (Syndecan-binding protein 1) (Melanoma differentiation-associated protein 9) (MDA-9) (Scaffold protein Pbp1) (Pro-TGF-alpha cytoplasmic domain-interacting protein 18) (TACIP18) | SDCB1_HUMAN | 32427  | 100% | 2 | 2  | 2  | 14.10% |
| TPC1-p15 | (O00584) Ribonuclease T2 precursor (EC 3.1.27.-) (Ribonuclease 6)                                                                                                                                    | RNT2_HUMAN  | 29463  | 100% | 9 | 13 | 26 | 48.00% |
| TPC1-p15 | (O00584) Ribonuclease T2 precursor (EC 3.1.27.-) (Ribonuclease 6)                                                                                                                                    | RNT2_HUMAN  | 29463  | 100% | 9 | 15 | 27 | 48.80% |
| TPC1-p15 | (O00584) Ribonuclease T2 precursor (EC 3.1.27.-) (Ribonuclease 6)                                                                                                                                    | RNT2_HUMAN  | 29463  | 100% | 8 | 9  | 17 | 43.00% |
| TPC1-p15 | (O00584) Ribonuclease T2 precursor (EC 3.1.27.-) (Ribonuclease 6)                                                                                                                                    | RNT2_HUMAN  | 29463  | 100% | 9 | 10 | 21 | 43.40% |
| TPC1-p15 | (O00584) Ribonuclease T2 precursor (EC 3.1.27.-) (Ribonuclease 6)                                                                                                                                    | RNT2_HUMAN  | 29463  | 100% | 2 | 2  | 9  | 16.00% |
| TPC1-p15 | (O00584) Ribonuclease T2 precursor (EC 3.1.27.-) (Ribonuclease 6)                                                                                                                                    | RNT2_HUMAN  | 29463  | 100% | 2 | 3  | 4  | 13.70% |
| TPC1-p15 | (O00584) Ribonuclease T2 precursor (EC 3.1.27.-) (Ribonuclease 6)                                                                                                                                    | RNT2_HUMAN  | 29463  | 100% | 2 | 2  | 3  | 12.50% |
| TPC1-p15 | (O00584) Ribonuclease T2 precursor (EC 3.1.27.-) (Ribonuclease 6)                                                                                                                                    | RNT2_HUMAN  | 29463  | 100% | 3 | 4  | 28 | 18.40% |
| TPC1-p15 | (O00584) Ribonuclease T2 precursor (EC 3.1.27.-) (Ribonuclease 6)                                                                                                                                    | RNT2_HUMAN  | 29463  | 100% | 3 | 4  | 27 | 21.10% |
| TPC1-p15 | (O00584) Ribonuclease T2 precursor (EC 3.1.27.-) (Ribonuclease 6)                                                                                                                                    | RNT2_HUMAN  | 29463  | 100% | 3 | 4  | 27 | 20.70% |
| TPC1-p15 | (O00584) Ribonuclease T2 precursor (EC 3.1.27.-) (Ribonuclease 6)                                                                                                                                    | RNT2_HUMAN  | 29463  | 100% | 3 | 6  | 12 | 18.80% |
| TPC1-p15 | (O00622) Protein CYR61 precursor (Cysteine-rich, angiogenic inducer, 61) (Insulin-like growth factor-binding protein 10) (Protein GIG1)                                                              | CYR61_HUMAN | 42008  | 100% | 3 | 3  | 5  | 13.10% |
| TPC1-p15 | (O00622) Protein CYR61 precursor (Cysteine-rich, angiogenic inducer, 61) (Insulin-like growth factor-binding protein 10) (Protein GIG1)                                                              | CYR61_HUMAN | 42008  | 100% | 2 | 2  | 4  | 7.09%  |
| TPC1-p15 | (O00622) Protein CYR61 precursor (Cysteine-rich, angiogenic inducer, 61) (Insulin-like growth factor-binding protein 10) (Protein GIG1)                                                              | CYR61_HUMAN | 42008  | 100% | 4 | 4  | 4  | 19.40% |
| TPC1-p15 | (O00622) Protein CYR61 precursor (Cysteine-rich, angiogenic inducer, 61) (Insulin-like growth factor-binding protein 10) (Protein GIG1)                                                              | CYR61_HUMAN | 42008  | 100% | 2 | 2  | 4  | 7.09%  |

## Protein Identified Sequence Coverage in TPC-1

|          |                                                                                                                                                                                                                                                    |             |        |      |   |   |   |        |
|----------|----------------------------------------------------------------------------------------------------------------------------------------------------------------------------------------------------------------------------------------------------|-------------|--------|------|---|---|---|--------|
| TPC1-p15 | (O00622) Protein CYR61 precursor (Cysteine-rich, angiogenic inducer, 61) (Insulin-like growth factor-binding protein 10) (Protein GIG1)                                                                                                            | CYR61_HUMAN | 42008  | 100% | 4 | 4 | 6 | 17.30% |
| TPC1-p15 | (O00754) Lysosomal alpha-mannosidase precursor (EC 3.2.1.24) (Mannosidase, alpha B) (Lysosomal acid alpha-mannosidase) (Laman) (Mannosidase alpha class 2B member 1) [Contains: Lysosomal alpha-mannosidase A peptide; Lysosomal alpha-mannosidase | MA2B1_HUMAN | 113656 | 100% | 2 | 2 | 2 | 3.37%  |
| TPC1-p15 | (O00754) Lysosomal alpha-mannosidase precursor (EC 3.2.1.24) (Mannosidase, alpha B) (Lysosomal acid alpha-mannosidase) (Laman) (Mannosidase alpha class 2B member 1) [Contains: Lysosomal alpha-mannosidase A peptide; Lysosomal alpha-mannosidase | MA2B1_HUMAN | 113656 | 100% | 2 | 2 | 3 | 3.96%  |
| TPC1-p15 | (O00754) Lysosomal alpha-mannosidase precursor (EC 3.2.1.24) (Mannosidase, alpha B) (Lysosomal acid alpha-mannosidase) (Laman) (Mannosidase alpha class 2B member 1) [Contains: Lysosomal alpha-mannosidase A peptide; Lysosomal alpha-mannosidase | MA2B1_HUMAN | 113656 | 100% | 2 | 3 | 4 | 3.66%  |
| TPC1-p15 | (O00754) Lysosomal alpha-mannosidase precursor (EC 3.2.1.24) (Mannosidase, alpha B) (Lysosomal acid alpha-mannosidase) (Laman) (Mannosidase alpha class 2B member 1) [Contains: Lysosomal alpha-mannosidase A peptide; Lysosomal alpha-mannosidase | MA2B1_HUMAN | 113656 | 100% | 2 | 2 | 2 | 3.66%  |
| TPC1-p15 | (O00754) Lysosomal alpha-mannosidase precursor (EC 3.2.1.24) (Mannosidase, alpha B) (Lysosomal acid alpha-mannosidase) (Laman) (Mannosidase alpha class 2B member 1) [Contains: Lysosomal alpha-mannosidase A peptide; Lysosomal alpha-mannosidase | MA2B1_HUMAN | 113656 | 100% | 3 | 4 | 7 | 5.05%  |
| TPC1-p15 | (O00754) Lysosomal alpha-mannosidase precursor (EC 3.2.1.24) (Mannosidase, alpha B) (Lysosomal acid alpha-mannosidase) (Laman) (Mannosidase alpha class 2B member 1) [Contains: Lysosomal alpha-mannosidase A peptide; Lysosomal alpha-mannosidase | MA2B1_HUMAN | 113656 | 100% | 3 | 3 | 3 | 4.95%  |
| TPC1-p15 | (O00754) Lysosomal alpha-mannosidase precursor (EC 3.2.1.24) (Mannosidase, alpha B) (Lysosomal acid alpha-mannosidase) (Laman) (Mannosidase alpha class 2B member 1) [Contains: Lysosomal alpha-mannosidase A peptide; Lysosomal alpha-mannosidase | MA2B1_HUMAN | 113656 | 100% | 4 | 5 | 6 | 8.12%  |

## Protein Identified Sequence Coverage in TPC-1

|          |                                                                                                                                                                                                                                                    |             |        |      |   |   |    |        |
|----------|----------------------------------------------------------------------------------------------------------------------------------------------------------------------------------------------------------------------------------------------------|-------------|--------|------|---|---|----|--------|
| TPC1-p15 | (O00754) Lysosomal alpha-mannosidase precursor (EC 3.2.1.24) (Mannosidase, alpha B) (Lysosomal acid alpha-mannosidase) (Laman) (Mannosidase alpha class 2B member 1) [Contains: Lysosomal alpha-mannosidase A peptide; Lysosomal alpha-mannosidase | MA2B1_HUMAN | 113656 | 100% | 3 | 3 | 4  | 5.74%  |
| TPC1-p15 | (O14672) ADAM 10 precursor (EC 3.4.24.81) (A disintegrin and metalloproteinase domain 10) (Mammalian disintegrin-metalloprotease) (Kuzbanian protein homolog) (CDw156c antigen)                                                                    | ADA10_HUMAN | 84125  | 100% | 2 | 2 | 3  | 4.14%  |
| TPC1-p15 | (O14672) ADAM 10 precursor (EC 3.4.24.81) (A disintegrin and metalloproteinase domain 10) (Mammalian disintegrin-metalloprotease) (Kuzbanian protein homolog) (CDw156c antigen)                                                                    | ADA10_HUMAN | 84125  | 100% | 3 | 3 | 3  | 5.21%  |
| TPC1-p15 | (O14672) ADAM 10 precursor (EC 3.4.24.81) (A disintegrin and metalloproteinase domain 10) (Mammalian disintegrin-metalloprotease) (Kuzbanian protein homolog) (CDw156c antigen)                                                                    | ADA10_HUMAN | 84125  | 100% | 2 | 2 | 2  | 4.14%  |
| TPC1-p15 | (O14672) ADAM 10 precursor (EC 3.4.24.81) (A disintegrin and metalloproteinase domain 10) (Mammalian disintegrin-metalloprotease) (Kuzbanian protein homolog) (CDw156c antigen)                                                                    | ADA10_HUMAN | 84125  | 100% | 3 | 4 | 6  | 5.61%  |
| TPC1-p15 | (O14672) ADAM 10 precursor (EC 3.4.24.81) (A disintegrin and metalloproteinase domain 10) (Mammalian disintegrin-metalloprotease) (Kuzbanian protein homolog) (CDw156c antigen)                                                                    | ADA10_HUMAN | 84125  | 100% | 2 | 3 | 5  | 5.35%  |
| TPC1-p15 | (O14672) ADAM 10 precursor (EC 3.4.24.81) (A disintegrin and metalloproteinase domain 10) (Mammalian disintegrin-metalloprotease) (Kuzbanian protein homolog) (CDw156c antigen)                                                                    | ADA10_HUMAN | 84125  | 100% | 2 | 3 | 4  | 2.27%  |
| TPC1-p15 | (O14773) Tripeptidyl-peptidase 1 precursor (EC 3.4.14.9) (Tripeptidyl-peptidase I) (TPP-I) (Tripeptidyl aminopeptidase) (Lysosomal pepstatin insensitive protease) (LPIC) (Growth-inhibiting gene 1 protein)                                       | TPP1_HUMAN  | 61230  | 100% | 6 | 8 | 16 | 23.40% |
| TPC1-p15 | (O14773) Tripeptidyl-peptidase 1 precursor (EC 3.4.14.9) (Tripeptidyl-peptidase I) (TPP-I) (Tripeptidyl aminopeptidase) (Lysosomal pepstatin insensitive protease) (LPIC) (Growth-inhibiting gene 1 protein)                                       | TPP1_HUMAN  | 61230  | 100% | 5 | 7 | 11 | 19.70% |
| TPC1-p15 | (O14773) Tripeptidyl-peptidase 1 precursor (EC 3.4.14.9) (Tripeptidyl-peptidase I) (TPP-I) (Tripeptidyl aminopeptidase) (Lysosomal pepstatin insensitive protease) (LPIC) (Growth-inhibiting gene 1 protein)                                       | TPP1_HUMAN  | 61230  | 100% | 6 | 7 | 7  | 19.90% |

Protein Identified Sequence Coverage in TPC-1

|          |                                                                                                                                                                                                              |            |       |      |   |   |    |        |
|----------|--------------------------------------------------------------------------------------------------------------------------------------------------------------------------------------------------------------|------------|-------|------|---|---|----|--------|
| TPC1-p15 | (O14773) Tripeptidyl-peptidase 1 precursor (EC 3.4.14.9) (Tripeptidyl-peptidase I) (TPP-I) (Tripeptidyl aminopeptidase) (Lysosomal pepstatin insensitive protease) (LPIC) (Growth-inhibiting gene 1 protein) | TPP1_HUMAN | 61230 | 100% | 5 | 6 | 11 | 17.10% |
| TPC1-p15 | (O14773) Tripeptidyl-peptidase 1 precursor (EC 3.4.14.9) (Tripeptidyl-peptidase I) (TPP-I) (Tripeptidyl aminopeptidase) (Lysosomal pepstatin insensitive protease) (LPIC) (Growth-inhibiting gene 1 protein) | TPP1_HUMAN | 61230 | 100% | 2 | 2 | 7  | 10.50% |
| TPC1-p15 | (O14773) Tripeptidyl-peptidase 1 precursor (EC 3.4.14.9) (Tripeptidyl-peptidase I) (TPP-I) (Tripeptidyl aminopeptidase) (Lysosomal pepstatin insensitive protease) (LPIC) (Growth-inhibiting gene 1 protein) | TPP1_HUMAN | 61230 | 100% | 4 | 5 | 13 | 19.90% |
| TPC1-p15 | (O14773) Tripeptidyl-peptidase 1 precursor (EC 3.4.14.9) (Tripeptidyl-peptidase I) (TPP-I) (Tripeptidyl aminopeptidase) (Lysosomal pepstatin insensitive protease) (LPIC) (Growth-inhibiting gene 1 protein) | TPP1_HUMAN | 61230 | 100% | 2 | 3 | 12 | 9.95%  |
| TPC1-p15 | (O14773) Tripeptidyl-peptidase 1 precursor (EC 3.4.14.9) (Tripeptidyl-peptidase I) (TPP-I) (Tripeptidyl aminopeptidase) (Lysosomal pepstatin insensitive protease) (LPIC) (Growth-inhibiting gene 1 protein) | TPP1_HUMAN | 61230 | 100% | 3 | 3 | 8  | 8.35%  |
| TPC1-p15 | (O14773) Tripeptidyl-peptidase 1 precursor (EC 3.4.14.9) (Tripeptidyl-peptidase I) (TPP-I) (Tripeptidyl aminopeptidase) (Lysosomal pepstatin insensitive protease) (LPIC) (Growth-inhibiting gene 1 protein) | TPP1_HUMAN | 61230 | 100% | 2 | 2 | 9  | 9.95%  |
| TPC1-p15 | (O14773) Tripeptidyl-peptidase 1 precursor (EC 3.4.14.9) (Tripeptidyl-peptidase I) (TPP-I) (Tripeptidyl aminopeptidase) (Lysosomal pepstatin insensitive protease) (LPIC) (Growth-inhibiting gene 1 protein) | TPP1_HUMAN | 61230 | 100% | 2 | 2 | 5  | 6.93%  |
| TPC1-p15 | (O14773) Tripeptidyl-peptidase 1 precursor (EC 3.4.14.9) (Tripeptidyl-peptidase I) (TPP-I) (Tripeptidyl aminopeptidase) (Lysosomal pepstatin insensitive protease) (LPIC) (Growth-inhibiting gene 1 protein) | TPP1_HUMAN | 61230 | 100% | 4 | 4 | 20 | 20.10% |
| TPC1-p15 | (O14773) Tripeptidyl-peptidase 1 precursor (EC 3.4.14.9) (Tripeptidyl-peptidase I) (TPP-I) (Tripeptidyl aminopeptidase) (Lysosomal pepstatin insensitive protease) (LPIC) (Growth-inhibiting gene 1 protein) | TPP1_HUMAN | 61230 | 100% | 2 | 3 | 33 | 6.93%  |

## Protein Identified Sequence Coverage in TPC-1

|          |                                                                                                                                                                                                              |             |        |      |   |   |    |        |
|----------|--------------------------------------------------------------------------------------------------------------------------------------------------------------------------------------------------------------|-------------|--------|------|---|---|----|--------|
| TPC1-p15 | (O14773) Tripeptidyl-peptidase 1 precursor (EC 3.4.14.9) (Tripeptidyl-peptidase I) (TPP-I) (Tripeptidyl aminopeptidase) (Lysosomal pepstatin insensitive protease) (LPIC) (Growth-inhibiting gene 1 protein) | TPP1_HUMAN  | 61230  | 100% | 2 | 2 | 4  | 11.50% |
| TPC1-p15 | (O14773) Tripeptidyl-peptidase 1 precursor (EC 3.4.14.9) (Tripeptidyl-peptidase I) (TPP-I) (Tripeptidyl aminopeptidase) (Lysosomal pepstatin insensitive protease) (LPIC) (Growth-inhibiting gene 1 protein) | TPP1_HUMAN  | 61230  | 100% | 3 | 4 | 12 | 13.30% |
| TPC1-p15 | (O14786) Neuropilin-1 precursor (Vascular endothelial cell growth factor 165 receptor) (CD304 antigen)                                                                                                       | NRP1_HUMAN  | 103105 | 100% | 2 | 2 | 4  | 3.90%  |
| TPC1-p15 | (O15031) Plexin-B2 precursor (MM1)                                                                                                                                                                           | PLXB2_HUMAN | 205081 | 100% | 2 | 2 | 2  | 2.61%  |
| TPC1-p15 | (O15031) Plexin-B2 precursor (MM1)                                                                                                                                                                           | PLXB2_HUMAN | 205081 | 100% | 2 | 2 | 2  | 1.69%  |
| TPC1-p15 | (O15031) Plexin-B2 precursor (MM1)                                                                                                                                                                           | PLXB2_HUMAN | 205081 | 100% | 2 | 2 | 3  | 1.90%  |
| TPC1-p15 | (O15031) Plexin-B2 precursor (MM1)                                                                                                                                                                           | PLXB2_HUMAN | 205081 | 100% | 2 | 2 | 2  | 2.18%  |
| TPC1-p15 | (O15230) Laminin alpha-5 chain precursor                                                                                                                                                                     | LAMA5_HUMAN | 399681 | 100% | 2 | 2 | 2  | 0.70%  |
| TPC1-p15 | (O15230) Laminin alpha-5 chain precursor                                                                                                                                                                     | LAMA5_HUMAN | 399681 | 100% | 2 | 3 | 3  | 0.95%  |
| TPC1-p15 | (O43399) Tumor protein D54 (hD54) (Tumor protein D52-like 2)                                                                                                                                                 | TPD54_HUMAN | 22220  | 100% | 6 | 6 | 9  | 49.50% |
| TPC1-p15 | (O43399) Tumor protein D54 (hD54) (Tumor protein D52-like 2)                                                                                                                                                 | TPD54_HUMAN | 22220  | 100% | 4 | 4 | 5  | 30.10% |
| TPC1-p15 | (O43399) Tumor protein D54 (hD54) (Tumor protein D52-like 2)                                                                                                                                                 | TPD54_HUMAN | 22220  | 100% | 5 | 5 | 5  | 49.50% |
| TPC1-p15 | (O43399) Tumor protein D54 (hD54) (Tumor protein D52-like 2)                                                                                                                                                 | TPD54_HUMAN | 22220  | 100% | 4 | 4 | 4  | 28.60% |
| TPC1-p15 | (O43399) Tumor protein D54 (hD54) (Tumor protein D52-like 2)                                                                                                                                                 | TPD54_HUMAN | 22220  | 100% | 2 | 2 | 5  | 14.60% |
| TPC1-p15 | (O43399) Tumor protein D54 (hD54) (Tumor protein D52-like 2)                                                                                                                                                 | TPD54_HUMAN | 22220  | 100% | 3 | 3 | 3  | 21.80% |
| TPC1-p15 | (O43399) Tumor protein D54 (hD54) (Tumor protein D52-like 2)                                                                                                                                                 | TPD54_HUMAN | 22220  | 100% | 2 | 3 | 5  | 14.60% |
| TPC1-p15 | (O43570) Carbonic anhydrase 12 precursor (EC 4.2.1.1) (Carbonic anhydrase XII) (Carbonate dehydratase XII) (CA-XII) (Tumor antigen HOM-RCC-3.1.3)                                                            | CAH12_HUMAN | 39434  | 100% | 2 | 2 | 2  | 9.32%  |
| TPC1-p15 | (O43570) Carbonic anhydrase 12 precursor (EC 4.2.1.1) (Carbonic anhydrase XII) (Carbonate dehydratase XII) (CA-XII) (Tumor antigen HOM-RCC-3.1.3)                                                            | CAH12_HUMAN | 39434  | 100% | 3 | 3 | 3  | 9.89%  |
| TPC1-p15 | (O43570) Carbonic anhydrase 12 precursor (EC 4.2.1.1) (Carbonic anhydrase XII) (Carbonate dehydratase XII) (CA-XII) (Tumor antigen HOM-RCC-3.1.3)                                                            | CAH12_HUMAN | 39434  | 100% | 2 | 2 | 3  | 11.30% |
| TPC1-p15 | (O43570) Carbonic anhydrase 12 precursor (EC 4.2.1.1) (Carbonic anhydrase XII) (Carbonate dehydratase XII) (CA-XII) (Tumor antigen HOM-RCC-3.1.3)                                                            | CAH12_HUMAN | 39434  | 100% | 2 | 3 | 3  | 13.60% |

## Protein Identified Sequence Coverage in TPC-1

|          |                                                                                                                                                                                                                                                    |             |       |      |   |   |    |        |
|----------|----------------------------------------------------------------------------------------------------------------------------------------------------------------------------------------------------------------------------------------------------|-------------|-------|------|---|---|----|--------|
| TPC1-p15 | (O43809) Cleavage and polyadenylation specificity factor 5 (Cleavage and polyadenylation specificity factor 25 kDa subunit) (CPSF 25 kDa subunit) (Pre-mRNA cleavage factor Im 25-kDa subunit) (Nucleoside diphosphate-linked moiety X motif 21) ( | CPSF5_HUMAN | 26210 | 100% | 3 | 4 | 8  | 19.80% |
| TPC1-p15 | (O43854) EGF-like repeat and discoidin I-like domain-containing protein 3 precursor (EGF-like repeats and discoidin I-like domains protein 3) (Developmentally-regulated endothelial cell locus 1 protein) (Integrin-binding protein DEL1)         | EDIL3_HUMAN | 53747 | 100% | 6 | 6 | 9  | 23.30% |
| TPC1-p15 | (O43854) EGF-like repeat and discoidin I-like domain-containing protein 3 precursor (EGF-like repeats and discoidin I-like domains protein 3) (Developmentally-regulated endothelial cell locus 1 protein) (Integrin-binding protein DEL1)         | EDIL3_HUMAN | 53747 | 100% | 5 | 7 | 13 | 16.90% |
| TPC1-p15 | (O43854) EGF-like repeat and discoidin I-like domain-containing protein 3 precursor (EGF-like repeats and discoidin I-like domains protein 3) (Developmentally-regulated endothelial cell locus 1 protein) (Integrin-binding protein DEL1)         | EDIL3_HUMAN | 53747 | 100% | 4 | 6 | 6  | 14.60% |
| TPC1-p15 | (O43854) EGF-like repeat and discoidin I-like domain-containing protein 3 precursor (EGF-like repeats and discoidin I-like domains protein 3) (Developmentally-regulated endothelial cell locus 1 protein) (Integrin-binding protein DEL1)         | EDIL3_HUMAN | 53747 | 100% | 6 | 6 | 8  | 19.40% |
| TPC1-p15 | (O43854) EGF-like repeat and discoidin I-like domain-containing protein 3 precursor (EGF-like repeats and discoidin I-like domains protein 3) (Developmentally-regulated endothelial cell locus 1 protein) (Integrin-binding protein DEL1)         | EDIL3_HUMAN | 53747 | 100% | 2 | 2 | 9  | 8.75%  |
| TPC1-p15 | (O43854) EGF-like repeat and discoidin I-like domain-containing protein 3 precursor (EGF-like repeats and discoidin I-like domains protein 3) (Developmentally-regulated endothelial cell locus 1 protein) (Integrin-binding protein DEL1)         | EDIL3_HUMAN | 53747 | 100% | 2 | 2 | 4  | 7.50%  |
| TPC1-p15 | (O43854) EGF-like repeat and discoidin I-like domain-containing protein 3 precursor (EGF-like repeats and discoidin I-like domains protein 3) (Developmentally-regulated endothelial cell locus 1 protein) (Integrin-binding protein DEL1)         | EDIL3_HUMAN | 53747 | 100% | 2 | 2 | 4  | 10.00% |
| TPC1-p15 | (O60664) Mannose-6-phosphate receptor-binding protein 1 (Cargo selection protein TIP47) (47 kDa mannose 6-phosphate receptor-binding protein) (47 kDa MPR-binding protein) (Placental protein 17) (PP17)                                           | M6PBP_HUMAN | 47028 | 100% | 3 | 4 | 5  | 12.40% |
| TPC1-p15 | (O75367) Core histone macro-H2A.1 (Histone macroH2A1) (mH2A1) (H2A.y) (H2A/y) (Medulloblastoma antigen MU-MB-50.205)                                                                                                                               | H2AY_HUMAN  | 39470 | 100% | 5 | 6 | 7  | 24.30% |

## Protein Identified Sequence Coverage in TPC-1

|          |                                                                                                                                                          |             |        |      |   |   |    |        |
|----------|----------------------------------------------------------------------------------------------------------------------------------------------------------|-------------|--------|------|---|---|----|--------|
| TPC1-p15 | (O75367) Core histone macro-H2A.1 (Histone macroH2A1) (mH2A1) (H2A.y) (H2A/y) (Medulloblastoma antigen MU-MB-50.205)                                     | H2AY_HUMAN  | 39470  | 100% | 3 | 3 | 6  | 13.50% |
| TPC1-p15 | (O75367) Core histone macro-H2A.1 (Histone macroH2A1) (mH2A1) (H2A.y) (H2A/y) (Medulloblastoma antigen MU-MB-50.205)                                     | H2AY_HUMAN  | 39470  | 100% | 5 | 5 | 5  | 22.90% |
| TPC1-p15 | (O75367) Core histone macro-H2A.1 (Histone macroH2A1) (mH2A1) (H2A.y) (H2A/y) (Medulloblastoma antigen MU-MB-50.205)                                     | H2AY_HUMAN  | 39470  | 100% | 4 | 4 | 5  | 18.90% |
| TPC1-p15 | (O75367) Core histone macro-H2A.1 (Histone macroH2A1) (mH2A1) (H2A.y) (H2A/y) (Medulloblastoma antigen MU-MB-50.205)                                     | H2AY_HUMAN  | 39470  | 100% | 3 | 3 | 3  | 12.70% |
| TPC1-p15 | (O75367) Core histone macro-H2A.1 (Histone macroH2A1) (mH2A1) (H2A.y) (H2A/y) (Medulloblastoma antigen MU-MB-50.205)                                     | H2AY_HUMAN  | 39470  | 100% | 4 | 4 | 8  | 12.10% |
| TPC1-p15 | (O75367) Core histone macro-H2A.1 (Histone macroH2A1) (mH2A1) (H2A.y) (H2A/y) (Medulloblastoma antigen MU-MB-50.205)                                     | H2AY_HUMAN  | 39470  | 100% | 2 | 4 | 14 | 9.97%  |
| TPC1-p15 | (O75367) Core histone macro-H2A.1 (Histone macroH2A1) (mH2A1) (H2A.y) (H2A/y) (Medulloblastoma antigen MU-MB-50.205)                                     | H2AY_HUMAN  | 39470  | 100% | 2 | 3 | 4  | 13.50% |
| TPC1-p15 | (O75503) Ceroid-lipofuscinosis neuronal protein 5 (Protein CLN5)                                                                                         | CLN5_HUMAN  | 46323  | 100% | 2 | 2 | 2  | 12.00% |
| TPC1-p15 | (O75629) CREG1 protein precursor (Cellular repressor of E1A-stimulated genes 1)                                                                          | CREG1_HUMAN | 24057  | 100% | 2 | 2 | 3  | 13.20% |
| TPC1-p15 | (O75629) CREG1 protein precursor (Cellular repressor of E1A-stimulated genes 1)                                                                          | CREG1_HUMAN | 24057  | 100% | 2 | 2 | 3  | 12.70% |
| TPC1-p15 | (O76021) Ribosomal L1 domain-containing protein 1 (Cellular senescence-inhibited gene protein) (PBK1 protein) (CATX-11)                                  | RL1D1_HUMAN | 54957  | 100% | 2 | 2 | 3  | 5.71%  |
| TPC1-p15 | (O76021) Ribosomal L1 domain-containing protein 1 (Cellular senescence-inhibited gene protein) (PBK1 protein) (CATX-11)                                  | RL1D1_HUMAN | 54957  | 100% | 2 | 2 | 3  | 4.90%  |
| TPC1-p15 | (O76021) Ribosomal L1 domain-containing protein 1 (Cellular senescence-inhibited gene protein) (PBK1 protein) (CATX-11)                                  | RL1D1_HUMAN | 54957  | 100% | 3 | 3 | 3  | 8.98%  |
| TPC1-p15 | (O76021) Ribosomal L1 domain-containing protein 1 (Cellular senescence-inhibited gene protein) (PBK1 protein) (CATX-11)                                  | RL1D1_HUMAN | 54957  | 100% | 3 | 3 | 4  | 8.16%  |
| TPC1-p15 | (O94985) Calsyntenin-1 precursor                                                                                                                         | CSTN1_HUMAN | 109774 | 100% | 2 | 2 | 2  | 2.96%  |
| TPC1-p15 | (P00338) L-lactate dehydrogenase A chain (EC 1.1.1.27) (LDH-A) (LDH muscle subunit) (LDH-M) (Proliferation-inducing gene 19 protein) (NY-REN-59 antigen) | LDHA_HUMAN  | 36540  | 100% | 2 | 2 | 4  | 7.85%  |
| TPC1-p15 | (P00390) Glutathione reductase, mitochondrial precursor (EC 1.8.1.7) (GR) (GRase)                                                                        | GSHR_HUMAN  | 56239  | 100% | 2 | 2 | 3  | 7.66%  |
| TPC1-p15 | (P00533) Epidermal growth factor receptor precursor (EC 2.7.10.1) (Receptor tyrosine-protein kinase ErbB-1)                                              | EGFR_HUMAN  | 134261 | 100% | 2 | 2 | 2  | 2.89%  |



## Protein Identified Sequence Coverage in TPC-1

|          |                                                                                                                                                                                                                                                       |             |        |      |    |    |    |        |
|----------|-------------------------------------------------------------------------------------------------------------------------------------------------------------------------------------------------------------------------------------------------------|-------------|--------|------|----|----|----|--------|
| TPC1-p15 | (P00558) Phosphoglycerate kinase 1 (EC 2.7.2.3) (Primer recognition protein 2) (PRP 2)                                                                                                                                                                | PGK1_HUMAN  | 44466  | 100% | 2  | 2  | 2  | 8.41%  |
| TPC1-p15 | (P00558) Phosphoglycerate kinase 1 (EC 2.7.2.3) (Primer recognition protein 2) (PRP 2)                                                                                                                                                                | PGK1_HUMAN  | 44466  | 100% | 2  | 3  | 4  | 10.30% |
| TPC1-p15 | (P00749) Urokinase-type plasminogen activator precursor (EC 3.4.21.73) (uPA) (U-plasminogen activator) [Contains: Urokinase-type plasminogen activator long chain A; Urokinase-type plasminogen activator short chain A; Urokinase-type plasminogen   | UROK_HUMAN  | 48508  | 100% | 2  | 2  | 2  | 9.28%  |
| TPC1-p15 | (P01011) Alpha-1-antichymotrypsin precursor (ACT) [Contains: Alpha-1-antichymotrypsin His-Pro-less]                                                                                                                                                   | AACT_HUMAN  | 47635  | 100% | 2  | 3  | 5  | 12.10% |
| TPC1-p15 | (P01024) Complement C3 precursor [Contains: Complement C3 beta chain; Complement C3 alpha chain; C3a anaphylatoxin; Complement C3b alpha' chain; Complement C3c fragment; Complement C3dg fragment; Complement C3g fragment; Complement C3d fragment] | CO3_HUMAN   | 187147 | 100% | 2  | 2  | 2  | 2.35%  |
| TPC1-p15 | (P01033) Metalloproteinase inhibitor 1 precursor (TIMP-1) (Erythroid potentiating activity) (EPA) (Tissue inhibitor of metalloproteinases) (Fibroblast collagenase inhibitor) (Collagenase inhibitor)                                                 | TIMP1_HUMAN | 23153  | 100% | 2  | 3  | 5  | 13.50% |
| TPC1-p15 | (P02462) Collagen alpha-1(IV) chain precursor                                                                                                                                                                                                         | CO4A1_HUMAN | 160596 | 100% | 2  | 2  | 3  | 2.82%  |
| TPC1-p15 | (P02462) Collagen alpha-1(IV) chain precursor                                                                                                                                                                                                         | CO4A1_HUMAN | 160596 | 100% | 2  | 2  | 3  | 1.44%  |
| TPC1-p15 | (P02462) Collagen alpha-1(IV) chain precursor                                                                                                                                                                                                         | CO4A1_HUMAN | 160596 | 100% | 2  | 2  | 3  | 1.44%  |
| TPC1-p15 | (P02751) Fibronectin precursor (FN) (Cold-insoluble globulin) (CIG)                                                                                                                                                                                   | FINC_HUMAN  | 262581 | 100% | 24 | 27 | 41 | 17.90% |
| TPC1-p15 | (P02751) Fibronectin precursor (FN) (Cold-insoluble globulin) (CIG)                                                                                                                                                                                   | FINC_HUMAN  | 262581 | 100% | 24 | 26 | 38 | 19.30% |
| TPC1-p15 | (P02751) Fibronectin precursor (FN) (Cold-insoluble globulin) (CIG)                                                                                                                                                                                   | FINC_HUMAN  | 262581 | 100% | 25 | 29 | 30 | 18.70% |
| TPC1-p15 | (P02751) Fibronectin precursor (FN) (Cold-insoluble globulin) (CIG)                                                                                                                                                                                   | FINC_HUMAN  | 262581 | 100% | 22 | 23 | 37 | 14.10% |
| TPC1-p15 | (P02751) Fibronectin precursor (FN) (Cold-insoluble globulin) (CIG)                                                                                                                                                                                   | FINC_HUMAN  | 262581 | 100% | 21 | 21 | 33 | 20.60% |
| TPC1-p15 | (P02751) Fibronectin precursor (FN) (Cold-insoluble globulin) (CIG)                                                                                                                                                                                   | FINC_HUMAN  | 262581 | 100% | 11 | 13 | 31 | 8.13%  |
| TPC1-p15 | (P02751) Fibronectin precursor (FN) (Cold-insoluble globulin) (CIG)                                                                                                                                                                                   | FINC_HUMAN  | 262581 | 100% | 12 | 14 | 31 | 7.12%  |
| TPC1-p15 | (P02751) Fibronectin precursor (FN) (Cold-insoluble globulin) (CIG)                                                                                                                                                                                   | FINC_HUMAN  | 262581 | 100% | 8  | 10 | 12 | 4.65%  |
| TPC1-p15 | (P02751) Fibronectin precursor (FN) (Cold-insoluble globulin) (CIG)                                                                                                                                                                                   | FINC_HUMAN  | 262581 | 100% | 6  | 6  | 27 | 3.98%  |
| TPC1-p15 | (P02751) Fibronectin precursor (FN) (Cold-insoluble globulin) (CIG)                                                                                                                                                                                   | FINC_HUMAN  | 262581 | 100% | 10 | 12 | 15 | 7.63%  |
| TPC1-p15 | (P02751) Fibronectin precursor (FN) (Cold-insoluble globulin) (CIG)                                                                                                                                                                                   | FINC_HUMAN  | 262581 | 100% | 4  | 5  | 16 | 4.44%  |

## Protein Identified Sequence Coverage in TPC-1

|          |                                                                                                                                                                                  |            |        |      |    |    |    |        |
|----------|----------------------------------------------------------------------------------------------------------------------------------------------------------------------------------|------------|--------|------|----|----|----|--------|
| TPC1-p15 | (P02751) Fibronectin precursor (FN) (Cold-insoluble globulin) (CiG)                                                                                                              | FINC_HUMAN | 262581 | 100% | 14 | 17 | 25 | 11.10% |
| TPC1-p15 | (P02751) Fibronectin precursor (FN) (Cold-insoluble globulin) (CiG)                                                                                                              | FINC_HUMAN | 262581 | 100% | 9  | 12 | 32 | 9.43%  |
| TPC1-p15 | (P02751) Fibronectin precursor (FN) (Cold-insoluble globulin) (CiG)                                                                                                              | FINC_HUMAN | 262581 | 100% | 6  | 7  | 31 | 6.71%  |
| TPC1-p15 | (P02751) Fibronectin precursor (FN) (Cold-insoluble globulin) (CiG)                                                                                                              | FINC_HUMAN | 262581 | 100% | 4  | 4  | 7  | 4.65%  |
| TPC1-p15 | (P02768) Serum albumin precursor                                                                                                                                                 | ALBU_HUMAN | 69349  | 100% | 2  | 2  | 3  | 5.58%  |
| TPC1-p15 | (P02768) Serum albumin precursor                                                                                                                                                 | ALBU_HUMAN | 69349  | 100% | 2  | 2  | 6  | 5.58%  |
| TPC1-p15 | (P02768) Serum albumin precursor                                                                                                                                                 | ALBU_HUMAN | 69349  | 100% | 4  | 5  | 18 | 11.30% |
| TPC1-p15 | (P02768) Serum albumin precursor                                                                                                                                                 | ALBU_HUMAN | 69349  | 100% | 2  | 2  | 7  | 5.58%  |
| TPC1-p15 | (P02768) Serum albumin precursor                                                                                                                                                 | ALBU_HUMAN | 69349  | 100% | 4  | 4  | 6  | 10.00% |
| TPC1-p15 | (P02768) Serum albumin precursor                                                                                                                                                 | ALBU_HUMAN | 69349  | 100% | 3  | 4  | 12 | 12.80% |
| TPC1-p15 | (P02768) Serum albumin precursor                                                                                                                                                 | ALBU_HUMAN | 69349  | 100% | 3  | 3  | 14 | 9.03%  |
| TPC1-p15 | (P02794) Ferritin heavy chain (EC 1.16.3.1) (Ferritin H subunit) (Proliferation-inducing gene 15 protein)                                                                        | FRIH_HUMAN | 21077  | 100% | 3  | 3  | 4  | 21.40% |
| TPC1-p15 | (P02794) Ferritin heavy chain (EC 1.16.3.1) (Ferritin H subunit) (Proliferation-inducing gene 15 protein)                                                                        | FRIH_HUMAN | 21077  | 100% | 4  | 4  | 8  | 28.60% |
| TPC1-p15 | (P04062) Glucosylceramidase precursor (EC 3.2.1.45) (Beta-glucocerebrosidase) (Acid beta-glucosidase) (D-glucosyl-N-acylsphingosine glucohydrolase) (Alglucerase) (Imiglucerase) | GLCM_HUMAN | 59700  | 100% | 4  | 4  | 6  | 10.40% |
| TPC1-p15 | (P04062) Glucosylceramidase precursor (EC 3.2.1.45) (Beta-glucocerebrosidase) (Acid beta-glucosidase) (D-glucosyl-N-acylsphingosine glucohydrolase) (Alglucerase) (Imiglucerase) | GLCM_HUMAN | 59700  | 100% | 2  | 2  | 3  | 3.92%  |
| TPC1-p15 | (P04062) Glucosylceramidase precursor (EC 3.2.1.45) (Beta-glucocerebrosidase) (Acid beta-glucosidase) (D-glucosyl-N-acylsphingosine glucohydrolase) (Alglucerase) (Imiglucerase) | GLCM_HUMAN | 59700  | 100% | 6  | 6  | 6  | 17.40% |
| TPC1-p15 | (P04062) Glucosylceramidase precursor (EC 3.2.1.45) (Beta-glucocerebrosidase) (Acid beta-glucosidase) (D-glucosyl-N-acylsphingosine glucohydrolase) (Alglucerase) (Imiglucerase) | GLCM_HUMAN | 59700  | 100% | 2  | 2  | 4  | 5.04%  |
| TPC1-p15 | (P04062) Glucosylceramidase precursor (EC 3.2.1.45) (Beta-glucocerebrosidase) (Acid beta-glucosidase) (D-glucosyl-N-acylsphingosine glucohydrolase) (Alglucerase) (Imiglucerase) | GLCM_HUMAN | 59700  | 100% | 2  | 2  | 4  | 9.14%  |
| TPC1-p15 | (P04062) Glucosylceramidase precursor (EC 3.2.1.45) (Beta-glucocerebrosidase) (Acid beta-glucosidase) (D-glucosyl-N-acylsphingosine glucohydrolase) (Alglucerase) (Imiglucerase) | GLCM_HUMAN | 59700  | 100% | 4  | 5  | 16 | 12.30% |
| TPC1-p15 | (P04062) Glucosylceramidase precursor (EC 3.2.1.45) (Beta-glucocerebrosidase) (Acid beta-glucosidase) (D-glucosyl-N-acylsphingosine glucohydrolase) (Alglucerase) (Imiglucerase) | GLCM_HUMAN | 59700  | 100% | 4  | 6  | 11 | 12.30% |

## Protein Identified Sequence Coverage in TPC-1

|          |                                                                                                                                                                                  |             |       |      |   |   |    |        |
|----------|----------------------------------------------------------------------------------------------------------------------------------------------------------------------------------|-------------|-------|------|---|---|----|--------|
| TPC1-p15 | (P04062) Glucosylceramidase precursor (EC 3.2.1.45) (Beta-glucocerebrosidase) (Acid beta-glucosidase) (D-glucosyl-N-acylsphingosine glucohydrolase) (Alglucerase) (Imiglucerase) | GLCM_HUMAN  | 59700 | 100% | 4 | 5 | 13 | 12.30% |
| TPC1-p15 | (P04062) Glucosylceramidase precursor (EC 3.2.1.45) (Beta-glucocerebrosidase) (Acid beta-glucosidase) (D-glucosyl-N-acylsphingosine glucohydrolase) (Alglucerase) (Imiglucerase) | GLCM_HUMAN  | 59700 | 100% | 2 | 2 | 5  | 9.33%  |
| TPC1-p15 | (P04062) Glucosylceramidase precursor (EC 3.2.1.45) (Beta-glucocerebrosidase) (Acid beta-glucosidase) (D-glucosyl-N-acylsphingosine glucohydrolase) (Alglucerase) (Imiglucerase) | GLCM_HUMAN  | 59700 | 100% | 2 | 3 | 6  | 7.65%  |
| TPC1-p15 | (P04062) Glucosylceramidase precursor (EC 3.2.1.45) (Beta-glucocerebrosidase) (Acid beta-glucosidase) (D-glucosyl-N-acylsphingosine glucohydrolase) (Alglucerase) (Imiglucerase) | GLCM_HUMAN  | 59700 | 100% | 2 | 3 | 9  | 6.72%  |
| TPC1-p15 | (P04075) Fructose-bisphosphate aldolase A (EC 4.1.2.13) (Muscle-type aldolase) (Lung cancer antigen NY-LU-1)                                                                     | ALDOA_HUMAN | 39271 | 100% | 2 | 3 | 4  | 9.64%  |
| TPC1-p15 | (P04083) Annexin A1 (Annexin I) (Lipocortin I) (Calpactin II) (Chromobindin-9) (p35) (Phospholipase A2 inhibitory protein)                                                       | ANXA1_HUMAN | 38567 | 100% | 8 | 9 | 15 | 40.90% |
| TPC1-p15 | (P04083) Annexin A1 (Annexin I) (Lipocortin I) (Calpactin II) (Chromobindin-9) (p35) (Phospholipase A2 inhibitory protein)                                                       | ANXA1_HUMAN | 38567 | 100% | 4 | 4 | 6  | 22.60% |
| TPC1-p15 | (P04083) Annexin A1 (Annexin I) (Lipocortin I) (Calpactin II) (Chromobindin-9) (p35) (Phospholipase A2 inhibitory protein)                                                       | ANXA1_HUMAN | 38567 | 100% | 4 | 4 | 4  | 22.60% |
| TPC1-p15 | (P04083) Annexin A1 (Annexin I) (Lipocortin I) (Calpactin II) (Chromobindin-9) (p35) (Phospholipase A2 inhibitory protein)                                                       | ANXA1_HUMAN | 38567 | 100% | 7 | 7 | 11 | 36.50% |
| TPC1-p15 | (P04083) Annexin A1 (Annexin I) (Lipocortin I) (Calpactin II) (Chromobindin-9) (p35) (Phospholipase A2 inhibitory protein)                                                       | ANXA1_HUMAN | 38567 | 100% | 2 | 2 | 3  | 12.50% |
| TPC1-p15 | (P04083) Annexin A1 (Annexin I) (Lipocortin I) (Calpactin II) (Chromobindin-9) (p35) (Phospholipase A2 inhibitory protein)                                                       | ANXA1_HUMAN | 38567 | 100% | 2 | 3 | 10 | 12.50% |
| TPC1-p15 | (P04083) Annexin A1 (Annexin I) (Lipocortin I) (Calpactin II) (Chromobindin-9) (p35) (Phospholipase A2 inhibitory protein)                                                       | ANXA1_HUMAN | 38567 | 100% | 2 | 2 | 9  | 13.00% |
| TPC1-p15 | (P04083) Annexin A1 (Annexin I) (Lipocortin I) (Calpactin II) (Chromobindin-9) (p35) (Phospholipase A2 inhibitory protein)                                                       | ANXA1_HUMAN | 38567 | 100% | 3 | 4 | 6  | 19.70% |
| TPC1-p15 | (P04179) Superoxide dismutase [Mn], mitochondrial precursor (EC 1.15.1.1)                                                                                                        | SODM_HUMAN  | 24705 | 100% | 2 | 2 | 3  | 10.40% |
| TPC1-p15 | (P04179) Superoxide dismutase [Mn], mitochondrial precursor (EC 1.15.1.1)                                                                                                        | SODM_HUMAN  | 24705 | 100% | 3 | 3 | 3  | 19.40% |
| TPC1-p15 | (P04179) Superoxide dismutase [Mn], mitochondrial precursor (EC 1.15.1.1)                                                                                                        | SODM_HUMAN  | 24705 | 100% | 2 | 2 | 2  | 13.10% |

## Protein Identified Sequence Coverage in TPC-1

|          |                                                                                                                                                                                                                                                       |            |       |      |    |    |    |        |
|----------|-------------------------------------------------------------------------------------------------------------------------------------------------------------------------------------------------------------------------------------------------------|------------|-------|------|----|----|----|--------|
| TPC1-p15 | (P04406) Glyceraldehyde-3-phosphate dehydrogenase (EC 1.2.1.12) (GAPDH)                                                                                                                                                                               | G3P_HUMAN  | 35904 | 100% | 5  | 6  | 9  | 26.60% |
| TPC1-p15 | (P04406) Glyceraldehyde-3-phosphate dehydrogenase (EC 1.2.1.12) (GAPDH)                                                                                                                                                                               | G3P_HUMAN  | 35904 | 100% | 2  | 2  | 4  | 8.68%  |
| TPC1-p15 | (P04406) Glyceraldehyde-3-phosphate dehydrogenase (EC 1.2.1.12) (GAPDH)                                                                                                                                                                               | G3P_HUMAN  | 35904 | 100% | 4  | 5  | 5  | 22.20% |
| TPC1-p15 | (P04406) Glyceraldehyde-3-phosphate dehydrogenase (EC 1.2.1.12) (GAPDH)                                                                                                                                                                               | G3P_HUMAN  | 35904 | 100% | 2  | 2  | 2  | 18.00% |
| TPC1-p15 | (P04406) Glyceraldehyde-3-phosphate dehydrogenase (EC 1.2.1.12) (GAPDH)                                                                                                                                                                               | G3P_HUMAN  | 35904 | 100% | 2  | 2  | 2  | 12.60% |
| TPC1-p15 | (P04406) Glyceraldehyde-3-phosphate dehydrogenase (EC 1.2.1.12) (GAPDH)                                                                                                                                                                               | G3P_HUMAN  | 35904 | 100% | 2  | 2  | 3  | 8.38%  |
| TPC1-p15 | (P04406) Glyceraldehyde-3-phosphate dehydrogenase (EC 1.2.1.12) (GAPDH)                                                                                                                                                                               | G3P_HUMAN  | 35904 | 100% | 2  | 2  | 5  | 15.60% |
| TPC1-p15 | (P04406) Glyceraldehyde-3-phosphate dehydrogenase (EC 1.2.1.12) (GAPDH)                                                                                                                                                                               | G3P_HUMAN  | 35904 | 100% | 2  | 2  | 3  | 8.68%  |
| TPC1-p15 | (P04406) Glyceraldehyde-3-phosphate dehydrogenase (EC 1.2.1.12) (GAPDH)                                                                                                                                                                               | G3P_HUMAN  | 35904 | 100% | 2  | 2  | 7  | 15.60% |
| TPC1-p15 | (P05067) Amyloid beta A4 protein precursor (APP) (ABPP) (Alzheimer disease amyloid protein) (Cerebral vascular amyloid peptide) (CVAP) (Protease nexin-II) (PN-II) (APPI) (PreA4) [Contains: Soluble APP-alpha (S-APP-alpha); Soluble APP-beta (S-APP | A4_HUMAN   | 86923 | 100% | 3  | 3  | 3  | 4.16%  |
| TPC1-p15 | (P05106) Integrin beta-3 precursor (Platelet membrane glycoprotein IIIa) (GPIIIa) (CD61 antigen)                                                                                                                                                      | ITB3_HUMAN | 87196 | 100% | 9  | 9  | 13 | 20.10% |
| TPC1-p15 | (P05106) Integrin beta-3 precursor (Platelet membrane glycoprotein IIIa) (GPIIIa) (CD61 antigen)                                                                                                                                                      | ITB3_HUMAN | 87196 | 100% | 10 | 10 | 17 | 18.40% |
| TPC1-p15 | (P05106) Integrin beta-3 precursor (Platelet membrane glycoprotein IIIa) (GPIIIa) (CD61 antigen)                                                                                                                                                      | ITB3_HUMAN | 87196 | 100% | 9  | 9  | 10 | 17.40% |
| TPC1-p15 | (P05106) Integrin beta-3 precursor (Platelet membrane glycoprotein IIIa) (GPIIIa) (CD61 antigen)                                                                                                                                                      | ITB3_HUMAN | 87196 | 100% | 8  | 8  | 20 | 13.20% |
| TPC1-p15 | (P05106) Integrin beta-3 precursor (Platelet membrane glycoprotein IIIa) (GPIIIa) (CD61 antigen)                                                                                                                                                      | ITB3_HUMAN | 87196 | 100% | 4  | 4  | 6  | 12.10% |
| TPC1-p15 | (P05106) Integrin beta-3 precursor (Platelet membrane glycoprotein IIIa) (GPIIIa) (CD61 antigen)                                                                                                                                                      | ITB3_HUMAN | 87196 | 100% | 4  | 5  | 5  | 11.90% |
| TPC1-p15 | (P05106) Integrin beta-3 precursor (Platelet membrane glycoprotein IIIa) (GPIIIa) (CD61 antigen)                                                                                                                                                      | ITB3_HUMAN | 87196 | 100% | 4  | 6  | 9  | 11.20% |
| TPC1-p15 | (P05106) Integrin beta-3 precursor (Platelet membrane glycoprotein IIIa) (GPIIIa) (CD61 antigen)                                                                                                                                                      | ITB3_HUMAN | 87196 | 100% | 4  | 5  | 7  | 10.70% |

Protein Identified Sequence Coverage in TPC-1

|          |                                                                                                                     |             |       |      |    |    |    |        |
|----------|---------------------------------------------------------------------------------------------------------------------|-------------|-------|------|----|----|----|--------|
| TPC1-p15 | (P05106) Integrin beta-3 precursor (Platelet membrane glycoprotein IIIa) (GPIIIa) (CD61 antigen)                    | ITB3_HUMAN  | 87196 | 100% | 3  | 3  | 6  | 11.20% |
| TPC1-p15 | (P05106) Integrin beta-3 precursor (Platelet membrane glycoprotein IIIa) (GPIIIa) (CD61 antigen)                    | ITB3_HUMAN  | 87196 | 100% | 4  | 4  | 6  | 9.01%  |
| TPC1-p15 | (P05106) Integrin beta-3 precursor (Platelet membrane glycoprotein IIIa) (GPIIIa) (CD61 antigen)                    | ITB3_HUMAN  | 87196 | 100% | 5  | 5  | 11 | 12.10% |
| TPC1-p15 | (P05106) Integrin beta-3 precursor (Platelet membrane glycoprotein IIIa) (GPIIIa) (CD61 antigen)                    | ITB3_HUMAN  | 87196 | 100% | 3  | 3  | 3  | 7.36%  |
| TPC1-p15 | (P05106) Integrin beta-3 precursor (Platelet membrane glycoprotein IIIa) (GPIIIa) (CD61 antigen)                    | ITB3_HUMAN  | 87196 | 100% | 2  | 3  | 7  | 8.63%  |
| TPC1-p15 | (P05362) Intercellular adhesion molecule 1 precursor (ICAM-1) (Major group rhinovirus receptor) (CD54 antigen)      | ICAM1_HUMAN | 57807 | 100% | 2  | 2  | 3  | 5.64%  |
| TPC1-p15 | (P05362) Intercellular adhesion molecule 1 precursor (ICAM-1) (Major group rhinovirus receptor) (CD54 antigen)      | ICAM1_HUMAN | 57807 | 100% | 4  | 4  | 4  | 15.60% |
| TPC1-p15 | (P05362) Intercellular adhesion molecule 1 precursor (ICAM-1) (Major group rhinovirus receptor) (CD54 antigen)      | ICAM1_HUMAN | 57807 | 100% | 3  | 3  | 3  | 7.52%  |
| TPC1-p15 | (P05362) Intercellular adhesion molecule 1 precursor (ICAM-1) (Major group rhinovirus receptor) (CD54 antigen)      | ICAM1_HUMAN | 57807 | 100% | 2  | 2  | 4  | 8.83%  |
| TPC1-p15 | (P05362) Intercellular adhesion molecule 1 precursor (ICAM-1) (Major group rhinovirus receptor) (CD54 antigen)      | ICAM1_HUMAN | 57807 | 100% | 4  | 4  | 7  | 17.10% |
| TPC1-p15 | (P05362) Intercellular adhesion molecule 1 precursor (ICAM-1) (Major group rhinovirus receptor) (CD54 antigen)      | ICAM1_HUMAN | 57807 | 100% | 2  | 2  | 4  | 4.51%  |
| TPC1-p15 | (P05362) Intercellular adhesion molecule 1 precursor (ICAM-1) (Major group rhinovirus receptor) (CD54 antigen)      | ICAM1_HUMAN | 57807 | 100% | 2  | 2  | 4  | 6.20%  |
| TPC1-p15 | (P05362) Intercellular adhesion molecule 1 precursor (ICAM-1) (Major group rhinovirus receptor) (CD54 antigen)      | ICAM1_HUMAN | 57807 | 100% | 4  | 4  | 21 | 13.90% |
| TPC1-p15 | (P05387) 60S acidic ribosomal protein P2 (NY-REN-44 antigen)                                                        | RLA2_HUMAN  | 11647 | 100% | 2  | 2  | 2  | 39.10% |
| TPC1-p15 | (P05556) Integrin beta-1 precursor (Fibronectin receptor beta subunit) (Integrin VLA-4 beta subunit) (CD29 antigen) | ITB1_HUMAN  | 88447 | 100% | 16 | 18 | 34 | 26.70% |
| TPC1-p15 | (P05556) Integrin beta-1 precursor (Fibronectin receptor beta subunit) (Integrin VLA-4 beta subunit) (CD29 antigen) | ITB1_HUMAN  | 88447 | 100% | 17 | 22 | 40 | 31.50% |

Protein Identified Sequence Coverage in TPC-1

|          |                                                                                                                                                                                                                            |             |        |      |    |    |    |        |
|----------|----------------------------------------------------------------------------------------------------------------------------------------------------------------------------------------------------------------------------|-------------|--------|------|----|----|----|--------|
| TPC1-p15 | (P05556) Integrin beta-1 precursor (Fibronectin receptor beta subunit) (Integrin VLA-4 beta subunit) (CD29 antigen)                                                                                                        | ITB1_HUMAN  | 88447  | 100% | 15 | 16 | 24 | 27.70% |
| TPC1-p15 | (P05556) Integrin beta-1 precursor (Fibronectin receptor beta subunit) (Integrin VLA-4 beta subunit) (CD29 antigen)                                                                                                        | ITB1_HUMAN  | 88447  | 100% | 13 | 15 | 35 | 18.50% |
| TPC1-p15 | (P05556) Integrin beta-1 precursor (Fibronectin receptor beta subunit) (Integrin VLA-4 beta subunit) (CD29 antigen)                                                                                                        | ITB1_HUMAN  | 88447  | 100% | 5  | 5  | 13 | 14.30% |
| TPC1-p15 | (P05556) Integrin beta-1 precursor (Fibronectin receptor beta subunit) (Integrin VLA-4 beta subunit) (CD29 antigen)                                                                                                        | ITB1_HUMAN  | 88447  | 100% | 11 | 14 | 25 | 19.30% |
| TPC1-p15 | (P05556) Integrin beta-1 precursor (Fibronectin receptor beta subunit) (Integrin VLA-4 beta subunit) (CD29 antigen)                                                                                                        | ITB1_HUMAN  | 88447  | 100% | 13 | 15 | 28 | 20.60% |
| TPC1-p15 | (P05556) Integrin beta-1 precursor (Fibronectin receptor beta subunit) (Integrin VLA-4 beta subunit) (CD29 antigen)                                                                                                        | ITB1_HUMAN  | 88447  | 100% | 8  | 10 | 22 | 12.40% |
| TPC1-p15 | (P05556) Integrin beta-1 precursor (Fibronectin receptor beta subunit) (Integrin VLA-4 beta subunit) (CD29 antigen)                                                                                                        | ITB1_HUMAN  | 88447  | 100% | 5  | 5  | 12 | 9.90%  |
| TPC1-p15 | (P05556) Integrin beta-1 precursor (Fibronectin receptor beta subunit) (Integrin VLA-4 beta subunit) (CD29 antigen)                                                                                                        | ITB1_HUMAN  | 88447  | 100% | 10 | 11 | 41 | 18.40% |
| TPC1-p15 | (P05556) Integrin beta-1 precursor (Fibronectin receptor beta subunit) (Integrin VLA-4 beta subunit) (CD29 antigen)                                                                                                        | ITB1_HUMAN  | 88447  | 100% | 6  | 8  | 53 | 15.00% |
| TPC1-p15 | (P05556) Integrin beta-1 precursor (Fibronectin receptor beta subunit) (Integrin VLA-4 beta subunit) (CD29 antigen)                                                                                                        | ITB1_HUMAN  | 88447  | 100% | 3  | 5  | 60 | 8.40%  |
| TPC1-p15 | (P05556) Integrin beta-1 precursor (Fibronectin receptor beta subunit) (Integrin VLA-4 beta subunit) (CD29 antigen)                                                                                                        | ITB1_HUMAN  | 88447  | 100% | 4  | 7  | 54 | 7.77%  |
| TPC1-p15 | (P05556) Integrin beta-1 precursor (Fibronectin receptor beta subunit) (Integrin VLA-4 beta subunit) (CD29 antigen)                                                                                                        | ITB1_HUMAN  | 88447  | 100% | 4  | 4  | 9  | 5.51%  |
| TPC1-p15 | (P05997) Collagen alpha-2(V) chain precursor                                                                                                                                                                               | CO5A2_HUMAN | 144702 | 100% | 2  | 2  | 3  | 2.94%  |
| TPC1-p15 | (P05997) Collagen alpha-2(V) chain precursor                                                                                                                                                                               | CO5A2_HUMAN | 144702 | 100% | 2  | 2  | 3  | 2.07%  |
| TPC1-p15 | (P06703) Protein S100-A6 (S100 calcium-binding protein A6) (Calcyclin) (Prolactin receptor-associated protein) (PRA) (Growth factor-inducible protein 2A9) (MLN 4)                                                         | S10A6_HUMAN | 10162  | 100% | 2  | 2  | 3  | 16.70% |
| TPC1-p15 | (P06733) Alpha-enolase (EC 4.2.1.11) (2-phospho-D-glycerate hydro-lyase) (Non-neural enolase) (NNE) (Enolase 1) (Phosphopyruvate hydratase) (C-myc promoter-binding protein) (MBP-1) (MPB-1) (Plasminogen-binding protein) | ENOA_HUMAN  | 47021  | 100% | 3  | 3  | 5  | 10.90% |

## Protein Identified Sequence Coverage in TPC-1

|          |                                                                                                                                                                                                                            |            |       |      |   |   |    |        |
|----------|----------------------------------------------------------------------------------------------------------------------------------------------------------------------------------------------------------------------------|------------|-------|------|---|---|----|--------|
| TPC1-p15 | (P06733) Alpha-enolase (EC 4.2.1.11) (2-phospho-D-glycerate hydro-lyase) (Non-neural enolase) (NNE) (Enolase 1) (Phosphopyruvate hydratase) (C-myc promoter-binding protein) (MBP-1) (MPB-1) (Plasminogen-binding protein) | ENOA_HUMAN | 47021 | 100% | 6 | 6 | 9  | 25.40% |
| TPC1-p15 | (P06733) Alpha-enolase (EC 4.2.1.11) (2-phospho-D-glycerate hydro-lyase) (Non-neural enolase) (NNE) (Enolase 1) (Phosphopyruvate hydratase) (C-myc promoter-binding protein) (MBP-1) (MPB-1) (Plasminogen-binding protein) | ENOA_HUMAN | 47021 | 100% | 4 | 4 | 4  | 15.90% |
| TPC1-p15 | (P06733) Alpha-enolase (EC 4.2.1.11) (2-phospho-D-glycerate hydro-lyase) (Non-neural enolase) (NNE) (Enolase 1) (Phosphopyruvate hydratase) (C-myc promoter-binding protein) (MBP-1) (MPB-1) (Plasminogen-binding protein) | ENOA_HUMAN | 47021 | 100% | 5 | 5 | 9  | 18.50% |
| TPC1-p15 | (P06733) Alpha-enolase (EC 4.2.1.11) (2-phospho-D-glycerate hydro-lyase) (Non-neural enolase) (NNE) (Enolase 1) (Phosphopyruvate hydratase) (C-myc promoter-binding protein) (MBP-1) (MPB-1) (Plasminogen-binding protein) | ENOA_HUMAN | 47021 | 100% | 2 | 2 | 3  | 12.00% |
| TPC1-p15 | (P06733) Alpha-enolase (EC 4.2.1.11) (2-phospho-D-glycerate hydro-lyase) (Non-neural enolase) (NNE) (Enolase 1) (Phosphopyruvate hydratase) (C-myc promoter-binding protein) (MBP-1) (MPB-1) (Plasminogen-binding protein) | ENOA_HUMAN | 47021 | 100% | 5 | 6 | 10 | 19.60% |
| TPC1-p15 | (P06733) Alpha-enolase (EC 4.2.1.11) (2-phospho-D-glycerate hydro-lyase) (Non-neural enolase) (NNE) (Enolase 1) (Phosphopyruvate hydratase) (C-myc promoter-binding protein) (MBP-1) (MPB-1) (Plasminogen-binding protein) | ENOA_HUMAN | 47021 | 100% | 4 | 6 | 9  | 17.80% |
| TPC1-p15 | (P06733) Alpha-enolase (EC 4.2.1.11) (2-phospho-D-glycerate hydro-lyase) (Non-neural enolase) (NNE) (Enolase 1) (Phosphopyruvate hydratase) (C-myc promoter-binding protein) (MBP-1) (MPB-1) (Plasminogen-binding protein) | ENOA_HUMAN | 47021 | 100% | 2 | 2 | 3  | 8.08%  |
| TPC1-p15 | (P06748) Nucleophosmin (NPM) (Nucleolar phosphoprotein B23) (Numatrin) (Nucleolar protein NO38)                                                                                                                            | NPM_HUMAN  | 32557 | 100% | 2 | 2 | 4  | 11.90% |
| TPC1-p15 | (P06748) Nucleophosmin (NPM) (Nucleolar phosphoprotein B23) (Numatrin) (Nucleolar protein NO38)                                                                                                                            | NPM_HUMAN  | 32557 | 100% | 3 | 3 | 4  | 21.40% |
| TPC1-p15 | (P06748) Nucleophosmin (NPM) (Nucleolar phosphoprotein B23) (Numatrin) (Nucleolar protein NO38)                                                                                                                            | NPM_HUMAN  | 32557 | 100% | 3 | 3 | 3  | 16.30% |
| TPC1-p15 | (P06748) Nucleophosmin (NPM) (Nucleolar phosphoprotein B23) (Numatrin) (Nucleolar protein NO38)                                                                                                                            | NPM_HUMAN  | 32557 | 100% | 3 | 3 | 5  | 18.70% |

## Protein Identified Sequence Coverage in TPC-1

|          |                                                                                                                                                   |            |       |      |    |    |    |        |
|----------|---------------------------------------------------------------------------------------------------------------------------------------------------|------------|-------|------|----|----|----|--------|
| TPC1-p15 | (P06748) Nucleophosmin (NPM) (Nucleolar phosphoprotein B23) (Numatrin) (Nucleolar protein NO38)                                                   | NPM_HUMAN  | 32557 | 100% | 2  | 3  | 11 | 11.90% |
| TPC1-p15 | (P06748) Nucleophosmin (NPM) (Nucleolar phosphoprotein B23) (Numatrin) (Nucleolar protein NO38)                                                   | NPM_HUMAN  | 32557 | 100% | 2  | 3  | 4  | 13.60% |
| TPC1-p15 | (P06865) Beta-hexosaminidase alpha chain precursor (EC 3.2.1.52) (N-acetyl-beta-glucosaminidase) (Beta-N-acetylhexosaminidase) (Hexosaminidase A) | HEXA_HUMAN | 60672 | 100% | 14 | 17 | 33 | 35.90% |
| TPC1-p15 | (P06865) Beta-hexosaminidase alpha chain precursor (EC 3.2.1.52) (N-acetyl-beta-glucosaminidase) (Beta-N-acetylhexosaminidase) (Hexosaminidase A) | HEXA_HUMAN | 60672 | 100% | 11 | 12 | 23 | 25.70% |
| TPC1-p15 | (P06865) Beta-hexosaminidase alpha chain precursor (EC 3.2.1.52) (N-acetyl-beta-glucosaminidase) (Beta-N-acetylhexosaminidase) (Hexosaminidase A) | HEXA_HUMAN | 60672 | 100% | 10 | 11 | 12 | 23.10% |
| TPC1-p15 | (P06865) Beta-hexosaminidase alpha chain precursor (EC 3.2.1.52) (N-acetyl-beta-glucosaminidase) (Beta-N-acetylhexosaminidase) (Hexosaminidase A) | HEXA_HUMAN | 60672 | 100% | 11 | 12 | 20 | 23.60% |
| TPC1-p15 | (P06865) Beta-hexosaminidase alpha chain precursor (EC 3.2.1.52) (N-acetyl-beta-glucosaminidase) (Beta-N-acetylhexosaminidase) (Hexosaminidase A) | HEXA_HUMAN | 60672 | 100% | 3  | 3  | 7  | 11.70% |
| TPC1-p15 | (P06865) Beta-hexosaminidase alpha chain precursor (EC 3.2.1.52) (N-acetyl-beta-glucosaminidase) (Beta-N-acetylhexosaminidase) (Hexosaminidase A) | HEXA_HUMAN | 60672 | 100% | 2  | 3  | 6  | 3.40%  |
| TPC1-p15 | (P06865) Beta-hexosaminidase alpha chain precursor (EC 3.2.1.52) (N-acetyl-beta-glucosaminidase) (Beta-N-acetylhexosaminidase) (Hexosaminidase A) | HEXA_HUMAN | 60672 | 100% | 2  | 3  | 4  | 3.40%  |
| TPC1-p15 | (P06865) Beta-hexosaminidase alpha chain precursor (EC 3.2.1.52) (N-acetyl-beta-glucosaminidase) (Beta-N-acetylhexosaminidase) (Hexosaminidase A) | HEXA_HUMAN | 60672 | 100% | 4  | 5  | 7  | 8.70%  |
| TPC1-p15 | (P06865) Beta-hexosaminidase alpha chain precursor (EC 3.2.1.52) (N-acetyl-beta-glucosaminidase) (Beta-N-acetylhexosaminidase) (Hexosaminidase A) | HEXA_HUMAN | 60672 | 100% | 7  | 9  | 14 | 27.20% |
| TPC1-p15 | (P06865) Beta-hexosaminidase alpha chain precursor (EC 3.2.1.52) (N-acetyl-beta-glucosaminidase) (Beta-N-acetylhexosaminidase) (Hexosaminidase A) | HEXA_HUMAN | 60672 | 100% | 6  | 9  | 15 | 18.00% |



## Protein Identified Sequence Coverage in TPC-1

|          |                                                                                                                                                        |             |       |      |    |    |     |        |
|----------|--------------------------------------------------------------------------------------------------------------------------------------------------------|-------------|-------|------|----|----|-----|--------|
| TPC1-p15 | (P06865) Beta-hexosaminidase alpha chain precursor (EC 3.2.1.52) (N-acetyl-beta-glucosaminidase) (Beta-N-acetylhexosaminidase) (Hexosaminidase A)      | HEXA_HUMAN  | 60672 | 100% | 4  | 6  | 15  | 14.90% |
| TPC1-p15 | (P07237) Protein disulfide-isomerase precursor (EC 5.3.4.1) (PDI) (Prolyl 4-hydroxylase beta subunit) (Cellular thyroid hormone-binding protein) (p55) | PDIA1_HUMAN | 57100 | 100% | 3  | 4  | 6   | 11.00% |
| TPC1-p15 | (P07237) Protein disulfide-isomerase precursor (EC 5.3.4.1) (PDI) (Prolyl 4-hydroxylase beta subunit) (Cellular thyroid hormone-binding protein) (p55) | PDIA1_HUMAN | 57100 | 100% | 2  | 2  | 2   | 9.06%  |
| TPC1-p15 | (P07237) Protein disulfide-isomerase precursor (EC 5.3.4.1) (PDI) (Prolyl 4-hydroxylase beta subunit) (Cellular thyroid hormone-binding protein) (p55) | PDIA1_HUMAN | 57100 | 100% | 2  | 3  | 4   | 8.27%  |
| TPC1-p15 | (P07237) Protein disulfide-isomerase precursor (EC 5.3.4.1) (PDI) (Prolyl 4-hydroxylase beta subunit) (Cellular thyroid hormone-binding protein) (p55) | PDIA1_HUMAN | 57100 | 100% | 2  | 3  | 5   | 8.27%  |
| TPC1-p15 | (P07339) Cathepsin D precursor (EC 3.4.23.5) [Contains: Cathepsin D light chain; Cathepsin D heavy chain]                                              | CATD_HUMAN  | 44535 | 100% | 17 | 24 | 96  | 63.60% |
| TPC1-p15 | (P07339) Cathepsin D precursor (EC 3.4.23.5) [Contains: Cathepsin D light chain; Cathepsin D heavy chain]                                              | CATD_HUMAN  | 44535 | 100% | 15 | 19 | 65  | 51.90% |
| TPC1-p15 | (P07339) Cathepsin D precursor (EC 3.4.23.5) [Contains: Cathepsin D light chain; Cathepsin D heavy chain]                                              | CATD_HUMAN  | 44535 | 100% | 17 | 22 | 55  | 58.50% |
| TPC1-p15 | (P07339) Cathepsin D precursor (EC 3.4.23.5) [Contains: Cathepsin D light chain; Cathepsin D heavy chain]                                              | CATD_HUMAN  | 44535 | 100% | 15 | 17 | 66  | 49.80% |
| TPC1-p15 | (P07339) Cathepsin D precursor (EC 3.4.23.5) [Contains: Cathepsin D light chain; Cathepsin D heavy chain]                                              | CATD_HUMAN  | 44535 | 100% | 3  | 3  | 19  | 14.80% |
| TPC1-p15 | (P07339) Cathepsin D precursor (EC 3.4.23.5) [Contains: Cathepsin D light chain; Cathepsin D heavy chain]                                              | CATD_HUMAN  | 44535 | 100% | 10 | 13 | 29  | 28.90% |
| TPC1-p15 | (P07339) Cathepsin D precursor (EC 3.4.23.5) [Contains: Cathepsin D light chain; Cathepsin D heavy chain]                                              | CATD_HUMAN  | 44535 | 100% | 8  | 11 | 29  | 21.60% |
| TPC1-p15 | (P07339) Cathepsin D precursor (EC 3.4.23.5) [Contains: Cathepsin D light chain; Cathepsin D heavy chain]                                              | CATD_HUMAN  | 44535 | 100% | 9  | 11 | 31  | 23.30% |
| TPC1-p15 | (P07339) Cathepsin D precursor (EC 3.4.23.5) [Contains: Cathepsin D light chain; Cathepsin D heavy chain]                                              | CATD_HUMAN  | 44535 | 100% | 11 | 14 | 102 | 39.60% |

## Protein Identified Sequence Coverage in TPC-1

|          |                                                                                                                                                                   |             |       |      |    |    |     |        |
|----------|-------------------------------------------------------------------------------------------------------------------------------------------------------------------|-------------|-------|------|----|----|-----|--------|
| TPC1-p15 | (P07339) Cathepsin D precursor (EC 3.4.23.5)<br>[Contains: Cathepsin D light chain; Cathepsin D heavy chain]                                                      | CATD_HUMAN  | 44535 | 100% | 5  | 7  | 20  | 24.30% |
| TPC1-p15 | (P07339) Cathepsin D precursor (EC 3.4.23.5)<br>[Contains: Cathepsin D light chain; Cathepsin D heavy chain]                                                      | CATD_HUMAN  | 44535 | 100% | 9  | 11 | 209 | 36.90% |
| TPC1-p15 | (P07339) Cathepsin D precursor (EC 3.4.23.5)<br>[Contains: Cathepsin D light chain; Cathepsin D heavy chain]                                                      | CATD_HUMAN  | 44535 | 100% | 7  | 9  | 14  | 31.60% |
| TPC1-p15 | (P07339) Cathepsin D precursor (EC 3.4.23.5)<br>[Contains: Cathepsin D light chain; Cathepsin D heavy chain]                                                      | CATD_HUMAN  | 44535 | 100% | 6  | 9  | 103 | 27.90% |
| TPC1-p15 | (P07339) Cathepsin D precursor (EC 3.4.23.5)<br>[Contains: Cathepsin D light chain; Cathepsin D heavy chain]                                                      | CATD_HUMAN  | 44535 | 100% | 3  | 5  | 176 | 20.40% |
| TPC1-p15 | (P07339) Cathepsin D precursor (EC 3.4.23.5)<br>[Contains: Cathepsin D light chain; Cathepsin D heavy chain]                                                      | CATD_HUMAN  | 44535 | 100% | 3  | 5  | 66  | 20.40% |
| TPC1-p15 | (P07355) Annexin A2 (Annexin II) (Lipocortin II)<br>(Calpactin I heavy chain) (Chromobindin-8) (p36)<br>(Protein I) (Placental anticoagulant protein IV) (PAP-IV) | ANXA2_HUMAN | 38457 | 100% | 18 | 25 | 48  | 52.10% |
| TPC1-p15 | (P07355) Annexin A2 (Annexin II) (Lipocortin II)<br>(Calpactin I heavy chain) (Chromobindin-8) (p36)<br>(Protein I) (Placental anticoagulant protein IV) (PAP-IV) | ANXA2_HUMAN | 38457 | 100% | 20 | 25 | 46  | 63.00% |
| TPC1-p15 | (P07355) Annexin A2 (Annexin II) (Lipocortin II)<br>(Calpactin I heavy chain) (Chromobindin-8) (p36)<br>(Protein I) (Placental anticoagulant protein IV) (PAP-IV) | ANXA2_HUMAN | 38457 | 100% | 16 | 19 | 20  | 50.60% |
| TPC1-p15 | (P07355) Annexin A2 (Annexin II) (Lipocortin II)<br>(Calpactin I heavy chain) (Chromobindin-8) (p36)<br>(Protein I) (Placental anticoagulant protein IV) (PAP-IV) | ANXA2_HUMAN | 38457 | 100% | 18 | 21 | 49  | 57.70% |
| TPC1-p15 | (P07355) Annexin A2 (Annexin II) (Lipocortin II)<br>(Calpactin I heavy chain) (Chromobindin-8) (p36)<br>(Protein I) (Placental anticoagulant protein IV) (PAP-IV) | ANXA2_HUMAN | 38457 | 100% | 3  | 3  | 6   | 18.00% |
| TPC1-p15 | (P07355) Annexin A2 (Annexin II) (Lipocortin II)<br>(Calpactin I heavy chain) (Chromobindin-8) (p36)<br>(Protein I) (Placental anticoagulant protein IV) (PAP-IV) | ANXA2_HUMAN | 38457 | 100% | 5  | 5  | 7   | 23.10% |
| TPC1-p15 | (P07355) Annexin A2 (Annexin II) (Lipocortin II)<br>(Calpactin I heavy chain) (Chromobindin-8) (p36)<br>(Protein I) (Placental anticoagulant protein IV) (PAP-IV) | ANXA2_HUMAN | 38457 | 100% | 6  | 6  | 8   | 24.90% |

## Protein Identified Sequence Coverage in TPC-1

|          |                                                                                                                                                                                                                                                      |             |       |      |    |    |    |        |
|----------|------------------------------------------------------------------------------------------------------------------------------------------------------------------------------------------------------------------------------------------------------|-------------|-------|------|----|----|----|--------|
| TPC1-p15 | (P07355) Annexin A2 (Annexin II) (Lipocortin II) (Calpactin I heavy chain) (Chromobindin-8) (p36) (Protein I) (Placental anticoagulant protein IV) (PAP-IV)                                                                                          | ANXA2_HUMAN | 38457 | 100% | 9  | 12 | 47 | 32.00% |
| TPC1-p15 | (P07355) Annexin A2 (Annexin II) (Lipocortin II) (Calpactin I heavy chain) (Chromobindin-8) (p36) (Protein I) (Placental anticoagulant protein IV) (PAP-IV)                                                                                          | ANXA2_HUMAN | 38457 | 100% | 2  | 2  | 2  | 11.80% |
| TPC1-p15 | (P07355) Annexin A2 (Annexin II) (Lipocortin II) (Calpactin I heavy chain) (Chromobindin-8) (p36) (Protein I) (Placental anticoagulant protein IV) (PAP-IV)                                                                                          | ANXA2_HUMAN | 38457 | 100% | 6  | 8  | 40 | 22.50% |
| TPC1-p15 | (P07355) Annexin A2 (Annexin II) (Lipocortin II) (Calpactin I heavy chain) (Chromobindin-8) (p36) (Protein I) (Placental anticoagulant protein IV) (PAP-IV)                                                                                          | ANXA2_HUMAN | 38457 | 100% | 7  | 9  | 16 | 27.20% |
| TPC1-p15 | (P07355) Annexin A2 (Annexin II) (Lipocortin II) (Calpactin I heavy chain) (Chromobindin-8) (p36) (Protein I) (Placental anticoagulant protein IV) (PAP-IV)                                                                                          | ANXA2_HUMAN | 38457 | 100% | 3  | 5  | 31 | 16.90% |
| TPC1-p15 | (P07355) Annexin A2 (Annexin II) (Lipocortin II) (Calpactin I heavy chain) (Chromobindin-8) (p36) (Protein I) (Placental anticoagulant protein IV) (PAP-IV)                                                                                          | ANXA2_HUMAN | 38457 | 100% | 2  | 3  | 25 | 11.80% |
| TPC1-p15 | (P07437) Tubulin beta-2 chain                                                                                                                                                                                                                        | TBB2_HUMAN  | 49653 | 100% | 2  | 2  | 2  | 6.08%  |
| TPC1-p15 | (P07602) Proactivator polypeptide precursor [Contains: Saposin A (Protein A); Saposin B-Val; Saposin B (Sphingolipid activator protein 1) (SAP-1) (Cerebroside sulfate activator) (CSAct) (Dispersin) (Sulfatide/GM1 activator); Saposin C (Co-beta- | SAP_HUMAN   | 58094 | 100% | 9  | 11 | 45 | 24.80% |
| TPC1-p15 | (P07602) Proactivator polypeptide precursor [Contains: Saposin A (Protein A); Saposin B-Val; Saposin B (Sphingolipid activator protein 1) (SAP-1) (Cerebroside sulfate activator) (CSAct) (Dispersin) (Sulfatide/GM1 activator); Saposin C (Co-beta- | SAP_HUMAN   | 58094 | 100% | 12 | 13 | 54 | 31.50% |
| TPC1-p15 | (P07602) Proactivator polypeptide precursor [Contains: Saposin A (Protein A); Saposin B-Val; Saposin B (Sphingolipid activator protein 1) (SAP-1) (Cerebroside sulfate activator) (CSAct) (Dispersin) (Sulfatide/GM1 activator); Saposin C (Co-beta- | SAP_HUMAN   | 58094 | 100% | 12 | 13 | 44 | 32.10% |
| TPC1-p15 | (P07602) Proactivator polypeptide precursor [Contains: Saposin A (Protein A); Saposin B-Val; Saposin B (Sphingolipid activator protein 1) (SAP-1) (Cerebroside sulfate activator) (CSAct) (Dispersin) (Sulfatide/GM1 activator); Saposin C (Co-beta- | SAP_HUMAN   | 58094 | 100% | 8  | 8  | 59 | 21.00% |

Protein Identified Sequence Coverage in TPC-1

|          |                                                                                                                                                                                                                                                                  |           |       |      |    |    |     |        |
|----------|------------------------------------------------------------------------------------------------------------------------------------------------------------------------------------------------------------------------------------------------------------------|-----------|-------|------|----|----|-----|--------|
| TPC1-p15 | (P07602) Proactivator polypeptide precursor<br>[Contains: Saposin A (Protein A); Saposin B-Val;<br>Saposin B (Sphingolipid activator protein 1) (SAP-1)<br>(Cerebroside sulfate activator) (CSAct) (Dispersin)<br>(Sulfatide/GM1 activator); Saposin C (Co-beta- | SAP_HUMAN | 58094 | 100% | 4  | 4  | 13  | 18.30% |
| TPC1-p15 | (P07602) Proactivator polypeptide precursor<br>[Contains: Saposin A (Protein A); Saposin B-Val;<br>Saposin B (Sphingolipid activator protein 1) (SAP-1)<br>(Cerebroside sulfate activator) (CSAct) (Dispersin)<br>(Sulfatide/GM1 activator); Saposin C (Co-beta- | SAP_HUMAN | 58094 | 100% | 13 | 17 | 51  | 25.40% |
| TPC1-p15 | (P07602) Proactivator polypeptide precursor<br>[Contains: Saposin A (Protein A); Saposin B-Val;<br>Saposin B (Sphingolipid activator protein 1) (SAP-1)<br>(Cerebroside sulfate activator) (CSAct) (Dispersin)<br>(Sulfatide/GM1 activator); Saposin C (Co-beta- | SAP_HUMAN | 58094 | 100% | 12 | 17 | 56  | 24.00% |
| TPC1-p15 | (P07602) Proactivator polypeptide precursor<br>[Contains: Saposin A (Protein A); Saposin B-Val;<br>Saposin B (Sphingolipid activator protein 1) (SAP-1)<br>(Cerebroside sulfate activator) (CSAct) (Dispersin)<br>(Sulfatide/GM1 activator); Saposin C (Co-beta- | SAP_HUMAN | 58094 | 100% | 9  | 12 | 36  | 19.70% |
| TPC1-p15 | (P07602) Proactivator polypeptide precursor<br>[Contains: Saposin A (Protein A); Saposin B-Val;<br>Saposin B (Sphingolipid activator protein 1) (SAP-1)<br>(Cerebroside sulfate activator) (CSAct) (Dispersin)<br>(Sulfatide/GM1 activator); Saposin C (Co-beta- | SAP_HUMAN | 58094 | 100% | 6  | 6  | 14  | 18.90% |
| TPC1-p15 | (P07602) Proactivator polypeptide precursor<br>[Contains: Saposin A (Protein A); Saposin B-Val;<br>Saposin B (Sphingolipid activator protein 1) (SAP-1)<br>(Cerebroside sulfate activator) (CSAct) (Dispersin)<br>(Sulfatide/GM1 activator); Saposin C (Co-beta- | SAP_HUMAN | 58094 | 100% | 9  | 10 | 140 | 18.50% |
| TPC1-p15 | (P07602) Proactivator polypeptide precursor<br>[Contains: Saposin A (Protein A); Saposin B-Val;<br>Saposin B (Sphingolipid activator protein 1) (SAP-1)<br>(Cerebroside sulfate activator) (CSAct) (Dispersin)<br>(Sulfatide/GM1 activator); Saposin C (Co-beta- | SAP_HUMAN | 58094 | 100% | 8  | 9  | 138 | 24.80% |
| TPC1-p15 | (P07602) Proactivator polypeptide precursor<br>[Contains: Saposin A (Protein A); Saposin B-Val;<br>Saposin B (Sphingolipid activator protein 1) (SAP-1)<br>(Cerebroside sulfate activator) (CSAct) (Dispersin)<br>(Sulfatide/GM1 activator); Saposin C (Co-beta- | SAP_HUMAN | 58094 | 100% | 6  | 7  | 29  | 20.20% |

## Protein Identified Sequence Coverage in TPC-1

|          |                                                                                                                                                                                                                                                                      |            |       |      |    |    |    |        |
|----------|----------------------------------------------------------------------------------------------------------------------------------------------------------------------------------------------------------------------------------------------------------------------|------------|-------|------|----|----|----|--------|
| TPC1-p15 | (P07602) Proactivator polypeptide precursor<br>[Contains: Saposin A (Protein A); Saposin B-Val;<br>Saposin B (Sphingolipid activator protein 1) (SAP-1)<br>(Cerebroside sulfate activator) (CSAct) (Dispersin)<br>(Sulfatide/GM1 activator); Saposin C (Co-beta-     | SAP_HUMAN  | 58094 | 100% | 4  | 6  | 32 | 15.30% |
| TPC1-p15 | (P07602) Proactivator polypeptide precursor<br>[Contains: Saposin A (Protein A); Saposin B-Val;<br>Saposin B (Sphingolipid activator protein 1) (SAP-1)<br>(Cerebroside sulfate activator) (CSAct) (Dispersin)<br>(Sulfatide/GM1 activator); Saposin C (Co-beta-     | SAP_HUMAN  | 58094 | 100% | 4  | 4  | 6  | 17.20% |
| TPC1-p15 | (P07686) Beta-hexosaminidase beta chain precursor<br>(EC 3.2.1.52) (N-acetyl-beta-glucosaminidase) (Beta-<br>N-acetylhexosaminidase) (Hexosaminidase B)<br>(Cervical cancer proto-oncogene 7) (HCC-7)<br>[Contains: Beta-hexosaminidase beta-B chain; Beta-<br>hexos | HEXB_HUMAN | 63095 | 100% | 15 | 16 | 27 | 37.10% |
| TPC1-p15 | (P07686) Beta-hexosaminidase beta chain precursor<br>(EC 3.2.1.52) (N-acetyl-beta-glucosaminidase) (Beta-<br>N-acetylhexosaminidase) (Hexosaminidase B)<br>(Cervical cancer proto-oncogene 7) (HCC-7)<br>[Contains: Beta-hexosaminidase beta-B chain; Beta-<br>hexos | HEXB_HUMAN | 63095 | 100% | 11 | 12 | 24 | 29.70% |
| TPC1-p15 | (P07686) Beta-hexosaminidase beta chain precursor<br>(EC 3.2.1.52) (N-acetyl-beta-glucosaminidase) (Beta-<br>N-acetylhexosaminidase) (Hexosaminidase B)<br>(Cervical cancer proto-oncogene 7) (HCC-7)<br>[Contains: Beta-hexosaminidase beta-B chain; Beta-<br>hexos | HEXB_HUMAN | 63095 | 100% | 12 | 13 | 18 | 30.80% |
| TPC1-p15 | (P07686) Beta-hexosaminidase beta chain precursor<br>(EC 3.2.1.52) (N-acetyl-beta-glucosaminidase) (Beta-<br>N-acetylhexosaminidase) (Hexosaminidase B)<br>(Cervical cancer proto-oncogene 7) (HCC-7)<br>[Contains: Beta-hexosaminidase beta-B chain; Beta-<br>hexos | HEXB_HUMAN | 63095 | 100% | 9  | 9  | 19 | 22.30% |
| TPC1-p15 | (P07686) Beta-hexosaminidase beta chain precursor<br>(EC 3.2.1.52) (N-acetyl-beta-glucosaminidase) (Beta-<br>N-acetylhexosaminidase) (Hexosaminidase B)<br>(Cervical cancer proto-oncogene 7) (HCC-7)<br>[Contains: Beta-hexosaminidase beta-B chain; Beta-<br>hexos | HEXB_HUMAN | 63095 | 100% | 3  | 3  | 11 | 12.80% |

## Protein Identified Sequence Coverage in TPC-1

|          |                                                                                                                                                                                                                                                     |            |       |      |   |   |    |        |
|----------|-----------------------------------------------------------------------------------------------------------------------------------------------------------------------------------------------------------------------------------------------------|------------|-------|------|---|---|----|--------|
| TPC1-p15 | (P07686) Beta-hexosaminidase beta chain precursor (EC 3.2.1.52) (N-acetyl-beta-glucosaminidase) (Beta-N-acetylhexosaminidase) (Hexosaminidase B) (Cervical cancer proto-oncogene 7) (HCC-7) [Contains: Beta-hexosaminidase beta-B chain; Beta-hexos | HEXB_HUMAN | 63095 | 100% | 3 | 3 | 5  | 16.90% |
| TPC1-p15 | (P07686) Beta-hexosaminidase beta chain precursor (EC 3.2.1.52) (N-acetyl-beta-glucosaminidase) (Beta-N-acetylhexosaminidase) (Hexosaminidase B) (Cervical cancer proto-oncogene 7) (HCC-7) [Contains: Beta-hexosaminidase beta-B chain; Beta-hexos | HEXB_HUMAN | 63095 | 100% | 2 | 2 | 8  | 14.20% |
| TPC1-p15 | (P07686) Beta-hexosaminidase beta chain precursor (EC 3.2.1.52) (N-acetyl-beta-glucosaminidase) (Beta-N-acetylhexosaminidase) (Hexosaminidase B) (Cervical cancer proto-oncogene 7) (HCC-7) [Contains: Beta-hexosaminidase beta-B chain; Beta-hexos | HEXB_HUMAN | 63095 | 100% | 8 | 8 | 18 | 17.80% |
| TPC1-p15 | (P07686) Beta-hexosaminidase beta chain precursor (EC 3.2.1.52) (N-acetyl-beta-glucosaminidase) (Beta-N-acetylhexosaminidase) (Hexosaminidase B) (Cervical cancer proto-oncogene 7) (HCC-7) [Contains: Beta-hexosaminidase beta-B chain; Beta-hexos | HEXB_HUMAN | 63095 | 100% | 6 | 6 | 26 | 16.90% |
| TPC1-p15 | (P07686) Beta-hexosaminidase beta chain precursor (EC 3.2.1.52) (N-acetyl-beta-glucosaminidase) (Beta-N-acetylhexosaminidase) (Hexosaminidase B) (Cervical cancer proto-oncogene 7) (HCC-7) [Contains: Beta-hexosaminidase beta-B chain; Beta-hexos | HEXB_HUMAN | 63095 | 100% | 2 | 3 | 15 | 6.47%  |
| TPC1-p15 | (P07686) Beta-hexosaminidase beta chain precursor (EC 3.2.1.52) (N-acetyl-beta-glucosaminidase) (Beta-N-acetylhexosaminidase) (Hexosaminidase B) (Cervical cancer proto-oncogene 7) (HCC-7) [Contains: Beta-hexosaminidase beta-B chain; Beta-hexos | HEXB_HUMAN | 63095 | 100% | 3 | 4 | 17 | 10.30% |
| TPC1-p15 | (P07711) Cathepsin L precursor (EC 3.4.22.15) (Major excreted protein) (MEP) [Contains: Cathepsin L heavy chain; Cathepsin L light chain]                                                                                                           | CATL_HUMAN | 37546 | 100% | 3 | 3 | 4  | 18.00% |

## Protein Identified Sequence Coverage in TPC-1

|          |                                                                                                                                                    |            |       |      |    |    |    |        |
|----------|----------------------------------------------------------------------------------------------------------------------------------------------------|------------|-------|------|----|----|----|--------|
| TPC1-p15 | (P07711) Cathepsin L precursor (EC 3.4.22.15)<br>(Major excreted protein) (MEP) [Contains: Cathepsin L heavy chain; Cathepsin L light chain]       | CATL_HUMAN | 37546 | 100% | 6  | 6  | 7  | 30.30% |
| TPC1-p15 | (P07711) Cathepsin L precursor (EC 3.4.22.15)<br>(Major excreted protein) (MEP) [Contains: Cathepsin L heavy chain; Cathepsin L light chain]       | CATL_HUMAN | 37546 | 100% | 4  | 4  | 6  | 17.70% |
| TPC1-p15 | (P07711) Cathepsin L precursor (EC 3.4.22.15)<br>(Major excreted protein) (MEP) [Contains: Cathepsin L heavy chain; Cathepsin L light chain]       | CATL_HUMAN | 37546 | 100% | 2  | 2  | 3  | 13.80% |
| TPC1-p15 | (P07711) Cathepsin L precursor (EC 3.4.22.15)<br>(Major excreted protein) (MEP) [Contains: Cathepsin L heavy chain; Cathepsin L light chain]       | CATL_HUMAN | 37546 | 100% | 2  | 2  | 3  | 5.11%  |
| TPC1-p15 | (P07711) Cathepsin L precursor (EC 3.4.22.15)<br>(Major excreted protein) (MEP) [Contains: Cathepsin L heavy chain; Cathepsin L light chain]       | CATL_HUMAN | 37546 | 100% | 2  | 2  | 4  | 5.11%  |
| TPC1-p15 | (P07711) Cathepsin L precursor (EC 3.4.22.15)<br>(Major excreted protein) (MEP) [Contains: Cathepsin L heavy chain; Cathepsin L light chain]       | CATL_HUMAN | 37546 | 100% | 2  | 2  | 4  | 5.11%  |
| TPC1-p15 | (P07711) Cathepsin L precursor (EC 3.4.22.15)<br>(Major excreted protein) (MEP) [Contains: Cathepsin L heavy chain; Cathepsin L light chain]       | CATL_HUMAN | 37546 | 100% | 4  | 5  | 10 | 18.90% |
| TPC1-p15 | (P07711) Cathepsin L precursor (EC 3.4.22.15)<br>(Major excreted protein) (MEP) [Contains: Cathepsin L heavy chain; Cathepsin L light chain]       | CATL_HUMAN | 37546 | 100% | 2  | 2  | 2  | 14.40% |
| TPC1-p15 | (P07711) Cathepsin L precursor (EC 3.4.22.15)<br>(Major excreted protein) (MEP) [Contains: Cathepsin L heavy chain; Cathepsin L light chain]       | CATL_HUMAN | 37546 | 100% | 2  | 2  | 4  | 12.60% |
| TPC1-p15 | (P07858) Cathepsin B precursor (EC 3.4.22.1)<br>(Cathepsin B1) (APP secretase) (APPS) [Contains: Cathepsin B light chain; Cathepsin B heavy chain] | CATB_HUMAN | 37803 | 100% | 8  | 12 | 37 | 34.20% |
| TPC1-p15 | (P07858) Cathepsin B precursor (EC 3.4.22.1)<br>(Cathepsin B1) (APP secretase) (APPS) [Contains: Cathepsin B light chain; Cathepsin B heavy chain] | CATB_HUMAN | 37803 | 100% | 8  | 12 | 32 | 36.00% |
| TPC1-p15 | (P07858) Cathepsin B precursor (EC 3.4.22.1)<br>(Cathepsin B1) (APP secretase) (APPS) [Contains: Cathepsin B light chain; Cathepsin B heavy chain] | CATB_HUMAN | 37803 | 100% | 10 | 11 | 28 | 38.90% |

## Protein Identified Sequence Coverage in TPC-1

|          |                                                                                                                                                 |             |        |      |   |   |     |        |
|----------|-------------------------------------------------------------------------------------------------------------------------------------------------|-------------|--------|------|---|---|-----|--------|
| TPC1-p15 | (P07858) Cathepsin B precursor (EC 3.4.22.1) (Cathepsin B1) (APP secretase) (APPS) [Contains: Cathepsin B light chain; Cathepsin B heavy chain] | CATB_HUMAN  | 37803  | 100% | 8 | 9 | 28  | 36.00% |
| TPC1-p15 | (P07858) Cathepsin B precursor (EC 3.4.22.1) (Cathepsin B1) (APP secretase) (APPS) [Contains: Cathepsin B light chain; Cathepsin B heavy chain] | CATB_HUMAN  | 37803  | 100% | 3 | 3 | 19  | 17.70% |
| TPC1-p15 | (P07858) Cathepsin B precursor (EC 3.4.22.1) (Cathepsin B1) (APP secretase) (APPS) [Contains: Cathepsin B light chain; Cathepsin B heavy chain] | CATB_HUMAN  | 37803  | 100% | 2 | 2 | 3   | 17.70% |
| TPC1-p15 | (P07858) Cathepsin B precursor (EC 3.4.22.1) (Cathepsin B1) (APP secretase) (APPS) [Contains: Cathepsin B light chain; Cathepsin B heavy chain] | CATB_HUMAN  | 37803  | 100% | 4 | 6 | 99  | 16.80% |
| TPC1-p15 | (P07858) Cathepsin B precursor (EC 3.4.22.1) (Cathepsin B1) (APP secretase) (APPS) [Contains: Cathepsin B light chain; Cathepsin B heavy chain] | CATB_HUMAN  | 37803  | 100% | 3 | 5 | 120 | 13.60% |
| TPC1-p15 | (P07858) Cathepsin B precursor (EC 3.4.22.1) (Cathepsin B1) (APP secretase) (APPS) [Contains: Cathepsin B light chain; Cathepsin B heavy chain] | CATB_HUMAN  | 37803  | 100% | 2 | 3 | 37  | 10.30% |
| TPC1-p15 | (P07858) Cathepsin B precursor (EC 3.4.22.1) (Cathepsin B1) (APP secretase) (APPS) [Contains: Cathepsin B light chain; Cathepsin B heavy chain] | CATB_HUMAN  | 37803  | 100% | 3 | 4 | 12  | 15.00% |
| TPC1-p15 | (P07858) Cathepsin B precursor (EC 3.4.22.1) (Cathepsin B1) (APP secretase) (APPS) [Contains: Cathepsin B light chain; Cathepsin B heavy chain] | CATB_HUMAN  | 37803  | 100% | 2 | 2 | 3   | 11.80% |
| TPC1-p15 | (P07942) Laminin beta-1 chain precursor (Laminin B1 chain)                                                                                      | LAMB1_HUMAN | 198045 | 100% | 4 | 4 | 5   | 5.21%  |
| TPC1-p15 | (P07942) Laminin beta-1 chain precursor (Laminin B1 chain)                                                                                      | LAMB1_HUMAN | 198045 | 100% | 2 | 2 | 3   | 2.13%  |
| TPC1-p15 | (P07942) Laminin beta-1 chain precursor (Laminin B1 chain)                                                                                      | LAMB1_HUMAN | 198045 | 100% | 4 | 4 | 4   | 5.21%  |
| TPC1-p15 | (P07942) Laminin beta-1 chain precursor (Laminin B1 chain)                                                                                      | LAMB1_HUMAN | 198045 | 100% | 6 | 6 | 9   | 7.67%  |
| TPC1-p15 | (P07942) Laminin beta-1 chain precursor (Laminin B1 chain)                                                                                      | LAMB1_HUMAN | 198045 | 100% | 3 | 3 | 4   | 2.30%  |
| TPC1-p15 | (P07942) Laminin beta-1 chain precursor (Laminin B1 chain)                                                                                      | LAMB1_HUMAN | 198045 | 100% | 2 | 2 | 4   | 2.24%  |
| TPC1-p15 | (P07942) Laminin beta-1 chain precursor (Laminin B1 chain)                                                                                      | LAMB1_HUMAN | 198045 | 100% | 5 | 7 | 11  | 5.71%  |
| TPC1-p15 | (P07942) Laminin beta-1 chain precursor (Laminin B1 chain)                                                                                      | LAMB1_HUMAN | 198045 | 100% | 4 | 5 | 5   | 5.60%  |



## Protein Identified Sequence Coverage in TPC-1

|          |                                                                                                                                                                                            |             |        |      |   |   |   |       |
|----------|--------------------------------------------------------------------------------------------------------------------------------------------------------------------------------------------|-------------|--------|------|---|---|---|-------|
| TPC1-p15 | (P07942) Laminin beta-1 chain precursor (Laminin B1 chain)                                                                                                                                 | LAMB1_HUMAN | 198045 | 100% | 2 | 3 | 7 | 2.91% |
| TPC1-p15 | (P07996) Thrombospondin-1 precursor                                                                                                                                                        | TSP1_HUMAN  | 129394 | 100% | 2 | 2 | 3 | 2.22% |
| TPC1-p15 | (P07996) Thrombospondin-1 precursor                                                                                                                                                        | TSP1_HUMAN  | 129394 | 100% | 2 | 2 | 5 | 2.22% |
| TPC1-p15 | (P07996) Thrombospondin-1 precursor                                                                                                                                                        | TSP1_HUMAN  | 129394 | 100% | 2 | 2 | 2 | 2.22% |
| TPC1-p15 | (P07996) Thrombospondin-1 precursor                                                                                                                                                        | TSP1_HUMAN  | 129394 | 100% | 2 | 2 | 6 | 2.22% |
| TPC1-p15 | (P07996) Thrombospondin-1 precursor                                                                                                                                                        | TSP1_HUMAN  | 129394 | 100% | 2 | 2 | 2 | 2.91% |
| TPC1-p15 | (P08195) 4F2 cell-surface antigen heavy chain (4F2hc) (Lymphocyte activation antigen 4F2 large subunit) (4F2 heavy chain antigen) (CD98 antigen)                                           | 4F2_HUMAN   | 57929  | 100% | 2 | 2 | 3 | 5.10% |
| TPC1-p15 | (P08195) 4F2 cell-surface antigen heavy chain (4F2hc) (Lymphocyte activation antigen 4F2 large subunit) (4F2 heavy chain antigen) (CD98 antigen)                                           | 4F2_HUMAN   | 57929  | 100% | 3 | 3 | 3 | 9.26% |
| TPC1-p15 | (P08195) 4F2 cell-surface antigen heavy chain (4F2hc) (Lymphocyte activation antigen 4F2 large subunit) (4F2 heavy chain antigen) (CD98 antigen)                                           | 4F2_HUMAN   | 57929  | 100% | 2 | 2 | 2 | 7.75% |
| TPC1-p15 | (P08236) Beta-glucuronidase precursor (EC 3.2.1.31) (Beta-G1)                                                                                                                              | BGLR_HUMAN  | 74699  | 100% | 2 | 2 | 4 | 7.07% |
| TPC1-p15 | (P08236) Beta-glucuronidase precursor (EC 3.2.1.31) (Beta-G1)                                                                                                                              | BGLR_HUMAN  | 74699  | 100% | 2 | 2 | 2 | 5.99% |
| TPC1-p15 | (P08236) Beta-glucuronidase precursor (EC 3.2.1.31) (Beta-G1)                                                                                                                              | BGLR_HUMAN  | 74699  | 100% | 3 | 3 | 4 | 8.29% |
| TPC1-p15 | (P08236) Beta-glucuronidase precursor (EC 3.2.1.31) (Beta-G1)                                                                                                                              | BGLR_HUMAN  | 74699  | 100% | 2 | 2 | 2 | 4.45% |
| TPC1-p15 | (P08572) Collagen alpha-2(IV) chain precursor                                                                                                                                              | CO4A2_HUMAN | 167522 | 100% | 2 | 2 | 2 | 2.34% |
| TPC1-p15 | (P08572) Collagen alpha-2(IV) chain precursor                                                                                                                                              | CO4A2_HUMAN | 167522 | 100% | 2 | 2 | 2 | 2.34% |
| TPC1-p15 | (P08572) Collagen alpha-2(IV) chain precursor                                                                                                                                              | CO4A2_HUMAN | 167522 | 100% | 2 | 2 | 2 | 2.80% |
| TPC1-p15 | (P08572) Collagen alpha-2(IV) chain precursor                                                                                                                                              | CO4A2_HUMAN | 167522 | 100% | 2 | 2 | 2 | 3.62% |
| TPC1-p15 | (P08572) Collagen alpha-2(IV) chain precursor                                                                                                                                              | CO4A2_HUMAN | 167522 | 100% | 4 | 4 | 9 | 6.02% |
| TPC1-p15 | (P08648) Integrin alpha-5 precursor (Fibronectin receptor alpha subunit) (Integrin alpha-F) (VLA-5) (CD49e antigen) [Contains: Integrin alpha-5 heavy chain; Integrin alpha-5 light chain] | ITA5_HUMAN  | 114521 | 100% | 3 | 3 | 6 | 4.77% |
| TPC1-p15 | (P08648) Integrin alpha-5 precursor (Fibronectin receptor alpha subunit) (Integrin alpha-F) (VLA-5) (CD49e antigen) [Contains: Integrin alpha-5 heavy chain; Integrin alpha-5 light chain] | ITA5_HUMAN  | 114521 | 100% | 2 | 2 | 3 | 3.53% |
| TPC1-p15 | (P08648) Integrin alpha-5 precursor (Fibronectin receptor alpha subunit) (Integrin alpha-F) (VLA-5) (CD49e antigen) [Contains: Integrin alpha-5 heavy chain; Integrin alpha-5 light chain] | ITA5_HUMAN  | 114521 | 100% | 2 | 2 | 3 | 2.67% |
| TPC1-p15 | (P08648) Integrin alpha-5 precursor (Fibronectin receptor alpha subunit) (Integrin alpha-F) (VLA-5) (CD49e antigen) [Contains: Integrin alpha-5 heavy chain; Integrin alpha-5 light chain] | ITA5_HUMAN  | 114521 | 100% | 2 | 2 | 3 | 4.29% |

## Protein Identified Sequence Coverage in TPC-1

|          |                                                                                                                                                                                                                               |             |        |      |   |   |    |        |
|----------|-------------------------------------------------------------------------------------------------------------------------------------------------------------------------------------------------------------------------------|-------------|--------|------|---|---|----|--------|
| TPC1-p15 | (P08648) Integrin alpha-5 precursor (Fibronectin receptor alpha subunit) (Integrin alpha-F) (VLA-5) (CD49e antigen) [Contains: Integrin alpha-5 heavy chain; Integrin alpha-5 light chain]                                    | ITA5_HUMAN  | 114521 | 100% | 3 | 3 | 3  | 6.58%  |
| TPC1-p15 | (P08758) Annexin A5 (Annexin V) (Lipocortin V) (Endonexin II) (Calphobindin I) (CBP-I) (Placental anticoagulant protein I) (PAP-I) (PP4) (Thromboplastin inhibitor) (Vascular anticoagulant-alpha) (VAC-alpha) (Anchorin CII) | ANXA5_HUMAN | 35789  | 100% | 8 | 8 | 15 | 38.20% |
| TPC1-p15 | (P08758) Annexin A5 (Annexin V) (Lipocortin V) (Endonexin II) (Calphobindin I) (CBP-I) (Placental anticoagulant protein I) (PAP-I) (PP4) (Thromboplastin inhibitor) (Vascular anticoagulant-alpha) (VAC-alpha) (Anchorin CII) | ANXA5_HUMAN | 35789  | 100% | 7 | 7 | 11 | 25.70% |
| TPC1-p15 | (P08758) Annexin A5 (Annexin V) (Lipocortin V) (Endonexin II) (Calphobindin I) (CBP-I) (Placental anticoagulant protein I) (PAP-I) (PP4) (Thromboplastin inhibitor) (Vascular anticoagulant-alpha) (VAC-alpha) (Anchorin CII) | ANXA5_HUMAN | 35789  | 100% | 5 | 5 | 5  | 18.80% |
| TPC1-p15 | (P08758) Annexin A5 (Annexin V) (Lipocortin V) (Endonexin II) (Calphobindin I) (CBP-I) (Placental anticoagulant protein I) (PAP-I) (PP4) (Thromboplastin inhibitor) (Vascular anticoagulant-alpha) (VAC-alpha) (Anchorin CII) | ANXA5_HUMAN | 35789  | 100% | 7 | 7 | 12 | 26.00% |
| TPC1-p15 | (P08758) Annexin A5 (Annexin V) (Lipocortin V) (Endonexin II) (Calphobindin I) (CBP-I) (Placental anticoagulant protein I) (PAP-I) (PP4) (Thromboplastin inhibitor) (Vascular anticoagulant-alpha) (VAC-alpha) (Anchorin CII) | ANXA5_HUMAN | 35789  | 100% | 2 | 2 | 5  | 11.00% |
| TPC1-p15 | (P08758) Annexin A5 (Annexin V) (Lipocortin V) (Endonexin II) (Calphobindin I) (CBP-I) (Placental anticoagulant protein I) (PAP-I) (PP4) (Thromboplastin inhibitor) (Vascular anticoagulant-alpha) (VAC-alpha) (Anchorin CII) | ANXA5_HUMAN | 35789  | 100% | 5 | 6 | 14 | 23.20% |
| TPC1-p15 | (P08758) Annexin A5 (Annexin V) (Lipocortin V) (Endonexin II) (Calphobindin I) (CBP-I) (Placental anticoagulant protein I) (PAP-I) (PP4) (Thromboplastin inhibitor) (Vascular anticoagulant-alpha) (VAC-alpha) (Anchorin CII) | ANXA5_HUMAN | 35789  | 100% | 6 | 9 | 15 | 30.10% |
| TPC1-p15 | (P08758) Annexin A5 (Annexin V) (Lipocortin V) (Endonexin II) (Calphobindin I) (CBP-I) (Placental anticoagulant protein I) (PAP-I) (PP4) (Thromboplastin inhibitor) (Vascular anticoagulant-alpha) (VAC-alpha) (Anchorin CII) | ANXA5_HUMAN | 35789  | 100% | 3 | 3 | 4  | 20.10% |
| TPC1-p15 | (P08865) 40S ribosomal protein SA (p40) (34/67 kDa laminin receptor) (Colon carcinoma laminin-binding protein) (NEM/1CHD4) (Multidrug resistance-associated protein MGr1-Ag)                                                  | RSSA_HUMAN  | 32705  | 100% | 5 | 5 | 8  | 32.30% |

## Protein Identified Sequence Coverage in TPC-1

|          |                                                                                                                                                                                                                                |            |       |      |   |   |   |        |
|----------|--------------------------------------------------------------------------------------------------------------------------------------------------------------------------------------------------------------------------------|------------|-------|------|---|---|---|--------|
| TPC1-p15 | (P08865) 40S ribosomal protein SA (p40) (34/67 kDa laminin receptor) (Colon carcinoma laminin-binding protein) (NEM/1CHD4) (Multidrug resistance-associated protein MGr1-Ag)                                                   | RSSA_HUMAN | 32705 | 100% | 2 | 2 | 2 | 10.20% |
| TPC1-p15 | (P08865) 40S ribosomal protein SA (p40) (34/67 kDa laminin receptor) (Colon carcinoma laminin-binding protein) (NEM/1CHD4) (Multidrug resistance-associated protein MGr1-Ag)                                                   | RSSA_HUMAN | 32705 | 100% | 3 | 3 | 3 | 22.80% |
| TPC1-p15 | (P08865) 40S ribosomal protein SA (p40) (34/67 kDa laminin receptor) (Colon carcinoma laminin-binding protein) (NEM/1CHD4) (Multidrug resistance-associated protein MGr1-Ag)                                                   | RSSA_HUMAN | 32705 | 100% | 4 | 4 | 8 | 23.10% |
| TPC1-p15 | (P08865) 40S ribosomal protein SA (p40) (34/67 kDa laminin receptor) (Colon carcinoma laminin-binding protein) (NEM/1CHD4) (Multidrug resistance-associated protein MGr1-Ag)                                                   | RSSA_HUMAN | 32705 | 100% | 2 | 2 | 2 | 10.20% |
| TPC1-p15 | (P08865) 40S ribosomal protein SA (p40) (34/67 kDa laminin receptor) (Colon carcinoma laminin-binding protein) (NEM/1CHD4) (Multidrug resistance-associated protein MGr1-Ag)                                                   | RSSA_HUMAN | 32705 | 100% | 2 | 3 | 8 | 17.00% |
| TPC1-p15 | (P08865) 40S ribosomal protein SA (p40) (34/67 kDa laminin receptor) (Colon carcinoma laminin-binding protein) (NEM/1CHD4) (Multidrug resistance-associated protein MGr1-Ag)                                                   | RSSA_HUMAN | 32705 | 100% | 2 | 2 | 2 | 17.00% |
| TPC1-p15 | (P08962) CD63 antigen (Melanoma-associated antigen ME491) (Lysosome-associated membrane glycoprotein 3) (LAMP-3) (Ocular melanoma-associated antigen) (OMA81H) (Granulophysin) (Tetraspanin-30) (Tspan-30)                     | CD63_HUMAN | 25487 | 100% | 2 | 2 | 2 | 15.20% |
| TPC1-p15 | (P08962) CD63 antigen (Melanoma-associated antigen ME491) (Lysosome-associated membrane glycoprotein 3) (LAMP-3) (Ocular melanoma-associated antigen) (OMA81H) (Granulophysin) (Tetraspanin-30) (Tspan-30)                     | CD63_HUMAN | 25487 | 100% | 2 | 2 | 3 | 15.20% |
| TPC1-p15 | (P09382) Galectin-1 (Lectin galactoside-binding soluble 1) (Beta-galactoside-binding lectin L-14-I) (Lactose-binding lectin 1) (S-Lac lectin 1) (Galaptin) (14 kDa lectin) (HPL) (HBL) (Putative MAPK-activating protein MP12) | LEG1_HUMAN | 14567 | 100% | 4 | 4 | 7 | 46.30% |
| TPC1-p15 | (P09382) Galectin-1 (Lectin galactoside-binding soluble 1) (Beta-galactoside-binding lectin L-14-I) (Lactose-binding lectin 1) (S-Lac lectin 1) (Galaptin) (14 kDa lectin) (HPL) (HBL) (Putative MAPK-activating protein MP12) | LEG1_HUMAN | 14567 | 100% | 4 | 4 | 6 | 51.50% |
| TPC1-p15 | (P09382) Galectin-1 (Lectin galactoside-binding soluble 1) (Beta-galactoside-binding lectin L-14-I) (Lactose-binding lectin 1) (S-Lac lectin 1) (Galaptin) (14 kDa lectin) (HPL) (HBL) (Putative MAPK-activating protein MP12) | LEG1_HUMAN | 14567 | 100% | 3 | 3 | 3 | 42.50% |

## Protein Identified Sequence Coverage in TPC-1

|          |                                                                                                                                                                                                                                |             |        |      |    |    |    |        |
|----------|--------------------------------------------------------------------------------------------------------------------------------------------------------------------------------------------------------------------------------|-------------|--------|------|----|----|----|--------|
| TPC1-p15 | (P09382) Galectin-1 (Lectin galactoside-binding soluble 1) (Beta-galactoside-binding lectin L-14-I) (Lactose-binding lectin 1) (S-Lac lectin 1) (Galaptin) (14 kDa lectin) (HPL) (HBL) (Putative MAPK-activating protein MP12) | LEG1_HUMAN  | 14567  | 100% | 2  | 2  | 3  | 23.10% |
| TPC1-p15 | (P09382) Galectin-1 (Lectin galactoside-binding soluble 1) (Beta-galactoside-binding lectin L-14-I) (Lactose-binding lectin 1) (S-Lac lectin 1) (Galaptin) (14 kDa lectin) (HPL) (HBL) (Putative MAPK-activating protein MP12) | LEG1_HUMAN  | 14567  | 100% | 2  | 2  | 4  | 31.30% |
| TPC1-p15 | (P09429) High mobility group protein B1 (High mobility group protein 1) (HMG-1)                                                                                                                                                | HMGB1_HUMAN | 24746  | 100% | 5  | 7  | 13 | 28.00% |
| TPC1-p15 | (P09429) High mobility group protein B1 (High mobility group protein 1) (HMG-1)                                                                                                                                                | HMGB1_HUMAN | 24746  | 100% | 3  | 3  | 6  | 21.00% |
| TPC1-p15 | (P09429) High mobility group protein B1 (High mobility group protein 1) (HMG-1)                                                                                                                                                | HMGB1_HUMAN | 24746  | 100% | 2  | 2  | 2  | 15.40% |
| TPC1-p15 | (P09661) U2 small nuclear ribonucleoprotein A' (U2 snRNP-A')                                                                                                                                                                   | RU2A_HUMAN  | 28399  | 100% | 3  | 3  | 5  | 14.50% |
| TPC1-p15 | (P09661) U2 small nuclear ribonucleoprotein A' (U2 snRNP-A')                                                                                                                                                                   | RU2A_HUMAN  | 28399  | 100% | 4  | 5  | 7  | 18.00% |
| TPC1-p15 | (P09661) U2 small nuclear ribonucleoprotein A' (U2 snRNP-A')                                                                                                                                                                   | RU2A_HUMAN  | 28399  | 100% | 5  | 5  | 5  | 29.00% |
| TPC1-p15 | (P09661) U2 small nuclear ribonucleoprotein A' (U2 snRNP-A')                                                                                                                                                                   | RU2A_HUMAN  | 28399  | 100% | 5  | 5  | 8  | 24.70% |
| TPC1-p15 | (P09661) U2 small nuclear ribonucleoprotein A' (U2 snRNP-A')                                                                                                                                                                   | RU2A_HUMAN  | 28399  | 100% | 2  | 3  | 4  | 14.10% |
| TPC1-p15 | (P09661) U2 small nuclear ribonucleoprotein A' (U2 snRNP-A')                                                                                                                                                                   | RU2A_HUMAN  | 28399  | 100% | 4  | 5  | 9  | 33.30% |
| TPC1-p15 | (P10253) Lysosomal alpha-glucosidase precursor (EC 3.2.1.20) (Acid maltase) (Aglucosidase alfa) [Contains: 76 kDa lysosomal alpha-glucosidase; 70 kDa lysosomal alpha-glucosidase]                                             | LYAG_HUMAN  | 105321 | 100% | 15 | 18 | 36 | 23.90% |
| TPC1-p15 | (P10253) Lysosomal alpha-glucosidase precursor (EC 3.2.1.20) (Acid maltase) (Aglucosidase alfa) [Contains: 76 kDa lysosomal alpha-glucosidase; 70 kDa lysosomal alpha-glucosidase]                                             | LYAG_HUMAN  | 105321 | 100% | 12 | 14 | 28 | 19.90% |
| TPC1-p15 | (P10253) Lysosomal alpha-glucosidase precursor (EC 3.2.1.20) (Acid maltase) (Aglucosidase alfa) [Contains: 76 kDa lysosomal alpha-glucosidase; 70 kDa lysosomal alpha-glucosidase]                                             | LYAG_HUMAN  | 105321 | 100% | 9  | 11 | 17 | 17.40% |
| TPC1-p15 | (P10253) Lysosomal alpha-glucosidase precursor (EC 3.2.1.20) (Acid maltase) (Aglucosidase alfa) [Contains: 76 kDa lysosomal alpha-glucosidase; 70 kDa lysosomal alpha-glucosidase]                                             | LYAG_HUMAN  | 105321 | 100% | 12 | 12 | 26 | 17.60% |

Protein Identified Sequence Coverage in TPC-1

|          |                                                                                                                                                                                    |            |        |      |   |    |    |        |
|----------|------------------------------------------------------------------------------------------------------------------------------------------------------------------------------------|------------|--------|------|---|----|----|--------|
| TPC1-p15 | (P10253) Lysosomal alpha-glucosidase precursor (EC 3.2.1.20) (Acid maltase) (Aglucosidase alfa) [Contains: 76 kDa lysosomal alpha-glucosidase; 70 kDa lysosomal alpha-glucosidase] | LYAG_HUMAN | 105321 | 100% | 3 | 3  | 9  | 7.25%  |
| TPC1-p15 | (P10253) Lysosomal alpha-glucosidase precursor (EC 3.2.1.20) (Acid maltase) (Aglucosidase alfa) [Contains: 76 kDa lysosomal alpha-glucosidase; 70 kDa lysosomal alpha-glucosidase] | LYAG_HUMAN | 105321 | 100% | 6 | 7  | 12 | 8.51%  |
| TPC1-p15 | (P10253) Lysosomal alpha-glucosidase precursor (EC 3.2.1.20) (Acid maltase) (Aglucosidase alfa) [Contains: 76 kDa lysosomal alpha-glucosidase; 70 kDa lysosomal alpha-glucosidase] | LYAG_HUMAN | 105321 | 100% | 6 | 8  | 15 | 8.51%  |
| TPC1-p15 | (P10253) Lysosomal alpha-glucosidase precursor (EC 3.2.1.20) (Acid maltase) (Aglucosidase alfa) [Contains: 76 kDa lysosomal alpha-glucosidase; 70 kDa lysosomal alpha-glucosidase] | LYAG_HUMAN | 105321 | 100% | 4 | 6  | 10 | 4.52%  |
| TPC1-p15 | (P10253) Lysosomal alpha-glucosidase precursor (EC 3.2.1.20) (Acid maltase) (Aglucosidase alfa) [Contains: 76 kDa lysosomal alpha-glucosidase; 70 kDa lysosomal alpha-glucosidase] | LYAG_HUMAN | 105321 | 100% | 4 | 4  | 14 | 6.09%  |
| TPC1-p15 | (P10253) Lysosomal alpha-glucosidase precursor (EC 3.2.1.20) (Acid maltase) (Aglucosidase alfa) [Contains: 76 kDa lysosomal alpha-glucosidase; 70 kDa lysosomal alpha-glucosidase] | LYAG_HUMAN | 105321 | 100% | 6 | 7  | 10 | 12.20% |
| TPC1-p15 | (P10253) Lysosomal alpha-glucosidase precursor (EC 3.2.1.20) (Acid maltase) (Aglucosidase alfa) [Contains: 76 kDa lysosomal alpha-glucosidase; 70 kDa lysosomal alpha-glucosidase] | LYAG_HUMAN | 105321 | 100% | 5 | 5  | 23 | 8.19%  |
| TPC1-p15 | (P10253) Lysosomal alpha-glucosidase precursor (EC 3.2.1.20) (Acid maltase) (Aglucosidase alfa) [Contains: 76 kDa lysosomal alpha-glucosidase; 70 kDa lysosomal alpha-glucosidase] | LYAG_HUMAN | 105321 | 100% | 4 | 4  | 15 | 7.25%  |
| TPC1-p15 | (P10253) Lysosomal alpha-glucosidase precursor (EC 3.2.1.20) (Acid maltase) (Aglucosidase alfa) [Contains: 76 kDa lysosomal alpha-glucosidase; 70 kDa lysosomal alpha-glucosidase] | LYAG_HUMAN | 105321 | 100% | 6 | 10 | 39 | 13.00% |

## Protein Identified Sequence Coverage in TPC-1

|          |                                                                                                                                                                                                                                               |            |        |      |   |    |    |        |
|----------|-----------------------------------------------------------------------------------------------------------------------------------------------------------------------------------------------------------------------------------------------|------------|--------|------|---|----|----|--------|
| TPC1-p15 | (P10253) Lysosomal alpha-glucosidase precursor (EC 3.2.1.20) (Acid maltase) (Aglucosidase alfa) [Contains: 76 kDa lysosomal alpha-glucosidase; 70 kDa lysosomal alpha-glucosidase]                                                            | LYAG_HUMAN | 105321 | 100% | 5 | 7  | 31 | 11.90% |
| TPC1-p15 | (P10619) Lysosomal protective protein precursor (EC 3.4.16.5) (Cathepsin A) (Carboxypeptidase C) (Protective protein for beta-galactosidase) [Contains: Lysosomal protective protein 32 kDa chain; Lysosomal protective protein 20 kDa chain] | PPGB_HUMAN | 54450  | 100% | 8 | 10 | 17 | 21.30% |
| TPC1-p15 | (P10619) Lysosomal protective protein precursor (EC 3.4.16.5) (Cathepsin A) (Carboxypeptidase C) (Protective protein for beta-galactosidase) [Contains: Lysosomal protective protein 32 kDa chain; Lysosomal protective protein 20 kDa chain] | PPGB_HUMAN | 54450  | 100% | 8 | 8  | 17 | 21.30% |
| TPC1-p15 | (P10619) Lysosomal protective protein precursor (EC 3.4.16.5) (Cathepsin A) (Carboxypeptidase C) (Protective protein for beta-galactosidase) [Contains: Lysosomal protective protein 32 kDa chain; Lysosomal protective protein 20 kDa chain] | PPGB_HUMAN | 54450  | 100% | 8 | 8  | 9  | 21.30% |
| TPC1-p15 | (P10619) Lysosomal protective protein precursor (EC 3.4.16.5) (Cathepsin A) (Carboxypeptidase C) (Protective protein for beta-galactosidase) [Contains: Lysosomal protective protein 32 kDa chain; Lysosomal protective protein 20 kDa chain] | PPGB_HUMAN | 54450  | 100% | 7 | 7  | 16 | 21.00% |
| TPC1-p15 | (P10619) Lysosomal protective protein precursor (EC 3.4.16.5) (Cathepsin A) (Carboxypeptidase C) (Protective protein for beta-galactosidase) [Contains: Lysosomal protective protein 32 kDa chain; Lysosomal protective protein 20 kDa chain] | PPGB_HUMAN | 54450  | 100% | 4 | 4  | 12 | 13.30% |
| TPC1-p15 | (P10619) Lysosomal protective protein precursor (EC 3.4.16.5) (Cathepsin A) (Carboxypeptidase C) (Protective protein for beta-galactosidase) [Contains: Lysosomal protective protein 32 kDa chain; Lysosomal protective protein 20 kDa chain] | PPGB_HUMAN | 54450  | 100% | 4 | 5  | 14 | 12.10% |
| TPC1-p15 | (P10619) Lysosomal protective protein precursor (EC 3.4.16.5) (Cathepsin A) (Carboxypeptidase C) (Protective protein for beta-galactosidase) [Contains: Lysosomal protective protein 32 kDa chain; Lysosomal protective protein 20 kDa chain] | PPGB_HUMAN | 54450  | 100% | 4 | 6  | 18 | 14.60% |

## Protein Identified Sequence Coverage in TPC-1

|          |                                                                                                                                                                                                                                               |             |       |      |   |   |    |        |
|----------|-----------------------------------------------------------------------------------------------------------------------------------------------------------------------------------------------------------------------------------------------|-------------|-------|------|---|---|----|--------|
| TPC1-p15 | (P10619) Lysosomal protective protein precursor (EC 3.4.16.5) (Cathepsin A) (Carboxypeptidase C) (Protective protein for beta-galactosidase) [Contains: Lysosomal protective protein 32 kDa chain; Lysosomal protective protein 20 kDa chain] | PPGB_HUMAN  | 54450 | 100% | 2 | 2 | 4  | 7.29%  |
| TPC1-p15 | (P10619) Lysosomal protective protein precursor (EC 3.4.16.5) (Cathepsin A) (Carboxypeptidase C) (Protective protein for beta-galactosidase) [Contains: Lysosomal protective protein 32 kDa chain; Lysosomal protective protein 20 kDa chain] | PPGB_HUMAN  | 54450 | 100% | 2 | 2 | 14 | 8.96%  |
| TPC1-p15 | (P10619) Lysosomal protective protein precursor (EC 3.4.16.5) (Cathepsin A) (Carboxypeptidase C) (Protective protein for beta-galactosidase) [Contains: Lysosomal protective protein 32 kDa chain; Lysosomal protective protein 20 kDa chain] | PPGB_HUMAN  | 54450 | 100% | 3 | 4 | 4  | 6.88%  |
| TPC1-p15 | (P10619) Lysosomal protective protein precursor (EC 3.4.16.5) (Cathepsin A) (Carboxypeptidase C) (Protective protein for beta-galactosidase) [Contains: Lysosomal protective protein 32 kDa chain; Lysosomal protective protein 20 kDa chain] | PPGB_HUMAN  | 54450 | 100% | 5 | 6 | 12 | 14.60% |
| TPC1-p15 | (P10619) Lysosomal protective protein precursor (EC 3.4.16.5) (Cathepsin A) (Carboxypeptidase C) (Protective protein for beta-galactosidase) [Contains: Lysosomal protective protein 32 kDa chain; Lysosomal protective protein 20 kDa chain] | PPGB_HUMAN  | 54450 | 100% | 3 | 5 | 13 | 12.50% |
| TPC1-p15 | (P10619) Lysosomal protective protein precursor (EC 3.4.16.5) (Cathepsin A) (Carboxypeptidase C) (Protective protein for beta-galactosidase) [Contains: Lysosomal protective protein 32 kDa chain; Lysosomal protective protein 20 kDa chain] | PPGB_HUMAN  | 54450 | 100% | 2 | 3 | 5  | 10.00% |
| TPC1-p15 | (P11021) 78 kDa glucose-regulated protein precursor (GRP 78) (Immunoglobulin heavy chain-binding protein) (BiP) (Endoplasmic reticulum lumenal Ca(2+)-binding protein grp78)                                                                  | GRP78_HUMAN | 72317 | 100% | 6 | 7 | 12 | 13.10% |
| TPC1-p15 | (P11021) 78 kDa glucose-regulated protein precursor (GRP 78) (Immunoglobulin heavy chain-binding protein) (BiP) (Endoplasmic reticulum lumenal Ca(2+)-binding protein grp78)                                                                  | GRP78_HUMAN | 72317 | 100% | 9 | 9 | 17 | 19.40% |
| TPC1-p15 | (P11021) 78 kDa glucose-regulated protein precursor (GRP 78) (Immunoglobulin heavy chain-binding protein) (BiP) (Endoplasmic reticulum lumenal Ca(2+)-binding protein grp78)                                                                  | GRP78_HUMAN | 72317 | 100% | 8 | 8 | 8  | 19.00% |

## Protein Identified Sequence Coverage in TPC-1

|          |                                                                                                                                                                              |             |        |      |    |    |    |        |
|----------|------------------------------------------------------------------------------------------------------------------------------------------------------------------------------|-------------|--------|------|----|----|----|--------|
| TPC1-p15 | (P11021) 78 kDa glucose-regulated protein precursor (GRP 78) (Immunoglobulin heavy chain-binding protein) (BiP) (Endoplasmic reticulum luminal Ca(2+)-binding protein grp78) | GRP78_HUMAN | 72317  | 100% | 12 | 13 | 22 | 26.50% |
| TPC1-p15 | (P11021) 78 kDa glucose-regulated protein precursor (GRP 78) (Immunoglobulin heavy chain-binding protein) (BiP) (Endoplasmic reticulum luminal Ca(2+)-binding protein grp78) | GRP78_HUMAN | 72317  | 100% | 2  | 2  | 3  | 5.96%  |
| TPC1-p15 | (P11021) 78 kDa glucose-regulated protein precursor (GRP 78) (Immunoglobulin heavy chain-binding protein) (BiP) (Endoplasmic reticulum luminal Ca(2+)-binding protein grp78) | GRP78_HUMAN | 72317  | 100% | 8  | 8  | 11 | 19.00% |
| TPC1-p15 | (P11021) 78 kDa glucose-regulated protein precursor (GRP 78) (Immunoglobulin heavy chain-binding protein) (BiP) (Endoplasmic reticulum luminal Ca(2+)-binding protein grp78) | GRP78_HUMAN | 72317  | 100% | 2  | 2  | 3  | 5.20%  |
| TPC1-p15 | (P11047) Laminin gamma-1 chain precursor (Laminin B2 chain)                                                                                                                  | LAMC1_HUMAN | 177587 | 100% | 2  | 2  | 2  | 2.55%  |
| TPC1-p15 | (P11047) Laminin gamma-1 chain precursor (Laminin B2 chain)                                                                                                                  | LAMC1_HUMAN | 177587 | 100% | 2  | 2  | 2  | 1.93%  |
| TPC1-p15 | (P11047) Laminin gamma-1 chain precursor (Laminin B2 chain)                                                                                                                  | LAMC1_HUMAN | 177587 | 100% | 3  | 3  | 6  | 2.42%  |
| TPC1-p15 | (P11047) Laminin gamma-1 chain precursor (Laminin B2 chain)                                                                                                                  | LAMC1_HUMAN | 177587 | 100% | 4  | 4  | 6  | 3.11%  |
| TPC1-p15 | (P11047) Laminin gamma-1 chain precursor (Laminin B2 chain)                                                                                                                  | LAMC1_HUMAN | 177587 | 100% | 5  | 6  | 8  | 3.48%  |
| TPC1-p15 | (P11047) Laminin gamma-1 chain precursor (Laminin B2 chain)                                                                                                                  | LAMC1_HUMAN | 177587 | 100% | 4  | 4  | 4  | 5.03%  |
| TPC1-p15 | (P11047) Laminin gamma-1 chain precursor (Laminin B2 chain)                                                                                                                  | LAMC1_HUMAN | 177587 | 100% | 2  | 2  | 2  | 2.80%  |
| TPC1-p15 | (P11117) Lysosomal acid phosphatase precursor (EC 3.1.3.2) (LAP)                                                                                                             | PPAL_HUMAN  | 48299  | 100% | 2  | 2  | 4  | 5.91%  |
| TPC1-p15 | (P11117) Lysosomal acid phosphatase precursor (EC 3.1.3.2) (LAP)                                                                                                             | PPAL_HUMAN  | 48299  | 100% | 2  | 3  | 3  | 8.27%  |
| TPC1-p15 | (P11117) Lysosomal acid phosphatase precursor (EC 3.1.3.2) (LAP)                                                                                                             | PPAL_HUMAN  | 48299  | 100% | 3  | 3  | 5  | 10.90% |
| TPC1-p15 | (P11117) Lysosomal acid phosphatase precursor (EC 3.1.3.2) (LAP)                                                                                                             | PPAL_HUMAN  | 48299  | 100% | 3  | 6  | 9  | 10.90% |
| TPC1-p15 | (P11117) Lysosomal acid phosphatase precursor (EC 3.1.3.2) (LAP)                                                                                                             | PPAL_HUMAN  | 48299  | 100% | 3  | 3  | 5  | 10.90% |
| TPC1-p15 | (P11279) Lysosome-associated membrane glycoprotein 1 precursor (LAMP-1) (CD107a antigen)                                                                                     | LAMP1_HUMAN | 44756  | 100% | 2  | 2  | 2  | 7.21%  |
| TPC1-p15 | (P11279) Lysosome-associated membrane glycoprotein 1 precursor (LAMP-1) (CD107a antigen)                                                                                     | LAMP1_HUMAN | 44756  | 100% | 2  | 2  | 4  | 8.65%  |
| TPC1-p15 | (P11279) Lysosome-associated membrane glycoprotein 1 precursor (LAMP-1) (CD107a antigen)                                                                                     | LAMP1_HUMAN | 44756  | 100% | 2  | 2  | 4  | 8.65%  |



## Protein Identified Sequence Coverage in TPC-1

|          |                                                                                                                                                                                                                                                     |             |        |      |   |   |    |        |
|----------|-----------------------------------------------------------------------------------------------------------------------------------------------------------------------------------------------------------------------------------------------------|-------------|--------|------|---|---|----|--------|
| TPC1-p15 | (P11279) Lysosome-associated membrane glycoprotein 1 precursor (LAMP-1) (CD107a antigen)                                                                                                                                                            | LAMP1_HUMAN | 44756  | 100% | 6 | 7 | 16 | 27.40% |
| TPC1-p15 | (P11279) Lysosome-associated membrane glycoprotein 1 precursor (LAMP-1) (CD107a antigen)                                                                                                                                                            | LAMP1_HUMAN | 44756  | 100% | 8 | 8 | 17 | 30.00% |
| TPC1-p15 | (P11279) Lysosome-associated membrane glycoprotein 1 precursor (LAMP-1) (CD107a antigen)                                                                                                                                                            | LAMP1_HUMAN | 44756  | 100% | 5 | 5 | 9  | 21.20% |
| TPC1-p15 | (P11279) Lysosome-associated membrane glycoprotein 1 precursor (LAMP-1) (CD107a antigen)                                                                                                                                                            | LAMP1_HUMAN | 44756  | 100% | 3 | 3 | 9  | 17.10% |
| TPC1-p15 | (P11717) Cation-independent mannose-6-phosphate receptor precursor (CI Man-6-P receptor) (CI-MPR) (M6PR) (Insulin-like growth factor 2 receptor) (Insulin-like growth factor II receptor) (IGF-II receptor) (M6P/IGF2 receptor) (M6P/IGF2R) (300 kD | MPRI_HUMAN  | 274256 | 100% | 2 | 2 | 2  | 1.20%  |
| TPC1-p15 | (P11717) Cation-independent mannose-6-phosphate receptor precursor (CI Man-6-P receptor) (CI-MPR) (M6PR) (Insulin-like growth factor 2 receptor) (Insulin-like growth factor II receptor) (IGF-II receptor) (M6P/IGF2 receptor) (M6P/IGF2R) (300 kD | MPRI_HUMAN  | 274256 | 100% | 2 | 2 | 2  | 0.92%  |
| TPC1-p15 | (P11717) Cation-independent mannose-6-phosphate receptor precursor (CI Man-6-P receptor) (CI-MPR) (M6PR) (Insulin-like growth factor 2 receptor) (Insulin-like growth factor II receptor) (IGF-II receptor) (M6P/IGF2 receptor) (M6P/IGF2R) (300 kD | MPRI_HUMAN  | 274256 | 100% | 2 | 2 | 3  | 0.92%  |
| TPC1-p15 | (P11717) Cation-independent mannose-6-phosphate receptor precursor (CI Man-6-P receptor) (CI-MPR) (M6PR) (Insulin-like growth factor 2 receptor) (Insulin-like growth factor II receptor) (IGF-II receptor) (M6P/IGF2 receptor) (M6P/IGF2R) (300 kD | MPRI_HUMAN  | 274256 | 100% | 2 | 3 | 5  | 1.85%  |
| TPC1-p15 | (P11717) Cation-independent mannose-6-phosphate receptor precursor (CI Man-6-P receptor) (CI-MPR) (M6PR) (Insulin-like growth factor 2 receptor) (Insulin-like growth factor II receptor) (IGF-II receptor) (M6P/IGF2 receptor) (M6P/IGF2R) (300 kD | MPRI_HUMAN  | 274256 | 100% | 7 | 7 | 10 | 6.46%  |
| TPC1-p15 | (P11717) Cation-independent mannose-6-phosphate receptor precursor (CI Man-6-P receptor) (CI-MPR) (M6PR) (Insulin-like growth factor 2 receptor) (Insulin-like growth factor II receptor) (IGF-II receptor) (M6P/IGF2 receptor) (M6P/IGF2R) (300 kD | MPRI_HUMAN  | 274256 | 100% | 2 | 2 | 2  | 0.88%  |

## Protein Identified Sequence Coverage in TPC-1

|          |                                                                                                                                                                                                                                                      |                |        |      |   |   |    |        |
|----------|------------------------------------------------------------------------------------------------------------------------------------------------------------------------------------------------------------------------------------------------------|----------------|--------|------|---|---|----|--------|
| TPC1-p15 | (P11717) Cation-independent mannose-6-phosphate receptor precursor (CI Man-6-P receptor) (CI-MPR) (M6PR) (Insulin-like growth factor 2 receptor) (Insulin-like growth factor II receptor) (IGF-II receptor) (M6P/IGF2 receptor) (M6P/IGF2R) (300 kD) | MPRI_HUMAN     | 274256 | 100% | 3 | 4 | 5  | 3.01%  |
| TPC1-p15 | (P11717) Cation-independent mannose-6-phosphate receptor precursor (CI Man-6-P receptor) (CI-MPR) (M6PR) (Insulin-like growth factor 2 receptor) (Insulin-like growth factor II receptor) (IGF-II receptor) (M6P/IGF2 receptor) (M6P/IGF2R) (300 kD) | MPRI_HUMAN     | 274256 | 100% | 7 | 7 | 10 | 7.75%  |
| TPC1-p15 | (P12109) Collagen alpha-1(VI) chain precursor                                                                                                                                                                                                        | CO6A1_HUMAN    | 108531 | 100% | 3 | 4 | 5  | 6.03%  |
| TPC1-p15 | (P12109) Collagen alpha-1(VI) chain precursor                                                                                                                                                                                                        | CO6A1_HUMAN    | 108531 | 100% | 2 | 2 | 3  | 3.89%  |
| TPC1-p15 | (P12109) Collagen alpha-1(VI) chain precursor                                                                                                                                                                                                        | CO6A1_HUMAN    | 108531 | 100% | 3 | 3 | 3  | 5.35%  |
| TPC1-p15 | (P12109) Collagen alpha-1(VI) chain precursor                                                                                                                                                                                                        | CO6A1_HUMAN    | 108531 | 100% | 4 | 5 | 12 | 7.98%  |
| TPC1-p15 | (P12109) Collagen alpha-1(VI) chain precursor                                                                                                                                                                                                        | CO6A1_HUMAN    | 108531 | 100% | 3 | 3 | 3  | 5.16%  |
| TPC1-p15 | (P12109) Collagen alpha-1(VI) chain precursor                                                                                                                                                                                                        | CO6A1_HUMAN    | 108531 | 100% | 2 | 3 | 4  | 5.06%  |
| TPC1-p15 | (P12109) Collagen alpha-1(VI) chain precursor                                                                                                                                                                                                        | CO6A1_HUMAN    | 108531 | 100% | 3 | 3 | 3  | 7.49%  |
| TPC1-p15 | (P12110) Collagen alpha-2(VI) chain precursor                                                                                                                                                                                                        | CO6A2_HUMAN    | 108557 | 100% | 3 | 3 | 3  | 6.67%  |
| TPC1-p15 | (P12429) Annexin A3 (Annexin III) (Lipocortin III) (Placental anticoagulant protein III) (PAP-III) (35-alpha calcimedlin) (Inositol 1,2-cyclic phosphate 2-phosphohydrolase)                                                                         | ANXA3_HUMAN    | 36228  | 100% | 2 | 2 | 2  | 9.63%  |
| TPC1-p15 | (P12429) Annexin A3 (Annexin III) (Lipocortin III) (Placental anticoagulant protein III) (PAP-III) (35-alpha calcimedlin) (Inositol 1,2-cyclic phosphate 2-phosphohydrolase)                                                                         | ANXA3_HUMAN    | 36228  | 100% | 2 | 2 | 2  | 9.63%  |
| TPC1-p15 | (P13473) Lysosome-associated membrane glycoprotein 2 precursor (LAMP-2) (CD107b antigen)                                                                                                                                                             | LAMP2_HUMAN    | 44943  | 100% | 2 | 2 | 2  | 5.12%  |
| TPC1-p15 | (P13473) Lysosome-associated membrane glycoprotein 2 precursor (LAMP-2) (CD107b antigen)                                                                                                                                                             | LAMP2_HUMAN    | 44943  | 100% | 5 | 6 | 13 | 19.30% |
| TPC1-p15 | (P13473) Lysosome-associated membrane glycoprotein 2 precursor (LAMP-2) (CD107b antigen)                                                                                                                                                             | LAMP2_HUMAN    | 44943  | 100% | 2 | 3 | 8  | 6.59%  |
| TPC1-p15 | (P13473) Lysosome-associated membrane glycoprotein 2 precursor (LAMP-2) (CD107b antigen)                                                                                                                                                             | LAMP2_HUMAN    | 44943  | 100% | 3 | 3 | 9  | 12.70% |
| TPC1-p15 | (P13473) Lysosome-associated membrane glycoprotein 2 precursor (LAMP-2) (CD107b antigen)                                                                                                                                                             | LAMP2_HUMAN    | 44943  | 100% | 2 | 2 | 3  | 15.90% |
| TPC1-p15 | (P13591) Neural cell adhesion molecule 1, 140 kDa isoform precursor (N-CAM 140) (NCAM-140) (CD56 antigen)                                                                                                                                            | NCA11_HUMAN,NC | 93343  | 100% | 3 | 3 | 4  | 6.60%  |
| TPC1-p15 | (P13591) Neural cell adhesion molecule 1, 140 kDa isoform precursor (N-CAM 140) (NCAM-140) (CD56 antigen)                                                                                                                                            | NCA11_HUMAN,NC | 83753  | 100% | 3 | 3 | 4  | 5.91%  |

Protein Identified Sequence Coverage in TPC-1

|          |                                                                                                                                                                              |                |        |      |    |    |    |       |
|----------|------------------------------------------------------------------------------------------------------------------------------------------------------------------------------|----------------|--------|------|----|----|----|-------|
| TPC1-p15 | (P13591) Neural cell adhesion molecule 1, 140 kDa isoform precursor (N-CAM 140) (NCAM-140) (CD56 antigen)                                                                    | NCA11_HUMAN,NC | 83753  | 100% | 4  | 5  | 5  | 8.80% |
| TPC1-p15 | (P13591) Neural cell adhesion molecule 1, 140 kDa isoform precursor (N-CAM 140) (NCAM-140) (CD56 antigen)                                                                    | NCA11_HUMAN,NC | 83753  | 100% | 3  | 3  | 4  | 6.04% |
| TPC1-p15 | (P13591) Neural cell adhesion molecule 1, 140 kDa isoform precursor (N-CAM 140) (NCAM-140) (CD56 antigen)                                                                    | NCA11_HUMAN,NC | 83753  | 100% | 3  | 3  | 5  | 8.02% |
| TPC1-p15 | (P13591) Neural cell adhesion molecule 1, 140 kDa isoform precursor (N-CAM 140) (NCAM-140) (CD56 antigen)                                                                    | NCA11_HUMAN,NC | 93343  | 100% | 2  | 3  | 4  | 4.01% |
| TPC1-p15 | (P13591) Neural cell adhesion molecule 1, 140 kDa isoform precursor (N-CAM 140) (NCAM-140) (CD56 antigen)                                                                    | NCA11_HUMAN,NC | 83753  | 100% | 4  | 5  | 6  | 9.46% |
| TPC1-p15 | (P13591) Neural cell adhesion molecule 1, 140 kDa isoform precursor (N-CAM 140) (NCAM-140) (CD56 antigen)                                                                    | NCA11_HUMAN,NC | 83753  | 100% | 2  | 3  | 8  | 4.47% |
| TPC1-p15 | (P13611) Versican core protein precursor (Large fibroblast proteoglycan) (Chondroitin sulfate proteoglycan core protein 2) (PG-M) (Glial hyaluronate-binding protein) (GHAP) | CSPG2_HUMAN    | 372795 | 100% | 12 | 12 | 20 | 5.51% |
| TPC1-p15 | (P13611) Versican core protein precursor (Large fibroblast proteoglycan) (Chondroitin sulfate proteoglycan core protein 2) (PG-M) (Glial hyaluronate-binding protein) (GHAP) | CSPG2_HUMAN    | 372795 | 100% | 9  | 9  | 16 | 3.89% |
| TPC1-p15 | (P13611) Versican core protein precursor (Large fibroblast proteoglycan) (Chondroitin sulfate proteoglycan core protein 2) (PG-M) (Glial hyaluronate-binding protein) (GHAP) | CSPG2_HUMAN    | 372795 | 100% | 11 | 12 | 13 | 4.92% |
| TPC1-p15 | (P13611) Versican core protein precursor (Large fibroblast proteoglycan) (Chondroitin sulfate proteoglycan core protein 2) (PG-M) (Glial hyaluronate-binding protein) (GHAP) | CSPG2_HUMAN    | 372795 | 100% | 10 | 12 | 24 | 3.89% |
| TPC1-p15 | (P13611) Versican core protein precursor (Large fibroblast proteoglycan) (Chondroitin sulfate proteoglycan core protein 2) (PG-M) (Glial hyaluronate-binding protein) (GHAP) | CSPG2_HUMAN    | 372795 | 100% | 3  | 3  | 4  | 2.15% |
| TPC1-p15 | (P13611) Versican core protein precursor (Large fibroblast proteoglycan) (Chondroitin sulfate proteoglycan core protein 2) (PG-M) (Glial hyaluronate-binding protein) (GHAP) | CSPG2_HUMAN    | 372795 | 100% | 4  | 4  | 11 | 1.53% |
| TPC1-p15 | (P13611) Versican core protein precursor (Large fibroblast proteoglycan) (Chondroitin sulfate proteoglycan core protein 2) (PG-M) (Glial hyaluronate-binding protein) (GHAP) | CSPG2_HUMAN    | 372795 | 100% | 3  | 3  | 8  | 1.21% |

## Protein Identified Sequence Coverage in TPC-1

|          |                                                                                                                                                                                                                                                      |             |        |      |    |    |    |        |
|----------|------------------------------------------------------------------------------------------------------------------------------------------------------------------------------------------------------------------------------------------------------|-------------|--------|------|----|----|----|--------|
| TPC1-p15 | (P13611) Versican core protein precursor (Large fibroblast proteoglycan) (Chondroitin sulfate proteoglycan core protein 2) (PG-M) (Glial hyaluronate-binding protein) (GHAP)                                                                         | CSPG2_HUMAN | 372795 | 100% | 4  | 4  | 11 | 2.06%  |
| TPC1-p15 | (P13611) Versican core protein precursor (Large fibroblast proteoglycan) (Chondroitin sulfate proteoglycan core protein 2) (PG-M) (Glial hyaluronate-binding protein) (GHAP)                                                                         | CSPG2_HUMAN | 372795 | 100% | 3  | 3  | 5  | 1.33%  |
| TPC1-p15 | (P13611) Versican core protein precursor (Large fibroblast proteoglycan) (Chondroitin sulfate proteoglycan core protein 2) (PG-M) (Glial hyaluronate-binding protein) (GHAP)                                                                         | CSPG2_HUMAN | 372795 | 100% | 5  | 5  | 5  | 1.65%  |
| TPC1-p15 | (P13611) Versican core protein precursor (Large fibroblast proteoglycan) (Chondroitin sulfate proteoglycan core protein 2) (PG-M) (Glial hyaluronate-binding protein) (GHAP)                                                                         | CSPG2_HUMAN | 372795 | 100% | 4  | 4  | 7  | 2.18%  |
| TPC1-p15 | (P13611) Versican core protein precursor (Large fibroblast proteoglycan) (Chondroitin sulfate proteoglycan core protein 2) (PG-M) (Glial hyaluronate-binding protein) (GHAP)                                                                         | CSPG2_HUMAN | 372795 | 100% | 4  | 4  | 6  | 2.15%  |
| TPC1-p15 | (P13611) Versican core protein precursor (Large fibroblast proteoglycan) (Chondroitin sulfate proteoglycan core protein 2) (PG-M) (Glial hyaluronate-binding protein) (GHAP)                                                                         | CSPG2_HUMAN | 372795 | 100% | 3  | 4  | 7  | 1.94%  |
| TPC1-p15 | (P13645) Keratin, type I cytoskeletal 10 (Cytokeratin-10) (CK-10) (Keratin-10) (K10)                                                                                                                                                                 | K1C10_HUMAN | 59502  | 100% | 2  | 2  | 2  | 7.08%  |
| TPC1-p15 | (P13667) Protein disulfide-isomerase A4 precursor (EC 5.3.4.1) (Protein ERp-72) (ERp72)                                                                                                                                                              | PDIA4_HUMAN | 72916  | 100% | 11 | 11 | 20 | 23.40% |
| TPC1-p15 | (P13667) Protein disulfide-isomerase A4 precursor (EC 5.3.4.1) (Protein ERp-72) (ERp72)                                                                                                                                                              | PDIA4_HUMAN | 72916  | 100% | 13 | 13 | 24 | 28.10% |
| TPC1-p15 | (P13667) Protein disulfide-isomerase A4 precursor (EC 5.3.4.1) (Protein ERp-72) (ERp72)                                                                                                                                                              | PDIA4_HUMAN | 72916  | 100% | 14 | 14 | 15 | 26.50% |
| TPC1-p15 | (P13667) Protein disulfide-isomerase A4 precursor (EC 5.3.4.1) (Protein ERp-72) (ERp72)                                                                                                                                                              | PDIA4_HUMAN | 72916  | 100% | 11 | 11 | 21 | 20.80% |
| TPC1-p15 | (P13667) Protein disulfide-isomerase A4 precursor (EC 5.3.4.1) (Protein ERp-72) (ERp72)                                                                                                                                                              | PDIA4_HUMAN | 72916  | 100% | 4  | 4  | 6  | 12.10% |
| TPC1-p15 | (P13667) Protein disulfide-isomerase A4 precursor (EC 5.3.4.1) (Protein ERp-72) (ERp72)                                                                                                                                                              | PDIA4_HUMAN | 72916  | 100% | 5  | 5  | 6  | 8.06%  |
| TPC1-p15 | (P13987) CD59 glycoprotein precursor (Membrane attack complex inhibition factor) (MACIF) (MAC-inhibitory protein) (MAC-IP) (Protectin) (MEM43 antigen) (Membrane inhibitor of reactive lysis) (MIRL) (20 kDa homologous restriction factor) (HRF-20) | CD59_HUMAN  | 14159  | 100% | 2  | 4  | 12 | 18.80% |

## Protein Identified Sequence Coverage in TPC-1

|          |                                                                                                                                                                                                                                                     |             |       |      |    |    |    |        |
|----------|-----------------------------------------------------------------------------------------------------------------------------------------------------------------------------------------------------------------------------------------------------|-------------|-------|------|----|----|----|--------|
| TPC1-p15 | (P13987) CD59 glycoprotein precursor (Membrane attack complex inhibition factor) (MACIF) (MAC-inhibitory protein) (MAC-IP) (Protectin) (MEM43 antigen) (Membrane inhibitor of reactive lysis) (MIRL) (20 kDa homologous restriction factor) (HRF-20 | CD59_HUMAN  | 14159 | 100% | 4  | 4  | 14 | 25.00% |
| TPC1-p15 | (P13987) CD59 glycoprotein precursor (Membrane attack complex inhibition factor) (MACIF) (MAC-inhibitory protein) (MAC-IP) (Protectin) (MEM43 antigen) (Membrane inhibitor of reactive lysis) (MIRL) (20 kDa homologous restriction factor) (HRF-20 | CD59_HUMAN  | 14159 | 100% | 3  | 3  | 10 | 25.00% |
| TPC1-p15 | (P13987) CD59 glycoprotein precursor (Membrane attack complex inhibition factor) (MACIF) (MAC-inhibitory protein) (MAC-IP) (Protectin) (MEM43 antigen) (Membrane inhibitor of reactive lysis) (MIRL) (20 kDa homologous restriction factor) (HRF-20 | CD59_HUMAN  | 14159 | 100% | 3  | 3  | 11 | 18.80% |
| TPC1-p15 | (P13987) CD59 glycoprotein precursor (Membrane attack complex inhibition factor) (MACIF) (MAC-inhibitory protein) (MAC-IP) (Protectin) (MEM43 antigen) (Membrane inhibitor of reactive lysis) (MIRL) (20 kDa homologous restriction factor) (HRF-20 | CD59_HUMAN  | 14159 | 100% | 4  | 4  | 61 | 32.00% |
| TPC1-p15 | (P13987) CD59 glycoprotein precursor (Membrane attack complex inhibition factor) (MACIF) (MAC-inhibitory protein) (MAC-IP) (Protectin) (MEM43 antigen) (Membrane inhibitor of reactive lysis) (MIRL) (20 kDa homologous restriction factor) (HRF-20 | CD59_HUMAN  | 14159 | 100% | 3  | 3  | 61 | 31.20% |
| TPC1-p15 | (P13987) CD59 glycoprotein precursor (Membrane attack complex inhibition factor) (MACIF) (MAC-inhibitory protein) (MAC-IP) (Protectin) (MEM43 antigen) (Membrane inhibitor of reactive lysis) (MIRL) (20 kDa homologous restriction factor) (HRF-20 | CD59_HUMAN  | 14159 | 100% | 4  | 4  | 84 | 32.00% |
| TPC1-p15 | (P14314) Glucosidase 2 beta subunit precursor (Glucosidase II beta subunit) (Protein kinase C substrate, 60.1 kDa protein, heavy chain) (PKCSH) (80K-H protein)                                                                                     | GLU2B_HUMAN | 59279 | 100% | 13 | 15 | 28 | 40.20% |
| TPC1-p15 | (P14314) Glucosidase 2 beta subunit precursor (Glucosidase II beta subunit) (Protein kinase C substrate, 60.1 kDa protein, heavy chain) (PKCSH) (80K-H protein)                                                                                     | GLU2B_HUMAN | 59279 | 100% | 14 | 15 | 27 | 38.00% |
| TPC1-p15 | (P14314) Glucosidase 2 beta subunit precursor (Glucosidase II beta subunit) (Protein kinase C substrate, 60.1 kDa protein, heavy chain) (PKCSH) (80K-H protein)                                                                                     | GLU2B_HUMAN | 59279 | 100% | 11 | 13 | 19 | 26.40% |

## Protein Identified Sequence Coverage in TPC-1

|          |                                                                                                                                                                 |                |       |      |    |    |    |        |
|----------|-----------------------------------------------------------------------------------------------------------------------------------------------------------------|----------------|-------|------|----|----|----|--------|
| TPC1-p15 | (P14314) Glucosidase 2 beta subunit precursor (Glucosidase II beta subunit) (Protein kinase C substrate, 60.1 kDa protein, heavy chain) (PKCSH) (80K-H protein) | GLU2B_HUMAN    | 59279 | 100% | 11 | 11 | 28 | 22.20% |
| TPC1-p15 | (P14314) Glucosidase 2 beta subunit precursor (Glucosidase II beta subunit) (Protein kinase C substrate, 60.1 kDa protein, heavy chain) (PKCSH) (80K-H protein) | GLU2B_HUMAN    | 59279 | 100% | 4  | 4  | 7  | 18.20% |
| TPC1-p15 | (P14314) Glucosidase 2 beta subunit precursor (Glucosidase II beta subunit) (Protein kinase C substrate, 60.1 kDa protein, heavy chain) (PKCSH) (80K-H protein) | GLU2B_HUMAN    | 59279 | 100% | 11 | 14 | 20 | 37.40% |
| TPC1-p15 | (P14314) Glucosidase 2 beta subunit precursor (Glucosidase II beta subunit) (Protein kinase C substrate, 60.1 kDa protein, heavy chain) (PKCSH) (80K-H protein) | GLU2B_HUMAN    | 59279 | 100% | 3  | 4  | 9  | 12.10% |
| TPC1-p15 | (P14314) Glucosidase 2 beta subunit precursor (Glucosidase II beta subunit) (Protein kinase C substrate, 60.1 kDa protein, heavy chain) (PKCSH) (80K-H protein) | GLU2B_HUMAN    | 59279 | 100% | 5  | 6  | 6  | 16.70% |
| TPC1-p15 | (P14314) Glucosidase 2 beta subunit precursor (Glucosidase II beta subunit) (Protein kinase C substrate, 60.1 kDa protein, heavy chain) (PKCSH) (80K-H protein) | GLU2B_HUMAN    | 59279 | 100% | 2  | 2  | 18 | 6.45%  |
| TPC1-p15 | (P14314) Glucosidase 2 beta subunit precursor (Glucosidase II beta subunit) (Protein kinase C substrate, 60.1 kDa protein, heavy chain) (PKCSH) (80K-H protein) | GLU2B_HUMAN    | 59279 | 100% | 2  | 3  | 13 | 11.20% |
| TPC1-p15 | (P14384) Carboxypeptidase M precursor (EC 3.4.17.12)                                                                                                            | CBPM_HUMAN     | 50497 | 100% | 2  | 2  | 4  | 9.26%  |
| TPC1-p15 | (P14618) Pyruvate kinase isozymes M1/M2 (EC 2.7.1.40) (Pyruvate kinase muscle isozyme) (Cytosolic thyroid hormone-binding protein) (CTHBP) (THBP1)              | KPYM_HUMAN     | 57788 | 100% | 3  | 3  | 4  | 10.40% |
| TPC1-p15 | (P14678) Small nuclear ribonucleoprotein-associated proteins B and B' (snRNP-B) (Sm protein B/B') (Sm-B/Sm-B') (SmB/SmB')                                       | RSMB_HUMAN,RSN | 24596 | 100% | 2  | 2  | 2  | 9.58%  |
| TPC1-p15 | (P15289) Arylsulfatase A precursor (EC 3.1.6.8) (ASA) (Cerebrosidase-sulfatase) [Contains: Arylsulfatase A component B; Arylsulfatase A component C]            | ARSA_HUMAN     | 53571 | 100% | 5  | 7  | 13 | 16.60% |
| TPC1-p15 | (P15289) Arylsulfatase A precursor (EC 3.1.6.8) (ASA) (Cerebrosidase-sulfatase) [Contains: Arylsulfatase A component B; Arylsulfatase A component C]            | ARSA_HUMAN     | 53571 | 100% | 6  | 8  | 16 | 19.30% |
| TPC1-p15 | (P15289) Arylsulfatase A precursor (EC 3.1.6.8) (ASA) (Cerebrosidase-sulfatase) [Contains: Arylsulfatase A component B; Arylsulfatase A component C]            | ARSA_HUMAN     | 53571 | 100% | 4  | 5  | 7  | 12.00% |

## Protein Identified Sequence Coverage in TPC-1

|          |                                                                                                                                                                                                              |            |       |      |    |    |    |        |
|----------|--------------------------------------------------------------------------------------------------------------------------------------------------------------------------------------------------------------|------------|-------|------|----|----|----|--------|
| TPC1-p15 | (P15289) Arylsulfatase A precursor (EC 3.1.6.8) (ASA) (Cerebroside-sulfatase) [Contains: Arylsulfatase A component B; Arylsulfatase A component C]                                                           | ARSA_HUMAN | 53571 | 100% | 5  | 7  | 13 | 14.60% |
| TPC1-p15 | (P15289) Arylsulfatase A precursor (EC 3.1.6.8) (ASA) (Cerebroside-sulfatase) [Contains: Arylsulfatase A component B; Arylsulfatase A component C]                                                           | ARSA_HUMAN | 53571 | 100% | 2  | 2  | 3  | 12.20% |
| TPC1-p15 | (P15289) Arylsulfatase A precursor (EC 3.1.6.8) (ASA) (Cerebroside-sulfatase) [Contains: Arylsulfatase A component B; Arylsulfatase A component C]                                                           | ARSA_HUMAN | 53571 | 100% | 4  | 6  | 24 | 14.00% |
| TPC1-p15 | (P15289) Arylsulfatase A precursor (EC 3.1.6.8) (ASA) (Cerebroside-sulfatase) [Contains: Arylsulfatase A component B; Arylsulfatase A component C]                                                           | ARSA_HUMAN | 53571 | 100% | 4  | 6  | 28 | 13.80% |
| TPC1-p15 | (P15289) Arylsulfatase A precursor (EC 3.1.6.8) (ASA) (Cerebroside-sulfatase) [Contains: Arylsulfatase A component B; Arylsulfatase A component C]                                                           | ARSA_HUMAN | 53571 | 100% | 3  | 3  | 5  | 10.80% |
| TPC1-p15 | (P15531) Nucleoside diphosphate kinase A (EC 2.7.4.6) (NDK A) (NDP kinase A) (Tumor metastatic process-associated protein) (Metastasis inhibition factor nm23) (nm23-H1) (Granzyme A-activated DNase) (GAAD) | NDKA_HUMAN | 17131 | 100% | 2  | 2  | 2  | 34.90% |
| TPC1-p15 | (P15531) Nucleoside diphosphate kinase A (EC 2.7.4.6) (NDK A) (NDP kinase A) (Tumor metastatic process-associated protein) (Metastasis inhibition factor nm23) (nm23-H1) (Granzyme A-activated DNase) (GAAD) | NDKA_HUMAN | 17131 | 100% | 3  | 3  | 5  | 47.40% |
| TPC1-p15 | (P15586) N-acetylglucosamine-6-sulfatase precursor (EC 3.1.6.14) (G6S) (Glucosamine-6-sulfatase)                                                                                                             | GL6S_HUMAN | 62066 | 100% | 7  | 7  | 14 | 19.90% |
| TPC1-p15 | (P15586) N-acetylglucosamine-6-sulfatase precursor (EC 3.1.6.14) (G6S) (Glucosamine-6-sulfatase)                                                                                                             | GL6S_HUMAN | 62066 | 100% | 10 | 10 | 18 | 30.60% |
| TPC1-p15 | (P15586) N-acetylglucosamine-6-sulfatase precursor (EC 3.1.6.14) (G6S) (Glucosamine-6-sulfatase)                                                                                                             | GL6S_HUMAN | 62066 | 100% | 7  | 8  | 13 | 22.80% |
| TPC1-p15 | (P15586) N-acetylglucosamine-6-sulfatase precursor (EC 3.1.6.14) (G6S) (Glucosamine-6-sulfatase)                                                                                                             | GL6S_HUMAN | 62066 | 100% | 6  | 6  | 17 | 14.50% |
| TPC1-p15 | (P15586) N-acetylglucosamine-6-sulfatase precursor (EC 3.1.6.14) (G6S) (Glucosamine-6-sulfatase)                                                                                                             | GL6S_HUMAN | 62066 | 100% | 15 | 19 | 53 | 42.00% |
| TPC1-p15 | (P15586) N-acetylglucosamine-6-sulfatase precursor (EC 3.1.6.14) (G6S) (Glucosamine-6-sulfatase)                                                                                                             | GL6S_HUMAN | 62066 | 100% | 13 | 15 | 43 | 34.60% |

## Protein Identified Sequence Coverage in TPC-1

|          |                                                                                                                                                                                                                                                     |            |       |      |    |    |    |        |
|----------|-----------------------------------------------------------------------------------------------------------------------------------------------------------------------------------------------------------------------------------------------------|------------|-------|------|----|----|----|--------|
| TPC1-p15 | (P15586) N-acetylglucosamine-6-sulfatase precursor (EC 3.1.6.14) (G6S) (Glucosamine-6-sulfatase)                                                                                                                                                    | GL6S_HUMAN | 62066 | 100% | 10 | 11 | 38 | 19.00% |
| TPC1-p15 | (P15586) N-acetylglucosamine-6-sulfatase precursor (EC 3.1.6.14) (G6S) (Glucosamine-6-sulfatase)                                                                                                                                                    | GL6S_HUMAN | 62066 | 100% | 4  | 4  | 7  | 20.30% |
| TPC1-p15 | (P15586) N-acetylglucosamine-6-sulfatase precursor (EC 3.1.6.14) (G6S) (Glucosamine-6-sulfatase)                                                                                                                                                    | GL6S_HUMAN | 62066 | 100% | 4  | 4  | 8  | 9.24%  |
| TPC1-p15 | (P15586) N-acetylglucosamine-6-sulfatase precursor (EC 3.1.6.14) (G6S) (Glucosamine-6-sulfatase)                                                                                                                                                    | GL6S_HUMAN | 62066 | 100% | 3  | 4  | 16 | 14.30% |
| TPC1-p15 | (P15586) N-acetylglucosamine-6-sulfatase precursor (EC 3.1.6.14) (G6S) (Glucosamine-6-sulfatase)                                                                                                                                                    | GL6S_HUMAN | 62066 | 100% | 4  | 4  | 12 | 8.33%  |
| TPC1-p15 | (P15586) N-acetylglucosamine-6-sulfatase precursor (EC 3.1.6.14) (G6S) (Glucosamine-6-sulfatase)                                                                                                                                                    | GL6S_HUMAN | 62066 | 100% | 2  | 3  | 7  | 6.70%  |
| TPC1-p15 | (P15848) Arylsulfatase B precursor (EC 3.1.6.12) (ASB) (N-acetylgalactosamine-4-sulfatase) (G4S)                                                                                                                                                    | ARSB_HUMAN | 59671 | 100% | 2  | 3  | 3  | 5.44%  |
| TPC1-p15 | (P15848) Arylsulfatase B precursor (EC 3.1.6.12) (ASB) (N-acetylgalactosamine-4-sulfatase) (G4S)                                                                                                                                                    | ARSB_HUMAN | 59671 | 100% | 3  | 3  | 3  | 9.94%  |
| TPC1-p15 | (P15848) Arylsulfatase B precursor (EC 3.1.6.12) (ASB) (N-acetylgalactosamine-4-sulfatase) (G4S)                                                                                                                                                    | ARSB_HUMAN | 59671 | 100% | 3  | 3  | 3  | 10.10% |
| TPC1-p15 | (P15848) Arylsulfatase B precursor (EC 3.1.6.12) (ASB) (N-acetylgalactosamine-4-sulfatase) (G4S)                                                                                                                                                    | ARSB_HUMAN | 59671 | 100% | 2  | 3  | 3  | 5.07%  |
| TPC1-p15 | (P15848) Arylsulfatase B precursor (EC 3.1.6.12) (ASB) (N-acetylgalactosamine-4-sulfatase) (G4S)                                                                                                                                                    | ARSB_HUMAN | 59671 | 100% | 2  | 3  | 4  | 7.32%  |
| TPC1-p15 | (P15848) Arylsulfatase B precursor (EC 3.1.6.12) (ASB) (N-acetylgalactosamine-4-sulfatase) (G4S)                                                                                                                                                    | ARSB_HUMAN | 59671 | 100% | 2  | 3  | 3  | 6.57%  |
| TPC1-p15 | (P15880) 40S ribosomal protein S2 (S4) (LLRep3 protein)                                                                                                                                                                                             | RS2_HUMAN  | 31307 | 100% | 3  | 3  | 4  | 14.70% |
| TPC1-p15 | (P15880) 40S ribosomal protein S2 (S4) (LLRep3 protein)                                                                                                                                                                                             | RS2_HUMAN  | 31307 | 100% | 2  | 2  | 3  | 9.22%  |
| TPC1-p15 | (P16070) CD44 antigen precursor (Phagocytic glycoprotein I) (PGP-1) (HUTCH-I) (Extracellular matrix receptor-III) (ECMR-III) (GP90 lymphocyte homing/adhesion receptor) (Hermes antigen) (Hyaluronate receptor) (Heparan sulfate proteoglycan) (Epi | CD44_HUMAN | 81535 | 100% | 6  | 7  | 22 | 9.43%  |
| TPC1-p15 | (P16070) CD44 antigen precursor (Phagocytic glycoprotein I) (PGP-1) (HUTCH-I) (Extracellular matrix receptor-III) (ECMR-III) (GP90 lymphocyte homing/adhesion receptor) (Hermes antigen) (Hyaluronate receptor) (Heparan sulfate proteoglycan) (Epi | CD44_HUMAN | 81535 | 100% | 5  | 6  | 23 | 7.82%  |



## Protein Identified Sequence Coverage in TPC-1

|          |                                                                                                                                                                                                                                                     |            |       |      |   |    |    |        |
|----------|-----------------------------------------------------------------------------------------------------------------------------------------------------------------------------------------------------------------------------------------------------|------------|-------|------|---|----|----|--------|
| TPC1-p15 | (P16070) CD44 antigen precursor (Phagocytic glycoprotein I) (PGP-1) (HUTCH-I) (Extracellular matrix receptor-III) (ECMR-III) (GP90 lymphocyte homing/adhesion receptor) (Hermes antigen) (Hyaluronate receptor) (Heparan sulfate proteoglycan) (Epi | CD44_HUMAN | 81535 | 100% | 7 | 8  | 21 | 9.57%  |
| TPC1-p15 | (P16070) CD44 antigen precursor (Phagocytic glycoprotein I) (PGP-1) (HUTCH-I) (Extracellular matrix receptor-III) (ECMR-III) (GP90 lymphocyte homing/adhesion receptor) (Hermes antigen) (Hyaluronate receptor) (Heparan sulfate proteoglycan) (Epi | CD44_HUMAN | 81535 | 100% | 7 | 7  | 32 | 9.57%  |
| TPC1-p15 | (P16070) CD44 antigen precursor (Phagocytic glycoprotein I) (PGP-1) (HUTCH-I) (Extracellular matrix receptor-III) (ECMR-III) (GP90 lymphocyte homing/adhesion receptor) (Hermes antigen) (Hyaluronate receptor) (Heparan sulfate proteoglycan) (Epi | CD44_HUMAN | 81535 | 100% | 6 | 7  | 25 | 9.70%  |
| TPC1-p15 | (P16070) CD44 antigen precursor (Phagocytic glycoprotein I) (PGP-1) (HUTCH-I) (Extracellular matrix receptor-III) (ECMR-III) (GP90 lymphocyte homing/adhesion receptor) (Hermes antigen) (Hyaluronate receptor) (Heparan sulfate proteoglycan) (Epi | CD44_HUMAN | 81535 | 100% | 9 | 12 | 21 | 12.00% |
| TPC1-p15 | (P16070) CD44 antigen precursor (Phagocytic glycoprotein I) (PGP-1) (HUTCH-I) (Extracellular matrix receptor-III) (ECMR-III) (GP90 lymphocyte homing/adhesion receptor) (Hermes antigen) (Hyaluronate receptor) (Heparan sulfate proteoglycan) (Epi | CD44_HUMAN | 81535 | 100% | 9 | 9  | 26 | 12.00% |
| TPC1-p15 | (P16070) CD44 antigen precursor (Phagocytic glycoprotein I) (PGP-1) (HUTCH-I) (Extracellular matrix receptor-III) (ECMR-III) (GP90 lymphocyte homing/adhesion receptor) (Hermes antigen) (Hyaluronate receptor) (Heparan sulfate proteoglycan) (Epi | CD44_HUMAN | 81535 | 100% | 4 | 4  | 6  | 6.33%  |
| TPC1-p15 | (P16070) CD44 antigen precursor (Phagocytic glycoprotein I) (PGP-1) (HUTCH-I) (Extracellular matrix receptor-III) (ECMR-III) (GP90 lymphocyte homing/adhesion receptor) (Hermes antigen) (Hyaluronate receptor) (Heparan sulfate proteoglycan) (Epi | CD44_HUMAN | 81535 | 100% | 2 | 3  | 5  | 2.83%  |
| TPC1-p15 | (P16278) Beta-galactosidase precursor (EC 3.2.1.23) (Lactase) (Acid beta-galactosidase)                                                                                                                                                             | BGAL_HUMAN | 76076 | 100% | 7 | 7  | 11 | 13.10% |
| TPC1-p15 | (P16278) Beta-galactosidase precursor (EC 3.2.1.23) (Lactase) (Acid beta-galactosidase)                                                                                                                                                             | BGAL_HUMAN | 76076 | 100% | 5 | 5  | 8  | 10.00% |
| TPC1-p15 | (P16278) Beta-galactosidase precursor (EC 3.2.1.23) (Lactase) (Acid beta-galactosidase)                                                                                                                                                             | BGAL_HUMAN | 76076 | 100% | 6 | 6  | 6  | 11.70% |

## Protein Identified Sequence Coverage in TPC-1

|          |                                                                                                                                        |             |        |      |   |   |    |        |
|----------|----------------------------------------------------------------------------------------------------------------------------------------|-------------|--------|------|---|---|----|--------|
| TPC1-p15 | (P16278) Beta-galactosidase precursor (EC 3.2.1.23) (Lactase) (Acid beta-galactosidase)                                                | BGAL_HUMAN  | 76076  | 100% | 7 | 7 | 14 | 13.60% |
| TPC1-p15 | (P16278) Beta-galactosidase precursor (EC 3.2.1.23) (Lactase) (Acid beta-galactosidase)                                                | BGAL_HUMAN  | 76076  | 100% | 5 | 5 | 11 | 10.00% |
| TPC1-p15 | (P16278) Beta-galactosidase precursor (EC 3.2.1.23) (Lactase) (Acid beta-galactosidase)                                                | BGAL_HUMAN  | 76076  | 100% | 2 | 2 | 3  | 4.14%  |
| TPC1-p15 | (P16278) Beta-galactosidase precursor (EC 3.2.1.23) (Lactase) (Acid beta-galactosidase)                                                | BGAL_HUMAN  | 76076  | 100% | 2 | 2 | 3  | 3.69%  |
| TPC1-p15 | (P16401) Histone H1.5 (Histone H1a)                                                                                                    | H15_HUMAN   | 22433  | 100% | 2 | 2 | 3  | 10.70% |
| TPC1-p15 | (P16401) Histone H1.5 (Histone H1a)                                                                                                    | H15_HUMAN   | 22433  | 100% | 2 | 2 | 2  | 10.20% |
| TPC1-p15 | (P16402) Histone H1.3 (Histone H1c)                                                                                                    | H13_HUMAN   | 22202  | 100% | 3 | 3 | 8  | 15.00% |
| TPC1-p15 | (P16402) Histone H1.3 (Histone H1c)                                                                                                    | H13_HUMAN   | 22202  | 100% | 3 | 3 | 9  | 15.00% |
| TPC1-p15 | (P16402) Histone H1.3 (Histone H1c)                                                                                                    | H13_HUMAN   | 22202  | 100% | 3 | 3 | 5  | 11.40% |
| TPC1-p15 | (P16402) Histone H1.3 (Histone H1c)                                                                                                    | H13_HUMAN   | 22202  | 100% | 4 | 4 | 12 | 11.40% |
| TPC1-p15 | (P16402) Histone H1.3 (Histone H1c)                                                                                                    | H13_HUMAN   | 22202  | 100% | 3 | 3 | 6  | 14.50% |
| TPC1-p15 | (P16402) Histone H1.3 (Histone H1c)                                                                                                    | H13_HUMAN   | 22202  | 100% | 2 | 2 | 2  | 10.50% |
| TPC1-p15 | (P17050) Alpha-N-acetylgalactosaminidase precursor (EC 3.2.1.49) (Alpha-galactosidase B)                                               | NAGAB_HUMAN | 46548  | 100% | 5 | 5 | 10 | 15.60% |
| TPC1-p15 | (P17050) Alpha-N-acetylgalactosaminidase precursor (EC 3.2.1.49) (Alpha-galactosidase B)                                               | NAGAB_HUMAN | 46548  | 100% | 7 | 7 | 12 | 24.60% |
| TPC1-p15 | (P17050) Alpha-N-acetylgalactosaminidase precursor (EC 3.2.1.49) (Alpha-galactosidase B)                                               | NAGAB_HUMAN | 46548  | 100% | 5 | 5 | 5  | 17.30% |
| TPC1-p15 | (P17050) Alpha-N-acetylgalactosaminidase precursor (EC 3.2.1.49) (Alpha-galactosidase B)                                               | NAGAB_HUMAN | 46548  | 100% | 6 | 6 | 10 | 20.40% |
| TPC1-p15 | (P17050) Alpha-N-acetylgalactosaminidase precursor (EC 3.2.1.49) (Alpha-galactosidase B)                                               | NAGAB_HUMAN | 46548  | 100% | 2 | 2 | 4  | 9.00%  |
| TPC1-p15 | (P17050) Alpha-N-acetylgalactosaminidase precursor (EC 3.2.1.49) (Alpha-galactosidase B)                                               | NAGAB_HUMAN | 46548  | 100% | 3 | 4 | 6  | 11.40% |
| TPC1-p15 | (P17050) Alpha-N-acetylgalactosaminidase precursor (EC 3.2.1.49) (Alpha-galactosidase B)                                               | NAGAB_HUMAN | 46548  | 100% | 2 | 3 | 6  | 8.76%  |
| TPC1-p15 | (P17050) Alpha-N-acetylgalactosaminidase precursor (EC 3.2.1.49) (Alpha-galactosidase B)                                               | NAGAB_HUMAN | 46548  | 100% | 3 | 3 | 3  | 13.60% |
| TPC1-p15 | (P17050) Alpha-N-acetylgalactosaminidase precursor (EC 3.2.1.49) (Alpha-galactosidase B)                                               | NAGAB_HUMAN | 46548  | 100% | 4 | 4 | 7  | 14.40% |
| TPC1-p15 | (P17050) Alpha-N-acetylgalactosaminidase precursor (EC 3.2.1.49) (Alpha-galactosidase B)                                               | NAGAB_HUMAN | 46548  | 100% | 3 | 4 | 10 | 11.90% |
| TPC1-p15 | (P17050) Alpha-N-acetylgalactosaminidase precursor (EC 3.2.1.49) (Alpha-galactosidase B)                                               | NAGAB_HUMAN | 46548  | 100% | 3 | 4 | 19 | 12.40% |
| TPC1-p15 | (P17301) Integrin alpha-2 precursor (Platelet membrane glycoprotein Ia) (GPIa) (Collagen receptor) (VLA-2 alpha chain) (CD49b antigen) | ITA2_HUMAN  | 129280 | 100% | 2 | 2 | 2  | 3.30%  |
| TPC1-p15 | (P17301) Integrin alpha-2 precursor (Platelet membrane glycoprotein Ia) (GPIa) (Collagen receptor) (VLA-2 alpha chain) (CD49b antigen) | ITA2_HUMAN  | 129280 | 100% | 2 | 2 | 4  | 3.22%  |
| TPC1-p15 | (P17301) Integrin alpha-2 precursor (Platelet membrane glycoprotein Ia) (GPIa) (Collagen receptor) (VLA-2 alpha chain) (CD49b antigen) | ITA2_HUMAN  | 129280 | 100% | 4 | 4 | 6  | 8.89%  |

## Protein Identified Sequence Coverage in TPC-1

|          |                                                                                                                                                                                             |             |        |      |   |   |   |        |
|----------|---------------------------------------------------------------------------------------------------------------------------------------------------------------------------------------------|-------------|--------|------|---|---|---|--------|
| TPC1-p15 | (P17405) Sphingomyelin phosphodiesterase precursor (EC 3.1.4.12) (Acid sphingomyelinase) (aSMase)                                                                                           | ASM_HUMAN   | 69835  | 100% | 2 | 2 | 2 | 5.88%  |
| TPC1-p15 | (P17405) Sphingomyelin phosphodiesterase precursor (EC 3.1.4.12) (Acid sphingomyelinase) (aSMase)                                                                                           | ASM_HUMAN   | 69835  | 100% | 2 | 2 | 2 | 6.68%  |
| TPC1-p15 | (P17405) Sphingomyelin phosphodiesterase precursor (EC 3.1.4.12) (Acid sphingomyelinase) (aSMase)                                                                                           | ASM_HUMAN   | 69835  | 100% | 2 | 2 | 4 | 4.13%  |
| TPC1-p15 | (P17900) Ganglioside GM2 activator precursor (GM2-AP) (Cerebroside sulfate activator protein) (Shingolipid activator protein 3) (SAP-3) [Contains: Ganglioside GM2 activator isoform short] | SAP3_HUMAN  | 20805  | 100% | 3 | 4 | 6 | 33.70% |
| TPC1-p15 | (P17900) Ganglioside GM2 activator precursor (GM2-AP) (Cerebroside sulfate activator protein) (Shingolipid activator protein 3) (SAP-3) [Contains: Ganglioside GM2 activator isoform short] | SAP3_HUMAN  | 20805  | 100% | 3 | 4 | 8 | 21.20% |
| TPC1-p15 | (P17900) Ganglioside GM2 activator precursor (GM2-AP) (Cerebroside sulfate activator protein) (Shingolipid activator protein 3) (SAP-3) [Contains: Ganglioside GM2 activator isoform short] | SAP3_HUMAN  | 20805  | 100% | 3 | 3 | 3 | 33.70% |
| TPC1-p15 | (P17900) Ganglioside GM2 activator precursor (GM2-AP) (Cerebroside sulfate activator protein) (Shingolipid activator protein 3) (SAP-3) [Contains: Ganglioside GM2 activator isoform short] | SAP3_HUMAN  | 20805  | 100% | 3 | 3 | 5 | 21.20% |
| TPC1-p15 | (P18084) Integrin beta-5 precursor                                                                                                                                                          | ITB5_HUMAN  | 88037  | 100% | 2 | 2 | 3 | 5.13%  |
| TPC1-p15 | (P18084) Integrin beta-5 precursor                                                                                                                                                          | ITB5_HUMAN  | 88037  | 100% | 3 | 3 | 4 | 9.26%  |
| TPC1-p15 | (P18084) Integrin beta-5 precursor                                                                                                                                                          | ITB5_HUMAN  | 88037  | 100% | 6 | 6 | 6 | 13.50% |
| TPC1-p15 | (P18084) Integrin beta-5 precursor                                                                                                                                                          | ITB5_HUMAN  | 88037  | 100% | 3 | 3 | 5 | 7.01%  |
| TPC1-p15 | (P18084) Integrin beta-5 precursor                                                                                                                                                          | ITB5_HUMAN  | 88037  | 100% | 3 | 3 | 4 | 9.26%  |
| TPC1-p15 | (P18084) Integrin beta-5 precursor                                                                                                                                                          | ITB5_HUMAN  | 88037  | 100% | 2 | 2 | 3 | 4.01%  |
| TPC1-p15 | (P18084) Integrin beta-5 precursor                                                                                                                                                          | ITB5_HUMAN  | 88037  | 100% | 2 | 2 | 2 | 7.26%  |
| TPC1-p15 | (P18084) Integrin beta-5 precursor                                                                                                                                                          | ITB5_HUMAN  | 88037  | 100% | 3 | 3 | 7 | 5.76%  |
| TPC1-p15 | (P18084) Integrin beta-5 precursor                                                                                                                                                          | ITB5_HUMAN  | 88037  | 100% | 2 | 3 | 6 | 5.76%  |
| TPC1-p15 | (P18206) Vinculin (Metavinculin)                                                                                                                                                            | VINC_HUMAN  | 123652 | 100% | 2 | 2 | 2 | 3.00%  |
| TPC1-p15 | (P19022) Neural-cadherin precursor (N-cadherin) (Cadherin-2) (CDw325 antigen)                                                                                                               | CADH2_HUMAN | 99836  | 100% | 3 | 3 | 3 | 8.28%  |
| TPC1-p15 | (P19022) Neural-cadherin precursor (N-cadherin) (Cadherin-2) (CDw325 antigen)                                                                                                               | CADH2_HUMAN | 99836  | 100% | 2 | 2 | 3 | 6.51%  |
| TPC1-p15 | (P19338) Nucleolin (Protein C23)                                                                                                                                                            | NUCL_HUMAN  | 76467  | 100% | 2 | 2 | 2 | 6.06%  |
| TPC1-p15 | (P19338) Nucleolin (Protein C23)                                                                                                                                                            | NUCL_HUMAN  | 76467  | 100% | 2 | 4 | 4 | 6.06%  |

## Protein Identified Sequence Coverage in TPC-1

|          |                                                                                                                                                                                                                                                   |            |        |      |   |   |    |        |
|----------|---------------------------------------------------------------------------------------------------------------------------------------------------------------------------------------------------------------------------------------------------|------------|--------|------|---|---|----|--------|
| TPC1-p15 | (P20618) Proteasome subunit beta type 1 (EC 3.4.25.1) (Proteasome component C5) (Macropain subunit C5) (Multicatalytic endopeptidase complex subunit C5) (Proteasome gamma chain)                                                                 | PSB1_HUMAN | 26473  | 100% | 2 | 2 | 3  | 14.10% |
| TPC1-p15 | (P20618) Proteasome subunit beta type 1 (EC 3.4.25.1) (Proteasome component C5) (Macropain subunit C5) (Multicatalytic endopeptidase complex subunit C5) (Proteasome gamma chain)                                                                 | PSB1_HUMAN | 26473  | 100% | 2 | 2 | 2  | 14.10% |
| TPC1-p15 | (P20933) N(4)-(beta-N-acetylglucosaminy)-L-asparaginase precursor (EC 3.5.1.26) (Glycosylasparaginase) (Aspartylglucosaminidase) (N4-(N-acetyl-beta-glucosaminy)-L-asparagine amidase) (AGA) [Contains: Glycosylasparaginase alpha chain; Glycosy | ASPG_HUMAN | 37176  | 100% | 4 | 7 | 22 | 17.10% |
| TPC1-p15 | (P20933) N(4)-(beta-N-acetylglucosaminy)-L-asparaginase precursor (EC 3.5.1.26) (Glycosylasparaginase) (Aspartylglucosaminidase) (N4-(N-acetyl-beta-glucosaminy)-L-asparagine amidase) (AGA) [Contains: Glycosylasparaginase alpha chain; Glycosy | ASPG_HUMAN | 37176  | 100% | 5 | 7 | 23 | 28.90% |
| TPC1-p15 | (P20933) N(4)-(beta-N-acetylglucosaminy)-L-asparaginase precursor (EC 3.5.1.26) (Glycosylasparaginase) (Aspartylglucosaminidase) (N4-(N-acetyl-beta-glucosaminy)-L-asparagine amidase) (AGA) [Contains: Glycosylasparaginase alpha chain; Glycosy | ASPG_HUMAN | 37176  | 100% | 3 | 5 | 15 | 8.09%  |
| TPC1-p15 | (P20933) N(4)-(beta-N-acetylglucosaminy)-L-asparaginase precursor (EC 3.5.1.26) (Glycosylasparaginase) (Aspartylglucosaminidase) (N4-(N-acetyl-beta-glucosaminy)-L-asparagine amidase) (AGA) [Contains: Glycosylasparaginase alpha chain; Glycosy | ASPG_HUMAN | 37176  | 100% | 2 | 2 | 11 | 20.80% |
| TPC1-p15 | (P21333) Filamin-A (Alpha-filamin) (Filamin-1) (Endothelial actin-binding protein) (Actin-binding protein 280) (ABP-280) (Nonmuscle filamin)                                                                                                      | FLNA_HUMAN | 280602 | 100% | 2 | 2 | 2  | 1.17%  |
| TPC1-p15 | (P21333) Filamin-A (Alpha-filamin) (Filamin-1) (Endothelial actin-binding protein) (Actin-binding protein 280) (ABP-280) (Nonmuscle filamin)                                                                                                      | FLNA_HUMAN | 280602 | 100% | 2 | 2 | 2  | 1.28%  |
| TPC1-p15 | (P21333) Filamin-A (Alpha-filamin) (Filamin-1) (Endothelial actin-binding protein) (Actin-binding protein 280) (ABP-280) (Nonmuscle filamin)                                                                                                      | FLNA_HUMAN | 280602 | 100% | 2 | 2 | 2  | 0.91%  |

## Protein Identified Sequence Coverage in TPC-1

|          |                                                                                                                                                                              |             |        |      |   |   |    |        |
|----------|------------------------------------------------------------------------------------------------------------------------------------------------------------------------------|-------------|--------|------|---|---|----|--------|
| TPC1-p15 | (P21333) Filamin-A (Alpha-filamin) (Filamin-1) (Endothelial actin-binding protein) (Actin-binding protein 280) (ABP-280) (Nonmuscle filamin)                                 | FLNA_HUMAN  | 280602 | 100% | 2 | 2 | 4  | 2.34%  |
| TPC1-p15 | (P21333) Filamin-A (Alpha-filamin) (Filamin-1) (Endothelial actin-binding protein) (Actin-binding protein 280) (ABP-280) (Nonmuscle filamin)                                 | FLNA_HUMAN  | 280602 | 100% | 4 | 4 | 5  | 4.76%  |
| TPC1-p15 | (P21589) 5'-nucleotidase precursor (EC 3.1.3.5) (Ecto-5'-nucleotidase) (5'-NT) (CD73 antigen)                                                                                | 5NTD_HUMAN  | 63351  | 100% | 7 | 7 | 13 | 20.40% |
| TPC1-p15 | (P21589) 5'-nucleotidase precursor (EC 3.1.3.5) (Ecto-5'-nucleotidase) (5'-NT) (CD73 antigen)                                                                                | 5NTD_HUMAN  | 63351  | 100% | 7 | 7 | 10 | 24.60% |
| TPC1-p15 | (P21589) 5'-nucleotidase precursor (EC 3.1.3.5) (Ecto-5'-nucleotidase) (5'-NT) (CD73 antigen)                                                                                | 5NTD_HUMAN  | 63351  | 100% | 3 | 4 | 4  | 10.10% |
| TPC1-p15 | (P21589) 5'-nucleotidase precursor (EC 3.1.3.5) (Ecto-5'-nucleotidase) (5'-NT) (CD73 antigen)                                                                                | 5NTD_HUMAN  | 63351  | 100% | 3 | 4 | 7  | 8.89%  |
| TPC1-p15 | (P21589) 5'-nucleotidase precursor (EC 3.1.3.5) (Ecto-5'-nucleotidase) (5'-NT) (CD73 antigen)                                                                                | 5NTD_HUMAN  | 63351  | 100% | 2 | 2 | 3  | 8.89%  |
| TPC1-p15 | (P21589) 5'-nucleotidase precursor (EC 3.1.3.5) (Ecto-5'-nucleotidase) (5'-NT) (CD73 antigen)                                                                                | 5NTD_HUMAN  | 63351  | 100% | 6 | 8 | 10 | 18.30% |
| TPC1-p15 | (P21589) 5'-nucleotidase precursor (EC 3.1.3.5) (Ecto-5'-nucleotidase) (5'-NT) (CD73 antigen)                                                                                | 5NTD_HUMAN  | 63351  | 100% | 4 | 6 | 9  | 11.50% |
| TPC1-p15 | (P21589) 5'-nucleotidase precursor (EC 3.1.3.5) (Ecto-5'-nucleotidase) (5'-NT) (CD73 antigen)                                                                                | 5NTD_HUMAN  | 63351  | 100% | 2 | 3 | 5  | 6.45%  |
| TPC1-p15 | (P21589) 5'-nucleotidase precursor (EC 3.1.3.5) (Ecto-5'-nucleotidase) (5'-NT) (CD73 antigen)                                                                                | 5NTD_HUMAN  | 63351  | 100% | 2 | 2 | 3  | 10.50% |
| TPC1-p15 | (P21589) 5'-nucleotidase precursor (EC 3.1.3.5) (Ecto-5'-nucleotidase) (5'-NT) (CD73 antigen)                                                                                | 5NTD_HUMAN  | 63351  | 100% | 2 | 2 | 4  | 7.67%  |
| TPC1-p15 | (P21589) 5'-nucleotidase precursor (EC 3.1.3.5) (Ecto-5'-nucleotidase) (5'-NT) (CD73 antigen)                                                                                | 5NTD_HUMAN  | 63351  | 100% | 4 | 4 | 4  | 13.40% |
| TPC1-p15 | (P21589) 5'-nucleotidase precursor (EC 3.1.3.5) (Ecto-5'-nucleotidase) (5'-NT) (CD73 antigen)                                                                                | 5NTD_HUMAN  | 63351  | 100% | 5 | 7 | 11 | 18.60% |
| TPC1-p15 | (P21589) 5'-nucleotidase precursor (EC 3.1.3.5) (Ecto-5'-nucleotidase) (5'-NT) (CD73 antigen)                                                                                | 5NTD_HUMAN  | 63351  | 100% | 6 | 8 | 20 | 24.40% |
| TPC1-p15 | (P21589) 5'-nucleotidase precursor (EC 3.1.3.5) (Ecto-5'-nucleotidase) (5'-NT) (CD73 antigen)                                                                                | 5NTD_HUMAN  | 63351  | 100% | 2 | 2 | 7  | 7.84%  |
| TPC1-p15 | (P21796) Voltage-dependent anion-selective channel protein 1 (VDAC-1) (hVDAC1) (Outer mitochondrial membrane protein porin 1) (Plasmalemmal porin) (Porin 31HL) (Porin 31HM) | VDAC1_HUMAN | 30625  | 100% | 4 | 4 | 7  | 20.60% |
| TPC1-p15 | (P21796) Voltage-dependent anion-selective channel protein 1 (VDAC-1) (hVDAC1) (Outer mitochondrial membrane protein porin 1) (Plasmalemmal porin) (Porin 31HL) (Porin 31HM) | VDAC1_HUMAN | 30625  | 100% | 3 | 3 | 4  | 15.60% |
| TPC1-p15 | (P21796) Voltage-dependent anion-selective channel protein 1 (VDAC-1) (hVDAC1) (Outer mitochondrial membrane protein porin 1) (Plasmalemmal porin) (Porin 31HL) (Porin 31HM) | VDAC1_HUMAN | 30625  | 100% | 3 | 3 | 4  | 16.00% |

## Protein Identified Sequence Coverage in TPC-1

|          |                                                                                                                                                                                                                              |             |       |      |   |   |   |        |
|----------|------------------------------------------------------------------------------------------------------------------------------------------------------------------------------------------------------------------------------|-------------|-------|------|---|---|---|--------|
| TPC1-p15 | (P21796) Voltage-dependent anion-selective channel protein 1 (VDAC-1) (hVDAC1) (Outer mitochondrial membrane protein porin 1) (Plasmalemmal porin) (Porin 31HL) (Porin 31HM)                                                 | VDAC1_HUMAN | 30625 | 100% | 2 | 2 | 2 | 12.10% |
| TPC1-p15 | (P21796) Voltage-dependent anion-selective channel protein 1 (VDAC-1) (hVDAC1) (Outer mitochondrial membrane protein porin 1) (Plasmalemmal porin) (Porin 31HL) (Porin 31HM)                                                 | VDAC1_HUMAN | 30625 | 100% | 2 | 2 | 2 | 7.45%  |
| TPC1-p15 | (P21796) Voltage-dependent anion-selective channel protein 1 (VDAC-1) (hVDAC1) (Outer mitochondrial membrane protein porin 1) (Plasmalemmal porin) (Porin 31HL) (Porin 31HM)                                                 | VDAC1_HUMAN | 30625 | 100% | 3 | 3 | 3 | 22.70% |
| TPC1-p15 | (P21796) Voltage-dependent anion-selective channel protein 1 (VDAC-1) (hVDAC1) (Outer mitochondrial membrane protein porin 1) (Plasmalemmal porin) (Porin 31HL) (Porin 31HM)                                                 | VDAC1_HUMAN | 30625 | 100% | 2 | 2 | 2 | 14.50% |
| TPC1-p15 | (P22234) Multifunctional protein ADE2 [Includes: Phosphoribosylaminoimidazole-succinocarboxamide synthase (EC 6.3.2.6) (SAICAR synthetase); Phosphoribosylaminoimidazole carboxylase (EC 4.1.1.21) (AIR carboxylase) (AIRC)] | PUR6_HUMAN  | 46931 | 100% | 3 | 3 | 4 | 10.80% |
| TPC1-p15 | (P22234) Multifunctional protein ADE2 [Includes: Phosphoribosylaminoimidazole-succinocarboxamide synthase (EC 6.3.2.6) (SAICAR synthetase); Phosphoribosylaminoimidazole carboxylase (EC 4.1.1.21) (AIR carboxylase) (AIRC)] | PUR6_HUMAN  | 46931 | 100% | 3 | 3 | 6 | 9.67%  |
| TPC1-p15 | (P22234) Multifunctional protein ADE2 [Includes: Phosphoribosylaminoimidazole-succinocarboxamide synthase (EC 6.3.2.6) (SAICAR synthetase); Phosphoribosylaminoimidazole carboxylase (EC 4.1.1.21) (AIR carboxylase) (AIRC)] | PUR6_HUMAN  | 46931 | 100% | 2 | 2 | 2 | 6.84%  |
| TPC1-p15 | (P22234) Multifunctional protein ADE2 [Includes: Phosphoribosylaminoimidazole-succinocarboxamide synthase (EC 6.3.2.6) (SAICAR synthetase); Phosphoribosylaminoimidazole carboxylase (EC 4.1.1.21) (AIR carboxylase) (AIRC)] | PUR6_HUMAN  | 46931 | 100% | 2 | 2 | 3 | 6.84%  |
| TPC1-p15 | (P22234) Multifunctional protein ADE2 [Includes: Phosphoribosylaminoimidazole-succinocarboxamide synthase (EC 6.3.2.6) (SAICAR synthetase); Phosphoribosylaminoimidazole carboxylase (EC 4.1.1.21) (AIR carboxylase) (AIRC)] | PUR6_HUMAN  | 46931 | 100% | 3 | 3 | 6 | 9.20%  |

## Protein Identified Sequence Coverage in TPC-1

|          |                                                                                                                                                                                                                              |             |        |      |   |    |    |        |
|----------|------------------------------------------------------------------------------------------------------------------------------------------------------------------------------------------------------------------------------|-------------|--------|------|---|----|----|--------|
| TPC1-p15 | (P22234) Multifunctional protein ADE2 [Includes: Phosphoribosylaminoimidazole-succinocarboxamide synthase (EC 6.3.2.6) (SAICAR synthetase); Phosphoribosylaminoimidazole carboxylase (EC 4.1.1.21) (AIR carboxylase) (AIRC)] | PUR6_HUMAN  | 46931  | 100% | 2 | 2  | 3  | 9.20%  |
| TPC1-p15 | (P22234) Multifunctional protein ADE2 [Includes: Phosphoribosylaminoimidazole-succinocarboxamide synthase (EC 6.3.2.6) (SAICAR synthetase); Phosphoribosylaminoimidazole carboxylase (EC 4.1.1.21) (AIR carboxylase) (AIRC)] | PUR6_HUMAN  | 46931  | 100% | 2 | 3  | 3  | 9.91%  |
| TPC1-p15 | (P22304) Iduronate 2-sulfatase precursor (EC 3.1.6.13) (Alpha-L-iduronate sulfate sulfatase) (Idursulfase) [Contains: Iduronate 2-sulfatase 42 kDa chain; Iduronate 2-sulfatase 14 kDa chain]                                | IDS_HUMAN   | 61857  | 100% | 2 | 2  | 2  | 6.91%  |
| TPC1-p15 | (P22304) Iduronate 2-sulfatase precursor (EC 3.1.6.13) (Alpha-L-iduronate sulfate sulfatase) (Idursulfase) [Contains: Iduronate 2-sulfatase 42 kDa chain; Iduronate 2-sulfatase 14 kDa chain]                                | IDS_HUMAN   | 61857  | 100% | 2 | 2  | 3  | 6.73%  |
| TPC1-p15 | (P22307) Nonspecific lipid-transfer protein (EC 2.3.1.176) (Propanoyl-CoA C-acyltransferase) (NSL-TP) (Sterol carrier protein 2) (SCP-2) (Sterol carrier protein X) (SCP-X) (SCP-chi) (SCPX)                                 | NLTP_HUMAN  | 58977  | 100% | 2 | 2  | 2  | 4.20%  |
| TPC1-p15 | (P22392) Nucleoside diphosphate kinase B (EC 2.7.4.6) (NDK B) (NDP kinase B) (nm23-H2) (C-myc purine-binding transcription factor PUF)                                                                                       | NDKB_HUMAN  | 17280  | 100% | 7 | 10 | 20 | 53.90% |
| TPC1-p15 | (P22392) Nucleoside diphosphate kinase B (EC 2.7.4.6) (NDK B) (NDP kinase B) (nm23-H2) (C-myc purine-binding transcription factor PUF)                                                                                       | NDKB_HUMAN  | 17280  | 100% | 6 | 8  | 15 | 54.60% |
| TPC1-p15 | (P22392) Nucleoside diphosphate kinase B (EC 2.7.4.6) (NDK B) (NDP kinase B) (nm23-H2) (C-myc purine-binding transcription factor PUF)                                                                                       | NDKB_HUMAN  | 17280  | 100% | 4 | 7  | 10 | 41.40% |
| TPC1-p15 | (P22392) Nucleoside diphosphate kinase B (EC 2.7.4.6) (NDK B) (NDP kinase B) (nm23-H2) (C-myc purine-binding transcription factor PUF)                                                                                       | NDKB_HUMAN  | 17280  | 100% | 5 | 6  | 14 | 44.70% |
| TPC1-p15 | (P22392) Nucleoside diphosphate kinase B (EC 2.7.4.6) (NDK B) (NDP kinase B) (nm23-H2) (C-myc purine-binding transcription factor PUF)                                                                                       | NDKB_HUMAN  | 17280  | 100% | 2 | 3  | 8  | 22.40% |
| TPC1-p15 | (P23396) 40S ribosomal protein S3                                                                                                                                                                                            | RS3_HUMAN   | 26671  | 100% | 2 | 2  | 2  | 9.05%  |
| TPC1-p15 | (P23470) Receptor-type tyrosine-protein phosphatase gamma precursor (EC 3.1.3.48) (Protein-tyrosine phosphatase gamma) (R-PTP-gamma)                                                                                         | PTPRG_HUMAN | 162042 | 100% | 2 | 2  | 2  | 1.45%  |

## Protein Identified Sequence Coverage in TPC-1

|          |                                                                                                                                                                                                 |            |        |      |    |    |    |        |
|----------|-------------------------------------------------------------------------------------------------------------------------------------------------------------------------------------------------|------------|--------|------|----|----|----|--------|
| TPC1-p15 | (P24821) Tenascin precursor (TN) (Hexabrachion) (Cytotactin) (Neuronectin) (GMEM) (JI) (Miotendinous antigen) (Glioma-associated-extracellular matrix antigen) (GP 150-225) (Tenascin-C) (TN-C) | TENA_HUMAN | 240845 | 100% | 2  | 2  | 2  | 1.91%  |
| TPC1-p15 | (P24821) Tenascin precursor (TN) (Hexabrachion) (Cytotactin) (Neuronectin) (GMEM) (JI) (Miotendinous antigen) (Glioma-associated-extracellular matrix antigen) (GP 150-225) (Tenascin-C) (TN-C) | TENA_HUMAN | 240845 | 100% | 2  | 2  | 2  | 2.59%  |
| TPC1-p15 | (P25942) Tumor necrosis factor receptor superfamily member 5 precursor (CD40L receptor) (B-cell surface antigen CD40) (CDw40) (Bp50)                                                            | TNR5_HUMAN | 30600  | 100% | 2  | 2  | 3  | 9.39%  |
| TPC1-p15 | (P25942) Tumor necrosis factor receptor superfamily member 5 precursor (CD40L receptor) (B-cell surface antigen CD40) (CDw40) (Bp50)                                                            | TNR5_HUMAN | 30600  | 100% | 2  | 2  | 3  | 17.70% |
| TPC1-p15 | (P26006) Integrin alpha-3 precursor (Galactoprotein B3) (GAPB3) (VLA-3 alpha chain) (FRP-2) (CD49c antigen) [Contains: Integrin alpha-3 heavy chain; Integrin alpha-3 light chain]              | ITA3_HUMAN | 118682 | 100% | 9  | 11 | 16 | 12.00% |
| TPC1-p15 | (P26006) Integrin alpha-3 precursor (Galactoprotein B3) (GAPB3) (VLA-3 alpha chain) (FRP-2) (CD49c antigen) [Contains: Integrin alpha-3 heavy chain; Integrin alpha-3 light chain]              | ITA3_HUMAN | 118682 | 100% | 11 | 12 | 20 | 13.40% |
| TPC1-p15 | (P26006) Integrin alpha-3 precursor (Galactoprotein B3) (GAPB3) (VLA-3 alpha chain) (FRP-2) (CD49c antigen) [Contains: Integrin alpha-3 heavy chain; Integrin alpha-3 light chain]              | ITA3_HUMAN | 118682 | 100% | 10 | 10 | 12 | 11.90% |
| TPC1-p15 | (P26006) Integrin alpha-3 precursor (Galactoprotein B3) (GAPB3) (VLA-3 alpha chain) (FRP-2) (CD49c antigen) [Contains: Integrin alpha-3 heavy chain; Integrin alpha-3 light chain]              | ITA3_HUMAN | 118682 | 100% | 11 | 11 | 21 | 15.90% |
| TPC1-p15 | (P26006) Integrin alpha-3 precursor (Galactoprotein B3) (GAPB3) (VLA-3 alpha chain) (FRP-2) (CD49c antigen) [Contains: Integrin alpha-3 heavy chain; Integrin alpha-3 light chain]              | ITA3_HUMAN | 118682 | 100% | 2  | 2  | 4  | 3.47%  |
| TPC1-p15 | (P26006) Integrin alpha-3 precursor (Galactoprotein B3) (GAPB3) (VLA-3 alpha chain) (FRP-2) (CD49c antigen) [Contains: Integrin alpha-3 heavy chain; Integrin alpha-3 light chain]              | ITA3_HUMAN | 118682 | 100% | 10 | 12 | 22 | 16.60% |



## Protein Identified Sequence Coverage in TPC-1

|          |                                                                                                                                                                                    |            |        |      |    |    |    |        |
|----------|------------------------------------------------------------------------------------------------------------------------------------------------------------------------------------|------------|--------|------|----|----|----|--------|
| TPC1-p15 | (P26006) Integrin alpha-3 precursor (Galactoprotein B3) (GAPB3) (VLA-3 alpha chain) (FRP-2) (CD49c antigen) [Contains: Integrin alpha-3 heavy chain; Integrin alpha-3 light chain] | ITA3_HUMAN | 118682 | 100% | 7  | 9  | 17 | 12.90% |
| TPC1-p15 | (P26006) Integrin alpha-3 precursor (Galactoprotein B3) (GAPB3) (VLA-3 alpha chain) (FRP-2) (CD49c antigen) [Contains: Integrin alpha-3 heavy chain; Integrin alpha-3 light chain] | ITA3_HUMAN | 118682 | 100% | 10 | 10 | 21 | 12.90% |
| TPC1-p15 | (P26006) Integrin alpha-3 precursor (Galactoprotein B3) (GAPB3) (VLA-3 alpha chain) (FRP-2) (CD49c antigen) [Contains: Integrin alpha-3 heavy chain; Integrin alpha-3 light chain] | ITA3_HUMAN | 118682 | 100% | 3  | 3  | 6  | 6.00%  |
| TPC1-p15 | (P26006) Integrin alpha-3 precursor (Galactoprotein B3) (GAPB3) (VLA-3 alpha chain) (FRP-2) (CD49c antigen) [Contains: Integrin alpha-3 heavy chain; Integrin alpha-3 light chain] | ITA3_HUMAN | 118682 | 100% | 4  | 4  | 7  | 5.16%  |
| TPC1-p15 | (P26006) Integrin alpha-3 precursor (Galactoprotein B3) (GAPB3) (VLA-3 alpha chain) (FRP-2) (CD49c antigen) [Contains: Integrin alpha-3 heavy chain; Integrin alpha-3 light chain] | ITA3_HUMAN | 118682 | 100% | 2  | 2  | 6  | 2.35%  |
| TPC1-p15 | (P26006) Integrin alpha-3 precursor (Galactoprotein B3) (GAPB3) (VLA-3 alpha chain) (FRP-2) (CD49c antigen) [Contains: Integrin alpha-3 heavy chain; Integrin alpha-3 light chain] | ITA3_HUMAN | 118682 | 100% | 3  | 3  | 6  | 3.19%  |
| TPC1-p15 | (P26006) Integrin alpha-3 precursor (Galactoprotein B3) (GAPB3) (VLA-3 alpha chain) (FRP-2) (CD49c antigen) [Contains: Integrin alpha-3 heavy chain; Integrin alpha-3 light chain] | ITA3_HUMAN | 118682 | 100% | 2  | 3  | 3  | 3.85%  |
| TPC1-p15 | (P26006) Integrin alpha-3 precursor (Galactoprotein B3) (GAPB3) (VLA-3 alpha chain) (FRP-2) (CD49c antigen) [Contains: Integrin alpha-3 heavy chain; Integrin alpha-3 light chain] | ITA3_HUMAN | 118682 | 100% | 3  | 5  | 15 | 6.38%  |
| TPC1-p15 | (P26038) Moesin (Membrane-organizing extension spike protein)                                                                                                                      | MOES_HUMAN | 67673  | 100% | 2  | 2  | 3  | 4.51%  |
| TPC1-p15 | (P26038) Moesin (Membrane-organizing extension spike protein)                                                                                                                      | MOES_HUMAN | 67673  | 100% | 2  | 2  | 2  | 6.25%  |
| TPC1-p15 | (P26038) Moesin (Membrane-organizing extension spike protein)                                                                                                                      | MOES_HUMAN | 67673  | 100% | 3  | 4  | 5  | 9.03%  |
| TPC1-p15 | (P26038) Moesin (Membrane-organizing extension spike protein)                                                                                                                      | MOES_HUMAN | 67673  | 100% | 3  | 5  | 5  | 9.03%  |

## Protein Identified Sequence Coverage in TPC-1

|          |                                                                                                                                                                                                                                                    |             |       |      |    |    |    |        |
|----------|----------------------------------------------------------------------------------------------------------------------------------------------------------------------------------------------------------------------------------------------------|-------------|-------|------|----|----|----|--------|
| TPC1-p15 | (P26038) Moesin (Membrane-organizing extension spike protein)                                                                                                                                                                                      | MOES_HUMAN  | 67673 | 100% | 3  | 3  | 3  | 9.20%  |
| TPC1-p15 | (P26373) 60S ribosomal protein L13 (Breast basic conserved protein 1)                                                                                                                                                                              | RL13_HUMAN  | 24113 | 100% | 2  | 2  | 2  | 10.50% |
| TPC1-p15 | (P26373) 60S ribosomal protein L13 (Breast basic conserved protein 1)                                                                                                                                                                              | RL13_HUMAN  | 24113 | 100% | 2  | 2  | 5  | 11.00% |
| TPC1-p15 | (P26885) FK506-binding protein 2 precursor (EC 5.2.1.8) (Peptidyl-prolyl cis-trans isomerase) (PPIase) (Rotamase) (13 kDa FKBP) (FKBP-13)                                                                                                          | FKBP2_HUMAN | 15632 | 100% | 2  | 2  | 3  | 28.20% |
| TPC1-p15 | (P26885) FK506-binding protein 2 precursor (EC 5.2.1.8) (Peptidyl-prolyl cis-trans isomerase) (PPIase) (Rotamase) (13 kDa FKBP) (FKBP-13)                                                                                                          | FKBP2_HUMAN | 15632 | 100% | 2  | 2  | 2  | 30.30% |
| TPC1-p15 | (P27487) Dipeptidyl peptidase 4 (EC 3.4.14.5) (Dipeptidyl peptidase IV) (DPP IV) (T-cell activation antigen CD26) (TP103) (Adenosine deaminase complexing protein 2) (ADABP) [Contains: Dipeptidyl peptidase 4 membrane form (Dipeptidyl peptidase | DPP4_HUMAN  | 88263 | 100% | 10 | 11 | 20 | 18.00% |
| TPC1-p15 | (P27487) Dipeptidyl peptidase 4 (EC 3.4.14.5) (Dipeptidyl peptidase IV) (DPP IV) (T-cell activation antigen CD26) (TP103) (Adenosine deaminase complexing protein 2) (ADABP) [Contains: Dipeptidyl peptidase 4 membrane form (Dipeptidyl peptidase | DPP4_HUMAN  | 88263 | 100% | 12 | 12 | 23 | 20.90% |
| TPC1-p15 | (P27487) Dipeptidyl peptidase 4 (EC 3.4.14.5) (Dipeptidyl peptidase IV) (DPP IV) (T-cell activation antigen CD26) (TP103) (Adenosine deaminase complexing protein 2) (ADABP) [Contains: Dipeptidyl peptidase 4 membrane form (Dipeptidyl peptidase | DPP4_HUMAN  | 88263 | 100% | 13 | 14 | 14 | 22.20% |
| TPC1-p15 | (P27487) Dipeptidyl peptidase 4 (EC 3.4.14.5) (Dipeptidyl peptidase IV) (DPP IV) (T-cell activation antigen CD26) (TP103) (Adenosine deaminase complexing protein 2) (ADABP) [Contains: Dipeptidyl peptidase 4 membrane form (Dipeptidyl peptidase | DPP4_HUMAN  | 88263 | 100% | 14 | 15 | 28 | 22.20% |
| TPC1-p15 | (P27487) Dipeptidyl peptidase 4 (EC 3.4.14.5) (Dipeptidyl peptidase IV) (DPP IV) (T-cell activation antigen CD26) (TP103) (Adenosine deaminase complexing protein 2) (ADABP) [Contains: Dipeptidyl peptidase 4 membrane form (Dipeptidyl peptidase | DPP4_HUMAN  | 88263 | 100% | 7  | 8  | 17 | 10.70% |
| TPC1-p15 | (P27487) Dipeptidyl peptidase 4 (EC 3.4.14.5) (Dipeptidyl peptidase IV) (DPP IV) (T-cell activation antigen CD26) (TP103) (Adenosine deaminase complexing protein 2) (ADABP) [Contains: Dipeptidyl peptidase 4 membrane form (Dipeptidyl peptidase | DPP4_HUMAN  | 88263 | 100% | 5  | 5  | 8  | 8.62%  |

## Protein Identified Sequence Coverage in TPC-1

|          |                                                                                                                                                                                                                                                    |             |       |      |   |   |    |        |
|----------|----------------------------------------------------------------------------------------------------------------------------------------------------------------------------------------------------------------------------------------------------|-------------|-------|------|---|---|----|--------|
| TPC1-p15 | (P27487) Dipeptidyl peptidase 4 (EC 3.4.14.5) (Dipeptidyl peptidase IV) (DPP IV) (T-cell activation antigen CD26) (TP103) (Adenosine deaminase complexing protein 2) (ADABP) [Contains: Dipeptidyl peptidase 4 membrane form (Dipeptidyl peptidase | DPP4_HUMAN  | 88263 | 100% | 4 | 5 | 8  | 8.22%  |
| TPC1-p15 | (P27487) Dipeptidyl peptidase 4 (EC 3.4.14.5) (Dipeptidyl peptidase IV) (DPP IV) (T-cell activation antigen CD26) (TP103) (Adenosine deaminase complexing protein 2) (ADABP) [Contains: Dipeptidyl peptidase 4 membrane form (Dipeptidyl peptidase | DPP4_HUMAN  | 88263 | 100% | 5 | 5 | 11 | 8.88%  |
| TPC1-p15 | (P27487) Dipeptidyl peptidase 4 (EC 3.4.14.5) (Dipeptidyl peptidase IV) (DPP IV) (T-cell activation antigen CD26) (TP103) (Adenosine deaminase complexing protein 2) (ADABP) [Contains: Dipeptidyl peptidase 4 membrane form (Dipeptidyl peptidase | DPP4_HUMAN  | 88263 | 100% | 2 | 2 | 9  | 3.52%  |
| TPC1-p15 | (P27487) Dipeptidyl peptidase 4 (EC 3.4.14.5) (Dipeptidyl peptidase IV) (DPP IV) (T-cell activation antigen CD26) (TP103) (Adenosine deaminase complexing protein 2) (ADABP) [Contains: Dipeptidyl peptidase 4 membrane form (Dipeptidyl peptidase | DPP4_HUMAN  | 88263 | 100% | 3 | 4 | 79 | 7.83%  |
| TPC1-p15 | (P27487) Dipeptidyl peptidase 4 (EC 3.4.14.5) (Dipeptidyl peptidase IV) (DPP IV) (T-cell activation antigen CD26) (TP103) (Adenosine deaminase complexing protein 2) (ADABP) [Contains: Dipeptidyl peptidase 4 membrane form (Dipeptidyl peptidase | DPP4_HUMAN  | 88263 | 100% | 4 | 5 | 6  | 9.79%  |
| TPC1-p15 | (P27487) Dipeptidyl peptidase 4 (EC 3.4.14.5) (Dipeptidyl peptidase IV) (DPP IV) (T-cell activation antigen CD26) (TP103) (Adenosine deaminase complexing protein 2) (ADABP) [Contains: Dipeptidyl peptidase 4 membrane form (Dipeptidyl peptidase | DPP4_HUMAN  | 88263 | 100% | 2 | 2 | 4  | 5.22%  |
| TPC1-p15 | (P27658) Collagen alpha-1(VIII) chain precursor (Endothelial collagen)                                                                                                                                                                             | CO8A1_HUMAN | 73349 | 100% | 2 | 2 | 3  | 6.18%  |
| TPC1-p15 | (P27695) DNA-(apurinic or apyrimidinic site) lyase (EC 4.2.99.18) (AP endonuclease 1) (APEX nuclease) (APEN) (REF-1 protein)                                                                                                                       | APEX1_HUMAN | 35407 | 100% | 3 | 3 | 3  | 17.70% |
| TPC1-p15 | (P27695) DNA-(apurinic or apyrimidinic site) lyase (EC 4.2.99.18) (AP endonuclease 1) (APEX nuclease) (APEN) (REF-1 protein)                                                                                                                       | APEX1_HUMAN | 35407 | 100% | 3 | 3 | 5  | 14.20% |
| TPC1-p15 | (P27797) Calreticulin precursor (CRP55) (Calregulin) (HACBP) (ERp60) (grp60)                                                                                                                                                                       | CRTC_HUMAN  | 48125 | 100% | 5 | 5 | 7  | 28.80% |
| TPC1-p15 | (P27797) Calreticulin precursor (CRP55) (Calregulin) (HACBP) (ERp60) (grp60)                                                                                                                                                                       | CRTC_HUMAN  | 48125 | 100% | 4 | 4 | 7  | 23.50% |

Protein Identified Sequence Coverage in TPC-1

|          |                                                                                                                                                                                                                                                      |            |        |      |   |   |   |        |
|----------|------------------------------------------------------------------------------------------------------------------------------------------------------------------------------------------------------------------------------------------------------|------------|--------|------|---|---|---|--------|
| TPC1-p15 | (P27797) Calreticulin precursor (CRP55) (Calregulin) (HACBP) (ERp60) (grp60)                                                                                                                                                                         | CRTC_HUMAN | 48125  | 100% | 6 | 7 | 7 | 28.50% |
| TPC1-p15 | (P27797) Calreticulin precursor (CRP55) (Calregulin) (HACBP) (ERp60) (grp60)                                                                                                                                                                         | CRTC_HUMAN | 48125  | 100% | 5 | 5 | 7 | 21.10% |
| TPC1-p15 | (P27797) Calreticulin precursor (CRP55) (Calregulin) (HACBP) (ERp60) (grp60)                                                                                                                                                                         | CRTC_HUMAN | 48125  | 100% | 3 | 3 | 4 | 11.00% |
| TPC1-p15 | (P27797) Calreticulin precursor (CRP55) (Calregulin) (HACBP) (ERp60) (grp60)                                                                                                                                                                         | CRTC_HUMAN | 48125  | 100% | 2 | 3 | 8 | 9.59%  |
| TPC1-p15 | (P27797) Calreticulin precursor (CRP55) (Calregulin) (HACBP) (ERp60) (grp60)                                                                                                                                                                         | CRTC_HUMAN | 48125  | 100% | 4 | 5 | 9 | 21.30% |
| TPC1-p15 | (P27797) Calreticulin precursor (CRP55) (Calregulin) (HACBP) (ERp60) (grp60)                                                                                                                                                                         | CRTC_HUMAN | 48125  | 100% | 3 | 3 | 9 | 18.50% |
| TPC1-p15 | (P27816) Microtubule-associated protein 4 (MAP 4)                                                                                                                                                                                                    | MAP4_HUMAN | 121003 | 100% | 2 | 3 | 3 | 4.95%  |
| TPC1-p15 | (P27824) Calnexin precursor (Major histocompatibility complex class I antigen-binding protein p88) (p90) (IP90)                                                                                                                                      | CALX_HUMAN | 67552  | 100% | 2 | 2 | 2 | 5.24%  |
| TPC1-p15 | (P28799) Granulins precursor (Proepithelin) (PEPI) [Contains: Acrogranin; Paragranulin; Granulin-1 (Granulin G); Granulin-2 (Granulin F); Granulin-3 (Granulin B); Granulin-4 (Granulin A); Granulin-5 (Granulin C); Granulin-6 (Granulin D); Granul | GRN_HUMAN  | 63522  | 100% | 4 | 4 | 4 | 8.94%  |
| TPC1-p15 | (P28799) Granulins precursor (Proepithelin) (PEPI) [Contains: Acrogranin; Paragranulin; Granulin-1 (Granulin G); Granulin-2 (Granulin F); Granulin-3 (Granulin B); Granulin-4 (Granulin A); Granulin-5 (Granulin C); Granulin-6 (Granulin D); Granul | GRN_HUMAN  | 63522  | 100% | 2 | 2 | 4 | 4.72%  |
| TPC1-p15 | (P28799) Granulins precursor (Proepithelin) (PEPI) [Contains: Acrogranin; Paragranulin; Granulin-1 (Granulin G); Granulin-2 (Granulin F); Granulin-3 (Granulin B); Granulin-4 (Granulin A); Granulin-5 (Granulin C); Granulin-6 (Granulin D); Granul | GRN_HUMAN  | 63522  | 100% | 3 | 3 | 4 | 6.91%  |
| TPC1-p15 | (P28799) Granulins precursor (Proepithelin) (PEPI) [Contains: Acrogranin; Paragranulin; Granulin-1 (Granulin G); Granulin-2 (Granulin F); Granulin-3 (Granulin B); Granulin-4 (Granulin A); Granulin-5 (Granulin C); Granulin-6 (Granulin D); Granul | GRN_HUMAN  | 63522  | 100% | 4 | 4 | 5 | 10.60% |
| TPC1-p15 | (P28799) Granulins precursor (Proepithelin) (PEPI) [Contains: Acrogranin; Paragranulin; Granulin-1 (Granulin G); Granulin-2 (Granulin F); Granulin-3 (Granulin B); Granulin-4 (Granulin A); Granulin-5 (Granulin C); Granulin-6 (Granulin D); Granul | GRN_HUMAN  | 63522  | 100% | 3 | 4 | 5 | 9.95%  |

## Protein Identified Sequence Coverage in TPC-1

|          |                                                                                                                                                                                                                                                      |                |        |      |   |   |    |        |
|----------|------------------------------------------------------------------------------------------------------------------------------------------------------------------------------------------------------------------------------------------------------|----------------|--------|------|---|---|----|--------|
| TPC1-p15 | (P28799) Granulins precursor (Proepithelin) (PEPI) [Contains: Acrogranin; Paragranulin; Granulin-1 (Granulin G); Granulin-2 (Granulin F); Granulin-3 (Granulin B); Granulin-4 (Granulin A); Granulin-5 (Granulin C); Granulin-6 (Granulin D); Granul | GRN_HUMAN      | 63522  | 100% | 2 | 2 | 4  | 8.26%  |
| TPC1-p15 | (P28827) Receptor-type tyrosine-protein phosphatase mu precursor (EC 3.1.3.48) (Protein-tyrosine phosphatase mu) (R-PTP-mu)                                                                                                                          | PTPRM_HUMAN    | 163616 | 100% | 2 | 2 | 3  | 2.00%  |
| TPC1-p15 | (P28827) Receptor-type tyrosine-protein phosphatase mu precursor (EC 3.1.3.48) (Protein-tyrosine phosphatase mu) (R-PTP-mu)                                                                                                                          | PTPRM_HUMAN    | 163616 | 100% | 3 | 3 | 4  | 5.03%  |
| TPC1-p15 | (P28827) Receptor-type tyrosine-protein phosphatase mu precursor (EC 3.1.3.48) (Protein-tyrosine phosphatase mu) (R-PTP-mu)                                                                                                                          | PTPRM_HUMAN    | 163616 | 100% | 3 | 3 | 3  | 3.44%  |
| TPC1-p15 | (P29043) 47 kDa heat shock protein precursor (Collagen-binding protein 1) (Colligin 1)                                                                                                                                                               | HSP47_HUMAN,SP | 46251  | 100% | 3 | 3 | 5  | 15.10% |
| TPC1-p15 | (P29043) 47 kDa heat shock protein precursor (Collagen-binding protein 1) (Colligin 1)                                                                                                                                                               | HSP47_HUMAN,SP | 46424  | 100% | 3 | 4 | 5  | 15.10% |
| TPC1-p15 | (P29043) 47 kDa heat shock protein precursor (Collagen-binding protein 1) (Colligin 1)                                                                                                                                                               | HSP47_HUMAN,SP | 46424  | 100% | 2 | 2 | 2  | 8.85%  |
| TPC1-p15 | (P29043) 47 kDa heat shock protein precursor (Collagen-binding protein 1) (Colligin 1)                                                                                                                                                               | HSP47_HUMAN,SP | 46424  | 100% | 2 | 2 | 4  | 8.85%  |
| TPC1-p15 | (P29043) 47 kDa heat shock protein precursor (Collagen-binding protein 1) (Colligin 1)                                                                                                                                                               | HSP47_HUMAN,SP | 46424  | 100% | 2 | 3 | 10 | 9.81%  |
| TPC1-p15 | (P29401) Transketolase (EC 2.2.1.1) (TK)                                                                                                                                                                                                             | TKT_HUMAN      | 67861  | 100% | 2 | 2 | 2  | 5.78%  |
| TPC1-p15 | (P29966) Myristoylated alanine-rich C-kinase substrate (MARCKS) (Protein kinase C substrate, 80 kDa protein, light chain) (PKCSL) (80K-L protein)                                                                                                    | MARCS_HUMAN    | 31405  | 100% | 2 | 2 | 3  | 15.10% |
| TPC1-p15 | (P29966) Myristoylated alanine-rich C-kinase substrate (MARCKS) (Protein kinase C substrate, 80 kDa protein, light chain) (PKCSL) (80K-L protein)                                                                                                    | MARCS_HUMAN    | 31405  | 100% | 4 | 4 | 4  | 30.50% |
| TPC1-p15 | (P29966) Myristoylated alanine-rich C-kinase substrate (MARCKS) (Protein kinase C substrate, 80 kDa protein, light chain) (PKCSL) (80K-L protein)                                                                                                    | MARCS_HUMAN    | 31405  | 100% | 2 | 2 | 3  | 11.20% |
| TPC1-p15 | (P30040) Endoplasmic reticulum protein ERp29 precursor (ERp31) (ERp28)                                                                                                                                                                               | ERP29_HUMAN    | 28977  | 100% | 5 | 6 | 9  | 28.40% |
| TPC1-p15 | (P30040) Endoplasmic reticulum protein ERp29 precursor (ERp31) (ERp28)                                                                                                                                                                               | ERP29_HUMAN    | 28977  | 100% | 4 | 4 | 6  | 19.20% |
| TPC1-p15 | (P30040) Endoplasmic reticulum protein ERp29 precursor (ERp31) (ERp28)                                                                                                                                                                               | ERP29_HUMAN    | 28977  | 100% | 7 | 7 | 7  | 36.00% |
| TPC1-p15 | (P30040) Endoplasmic reticulum protein ERp29 precursor (ERp31) (ERp28)                                                                                                                                                                               | ERP29_HUMAN    | 28977  | 100% | 5 | 5 | 8  | 28.40% |
| TPC1-p15 | (P30040) Endoplasmic reticulum protein ERp29 precursor (ERp31) (ERp28)                                                                                                                                                                               | ERP29_HUMAN    | 28977  | 100% | 2 | 2 | 3  | 21.50% |

## Protein Identified Sequence Coverage in TPC-1

|          |                                                                                                                                                                                                                                                    |             |       |      |   |   |    |        |
|----------|----------------------------------------------------------------------------------------------------------------------------------------------------------------------------------------------------------------------------------------------------|-------------|-------|------|---|---|----|--------|
| TPC1-p15 | (P30040) Endoplasmic reticulum protein ERp29 precursor (ERp31) (ERp28)                                                                                                                                                                             | ERP29_HUMAN | 28977 | 100% | 4 | 5 | 14 | 28.00% |
| TPC1-p15 | (P30040) Endoplasmic reticulum protein ERp29 precursor (ERp31) (ERp28)                                                                                                                                                                             | ERP29_HUMAN | 28977 | 100% | 3 | 4 | 25 | 25.30% |
| TPC1-p15 | (P30041) Peroxiredoxin-6 (EC 1.11.1.15) (Antioxidant protein 2) (1-Cys peroxiredoxin) (1-Cys PRX) (Acidic calcium-independent phospholipase A2) (EC 3.1.1.-) (aiPLA2) (Non-selenium glutathione peroxidase) (EC 1.11.1.7) (NSGPx) (24 kDa protein) | PRDX6_HUMAN | 24887 | 100% | 6 | 8 | 12 | 37.20% |
| TPC1-p15 | (P30041) Peroxiredoxin-6 (EC 1.11.1.15) (Antioxidant protein 2) (1-Cys peroxiredoxin) (1-Cys PRX) (Acidic calcium-independent phospholipase A2) (EC 3.1.1.-) (aiPLA2) (Non-selenium glutathione peroxidase) (EC 1.11.1.7) (NSGPx) (24 kDa protein) | PRDX6_HUMAN | 24887 | 100% | 5 | 7 | 11 | 34.10% |
| TPC1-p15 | (P30041) Peroxiredoxin-6 (EC 1.11.1.15) (Antioxidant protein 2) (1-Cys peroxiredoxin) (1-Cys PRX) (Acidic calcium-independent phospholipase A2) (EC 3.1.1.-) (aiPLA2) (Non-selenium glutathione peroxidase) (EC 1.11.1.7) (NSGPx) (24 kDa protein) | PRDX6_HUMAN | 24887 | 100% | 6 | 6 | 7  | 39.90% |
| TPC1-p15 | (P30041) Peroxiredoxin-6 (EC 1.11.1.15) (Antioxidant protein 2) (1-Cys peroxiredoxin) (1-Cys PRX) (Acidic calcium-independent phospholipase A2) (EC 3.1.1.-) (aiPLA2) (Non-selenium glutathione peroxidase) (EC 1.11.1.7) (NSGPx) (24 kDa protein) | PRDX6_HUMAN | 24887 | 100% | 5 | 5 | 7  | 30.50% |
| TPC1-p15 | (P30041) Peroxiredoxin-6 (EC 1.11.1.15) (Antioxidant protein 2) (1-Cys peroxiredoxin) (1-Cys PRX) (Acidic calcium-independent phospholipase A2) (EC 3.1.1.-) (aiPLA2) (Non-selenium glutathione peroxidase) (EC 1.11.1.7) (NSGPx) (24 kDa protein) | PRDX6_HUMAN | 24887 | 100% | 2 | 3 | 4  | 17.00% |
| TPC1-p15 | (P30041) Peroxiredoxin-6 (EC 1.11.1.15) (Antioxidant protein 2) (1-Cys peroxiredoxin) (1-Cys PRX) (Acidic calcium-independent phospholipase A2) (EC 3.1.1.-) (aiPLA2) (Non-selenium glutathione peroxidase) (EC 1.11.1.7) (NSGPx) (24 kDa protein) | PRDX6_HUMAN | 24887 | 100% | 4 | 5 | 7  | 26.00% |
| TPC1-p15 | (P30041) Peroxiredoxin-6 (EC 1.11.1.15) (Antioxidant protein 2) (1-Cys peroxiredoxin) (1-Cys PRX) (Acidic calcium-independent phospholipase A2) (EC 3.1.1.-) (aiPLA2) (Non-selenium glutathione peroxidase) (EC 1.11.1.7) (NSGPx) (24 kDa protein) | PRDX6_HUMAN | 24887 | 100% | 2 | 4 | 9  | 15.20% |
| TPC1-p15 | (P30049) ATP synthase delta chain, mitochondrial precursor (EC 3.6.3.14)                                                                                                                                                                           | ATPD_HUMAN  | 17472 | 100% | 2 | 2 | 2  | 13.70% |
| TPC1-p15 | (P30050) 60S ribosomal protein L12                                                                                                                                                                                                                 | RL12_HUMAN  | 17801 | 100% | 4 | 4 | 7  | 40.00% |

## Protein Identified Sequence Coverage in TPC-1

|          |                                                                                                                                                                                                                    |             |       |      |   |   |    |        |
|----------|--------------------------------------------------------------------------------------------------------------------------------------------------------------------------------------------------------------------|-------------|-------|------|---|---|----|--------|
| TPC1-p15 | (P30050) 60S ribosomal protein L12                                                                                                                                                                                 | RL12_HUMAN  | 17801 | 100% | 2 | 3 | 6  | 18.80% |
| TPC1-p15 | (P30050) 60S ribosomal protein L12                                                                                                                                                                                 | RL12_HUMAN  | 17801 | 100% | 3 | 4 | 4  | 30.30% |
| TPC1-p15 | (P30050) 60S ribosomal protein L12                                                                                                                                                                                 | RL12_HUMAN  | 17801 | 100% | 3 | 4 | 7  | 28.50% |
| TPC1-p15 | (P30101) Protein disulfide-isomerase A3 precursor (EC 5.3.4.1) (Disulfide isomerase ER-60) (ERp60) (58 kDa microsomal protein) (p58) (ERp57) (58 kDa glucose-regulated protein)                                    | PDIA3_HUMAN | 56767 | 100% | 2 | 2 | 3  | 4.16%  |
| TPC1-p15 | (P30101) Protein disulfide-isomerase A3 precursor (EC 5.3.4.1) (Disulfide isomerase ER-60) (ERp60) (58 kDa microsomal protein) (p58) (ERp57) (58 kDa glucose-regulated protein)                                    | PDIA3_HUMAN | 56767 | 100% | 2 | 2 | 3  | 2.38%  |
| TPC1-p15 | (P30508) HLA class I histocompatibility antigen, Cw-12 alpha chain precursor (MHC class I antigen Cw*12)                                                                                                           | 1C12_HUMAN  | 40867 | 100% | 2 | 2 | 2  | 7.10%  |
| TPC1-p15 | (P30508) HLA class I histocompatibility antigen, Cw-12 alpha chain precursor (MHC class I antigen Cw*12)                                                                                                           | 1C12_HUMAN  | 40867 | 100% | 2 | 2 | 2  | 10.40% |
| TPC1-p15 | (P30530) Tyrosine-protein kinase receptor UFO precursor (EC 2.7.10.1) (AXL oncogene)                                                                                                                               | UFO_HUMAN   | 97418 | 100% | 2 | 2 | 2  | 8.79%  |
| TPC1-p15 | (P31949) Protein S100-A11 (S100 calcium-binding protein A11) (Protein S100C) (Calgizzarin) (MLN 70)                                                                                                                | S10AB_HUMAN | 11723 | 100% | 2 | 2 | 2  | 25.70% |
| TPC1-p15 | (P32119) Peroxiredoxin-2 (EC 1.11.1.15) (Thioredoxin peroxidase 1) (Thioredoxin-dependent peroxide reductase 1) (Thiol-specific antioxidant protein) (TSA) (PRP) (Natural killer cell-enhancing factor B) (NKEF-B) | PRDX2_HUMAN | 21743 | 100% | 2 | 2 | 3  | 9.14%  |
| TPC1-p15 | (P32119) Peroxiredoxin-2 (EC 1.11.1.15) (Thioredoxin peroxidase 1) (Thioredoxin-dependent peroxide reductase 1) (Thiol-specific antioxidant protein) (TSA) (PRP) (Natural killer cell-enhancing factor B) (NKEF-B) | PRDX2_HUMAN | 21743 | 100% | 2 | 2 | 3  | 9.14%  |
| TPC1-p15 | (P32119) Peroxiredoxin-2 (EC 1.11.1.15) (Thioredoxin peroxidase 1) (Thioredoxin-dependent peroxide reductase 1) (Thiol-specific antioxidant protein) (TSA) (PRP) (Natural killer cell-enhancing factor B) (NKEF-B) | PRDX2_HUMAN | 21743 | 100% | 2 | 2 | 4  | 14.70% |
| TPC1-p15 | (P32119) Peroxiredoxin-2 (EC 1.11.1.15) (Thioredoxin peroxidase 1) (Thioredoxin-dependent peroxide reductase 1) (Thiol-specific antioxidant protein) (TSA) (PRP) (Natural killer cell-enhancing factor B) (NKEF-B) | PRDX2_HUMAN | 21743 | 100% | 2 | 3 | 10 | 26.40% |
| TPC1-p15 | (P32119) Peroxiredoxin-2 (EC 1.11.1.15) (Thioredoxin peroxidase 1) (Thioredoxin-dependent peroxide reductase 1) (Thiol-specific antioxidant protein) (TSA) (PRP) (Natural killer cell-enhancing factor B) (NKEF-B) | PRDX2_HUMAN | 21743 | 100% | 2 | 2 | 3  | 21.30% |

Protein Identified Sequence Coverage in TPC-1

|          |                                                                                                                                                                                                            |            |       |      |   |   |   |        |
|----------|------------------------------------------------------------------------------------------------------------------------------------------------------------------------------------------------------------|------------|-------|------|---|---|---|--------|
| TPC1-p15 | (P34059) N-acetylgalactosamine-6-sulfatase precursor (EC 3.1.6.4) (N-acetylgalactosamine-6-sulfate sulfatase) (Galactose-6-sulfate sulfatase) (GalNAc6S sulfatase) (Chondroitinsulfatase) (Chondroitinase) | GA6S_HUMAN | 58009 | 100% | 4 | 4 | 5 | 9.20%  |
| TPC1-p15 | (P34059) N-acetylgalactosamine-6-sulfatase precursor (EC 3.1.6.4) (N-acetylgalactosamine-6-sulfate sulfatase) (Galactose-6-sulfate sulfatase) (GalNAc6S sulfatase) (Chondroitinsulfatase) (Chondroitinase) | GA6S_HUMAN | 58009 | 100% | 3 | 3 | 4 | 9.58%  |
| TPC1-p15 | (P34059) N-acetylgalactosamine-6-sulfatase precursor (EC 3.1.6.4) (N-acetylgalactosamine-6-sulfate sulfatase) (Galactose-6-sulfate sulfatase) (GalNAc6S sulfatase) (Chondroitinsulfatase) (Chondroitinase) | GA6S_HUMAN | 58009 | 100% | 2 | 2 | 2 | 7.66%  |
| TPC1-p15 | (P34059) N-acetylgalactosamine-6-sulfatase precursor (EC 3.1.6.4) (N-acetylgalactosamine-6-sulfate sulfatase) (Galactose-6-sulfate sulfatase) (GalNAc6S sulfatase) (Chondroitinsulfatase) (Chondroitinase) | GA6S_HUMAN | 58009 | 100% | 2 | 2 | 3 | 5.56%  |
| TPC1-p15 | (P34059) N-acetylgalactosamine-6-sulfatase precursor (EC 3.1.6.4) (N-acetylgalactosamine-6-sulfate sulfatase) (Galactose-6-sulfate sulfatase) (GalNAc6S sulfatase) (Chondroitinsulfatase) (Chondroitinase) | GA6S_HUMAN | 58009 | 100% | 2 | 2 | 3 | 11.50% |
| TPC1-p15 | (P34059) N-acetylgalactosamine-6-sulfatase precursor (EC 3.1.6.4) (N-acetylgalactosamine-6-sulfate sulfatase) (Galactose-6-sulfate sulfatase) (GalNAc6S sulfatase) (Chondroitinsulfatase) (Chondroitinase) | GA6S_HUMAN | 58009 | 100% | 3 | 4 | 6 | 8.43%  |
| TPC1-p15 | (P34059) N-acetylgalactosamine-6-sulfatase precursor (EC 3.1.6.4) (N-acetylgalactosamine-6-sulfate sulfatase) (Galactose-6-sulfate sulfatase) (GalNAc6S sulfatase) (Chondroitinsulfatase) (Chondroitinase) | GA6S_HUMAN | 58009 | 100% | 2 | 3 | 3 | 8.43%  |
| TPC1-p15 | (P34059) N-acetylgalactosamine-6-sulfatase precursor (EC 3.1.6.4) (N-acetylgalactosamine-6-sulfate sulfatase) (Galactose-6-sulfate sulfatase) (GalNAc6S sulfatase) (Chondroitinsulfatase) (Chondroitinase) | GA6S_HUMAN | 58009 | 100% | 2 | 2 | 2 | 3.83%  |
| TPC1-p15 | (P34059) N-acetylgalactosamine-6-sulfatase precursor (EC 3.1.6.4) (N-acetylgalactosamine-6-sulfate sulfatase) (Galactose-6-sulfate sulfatase) (GalNAc6S sulfatase) (Chondroitinsulfatase) (Chondroitinase) | GA6S_HUMAN | 58009 | 100% | 2 | 2 | 4 | 5.94%  |



## Protein Identified Sequence Coverage in TPC-1

|          |                                                                                                                                                                                                                                                    |            |        |      |   |   |    |        |
|----------|----------------------------------------------------------------------------------------------------------------------------------------------------------------------------------------------------------------------------------------------------|------------|--------|------|---|---|----|--------|
| TPC1-p15 | (P34059) N-acetylgalactosamine-6-sulfatase precursor (EC 3.1.6.4) (N-acetylgalactosamine-6-sulfate sulfatase) (Galactose-6-sulfate sulfatase) (GalNAc6S sulfatase) (Chondroitinsulfatase) (Chondroitinase)                                         | GA6S_HUMAN | 58009  | 100% | 2 | 3 | 6  | 8.81%  |
| TPC1-p15 | (P35241) Radixin                                                                                                                                                                                                                                   | RADI_HUMAN | 68548  | 100% | 2 | 3 | 5  | 8.92%  |
| TPC1-p15 | (P35475) Alpha-L-iduronidase precursor (EC 3.2.1.76)                                                                                                                                                                                               | IDUA_HUMAN | 72653  | 100% | 2 | 2 | 2  | 6.43%  |
| TPC1-p15 | (P35475) Alpha-L-iduronidase precursor (EC 3.2.1.76)                                                                                                                                                                                               | IDUA_HUMAN | 72653  | 100% | 3 | 3 | 3  | 11.50% |
| TPC1-p15 | (P35579) Myosin-9 (Myosin heavy chain, nonmuscle IIa) (Nonmuscle myosin heavy chain IIa) (NMMHC IIa) (NMMHC-IIA) (Cellular myosin heavy chain, type A) (Nonmuscle myosin heavy chain-A) (NMMHC-A)                                                  | MYH9_HUMAN | 226388 | 100% | 2 | 2 | 2  | 1.33%  |
| TPC1-p15 | (P35579) Myosin-9 (Myosin heavy chain, nonmuscle IIa) (Nonmuscle myosin heavy chain IIa) (NMMHC IIa) (NMMHC-IIA) (Cellular myosin heavy chain, type A) (Nonmuscle myosin heavy chain-A) (NMMHC-A)                                                  | MYH9_HUMAN | 226388 | 100% | 2 | 2 | 2  | 1.99%  |
| TPC1-p15 | (P35579) Myosin-9 (Myosin heavy chain, nonmuscle IIa) (Nonmuscle myosin heavy chain IIa) (NMMHC IIa) (NMMHC-IIA) (Cellular myosin heavy chain, type A) (Nonmuscle myosin heavy chain-A) (NMMHC-A)                                                  | MYH9_HUMAN | 226388 | 100% | 4 | 4 | 5  | 3.88%  |
| TPC1-p15 | (P35579) Myosin-9 (Myosin heavy chain, nonmuscle IIa) (Nonmuscle myosin heavy chain IIa) (NMMHC IIa) (NMMHC-IIA) (Cellular myosin heavy chain, type A) (Nonmuscle myosin heavy chain-A) (NMMHC-A)                                                  | MYH9_HUMAN | 226388 | 100% | 3 | 4 | 8  | 3.57%  |
| TPC1-p15 | (P35613) Basigin precursor (Leukocyte activation antigen M6) (Collagenase stimulatory factor) (Extracellular matrix metalloproteinase inducer) (EMMPRIN) (5F7) (Tumor cell-derived collagenase stimulatory factor) (TCSF) (OK blood group antigen) | BASI_HUMAN | 42182  | 100% | 7 | 9 | 15 | 30.10% |
| TPC1-p15 | (P35613) Basigin precursor (Leukocyte activation antigen M6) (Collagenase stimulatory factor) (Extracellular matrix metalloproteinase inducer) (EMMPRIN) (5F7) (Tumor cell-derived collagenase stimulatory factor) (TCSF) (OK blood group antigen) | BASI_HUMAN | 42182  | 100% | 7 | 8 | 13 | 31.40% |
| TPC1-p15 | (P35613) Basigin precursor (Leukocyte activation antigen M6) (Collagenase stimulatory factor) (Extracellular matrix metalloproteinase inducer) (EMMPRIN) (5F7) (Tumor cell-derived collagenase stimulatory factor) (TCSF) (OK blood group antigen) | BASI_HUMAN | 42182  | 100% | 5 | 5 | 5  | 23.40% |

## Protein Identified Sequence Coverage in TPC-1

|          |                                                                                                                                                                                                                                                    |             |       |      |   |   |    |        |
|----------|----------------------------------------------------------------------------------------------------------------------------------------------------------------------------------------------------------------------------------------------------|-------------|-------|------|---|---|----|--------|
| TPC1-p15 | (P35613) Basigin precursor (Leukocyte activation antigen M6) (Collagenase stimulatory factor) (Extracellular matrix metalloproteinase inducer) (EMMPRIN) (5F7) (Tumor cell-derived collagenase stimulatory factor) (TCSF) (OK blood group antigen) | BASI_HUMAN  | 42182 | 100% | 6 | 6 | 11 | 21.00% |
| TPC1-p15 | (P35613) Basigin precursor (Leukocyte activation antigen M6) (Collagenase stimulatory factor) (Extracellular matrix metalloproteinase inducer) (EMMPRIN) (5F7) (Tumor cell-derived collagenase stimulatory factor) (TCSF) (OK blood group antigen) | BASI_HUMAN  | 42182 | 100% | 3 | 3 | 3  | 13.80% |
| TPC1-p15 | (P35613) Basigin precursor (Leukocyte activation antigen M6) (Collagenase stimulatory factor) (Extracellular matrix metalloproteinase inducer) (EMMPRIN) (5F7) (Tumor cell-derived collagenase stimulatory factor) (TCSF) (OK blood group antigen) | BASI_HUMAN  | 42182 | 100% | 5 | 6 | 10 | 17.40% |
| TPC1-p15 | (P35613) Basigin precursor (Leukocyte activation antigen M6) (Collagenase stimulatory factor) (Extracellular matrix metalloproteinase inducer) (EMMPRIN) (5F7) (Tumor cell-derived collagenase stimulatory factor) (TCSF) (OK blood group antigen) | BASI_HUMAN  | 42182 | 100% | 6 | 8 | 10 | 23.60% |
| TPC1-p15 | (P35613) Basigin precursor (Leukocyte activation antigen M6) (Collagenase stimulatory factor) (Extracellular matrix metalloproteinase inducer) (EMMPRIN) (5F7) (Tumor cell-derived collagenase stimulatory factor) (TCSF) (OK blood group antigen) | BASI_HUMAN  | 42182 | 100% | 6 | 7 | 13 | 22.10% |
| TPC1-p15 | (P35613) Basigin precursor (Leukocyte activation antigen M6) (Collagenase stimulatory factor) (Extracellular matrix metalloproteinase inducer) (EMMPRIN) (5F7) (Tumor cell-derived collagenase stimulatory factor) (TCSF) (OK blood group antigen) | BASI_HUMAN  | 42182 | 100% | 2 | 2 | 3  | 12.70% |
| TPC1-p15 | (P35613) Basigin precursor (Leukocyte activation antigen M6) (Collagenase stimulatory factor) (Extracellular matrix metalloproteinase inducer) (EMMPRIN) (5F7) (Tumor cell-derived collagenase stimulatory factor) (TCSF) (OK blood group antigen) | BASI_HUMAN  | 42182 | 100% | 3 | 3 | 28 | 12.50% |
| TPC1-p15 | (P36578) 60S ribosomal protein L4 (L1)                                                                                                                                                                                                             | RL4_HUMAN   | 47550 | 100% | 3 | 3 | 4  | 11.30% |
| TPC1-p15 | (P36578) 60S ribosomal protein L4 (L1)                                                                                                                                                                                                             | RL4_HUMAN   | 47550 | 100% | 4 | 4 | 7  | 13.40% |
| TPC1-p15 | (P36578) 60S ribosomal protein L4 (L1)                                                                                                                                                                                                             | RL4_HUMAN   | 47550 | 100% | 2 | 2 | 2  | 4.93%  |
| TPC1-p15 | (P36578) 60S ribosomal protein L4 (L1)                                                                                                                                                                                                             | RL4_HUMAN   | 47550 | 100% | 5 | 5 | 7  | 18.10% |
| TPC1-p15 | (P36578) 60S ribosomal protein L4 (L1)                                                                                                                                                                                                             | RL4_HUMAN   | 47550 | 100% | 2 | 2 | 5  | 5.87%  |
| TPC1-p15 | (P36578) 60S ribosomal protein L4 (L1)                                                                                                                                                                                                             | RL4_HUMAN   | 47550 | 100% | 3 | 3 | 3  | 14.10% |
| TPC1-p15 | (P37802) Transgelin-2 (SM22-alpha homolog)                                                                                                                                                                                                         | TAGL2_HUMAN | 22243 | 100% | 3 | 3 | 5  | 20.70% |

## Protein Identified Sequence Coverage in TPC-1

|          |                                                                                                                                                                                                                                                    |             |        |      |   |   |    |        |
|----------|----------------------------------------------------------------------------------------------------------------------------------------------------------------------------------------------------------------------------------------------------|-------------|--------|------|---|---|----|--------|
| TPC1-p15 | (P37802) Transgelin-2 (SM22-alpha homolog)                                                                                                                                                                                                         | TAGL2_HUMAN | 22243  | 100% | 3 | 3 | 3  | 22.20% |
| TPC1-p15 | (P37802) Transgelin-2 (SM22-alpha homolog)                                                                                                                                                                                                         | TAGL2_HUMAN | 22243  | 100% | 5 | 5 | 5  | 34.80% |
| TPC1-p15 | (P37802) Transgelin-2 (SM22-alpha homolog)                                                                                                                                                                                                         | TAGL2_HUMAN | 22243  | 100% | 5 | 5 | 8  | 31.30% |
| TPC1-p15 | (P37802) Transgelin-2 (SM22-alpha homolog)                                                                                                                                                                                                         | TAGL2_HUMAN | 22243  | 100% | 2 | 2 | 3  | 15.20% |
| TPC1-p15 | (P37837) Transaldolase (EC 2.2.1.2)                                                                                                                                                                                                                | TALDO_HUMAN | 37524  | 100% | 5 | 5 | 8  | 19.60% |
| TPC1-p15 | (P37837) Transaldolase (EC 2.2.1.2)                                                                                                                                                                                                                | TALDO_HUMAN | 37524  | 100% | 6 | 6 | 8  | 18.70% |
| TPC1-p15 | (P37837) Transaldolase (EC 2.2.1.2)                                                                                                                                                                                                                | TALDO_HUMAN | 37524  | 100% | 5 | 5 | 5  | 15.10% |
| TPC1-p15 | (P37837) Transaldolase (EC 2.2.1.2)                                                                                                                                                                                                                | TALDO_HUMAN | 37524  | 100% | 5 | 5 | 10 | 16.00% |
| TPC1-p15 | (P37837) Transaldolase (EC 2.2.1.2)                                                                                                                                                                                                                | TALDO_HUMAN | 37524  | 100% | 4 | 4 | 4  | 13.40% |
| TPC1-p15 | (P37837) Transaldolase (EC 2.2.1.2)                                                                                                                                                                                                                | TALDO_HUMAN | 37524  | 100% | 2 | 2 | 3  | 18.40% |
| TPC1-p15 | (P39023) 60S ribosomal protein L3 (HIV-1 TAR RNA-binding protein B) (TARBP-B)                                                                                                                                                                      | RL3_HUMAN   | 45960  | 100% | 2 | 2 | 2  | 8.21%  |
| TPC1-p15 | (P39060) Collagen alpha-1(XVIII) chain precursor [Contains: Endostatin]                                                                                                                                                                            | COIA1_HUMAN | 153809 | 100% | 2 | 2 | 3  | 3.17%  |
| TPC1-p15 | (P39060) Collagen alpha-1(XVIII) chain precursor [Contains: Endostatin]                                                                                                                                                                            | COIA1_HUMAN | 153809 | 100% | 2 | 2 | 2  | 3.17%  |
| TPC1-p15 | (P39060) Collagen alpha-1(XVIII) chain precursor [Contains: Endostatin]                                                                                                                                                                            | COIA1_HUMAN | 153809 | 100% | 3 | 3 | 3  | 6.60%  |
| TPC1-p15 | (P39060) Collagen alpha-1(XVIII) chain precursor [Contains: Endostatin]                                                                                                                                                                            | COIA1_HUMAN | 153809 | 100% | 2 | 3 | 4  | 3.43%  |
| TPC1-p15 | (P42167) Lamina-associated polypeptide 2, isoforms beta/gamma (Thymopoietin, isoforms beta/gamma) (TP beta/gamma) (Thymopoietin-related peptide isoforms beta/gamma) (TPRP isoforms beta/gamma) [Contains: Thymopoietin (TP) (Splenin); Thymopenti | LAP2B_HUMAN | 50522  | 100% | 2 | 2 | 3  | 8.61%  |
| TPC1-p15 | (P42167) Lamina-associated polypeptide 2, isoforms beta/gamma (Thymopoietin, isoforms beta/gamma) (TP beta/gamma) (Thymopoietin-related peptide isoforms beta/gamma) (TPRP isoforms beta/gamma) [Contains: Thymopoietin (TP) (Splenin); Thymopenti | LAP2B_HUMAN | 50522  | 100% | 2 | 2 | 3  | 8.39%  |
| TPC1-p15 | (P42167) Lamina-associated polypeptide 2, isoforms beta/gamma (Thymopoietin, isoforms beta/gamma) (TP beta/gamma) (Thymopoietin-related peptide isoforms beta/gamma) (TPRP isoforms beta/gamma) [Contains: Thymopoietin (TP) (Splenin); Thymopenti | LAP2B_HUMAN | 50522  | 100% | 2 | 2 | 2  | 9.05%  |
| TPC1-p15 | (P42167) Lamina-associated polypeptide 2, isoforms beta/gamma (Thymopoietin, isoforms beta/gamma) (TP beta/gamma) (Thymopoietin-related peptide isoforms beta/gamma) (TPRP isoforms beta/gamma) [Contains: Thymopoietin (TP) (Splenin); Thymopenti | LAP2B_HUMAN | 50522  | 100% | 2 | 2 | 4  | 7.95%  |

Protein Identified Sequence Coverage in TPC-1

|          |                                                                                                                                                                                                                                                    |             |       |      |   |   |    |        |
|----------|----------------------------------------------------------------------------------------------------------------------------------------------------------------------------------------------------------------------------------------------------|-------------|-------|------|---|---|----|--------|
| TPC1-p15 | (P42167) Lamina-associated polypeptide 2, isoforms beta/gamma (Thymopoietin, isoforms beta/gamma) (TP beta/gamma) (Thymopoietin-related peptide isoforms beta/gamma) (TPRP isoforms beta/gamma) [Contains: Thymopoietin (TP) (Splenin); Thymopenti | LAP2B_HUMAN | 50522 | 100% | 2 | 3 | 3  | 10.60% |
| TPC1-p15 | (P42785) Lysosomal Pro-X carboxypeptidase precursor (EC 3.4.16.2) (Prolylcarboxypeptidase) (PRCP) (Proline carboxypeptidase) (Angiotensinase C) (Lysosomal carboxypeptidase C)                                                                     | PCP_HUMAN   | 55783 | 100% | 7 | 9 | 23 | 23.00% |
| TPC1-p15 | (P42785) Lysosomal Pro-X carboxypeptidase precursor (EC 3.4.16.2) (Prolylcarboxypeptidase) (PRCP) (Proline carboxypeptidase) (Angiotensinase C) (Lysosomal carboxypeptidase C)                                                                     | PCP_HUMAN   | 55783 | 100% | 8 | 9 | 16 | 20.00% |
| TPC1-p15 | (P42785) Lysosomal Pro-X carboxypeptidase precursor (EC 3.4.16.2) (Prolylcarboxypeptidase) (PRCP) (Proline carboxypeptidase) (Angiotensinase C) (Lysosomal carboxypeptidase C)                                                                     | PCP_HUMAN   | 55783 | 100% | 7 | 9 | 11 | 21.60% |
| TPC1-p15 | (P42785) Lysosomal Pro-X carboxypeptidase precursor (EC 3.4.16.2) (Prolylcarboxypeptidase) (PRCP) (Proline carboxypeptidase) (Angiotensinase C) (Lysosomal carboxypeptidase C)                                                                     | PCP_HUMAN   | 55783 | 100% | 5 | 5 | 8  | 14.30% |
| TPC1-p15 | (P42785) Lysosomal Pro-X carboxypeptidase precursor (EC 3.4.16.2) (Prolylcarboxypeptidase) (PRCP) (Proline carboxypeptidase) (Angiotensinase C) (Lysosomal carboxypeptidase C)                                                                     | PCP_HUMAN   | 55783 | 100% | 3 | 3 | 4  | 8.87%  |
| TPC1-p15 | (P42785) Lysosomal Pro-X carboxypeptidase precursor (EC 3.4.16.2) (Prolylcarboxypeptidase) (PRCP) (Proline carboxypeptidase) (Angiotensinase C) (Lysosomal carboxypeptidase C)                                                                     | PCP_HUMAN   | 55783 | 100% | 5 | 5 | 8  | 9.48%  |
| TPC1-p15 | (P42785) Lysosomal Pro-X carboxypeptidase precursor (EC 3.4.16.2) (Prolylcarboxypeptidase) (PRCP) (Proline carboxypeptidase) (Angiotensinase C) (Lysosomal carboxypeptidase C)                                                                     | PCP_HUMAN   | 55783 | 100% | 3 | 6 | 22 | 13.90% |
| TPC1-p15 | (P42785) Lysosomal Pro-X carboxypeptidase precursor (EC 3.4.16.2) (Prolylcarboxypeptidase) (PRCP) (Proline carboxypeptidase) (Angiotensinase C) (Lysosomal carboxypeptidase C)                                                                     | PCP_HUMAN   | 55783 | 100% | 2 | 2 | 3  | 8.06%  |

## Protein Identified Sequence Coverage in TPC-1

|          |                                                                                                                                                                                                                                                    |             |       |      |    |    |    |        |
|----------|----------------------------------------------------------------------------------------------------------------------------------------------------------------------------------------------------------------------------------------------------|-------------|-------|------|----|----|----|--------|
| TPC1-p15 | (P42785) Lysosomal Pro-X carboxypeptidase precursor (EC 3.4.16.2) (Prolylcarboxypeptidase) (PRCP) (Proline carboxypeptidase) (Angiotensinase C) (Lysosomal carboxypeptidase C)                                                                     | PCP_HUMAN   | 55783 | 100% | 3  | 6  | 36 | 11.90% |
| TPC1-p15 | (P42892) Endothelin-converting enzyme 1 (EC 3.4.24.71) (ECE-1)                                                                                                                                                                                     | ECE1_HUMAN  | 87147 | 100% | 2  | 2  | 2  | 6.23%  |
| TPC1-p15 | (P42892) Endothelin-converting enzyme 1 (EC 3.4.24.71) (ECE-1)                                                                                                                                                                                     | ECE1_HUMAN  | 87147 | 100% | 3  | 3  | 3  | 7.14%  |
| TPC1-p15 | (P42892) Endothelin-converting enzyme 1 (EC 3.4.24.71) (ECE-1)                                                                                                                                                                                     | ECE1_HUMAN  | 87147 | 100% | 2  | 2  | 4  | 6.10%  |
| TPC1-p15 | (P43121) Cell surface glycoprotein MUC18 precursor (Melanoma-associated antigen MUC18) (Melanoma cell adhesion molecule) (Melanoma-associated antigen A32) (S-endo 1 endothelial-associated antigen) (Cell surface glycoprotein P1H12) (CD146 anti | MUC18_HUMAN | 71589 | 100% | 5  | 6  | 9  | 14.10% |
| TPC1-p15 | (P43121) Cell surface glycoprotein MUC18 precursor (Melanoma-associated antigen MUC18) (Melanoma cell adhesion molecule) (Melanoma-associated antigen A32) (S-endo 1 endothelial-associated antigen) (Cell surface glycoprotein P1H12) (CD146 anti | MUC18_HUMAN | 71589 | 100% | 6  | 6  | 10 | 14.20% |
| TPC1-p15 | (P43121) Cell surface glycoprotein MUC18 precursor (Melanoma-associated antigen MUC18) (Melanoma cell adhesion molecule) (Melanoma-associated antigen A32) (S-endo 1 endothelial-associated antigen) (Cell surface glycoprotein P1H12) (CD146 anti | MUC18_HUMAN | 71589 | 100% | 10 | 10 | 10 | 23.40% |
| TPC1-p15 | (P43121) Cell surface glycoprotein MUC18 precursor (Melanoma-associated antigen MUC18) (Melanoma cell adhesion molecule) (Melanoma-associated antigen A32) (S-endo 1 endothelial-associated antigen) (Cell surface glycoprotein P1H12) (CD146 anti | MUC18_HUMAN | 71589 | 100% | 5  | 5  | 8  | 9.91%  |
| TPC1-p15 | (P43121) Cell surface glycoprotein MUC18 precursor (Melanoma-associated antigen MUC18) (Melanoma cell adhesion molecule) (Melanoma-associated antigen A32) (S-endo 1 endothelial-associated antigen) (Cell surface glycoprotein P1H12) (CD146 anti | MUC18_HUMAN | 71589 | 100% | 2  | 2  | 3  | 8.05%  |
| TPC1-p15 | (P43121) Cell surface glycoprotein MUC18 precursor (Melanoma-associated antigen MUC18) (Melanoma cell adhesion molecule) (Melanoma-associated antigen A32) (S-endo 1 endothelial-associated antigen) (Cell surface glycoprotein P1H12) (CD146 anti | MUC18_HUMAN | 71589 | 100% | 2  | 2  | 2  | 4.80%  |

## Protein Identified Sequence Coverage in TPC-1

|          |                                                                                                                                                                                                                                                    |             |       |      |   |   |    |        |
|----------|----------------------------------------------------------------------------------------------------------------------------------------------------------------------------------------------------------------------------------------------------|-------------|-------|------|---|---|----|--------|
| TPC1-p15 | (P43121) Cell surface glycoprotein MUC18 precursor (Melanoma-associated antigen MUC18) (Melanoma cell adhesion molecule) (Melanoma-associated antigen A32) (S-endo 1 endothelial-associated antigen) (Cell surface glycoprotein P1H12) (CD146 anti | MUC18_HUMAN | 71589 | 100% | 2 | 2 | 2  | 8.67%  |
| TPC1-p15 | (P43121) Cell surface glycoprotein MUC18 precursor (Melanoma-associated antigen MUC18) (Melanoma cell adhesion molecule) (Melanoma-associated antigen A32) (S-endo 1 endothelial-associated antigen) (Cell surface glycoprotein P1H12) (CD146 anti | MUC18_HUMAN | 71589 | 100% | 5 | 5 | 7  | 13.60% |
| TPC1-p15 | (P43121) Cell surface glycoprotein MUC18 precursor (Melanoma-associated antigen MUC18) (Melanoma cell adhesion molecule) (Melanoma-associated antigen A32) (S-endo 1 endothelial-associated antigen) (Cell surface glycoprotein P1H12) (CD146 anti | MUC18_HUMAN | 71589 | 100% | 3 | 3 | 5  | 10.80% |
| TPC1-p15 | (P43121) Cell surface glycoprotein MUC18 precursor (Melanoma-associated antigen MUC18) (Melanoma cell adhesion molecule) (Melanoma-associated antigen A32) (S-endo 1 endothelial-associated antigen) (Cell surface glycoprotein P1H12) (CD146 anti | MUC18_HUMAN | 71589 | 100% | 3 | 3 | 4  | 11.50% |
| TPC1-p15 | (P43121) Cell surface glycoprotein MUC18 precursor (Melanoma-associated antigen MUC18) (Melanoma cell adhesion molecule) (Melanoma-associated antigen A32) (S-endo 1 endothelial-associated antigen) (Cell surface glycoprotein P1H12) (CD146 anti | MUC18_HUMAN | 71589 | 100% | 3 | 4 | 11 | 10.70% |
| TPC1-p15 | (P43251) Biotinidase precursor (EC 3.5.1.12)                                                                                                                                                                                                       | BTD_HUMAN   | 58896 | 100% | 2 | 2 | 3  | 5.74%  |
| TPC1-p15 | (P46778) 60S ribosomal protein L21                                                                                                                                                                                                                 | RL21_HUMAN  | 18416 | 100% | 2 | 2 | 7  | 16.40% |
| TPC1-p15 | (P46778) 60S ribosomal protein L21                                                                                                                                                                                                                 | RL21_HUMAN  | 18416 | 100% | 2 | 2 | 2  | 16.40% |
| TPC1-p15 | (P46778) 60S ribosomal protein L21                                                                                                                                                                                                                 | RL21_HUMAN  | 18416 | 100% | 2 | 3 | 7  | 16.40% |
| TPC1-p15 | (P46782) 40S ribosomal protein S5                                                                                                                                                                                                                  | RS5_HUMAN   | 22728 | 100% | 2 | 2 | 3  | 14.30% |
| TPC1-p15 | (P46976) Glycogenin-1 (EC 2.4.1.186)                                                                                                                                                                                                               | GLYG_HUMAN  | 39235 | 100% | 2 | 2 | 3  | 8.31%  |
| TPC1-p15 | (P46976) Glycogenin-1 (EC 2.4.1.186)                                                                                                                                                                                                               | GLYG_HUMAN  | 39235 | 100% | 2 | 2 | 3  | 8.31%  |
| TPC1-p15 | (P48509) CD151 antigen (Platelet-endothelial tetraspan antigen 3) (PETA-3) (GP27) (Membrane glycoprotein SFA-1) (Tetraspanin-24) (Tspan-24)                                                                                                        | CD151_HUMAN | 28277 | 100% | 2 | 2 | 3  | 7.51%  |
| TPC1-p15 | (P48509) CD151 antigen (Platelet-endothelial tetraspan antigen 3) (PETA-3) (GP27) (Membrane glycoprotein SFA-1) (Tetraspanin-24) (Tspan-24)                                                                                                        | CD151_HUMAN | 28277 | 100% | 2 | 2 | 3  | 7.51%  |
| TPC1-p15 | (P49419) Aldehyde dehydrogenase family 7 member A1 (EC 1.2.1.3) (Antiquitin-1)                                                                                                                                                                     | AL7A1_HUMAN | 55217 | 100% | 2 | 2 | 2  | 6.08%  |

## Protein Identified Sequence Coverage in TPC-1

|          |                                                                                                                                                      |             |       |      |   |    |    |        |
|----------|------------------------------------------------------------------------------------------------------------------------------------------------------|-------------|-------|------|---|----|----|--------|
| TPC1-p15 | (P50897) Palmitoyl-protein thioesterase 1 precursor (EC 3.1.2.22) (Palmitoyl-protein hydrolase 1)                                                    | PPT1_HUMAN  | 34176 | 100% | 7 | 11 | 22 | 41.50% |
| TPC1-p15 | (P50897) Palmitoyl-protein thioesterase 1 precursor (EC 3.1.2.22) (Palmitoyl-protein hydrolase 1)                                                    | PPT1_HUMAN  | 34176 | 100% | 6 | 9  | 20 | 36.90% |
| TPC1-p15 | (P50897) Palmitoyl-protein thioesterase 1 precursor (EC 3.1.2.22) (Palmitoyl-protein hydrolase 1)                                                    | PPT1_HUMAN  | 34176 | 100% | 7 | 9  | 13 | 28.10% |
| TPC1-p15 | (P50897) Palmitoyl-protein thioesterase 1 precursor (EC 3.1.2.22) (Palmitoyl-protein hydrolase 1)                                                    | PPT1_HUMAN  | 34176 | 100% | 7 | 7  | 9  | 31.40% |
| TPC1-p15 | (P50897) Palmitoyl-protein thioesterase 1 precursor (EC 3.1.2.22) (Palmitoyl-protein hydrolase 1)                                                    | PPT1_HUMAN  | 34176 | 100% | 4 | 4  | 10 | 28.10% |
| TPC1-p15 | (P50897) Palmitoyl-protein thioesterase 1 precursor (EC 3.1.2.22) (Palmitoyl-protein hydrolase 1)                                                    | PPT1_HUMAN  | 34176 | 100% | 4 | 6  | 9  | 16.00% |
| TPC1-p15 | (P50897) Palmitoyl-protein thioesterase 1 precursor (EC 3.1.2.22) (Palmitoyl-protein hydrolase 1)                                                    | PPT1_HUMAN  | 34176 | 100% | 4 | 6  | 10 | 16.00% |
| TPC1-p15 | (P50897) Palmitoyl-protein thioesterase 1 precursor (EC 3.1.2.22) (Palmitoyl-protein hydrolase 1)                                                    | PPT1_HUMAN  | 34176 | 100% | 3 | 4  | 5  | 9.80%  |
| TPC1-p15 | (P50897) Palmitoyl-protein thioesterase 1 precursor (EC 3.1.2.22) (Palmitoyl-protein hydrolase 1)                                                    | PPT1_HUMAN  | 34176 | 100% | 2 | 2  | 6  | 16.00% |
| TPC1-p15 | (P50897) Palmitoyl-protein thioesterase 1 precursor (EC 3.1.2.22) (Palmitoyl-protein hydrolase 1)                                                    | PPT1_HUMAN  | 34176 | 100% | 3 | 4  | 12 | 19.00% |
| TPC1-p15 | (P50897) Palmitoyl-protein thioesterase 1 precursor (EC 3.1.2.22) (Palmitoyl-protein hydrolase 1)                                                    | PPT1_HUMAN  | 34176 | 100% | 2 | 3  | 10 | 12.40% |
| TPC1-p15 | (P50897) Palmitoyl-protein thioesterase 1 precursor (EC 3.1.2.22) (Palmitoyl-protein hydrolase 1)                                                    | PPT1_HUMAN  | 34176 | 100% | 4 | 6  | 10 | 23.20% |
| TPC1-p15 | (P50897) Palmitoyl-protein thioesterase 1 precursor (EC 3.1.2.22) (Palmitoyl-protein hydrolase 1)                                                    | PPT1_HUMAN  | 34176 | 100% | 2 | 3  | 31 | 12.40% |
| TPC1-p15 | (P51572) B-cell receptor-associated protein 31 (BCR-associated protein Bap31) (p28 Bap31) (CDM protein) (6C6-AG tumor-associated antigen) (DXS1357E) | BAP31_HUMAN | 27843 | 100% | 2 | 2  | 3  | 7.35%  |
| TPC1-p15 | (P51572) B-cell receptor-associated protein 31 (BCR-associated protein Bap31) (p28 Bap31) (CDM protein) (6C6-AG tumor-associated antigen) (DXS1357E) | BAP31_HUMAN | 27843 | 100% | 2 | 3  | 3  | 10.20% |

## Protein Identified Sequence Coverage in TPC-1

|          |                                                                                                                                                                                                                                                   |             |        |      |   |   |   |        |
|----------|---------------------------------------------------------------------------------------------------------------------------------------------------------------------------------------------------------------------------------------------------|-------------|--------|------|---|---|---|--------|
| TPC1-p15 | (P51572) B-cell receptor-associated protein 31 (BCR-associated protein Bap31) (p28 Bap31) (CDM protein) (6C6-AG tumor-associated antigen) (DXS1357E)                                                                                              | BAP31_HUMAN | 27843  | 100% | 4 | 4 | 4 | 18.40% |
| TPC1-p15 | (P51610) Host cell factor (HCF) (HCF-1) (C1 factor) (VP16 accessory protein) (VCAF) (CFF) [Contains: HCF N-terminal chain 1; HCF N-terminal chain 2; HCF N-terminal chain 3; HCF N-terminal chain 4; HCF N-terminal chain 5; HCF N-terminal chain | HCFC1_HUMAN | 208816 | 100% | 2 | 3 | 5 | 1.62%  |
| TPC1-p15 | (P51610) Host cell factor (HCF) (HCF-1) (C1 factor) (VP16 accessory protein) (VCAF) (CFF) [Contains: HCF N-terminal chain 1; HCF N-terminal chain 2; HCF N-terminal chain 3; HCF N-terminal chain 4; HCF N-terminal chain 5; HCF N-terminal chain | HCFC1_HUMAN | 208816 | 100% | 4 | 5 | 9 | 2.95%  |
| TPC1-p15 | (P51610) Host cell factor (HCF) (HCF-1) (C1 factor) (VP16 accessory protein) (VCAF) (CFF) [Contains: HCF N-terminal chain 1; HCF N-terminal chain 2; HCF N-terminal chain 3; HCF N-terminal chain 4; HCF N-terminal chain 5; HCF N-terminal chain | HCFC1_HUMAN | 208816 | 100% | 2 | 3 | 3 | 1.47%  |
| TPC1-p15 | (P51610) Host cell factor (HCF) (HCF-1) (C1 factor) (VP16 accessory protein) (VCAF) (CFF) [Contains: HCF N-terminal chain 1; HCF N-terminal chain 2; HCF N-terminal chain 3; HCF N-terminal chain 4; HCF N-terminal chain 5; HCF N-terminal chain | HCFC1_HUMAN | 208816 | 100% | 5 | 6 | 9 | 3.49%  |
| TPC1-p15 | (P51610) Host cell factor (HCF) (HCF-1) (C1 factor) (VP16 accessory protein) (VCAF) (CFF) [Contains: HCF N-terminal chain 1; HCF N-terminal chain 2; HCF N-terminal chain 3; HCF N-terminal chain 4; HCF N-terminal chain 5; HCF N-terminal chain | HCFC1_HUMAN | 208816 | 100% | 2 | 2 | 3 | 2.60%  |
| TPC1-p15 | (P51610) Host cell factor (HCF) (HCF-1) (C1 factor) (VP16 accessory protein) (VCAF) (CFF) [Contains: HCF N-terminal chain 1; HCF N-terminal chain 2; HCF N-terminal chain 3; HCF N-terminal chain 4; HCF N-terminal chain 5; HCF N-terminal chain | HCFC1_HUMAN | 208816 | 100% | 3 | 3 | 3 | 2.56%  |
| TPC1-p15 | (P51610) Host cell factor (HCF) (HCF-1) (C1 factor) (VP16 accessory protein) (VCAF) (CFF) [Contains: HCF N-terminal chain 1; HCF N-terminal chain 2; HCF N-terminal chain 3; HCF N-terminal chain 4; HCF N-terminal chain 5; HCF N-terminal chain | HCFC1_HUMAN | 208816 | 100% | 2 | 3 | 3 | 3.14%  |
| TPC1-p15 | (P51688) N-sulphoglucosamine sulphohydrolase precursor (EC 3.10.1.1) (Sulfolglucosamine sulfamidase) (Sulphamidase)                                                                                                                               | SPHM_HUMAN  | 56678  | 100% | 6 | 6 | 6 | 23.30% |



## Protein Identified Sequence Coverage in TPC-1

|          |                                                                                                                                                                                                                                                     |             |       |      |   |   |    |        |
|----------|-----------------------------------------------------------------------------------------------------------------------------------------------------------------------------------------------------------------------------------------------------|-------------|-------|------|---|---|----|--------|
| TPC1-p15 | (P51688) N-sulphoglucosamine sulphonylhydrolase precursor (EC 3.10.1.1) (Sulphoglucosamine sulfamidase) (Sulphamidase)                                                                                                                              | SPHM_HUMAN  | 56678 | 100% | 6 | 6 | 7  | 22.30% |
| TPC1-p15 | (P51688) N-sulphoglucosamine sulphonylhydrolase precursor (EC 3.10.1.1) (Sulphoglucosamine sulfamidase) (Sulphamidase)                                                                                                                              | SPHM_HUMAN  | 56678 | 100% | 3 | 3 | 7  | 15.30% |
| TPC1-p15 | (P52815) 39S ribosomal protein L12, mitochondrial precursor (L12mt) (MRP-L12) (5c5-2)                                                                                                                                                               | RM12_HUMAN  | 21330 | 100% | 2 | 2 | 2  | 12.60% |
| TPC1-p15 | (P52815) 39S ribosomal protein L12, mitochondrial precursor (L12mt) (MRP-L12) (5c5-2)                                                                                                                                                               | RM12_HUMAN  | 21330 | 100% | 2 | 2 | 2  | 12.60% |
| TPC1-p15 | (P53367) Arfaptin-1 (ADP-ribosylation factor-interacting protein 1)                                                                                                                                                                                 | ARFP1_HUMAN | 41722 | 100% | 2 | 2 | 2  | 8.85%  |
| TPC1-p15 | (P53634) Dipeptidyl-peptidase 1 precursor (EC 3.4.14.1) (Dipeptidyl-peptidase I) (DPP-I) (DPPI) (Cathepsin C) (Cathepsin J) (Dipeptidyl transferase) [Contains: Dipeptidyl-peptidase 1 exclusion domain chain (Dipeptidyl-peptidase I exclusion dom | CATC_HUMAN  | 51824 | 100% | 8 | 9 | 14 | 32.20% |
| TPC1-p15 | (P53634) Dipeptidyl-peptidase 1 precursor (EC 3.4.14.1) (Dipeptidyl-peptidase I) (DPP-I) (DPPI) (Cathepsin C) (Cathepsin J) (Dipeptidyl transferase) [Contains: Dipeptidyl-peptidase 1 exclusion domain chain (Dipeptidyl-peptidase I exclusion dom | CATC_HUMAN  | 51824 | 100% | 6 | 8 | 15 | 20.70% |
| TPC1-p15 | (P53634) Dipeptidyl-peptidase 1 precursor (EC 3.4.14.1) (Dipeptidyl-peptidase I) (DPP-I) (DPPI) (Cathepsin C) (Cathepsin J) (Dipeptidyl transferase) [Contains: Dipeptidyl-peptidase 1 exclusion domain chain (Dipeptidyl-peptidase I exclusion dom | CATC_HUMAN  | 51824 | 100% | 6 | 7 | 8  | 20.70% |
| TPC1-p15 | (P53634) Dipeptidyl-peptidase 1 precursor (EC 3.4.14.1) (Dipeptidyl-peptidase I) (DPP-I) (DPPI) (Cathepsin C) (Cathepsin J) (Dipeptidyl transferase) [Contains: Dipeptidyl-peptidase 1 exclusion domain chain (Dipeptidyl-peptidase I exclusion dom | CATC_HUMAN  | 51824 | 100% | 4 | 4 | 7  | 14.70% |
| TPC1-p15 | (P53634) Dipeptidyl-peptidase 1 precursor (EC 3.4.14.1) (Dipeptidyl-peptidase I) (DPP-I) (DPPI) (Cathepsin C) (Cathepsin J) (Dipeptidyl transferase) [Contains: Dipeptidyl-peptidase 1 exclusion domain chain (Dipeptidyl-peptidase I exclusion dom | CATC_HUMAN  | 51824 | 100% | 4 | 4 | 13 | 20.50% |

## Protein Identified Sequence Coverage in TPC-1

|          |                                                                                                                                                                                                                                                     |            |       |      |   |   |    |        |
|----------|-----------------------------------------------------------------------------------------------------------------------------------------------------------------------------------------------------------------------------------------------------|------------|-------|------|---|---|----|--------|
| TPC1-p15 | (P53634) Dipeptidyl-peptidase 1 precursor (EC 3.4.14.1) (Dipeptidyl-peptidase I) (DPP-I) (DPPI) (Cathepsin C) (Cathepsin J) (Dipeptidyl transferase) [Contains: Dipeptidyl-peptidase 1 exclusion domain chain (Dipeptidyl-peptidase I exclusion dom | CATC_HUMAN | 51824 | 100% | 3 | 4 | 19 | 14.70% |
| TPC1-p15 | (P53634) Dipeptidyl-peptidase 1 precursor (EC 3.4.14.1) (Dipeptidyl-peptidase I) (DPP-I) (DPPI) (Cathepsin C) (Cathepsin J) (Dipeptidyl transferase) [Contains: Dipeptidyl-peptidase 1 exclusion domain chain (Dipeptidyl-peptidase I exclusion dom | CATC_HUMAN | 51824 | 100% | 2 | 3 | 18 | 6.70%  |
| TPC1-p15 | (P53634) Dipeptidyl-peptidase 1 precursor (EC 3.4.14.1) (Dipeptidyl-peptidase I) (DPP-I) (DPPI) (Cathepsin C) (Cathepsin J) (Dipeptidyl transferase) [Contains: Dipeptidyl-peptidase 1 exclusion domain chain (Dipeptidyl-peptidase I exclusion dom | CATC_HUMAN | 51824 | 100% | 2 | 2 | 19 | 6.70%  |
| TPC1-p15 | (P53634) Dipeptidyl-peptidase 1 precursor (EC 3.4.14.1) (Dipeptidyl-peptidase I) (DPP-I) (DPPI) (Cathepsin C) (Cathepsin J) (Dipeptidyl transferase) [Contains: Dipeptidyl-peptidase 1 exclusion domain chain (Dipeptidyl-peptidase I exclusion dom | CATC_HUMAN | 51824 | 100% | 2 | 2 | 7  | 12.10% |
| TPC1-p15 | (P53634) Dipeptidyl-peptidase 1 precursor (EC 3.4.14.1) (Dipeptidyl-peptidase I) (DPP-I) (DPPI) (Cathepsin C) (Cathepsin J) (Dipeptidyl transferase) [Contains: Dipeptidyl-peptidase 1 exclusion domain chain (Dipeptidyl-peptidase I exclusion dom | CATC_HUMAN | 51824 | 100% | 3 | 3 | 7  | 13.40% |
| TPC1-p15 | (P53634) Dipeptidyl-peptidase 1 precursor (EC 3.4.14.1) (Dipeptidyl-peptidase I) (DPP-I) (DPPI) (Cathepsin C) (Cathepsin J) (Dipeptidyl transferase) [Contains: Dipeptidyl-peptidase 1 exclusion domain chain (Dipeptidyl-peptidase I exclusion dom | CATC_HUMAN | 51824 | 100% | 2 | 2 | 3  | 8.86%  |
| TPC1-p15 | (P53634) Dipeptidyl-peptidase 1 precursor (EC 3.4.14.1) (Dipeptidyl-peptidase I) (DPP-I) (DPPI) (Cathepsin C) (Cathepsin J) (Dipeptidyl transferase) [Contains: Dipeptidyl-peptidase 1 exclusion domain chain (Dipeptidyl-peptidase I exclusion dom | CATC_HUMAN | 51824 | 100% | 4 | 6 | 13 | 14.00% |
| TPC1-p15 | (P53634) Dipeptidyl-peptidase 1 precursor (EC 3.4.14.1) (Dipeptidyl-peptidase I) (DPP-I) (DPPI) (Cathepsin C) (Cathepsin J) (Dipeptidyl transferase) [Contains: Dipeptidyl-peptidase 1 exclusion domain chain (Dipeptidyl-peptidase I exclusion dom | CATC_HUMAN | 51824 | 100% | 3 | 3 | 6  | 13.80% |

## Protein Identified Sequence Coverage in TPC-1

|          |                                                                                                                                                                          |             |       |      |   |   |    |        |
|----------|--------------------------------------------------------------------------------------------------------------------------------------------------------------------------|-------------|-------|------|---|---|----|--------|
| TPC1-p15 | (P54727) UV excision repair protein RAD23 homolog B (hHR23B) (XP-C repair-complementing complex 58 kDa protein) (p58)                                                    | RD23B_HUMAN | 43153 | 100% | 2 | 2 | 2  | 12.20% |
| TPC1-p15 | (P54803) Galactocerebrosidase precursor (EC 3.2.1.46) (GALCERase) (Galactosylceramidase) (Galactosylceramide beta-galactosidase) (Galactocerebroside beta-galactosidase) | GALC_HUMAN  | 75132 | 100% | 2 | 2 | 2  | 5.23%  |
| TPC1-p15 | (P54819) Adenylate kinase isoenzyme 2, mitochondrial (EC 2.7.4.3) (ATP-AMP transphosphorylase)                                                                           | KAD2_HUMAN  | 26330 | 100% | 2 | 2 | 4  | 9.66%  |
| TPC1-p15 | (P54819) Adenylate kinase isoenzyme 2, mitochondrial (EC 2.7.4.3) (ATP-AMP transphosphorylase)                                                                           | KAD2_HUMAN  | 26330 | 100% | 2 | 3 | 5  | 18.10% |
| TPC1-p15 | (P54819) Adenylate kinase isoenzyme 2, mitochondrial (EC 2.7.4.3) (ATP-AMP transphosphorylase)                                                                           | KAD2_HUMAN  | 26330 | 100% | 2 | 4 | 5  | 18.10% |
| TPC1-p15 | (P55145) ARMET protein precursor (Arginine-rich protein)                                                                                                                 | ARMET_HUMAN | 20240 | 100% | 4 | 4 | 6  | 24.60% |
| TPC1-p15 | (P55145) ARMET protein precursor (Arginine-rich protein)                                                                                                                 | ARMET_HUMAN | 20240 | 100% | 3 | 3 | 6  | 17.30% |
| TPC1-p15 | (P55145) ARMET protein precursor (Arginine-rich protein)                                                                                                                 | ARMET_HUMAN | 20240 | 100% | 5 | 5 | 5  | 26.30% |
| TPC1-p15 | (P55145) ARMET protein precursor (Arginine-rich protein)                                                                                                                 | ARMET_HUMAN | 20240 | 100% | 3 | 3 | 4  | 15.10% |
| TPC1-p15 | (P55145) ARMET protein precursor (Arginine-rich protein)                                                                                                                 | ARMET_HUMAN | 20240 | 100% | 2 | 2 | 4  | 16.20% |
| TPC1-p15 | (P55145) ARMET protein precursor (Arginine-rich protein)                                                                                                                 | ARMET_HUMAN | 20240 | 100% | 2 | 2 | 3  | 16.20% |
| TPC1-p15 | (P55327) Tumor protein D52 (N8 protein)                                                                                                                                  | TPD52_HUMAN | 19845 | 100% | 3 | 3 | 3  | 27.20% |
| TPC1-p15 | (P55327) Tumor protein D52 (N8 protein)                                                                                                                                  | TPD52_HUMAN | 19845 | 100% | 3 | 3 | 3  | 27.20% |
| TPC1-p15 | (P55327) Tumor protein D52 (N8 protein)                                                                                                                                  | TPD52_HUMAN | 19845 | 100% | 2 | 2 | 2  | 13.00% |
| TPC1-p15 | (P55327) Tumor protein D52 (N8 protein)                                                                                                                                  | TPD52_HUMAN | 19845 | 100% | 4 | 5 | 7  | 26.60% |
| TPC1-p15 | (P55327) Tumor protein D52 (N8 protein)                                                                                                                                  | TPD52_HUMAN | 19845 | 100% | 3 | 3 | 5  | 19.60% |
| TPC1-p15 | (P55327) Tumor protein D52 (N8 protein)                                                                                                                                  | TPD52_HUMAN | 19845 | 100% | 2 | 3 | 6  | 25.00% |
| TPC1-p15 | (P55327) Tumor protein D52 (N8 protein)                                                                                                                                  | TPD52_HUMAN | 19845 | 100% | 2 | 2 | 6  | 24.50% |
| TPC1-p15 | (P55327) Tumor protein D52 (N8 protein)                                                                                                                                  | TPD52_HUMAN | 19845 | 100% | 5 | 8 | 30 | 47.30% |
| TPC1-p15 | (P56159) GDNF family receptor alpha-1 precursor (GFR-alpha-1) (GDNF receptor alpha) (GDNFR-alpha) (TGF-beta-related neurotrophic factor receptor 1) (RET ligand 1)       | GFRA1_HUMAN | 51439 | 100% | 3 | 3 | 4  | 9.03%  |
| TPC1-p15 | (P56159) GDNF family receptor alpha-1 precursor (GFR-alpha-1) (GDNF receptor alpha) (GDNFR-alpha) (TGF-beta-related neurotrophic factor receptor 1) (RET ligand 1)       | GFRA1_HUMAN | 51439 | 100% | 4 | 4 | 6  | 13.80% |
| TPC1-p15 | (P56159) GDNF family receptor alpha-1 precursor (GFR-alpha-1) (GDNF receptor alpha) (GDNFR-alpha) (TGF-beta-related neurotrophic factor receptor 1) (RET ligand 1)       | GFRA1_HUMAN | 51439 | 100% | 3 | 3 | 3  | 9.46%  |

Protein Identified Sequence Coverage in TPC-1

|          |                                                                                                                                                                    |                |        |      |   |   |    |        |
|----------|--------------------------------------------------------------------------------------------------------------------------------------------------------------------|----------------|--------|------|---|---|----|--------|
| TPC1-p15 | (P56159) GDNF family receptor alpha-1 precursor (GFR-alpha-1) (GDNF receptor alpha) (GDNFR-alpha) (TGF-beta-related neurotrophic factor receptor 1) (RET ligand 1) | GFRA1_HUMAN    | 51439  | 100% | 2 | 2 | 3  | 5.59%  |
| TPC1-p15 | (P56159) GDNF family receptor alpha-1 precursor (GFR-alpha-1) (GDNF receptor alpha) (GDNFR-alpha) (TGF-beta-related neurotrophic factor receptor 1) (RET ligand 1) | GFRA1_HUMAN    | 51439  | 100% | 2 | 2 | 2  | 3.66%  |
| TPC1-p15 | (P56199) Integrin alpha-1 (Laminin and collagen receptor) (VLA-1) (CD49a antigen)                                                                                  | ITA1_HUMAN     | 127823 | 100% | 2 | 2 | 2  | 2.09%  |
| TPC1-p15 | (P56537) Eukaryotic translation initiation factor 6 (eIF6) (B4 integrin interactor) (CAB) (p27(BBP)) (B(2)GCN homolog)                                             | IF6_HUMAN      | 26580  | 100% | 2 | 2 | 2  | 17.10% |
| TPC1-p15 | (P60033) CD81 antigen (26 kDa cell surface protein TAPA-1) (Target of the antiproliferative antibody 1) (Tetraspanin-28) (Tspan-28)                                | CD81_HUMAN     | 25792  | 100% | 2 | 2 | 3  | 16.50% |
| TPC1-p15 | (P60033) CD81 antigen (26 kDa cell surface protein TAPA-1) (Target of the antiproliferative antibody 1) (Tetraspanin-28) (Tspan-28)                                | CD81_HUMAN     | 25792  | 100% | 2 | 2 | 3  | 16.50% |
| TPC1-p15 | (P60709) Actin, cytoplasmic 1 (Beta-actin)                                                                                                                         | ACTB_HUMAN,ACT | 41776  | 100% | 4 | 4 | 6  | 19.70% |
| TPC1-p15 | (P60709) Actin, cytoplasmic 1 (Beta-actin)                                                                                                                         | ACTB_HUMAN,ACT | 41720  | 100% | 5 | 5 | 9  | 23.20% |
| TPC1-p15 | (P60709) Actin, cytoplasmic 1 (Beta-actin)                                                                                                                         | ACTB_HUMAN,ACT | 41776  | 100% | 3 | 3 | 3  | 15.20% |
| TPC1-p15 | (P60709) Actin, cytoplasmic 1 (Beta-actin)                                                                                                                         | ACTB_HUMAN,ACT | 41776  | 100% | 4 | 4 | 8  | 13.30% |
| TPC1-p15 | (P60709) Actin, cytoplasmic 1 (Beta-actin)                                                                                                                         | ACTB_HUMAN,ACT | 41776  | 100% | 5 | 5 | 5  | 18.90% |
| TPC1-p15 | (P60866) 40S ribosomal protein S20                                                                                                                                 | RS20_HUMAN     | 13355  | 100% | 2 | 3 | 3  | 19.30% |
| TPC1-p15 | (P61106) Ras-related protein Rab-14                                                                                                                                | RAB14_HUMAN    | 23748  | 100% | 2 | 2 | 2  | 13.10% |
| TPC1-p15 | (P61247) 40S ribosomal protein S3a                                                                                                                                 | RS3A_HUMAN     | 29796  | 100% | 2 | 2 | 3  | 9.51%  |
| TPC1-p15 | (P61604) 10 kDa heat shock protein, mitochondrial (Hsp10) (10 kDa chaperonin) (CPN10) (Early-pregnancy factor) (EPF)                                               | CH10_HUMAN     | 10783  | 100% | 2 | 3 | 3  | 37.60% |
| TPC1-p15 | (P61604) 10 kDa heat shock protein, mitochondrial (Hsp10) (10 kDa chaperonin) (CPN10) (Early-pregnancy factor) (EPF)                                               | CH10_HUMAN     | 10783  | 100% | 2 | 3 | 3  | 37.60% |
| TPC1-p15 | (P61803) Defender against cell death 1 (DAD-1)                                                                                                                     | DAD1_HUMAN     | 12348  | 100% | 2 | 2 | 3  | 19.60% |
| TPC1-p15 | (P61916) Epididymal secretory protein E1 precursor (Niemann-Pick disease type C2 protein) (hE1)                                                                    | NPC2_HUMAN     | 16552  | 100% | 6 | 8 | 30 | 57.00% |
| TPC1-p15 | (P61916) Epididymal secretory protein E1 precursor (Niemann-Pick disease type C2 protein) (hE1)                                                                    | NPC2_HUMAN     | 16552  | 100% | 5 | 6 | 18 | 51.00% |
| TPC1-p15 | (P61916) Epididymal secretory protein E1 precursor (Niemann-Pick disease type C2 protein) (hE1)                                                                    | NPC2_HUMAN     | 16552  | 100% | 6 | 8 | 19 | 55.60% |
| TPC1-p15 | (P61916) Epididymal secretory protein E1 precursor (Niemann-Pick disease type C2 protein) (hE1)                                                                    | NPC2_HUMAN     | 16552  | 100% | 6 | 7 | 20 | 51.70% |
| TPC1-p15 | (P61916) Epididymal secretory protein E1 precursor (Niemann-Pick disease type C2 protein) (hE1)                                                                    | NPC2_HUMAN     | 16552  | 100% | 2 | 2 | 6  | 26.50% |

## Protein Identified Sequence Coverage in TPC-1

|          |                                                                                                 |            |       |      |   |    |    |        |
|----------|-------------------------------------------------------------------------------------------------|------------|-------|------|---|----|----|--------|
| TPC1-p15 | (P61916) Epididymal secretory protein E1 precursor (Niemann-Pick disease type C2 protein) (hE1) | NPC2_HUMAN | 16552 | 100% | 4 | 4  | 53 | 43.70% |
| TPC1-p15 | (P61916) Epididymal secretory protein E1 precursor (Niemann-Pick disease type C2 protein) (hE1) | NPC2_HUMAN | 16552 | 100% | 4 | 4  | 46 | 43.70% |
| TPC1-p15 | (P61916) Epididymal secretory protein E1 precursor (Niemann-Pick disease type C2 protein) (hE1) | NPC2_HUMAN | 16552 | 100% | 5 | 5  | 70 | 43.70% |
| TPC1-p15 | (P61916) Epididymal secretory protein E1 precursor (Niemann-Pick disease type C2 protein) (hE1) | NPC2_HUMAN | 16552 | 100% | 2 | 2  | 3  | 32.50% |
| TPC1-p15 | (P61916) Epididymal secretory protein E1 precursor (Niemann-Pick disease type C2 protein) (hE1) | NPC2_HUMAN | 16552 | 100% | 4 | 5  | 14 | 30.50% |
| TPC1-p15 | (P61916) Epididymal secretory protein E1 precursor (Niemann-Pick disease type C2 protein) (hE1) | NPC2_HUMAN | 16552 | 100% | 3 | 3  | 15 | 29.10% |
| TPC1-p15 | (P61916) Epididymal secretory protein E1 precursor (Niemann-Pick disease type C2 protein) (hE1) | NPC2_HUMAN | 16552 | 100% | 2 | 3  | 13 | 26.50% |
| TPC1-p15 | (P62081) 40S ribosomal protein S7                                                               | RS7_HUMAN  | 22110 | 100% | 3 | 3  | 4  | 30.90% |
| TPC1-p15 | (P62081) 40S ribosomal protein S7                                                               | RS7_HUMAN  | 22110 | 100% | 2 | 3  | 9  | 26.80% |
| TPC1-p15 | (P62081) 40S ribosomal protein S7                                                               | RS7_HUMAN  | 22110 | 100% | 2 | 2  | 8  | 26.80% |
| TPC1-p15 | (P62277) 40S ribosomal protein S13                                                              | RS13_HUMAN | 17074 | 100% | 3 | 3  | 5  | 24.70% |
| TPC1-p15 | (P62277) 40S ribosomal protein S13                                                              | RS13_HUMAN | 17074 | 100% | 4 | 4  | 7  | 32.70% |
| TPC1-p15 | (P62277) 40S ribosomal protein S13                                                              | RS13_HUMAN | 17074 | 100% | 3 | 4  | 4  | 26.00% |
| TPC1-p15 | (P62277) 40S ribosomal protein S13                                                              | RS13_HUMAN | 17074 | 100% | 3 | 3  | 5  | 24.70% |
| TPC1-p15 | (P62424) 60S ribosomal protein L7a (Surfeit locus protein 3) (PLA-X polypeptide)                | RL7A_HUMAN | 29847 | 100% | 5 | 6  | 11 | 22.30% |
| TPC1-p15 | (P62424) 60S ribosomal protein L7a (Surfeit locus protein 3) (PLA-X polypeptide)                | RL7A_HUMAN | 29847 | 100% | 6 | 7  | 9  | 25.30% |
| TPC1-p15 | (P62424) 60S ribosomal protein L7a (Surfeit locus protein 3) (PLA-X polypeptide)                | RL7A_HUMAN | 29847 | 100% | 4 | 4  | 5  | 18.90% |
| TPC1-p15 | (P62424) 60S ribosomal protein L7a (Surfeit locus protein 3) (PLA-X polypeptide)                | RL7A_HUMAN | 29847 | 100% | 6 | 6  | 10 | 22.30% |
| TPC1-p15 | (P62424) 60S ribosomal protein L7a (Surfeit locus protein 3) (PLA-X polypeptide)                | RL7A_HUMAN | 29847 | 100% | 2 | 3  | 4  | 12.80% |
| TPC1-p15 | (P62805) Histone H4                                                                             | H4_HUMAN   | 11219 | 100% | 8 | 11 | 73 | 53.90% |
| TPC1-p15 | (P62805) Histone H4                                                                             | H4_HUMAN   | 11219 | 100% | 7 | 9  | 64 | 52.90% |
| TPC1-p15 | (P62805) Histone H4                                                                             | H4_HUMAN   | 11219 | 100% | 7 | 9  | 52 | 52.90% |
| TPC1-p15 | (P62805) Histone H4                                                                             | H4_HUMAN   | 11219 | 100% | 7 | 7  | 68 | 46.10% |
| TPC1-p15 | (P62805) Histone H4                                                                             | H4_HUMAN   | 11219 | 100% | 8 | 8  | 16 | 53.90% |
| TPC1-p15 | (P62805) Histone H4                                                                             | H4_HUMAN   | 11219 | 100% | 5 | 5  | 9  | 52.00% |
| TPC1-p15 | (P62805) Histone H4                                                                             | H4_HUMAN   | 11219 | 100% | 6 | 6  | 14 | 52.00% |
| TPC1-p15 | (P62805) Histone H4                                                                             | H4_HUMAN   | 11219 | 100% | 3 | 3  | 17 | 29.40% |
| TPC1-p15 | (P62805) Histone H4                                                                             | H4_HUMAN   | 11219 | 100% | 4 | 4  | 33 | 39.20% |
| TPC1-p15 | (P62805) Histone H4                                                                             | H4_HUMAN   | 11219 | 100% | 4 | 6  | 39 | 44.10% |
| TPC1-p15 | (P62805) Histone H4                                                                             | H4_HUMAN   | 11219 | 100% | 2 | 4  | 13 | 24.50% |

## Protein Identified Sequence Coverage in TPC-1

|          |                                                                                                                                     |                |       |      |   |   |     |        |
|----------|-------------------------------------------------------------------------------------------------------------------------------------|----------------|-------|------|---|---|-----|--------|
| TPC1-p15 | (P62807) Histone H2B.a/g/h/k/l (H2B.1 A) (H2B/a) (H2B/g) (H2B/h) (H2B/k) (H2B/l)                                                    | H2BA_HUMAN,H2B | 13743 | 100% | 4 | 5 | 67  | 32.80% |
| TPC1-p15 | (P62807) Histone H2B.a/g/h/k/l (H2B.1 A) (H2B/a) (H2B/g) (H2B/h) (H2B/k) (H2B/l)                                                    | H2BA_HUMAN,H2B | 13795 | 100% | 4 | 5 | 49  | 36.00% |
| TPC1-p15 | (P62807) Histone H2B.a/g/h/k/l (H2B.1 A) (H2B/a) (H2B/g) (H2B/h) (H2B/k) (H2B/l)                                                    | H2BA_HUMAN,H2B | 13795 | 100% | 4 | 5 | 38  | 32.80% |
| TPC1-p15 | (P62807) Histone H2B.a/g/h/k/l (H2B.1 A) (H2B/a) (H2B/g) (H2B/h) (H2B/k) (H2B/l)                                                    | H2BA_HUMAN,H2B | 13795 | 100% | 3 | 4 | 72  | 28.80% |
| TPC1-p15 | (P62807) Histone H2B.a/g/h/k/l (H2B.1 A) (H2B/a) (H2B/g) (H2B/h) (H2B/k) (H2B/l)                                                    | H2BA_HUMAN,H2B | 13795 | 100% | 4 | 4 | 19  | 38.40% |
| TPC1-p15 | (P62807) Histone H2B.a/g/h/k/l (H2B.1 A) (H2B/a) (H2B/g) (H2B/h) (H2B/k) (H2B/l)                                                    | H2BA_HUMAN,H2B | 13795 | 100% | 3 | 3 | 15  | 30.40% |
| TPC1-p15 | (P62807) Histone H2B.a/g/h/k/l (H2B.1 A) (H2B/a) (H2B/g) (H2B/h) (H2B/k) (H2B/l)                                                    | H2BA_HUMAN,H2B | 13841 | 100% | 3 | 3 | 18  | 31.20% |
| TPC1-p15 | (P62807) Histone H2B.a/g/h/k/l (H2B.1 A) (H2B/a) (H2B/g) (H2B/h) (H2B/k) (H2B/l)                                                    | H2BA_HUMAN,H2B | 13795 | 100% | 4 | 4 | 69  | 35.20% |
| TPC1-p15 | (P62807) Histone H2B.a/g/h/k/l (H2B.1 A) (H2B/a) (H2B/g) (H2B/h) (H2B/k) (H2B/l)                                                    | H2BA_HUMAN,H2B | 13795 | 100% | 2 | 3 | 247 | 19.20% |
| TPC1-p15 | (P62807) Histone H2B.a/g/h/k/l (H2B.1 A) (H2B/a) (H2B/g) (H2B/h) (H2B/k) (H2B/l)                                                    | H2BA_HUMAN,H2B | 13795 | 100% | 2 | 3 | 61  | 19.20% |
| TPC1-p15 | (P62847) 40S ribosomal protein S24                                                                                                  | RS24_HUMAN     | 15406 | 100% | 3 | 3 | 4   | 29.30% |
| TPC1-p15 | (P62847) 40S ribosomal protein S24                                                                                                  | RS24_HUMAN     | 15406 | 100% | 2 | 2 | 2   | 20.30% |
| TPC1-p15 | (P62854) 40S ribosomal protein S26                                                                                                  | RS26_HUMAN     | 12866 | 100% | 2 | 3 | 5   | 23.70% |
| TPC1-p15 | (P62854) 40S ribosomal protein S26                                                                                                  | RS26_HUMAN     | 12866 | 100% | 3 | 4 | 6   | 31.60% |
| TPC1-p15 | (P62854) 40S ribosomal protein S26                                                                                                  | RS26_HUMAN     | 12866 | 100% | 2 | 2 | 2   | 18.40% |
| TPC1-p15 | (P62854) 40S ribosomal protein S26                                                                                                  | RS26_HUMAN     | 12866 | 100% | 2 | 2 | 4   | 23.70% |
| TPC1-p15 | (P62854) 40S ribosomal protein S26                                                                                                  | RS26_HUMAN     | 12866 | 100% | 2 | 2 | 18  | 21.10% |
| TPC1-p15 | (P62888) 60S ribosomal protein L30                                                                                                  | RL30_HUMAN     | 12636 | 100% | 3 | 3 | 5   | 35.10% |
| TPC1-p15 | (P62906) 60S ribosomal protein L10a (CSA-19)                                                                                        | RL10A_HUMAN    | 24683 | 100% | 2 | 2 | 3   | 9.72%  |
| TPC1-p15 | (P62937) Peptidyl-prolyl cis-trans isomerase A (EC 5.2.1.8) (PPIase A) (Rotamase A) (Cyclophilin A) (Cyclosporin A-binding protein) | PPIA_HUMAN     | 17864 | 100% | 2 | 2 | 4   | 27.40% |
| TPC1-p15 | (P62937) Peptidyl-prolyl cis-trans isomerase A (EC 5.2.1.8) (PPIase A) (Rotamase A) (Cyclophilin A) (Cyclosporin A-binding protein) | PPIA_HUMAN     | 17864 | 100% | 3 | 3 | 6   | 20.10% |
| TPC1-p15 | (P62937) Peptidyl-prolyl cis-trans isomerase A (EC 5.2.1.8) (PPIase A) (Rotamase A) (Cyclophilin A) (Cyclosporin A-binding protein) | PPIA_HUMAN     | 17864 | 100% | 2 | 2 | 2   | 12.80% |
| TPC1-p15 | (P62988) Ubiquitin                                                                                                                  | UBIQ_HUMAN     | 8547  | 100% | 2 | 2 | 4   | 32.90% |
| TPC1-p15 | (P62988) Ubiquitin                                                                                                                  | UBIQ_HUMAN     | 8547  | 100% | 4 | 4 | 6   | 61.80% |
| TPC1-p15 | (P62988) Ubiquitin                                                                                                                  | UBIQ_HUMAN     | 8547  | 100% | 4 | 4 | 5   | 61.80% |
| TPC1-p15 | (P62988) Ubiquitin                                                                                                                  | UBIQ_HUMAN     | 8547  | 100% | 3 | 3 | 4   | 44.70% |
| TPC1-p15 | (P62988) Ubiquitin                                                                                                                  | UBIQ_HUMAN     | 8547  | 100% | 2 | 2 | 4   | 32.90% |
| TPC1-p15 | (P62988) Ubiquitin                                                                                                                  | UBIQ_HUMAN     | 8547  | 100% | 2 | 2 | 3   | 32.90% |
| TPC1-p15 | (P62988) Ubiquitin                                                                                                                  | UBIQ_HUMAN     | 8547  | 100% | 2 | 2 | 3   | 32.90% |
| TPC1-p15 | (P67936) Tropomyosin alpha-4 chain (Tropomyosin-4) (TM30p1)                                                                         | TPM4_HUMAN     | 28373 | 100% | 3 | 3 | 3   | 12.60% |
| TPC1-p15 | (P67936) Tropomyosin alpha-4 chain (Tropomyosin-4) (TM30p1)                                                                         | TPM4_HUMAN     | 28373 | 100% | 5 | 5 | 6   | 15.00% |

## Protein Identified Sequence Coverage in TPC-1

|          |                                                                                                                        |             |       |      |   |    |    |        |
|----------|------------------------------------------------------------------------------------------------------------------------|-------------|-------|------|---|----|----|--------|
| TPC1-p15 | (P68104) Elongation factor 1-alpha 1 (EF-1-alpha-1) (Elongation factor 1 A-1) (eEF1A-1) (Elongation factor Tu) (EF-Tu) | EF1A1_HUMAN | 50123 | 100% | 7 | 10 | 15 | 21.90% |
| TPC1-p15 | (P68104) Elongation factor 1-alpha 1 (EF-1-alpha-1) (Elongation factor 1 A-1) (eEF1A-1) (Elongation factor Tu) (EF-Tu) | EF1A1_HUMAN | 50123 | 100% | 8 | 9  | 16 | 33.80% |
| TPC1-p15 | (P68104) Elongation factor 1-alpha 1 (EF-1-alpha-1) (Elongation factor 1 A-1) (eEF1A-1) (Elongation factor Tu) (EF-Tu) | EF1A1_HUMAN | 50123 | 100% | 7 | 8  | 10 | 24.50% |
| TPC1-p15 | (P68104) Elongation factor 1-alpha 1 (EF-1-alpha-1) (Elongation factor 1 A-1) (eEF1A-1) (Elongation factor Tu) (EF-Tu) | EF1A1_HUMAN | 50123 | 100% | 5 | 5  | 9  | 16.00% |
| TPC1-p15 | (P68104) Elongation factor 1-alpha 1 (EF-1-alpha-1) (Elongation factor 1 A-1) (eEF1A-1) (Elongation factor Tu) (EF-Tu) | EF1A1_HUMAN | 50123 | 100% | 4 | 4  | 6  | 30.70% |
| TPC1-p15 | (P68104) Elongation factor 1-alpha 1 (EF-1-alpha-1) (Elongation factor 1 A-1) (eEF1A-1) (Elongation factor Tu) (EF-Tu) | EF1A1_HUMAN | 50123 | 100% | 2 | 3  | 13 | 8.66%  |
| TPC1-p15 | (P68104) Elongation factor 1-alpha 1 (EF-1-alpha-1) (Elongation factor 1 A-1) (eEF1A-1) (Elongation factor Tu) (EF-Tu) | EF1A1_HUMAN | 50123 | 100% | 3 | 4  | 17 | 21.60% |
| TPC1-p15 | (P68104) Elongation factor 1-alpha 1 (EF-1-alpha-1) (Elongation factor 1 A-1) (eEF1A-1) (Elongation factor Tu) (EF-Tu) | EF1A1_HUMAN | 50123 | 100% | 3 | 3  | 11 | 15.60% |
| TPC1-p15 | (P68104) Elongation factor 1-alpha 1 (EF-1-alpha-1) (Elongation factor 1 A-1) (eEF1A-1) (Elongation factor Tu) (EF-Tu) | EF1A1_HUMAN | 50123 | 100% | 2 | 2  | 4  | 13.00% |
| TPC1-p15 | (P68104) Elongation factor 1-alpha 1 (EF-1-alpha-1) (Elongation factor 1 A-1) (eEF1A-1) (Elongation factor Tu) (EF-Tu) | EF1A1_HUMAN | 50123 | 100% | 2 | 4  | 65 | 11.30% |
| TPC1-p15 | (P68104) Elongation factor 1-alpha 1 (EF-1-alpha-1) (Elongation factor 1 A-1) (eEF1A-1) (Elongation factor Tu) (EF-Tu) | EF1A1_HUMAN | 50123 | 100% | 3 | 4  | 10 | 21.60% |
| TPC1-p15 | (P68431) Histone H3.1 (H3/a) (H3/b) (H3/c) (H3/d) (H3/f) (H3/h) (H3/i) (H3/j) (H3/k) (H3/l)                            | H31_HUMAN   | 15256 | 100% | 2 | 2  | 15 | 28.90% |
| TPC1-p15 | (P68431) Histone H3.1 (H3/a) (H3/b) (H3/c) (H3/d) (H3/f) (H3/h) (H3/i) (H3/j) (H3/k) (H3/l)                            | H31_HUMAN   | 15256 | 100% | 2 | 2  | 19 | 28.90% |
| TPC1-p15 | (P68431) Histone H3.1 (H3/a) (H3/b) (H3/c) (H3/d) (H3/f) (H3/h) (H3/i) (H3/j) (H3/k) (H3/l)                            | H31_HUMAN   | 15256 | 100% | 3 | 3  | 13 | 34.10% |
| TPC1-p15 | (P68431) Histone H3.1 (H3/a) (H3/b) (H3/c) (H3/d) (H3/f) (H3/h) (H3/i) (H3/j) (H3/k) (H3/l)                            | H31_HUMAN   | 15256 | 100% | 3 | 3  | 6  | 37.00% |
| TPC1-p15 | (P68431) Histone H3.1 (H3/a) (H3/b) (H3/c) (H3/d) (H3/f) (H3/h) (H3/i) (H3/j) (H3/k) (H3/l)                            | H31_HUMAN   | 15256 | 100% | 2 | 2  | 6  | 28.90% |
| TPC1-p15 | (P68431) Histone H3.1 (H3/a) (H3/b) (H3/c) (H3/d) (H3/f) (H3/h) (H3/i) (H3/j) (H3/k) (H3/l)                            | H31_HUMAN   | 15256 | 100% | 2 | 2  | 3  | 10.40% |
| TPC1-p15 | (P68431) Histone H3.1 (H3/a) (H3/b) (H3/c) (H3/d) (H3/f) (H3/h) (H3/i) (H3/j) (H3/k) (H3/l)                            | H31_HUMAN   | 15256 | 100% | 2 | 2  | 7  | 10.40% |
| TPC1-p15 | (P68431) Histone H3.1 (H3/a) (H3/b) (H3/c) (H3/d) (H3/f) (H3/h) (H3/i) (H3/j) (H3/k) (H3/l)                            | H31_HUMAN   | 15256 | 100% | 2 | 3  | 42 | 24.40% |

## Protein Identified Sequence Coverage in TPC-1

|          |                                                                                                                                                                                                                                                    |             |       |      |   |   |    |        |
|----------|----------------------------------------------------------------------------------------------------------------------------------------------------------------------------------------------------------------------------------------------------|-------------|-------|------|---|---|----|--------|
| TPC1-p15 | (P68431) Histone H3.1 (H3/a) (H3/b) (H3/c) (H3/d) (H3/f) (H3/h) (H3/i) (H3/j) (H3/k) (H3/l)                                                                                                                                                        | H31_HUMAN   | 15256 | 100% | 2 | 2 | 8  | 28.90% |
| TPC1-p15 | (P68431) Histone H3.1 (H3/a) (H3/b) (H3/c) (H3/d) (H3/f) (H3/h) (H3/i) (H3/j) (H3/k) (H3/l)                                                                                                                                                        | H31_HUMAN   | 15256 | 100% | 2 | 2 | 4  | 36.30% |
| TPC1-p15 | (P68431) Histone H3.1 (H3/a) (H3/b) (H3/c) (H3/d) (H3/f) (H3/h) (H3/i) (H3/j) (H3/k) (H3/l)                                                                                                                                                        | H31_HUMAN   | 15256 | 100% | 2 | 3 | 83 | 24.40% |
| TPC1-p15 | (P68431) Histone H3.1 (H3/a) (H3/b) (H3/c) (H3/d) (H3/f) (H3/h) (H3/i) (H3/j) (H3/k) (H3/l)                                                                                                                                                        | H31_HUMAN   | 15256 | 100% | 2 | 3 | 37 | 24.40% |
| TPC1-p15 | (P78324) Tyrosine-protein phosphatase non-receptor type substrate 1 precursor (SHP substrate 1) (SHPS-1) (Inhibitory receptor SHPS-1) (Signal-regulatory protein alpha-1) (Sirp-alpha-1) (Sirp-alpha-2) (Sirp-alpha-3) (MyD-1 antigen) (Brain Ig-I | SHPS1_HUMAN | 54793 | 100% | 2 | 2 | 3  | 4.37%  |
| TPC1-p15 | (P78324) Tyrosine-protein phosphatase non-receptor type substrate 1 precursor (SHP substrate 1) (SHPS-1) (Inhibitory receptor SHPS-1) (Signal-regulatory protein alpha-1) (Sirp-alpha-1) (Sirp-alpha-2) (Sirp-alpha-3) (MyD-1 antigen) (Brain Ig-I | SHPS1_HUMAN | 54793 | 100% | 2 | 2 | 4  | 4.37%  |
| TPC1-p15 | (P78324) Tyrosine-protein phosphatase non-receptor type substrate 1 precursor (SHP substrate 1) (SHPS-1) (Inhibitory receptor SHPS-1) (Signal-regulatory protein alpha-1) (Sirp-alpha-1) (Sirp-alpha-2) (Sirp-alpha-3) (MyD-1 antigen) (Brain Ig-I | SHPS1_HUMAN | 54793 | 100% | 2 | 2 | 3  | 6.16%  |
| TPC1-p15 | (P80723) Brain acid soluble protein 1 (BASP1 protein) (Neuronal axonal membrane protein NAP-22) (22 kDa neuronal tissue-enriched acidic protein)                                                                                                   | BASP_HUMAN  | 22544 | 100% | 2 | 2 | 2  | 23.00% |
| TPC1-p15 | (P80723) Brain acid soluble protein 1 (BASP1 protein) (Neuronal axonal membrane protein NAP-22) (22 kDa neuronal tissue-enriched acidic protein)                                                                                                   | BASP_HUMAN  | 22544 | 100% | 2 | 2 | 2  | 16.80% |
| TPC1-p15 | (P80723) Brain acid soluble protein 1 (BASP1 protein) (Neuronal axonal membrane protein NAP-22) (22 kDa neuronal tissue-enriched acidic protein)                                                                                                   | BASP_HUMAN  | 22544 | 100% | 2 | 2 | 3  | 23.00% |
| TPC1-p15 | (Q00765) Receptor expression-enhancing protein 5 (Polyposis locus protein 1) (TB2 protein)                                                                                                                                                         | REEP5_HUMAN | 21477 | 100% | 2 | 2 | 3  | 10.60% |
| TPC1-p15 | (Q01105) Protein SET (Phosphatase 2A inhibitor I2PP2A) (I-2PP2A) (Template-activating factor I) (TAF-I) (HLA-DR-associated protein II) (PHAPII) (Inhibitor of granzyme A-activated DNase) (IGAAD)                                                  | SET_HUMAN   | 33471 | 100% | 3 | 3 | 5  | 19.70% |



## Protein Identified Sequence Coverage in TPC-1

|          |                                                                                                                                                                                                                 |             |       |      |   |   |   |        |
|----------|-----------------------------------------------------------------------------------------------------------------------------------------------------------------------------------------------------------------|-------------|-------|------|---|---|---|--------|
| TPC1-p15 | (Q01105) Protein SET (Phosphatase 2A inhibitor I2PP2A) (I-2PP2A) (Template-activating factor I) (TAF-I) (HLA-DR-associated protein II) (PHAPII) (Inhibitor of granzyme A-activated DNase) (IGAAD)               | SET_HUMAN   | 33471 | 100% | 3 | 3 | 6 | 13.10% |
| TPC1-p15 | (Q01105) Protein SET (Phosphatase 2A inhibitor I2PP2A) (I-2PP2A) (Template-activating factor I) (TAF-I) (HLA-DR-associated protein II) (PHAPII) (Inhibitor of granzyme A-activated DNase) (IGAAD)               | SET_HUMAN   | 33471 | 100% | 4 | 4 | 6 | 16.60% |
| TPC1-p15 | (Q01105) Protein SET (Phosphatase 2A inhibitor I2PP2A) (I-2PP2A) (Template-activating factor I) (TAF-I) (HLA-DR-associated protein II) (PHAPII) (Inhibitor of granzyme A-activated DNase) (IGAAD)               | SET_HUMAN   | 33471 | 100% | 2 | 2 | 2 | 8.62%  |
| TPC1-p15 | (Q01105) Protein SET (Phosphatase 2A inhibitor I2PP2A) (I-2PP2A) (Template-activating factor I) (TAF-I) (HLA-DR-associated protein II) (PHAPII) (Inhibitor of granzyme A-activated DNase) (IGAAD)               | SET_HUMAN   | 33471 | 100% | 2 | 2 | 4 | 8.28%  |
| TPC1-p15 | (Q01459) Di-N-acetylchitobiase precursor (EC 3.2.1.-)                                                                                                                                                           | DIAC_HUMAN  | 43743 | 100% | 3 | 3 | 6 | 12.20% |
| TPC1-p15 | (Q01459) Di-N-acetylchitobiase precursor (EC 3.2.1.-)                                                                                                                                                           | DIAC_HUMAN  | 43743 | 100% | 3 | 3 | 3 | 12.70% |
| TPC1-p15 | (Q01459) Di-N-acetylchitobiase precursor (EC 3.2.1.-)                                                                                                                                                           | DIAC_HUMAN  | 43743 | 100% | 2 | 2 | 2 | 9.09%  |
| TPC1-p15 | (Q01459) Di-N-acetylchitobiase precursor (EC 3.2.1.-)                                                                                                                                                           | DIAC_HUMAN  | 43743 | 100% | 3 | 3 | 5 | 12.50% |
| TPC1-p15 | (Q01459) Di-N-acetylchitobiase precursor (EC 3.2.1.-)                                                                                                                                                           | DIAC_HUMAN  | 43743 | 100% | 2 | 2 | 3 | 10.10% |
| TPC1-p15 | (Q01459) Di-N-acetylchitobiase precursor (EC 3.2.1.-)                                                                                                                                                           | DIAC_HUMAN  | 43743 | 100% | 2 | 2 | 2 | 11.70% |
| TPC1-p15 | (Q01459) Di-N-acetylchitobiase precursor (EC 3.2.1.-)                                                                                                                                                           | DIAC_HUMAN  | 43743 | 100% | 3 | 3 | 4 | 15.80% |
| TPC1-p15 | (Q01459) Di-N-acetylchitobiase precursor (EC 3.2.1.-)                                                                                                                                                           | DIAC_HUMAN  | 43743 | 100% | 3 | 3 | 3 | 15.30% |
| TPC1-p15 | (Q01518) Adenylyl cyclase-associated protein 1 (CAP 1)                                                                                                                                                          | CAP1_HUMAN  | 51524 | 100% | 2 | 2 | 2 | 6.54%  |
| TPC1-p15 | (Q01518) Adenylyl cyclase-associated protein 1 (CAP 1)                                                                                                                                                          | CAP1_HUMAN  | 51524 | 100% | 2 | 3 | 6 | 8.65%  |
| TPC1-p15 | (Q02790) FK506-binding protein 4 (EC 5.2.1.8) (Peptidyl-prolyl cis-trans isomerase) (PPIase) (Rotamase) (p59 protein) (HSP-binding immunophilin) (HBI) (FKBP52 protein) (52 kDa FK506-binding protein) (FKBP59) | FKBP4_HUMAN | 51657 | 100% | 2 | 2 | 2 | 6.99%  |
| TPC1-p15 | (Q02809) Procollagen-lysine,2-oxoglutarate 5-dioxygenase 1 precursor (EC 1.14.11.4) (Lysyl hydroxylase 1) (LH1)                                                                                                 | PLOD1_HUMAN | 83535 | 100% | 2 | 2 | 3 | 4.26%  |

## Protein Identified Sequence Coverage in TPC-1

|          |                                                                                                                                                                                                                                                     |             |       |      |   |   |    |        |
|----------|-----------------------------------------------------------------------------------------------------------------------------------------------------------------------------------------------------------------------------------------------------|-------------|-------|------|---|---|----|--------|
| TPC1-p15 | (Q02809) Procollagen-lysine,2-oxoglutarate 5-dioxygenase 1 precursor (EC 1.14.11.4) (Lysyl hydroxylase 1) (LH1)                                                                                                                                     | PLOD1_HUMAN | 83535 | 100% | 2 | 2 | 3  | 4.68%  |
| TPC1-p15 | (Q02809) Procollagen-lysine,2-oxoglutarate 5-dioxygenase 1 precursor (EC 1.14.11.4) (Lysyl hydroxylase 1) (LH1)                                                                                                                                     | PLOD1_HUMAN | 83535 | 100% | 3 | 4 | 4  | 6.33%  |
| TPC1-p15 | (Q02878) 60S ribosomal protein L6 (TAX-responsive enhancer element-binding protein 107) (TAXREB107) (Neoplasm-related protein C140)                                                                                                                 | RL6_HUMAN   | 32580 | 100% | 3 | 3 | 5  | 9.41%  |
| TPC1-p15 | (Q02878) 60S ribosomal protein L6 (TAX-responsive enhancer element-binding protein 107) (TAXREB107) (Neoplasm-related protein C140)                                                                                                                 | RL6_HUMAN   | 32580 | 100% | 6 | 6 | 8  | 23.70% |
| TPC1-p15 | (Q02878) 60S ribosomal protein L6 (TAX-responsive enhancer element-binding protein 107) (TAXREB107) (Neoplasm-related protein C140)                                                                                                                 | RL6_HUMAN   | 32580 | 100% | 2 | 2 | 2  | 8.01%  |
| TPC1-p15 | (Q02878) 60S ribosomal protein L6 (TAX-responsive enhancer element-binding protein 107) (TAXREB107) (Neoplasm-related protein C140)                                                                                                                 | RL6_HUMAN   | 32580 | 100% | 3 | 3 | 5  | 11.80% |
| TPC1-p15 | (Q02878) 60S ribosomal protein L6 (TAX-responsive enhancer element-binding protein 107) (TAXREB107) (Neoplasm-related protein C140)                                                                                                                 | RL6_HUMAN   | 32580 | 100% | 2 | 2 | 3  | 8.71%  |
| TPC1-p15 | (Q02878) 60S ribosomal protein L6 (TAX-responsive enhancer element-binding protein 107) (TAXREB107) (Neoplasm-related protein C140)                                                                                                                 | RL6_HUMAN   | 32580 | 100% | 2 | 2 | 2  | 11.10% |
| TPC1-p15 | (Q06323) Proteasome activator complex subunit 1 (Proteasome activator 28-alpha subunit) (PA28alpha) (PA28a) (Activator of multicatalytic protease subunit 1) (11S regulator complex alpha subunit) (REG-alpha) (Interferon gamma up-regulated I-51) | PSME1_HUMAN | 28706 | 100% | 7 | 7 | 10 | 28.50% |
| TPC1-p15 | (Q06323) Proteasome activator complex subunit 1 (Proteasome activator 28-alpha subunit) (PA28alpha) (PA28a) (Activator of multicatalytic protease subunit 1) (11S regulator complex alpha subunit) (REG-alpha) (Interferon gamma up-regulated I-51) | PSME1_HUMAN | 28706 | 100% | 6 | 6 | 8  | 29.70% |
| TPC1-p15 | (Q06323) Proteasome activator complex subunit 1 (Proteasome activator 28-alpha subunit) (PA28alpha) (PA28a) (Activator of multicatalytic protease subunit 1) (11S regulator complex alpha subunit) (REG-alpha) (Interferon gamma up-regulated I-51) | PSME1_HUMAN | 28706 | 100% | 5 | 5 | 5  | 24.10% |

## Protein Identified Sequence Coverage in TPC-1

|          |                                                                                                                                                                                                                                                     |             |       |      |   |   |   |        |
|----------|-----------------------------------------------------------------------------------------------------------------------------------------------------------------------------------------------------------------------------------------------------|-------------|-------|------|---|---|---|--------|
| TPC1-p15 | (Q06323) Proteasome activator complex subunit 1 (Proteasome activator 28-alpha subunit) (PA28alpha) (PA28a) (Activator of multicatalytic protease subunit 1) (11S regulator complex alpha subunit) (REG-alpha) (Interferon gamma up-regulated I-51) | PSME1_HUMAN | 28706 | 100% | 5 | 5 | 8 | 24.10% |
| TPC1-p15 | (Q06323) Proteasome activator complex subunit 1 (Proteasome activator 28-alpha subunit) (PA28alpha) (PA28a) (Activator of multicatalytic protease subunit 1) (11S regulator complex alpha subunit) (REG-alpha) (Interferon gamma up-regulated I-51) | PSME1_HUMAN | 28706 | 100% | 3 | 3 | 3 | 14.90% |
| TPC1-p15 | (Q06323) Proteasome activator complex subunit 1 (Proteasome activator 28-alpha subunit) (PA28alpha) (PA28a) (Activator of multicatalytic protease subunit 1) (11S regulator complex alpha subunit) (REG-alpha) (Interferon gamma up-regulated I-51) | PSME1_HUMAN | 28706 | 100% | 2 | 2 | 2 | 7.63%  |
| TPC1-p15 | (Q06323) Proteasome activator complex subunit 1 (Proteasome activator 28-alpha subunit) (PA28alpha) (PA28a) (Activator of multicatalytic protease subunit 1) (11S regulator complex alpha subunit) (REG-alpha) (Interferon gamma up-regulated I-51) | PSME1_HUMAN | 28706 | 100% | 2 | 3 | 6 | 13.70% |
| TPC1-p15 | (Q06830) Peroxiredoxin-1 (EC 1.11.1.15) (Thioredoxin peroxidase 2) (Thioredoxin-dependent peroxide reductase 2) (Proliferation-associated protein PAG) (Natural killer cell-enhancing factor A) (NKEF-A)                                            | PRDX1_HUMAN | 22093 | 100% | 4 | 4 | 6 | 23.60% |
| TPC1-p15 | (Q06830) Peroxiredoxin-1 (EC 1.11.1.15) (Thioredoxin peroxidase 2) (Thioredoxin-dependent peroxide reductase 2) (Proliferation-associated protein PAG) (Natural killer cell-enhancing factor A) (NKEF-A)                                            | PRDX1_HUMAN | 22093 | 100% | 3 | 3 | 4 | 13.60% |
| TPC1-p15 | (Q06830) Peroxiredoxin-1 (EC 1.11.1.15) (Thioredoxin peroxidase 2) (Thioredoxin-dependent peroxide reductase 2) (Proliferation-associated protein PAG) (Natural killer cell-enhancing factor A) (NKEF-A)                                            | PRDX1_HUMAN | 22093 | 100% | 5 | 5 | 5 | 32.20% |
| TPC1-p15 | (Q06830) Peroxiredoxin-1 (EC 1.11.1.15) (Thioredoxin peroxidase 2) (Thioredoxin-dependent peroxide reductase 2) (Proliferation-associated protein PAG) (Natural killer cell-enhancing factor A) (NKEF-A)                                            | PRDX1_HUMAN | 22093 | 100% | 4 | 4 | 6 | 21.10% |
| TPC1-p15 | (Q07020) 60S ribosomal protein L18                                                                                                                                                                                                                  | RL18_HUMAN  | 21486 | 100% | 2 | 2 | 2 | 13.90% |

## Protein Identified Sequence Coverage in TPC-1

|          |                                                                                                                                                                                                                |                |        |      |   |   |    |        |
|----------|----------------------------------------------------------------------------------------------------------------------------------------------------------------------------------------------------------------|----------------|--------|------|---|---|----|--------|
| TPC1-p15 | (Q07021) Complement component 1 Q subcomponent-binding protein, mitochondrial precursor (Glycoprotein gC1qBP) (C1qBP) (GC1q-R protein) (Hyaluronan-binding protein 1) (Mitochondrial matrix protein p32) (p33) | C1QBP_HUMAN    | 31345  | 100% | 2 | 3 | 4  | 12.10% |
| TPC1-p15 | (Q07021) Complement component 1 Q subcomponent-binding protein, mitochondrial precursor (Glycoprotein gC1qBP) (C1qBP) (GC1q-R protein) (Hyaluronan-binding protein 1) (Mitochondrial matrix protein p32) (p33) | C1QBP_HUMAN    | 31345  | 100% | 3 | 4 | 6  | 21.60% |
| TPC1-p15 | (Q07021) Complement component 1 Q subcomponent-binding protein, mitochondrial precursor (Glycoprotein gC1qBP) (C1qBP) (GC1q-R protein) (Hyaluronan-binding protein 1) (Mitochondrial matrix protein p32) (p33) | C1QBP_HUMAN    | 31345  | 100% | 2 | 2 | 2  | 14.50% |
| TPC1-p15 | (Q07021) Complement component 1 Q subcomponent-binding protein, mitochondrial precursor (Glycoprotein gC1qBP) (C1qBP) (GC1q-R protein) (Hyaluronan-binding protein 1) (Mitochondrial matrix protein p32) (p33) | C1QBP_HUMAN    | 31345  | 100% | 2 | 2 | 3  | 10.30% |
| TPC1-p15 | (Q07021) Complement component 1 Q subcomponent-binding protein, mitochondrial precursor (Glycoprotein gC1qBP) (C1qBP) (GC1q-R protein) (Hyaluronan-binding protein 1) (Mitochondrial matrix protein p32) (p33) | C1QBP_HUMAN    | 31345  | 100% | 2 | 2 | 3  | 16.70% |
| TPC1-p15 | (Q07021) Complement component 1 Q subcomponent-binding protein, mitochondrial precursor (Glycoprotein gC1qBP) (C1qBP) (GC1q-R protein) (Hyaluronan-binding protein 1) (Mitochondrial matrix protein p32) (p33) | C1QBP_HUMAN    | 31345  | 100% | 2 | 3 | 7  | 14.50% |
| TPC1-p15 | (Q07812) Apoptosis regulator BAX, membrane isoform alpha                                                                                                                                                       | BAXA_HUMAN,BAX | 24203  | 100% | 2 | 2 | 4  | 11.90% |
| TPC1-p15 | (Q07812) Apoptosis regulator BAX, membrane isoform alpha                                                                                                                                                       | BAXA_HUMAN,BAX | 21167  | 100% | 2 | 2 | 4  | 13.50% |
| TPC1-p15 | (Q07812) Apoptosis regulator BAX, membrane isoform alpha                                                                                                                                                       | BAXA_HUMAN,BAX | 21167  | 100% | 3 | 3 | 3  | 24.00% |
| TPC1-p15 | (Q07812) Apoptosis regulator BAX, membrane isoform alpha                                                                                                                                                       | BAXA_HUMAN,BAX | 24203  | 100% | 3 | 3 | 5  | 17.00% |
| TPC1-p15 | (Q07812) Apoptosis regulator BAX, membrane isoform alpha                                                                                                                                                       | BAXA_HUMAN,BAX | 21167  | 100% | 2 | 2 | 3  | 17.70% |
| TPC1-p15 | (Q07954) Low-density lipoprotein receptor-related protein 1 precursor (LRP) (Alpha-2-macroglobulin receptor) (A2MR) (Apolipoprotein E receptor) (APOER) (CD91 antigen)                                         | LRP1_HUMAN     | 504543 | 100% | 3 | 3 | 4  | 1.74%  |
| TPC1-p15 | (Q08380) Galectin-3-binding protein precursor (Lectin galactoside-binding soluble 3-binding protein) (Mac-2-binding protein) (Mac-2 BP) (MAC2BP) (Tumor-associated antigen 90K)                                | LG3BP_HUMAN    | 65314  | 100% | 6 | 7 | 11 | 17.60% |

## Protein Identified Sequence Coverage in TPC-1

|          |                                                                                                                                                                                 |             |        |      |    |    |    |        |
|----------|---------------------------------------------------------------------------------------------------------------------------------------------------------------------------------|-------------|--------|------|----|----|----|--------|
| TPC1-p15 | (Q08380) Galectin-3-binding protein precursor (Lectin galactoside-binding soluble 3-binding protein) (Mac-2-binding protein) (Mac-2 BP) (MAC2BP) (Tumor-associated antigen 90K) | LG3BP_HUMAN | 65314  | 100% | 6  | 8  | 10 | 17.60% |
| TPC1-p15 | (Q08380) Galectin-3-binding protein precursor (Lectin galactoside-binding soluble 3-binding protein) (Mac-2-binding protein) (Mac-2 BP) (MAC2BP) (Tumor-associated antigen 90K) | LG3BP_HUMAN | 65314  | 100% | 5  | 5  | 5  | 9.91%  |
| TPC1-p15 | (Q08380) Galectin-3-binding protein precursor (Lectin galactoside-binding soluble 3-binding protein) (Mac-2-binding protein) (Mac-2 BP) (MAC2BP) (Tumor-associated antigen 90K) | LG3BP_HUMAN | 65314  | 100% | 3  | 3  | 4  | 7.52%  |
| TPC1-p15 | (Q08380) Galectin-3-binding protein precursor (Lectin galactoside-binding soluble 3-binding protein) (Mac-2-binding protein) (Mac-2 BP) (MAC2BP) (Tumor-associated antigen 90K) | LG3BP_HUMAN | 65314  | 100% | 10 | 12 | 23 | 22.60% |
| TPC1-p15 | (Q08380) Galectin-3-binding protein precursor (Lectin galactoside-binding soluble 3-binding protein) (Mac-2-binding protein) (Mac-2 BP) (MAC2BP) (Tumor-associated antigen 90K) | LG3BP_HUMAN | 65314  | 100% | 9  | 12 | 21 | 20.00% |
| TPC1-p15 | (Q08380) Galectin-3-binding protein precursor (Lectin galactoside-binding soluble 3-binding protein) (Mac-2-binding protein) (Mac-2 BP) (MAC2BP) (Tumor-associated antigen 90K) | LG3BP_HUMAN | 65314  | 100% | 8  | 9  | 21 | 15.70% |
| TPC1-p15 | (Q08380) Galectin-3-binding protein precursor (Lectin galactoside-binding soluble 3-binding protein) (Mac-2-binding protein) (Mac-2 BP) (MAC2BP) (Tumor-associated antigen 90K) | LG3BP_HUMAN | 65314  | 100% | 4  | 5  | 12 | 13.00% |
| TPC1-p15 | (Q08380) Galectin-3-binding protein precursor (Lectin galactoside-binding soluble 3-binding protein) (Mac-2-binding protein) (Mac-2 BP) (MAC2BP) (Tumor-associated antigen 90K) | LG3BP_HUMAN | 65314  | 100% | 2  | 4  | 10 | 8.38%  |
| TPC1-p15 | (Q08380) Galectin-3-binding protein precursor (Lectin galactoside-binding soluble 3-binding protein) (Mac-2-binding protein) (Mac-2 BP) (MAC2BP) (Tumor-associated antigen 90K) | LG3BP_HUMAN | 65314  | 100% | 2  | 3  | 3  | 6.32%  |
| TPC1-p15 | (Q09666) Neuroblast differentiation-associated protein AHNK (Desmoyokin) (Fragments)                                                                                            | AHNK_HUMAN  | 312479 | 100% | 18 | 19 | 26 | 9.12%  |
| TPC1-p15 | (Q09666) Neuroblast differentiation-associated protein AHNK (Desmoyokin) (Fragments)                                                                                            | AHNK_HUMAN  | 312479 | 100% | 19 | 19 | 29 | 9.56%  |
| TPC1-p15 | (Q09666) Neuroblast differentiation-associated protein AHNK (Desmoyokin) (Fragments)                                                                                            | AHNK_HUMAN  | 312479 | 100% | 16 | 17 | 18 | 7.97%  |
| TPC1-p15 | (Q09666) Neuroblast differentiation-associated protein AHNK (Desmoyokin) (Fragments)                                                                                            | AHNK_HUMAN  | 312479 | 100% | 20 | 20 | 29 | 10.60% |
| TPC1-p15 | (Q09666) Neuroblast differentiation-associated protein AHNK (Desmoyokin) (Fragments)                                                                                            | AHNK_HUMAN  | 312479 | 100% | 9  | 9  | 11 | 6.89%  |
| TPC1-p15 | (Q09666) Neuroblast differentiation-associated protein AHNK (Desmoyokin) (Fragments)                                                                                            | AHNK_HUMAN  | 312479 | 100% | 14 | 15 | 19 | 7.33%  |

## Protein Identified Sequence Coverage in TPC-1

|          |                                                                                                                                                                                                                                      |             |        |      |   |    |    |        |
|----------|--------------------------------------------------------------------------------------------------------------------------------------------------------------------------------------------------------------------------------------|-------------|--------|------|---|----|----|--------|
| TPC1-p15 | (Q09666) Neuroblast differentiation-associated protein AHNK (Desmoyokin) (Fragments)                                                                                                                                                 | AHNK_HUMAN  | 312479 | 100% | 2 | 2  | 2  | 1.69%  |
| TPC1-p15 | (Q09666) Neuroblast differentiation-associated protein AHNK (Desmoyokin) (Fragments)                                                                                                                                                 | AHNK_HUMAN  | 312479 | 100% | 9 | 10 | 10 | 6.39%  |
| TPC1-p15 | (Q09666) Neuroblast differentiation-associated protein AHNK (Desmoyokin) (Fragments)                                                                                                                                                 | AHNK_HUMAN  | 312479 | 100% | 4 | 5  | 5  | 3.07%  |
| TPC1-p15 | (Q09666) Neuroblast differentiation-associated protein AHNK (Desmoyokin) (Fragments)                                                                                                                                                 | AHNK_HUMAN  | 312479 | 100% | 4 | 4  | 4  | 2.74%  |
| TPC1-p15 | (Q09666) Neuroblast differentiation-associated protein AHNK (Desmoyokin) (Fragments)                                                                                                                                                 | AHNK_HUMAN  | 312479 | 100% | 7 | 8  | 10 | 5.14%  |
| TPC1-p15 | (Q12841) Follistatin-related protein 1 precursor (Follistatin-like 1)                                                                                                                                                                | FSTL1_HUMAN | 34967  | 100% | 2 | 2  | 4  | 6.17%  |
| TPC1-p15 | (Q12841) Follistatin-related protein 1 precursor (Follistatin-like 1)                                                                                                                                                                | FSTL1_HUMAN | 34967  | 100% | 2 | 2  | 2  | 4.22%  |
| TPC1-p15 | (Q12841) Follistatin-related protein 1 precursor (Follistatin-like 1)                                                                                                                                                                | FSTL1_HUMAN | 34967  | 100% | 2 | 2  | 4  | 4.22%  |
| TPC1-p15 | (Q13428) Treacle protein (Treacher Collins syndrome protein)                                                                                                                                                                         | TCOF_HUMAN  | 144293 | 100% | 3 | 3  | 3  | 3.26%  |
| TPC1-p15 | (Q13428) Treacle protein (Treacher Collins syndrome protein)                                                                                                                                                                         | TCOF_HUMAN  | 144293 | 100% | 3 | 3  | 3  | 2.76%  |
| TPC1-p15 | (Q13428) Treacle protein (Treacher Collins syndrome protein)                                                                                                                                                                         | TCOF_HUMAN  | 144293 | 100% | 3 | 3  | 4  | 2.69%  |
| TPC1-p15 | (Q13510) Acid ceramidase precursor (EC 3.5.1.23) (Acylsphingosine deacylase) (N-acylsphingosine amidohydrolase) (AC) (Putative 32 kDa heart protein) (PHP32) [Contains: Acid ceramidase alpha subunit; Acid ceramidase beta subunit] | ASAH1_HUMAN | 44633  | 100% | 3 | 3  | 5  | 8.86%  |
| TPC1-p15 | (Q13510) Acid ceramidase precursor (EC 3.5.1.23) (Acylsphingosine deacylase) (N-acylsphingosine amidohydrolase) (AC) (Putative 32 kDa heart protein) (PHP32) [Contains: Acid ceramidase alpha subunit; Acid ceramidase beta subunit] | ASAH1_HUMAN | 44633  | 100% | 2 | 2  | 5  | 10.10% |
| TPC1-p15 | (Q13510) Acid ceramidase precursor (EC 3.5.1.23) (Acylsphingosine deacylase) (N-acylsphingosine amidohydrolase) (AC) (Putative 32 kDa heart protein) (PHP32) [Contains: Acid ceramidase alpha subunit; Acid ceramidase beta subunit] | ASAH1_HUMAN | 44633  | 100% | 2 | 2  | 2  | 7.09%  |
| TPC1-p15 | (Q13510) Acid ceramidase precursor (EC 3.5.1.23) (Acylsphingosine deacylase) (N-acylsphingosine amidohydrolase) (AC) (Putative 32 kDa heart protein) (PHP32) [Contains: Acid ceramidase alpha subunit; Acid ceramidase beta subunit] | ASAH1_HUMAN | 44633  | 100% | 9 | 12 | 19 | 23.80% |

## Protein Identified Sequence Coverage in TPC-1

|          |                                                                                                                                                                                                                                      |             |       |      |   |    |    |        |
|----------|--------------------------------------------------------------------------------------------------------------------------------------------------------------------------------------------------------------------------------------|-------------|-------|------|---|----|----|--------|
| TPC1-p15 | (Q13510) Acid ceramidase precursor (EC 3.5.1.23) (Acylsphingosine deacylase) (N-acylsphingosine amidohydrolase) (AC) (Putative 32 kDa heart protein) (PHP32) [Contains: Acid ceramidase alpha subunit; Acid ceramidase beta subunit] | ASAH1_HUMAN | 44633 | 100% | 9 | 12 | 21 | 29.40% |
| TPC1-p15 | (Q13510) Acid ceramidase precursor (EC 3.5.1.23) (Acylsphingosine deacylase) (N-acylsphingosine amidohydrolase) (AC) (Putative 32 kDa heart protein) (PHP32) [Contains: Acid ceramidase alpha subunit; Acid ceramidase beta subunit] | ASAH1_HUMAN | 44633 | 100% | 7 | 8  | 14 | 21.00% |
| TPC1-p15 | (Q13510) Acid ceramidase precursor (EC 3.5.1.23) (Acylsphingosine deacylase) (N-acylsphingosine amidohydrolase) (AC) (Putative 32 kDa heart protein) (PHP32) [Contains: Acid ceramidase alpha subunit; Acid ceramidase beta subunit] | ASAH1_HUMAN | 44633 | 100% | 4 | 4  | 9  | 21.00% |
| TPC1-p15 | (Q13510) Acid ceramidase precursor (EC 3.5.1.23) (Acylsphingosine deacylase) (N-acylsphingosine amidohydrolase) (AC) (Putative 32 kDa heart protein) (PHP32) [Contains: Acid ceramidase alpha subunit; Acid ceramidase beta subunit] | ASAH1_HUMAN | 44633 | 100% | 4 | 6  | 16 | 16.20% |
| TPC1-p15 | (Q13510) Acid ceramidase precursor (EC 3.5.1.23) (Acylsphingosine deacylase) (N-acylsphingosine amidohydrolase) (AC) (Putative 32 kDa heart protein) (PHP32) [Contains: Acid ceramidase alpha subunit; Acid ceramidase beta subunit] | ASAH1_HUMAN | 44633 | 100% | 2 | 3  | 12 | 6.33%  |
| TPC1-p15 | (Q13561) Dynactin subunit 2 (Dynactin complex 50 kDa subunit) (50 kDa dynein-associated polypeptide) (p50 dynamitin) (DCTN-50)                                                                                                       | DCTN2_HUMAN | 44083 | 100% | 2 | 2  | 2  | 8.50%  |
| TPC1-p15 | (Q13641) Trophoblast glycoprotein precursor (5T4 oncofetal trophoblast glycoprotein) (5T4 oncotrophoblast glycoprotein) (5T4 oncofetal antigen) (M6P1)                                                                               | TPBG_HUMAN  | 46015 | 100% | 3 | 3  | 4  | 11.00% |
| TPC1-p15 | (Q13641) Trophoblast glycoprotein precursor (5T4 oncofetal trophoblast glycoprotein) (5T4 oncotrophoblast glycoprotein) (5T4 oncofetal antigen) (M6P1)                                                                               | TPBG_HUMAN  | 46015 | 100% | 2 | 2  | 2  | 7.14%  |
| TPC1-p15 | (Q13641) Trophoblast glycoprotein precursor (5T4 oncofetal trophoblast glycoprotein) (5T4 oncotrophoblast glycoprotein) (5T4 oncofetal antigen) (M6P1)                                                                               | TPBG_HUMAN  | 46015 | 100% | 3 | 3  | 3  | 11.00% |
| TPC1-p15 | (Q13641) Trophoblast glycoprotein precursor (5T4 oncofetal trophoblast glycoprotein) (5T4 oncotrophoblast glycoprotein) (5T4 oncofetal antigen) (M6P1)                                                                               | TPBG_HUMAN  | 46015 | 100% | 2 | 2  | 5  | 8.33%  |

## Protein Identified Sequence Coverage in TPC-1

|          |                                                                                                                                           |             |       |      |    |    |     |        |
|----------|-------------------------------------------------------------------------------------------------------------------------------------------|-------------|-------|------|----|----|-----|--------|
| TPC1-p15 | (Q13740) CD166 antigen precursor (Activated leukocyte-cell adhesion molecule) (ALCAM)                                                     | CD166_HUMAN | 65116 | 100% | 15 | 20 | 34  | 41.20% |
| TPC1-p15 | (Q13740) CD166 antigen precursor (Activated leukocyte-cell adhesion molecule) (ALCAM)                                                     | CD166_HUMAN | 65116 | 100% | 16 | 19 | 36  | 38.30% |
| TPC1-p15 | (Q13740) CD166 antigen precursor (Activated leukocyte-cell adhesion molecule) (ALCAM)                                                     | CD166_HUMAN | 65116 | 100% | 15 | 16 | 19  | 35.50% |
| TPC1-p15 | (Q13740) CD166 antigen precursor (Activated leukocyte-cell adhesion molecule) (ALCAM)                                                     | CD166_HUMAN | 65116 | 100% | 12 | 14 | 22  | 23.80% |
| TPC1-p15 | (Q13740) CD166 antigen precursor (Activated leukocyte-cell adhesion molecule) (ALCAM)                                                     | CD166_HUMAN | 65116 | 100% | 8  | 8  | 13  | 23.50% |
| TPC1-p15 | (Q13740) CD166 antigen precursor (Activated leukocyte-cell adhesion molecule) (ALCAM)                                                     | CD166_HUMAN | 65116 | 100% | 14 | 18 | 60  | 33.60% |
| TPC1-p15 | (Q13740) CD166 antigen precursor (Activated leukocyte-cell adhesion molecule) (ALCAM)                                                     | CD166_HUMAN | 65116 | 100% | 19 | 23 | 65  | 42.50% |
| TPC1-p15 | (Q13740) CD166 antigen precursor (Activated leukocyte-cell adhesion molecule) (ALCAM)                                                     | CD166_HUMAN | 65116 | 100% | 14 | 14 | 47  | 31.90% |
| TPC1-p15 | (Q13740) CD166 antigen precursor (Activated leukocyte-cell adhesion molecule) (ALCAM)                                                     | CD166_HUMAN | 65116 | 100% | 10 | 10 | 33  | 35.70% |
| TPC1-p15 | (Q13740) CD166 antigen precursor (Activated leukocyte-cell adhesion molecule) (ALCAM)                                                     | CD166_HUMAN | 65116 | 100% | 7  | 10 | 30  | 19.20% |
| TPC1-p15 | (Q13740) CD166 antigen precursor (Activated leukocyte-cell adhesion molecule) (ALCAM)                                                     | CD166_HUMAN | 65116 | 100% | 2  | 3  | 7   | 6.86%  |
| TPC1-p15 | (Q13740) CD166 antigen precursor (Activated leukocyte-cell adhesion molecule) (ALCAM)                                                     | CD166_HUMAN | 65116 | 100% | 5  | 7  | 17  | 13.40% |
| TPC1-p15 | (Q13740) CD166 antigen precursor (Activated leukocyte-cell adhesion molecule) (ALCAM)                                                     | CD166_HUMAN | 65116 | 100% | 2  | 3  | 4   | 6.86%  |
| TPC1-p15 | (Q13740) CD166 antigen precursor (Activated leukocyte-cell adhesion molecule) (ALCAM)                                                     | CD166_HUMAN | 65116 | 100% | 6  | 9  | 119 | 19.00% |
| TPC1-p15 | (Q13740) CD166 antigen precursor (Activated leukocyte-cell adhesion molecule) (ALCAM)                                                     | CD166_HUMAN | 65116 | 100% | 5  | 8  | 21  | 16.30% |
| TPC1-p15 | (Q13740) CD166 antigen precursor (Activated leukocyte-cell adhesion molecule) (ALCAM)                                                     | CD166_HUMAN | 65116 | 100% | 4  | 6  | 12  | 16.30% |
| TPC1-p15 | (Q15084) Protein disulfide-isomerase A6 precursor (EC 5.3.4.1) (Protein disulfide isomerase P5) (Thioredoxin domain-containing protein 7) | PDIA6_HUMAN | 48104 | 100% | 9  | 12 | 18  | 35.20% |
| TPC1-p15 | (Q15084) Protein disulfide-isomerase A6 precursor (EC 5.3.4.1) (Protein disulfide isomerase P5) (Thioredoxin domain-containing protein 7) | PDIA6_HUMAN | 48104 | 100% | 11 | 14 | 23  | 42.30% |
| TPC1-p15 | (Q15084) Protein disulfide-isomerase A6 precursor (EC 5.3.4.1) (Protein disulfide isomerase P5) (Thioredoxin domain-containing protein 7) | PDIA6_HUMAN | 48104 | 100% | 8  | 10 | 11  | 32.30% |
| TPC1-p15 | (Q15084) Protein disulfide-isomerase A6 precursor (EC 5.3.4.1) (Protein disulfide isomerase P5) (Thioredoxin domain-containing protein 7) | PDIA6_HUMAN | 48104 | 100% | 8  | 8  | 14  | 32.30% |



## Protein Identified Sequence Coverage in TPC-1

|          |                                                                                                                                                                                                   |             |       |      |   |    |    |        |
|----------|---------------------------------------------------------------------------------------------------------------------------------------------------------------------------------------------------|-------------|-------|------|---|----|----|--------|
| TPC1-p15 | (Q15084) Protein disulfide-isomerase A6 precursor (EC 5.3.4.1) (Protein disulfide isomerase P5) (Thioredoxin domain-containing protein 7)                                                         | PDIA6_HUMAN | 48104 | 100% | 4 | 4  | 6  | 22.30% |
| TPC1-p15 | (Q15084) Protein disulfide-isomerase A6 precursor (EC 5.3.4.1) (Protein disulfide isomerase P5) (Thioredoxin domain-containing protein 7)                                                         | PDIA6_HUMAN | 48104 | 100% | 8 | 11 | 48 | 29.80% |
| TPC1-p15 | (Q15084) Protein disulfide-isomerase A6 precursor (EC 5.3.4.1) (Protein disulfide isomerase P5) (Thioredoxin domain-containing protein 7)                                                         | PDIA6_HUMAN | 48104 | 100% | 2 | 2  | 2  | 5.68%  |
| TPC1-p15 | (Q15084) Protein disulfide-isomerase A6 precursor (EC 5.3.4.1) (Protein disulfide isomerase P5) (Thioredoxin domain-containing protein 7)                                                         | PDIA6_HUMAN | 48104 | 100% | 5 | 7  | 27 | 20.70% |
| TPC1-p15 | (Q15084) Protein disulfide-isomerase A6 precursor (EC 5.3.4.1) (Protein disulfide isomerase P5) (Thioredoxin domain-containing protein 7)                                                         | PDIA6_HUMAN | 48104 | 100% | 3 | 4  | 8  | 14.30% |
| TPC1-p15 | (Q15084) Protein disulfide-isomerase A6 precursor (EC 5.3.4.1) (Protein disulfide isomerase P5) (Thioredoxin domain-containing protein 7)                                                         | PDIA6_HUMAN | 48104 | 100% | 3 | 4  | 5  | 10.90% |
| TPC1-p15 | (Q15582) Transforming growth factor-beta-induced protein ig-h3 precursor (Beta ig-h3) (Kerato-epithelin) (RGD-containing collagen-associated protein) (RGD-CAP)                                   | BGH3_HUMAN  | 74665 | 100% | 2 | 2  | 2  | 6.15%  |
| TPC1-p15 | (Q15582) Transforming growth factor-beta-induced protein ig-h3 precursor (Beta ig-h3) (Kerato-epithelin) (RGD-containing collagen-associated protein) (RGD-CAP)                                   | BGH3_HUMAN  | 74665 | 100% | 2 | 2  | 2  | 7.03%  |
| TPC1-p15 | (Q15758) Neutral amino acid transporter B(0) (ATB(0)) (Sodium-dependent neutral amino acid transporter type 2) (RD114/simian type D retrovirus receptor) (Baboon M7 virus receptor)               | AAAT_HUMAN  | 56582 | 100% | 2 | 2  | 2  | 5.73%  |
| TPC1-p15 | (Q16270) Insulin-like growth factor-binding protein 7 precursor (IGFBP-7) (IBP-7) (IGF-binding protein 7) (MAC25 protein) (Prostacyclin-stimulating factor) (PGI2-stimulating factor) (IGFBP-rP1) | IBP7_HUMAN  | 29112 | 100% | 9 | 10 | 20 | 35.50% |
| TPC1-p15 | (Q16270) Insulin-like growth factor-binding protein 7 precursor (IGFBP-7) (IBP-7) (IGF-binding protein 7) (MAC25 protein) (Prostacyclin-stimulating factor) (PGI2-stimulating factor) (IGFBP-rP1) | IBP7_HUMAN  | 29112 | 100% | 8 | 9  | 21 | 35.10% |

## Protein Identified Sequence Coverage in TPC-1

|          |                                                                                                                                                                                                   |             |       |      |   |    |    |        |
|----------|---------------------------------------------------------------------------------------------------------------------------------------------------------------------------------------------------|-------------|-------|------|---|----|----|--------|
| TPC1-p15 | (Q16270) Insulin-like growth factor-binding protein 7 precursor (IGFBP-7) (IBP-7) (IGF-binding protein 7) (MAC25 protein) (Prostacyclin-stimulating factor) (PGI2-stimulating factor) (IGFBP-rP1) | IBP7_HUMAN  | 29112 | 100% | 9 | 10 | 15 | 39.00% |
| TPC1-p15 | (Q16270) Insulin-like growth factor-binding protein 7 precursor (IGFBP-7) (IBP-7) (IGF-binding protein 7) (MAC25 protein) (Prostacyclin-stimulating factor) (PGI2-stimulating factor) (IGFBP-rP1) | IBP7_HUMAN  | 29112 | 100% | 7 | 7  | 21 | 35.50% |
| TPC1-p15 | (Q16270) Insulin-like growth factor-binding protein 7 precursor (IGFBP-7) (IBP-7) (IGF-binding protein 7) (MAC25 protein) (Prostacyclin-stimulating factor) (PGI2-stimulating factor) (IGFBP-rP1) | IBP7_HUMAN  | 29112 | 100% | 3 | 3  | 4  | 21.60% |
| TPC1-p15 | (Q16270) Insulin-like growth factor-binding protein 7 precursor (IGFBP-7) (IBP-7) (IGF-binding protein 7) (MAC25 protein) (Prostacyclin-stimulating factor) (PGI2-stimulating factor) (IGFBP-rP1) | IBP7_HUMAN  | 29112 | 100% | 3 | 4  | 6  | 15.20% |
| TPC1-p15 | (Q16270) Insulin-like growth factor-binding protein 7 precursor (IGFBP-7) (IBP-7) (IGF-binding protein 7) (MAC25 protein) (Prostacyclin-stimulating factor) (PGI2-stimulating factor) (IGFBP-rP1) | IBP7_HUMAN  | 29112 | 100% | 2 | 3  | 4  | 10.30% |
| TPC1-p15 | (Q16270) Insulin-like growth factor-binding protein 7 precursor (IGFBP-7) (IBP-7) (IGF-binding protein 7) (MAC25 protein) (Prostacyclin-stimulating factor) (PGI2-stimulating factor) (IGFBP-rP1) | IBP7_HUMAN  | 29112 | 100% | 3 | 3  | 5  | 16.30% |
| TPC1-p15 | (Q16270) Insulin-like growth factor-binding protein 7 precursor (IGFBP-7) (IBP-7) (IGF-binding protein 7) (MAC25 protein) (Prostacyclin-stimulating factor) (PGI2-stimulating factor) (IGFBP-rP1) | IBP7_HUMAN  | 29112 | 100% | 3 | 3  | 4  | 14.90% |
| TPC1-p15 | (Q16270) Insulin-like growth factor-binding protein 7 precursor (IGFBP-7) (IBP-7) (IGF-binding protein 7) (MAC25 protein) (Prostacyclin-stimulating factor) (PGI2-stimulating factor) (IGFBP-rP1) | IBP7_HUMAN  | 29112 | 100% | 2 | 3  | 7  | 10.30% |
| TPC1-p15 | (Q5ZPR3) CD276 antigen precursor (Costimulatory molecule) (B7 homolog 3) (B7-H3) (4Ig-B7-H3)                                                                                                      | CD276_HUMAN | 57216 | 100% | 4 | 5  | 10 | 16.70% |
| TPC1-p15 | (Q5ZPR3) CD276 antigen precursor (Costimulatory molecule) (B7 homolog 3) (B7-H3) (4Ig-B7-H3)                                                                                                      | CD276_HUMAN | 57216 | 100% | 4 | 5  | 10 | 16.70% |
| TPC1-p15 | (Q5ZPR3) CD276 antigen precursor (Costimulatory molecule) (B7 homolog 3) (B7-H3) (4Ig-B7-H3)                                                                                                      | CD276_HUMAN | 57216 | 100% | 2 | 3  | 6  | 5.62%  |

## Protein Identified Sequence Coverage in TPC-1

|          |                                                                                                                                                       |                |        |      |   |   |    |        |
|----------|-------------------------------------------------------------------------------------------------------------------------------------------------------|----------------|--------|------|---|---|----|--------|
| TPC1-p15 | (Q5ZPR3) CD276 antigen precursor (Costimulatory molecule) (B7 homolog 3) (B7-H3) (4Ig-B7-H3)                                                          | CD276_HUMAN    | 57216  | 100% | 2 | 2 | 4  | 11.00% |
| TPC1-p15 | (Q5ZPR3) CD276 antigen precursor (Costimulatory molecule) (B7 homolog 3) (B7-H3) (4Ig-B7-H3)                                                          | CD276_HUMAN    | 57216  | 100% | 2 | 2 | 3  | 7.49%  |
| TPC1-p15 | (Q5ZPR3) CD276 antigen precursor (Costimulatory molecule) (B7 homolog 3) (B7-H3) (4Ig-B7-H3)                                                          | CD276_HUMAN    | 57216  | 100% | 2 | 2 | 2  | 7.49%  |
| TPC1-p15 | (Q5ZPR3) CD276 antigen precursor (Costimulatory molecule) (B7 homolog 3) (B7-H3) (4Ig-B7-H3)                                                          | CD276_HUMAN    | 57216  | 100% | 2 | 3 | 3  | 8.24%  |
| TPC1-p15 | (Q6EMK4) Vasorin precursor (Protein Slit-like 2)                                                                                                      | VASN_HUMAN     | 71696  | 100% | 2 | 2 | 2  | 5.94%  |
| TPC1-p15 | (Q6EMK4) Vasorin precursor (Protein Slit-like 2)                                                                                                      | VASN_HUMAN     | 71696  | 100% | 2 | 2 | 4  | 9.81%  |
| TPC1-p15 | (Q6EMK4) Vasorin precursor (Protein Slit-like 2)                                                                                                      | VASN_HUMAN     | 71696  | 100% | 2 | 2 | 2  | 4.75%  |
| TPC1-p15 | (Q6FI13) Histone H2A type 2-A (H2A.2)                                                                                                                 | H2A2A_HUMAN,H2 | 13947  | 100% | 2 | 4 | 7  | 49.60% |
| TPC1-p15 | (Q6FI13) Histone H2A type 2-A (H2A.2)                                                                                                                 | H2A2A_HUMAN,H2 | 13840  | 100% | 2 | 3 | 8  | 35.90% |
| TPC1-p15 | (Q6FI13) Histone H2A type 2-A (H2A.2)                                                                                                                 | H2A2A_HUMAN,H2 | 13840  | 100% | 2 | 3 | 5  | 35.90% |
| TPC1-p15 | (Q6FI13) Histone H2A type 2-A (H2A.2)                                                                                                                 | H2A2A_HUMAN,H2 | 13840  | 100% | 2 | 3 | 69 | 44.50% |
| TPC1-p15 | (Q6FI13) Histone H2A type 2-A (H2A.2)                                                                                                                 | H2A2A_HUMAN,H2 | 13840  | 100% | 2 | 3 | 10 | 44.50% |
| TPC1-p15 | (Q71UI9) Histone H2AV (H2A.F/Z)                                                                                                                       | H2AV_HUMAN,H2A | 13360  | 100% | 3 | 3 | 11 | 20.50% |
| TPC1-p15 | (Q71UI9) Histone H2AV (H2A.F/Z)                                                                                                                       | H2AV_HUMAN,H2A | 13404  | 100% | 3 | 3 | 13 | 23.60% |
| TPC1-p15 | (Q71UI9) Histone H2AV (H2A.F/Z)                                                                                                                       | H2AV_HUMAN,H2A | 13404  | 100% | 2 | 2 | 12 | 12.60% |
| TPC1-p15 | (Q71UI9) Histone H2AV (H2A.F/Z)                                                                                                                       | H2AV_HUMAN,H2A | 13404  | 100% | 2 | 2 | 3  | 36.20% |
| TPC1-p15 | (Q8IYB3) Serine/arginine repetitive matrix protein 1 (Ser/Arg-related nuclear matrix protein) (SR-related nuclear matrix protein of 160 kDa) (SRm160) | SRRM1_HUMAN    | 102319 | 100% | 3 | 5 | 8  | 4.65%  |
| TPC1-p15 | (Q8IYB3) Serine/arginine repetitive matrix protein 1 (Ser/Arg-related nuclear matrix protein) (SR-related nuclear matrix protein of 160 kDa) (SRm160) | SRRM1_HUMAN    | 102319 | 100% | 5 | 7 | 13 | 5.86%  |
| TPC1-p15 | (Q8IYB3) Serine/arginine repetitive matrix protein 1 (Ser/Arg-related nuclear matrix protein) (SR-related nuclear matrix protein of 160 kDa) (SRm160) | SRRM1_HUMAN    | 102319 | 100% | 4 | 5 | 6  | 8.30%  |
| TPC1-p15 | (Q8IYB3) Serine/arginine repetitive matrix protein 1 (Ser/Arg-related nuclear matrix protein) (SR-related nuclear matrix protein of 160 kDa) (SRm160) | SRRM1_HUMAN    | 102319 | 100% | 5 | 6 | 10 | 5.86%  |
| TPC1-p15 | (Q8IYB3) Serine/arginine repetitive matrix protein 1 (Ser/Arg-related nuclear matrix protein) (SR-related nuclear matrix protein of 160 kDa) (SRm160) | SRRM1_HUMAN    | 102319 | 100% | 3 | 4 | 14 | 6.31%  |
| TPC1-p15 | (Q8IYB3) Serine/arginine repetitive matrix protein 1 (Ser/Arg-related nuclear matrix protein) (SR-related nuclear matrix protein of 160 kDa) (SRm160) | SRRM1_HUMAN    | 102319 | 100% | 2 | 3 | 4  | 8.74%  |
| TPC1-p15 | (Q8N8S7) Protein enabled homolog                                                                                                                      | ENAH_HUMAN     | 66493  | 100% | 2 | 2 | 4  | 7.28%  |

## Protein Identified Sequence Coverage in TPC-1

|          |                                                                                                                                                                 |             |       |      |   |   |    |        |
|----------|-----------------------------------------------------------------------------------------------------------------------------------------------------------------|-------------|-------|------|---|---|----|--------|
| TPC1-p15 | (Q8NBJ7) Sulfatase-modifying factor 2 precursor (C-alpha-formylglycine-generating enzyme 2)                                                                     | SUMF2_HUMAN | 33839 | 100% | 6 | 6 | 7  | 21.30% |
| TPC1-p15 | (Q8NBJ7) Sulfatase-modifying factor 2 precursor (C-alpha-formylglycine-generating enzyme 2)                                                                     | SUMF2_HUMAN | 33839 | 100% | 3 | 3 | 4  | 13.30% |
| TPC1-p15 | (Q8NBJ7) Sulfatase-modifying factor 2 precursor (C-alpha-formylglycine-generating enzyme 2)                                                                     | SUMF2_HUMAN | 33839 | 100% | 4 | 4 | 5  | 16.90% |
| TPC1-p15 | (Q8NBJ7) Sulfatase-modifying factor 2 precursor (C-alpha-formylglycine-generating enzyme 2)                                                                     | SUMF2_HUMAN | 33839 | 100% | 3 | 3 | 4  | 13.30% |
| TPC1-p15 | (Q8NBS9) Thioredoxin domain-containing protein 5 precursor (Thioredoxin-like protein p46) (Endoplasmic reticulum protein ERp46)                                 | TXND5_HUMAN | 47611 | 100% | 2 | 2 | 2  | 6.94%  |
| TPC1-p15 | (Q8NBS9) Thioredoxin domain-containing protein 5 precursor (Thioredoxin-like protein p46) (Endoplasmic reticulum protein ERp46)                                 | TXND5_HUMAN | 47611 | 100% | 2 | 2 | 2  | 6.25%  |
| TPC1-p15 | (Q8NBS9) Thioredoxin domain-containing protein 5 precursor (Thioredoxin-like protein p46) (Endoplasmic reticulum protein ERp46)                                 | TXND5_HUMAN | 47611 | 100% | 3 | 3 | 4  | 7.18%  |
| TPC1-p15 | (Q8NBX0) Probable saccharopine dehydrogenase (EC 1.5.1.9)                                                                                                       | SCPDH_HUMAN | 47135 | 100% | 3 | 3 | 7  | 17.00% |
| TPC1-p15 | (Q8NBX0) Probable saccharopine dehydrogenase (EC 1.5.1.9)                                                                                                       | SCPDH_HUMAN | 47135 | 100% | 2 | 2 | 3  | 12.10% |
| TPC1-p15 | (Q8NBX0) Probable saccharopine dehydrogenase (EC 1.5.1.9)                                                                                                       | SCPDH_HUMAN | 47135 | 100% | 2 | 2 | 6  | 10.30% |
| TPC1-p15 | (Q8NBX0) Probable saccharopine dehydrogenase (EC 1.5.1.9)                                                                                                       | SCPDH_HUMAN | 47135 | 100% | 2 | 2 | 4  | 8.39%  |
| TPC1-p15 | (Q8NBX0) Probable saccharopine dehydrogenase (EC 1.5.1.9)                                                                                                       | SCPDH_HUMAN | 47135 | 100% | 3 | 4 | 21 | 20.00% |
| TPC1-p15 | (Q8NBX0) Probable saccharopine dehydrogenase (EC 1.5.1.9)                                                                                                       | SCPDH_HUMAN | 47135 | 100% | 3 | 3 | 11 | 20.00% |
| TPC1-p15 | (Q8NCC3) 1-O-acylceramide synthase precursor (EC 2.3.1.-) (ACS) (Lysosomal phospholipase A2) (Lysophospholipase 3) (LPLA2) (LCAT-like lysophospholipase) (LLPL) | LYPA3_HUMAN | 46641 | 100% | 2 | 2 | 2  | 7.04%  |
| TPC1-p15 | (Q8NCC3) 1-O-acylceramide synthase precursor (EC 2.3.1.-) (ACS) (Lysosomal phospholipase A2) (Lysophospholipase 3) (LPLA2) (LCAT-like lysophospholipase) (LLPL) | LYPA3_HUMAN | 46641 | 100% | 4 | 4 | 6  | 12.90% |
| TPC1-p15 | (Q8NCC3) 1-O-acylceramide synthase precursor (EC 2.3.1.-) (ACS) (Lysosomal phospholipase A2) (Lysophospholipase 3) (LPLA2) (LCAT-like lysophospholipase) (LLPL) | LYPA3_HUMAN | 46641 | 100% | 3 | 3 | 3  | 10.20% |
| TPC1-p15 | (Q8NCC3) 1-O-acylceramide synthase precursor (EC 2.3.1.-) (ACS) (Lysosomal phospholipase A2) (Lysophospholipase 3) (LPLA2) (LCAT-like lysophospholipase) (LLPL) | LYPA3_HUMAN | 46641 | 100% | 5 | 5 | 7  | 16.30% |
| TPC1-p15 | (Q8NCC3) 1-O-acylceramide synthase precursor (EC 2.3.1.-) (ACS) (Lysosomal phospholipase A2) (Lysophospholipase 3) (LPLA2) (LCAT-like lysophospholipase) (LLPL) | LYPA3_HUMAN | 46641 | 100% | 2 | 4 | 4  | 10.20% |

## Protein Identified Sequence Coverage in TPC-1

|          |                                                                                                                                                                 |             |       |      |   |    |    |        |
|----------|-----------------------------------------------------------------------------------------------------------------------------------------------------------------|-------------|-------|------|---|----|----|--------|
| TPC1-p15 | (Q8NCC3) 1-O-acylceramide synthase precursor (EC 2.3.1.-) (ACS) (Lysosomal phospholipase A2) (Lysophospholipase 3) (LPLA2) (LCAT-like lysophospholipase) (LLPL) | LYPA3_HUMAN | 46641 | 100% | 3 | 3  | 5  | 14.80% |
| TPC1-p15 | (Q8NCC3) 1-O-acylceramide synthase precursor (EC 2.3.1.-) (ACS) (Lysosomal phospholipase A2) (Lysophospholipase 3) (LPLA2) (LCAT-like lysophospholipase) (LLPL) | LYPA3_HUMAN | 46641 | 100% | 2 | 2  | 5  | 5.34%  |
| TPC1-p15 | (Q8WUT4) Protein C20orf75 precursor                                                                                                                             | CT075_HUMAN | 78826 | 100% | 6 | 7  | 12 | 12.20% |
| TPC1-p15 | (Q8WUT4) Protein C20orf75 precursor                                                                                                                             | CT075_HUMAN | 78826 | 100% | 3 | 3  | 4  | 5.41%  |
| TPC1-p15 | (Q8WUT4) Protein C20orf75 precursor                                                                                                                             | CT075_HUMAN | 78826 | 100% | 4 | 4  | 4  | 6.22%  |
| TPC1-p15 | (Q8WUT4) Protein C20orf75 precursor                                                                                                                             | CT075_HUMAN | 78826 | 100% | 3 | 3  | 5  | 5.27%  |
| TPC1-p15 | (Q8WUT4) Protein C20orf75 precursor                                                                                                                             | CT075_HUMAN | 78826 | 100% | 2 | 2  | 2  | 7.16%  |
| TPC1-p15 | (Q8WUT4) Protein C20orf75 precursor                                                                                                                             | CT075_HUMAN | 78826 | 100% | 2 | 3  | 4  | 5.54%  |
| TPC1-p15 | (Q8WUT4) Protein C20orf75 precursor                                                                                                                             | CT075_HUMAN | 78826 | 100% | 3 | 3  | 4  | 7.84%  |
| TPC1-p15 | (Q8WUT4) Protein C20orf75 precursor                                                                                                                             | CT075_HUMAN | 78826 | 100% | 3 | 4  | 6  | 9.05%  |
| TPC1-p15 | (Q92484) Acid sphingomyelinase-like phosphodiesterase 3a precursor (EC 3.1.4.-) (ASM-like phosphodiesterase 3a)                                                 | ASM3A_HUMAN | 51244 | 100% | 3 | 3  | 4  | 13.90% |
| TPC1-p15 | (Q92484) Acid sphingomyelinase-like phosphodiesterase 3a precursor (EC 3.1.4.-) (ASM-like phosphodiesterase 3a)                                                 | ASM3A_HUMAN | 51244 | 100% | 2 | 2  | 2  | 8.61%  |
| TPC1-p15 | (Q92484) Acid sphingomyelinase-like phosphodiesterase 3a precursor (EC 3.1.4.-) (ASM-like phosphodiesterase 3a)                                                 | ASM3A_HUMAN | 51244 | 100% | 2 | 2  | 3  | 8.61%  |
| TPC1-p15 | (Q92484) Acid sphingomyelinase-like phosphodiesterase 3a precursor (EC 3.1.4.-) (ASM-like phosphodiesterase 3a)                                                 | ASM3A_HUMAN | 51244 | 100% | 2 | 2  | 3  | 8.39%  |
| TPC1-p15 | (Q92484) Acid sphingomyelinase-like phosphodiesterase 3a precursor (EC 3.1.4.-) (ASM-like phosphodiesterase 3a)                                                 | ASM3A_HUMAN | 51244 | 100% | 2 | 2  | 2  | 8.39%  |
| TPC1-p15 | (Q92820) Gamma-glutamyl hydrolase precursor (EC 3.4.19.9) (Gamma-Glu-X carboxypeptidase) (Conjugase) (GH)                                                       | GGH_HUMAN   | 35948 | 100% | 8 | 12 | 22 | 34.90% |
| TPC1-p15 | (Q92820) Gamma-glutamyl hydrolase precursor (EC 3.4.19.9) (Gamma-Glu-X carboxypeptidase) (Conjugase) (GH)                                                       | GGH_HUMAN   | 35948 | 100% | 9 | 13 | 26 | 35.80% |
| TPC1-p15 | (Q92820) Gamma-glutamyl hydrolase precursor (EC 3.4.19.9) (Gamma-Glu-X carboxypeptidase) (Conjugase) (GH)                                                       | GGH_HUMAN   | 35948 | 100% | 7 | 10 | 16 | 32.40% |
| TPC1-p15 | (Q92820) Gamma-glutamyl hydrolase precursor (EC 3.4.19.9) (Gamma-Glu-X carboxypeptidase) (Conjugase) (GH)                                                       | GGH_HUMAN   | 35948 | 100% | 8 | 8  | 20 | 31.80% |
| TPC1-p15 | (Q92820) Gamma-glutamyl hydrolase precursor (EC 3.4.19.9) (Gamma-Glu-X carboxypeptidase) (Conjugase) (GH)                                                       | GGH_HUMAN   | 35948 | 100% | 6 | 7  | 13 | 27.70% |
| TPC1-p15 | (Q92820) Gamma-glutamyl hydrolase precursor (EC 3.4.19.9) (Gamma-Glu-X carboxypeptidase) (Conjugase) (GH)                                                       | GGH_HUMAN   | 35948 | 100% | 6 | 6  | 9  | 27.70% |

## Protein Identified Sequence Coverage in TPC-1

|          |                                                                                                                                                                                  |             |        |      |   |   |    |        |
|----------|----------------------------------------------------------------------------------------------------------------------------------------------------------------------------------|-------------|--------|------|---|---|----|--------|
| TPC1-p15 | (Q92820) Gamma-glutamyl hydrolase precursor (EC 3.4.19.9) (Gamma-Glu-X carboxypeptidase) (Conjugase) (GH)                                                                        | GGH_HUMAN   | 35948  | 100% | 7 | 7 | 19 | 28.90% |
| TPC1-p15 | (Q92820) Gamma-glutamyl hydrolase precursor (EC 3.4.19.9) (Gamma-Glu-X carboxypeptidase) (Conjugase) (GH)                                                                        | GGH_HUMAN   | 35948  | 100% | 5 | 5 | 16 | 17.30% |
| TPC1-p15 | (Q92820) Gamma-glutamyl hydrolase precursor (EC 3.4.19.9) (Gamma-Glu-X carboxypeptidase) (Conjugase) (GH)                                                                        | GGH_HUMAN   | 35948  | 100% | 3 | 4 | 24 | 16.00% |
| TPC1-p15 | (Q92820) Gamma-glutamyl hydrolase precursor (EC 3.4.19.9) (Gamma-Glu-X carboxypeptidase) (Conjugase) (GH)                                                                        | GGH_HUMAN   | 35948  | 100% | 2 | 2 | 7  | 7.86%  |
| TPC1-p15 | (Q92820) Gamma-glutamyl hydrolase precursor (EC 3.4.19.9) (Gamma-Glu-X carboxypeptidase) (Conjugase) (GH)                                                                        | GGH_HUMAN   | 35948  | 100% | 2 | 2 | 5  | 11.90% |
| TPC1-p15 | (Q92820) Gamma-glutamyl hydrolase precursor (EC 3.4.19.9) (Gamma-Glu-X carboxypeptidase) (Conjugase) (GH)                                                                        | GGH_HUMAN   | 35948  | 100% | 3 | 5 | 39 | 13.20% |
| TPC1-p15 | (Q92820) Gamma-glutamyl hydrolase precursor (EC 3.4.19.9) (Gamma-Glu-X carboxypeptidase) (Conjugase) (GH)                                                                        | GGH_HUMAN   | 35948  | 100% | 3 | 5 | 9  | 12.30% |
| TPC1-p15 | (Q92820) Gamma-glutamyl hydrolase precursor (EC 3.4.19.9) (Gamma-Glu-X carboxypeptidase) (Conjugase) (GH)                                                                        | GGH_HUMAN   | 35948  | 100% | 2 | 3 | 4  | 8.49%  |
| TPC1-p15 | (Q92859) Neogenin precursor                                                                                                                                                      | NEO1_HUMAN  | 159942 | 100% | 2 | 3 | 3  | 2.81%  |
| TPC1-p15 | (Q92896) Golgi apparatus protein 1 precursor (Golgi sialoglycoprotein MG-160) (E-selectin ligand 1) (ESL-1) (Cysteine-rich fibroblast growth factor receptor) (CFR-1)            | GSLG1_HUMAN | 134577 | 100% | 2 | 2 | 2  | 3.31%  |
| TPC1-p15 | (Q92896) Golgi apparatus protein 1 precursor (Golgi sialoglycoprotein MG-160) (E-selectin ligand 1) (ESL-1) (Cysteine-rich fibroblast growth factor receptor) (CFR-1)            | GSLG1_HUMAN | 134577 | 100% | 2 | 3 | 3  | 3.05%  |
| TPC1-p15 | (Q92896) Golgi apparatus protein 1 precursor (Golgi sialoglycoprotein MG-160) (E-selectin ligand 1) (ESL-1) (Cysteine-rich fibroblast growth factor receptor) (CFR-1)            | GSLG1_HUMAN | 134577 | 100% | 5 | 5 | 6  | 9.67%  |
| TPC1-p15 | (Q92896) Golgi apparatus protein 1 precursor (Golgi sialoglycoprotein MG-160) (E-selectin ligand 1) (ESL-1) (Cysteine-rich fibroblast growth factor receptor) (CFR-1)            | GSLG1_HUMAN | 134577 | 100% | 3 | 4 | 5  | 4.24%  |
| TPC1-p15 | (Q96AY3) FK506-binding protein 10 precursor (EC 5.2.1.8) (Peptidyl-prolyl cis-trans isomerase) (PPIase) (Rotamase) (65 kDa FK506-binding protein) (FKBP65) (Immunophilin FKBP65) | FKB10_HUMAN | 64228  | 100% | 2 | 2 | 2  | 4.98%  |
| TPC1-p15 | (Q96AY3) FK506-binding protein 10 precursor (EC 5.2.1.8) (Peptidyl-prolyl cis-trans isomerase) (PPIase) (Rotamase) (65 kDa FK506-binding protein) (FKBP65) (Immunophilin FKBP65) | FKB10_HUMAN | 64228  | 100% | 3 | 3 | 3  | 5.50%  |

## Protein Identified Sequence Coverage in TPC-1

|          |                                                                                                                                                                                     |             |       |      |    |    |    |        |
|----------|-------------------------------------------------------------------------------------------------------------------------------------------------------------------------------------|-------------|-------|------|----|----|----|--------|
| TPC1-p15 | (Q96AY3) FK506-binding protein 10 precursor (EC 5.2.1.8) (Peptidyl-prolyl cis-trans isomerase) (PPIase) (Rotamase) (65 kDa FK506-binding protein) (FKBP65) (Immunophilin FKBP65)    | FKB10_HUMAN | 64228 | 100% | 2  | 2  | 3  | 7.73%  |
| TPC1-p15 | (Q96AY3) FK506-binding protein 10 precursor (EC 5.2.1.8) (Peptidyl-prolyl cis-trans isomerase) (PPIase) (Rotamase) (65 kDa FK506-binding protein) (FKBP65) (Immunophilin FKBP65)    | FKB10_HUMAN | 64228 | 100% | 3  | 3  | 5  | 11.00% |
| TPC1-p15 | (Q96AY3) FK506-binding protein 10 precursor (EC 5.2.1.8) (Peptidyl-prolyl cis-trans isomerase) (PPIase) (Rotamase) (65 kDa FK506-binding protein) (FKBP65) (Immunophilin FKBP65)    | FKB10_HUMAN | 64228 | 100% | 3  | 3  | 4  | 9.79%  |
| TPC1-p15 | (Q96D42) Hepatitis A virus cellular receptor 1 precursor (HAVcr-1) (T cell immunoglobulin and mucin domain-containing protein 1) (TIMD-1) (T cell membrane protein 1) (TIM-1) (TIM) | TIMD1_HUMAN | 38701 | 100% | 3  | 3  | 5  | 13.10% |
| TPC1-p15 | (Q96D42) Hepatitis A virus cellular receptor 1 precursor (HAVcr-1) (T cell immunoglobulin and mucin domain-containing protein 1) (TIMD-1) (T cell membrane protein 1) (TIM-1) (TIM) | TIMD1_HUMAN | 38701 | 100% | 2  | 3  | 4  | 13.10% |
| TPC1-p15 | (Q96HE7) ERO1-like protein alpha precursor (EC 1.8.4.-) (ERO1-Lalpha) (Oxidoreductin-1-Lalpha) (Endoplasmic oxidoreductin-1-like protein) (ERO1-L)                                  | ERO1A_HUMAN | 54377 | 100% | 14 | 17 | 27 | 41.20% |
| TPC1-p15 | (Q96HE7) ERO1-like protein alpha precursor (EC 1.8.4.-) (ERO1-Lalpha) (Oxidoreductin-1-Lalpha) (Endoplasmic oxidoreductin-1-like protein) (ERO1-L)                                  | ERO1A_HUMAN | 54377 | 100% | 12 | 16 | 26 | 33.30% |
| TPC1-p15 | (Q96HE7) ERO1-like protein alpha precursor (EC 1.8.4.-) (ERO1-Lalpha) (Oxidoreductin-1-Lalpha) (Endoplasmic oxidoreductin-1-like protein) (ERO1-L)                                  | ERO1A_HUMAN | 54377 | 100% | 13 | 14 | 15 | 37.00% |
| TPC1-p15 | (Q96HE7) ERO1-like protein alpha precursor (EC 1.8.4.-) (ERO1-Lalpha) (Oxidoreductin-1-Lalpha) (Endoplasmic oxidoreductin-1-like protein) (ERO1-L)                                  | ERO1A_HUMAN | 54377 | 100% | 11 | 12 | 22 | 29.70% |
| TPC1-p15 | (Q96HE7) ERO1-like protein alpha precursor (EC 1.8.4.-) (ERO1-Lalpha) (Oxidoreductin-1-Lalpha) (Endoplasmic oxidoreductin-1-like protein) (ERO1-L)                                  | ERO1A_HUMAN | 54377 | 100% | 4  | 4  | 9  | 14.70% |
| TPC1-p15 | (Q96HE7) ERO1-like protein alpha precursor (EC 1.8.4.-) (ERO1-Lalpha) (Oxidoreductin-1-Lalpha) (Endoplasmic oxidoreductin-1-like protein) (ERO1-L)                                  | ERO1A_HUMAN | 54377 | 100% | 2  | 4  | 6  | 2.56%  |
| TPC1-p15 | (Q96HE7) ERO1-like protein alpha precursor (EC 1.8.4.-) (ERO1-Lalpha) (Oxidoreductin-1-Lalpha) (Endoplasmic oxidoreductin-1-like protein) (ERO1-L)                                  | ERO1A_HUMAN | 54377 | 100% | 2  | 3  | 4  | 2.56%  |

## Protein Identified Sequence Coverage in TPC-1

|          |                                                                                                                                                                                                                  |             |       |      |   |   |    |        |
|----------|------------------------------------------------------------------------------------------------------------------------------------------------------------------------------------------------------------------|-------------|-------|------|---|---|----|--------|
| TPC1-p15 | (Q96HE7) ERO1-like protein alpha precursor (EC 1.8.4.-) (ERO1-Lalpha) (Oxidoreductin-1-Lalpha) (Endoplasmic oxidoreductin-1-like protein) (ERO1-L)                                                               | ERO1A_HUMAN | 54377 | 100% | 2 | 2 | 3  | 2.56%  |
| TPC1-p15 | (Q96HE7) ERO1-like protein alpha precursor (EC 1.8.4.-) (ERO1-Lalpha) (Oxidoreductin-1-Lalpha) (Endoplasmic oxidoreductin-1-like protein) (ERO1-L)                                                               | ERO1A_HUMAN | 54377 | 100% | 6 | 6 | 9  | 15.80% |
| TPC1-p15 | (Q96HE7) ERO1-like protein alpha precursor (EC 1.8.4.-) (ERO1-Lalpha) (Oxidoreductin-1-Lalpha) (Endoplasmic oxidoreductin-1-like protein) (ERO1-L)                                                               | ERO1A_HUMAN | 54377 | 100% | 4 | 7 | 23 | 17.30% |
| TPC1-p15 | (Q96HE7) ERO1-like protein alpha precursor (EC 1.8.4.-) (ERO1-Lalpha) (Oxidoreductin-1-Lalpha) (Endoplasmic oxidoreductin-1-like protein) (ERO1-L)                                                               | ERO1A_HUMAN | 54377 | 100% | 2 | 2 | 2  | 8.97%  |
| TPC1-p15 | (Q96HE7) ERO1-like protein alpha precursor (EC 1.8.4.-) (ERO1-Lalpha) (Oxidoreductin-1-Lalpha) (Endoplasmic oxidoreductin-1-like protein) (ERO1-L)                                                               | ERO1A_HUMAN | 54377 | 100% | 2 | 2 | 4  | 8.97%  |
| TPC1-p15 | (Q96HE7) ERO1-like protein alpha precursor (EC 1.8.4.-) (ERO1-Lalpha) (Oxidoreductin-1-Lalpha) (Endoplasmic oxidoreductin-1-like protein) (ERO1-L)                                                               | ERO1A_HUMAN | 54377 | 100% | 3 | 4 | 9  | 10.90% |
| TPC1-p15 | (Q96HE7) ERO1-like protein alpha precursor (EC 1.8.4.-) (ERO1-Lalpha) (Oxidoreductin-1-Lalpha) (Endoplasmic oxidoreductin-1-like protein) (ERO1-L)                                                               | ERO1A_HUMAN | 54377 | 100% | 4 | 6 | 12 | 13.70% |
| TPC1-p15 | (Q96PD2) Discoidin, CUB and LCCL domain-containing protein 2 precursor (Endothelial and smooth muscle cell-derived neuropilin-like protein) (CUB, LCCL and coagulation factor V/VIII-homology domains protein 1) | DCBD2_HUMAN | 85018 | 100% | 4 | 5 | 5  | 11.00% |
| TPC1-p15 | (Q99519) Sialidase-1 precursor (EC 3.2.1.18) (Lysosomal sialidase) (N-acetyl-alpha-neuraminidase 1) (Acetylneuraminyl hydrolase) (G9 sialidase)                                                                  | NEUR1_HUMAN | 45449 | 100% | 4 | 5 | 8  | 12.00% |
| TPC1-p15 | (Q99519) Sialidase-1 precursor (EC 3.2.1.18) (Lysosomal sialidase) (N-acetyl-alpha-neuraminidase 1) (Acetylneuraminyl hydrolase) (G9 sialidase)                                                                  | NEUR1_HUMAN | 45449 | 100% | 6 | 6 | 10 | 24.30% |
| TPC1-p15 | (Q99519) Sialidase-1 precursor (EC 3.2.1.18) (Lysosomal sialidase) (N-acetyl-alpha-neuraminidase 1) (Acetylneuraminyl hydrolase) (G9 sialidase)                                                                  | NEUR1_HUMAN | 45449 | 100% | 3 | 3 | 4  | 13.70% |
| TPC1-p15 | (Q99519) Sialidase-1 precursor (EC 3.2.1.18) (Lysosomal sialidase) (N-acetyl-alpha-neuraminidase 1) (Acetylneuraminyl hydrolase) (G9 sialidase)                                                                  | NEUR1_HUMAN | 45449 | 100% | 6 | 6 | 9  | 17.60% |



## Protein Identified Sequence Coverage in TPC-1

|          |                                                                                                                                                                                                                                                              |             |        |      |   |   |   |        |
|----------|--------------------------------------------------------------------------------------------------------------------------------------------------------------------------------------------------------------------------------------------------------------|-------------|--------|------|---|---|---|--------|
| TPC1-p15 | (Q99519) Sialidase-1 precursor (EC 3.2.1.18)<br>(Lysosomal sialidase) (N-acetyl-alpha-neuraminidase<br>1) (Acetylneuraminyl hydrolase) (G9 sialidase)                                                                                                        | NEUR1_HUMAN | 45449  | 100% | 3 | 3 | 3 | 9.16%  |
| TPC1-p15 | (Q99519) Sialidase-1 precursor (EC 3.2.1.18)<br>(Lysosomal sialidase) (N-acetyl-alpha-neuraminidase<br>1) (Acetylneuraminyl hydrolase) (G9 sialidase)                                                                                                        | NEUR1_HUMAN | 45449  | 100% | 2 | 3 | 3 | 12.50% |
| TPC1-p15 | (Q99519) Sialidase-1 precursor (EC 3.2.1.18)<br>(Lysosomal sialidase) (N-acetyl-alpha-neuraminidase<br>1) (Acetylneuraminyl hydrolase) (G9 sialidase)                                                                                                        | NEUR1_HUMAN | 45449  | 100% | 3 | 3 | 4 | 21.70% |
| TPC1-p15 | (Q99538) Legumain precursor (EC 3.4.22.34)<br>(Asparaginyl endopeptidase) (Protease, cysteine 1)                                                                                                                                                             | LGMN_HUMAN  | 49393  | 100% | 2 | 2 | 4 | 7.16%  |
| TPC1-p15 | (Q99538) Legumain precursor (EC 3.4.22.34)<br>(Asparaginyl endopeptidase) (Protease, cysteine 1)                                                                                                                                                             | LGMN_HUMAN  | 49393  | 100% | 2 | 2 | 3 | 7.16%  |
| TPC1-p15 | (Q99715) Collagen alpha-1(XII) chain precursor                                                                                                                                                                                                               | COCA1_HUMAN | 333174 | 100% | 3 | 3 | 3 | 2.61%  |
| TPC1-p15 | (Q9GZM7) Tubulointerstitial nephritis antigen-like<br>precursor (Tubulointerstitial nephritis antigen-related<br>protein) (TIN Ag-related protein) (TIN-Ag-RP)<br>(Glucocorticoid-inducible protein 5) (Oxidized LDL-<br>responsive gene 2 protein) (OLRG-2) | TINAL_HUMAN | 52369  | 100% | 2 | 2 | 2 | 6.21%  |
| TPC1-p15 | (Q9GZM7) Tubulointerstitial nephritis antigen-like<br>precursor (Tubulointerstitial nephritis antigen-related<br>protein) (TIN Ag-related protein) (TIN-Ag-RP)<br>(Glucocorticoid-inducible protein 5) (Oxidized LDL-<br>responsive gene 2 protein) (OLRG-2) | TINAL_HUMAN | 52369  | 100% | 2 | 2 | 3 | 10.30% |
| TPC1-p15 | (Q9HAT2) Sialate O-acetylcylase precursor (EC<br>3.1.1.53) (Sialic acid-specific 9-O-acetylcylase) (H-<br>Lse)                                                                                                                                               | SIAE_HUMAN  | 58297  | 100% | 5 | 5 | 6 | 12.00% |
| TPC1-p15 | (Q9HAT2) Sialate O-acetylcylase precursor (EC<br>3.1.1.53) (Sialic acid-specific 9-O-acetylcylase) (H-<br>Lse)                                                                                                                                               | SIAE_HUMAN  | 58297  | 100% | 3 | 3 | 5 | 8.03%  |
| TPC1-p15 | (Q9HAT2) Sialate O-acetylcylase precursor (EC<br>3.1.1.53) (Sialic acid-specific 9-O-acetylcylase) (H-<br>Lse)                                                                                                                                               | SIAE_HUMAN  | 58297  | 100% | 4 | 5 | 5 | 12.60% |
| TPC1-p15 | (Q9HAT2) Sialate O-acetylcylase precursor (EC<br>3.1.1.53) (Sialic acid-specific 9-O-acetylcylase) (H-<br>Lse)                                                                                                                                               | SIAE_HUMAN  | 58297  | 100% | 5 | 6 | 9 | 15.90% |
| TPC1-p15 | (Q9HAT2) Sialate O-acetylcylase precursor (EC<br>3.1.1.53) (Sialic acid-specific 9-O-acetylcylase) (H-<br>Lse)                                                                                                                                               | SIAE_HUMAN  | 58297  | 100% | 4 | 6 | 9 | 10.10% |
| TPC1-p15 | (Q9HAT2) Sialate O-acetylcylase precursor (EC<br>3.1.1.53) (Sialic acid-specific 9-O-acetylcylase) (H-<br>Lse)                                                                                                                                               | SIAE_HUMAN  | 58297  | 100% | 3 | 4 | 7 | 8.03%  |

## Protein Identified Sequence Coverage in TPC-1

|          |                                                                                                                                                                                      |            |        |      |   |   |    |        |
|----------|--------------------------------------------------------------------------------------------------------------------------------------------------------------------------------------|------------|--------|------|---|---|----|--------|
| TPC1-p15 | (Q9HAT2) Sialate O-acetyltransferase precursor (EC 3.1.1.53) (Sialic acid-specific 9-O-acetyltransferase) (H-Lse)                                                                    | SIAE_HUMAN | 58297  | 100% | 3 | 4 | 16 | 6.50%  |
| TPC1-p15 | (Q9HAT2) Sialate O-acetyltransferase precursor (EC 3.1.1.53) (Sialic acid-specific 9-O-acetyltransferase) (H-Lse)                                                                    | SIAE_HUMAN | 58297  | 100% | 2 | 2 | 4  | 8.41%  |
| TPC1-p15 | (Q9HB40) Retinoid-inducible serine carboxypeptidase precursor (EC 3.4.16.-) (Serine carboxypeptidase 1)                                                                              | RISC_HUMAN | 50814  | 100% | 2 | 2 | 7  | 6.86%  |
| TPC1-p15 | (Q9NQC3) Reticulon-4 (Neurite outgrowth inhibitor) (Nogo protein) (Foocen) (Neuroendocrine-specific protein) (NSP) (Neuroendocrine-specific protein C homolog) (RTN-x) (Reticulon-5) | RTN4_HUMAN | 129917 | 100% | 2 | 2 | 2  | 3.94%  |
| TPC1-p15 | (Q9NQC3) Reticulon-4 (Neurite outgrowth inhibitor) (Nogo protein) (Foocen) (Neuroendocrine-specific protein) (NSP) (Neuroendocrine-specific protein C homolog) (RTN-x) (Reticulon-5) | RTN4_HUMAN | 129917 | 100% | 3 | 3 | 4  | 5.20%  |
| TPC1-p15 | (Q9NQC3) Reticulon-4 (Neurite outgrowth inhibitor) (Nogo protein) (Foocen) (Neuroendocrine-specific protein) (NSP) (Neuroendocrine-specific protein C homolog) (RTN-x) (Reticulon-5) | RTN4_HUMAN | 129917 | 100% | 4 | 5 | 5  | 6.29%  |
| TPC1-p15 | (Q9UBG0) Macrophage mannose receptor 2 precursor (Urokinase receptor-associated protein) (Endocytic receptor 180) (CD280 antigen)                                                    | MRC2_HUMAN | 166637 | 100% | 7 | 7 | 9  | 10.20% |
| TPC1-p15 | (Q9UBG0) Macrophage mannose receptor 2 precursor (Urokinase receptor-associated protein) (Endocytic receptor 180) (CD280 antigen)                                                    | MRC2_HUMAN | 166637 | 100% | 4 | 4 | 6  | 6.22%  |
| TPC1-p15 | (Q9UBG0) Macrophage mannose receptor 2 precursor (Urokinase receptor-associated protein) (Endocytic receptor 180) (CD280 antigen)                                                    | MRC2_HUMAN | 166637 | 100% | 7 | 7 | 7  | 9.40%  |
| TPC1-p15 | (Q9UBG0) Macrophage mannose receptor 2 precursor (Urokinase receptor-associated protein) (Endocytic receptor 180) (CD280 antigen)                                                    | MRC2_HUMAN | 166637 | 100% | 3 | 3 | 6  | 2.91%  |
| TPC1-p15 | (Q9UBG0) Macrophage mannose receptor 2 precursor (Urokinase receptor-associated protein) (Endocytic receptor 180) (CD280 antigen)                                                    | MRC2_HUMAN | 166637 | 100% | 6 | 6 | 9  | 9.06%  |
| TPC1-p15 | (Q9UBG0) Macrophage mannose receptor 2 precursor (Urokinase receptor-associated protein) (Endocytic receptor 180) (CD280 antigen)                                                    | MRC2_HUMAN | 166637 | 100% | 3 | 3 | 3  | 3.85%  |

## Protein Identified Sequence Coverage in TPC-1

|          |                                                                                                                                   |            |        |      |   |    |    |        |
|----------|-----------------------------------------------------------------------------------------------------------------------------------|------------|--------|------|---|----|----|--------|
| TPC1-p15 | (Q9UBG0) Macrophage mannose receptor 2 precursor (Urokinase receptor-associated protein) (Endocytic receptor 180) (CD280 antigen) | MRC2_HUMAN | 166637 | 100% | 4 | 4  | 9  | 4.67%  |
| TPC1-p15 | (Q9UBG0) Macrophage mannose receptor 2 precursor (Urokinase receptor-associated protein) (Endocytic receptor 180) (CD280 antigen) | MRC2_HUMAN | 166637 | 100% | 3 | 3  | 5  | 2.70%  |
| TPC1-p15 | (Q9UBG0) Macrophage mannose receptor 2 precursor (Urokinase receptor-associated protein) (Endocytic receptor 180) (CD280 antigen) | MRC2_HUMAN | 166637 | 100% | 3 | 3  | 3  | 4.12%  |
| TPC1-p15 | (Q9UBG0) Macrophage mannose receptor 2 precursor (Urokinase receptor-associated protein) (Endocytic receptor 180) (CD280 antigen) | MRC2_HUMAN | 166637 | 100% | 5 | 5  | 6  | 5.81%  |
| TPC1-p15 | (Q9UBG0) Macrophage mannose receptor 2 precursor (Urokinase receptor-associated protein) (Endocytic receptor 180) (CD280 antigen) | MRC2_HUMAN | 166637 | 100% | 2 | 2  | 5  | 4.26%  |
| TPC1-p15 | (Q9UBG0) Macrophage mannose receptor 2 precursor (Urokinase receptor-associated protein) (Endocytic receptor 180) (CD280 antigen) | MRC2_HUMAN | 166637 | 100% | 3 | 3  | 4  | 5.61%  |
| TPC1-p15 | (Q9UBR2) Cathepsin Z precursor (EC 3.4.22.-) (Cathepsin X) (Cathepsin P)                                                          | CATZ_HUMAN | 33850  | 100% | 8 | 10 | 37 | 41.30% |
| TPC1-p15 | (Q9UBR2) Cathepsin Z precursor (EC 3.4.22.-) (Cathepsin X) (Cathepsin P)                                                          | CATZ_HUMAN | 33850  | 100% | 9 | 11 | 33 | 36.30% |
| TPC1-p15 | (Q9UBR2) Cathepsin Z precursor (EC 3.4.22.-) (Cathepsin X) (Cathepsin P)                                                          | CATZ_HUMAN | 33850  | 100% | 7 | 8  | 26 | 33.00% |
| TPC1-p15 | (Q9UBR2) Cathepsin Z precursor (EC 3.4.22.-) (Cathepsin X) (Cathepsin P)                                                          | CATZ_HUMAN | 33850  | 100% | 9 | 9  | 44 | 36.30% |
| TPC1-p15 | (Q9UBR2) Cathepsin Z precursor (EC 3.4.22.-) (Cathepsin X) (Cathepsin P)                                                          | CATZ_HUMAN | 33850  | 100% | 3 | 3  | 19 | 19.80% |
| TPC1-p15 | (Q9UBR2) Cathepsin Z precursor (EC 3.4.22.-) (Cathepsin X) (Cathepsin P)                                                          | CATZ_HUMAN | 33850  | 100% | 4 | 4  | 4  | 29.00% |
| TPC1-p15 | (Q9UBR2) Cathepsin Z precursor (EC 3.4.22.-) (Cathepsin X) (Cathepsin P)                                                          | CATZ_HUMAN | 33850  | 100% | 2 | 2  | 2  | 8.91%  |
| TPC1-p15 | (Q9UBR2) Cathepsin Z precursor (EC 3.4.22.-) (Cathepsin X) (Cathepsin P)                                                          | CATZ_HUMAN | 33850  | 100% | 4 | 5  | 36 | 19.10% |
| TPC1-p15 | (Q9UBR2) Cathepsin Z precursor (EC 3.4.22.-) (Cathepsin X) (Cathepsin P)                                                          | CATZ_HUMAN | 33850  | 100% | 3 | 3  | 12 | 24.40% |
| TPC1-p15 | (Q9UBR2) Cathepsin Z precursor (EC 3.4.22.-) (Cathepsin X) (Cathepsin P)                                                          | CATZ_HUMAN | 33850  | 100% | 4 | 5  | 68 | 19.10% |
| TPC1-p15 | (Q9UBR2) Cathepsin Z precursor (EC 3.4.22.-) (Cathepsin X) (Cathepsin P)                                                          | CATZ_HUMAN | 33850  | 100% | 3 | 3  | 10 | 18.20% |
| TPC1-p15 | (Q9UBR2) Cathepsin Z precursor (EC 3.4.22.-) (Cathepsin X) (Cathepsin P)                                                          | CATZ_HUMAN | 33850  | 100% | 2 | 2  | 9  | 24.10% |

## Protein Identified Sequence Coverage in TPC-1

|          |                                                                                                                                                                                         |             |       |      |    |    |    |        |
|----------|-----------------------------------------------------------------------------------------------------------------------------------------------------------------------------------------|-------------|-------|------|----|----|----|--------|
| TPC1-p15 | (Q9UHG3) Prenylcysteine oxidase precursor (EC 1.8.3.5) (PCL1)                                                                                                                           | PCYOX_HUMAN | 56595 | 100% | 6  | 6  | 9  | 21.60% |
| TPC1-p15 | (Q9UHG3) Prenylcysteine oxidase precursor (EC 1.8.3.5) (PCL1)                                                                                                                           | PCYOX_HUMAN | 56595 | 100% | 5  | 5  | 9  | 13.30% |
| TPC1-p15 | (Q9UHG3) Prenylcysteine oxidase precursor (EC 1.8.3.5) (PCL1)                                                                                                                           | PCYOX_HUMAN | 56595 | 100% | 3  | 3  | 3  | 8.51%  |
| TPC1-p15 | (Q9UHG3) Prenylcysteine oxidase precursor (EC 1.8.3.5) (PCL1)                                                                                                                           | PCYOX_HUMAN | 56595 | 100% | 6  | 6  | 11 | 14.90% |
| TPC1-p15 | (Q9UHG3) Prenylcysteine oxidase precursor (EC 1.8.3.5) (PCL1)                                                                                                                           | PCYOX_HUMAN | 56595 | 100% | 2  | 3  | 5  | 6.14%  |
| TPC1-p15 | (Q9UHG3) Prenylcysteine oxidase precursor (EC 1.8.3.5) (PCL1)                                                                                                                           | PCYOX_HUMAN | 56595 | 100% | 2  | 3  | 5  | 6.14%  |
| TPC1-p15 | (Q9UHG3) Prenylcysteine oxidase precursor (EC 1.8.3.5) (PCL1)                                                                                                                           | PCYOX_HUMAN | 56595 | 100% | 2  | 2  | 4  | 6.14%  |
| TPC1-p15 | (Q9UHG3) Prenylcysteine oxidase precursor (EC 1.8.3.5) (PCL1)                                                                                                                           | PCYOX_HUMAN | 56595 | 100% | 4  | 4  | 4  | 13.50% |
| TPC1-p15 | (Q9UHG3) Prenylcysteine oxidase precursor (EC 1.8.3.5) (PCL1)                                                                                                                           | PCYOX_HUMAN | 56595 | 100% | 5  | 5  | 11 | 16.40% |
| TPC1-p15 | (Q9UHG3) Prenylcysteine oxidase precursor (EC 1.8.3.5) (PCL1)                                                                                                                           | PCYOX_HUMAN | 56595 | 100% | 2  | 2  | 2  | 6.53%  |
| TPC1-p15 | (Q9UHL4) Dipeptidyl-peptidase 2 precursor (EC 3.4.14.2) (Dipeptidyl-peptidase II) (DPP II) (Dipeptidyl aminopeptidase II) (Quiescent cell proline dipeptidase) (Dipeptidyl peptidase 7) | DPP2_HUMAN  | 54311 | 100% | 12 | 14 | 27 | 39.60% |
| TPC1-p15 | (Q9UHL4) Dipeptidyl-peptidase 2 precursor (EC 3.4.14.2) (Dipeptidyl-peptidase II) (DPP II) (Dipeptidyl aminopeptidase II) (Quiescent cell proline dipeptidase) (Dipeptidyl peptidase 7) | DPP2_HUMAN  | 54311 | 100% | 12 | 14 | 28 | 40.90% |
| TPC1-p15 | (Q9UHL4) Dipeptidyl-peptidase 2 precursor (EC 3.4.14.2) (Dipeptidyl-peptidase II) (DPP II) (Dipeptidyl aminopeptidase II) (Quiescent cell proline dipeptidase) (Dipeptidyl peptidase 7) | DPP2_HUMAN  | 54311 | 100% | 10 | 11 | 17 | 31.30% |
| TPC1-p15 | (Q9UHL4) Dipeptidyl-peptidase 2 precursor (EC 3.4.14.2) (Dipeptidyl-peptidase II) (DPP II) (Dipeptidyl aminopeptidase II) (Quiescent cell proline dipeptidase) (Dipeptidyl peptidase 7) | DPP2_HUMAN  | 54311 | 100% | 9  | 9  | 19 | 26.80% |
| TPC1-p15 | (Q9UHL4) Dipeptidyl-peptidase 2 precursor (EC 3.4.14.2) (Dipeptidyl-peptidase II) (DPP II) (Dipeptidyl aminopeptidase II) (Quiescent cell proline dipeptidase) (Dipeptidyl peptidase 7) | DPP2_HUMAN  | 54311 | 100% | 3  | 3  | 7  | 13.40% |
| TPC1-p15 | (Q9UHL4) Dipeptidyl-peptidase 2 precursor (EC 3.4.14.2) (Dipeptidyl-peptidase II) (DPP II) (Dipeptidyl aminopeptidase II) (Quiescent cell proline dipeptidase) (Dipeptidyl peptidase 7) | DPP2_HUMAN  | 54311 | 100% | 2  | 2  | 2  | 5.89%  |
| TPC1-p15 | (Q9UHL4) Dipeptidyl-peptidase 2 precursor (EC 3.4.14.2) (Dipeptidyl-peptidase II) (DPP II) (Dipeptidyl aminopeptidase II) (Quiescent cell proline dipeptidase) (Dipeptidyl peptidase 7) | DPP2_HUMAN  | 54311 | 100% | 7  | 7  | 23 | 24.00% |

## Protein Identified Sequence Coverage in TPC-1

|          |                                                                                                                                                                                                            |             |       |      |   |   |    |        |
|----------|------------------------------------------------------------------------------------------------------------------------------------------------------------------------------------------------------------|-------------|-------|------|---|---|----|--------|
| TPC1-p15 | (Q9UHL4) Dipeptidyl-peptidase 2 precursor (EC 3.4.14.2) (Dipeptidyl-peptidase II) (DPP II) (Dipeptidyl aminopeptidase II) (Quiescent cell proline dipeptidase) (Dipeptidyl peptidase 7)                    | DPP2_HUMAN  | 54311 | 100% | 3 | 4 | 12 | 14.60% |
| TPC1-p15 | (Q9UHL4) Dipeptidyl-peptidase 2 precursor (EC 3.4.14.2) (Dipeptidyl-peptidase II) (DPP II) (Dipeptidyl aminopeptidase II) (Quiescent cell proline dipeptidase) (Dipeptidyl peptidase 7)                    | DPP2_HUMAN  | 54311 | 100% | 4 | 6 | 20 | 16.90% |
| TPC1-p15 | (Q9UHL4) Dipeptidyl-peptidase 2 precursor (EC 3.4.14.2) (Dipeptidyl-peptidase II) (DPP II) (Dipeptidyl aminopeptidase II) (Quiescent cell proline dipeptidase) (Dipeptidyl peptidase 7)                    | DPP2_HUMAN  | 54311 | 100% | 2 | 3 | 9  | 9.76%  |
| TPC1-p15 | (Q9UHL4) Dipeptidyl-peptidase 2 precursor (EC 3.4.14.2) (Dipeptidyl-peptidase II) (DPP II) (Dipeptidyl aminopeptidase II) (Quiescent cell proline dipeptidase) (Dipeptidyl peptidase 7)                    | DPP2_HUMAN  | 54311 | 100% | 3 | 5 | 6  | 14.20% |
| TPC1-p15 | (Q9UHL4) Dipeptidyl-peptidase 2 precursor (EC 3.4.14.2) (Dipeptidyl-peptidase II) (DPP II) (Dipeptidyl aminopeptidase II) (Quiescent cell proline dipeptidase) (Dipeptidyl peptidase 7)                    | DPP2_HUMAN  | 54311 | 100% | 2 | 3 | 10 | 8.74%  |
| TPC1-p15 | (Q9UIJ7) GTP:AMP phosphotransferase mitochondrial (EC 2.7.4.10) (Adenylate kinase 3) (AK3) (Adenylate kinase 3 alpha-like 1)                                                                               | KAD3_HUMAN  | 25417 | 100% | 3 | 3 | 4  | 17.30% |
| TPC1-p15 | (Q9UIJ7) GTP:AMP phosphotransferase mitochondrial (EC 2.7.4.10) (Adenylate kinase 3) (AK3) (Adenylate kinase 3 alpha-like 1)                                                                               | KAD3_HUMAN  | 25417 | 100% | 3 | 3 | 4  | 17.30% |
| TPC1-p15 | (Q9UIJ7) GTP:AMP phosphotransferase mitochondrial (EC 2.7.4.10) (Adenylate kinase 3) (AK3) (Adenylate kinase 3 alpha-like 1)                                                                               | KAD3_HUMAN  | 25417 | 100% | 2 | 2 | 2  | 10.60% |
| TPC1-p15 | (Q9UIJ7) GTP:AMP phosphotransferase mitochondrial (EC 2.7.4.10) (Adenylate kinase 3) (AK3) (Adenylate kinase 3 alpha-like 1)                                                                               | KAD3_HUMAN  | 25417 | 100% | 2 | 2 | 4  | 12.80% |
| TPC1-p15 | (Q9UL46) Proteasome activator complex subunit 2 (Proteasome activator 28-beta subunit) (PA28beta) (PA28b) (Activator of multicatalytic protease subunit 2) (11S regulator complex beta subunit) (REG-beta) | PSME2_HUMAN | 27213 | 100% | 2 | 2 | 4  | 12.20% |
| TPC1-p15 | (Q9UL46) Proteasome activator complex subunit 2 (Proteasome activator 28-beta subunit) (PA28beta) (PA28b) (Activator of multicatalytic protease subunit 2) (11S regulator complex beta subunit) (REG-beta) | PSME2_HUMAN | 27213 | 100% | 3 | 3 | 3  | 21.40% |
| TPC1-p15 | (Q9UL46) Proteasome activator complex subunit 2 (Proteasome activator 28-beta subunit) (PA28beta) (PA28b) (Activator of multicatalytic protease subunit 2) (11S regulator complex beta subunit) (REG-beta) | PSME2_HUMAN | 27213 | 100% | 2 | 3 | 3  | 12.20% |

## Protein Identified Sequence Coverage in TPC-1

|          |                                                                                                                                                                                                            |             |       |      |   |   |   |        |
|----------|------------------------------------------------------------------------------------------------------------------------------------------------------------------------------------------------------------|-------------|-------|------|---|---|---|--------|
| TPC1-p15 | (Q9UL46) Proteasome activator complex subunit 2 (Proteasome activator 28-beta subunit) (PA28beta) (PA28b) (Activator of multicatalytic protease subunit 2) (11S regulator complex beta subunit) (REG-beta) | PSME2_HUMAN | 27213 | 100% | 2 | 2 | 3 | 14.70% |
| TPC1-p15 | (Q9UL46) Proteasome activator complex subunit 2 (Proteasome activator 28-beta subunit) (PA28beta) (PA28b) (Activator of multicatalytic protease subunit 2) (11S regulator complex beta subunit) (REG-beta) | PSME2_HUMAN | 27213 | 100% | 2 | 3 | 5 | 14.70% |
| TPC1-p15 | (Q9UM22) Mammalian endymin-related protein 1 precursor (MERP-1) (UCC1 protein)                                                                                                                             | EPDR1_HUMAN | 25420 | 100% | 5 | 5 | 8 | 23.70% |
| TPC1-p15 | (Q9UM22) Mammalian endymin-related protein 1 precursor (MERP-1) (UCC1 protein)                                                                                                                             | EPDR1_HUMAN | 25420 | 100% | 4 | 4 | 8 | 19.60% |
| TPC1-p15 | (Q9UM22) Mammalian endymin-related protein 1 precursor (MERP-1) (UCC1 protein)                                                                                                                             | EPDR1_HUMAN | 25420 | 100% | 3 | 3 | 3 | 14.30% |
| TPC1-p15 | (Q9UM22) Mammalian endymin-related protein 1 precursor (MERP-1) (UCC1 protein)                                                                                                                             | EPDR1_HUMAN | 25420 | 100% | 4 | 4 | 8 | 18.30% |
| TPC1-p15 | (Q9UM22) Mammalian endymin-related protein 1 precursor (MERP-1) (UCC1 protein)                                                                                                                             | EPDR1_HUMAN | 25420 | 100% | 3 | 3 | 5 | 28.10% |
| TPC1-p15 | (Q9UM22) Mammalian endymin-related protein 1 precursor (MERP-1) (UCC1 protein)                                                                                                                             | EPDR1_HUMAN | 25420 | 100% | 3 | 3 | 6 | 28.10% |
| TPC1-p15 | (Q9UM22) Mammalian endymin-related protein 1 precursor (MERP-1) (UCC1 protein)                                                                                                                             | EPDR1_HUMAN | 25420 | 100% | 2 | 2 | 7 | 10.30% |
| TPC1-p15 | (Q9UM22) Mammalian endymin-related protein 1 precursor (MERP-1) (UCC1 protein)                                                                                                                             | EPDR1_HUMAN | 25420 | 100% | 2 | 2 | 3 | 10.30% |
| TPC1-p15 | (Q9UM22) Mammalian endymin-related protein 1 precursor (MERP-1) (UCC1 protein)                                                                                                                             | EPDR1_HUMAN | 25420 | 100% | 2 | 2 | 4 | 10.30% |
| TPC1-p15 | (Q9UM22) Mammalian endymin-related protein 1 precursor (MERP-1) (UCC1 protein)                                                                                                                             | EPDR1_HUMAN | 25420 | 100% | 3 | 3 | 7 | 13.40% |
| TPC1-p15 | (Q9UMR5) Palmitoyl-protein thioesterase 2 precursor (EC 3.1.2.22) (Palmitoyl-protein hydrolase 2) (PPT-2) (G14)                                                                                            | PPT2_HUMAN  | 34291 | 100% | 2 | 2 | 4 | 12.90% |
| TPC1-p15 | (Q9UMR5) Palmitoyl-protein thioesterase 2 precursor (EC 3.1.2.22) (Palmitoyl-protein hydrolase 2) (PPT-2) (G14)                                                                                            | PPT2_HUMAN  | 34291 | 100% | 2 | 3 | 4 | 12.90% |
| TPC1-p15 | (Q9UMR5) Palmitoyl-protein thioesterase 2 precursor (EC 3.1.2.22) (Palmitoyl-protein hydrolase 2) (PPT-2) (G14)                                                                                            | PPT2_HUMAN  | 34291 | 100% | 3 | 4 | 7 | 15.90% |
| TPC1-p15 | (Q9UMR5) Palmitoyl-protein thioesterase 2 precursor (EC 3.1.2.22) (Palmitoyl-protein hydrolase 2) (PPT-2) (G14)                                                                                            | PPT2_HUMAN  | 34291 | 100% | 2 | 3 | 6 | 10.60% |
| TPC1-p15 | (Q9UNW1) Multiple inositol polyphosphate phosphatase 1 precursor (EC 3.1.3.62) (Inositol (1,3,4,5)-tetrakisphosphate 3-phosphatase) (Ins(1,3,4,5)P(4) 3-phosphatase)                                       | MINP1_HUMAN | 55035 | 100% | 2 | 2 | 3 | 5.95%  |

## Protein Identified Sequence Coverage in TPC-1

|          |                                                                                                                                                                      |             |        |      |    |    |    |        |
|----------|----------------------------------------------------------------------------------------------------------------------------------------------------------------------|-------------|--------|------|----|----|----|--------|
| TPC1-p15 | (Q9UNW1) Multiple inositol polyphosphate phosphatase 1 precursor (EC 3.1.3.62) (Inositol (1,3,4,5)-tetrakisphosphate 3-phosphatase) (Ins(1,3,4,5)P(4) 3-phosphatase) | MINP1_HUMAN | 55035  | 100% | 4  | 4  | 4  | 12.70% |
| TPC1-p15 | (Q9UNW1) Multiple inositol polyphosphate phosphatase 1 precursor (EC 3.1.3.62) (Inositol (1,3,4,5)-tetrakisphosphate 3-phosphatase) (Ins(1,3,4,5)P(4) 3-phosphatase) | MINP1_HUMAN | 55035  | 100% | 2  | 2  | 2  | 5.95%  |
| TPC1-p15 | (Q9Y2B0) MIR-interacting saposin-like protein precursor (Transmembrane protein 4) (Putative secreted protein ZSIG9)                                                  | MSAP_HUMAN  | 20635  | 100% | 4  | 4  | 7  | 33.00% |
| TPC1-p15 | (Q9Y2B0) MIR-interacting saposin-like protein precursor (Transmembrane protein 4) (Putative secreted protein ZSIG9)                                                  | MSAP_HUMAN  | 20635  | 100% | 2  | 3  | 4  | 15.90% |
| TPC1-p15 | (Q9Y2E5) Epididymis-specific alpha-mannosidase precursor (EC 3.2.1.24) (Mannosidase alpha class 2B member 2)                                                         | MA2B2_HUMAN | 113870 | 100% | 3  | 3  | 5  | 5.25%  |
| TPC1-p15 | (Q9Y2E5) Epididymis-specific alpha-mannosidase precursor (EC 3.2.1.24) (Mannosidase alpha class 2B member 2)                                                         | MA2B2_HUMAN | 113870 | 100% | 3  | 3  | 3  | 3.87%  |
| TPC1-p15 | (Q9Y2E5) Epididymis-specific alpha-mannosidase precursor (EC 3.2.1.24) (Mannosidase alpha class 2B member 2)                                                         | MA2B2_HUMAN | 113870 | 100% | 2  | 2  | 2  | 2.58%  |
| TPC1-p15 | (Q9Y2E5) Epididymis-specific alpha-mannosidase precursor (EC 3.2.1.24) (Mannosidase alpha class 2B member 2)                                                         | MA2B2_HUMAN | 113870 | 100% | 3  | 4  | 7  | 7.33%  |
| TPC1-p15 | (Q9Y2E5) Epididymis-specific alpha-mannosidase precursor (EC 3.2.1.24) (Mannosidase alpha class 2B member 2)                                                         | MA2B2_HUMAN | 113870 | 100% | 3  | 4  | 6  | 7.33%  |
| TPC1-p15 | (Q9Y2E5) Epididymis-specific alpha-mannosidase precursor (EC 3.2.1.24) (Mannosidase alpha class 2B member 2)                                                         | MA2B2_HUMAN | 113870 | 100% | 3  | 4  | 11 | 4.86%  |
| TPC1-p15 | (Q9Y2E5) Epididymis-specific alpha-mannosidase precursor (EC 3.2.1.24) (Mannosidase alpha class 2B member 2)                                                         | MA2B2_HUMAN | 113870 | 100% | 2  | 3  | 7  | 3.87%  |
| TPC1-p15 | (Q9Y3R0) Glutamate receptor-interacting protein 1 (GRIP1 protein)                                                                                                    | GRIP1_HUMAN | 122408 | 100% | 2  | 2  | 2  | 3.10%  |
| TPC1-p15 | (Q9Y490) Talin-1                                                                                                                                                     | TLN1_HUMAN  | 269747 | 100% | 3  | 4  | 4  | 2.60%  |
| TPC1-p15 | (Q9Y490) Talin-1                                                                                                                                                     | TLN1_HUMAN  | 269747 | 100% | 2  | 2  | 2  | 2.01%  |
| TPC1-p15 | (Q9Y4L1) 150 kDa oxygen-regulated protein precursor (Orp150) (Hypoxia up-regulated 1)                                                                                | OXP_HUMAN   | 111319 | 100% | 11 | 11 | 15 | 19.90% |
| TPC1-p15 | (Q9Y4L1) 150 kDa oxygen-regulated protein precursor (Orp150) (Hypoxia up-regulated 1)                                                                                | OXP_HUMAN   | 111319 | 100% | 7  | 7  | 10 | 12.30% |
| TPC1-p15 | (Q9Y4L1) 150 kDa oxygen-regulated protein precursor (Orp150) (Hypoxia up-regulated 1)                                                                                | OXP_HUMAN   | 111319 | 100% | 6  | 6  | 6  | 9.61%  |
| TPC1-p15 | (Q9Y4L1) 150 kDa oxygen-regulated protein precursor (Orp150) (Hypoxia up-regulated 1)                                                                                | OXP_HUMAN   | 111319 | 100% | 4  | 4  | 6  | 5.81%  |
| TPC1-p15 | (Q9Y4L1) 150 kDa oxygen-regulated protein precursor (Orp150) (Hypoxia up-regulated 1)                                                                                | OXP_HUMAN   | 111319 | 100% | 5  | 5  | 7  | 10.10% |

## Protein Identified Sequence Coverage in TPC-1

|          |                                                                                                                                                                                   |             |        |      |   |    |    |        |
|----------|-----------------------------------------------------------------------------------------------------------------------------------------------------------------------------------|-------------|--------|------|---|----|----|--------|
| TPC1-p15 | (Q9Y4L1) 150 kDa oxygen-regulated protein precursor (Orp150) (Hypoxia up-regulated 1)                                                                                             | OXRP_HUMAN  | 111319 | 100% | 4 | 5  | 9  | 4.50%  |
| TPC1-p15 | (Q9Y4L1) 150 kDa oxygen-regulated protein precursor (Orp150) (Hypoxia up-regulated 1)                                                                                             | OXRP_HUMAN  | 111319 | 100% | 4 | 5  | 7  | 4.90%  |
| TPC1-p15 | (Q9Y4L1) 150 kDa oxygen-regulated protein precursor (Orp150) (Hypoxia up-regulated 1)                                                                                             | OXRP_HUMAN  | 111319 | 100% | 5 | 6  | 11 | 6.01%  |
| TPC1-p15 | (Q9Y4L1) 150 kDa oxygen-regulated protein precursor (Orp150) (Hypoxia up-regulated 1)                                                                                             | OXRP_HUMAN  | 111319 | 100% | 8 | 12 | 26 | 15.80% |
| TPC1-p15 | (Q9Y4L1) 150 kDa oxygen-regulated protein precursor (Orp150) (Hypoxia up-regulated 1)                                                                                             | OXRP_HUMAN  | 111319 | 100% | 7 | 11 | 23 | 13.20% |
| TPC1-p15 | (Q9Y4L1) 150 kDa oxygen-regulated protein precursor (Orp150) (Hypoxia up-regulated 1)                                                                                             | OXRP_HUMAN  | 111319 | 100% | 2 | 4  | 10 | 5.31%  |
| TPC1-p15 | (Q9Y4L1) 150 kDa oxygen-regulated protein precursor (Orp150) (Hypoxia up-regulated 1)                                                                                             | OXRP_HUMAN  | 111319 | 100% | 3 | 5  | 8  | 7.21%  |
| TPC1-p15 | (Q9Y624) Junctional adhesion molecule A precursor (JAM-A) (Junctional adhesion molecule 1) (JAM-1) (Platelet adhesion molecule 1) (PAM-1) (Platelet F11 receptor) (CD321 antigen) | JAM1_HUMAN  | 32565  | 100% | 2 | 2  | 4  | 14.00% |
| TPC1-p15 | (Q9Y625) Glypican-6 precursor                                                                                                                                                     | GPC6_HUMAN  | 62718  | 100% | 3 | 3  | 3  | 11.50% |
| TPC1-p15 | (Q9Y680) FK506-binding protein 7 precursor (EC 5.2.1.8) (Peptidyl-prolyl cis-trans isomerase) (PPIase) (Rotamase) (FKBP-23)                                                       | FKBP7_HUMAN | 29992  | 100% | 2 | 2  | 2  | 10.40% |
| TPC1-p15 | (Q9Y680) FK506-binding protein 7 precursor (EC 5.2.1.8) (Peptidyl-prolyl cis-trans isomerase) (PPIase) (Rotamase) (FKBP-23)                                                       | FKBP7_HUMAN | 29992  | 100% | 2 | 2  | 2  | 9.27%  |
| TPC1-p15 | (Q9Y680) FK506-binding protein 7 precursor (EC 5.2.1.8) (Peptidyl-prolyl cis-trans isomerase) (PPIase) (Rotamase) (FKBP-23)                                                       | FKBP7_HUMAN | 29992  | 100% | 2 | 2  | 2  | 8.11%  |
| TPC1-p15 | (Q9Y680) FK506-binding protein 7 precursor (EC 5.2.1.8) (Peptidyl-prolyl cis-trans isomerase) (PPIase) (Rotamase) (FKBP-23)                                                       | FKBP7_HUMAN | 29992  | 100% | 2 | 2  | 3  | 8.11%  |
| TPC1-p15 | (Q9Y680) FK506-binding protein 7 precursor (EC 5.2.1.8) (Peptidyl-prolyl cis-trans isomerase) (PPIase) (Rotamase) (FKBP-23)                                                       | FKBP7_HUMAN | 29992  | 100% | 2 | 2  | 3  | 7.72%  |
| TPC1-p15 | (Q9Y680) FK506-binding protein 7 precursor (EC 5.2.1.8) (Peptidyl-prolyl cis-trans isomerase) (PPIase) (Rotamase) (FKBP-23)                                                       | FKBP7_HUMAN | 29992  | 100% | 3 | 4  | 4  | 10.00% |



**Proteins Identified and Their Sequence Coverage in FTC-133 Cell Line**

Experiment: FTC-133\_p16-p17

Peak List Generator:

Database Name: Sprot\_060206.fasta

Search Engine Set: 2 Search Engines

Scaffold Version: Scaffold\_2\_01\_02

Version: Bioworks 3.3.1

Charge States Calculated: yes

Deisotoped: no

Version:060206

Taxonomy: Homo sa Version: unknown

Number of Proteins: Taxonomy: All Entries

Number of Proteins: 14164

Search Engine: Mascot

Version: 2.1.03

Samples: All Samples

Fragment Tolerance: 0.80 Da (Monoisotopic)

Parent Tolerance: 1.6 Da (Monoisotopic)

Fixed Modifications: +57 on C (Carbamidomethyl)

Variable Modifications: +1 on N (Deamidation) , +16 on M (Oxidation)

Database: Sprot\_060206.fasta (selected for Homo sapiens, unknown version, 14164 entries)

Digestion Enzyme: Trypsin

Max Missed Cleavages: 2

Search Engine: X! Tandem

Version: 2007.01.01.1

Samples: All Samples

Fragment Tolerance: 0.100 Da (Monoisotopic)

Parent Tolerance: 1.6 Da (Monoisotopic)

Fixed Modifications: +57 on C (Carbamidomethyl)

Variable Modifications: +1 on N (Deamidation), +16 on M (Oxidation)

Database: uniprot\_sprot\_060206

Digestion Enzyme: Trypsin

Max Missed Cleavages: 2

Peptide Thresholds: 95.0% minimum

Protein Thresholds: 99.0% minimum and 2 peptides minimum

| Biological sample name | Protein name                                                                                                                                                                 | Protein accession numbers | Protein molecular weight (Da) | Protein identification probability | Number of unique peptides | Number of unique spectra | Number of total spectra | Percentage of total spectra | Percentage sequence coverage |
|------------------------|------------------------------------------------------------------------------------------------------------------------------------------------------------------------------|---------------------------|-------------------------------|------------------------------------|---------------------------|--------------------------|-------------------------|-----------------------------|------------------------------|
| FTC133-p16             | (O00115) Deoxyribonuclease-2-alpha precursor (EC 3.1.22.1) (Deoxyribonuclease II alpha) (DNase II alpha) (Acid DNase) (Lysosomal DNase II) (R31240_2)                        | DNS2A_HUMAN               | 39563                         | 100%                               | 3                         | 3                        | 5                       | 0.05%                       | 10.00%                       |
| FTC133-p16             | (O00115) Deoxyribonuclease-2-alpha precursor (EC 3.1.22.1) (Deoxyribonuclease II alpha) (DNase II alpha) (Acid DNase) (Lysosomal DNase II) (R31240_2)                        | DNS2A_HUMAN               | 39563                         | 100%                               | 2                         | 2                        | 3                       | 0.04%                       | 7.22%                        |
| FTC133-p16             | (O00115) Deoxyribonuclease-2-alpha precursor (EC 3.1.22.1) (Deoxyribonuclease II alpha) (DNase II alpha) (Acid DNase) (Lysosomal DNase II) (R31240_2)                        | DNS2A_HUMAN               | 39563                         | 100%                               | 2                         | 2                        | 2                       | 0.02%                       | 7.22%                        |
| FTC133-p16             | (O00299) Chloride intracellular channel protein 1 (Nuclear chloride ion channel 27) (NCC27) (Chloride channel ABP) (Regulatory nuclear chloride ion channel protein) (hRNCC) | CLIC1_HUMAN               | 26774                         | 100%                               | 3                         | 3                        | 3                       | 0.03%                       | 27.90%                       |

## Protein Identified Sequence Coverage in FTC-133

|            |                                                                                                                                                                                                              |             |        |      |   |   |   |       |        |
|------------|--------------------------------------------------------------------------------------------------------------------------------------------------------------------------------------------------------------|-------------|--------|------|---|---|---|-------|--------|
| FTC133-p16 | (O00299) Chloride intracellular channel protein 1 (Nuclear chloride ion channel 27) (NCC27) (Chloride channel ABP) (Regulatory nuclear chloride ion channel protein) (hRNCC)                                 | CLIC1_HUMAN | 26774  | 100% | 5 | 7 | 7 | 0.06% | 40.00% |
| FTC133-p16 | (O00299) Chloride intracellular channel protein 1 (Nuclear chloride ion channel 27) (NCC27) (Chloride channel ABP) (Regulatory nuclear chloride ion channel protein) (hRNCC)                                 | CLIC1_HUMAN | 26774  | 100% | 2 | 2 | 3 | 0.03% | 12.50% |
| FTC133-p16 | (O00299) Chloride intracellular channel protein 1 (Nuclear chloride ion channel 27) (NCC27) (Chloride channel ABP) (Regulatory nuclear chloride ion channel protein) (hRNCC)                                 | CLIC1_HUMAN | 26774  | 100% | 2 | 2 | 3 | 0.04% | 20.40% |
| FTC133-p16 | (O00468) Agrin precursor                                                                                                                                                                                     | AGRN_HUMAN  | 214863 | 100% | 2 | 2 | 2 | 0.02% | 1.12%  |
| FTC133-p16 | (O00487) 26S proteasome non-ATPase regulatory subunit 14 (26S proteasome regulatory subunit rpn11) (26S proteasome-associated PAD1 homolog 1)                                                                | PSDE_HUMAN  | 34559  | 100% | 2 | 4 | 4 | 0.03% | 18.10% |
| FTC133-p16 | (O00560) Syntenin-1 (Syndecan-binding protein 1) (Melanoma differentiation-associated protein 9) (MDA-9) (Scaffold protein Bbp1) (Pro-TGF-alpha cytoplasmic domain-interacting protein 18) (TACIP18)         | SDCB1_HUMAN | 32427  | 100% | 2 | 4 | 4 | 0.03% | 14.10% |
| FTC133-p16 | (O00764) Pyridoxal kinase (EC 2.7.1.35) (Pyridoxine kinase)                                                                                                                                                  | PDXK_HUMAN  | 35084  | 100% | 2 | 3 | 3 | 0.03% | 12.20% |
| FTC133-p16 | (O14773) Tripeptidyl-peptidase 1 precursor (EC 3.4.14.9) (Tripeptidyl-peptidase I) (TPP-I) (Tripeptidyl aminopeptidase) (Lysosomal pepstatin insensitive protease) (LPIC) (Growth-inhibiting gene 1 protein) | TPP1_HUMAN  | 61230  | 100% | 4 | 4 | 4 | 0.04% | 14.90% |
| FTC133-p16 | (O14773) Tripeptidyl-peptidase 1 precursor (EC 3.4.14.9) (Tripeptidyl-peptidase I) (TPP-I) (Tripeptidyl aminopeptidase) (Lysosomal pepstatin insensitive protease) (LPIC) (Growth-inhibiting gene 1 protein) | TPP1_HUMAN  | 61230  | 100% | 2 | 2 | 2 | 0.02% | 9.95%  |
| FTC133-p16 | (O14818) Proteasome subunit alpha type 7 (EC 3.4.25.1) (Proteasome subunit RC6-1) (Proteasome subunit XAPC7)                                                                                                 | PSA7_HUMAN  | 27869  | 100% | 3 | 3 | 3 | 0.03% | 16.10% |
| FTC133-p16 | (O14818) Proteasome subunit alpha type 7 (EC 3.4.25.1) (Proteasome subunit RC6-1) (Proteasome subunit XAPC7)                                                                                                 | PSA7_HUMAN  | 27869  | 100% | 2 | 2 | 3 | 0.03% | 10.10% |
| FTC133-p16 | (O14818) Proteasome subunit alpha type 7 (EC 3.4.25.1) (Proteasome subunit RC6-1) (Proteasome subunit XAPC7)                                                                                                 | PSA7_HUMAN  | 27869  | 100% | 2 | 2 | 2 | 0.02% | 14.50% |
| FTC133-p16 | (O14818) Proteasome subunit alpha type 7 (EC 3.4.25.1) (Proteasome subunit RC6-1) (Proteasome subunit XAPC7)                                                                                                 | PSA7_HUMAN  | 27869  | 100% | 2 | 2 | 4 | 0.04% | 8.87%  |
| FTC133-p16 | (O15173) Membrane-associated progesterone receptor component 2 (Progesterone membrane-binding protein) (Steroid receptor protein DG6)                                                                        | PGRC2_HUMAN | 23801  | 100% | 2 | 2 | 2 | 0.02% | 16.10% |
| FTC133-p16 | (O15173) Membrane-associated progesterone receptor component 2 (Progesterone membrane-binding protein) (Steroid receptor protein DG6)                                                                        | PGRC2_HUMAN | 23801  | 100% | 4 | 4 | 6 | 0.06% | 18.80% |
| FTC133-p16 | (O15173) Membrane-associated progesterone receptor component 2 (Progesterone membrane-binding protein) (Steroid receptor protein DG6)                                                                        | PGRC2_HUMAN | 23801  | 100% | 2 | 2 | 2 | 0.02% | 14.80% |

## Protein Identified Sequence Coverage in FTC-133

|            |                                                                                                                                                                                                          |             |        |      |    |    |     |       |        |
|------------|----------------------------------------------------------------------------------------------------------------------------------------------------------------------------------------------------------|-------------|--------|------|----|----|-----|-------|--------|
| FTC133-p16 | (O15173) Membrane-associated progesterone receptor component 2 (Progesterone membrane-binding protein) (Steroid receptor protein DG6)                                                                    | PGRC2_HUMAN | 23801  | 100% | 2  | 2  | 2   | 0.02% | 14.80% |
| FTC133-p16 | (O43399) Tumor protein D54 (hD54) (Tumor protein D52-like 2)                                                                                                                                             | TPD54_HUMAN | 22220  | 100% | 5  | 5  | 7   | 0.06% | 30.60% |
| FTC133-p16 | (O43399) Tumor protein D54 (hD54) (Tumor protein D52-like 2)                                                                                                                                             | TPD54_HUMAN | 22220  | 100% | 2  | 2  | 3   | 0.03% | 21.40% |
| FTC133-p16 | (O43399) Tumor protein D54 (hD54) (Tumor protein D52-like 2)                                                                                                                                             | TPD54_HUMAN | 22220  | 100% | 7  | 8  | 14  | 0.13% | 44.20% |
| FTC133-p16 | (O43399) Tumor protein D54 (hD54) (Tumor protein D52-like 2)                                                                                                                                             | TPD54_HUMAN | 22220  | 100% | 6  | 6  | 9   | 0.10% | 28.60% |
| FTC133-p16 | (O43399) Tumor protein D54 (hD54) (Tumor protein D52-like 2)                                                                                                                                             | TPD54_HUMAN | 22220  | 100% | 6  | 7  | 10  | 0.12% | 42.70% |
| FTC133-p16 | (O43399) Tumor protein D54 (hD54) (Tumor protein D52-like 2)                                                                                                                                             | TPD54_HUMAN | 22220  | 100% | 4  | 4  | 6   | 0.07% | 33.50% |
| FTC133-p16 | (O43399) Tumor protein D54 (hD54) (Tumor protein D52-like 2)                                                                                                                                             | TPD54_HUMAN | 22220  | 100% | 3  | 3  | 5   | 0.07% | 26.20% |
| FTC133-p16 | (O43399) Tumor protein D54 (hD54) (Tumor protein D52-like 2)                                                                                                                                             | TPD54_HUMAN | 22220  | 100% | 7  | 8  | 14  | 0.13% | 55.80% |
| FTC133-p16 | (O43707) Alpha-actinin-4 (Non-muscle alpha-actinin 4) (F-actin cross linking protein)                                                                                                                    | ACTN4_HUMAN | 104839 | 100% | 2  | 2  | 4   | 0.03% | 6.04%  |
| FTC133-p16 | (O43852) Calumenin precursor (Crococalbin) (IEF SSP 9302)                                                                                                                                                | CALU_HUMAN  | 37090  | 100% | 5  | 5  | 7   | 0.06% | 27.90% |
| FTC133-p16 | (O43852) Calumenin precursor (Crococalbin) (IEF SSP 9302)                                                                                                                                                | CALU_HUMAN  | 37090  | 100% | 4  | 4  | 13  | 0.11% | 16.50% |
| FTC133-p16 | (O43852) Calumenin precursor (Crococalbin) (IEF SSP 9302)                                                                                                                                                | CALU_HUMAN  | 37090  | 100% | 5  | 6  | 55  | 0.47% | 38.10% |
| FTC133-p16 | (O43852) Calumenin precursor (Crococalbin) (IEF SSP 9302)                                                                                                                                                | CALU_HUMAN  | 37090  | 100% | 4  | 4  | 41  | 0.35% | 17.50% |
| FTC133-p16 | (O43852) Calumenin precursor (Crococalbin) (IEF SSP 9302)                                                                                                                                                | CALU_HUMAN  | 37090  | 100% | 5  | 6  | 116 | 1.01% | 38.10% |
| FTC133-p16 | (O43852) Calumenin precursor (Crococalbin) (IEF SSP 9302)                                                                                                                                                | CALU_HUMAN  | 37090  | 100% | 7  | 10 | 182 | 1.55% | 35.60% |
| FTC133-p16 | (O43852) Calumenin precursor (Crococalbin) (IEF SSP 9302)                                                                                                                                                | CALU_HUMAN  | 37090  | 100% | 6  | 8  | 40  | 0.35% | 33.00% |
| FTC133-p16 | (O43852) Calumenin precursor (Crococalbin) (IEF SSP 9302)                                                                                                                                                | CALU_HUMAN  | 37090  | 100% | 18 | 24 | 56  | 0.51% | 67.00% |
| FTC133-p16 | (O43852) Calumenin precursor (Crococalbin) (IEF SSP 9302)                                                                                                                                                | CALU_HUMAN  | 37090  | 100% | 20 | 29 | 60  | 0.67% | 66.30% |
| FTC133-p16 | (O43852) Calumenin precursor (Crococalbin) (IEF SSP 9302)                                                                                                                                                | CALU_HUMAN  | 37090  | 100% | 15 | 21 | 56  | 0.66% | 58.10% |
| FTC133-p16 | (O43852) Calumenin precursor (Crococalbin) (IEF SSP 9302)                                                                                                                                                | CALU_HUMAN  | 37090  | 100% | 8  | 9  | 18  | 0.21% | 27.90% |
| FTC133-p16 | (O43852) Calumenin precursor (Crococalbin) (IEF SSP 9302)                                                                                                                                                | CALU_HUMAN  | 37090  | 100% | 7  | 7  | 22  | 0.32% | 40.00% |
| FTC133-p16 | (O43852) Calumenin precursor (Crococalbin) (IEF SSP 9302)                                                                                                                                                | CALU_HUMAN  | 37090  | 100% | 20 | 25 | 69  | 0.63% | 68.60% |
| FTC133-p16 | (O60256) Phosphoribosyl pyrophosphate synthetase-associated protein 2 (PRPP synthetase-associated protein 2) (41 kDa phosphoribosypyrophosphate synthetase-associated protein) (PAP41)                   | KPRB_HUMAN  | 40909  | 100% | 2  | 2  | 3   | 0.03% | 8.13%  |
| FTC133-p16 | (O60664) Mannose-6-phosphate receptor-binding protein 1 (Cargo selection protein TIP47) (47 kDa mannose 6-phosphate receptor-binding protein) (47 kDa MPR-binding protein) (Placental protein 17) (PP17) | M6PBP_HUMAN | 47028  | 100% | 7  | 7  | 12  | 0.10% | 28.60% |

## Protein Identified Sequence Coverage in FTC-133

|            |                                                                                                                                                                                                            |             |       |      |    |    |    |       |        |
|------------|------------------------------------------------------------------------------------------------------------------------------------------------------------------------------------------------------------|-------------|-------|------|----|----|----|-------|--------|
| FTC133-p16 | (O60664) Mannose-6-phosphate receptor-binding protein 1 (Cargo selection protein TIP47) (47 kDa mannose 6-phosphate receptor-binding protein) (47 kDa MPR-binding protein) (Placental protein 17) (PP17)   | M6PBP_HUMAN | 47028 | 100% | 2  | 2  | 2  | 0.02% | 13.40% |
| FTC133-p16 | (O60664) Mannose-6-phosphate receptor-binding protein 1 (Cargo selection protein TIP47) (47 kDa mannose 6-phosphate receptor-binding protein) (47 kDa MPR-binding protein) (Placental protein 17) (PP17)   | M6PBP_HUMAN | 47028 | 100% | 5  | 7  | 8  | 0.07% | 23.70% |
| FTC133-p16 | (O60664) Mannose-6-phosphate receptor-binding protein 1 (Cargo selection protein TIP47) (47 kDa mannose 6-phosphate receptor-binding protein) (47 kDa MPR-binding protein) (Placental protein 17) (PP17)   | M6PBP_HUMAN | 47028 | 100% | 11 | 12 | 20 | 0.18% | 44.20% |
| FTC133-p16 | (O60664) Mannose-6-phosphate receptor-binding protein 1 (Cargo selection protein TIP47) (47 kDa mannose 6-phosphate receptor-binding protein) (47 kDa MPR-binding protein) (Placental protein 17) (PP17)   | M6PBP_HUMAN | 47028 | 100% | 7  | 8  | 11 | 0.12% | 29.00% |
| FTC133-p16 | (O60664) Mannose-6-phosphate receptor-binding protein 1 (Cargo selection protein TIP47) (47 kDa mannose 6-phosphate receptor-binding protein) (47 kDa MPR-binding protein) (Placental protein 17) (PP17)   | M6PBP_HUMAN | 47028 | 100% | 8  | 10 | 12 | 0.14% | 32.30% |
| FTC133-p16 | (O60664) Mannose-6-phosphate receptor-binding protein 1 (Cargo selection protein TIP47) (47 kDa mannose 6-phosphate receptor-binding protein) (47 kDa MPR-binding protein) (Placental protein 17) (PP17)   | M6PBP_HUMAN | 47028 | 100% | 8  | 8  | 12 | 0.14% | 34.10% |
| FTC133-p16 | (O60664) Mannose-6-phosphate receptor-binding protein 1 (Cargo selection protein TIP47) (47 kDa mannose 6-phosphate receptor-binding protein) (47 kDa MPR-binding protein) (Placental protein 17) (PP17)   | M6PBP_HUMAN | 47028 | 100% | 4  | 4  | 6  | 0.09% | 21.20% |
| FTC133-p16 | (O60664) Mannose-6-phosphate receptor-binding protein 1 (Cargo selection protein TIP47) (47 kDa mannose 6-phosphate receptor-binding protein) (47 kDa MPR-binding protein) (Placental protein 17) (PP17)   | M6PBP_HUMAN | 47028 | 100% | 7  | 7  | 9  | 0.08% | 31.80% |
| FTC133-p16 | (O60884) DnaJ homolog subfamily A member 2 (HIRA-interacting protein 4) (Cell cycle progression restoration gene 3 protein) (Dnj3) (NY-REN-14 antigen)                                                     | DNJA2_HUMAN | 45728 | 100% | 2  | 2  | 3  | 0.03% | 15.30% |
| FTC133-p16 | (O75381) Peroxisomal membrane protein PEX14 (Peroxin-14) (Peroxisomal membrane anchor protein PEX14) (PTS1 receptor docking protein)                                                                       | PEX14_HUMAN | 41219 | 100% | 2  | 2  | 3  | 0.03% | 12.70% |
| FTC133-p16 | (O95232) Cisplatin resistance-associated overexpressed protein (cAMP regulatory element associated protein 1) (CRE-associated protein 1) (CREAP-1) (Luc7A) (Okadaic acid-inducible phosphoprotein OA48-18) | CROP_HUMAN  | 51449 | 100% | 2  | 2  | 4  | 0.03% | 7.41%  |
| FTC133-p16 | (O95232) Cisplatin resistance-associated overexpressed protein (cAMP regulatory element associated protein 1) (CRE-associated protein 1) (CREAP-1) (Luc7A) (Okadaic acid-inducible phosphoprotein OA48-18) | CROP_HUMAN  | 51449 | 100% | 2  | 2  | 4  | 0.03% | 7.41%  |

## Protein Identified Sequence Coverage in FTC-133

|            |                                                                                                                                                                                                            |             |       |      |   |   |    |       |        |
|------------|------------------------------------------------------------------------------------------------------------------------------------------------------------------------------------------------------------|-------------|-------|------|---|---|----|-------|--------|
| FTC133-p16 | (O95232) Cisplatin resistance-associated overexpressed protein (cAMP regulatory element associated protein 1) (CRE-associated protein 1) (CREAP-1) (Luc7A) (Okadaic acid-inducible phosphoprotein OA48-18) | CROP_HUMAN  | 51449 | 100% | 2 | 2 | 3  | 0.03% | 9.49%  |
| FTC133-p16 | (O95232) Cisplatin resistance-associated overexpressed protein (cAMP regulatory element associated protein 1) (CRE-associated protein 1) (CREAP-1) (Luc7A) (Okadaic acid-inducible phosphoprotein OA48-18) | CROP_HUMAN  | 51449 | 100% | 6 | 6 | 11 | 0.10% | 17.80% |
| FTC133-p16 | (O95232) Cisplatin resistance-associated overexpressed protein (cAMP regulatory element associated protein 1) (CRE-associated protein 1) (CREAP-1) (Luc7A) (Okadaic acid-inducible phosphoprotein OA48-18) | CROP_HUMAN  | 51449 | 100% | 3 | 3 | 3  | 0.03% | 9.03%  |
| FTC133-p16 | (O95232) Cisplatin resistance-associated overexpressed protein (cAMP regulatory element associated protein 1) (CRE-associated protein 1) (CREAP-1) (Luc7A) (Okadaic acid-inducible phosphoprotein OA48-18) | CROP_HUMAN  | 51449 | 100% | 3 | 3 | 3  | 0.04% | 7.87%  |
| FTC133-p16 | (O95232) Cisplatin resistance-associated overexpressed protein (cAMP regulatory element associated protein 1) (CRE-associated protein 1) (CREAP-1) (Luc7A) (Okadaic acid-inducible phosphoprotein OA48-18) | CROP_HUMAN  | 51449 | 100% | 2 | 2 | 3  | 0.04% | 5.79%  |
| FTC133-p16 | (O95232) Cisplatin resistance-associated overexpressed protein (cAMP regulatory element associated protein 1) (CRE-associated protein 1) (CREAP-1) (Luc7A) (Okadaic acid-inducible phosphoprotein OA48-18) | CROP_HUMAN  | 51449 | 100% | 3 | 3 | 3  | 0.03% | 13.20% |
| FTC133-p16 | (O96008) Probable mitochondrial import receptor subunit TOM40 homolog (Translocase of outer membrane 40 kDa subunit homolog) (Haymaker protein) (p38.5)                                                    | TOM40_HUMAN | 37875 | 100% | 3 | 3 | 3  | 0.03% | 11.60% |
| FTC133-p16 | (P00338) L-lactate dehydrogenase A chain (EC 1.1.1.27) (LDH-A) (LDH muscle subunit) (LDH-M) (Proliferation-inducing gene 19 protein) (NY-REN-59 antigen)                                                   | LDHA_HUMAN  | 36540 | 100% | 3 | 3 | 6  | 0.05% | 10.90% |
| FTC133-p16 | (P00338) L-lactate dehydrogenase A chain (EC 1.1.1.27) (LDH-A) (LDH muscle subunit) (LDH-M) (Proliferation-inducing gene 19 protein) (NY-REN-59 antigen)                                                   | LDHA_HUMAN  | 36540 | 100% | 2 | 2 | 6  | 0.05% | 10.60% |
| FTC133-p16 | (P00338) L-lactate dehydrogenase A chain (EC 1.1.1.27) (LDH-A) (LDH muscle subunit) (LDH-M) (Proliferation-inducing gene 19 protein) (NY-REN-59 antigen)                                                   | LDHA_HUMAN  | 36540 | 100% | 6 | 6 | 10 | 0.09% | 24.80% |
| FTC133-p16 | (P00338) L-lactate dehydrogenase A chain (EC 1.1.1.27) (LDH-A) (LDH muscle subunit) (LDH-M) (Proliferation-inducing gene 19 protein) (NY-REN-59 antigen)                                                   | LDHA_HUMAN  | 36540 | 100% | 3 | 3 | 5  | 0.06% | 10.30% |
| FTC133-p16 | (P00338) L-lactate dehydrogenase A chain (EC 1.1.1.27) (LDH-A) (LDH muscle subunit) (LDH-M) (Proliferation-inducing gene 19 protein) (NY-REN-59 antigen)                                                   | LDHA_HUMAN  | 36540 | 100% | 2 | 2 | 4  | 0.05% | 7.25%  |

## Protein Identified Sequence Coverage in FTC-133

|            |                                                                                                                                                                                     |            |       |      |    |    |    |       |        |
|------------|-------------------------------------------------------------------------------------------------------------------------------------------------------------------------------------|------------|-------|------|----|----|----|-------|--------|
| FTC133-p16 | (P00338) L-lactate dehydrogenase A chain (EC 1.1.1.27) (LDH-A) (LDH muscle subunit) (LDH-M) (Proliferation-inducing gene 19 protein) (NY-REN-59 antigen)                            | LDHA_HUMAN | 36540 | 100% | 2  | 2  | 3  | 0.04% | 7.25%  |
| FTC133-p16 | (P00338) L-lactate dehydrogenase A chain (EC 1.1.1.27) (LDH-A) (LDH muscle subunit) (LDH-M) (Proliferation-inducing gene 19 protein) (NY-REN-59 antigen)                            | LDHA_HUMAN | 36540 | 100% | 2  | 2  | 2  | 0.03% | 11.20% |
| FTC133-p16 | (P00338) L-lactate dehydrogenase A chain (EC 1.1.1.27) (LDH-A) (LDH muscle subunit) (LDH-M) (Proliferation-inducing gene 19 protein) (NY-REN-59 antigen)                            | LDHA_HUMAN | 36540 | 100% | 7  | 7  | 11 | 0.10% | 27.50% |
| FTC133-p16 | (P00558) Phosphoglycerate kinase 1 (EC 2.7.2.3) (Primer recognition protein 2) (PRP 2)                                                                                              | PGK1_HUMAN | 44466 | 100% | 4  | 4  | 5  | 0.04% | 10.80% |
| FTC133-p16 | (P00558) Phosphoglycerate kinase 1 (EC 2.7.2.3) (Primer recognition protein 2) (PRP 2)                                                                                              | PGK1_HUMAN | 44466 | 100% | 4  | 6  | 13 | 0.11% | 16.60% |
| FTC133-p16 | (P00558) Phosphoglycerate kinase 1 (EC 2.7.2.3) (Primer recognition protein 2) (PRP 2)                                                                                              | PGK1_HUMAN | 44466 | 100% | 2  | 2  | 4  | 0.03% | 10.30% |
| FTC133-p16 | (P00558) Phosphoglycerate kinase 1 (EC 2.7.2.3) (Primer recognition protein 2) (PRP 2)                                                                                              | PGK1_HUMAN | 44466 | 100% | 12 | 13 | 20 | 0.18% | 43.50% |
| FTC133-p16 | (P00558) Phosphoglycerate kinase 1 (EC 2.7.2.3) (Primer recognition protein 2) (PRP 2)                                                                                              | PGK1_HUMAN | 44466 | 100% | 9  | 10 | 12 | 0.13% | 35.60% |
| FTC133-p16 | (P00558) Phosphoglycerate kinase 1 (EC 2.7.2.3) (Primer recognition protein 2) (PRP 2)                                                                                              | PGK1_HUMAN | 44466 | 100% | 6  | 7  | 10 | 0.12% | 21.90% |
| FTC133-p16 | (P00558) Phosphoglycerate kinase 1 (EC 2.7.2.3) (Primer recognition protein 2) (PRP 2)                                                                                              | PGK1_HUMAN | 44466 | 100% | 5  | 6  | 9  | 0.11% | 19.50% |
| FTC133-p16 | (P00558) Phosphoglycerate kinase 1 (EC 2.7.2.3) (Primer recognition protein 2) (PRP 2)                                                                                              | PGK1_HUMAN | 44466 | 100% | 2  | 2  | 4  | 0.06% | 8.65%  |
| FTC133-p16 | (P00558) Phosphoglycerate kinase 1 (EC 2.7.2.3) (Primer recognition protein 2) (PRP 2)                                                                                              | PGK1_HUMAN | 44466 | 100% | 12 | 13 | 16 | 0.15% | 41.30% |
| FTC133-p16 | (P01011) Alpha-1-antichymotrypsin precursor (ACT) [Contains: Alpha-1-antichymotrypsin His-Pro-less]                                                                                 | AACT_HUMAN | 47635 | 100% | 2  | 3  | 72 | 0.62% | 8.75%  |
| FTC133-p16 | (P02545) Lamin-A/C (70 kDa lamin) (NY-REN-32 antigen)                                                                                                                               | LMNA_HUMAN | 74123 | 100% | 14 | 14 | 16 | 0.14% | 26.80% |
| FTC133-p16 | (P02545) Lamin-A/C (70 kDa lamin) (NY-REN-32 antigen)                                                                                                                               | LMNA_HUMAN | 74123 | 100% | 15 | 16 | 32 | 0.29% | 29.80% |
| FTC133-p16 | (P02545) Lamin-A/C (70 kDa lamin) (NY-REN-32 antigen)                                                                                                                               | LMNA_HUMAN | 74123 | 100% | 5  | 5  | 7  | 0.08% | 12.00% |
| FTC133-p16 | (P02545) Lamin-A/C (70 kDa lamin) (NY-REN-32 antigen)                                                                                                                               | LMNA_HUMAN | 74123 | 100% | 8  | 8  | 9  | 0.11% | 18.40% |
| FTC133-p16 | (P02545) Lamin-A/C (70 kDa lamin) (NY-REN-32 antigen)                                                                                                                               | LMNA_HUMAN | 74123 | 100% | 7  | 7  | 8  | 0.09% | 14.00% |
| FTC133-p16 | (P02545) Lamin-A/C (70 kDa lamin) (NY-REN-32 antigen)                                                                                                                               | LMNA_HUMAN | 74123 | 100% | 11 | 13 | 15 | 0.14% | 20.80% |
| FTC133-p16 | (P02768) Serum albumin precursor                                                                                                                                                    | ALBU_HUMAN | 69349 | 100% | 2  | 2  | 2  | 0.02% | 5.58%  |
| FTC133-p16 | (P02768) Serum albumin precursor                                                                                                                                                    | ALBU_HUMAN | 69349 | 100% | 4  | 4  | 7  | 0.07% | 11.80% |
| FTC133-p16 | (P04004) Vitronectin precursor (Serum spreading factor) (S-protein) (V75) [Contains: Vitronectin V65 subunit; Vitronectin V10 subunit; Somatomedin B]                               | VTNC_HUMAN | 54288 | 100% | 2  | 2  | 3  | 0.03% | 8.79%  |
| FTC133-p16 | (P04062) Glucosylceramidase precursor (EC 3.2.1.45) (Beta-glucocerebrosidase) (Acid beta-glucosidase) (D-glucosyl-N-acylsphingosine glucosylhydrolase) (Alglucerase) (Imiglucerase) | GLCM_HUMAN | 59700 | 100% | 2  | 2  | 3  | 0.03% | 6.72%  |

## Protein Identified Sequence Coverage in FTC-133

|            |                                                                                                                            |             |       |      |   |   |    |       |        |
|------------|----------------------------------------------------------------------------------------------------------------------------|-------------|-------|------|---|---|----|-------|--------|
| FTC133-p16 | (P04075) Fructose-bisphosphate aldolase A (EC 4.1.2.13) (Muscle-type aldolase) (Lung cancer antigen NY-LU-1)               | ALDOA_HUMAN | 39271 | 100% | 2 | 2 | 2  | 0.02% | 6.34%  |
| FTC133-p16 | (P04075) Fructose-bisphosphate aldolase A (EC 4.1.2.13) (Muscle-type aldolase) (Lung cancer antigen NY-LU-1)               | ALDOA_HUMAN | 39271 | 100% | 2 | 3 | 5  | 0.04% | 9.92%  |
| FTC133-p16 | (P04075) Fructose-bisphosphate aldolase A (EC 4.1.2.13) (Muscle-type aldolase) (Lung cancer antigen NY-LU-1)               | ALDOA_HUMAN | 39271 | 100% | 2 | 3 | 4  | 0.03% | 9.64%  |
| FTC133-p16 | (P04075) Fructose-bisphosphate aldolase A (EC 4.1.2.13) (Muscle-type aldolase) (Lung cancer antigen NY-LU-1)               | ALDOA_HUMAN | 39271 | 100% | 5 | 5 | 9  | 0.08% | 20.10% |
| FTC133-p16 | (P04075) Fructose-bisphosphate aldolase A (EC 4.1.2.13) (Muscle-type aldolase) (Lung cancer antigen NY-LU-1)               | ALDOA_HUMAN | 39271 | 100% | 4 | 4 | 12 | 0.13% | 16.80% |
| FTC133-p16 | (P04075) Fructose-bisphosphate aldolase A (EC 4.1.2.13) (Muscle-type aldolase) (Lung cancer antigen NY-LU-1)               | ALDOA_HUMAN | 39271 | 100% | 3 | 3 | 5  | 0.06% | 15.70% |
| FTC133-p16 | (P04075) Fructose-bisphosphate aldolase A (EC 4.1.2.13) (Muscle-type aldolase) (Lung cancer antigen NY-LU-1)               | ALDOA_HUMAN | 39271 | 100% | 2 | 2 | 6  | 0.07% | 7.99%  |
| FTC133-p16 | (P04075) Fructose-bisphosphate aldolase A (EC 4.1.2.13) (Muscle-type aldolase) (Lung cancer antigen NY-LU-1)               | ALDOA_HUMAN | 39271 | 100% | 2 | 2 | 3  | 0.04% | 11.60% |
| FTC133-p16 | (P04075) Fructose-bisphosphate aldolase A (EC 4.1.2.13) (Muscle-type aldolase) (Lung cancer antigen NY-LU-1)               | ALDOA_HUMAN | 39271 | 100% | 6 | 6 | 14 | 0.13% | 25.30% |
| FTC133-p16 | (P04083) Annexin A1 (Annexin I) (Lipocortin I) (Calpactin II) (Chromobindin-9) (p35) (Phospholipase A2 inhibitory protein) | ANXA1_HUMAN | 38567 | 100% | 6 | 6 | 6  | 0.05% | 23.50% |
| FTC133-p16 | (P04083) Annexin A1 (Annexin I) (Lipocortin I) (Calpactin II) (Chromobindin-9) (p35) (Phospholipase A2 inhibitory protein) | ANXA1_HUMAN | 38567 | 100% | 3 | 3 | 11 | 0.09% | 13.00% |
| FTC133-p16 | (P04083) Annexin A1 (Annexin I) (Lipocortin I) (Calpactin II) (Chromobindin-9) (p35) (Phospholipase A2 inhibitory protein) | ANXA1_HUMAN | 38567 | 100% | 6 | 6 | 11 | 0.10% | 26.70% |
| FTC133-p16 | (P04083) Annexin A1 (Annexin I) (Lipocortin I) (Calpactin II) (Chromobindin-9) (p35) (Phospholipase A2 inhibitory protein) | ANXA1_HUMAN | 38567 | 100% | 7 | 8 | 10 | 0.11% | 31.60% |
| FTC133-p16 | (P04083) Annexin A1 (Annexin I) (Lipocortin I) (Calpactin II) (Chromobindin-9) (p35) (Phospholipase A2 inhibitory protein) | ANXA1_HUMAN | 38567 | 100% | 5 | 5 | 8  | 0.09% | 23.80% |
| FTC133-p16 | (P04083) Annexin A1 (Annexin I) (Lipocortin I) (Calpactin II) (Chromobindin-9) (p35) (Phospholipase A2 inhibitory protein) | ANXA1_HUMAN | 38567 | 100% | 4 | 4 | 10 | 0.12% | 19.40% |
| FTC133-p16 | (P04083) Annexin A1 (Annexin I) (Lipocortin I) (Calpactin II) (Chromobindin-9) (p35) (Phospholipase A2 inhibitory protein) | ANXA1_HUMAN | 38567 | 100% | 5 | 5 | 9  | 0.08% | 22.60% |
| FTC133-p16 | (P04216) Thy-1 membrane glycoprotein precursor (Thy-1 antigen) (CD90 antigen) (CDw90 antigen)                              | THY1_HUMAN  | 17917 | 100% | 4 | 5 | 9  | 0.09% | 39.10% |
| FTC133-p16 | (P04216) Thy-1 membrane glycoprotein precursor (Thy-1 antigen) (CD90 antigen) (CDw90 antigen)                              | THY1_HUMAN  | 17917 | 100% | 3 | 4 | 17 | 0.17% | 36.60% |
| FTC133-p16 | (P04216) Thy-1 membrane glycoprotein precursor (Thy-1 antigen) (CD90 antigen) (CDw90 antigen)                              | THY1_HUMAN  | 17917 | 100% | 5 | 6 | 16 | 0.17% | 47.80% |

## Protein Identified Sequence Coverage in FTC-133

|            |                                                                                                      |            |       |      |    |    |    |       |        |
|------------|------------------------------------------------------------------------------------------------------|------------|-------|------|----|----|----|-------|--------|
| FTC133-p16 | (P04216) Thy-1 membrane glycoprotein precursor (Thy-1 antigen) (CD90 antigen) (CDw90 antigen)        | THY1_HUMAN | 17917 | 100% | 2  | 2  | 5  | 0.05% | 27.30% |
| FTC133-p16 | (P04216) Thy-1 membrane glycoprotein precursor (Thy-1 antigen) (CD90 antigen) (CDw90 antigen)        | THY1_HUMAN | 17917 | 100% | 2  | 3  | 4  | 0.03% | 14.90% |
| FTC133-p16 | (P04216) Thy-1 membrane glycoprotein precursor (Thy-1 antigen) (CD90 antigen) (CDw90 antigen)        | THY1_HUMAN | 17917 | 100% | 4  | 7  | 14 | 0.13% | 24.80% |
| FTC133-p16 | (P04216) Thy-1 membrane glycoprotein precursor (Thy-1 antigen) (CD90 antigen) (CDw90 antigen)        | THY1_HUMAN | 17917 | 100% | 4  | 7  | 27 | 0.30% | 24.80% |
| FTC133-p16 | (P04216) Thy-1 membrane glycoprotein precursor (Thy-1 antigen) (CD90 antigen) (CDw90 antigen)        | THY1_HUMAN | 17917 | 100% | 3  | 4  | 14 | 0.17% | 24.20% |
| FTC133-p16 | (P04216) Thy-1 membrane glycoprotein precursor (Thy-1 antigen) (CD90 antigen) (CDw90 antigen)        | THY1_HUMAN | 17917 | 100% | 2  | 3  | 10 | 0.12% | 14.90% |
| FTC133-p16 | (P04216) Thy-1 membrane glycoprotein precursor (Thy-1 antigen) (CD90 antigen) (CDw90 antigen)        | THY1_HUMAN | 17917 | 100% | 4  | 7  | 23 | 0.21% | 24.80% |
| FTC133-p16 | (P04406) Glycerinaldehyde-3-phosphate dehydrogenase (EC 1.2.1.12) (GAPDH)                            | G3P_HUMAN  | 35904 | 100% | 2  | 2  | 2  | 0.02% | 10.50% |
| FTC133-p16 | (P04406) Glycerinaldehyde-3-phosphate dehydrogenase (EC 1.2.1.12) (GAPDH)                            | G3P_HUMAN  | 35904 | 100% | 4  | 5  | 5  | 0.04% | 19.20% |
| FTC133-p16 | (P04406) Glycerinaldehyde-3-phosphate dehydrogenase (EC 1.2.1.12) (GAPDH)                            | G3P_HUMAN  | 35904 | 100% | 3  | 4  | 29 | 0.25% | 26.90% |
| FTC133-p16 | (P04406) Glycerinaldehyde-3-phosphate dehydrogenase (EC 1.2.1.12) (GAPDH)                            | G3P_HUMAN  | 35904 | 100% | 4  | 6  | 32 | 0.27% | 18.90% |
| FTC133-p16 | (P04406) Glycerinaldehyde-3-phosphate dehydrogenase (EC 1.2.1.12) (GAPDH)                            | G3P_HUMAN  | 35904 | 100% | 2  | 2  | 11 | 0.10% | 8.38%  |
| FTC133-p16 | (P04406) Glycerinaldehyde-3-phosphate dehydrogenase (EC 1.2.1.12) (GAPDH)                            | G3P_HUMAN  | 35904 | 100% | 8  | 9  | 19 | 0.17% | 37.10% |
| FTC133-p16 | (P04406) Glycerinaldehyde-3-phosphate dehydrogenase (EC 1.2.1.12) (GAPDH)                            | G3P_HUMAN  | 35904 | 100% | 10 | 13 | 26 | 0.29% | 47.60% |
| FTC133-p16 | (P04406) Glycerinaldehyde-3-phosphate dehydrogenase (EC 1.2.1.12) (GAPDH)                            | G3P_HUMAN  | 35904 | 100% | 8  | 11 | 25 | 0.29% | 37.10% |
| FTC133-p16 | (P04406) Glycerinaldehyde-3-phosphate dehydrogenase (EC 1.2.1.12) (GAPDH)                            | G3P_HUMAN  | 35904 | 100% | 6  | 6  | 16 | 0.19% | 30.80% |
| FTC133-p16 | (P04406) Glycerinaldehyde-3-phosphate dehydrogenase (EC 1.2.1.12) (GAPDH)                            | G3P_HUMAN  | 35904 | 100% | 5  | 5  | 12 | 0.17% | 39.50% |
| FTC133-p16 | (P04406) Glycerinaldehyde-3-phosphate dehydrogenase (EC 1.2.1.12) (GAPDH)                            | G3P_HUMAN  | 35904 | 100% | 8  | 9  | 21 | 0.19% | 40.10% |
| FTC133-p16 | (P04439) HLA class I histocompatibility antigen, A-3 alpha chain precursor (MHC class I antigen A*3) | 1A03_HUMAN | 40823 | 100% | 3  | 3  | 3  | 0.03% | 15.10% |
| FTC133-p16 | (P04439) HLA class I histocompatibility antigen, A-3 alpha chain precursor (MHC class I antigen A*3) | 1A03_HUMAN | 40823 | 100% | 2  | 2  | 3  | 0.03% | 10.40% |
| FTC133-p16 | (P04439) HLA class I histocompatibility antigen, A-3 alpha chain precursor (MHC class I antigen A*3) | 1A03_HUMAN | 40823 | 100% | 2  | 2  | 3  | 0.04% | 7.12%  |
| FTC133-p16 | (P04439) HLA class I histocompatibility antigen, A-3 alpha chain precursor (MHC class I antigen A*3) | 1A03_HUMAN | 40823 | 100% | 2  | 2  | 2  | 0.02% | 10.40% |



Protein Identified Sequence Coverage in FTC-133

|            |                                                                                                                                                                                                                                               |             |       |      |   |   |    |       |        |
|------------|-----------------------------------------------------------------------------------------------------------------------------------------------------------------------------------------------------------------------------------------------|-------------|-------|------|---|---|----|-------|--------|
| FTC133-p16 | (P04632) Calpain small subunit 1 (CSS1) (Calcium-dependent protease small subunit 1) (Calcium-dependent protease small subunit) (CDPS) (Calpain regulatory subunit) (Calcium-activated neutral proteinase small subunit) (CANP small subunit) | CPNS1_HUMAN | 28299 | 100% | 3 | 4 | 6  | 0.05% | 36.60% |
| FTC133-p16 | (P04632) Calpain small subunit 1 (CSS1) (Calcium-dependent protease small subunit 1) (Calcium-dependent protease small subunit) (CDPS) (Calpain regulatory subunit) (Calcium-activated neutral proteinase small subunit) (CANP small subunit) | CPNS1_HUMAN | 28299 | 100% | 2 | 3 | 5  | 0.05% | 14.20% |
| FTC133-p16 | (P04632) Calpain small subunit 1 (CSS1) (Calcium-dependent protease small subunit 1) (Calcium-dependent protease small subunit) (CDPS) (Calpain regulatory subunit) (Calcium-activated neutral proteinase small subunit) (CANP small subunit) | CPNS1_HUMAN | 28299 | 100% | 2 | 3 | 4  | 0.05% | 17.50% |
| FTC133-p16 | (P04632) Calpain small subunit 1 (CSS1) (Calcium-dependent protease small subunit 1) (Calcium-dependent protease small subunit) (CDPS) (Calpain regulatory subunit) (Calcium-activated neutral proteinase small subunit) (CANP small subunit) | CPNS1_HUMAN | 28299 | 100% | 2 | 2 | 2  | 0.03% | 17.50% |
| FTC133-p16 | (P04632) Calpain small subunit 1 (CSS1) (Calcium-dependent protease small subunit 1) (Calcium-dependent protease small subunit) (CDPS) (Calpain regulatory subunit) (Calcium-activated neutral proteinase small subunit) (CANP small subunit) | CPNS1_HUMAN | 28299 | 100% | 2 | 3 | 3  | 0.03% | 11.20% |
| FTC133-p16 | (P04792) Heat-shock protein beta-1 (HspB1) (Heat shock 27 kDa protein) (HSP 27) (Stress-responsive protein 27) (SRP27) (Estrogen-regulated 24 kDa protein) (28 kDa heat shock protein)                                                        | HSPB1_HUMAN | 22765 | 100% | 2 | 2 | 5  | 0.05% | 13.20% |
| FTC133-p16 | (P04792) Heat-shock protein beta-1 (HspB1) (Heat shock 27 kDa protein) (HSP 27) (Stress-responsive protein 27) (SRP27) (Estrogen-regulated 24 kDa protein) (28 kDa heat shock protein)                                                        | HSPB1_HUMAN | 22765 | 100% | 3 | 3 | 7  | 0.06% | 32.20% |
| FTC133-p16 | (P04792) Heat-shock protein beta-1 (HspB1) (Heat shock 27 kDa protein) (HSP 27) (Stress-responsive protein 27) (SRP27) (Estrogen-regulated 24 kDa protein) (28 kDa heat shock protein)                                                        | HSPB1_HUMAN | 22765 | 100% | 3 | 4 | 10 | 0.08% | 27.80% |
| FTC133-p16 | (P04792) Heat-shock protein beta-1 (HspB1) (Heat shock 27 kDa protein) (HSP 27) (Stress-responsive protein 27) (SRP27) (Estrogen-regulated 24 kDa protein) (28 kDa heat shock protein)                                                        | HSPB1_HUMAN | 22765 | 100% | 2 | 2 | 4  | 0.03% | 12.70% |
| FTC133-p16 | (P04792) Heat-shock protein beta-1 (HspB1) (Heat shock 27 kDa protein) (HSP 27) (Stress-responsive protein 27) (SRP27) (Estrogen-regulated 24 kDa protein) (28 kDa heat shock protein)                                                        | HSPB1_HUMAN | 22765 | 100% | 2 | 4 | 70 | 0.60% | 22.90% |

## Protein Identified Sequence Coverage in FTC-133

|            |                                                                                                                                                                                        |             |       |      |   |    |    |       |        |
|------------|----------------------------------------------------------------------------------------------------------------------------------------------------------------------------------------|-------------|-------|------|---|----|----|-------|--------|
| FTC133-p16 | (P04792) Heat-shock protein beta-1 (HspB1) (Heat shock 27 kDa protein) (HSP 27) (Stress-responsive protein 27) (SRP27) (Estrogen-regulated 24 kDa protein) (28 kDa heat shock protein) | HSPB1_HUMAN | 22765 | 100% | 6 | 8  | 17 | 0.16% | 54.60% |
| FTC133-p16 | (P04792) Heat-shock protein beta-1 (HspB1) (Heat shock 27 kDa protein) (HSP 27) (Stress-responsive protein 27) (SRP27) (Estrogen-regulated 24 kDa protein) (28 kDa heat shock protein) | HSPB1_HUMAN | 22765 | 100% | 7 | 10 | 22 | 0.25% | 58.50% |
| FTC133-p16 | (P04792) Heat-shock protein beta-1 (HspB1) (Heat shock 27 kDa protein) (HSP 27) (Stress-responsive protein 27) (SRP27) (Estrogen-regulated 24 kDa protein) (28 kDa heat shock protein) | HSPB1_HUMAN | 22765 | 100% | 8 | 11 | 25 | 0.29% | 63.90% |
| FTC133-p16 | (P04792) Heat-shock protein beta-1 (HspB1) (Heat shock 27 kDa protein) (HSP 27) (Stress-responsive protein 27) (SRP27) (Estrogen-regulated 24 kDa protein) (28 kDa heat shock protein) | HSPB1_HUMAN | 22765 | 100% | 2 | 4  | 9  | 0.11% | 16.10% |
| FTC133-p16 | (P04792) Heat-shock protein beta-1 (HspB1) (Heat shock 27 kDa protein) (HSP 27) (Stress-responsive protein 27) (SRP27) (Estrogen-regulated 24 kDa protein) (28 kDa heat shock protein) | HSPB1_HUMAN | 22765 | 100% | 2 | 2  | 6  | 0.09% | 33.70% |
| FTC133-p16 | (P04792) Heat-shock protein beta-1 (HspB1) (Heat shock 27 kDa protein) (HSP 27) (Stress-responsive protein 27) (SRP27) (Estrogen-regulated 24 kDa protein) (28 kDa heat shock protein) | HSPB1_HUMAN | 22765 | 100% | 7 | 9  | 18 | 0.17% | 64.90% |
| FTC133-p16 | (P04844) Dolichyl-diphosphooligosaccharide--protein glycosyltransferase 63 kDa subunit precursor (EC 2.4.1.119) (Ribophorin II) (RPN-II) (RIBIIR)                                      | RIB2_HUMAN  | 69267 | 100% | 2 | 2  | 2  | 0.02% | 8.56%  |
| FTC133-p16 | (P04844) Dolichyl-diphosphooligosaccharide--protein glycosyltransferase 63 kDa subunit precursor (EC 2.4.1.119) (Ribophorin II) (RPN-II) (RIBIIR)                                      | RIB2_HUMAN  | 69267 | 100% | 2 | 2  | 2  | 0.02% | 4.75%  |
| FTC133-p16 | (P05387) 60S acidic ribosomal protein P2 (NY-REN-44 antigen)                                                                                                                           | RLA2_HUMAN  | 11647 | 100% | 2 | 2  | 3  | 0.03% | 45.20% |
| FTC133-p16 | (P05388) 60S acidic ribosomal protein P0 (L10E)                                                                                                                                        | RLA0_HUMAN  | 34256 | 100% | 2 | 2  | 2  | 0.02% | 9.46%  |
| FTC133-p16 | (P05388) 60S acidic ribosomal protein P0 (L10E)                                                                                                                                        | RLA0_HUMAN  | 34256 | 100% | 3 | 4  | 8  | 0.07% | 19.20% |
| FTC133-p16 | (P05388) 60S acidic ribosomal protein P0 (L10E)                                                                                                                                        | RLA0_HUMAN  | 34256 | 100% | 5 | 5  | 8  | 0.07% | 24.30% |
| FTC133-p16 | (P05388) 60S acidic ribosomal protein P0 (L10E)                                                                                                                                        | RLA0_HUMAN  | 34256 | 100% | 4 | 4  | 5  | 0.06% | 20.80% |
| FTC133-p16 | (P05388) 60S acidic ribosomal protein P0 (L10E)                                                                                                                                        | RLA0_HUMAN  | 34256 | 100% | 5 | 5  | 5  | 0.06% | 26.20% |
| FTC133-p16 | (P05388) 60S acidic ribosomal protein P0 (L10E)                                                                                                                                        | RLA0_HUMAN  | 34256 | 100% | 4 | 4  | 6  | 0.07% | 16.40% |
| FTC133-p16 | (P05388) 60S acidic ribosomal protein P0 (L10E)                                                                                                                                        | RLA0_HUMAN  | 34256 | 100% | 2 | 2  | 2  | 0.03% | 16.70% |
| FTC133-p16 | (P05388) 60S acidic ribosomal protein P0 (L10E)                                                                                                                                        | RLA0_HUMAN  | 34256 | 100% | 7 | 7  | 8  | 0.07% | 32.50% |
| FTC133-p16 | (P05455) Lupus La protein (Sjogren syndrome type B antigen) (SS-B) (La ribonucleoprotein) (La autoantigen)                                                                             | LA_HUMAN    | 46821 | 100% | 2 | 2  | 5  | 0.04% | 6.86%  |
| FTC133-p16 | (P05455) Lupus La protein (Sjogren syndrome type B antigen) (SS-B) (La ribonucleoprotein) (La autoantigen)                                                                             | LA_HUMAN    | 46821 | 100% | 2 | 2  | 3  | 0.03% | 7.84%  |
| FTC133-p16 | (P05455) Lupus La protein (Sjogren syndrome type B antigen) (SS-B) (La ribonucleoprotein) (La autoantigen)                                                                             | LA_HUMAN    | 46821 | 100% | 2 | 2  | 3  | 0.03% | 7.84%  |

## Protein Identified Sequence Coverage in FTC-133

|            |                                                                                                                     |            |       |      |    |    |    |       |        |
|------------|---------------------------------------------------------------------------------------------------------------------|------------|-------|------|----|----|----|-------|--------|
| FTC133-p16 | (P05455) Lupus La protein (Sjogren syndrome type B antigen) (SS-B) (La ribonucleoprotein) (La autoantigen)          | LA_HUMAN   | 46821 | 100% | 2  | 2  | 3  | 0.04% | 6.86%  |
| FTC133-p16 | (P05455) Lupus La protein (Sjogren syndrome type B antigen) (SS-B) (La ribonucleoprotein) (La autoantigen)          | LA_HUMAN   | 46821 | 100% | 2  | 2  | 3  | 0.04% | 6.86%  |
| FTC133-p16 | (P05455) Lupus La protein (Sjogren syndrome type B antigen) (SS-B) (La ribonucleoprotein) (La autoantigen)          | LA_HUMAN   | 46821 | 100% | 2  | 2  | 3  | 0.03% | 7.84%  |
| FTC133-p16 | (P05556) Integrin beta-1 precursor (Fibronectin receptor beta subunit) (Integrin VLA-4 beta subunit) (CD29 antigen) | ITB1_HUMAN | 88447 | 100% | 7  | 7  | 10 | 0.09% | 10.50% |
| FTC133-p16 | (P05556) Integrin beta-1 precursor (Fibronectin receptor beta subunit) (Integrin VLA-4 beta subunit) (CD29 antigen) | ITB1_HUMAN | 88447 | 100% | 4  | 6  | 25 | 0.21% | 8.52%  |
| FTC133-p16 | (P05556) Integrin beta-1 precursor (Fibronectin receptor beta subunit) (Integrin VLA-4 beta subunit) (CD29 antigen) | ITB1_HUMAN | 88447 | 100% | 2  | 2  | 4  | 0.03% | 5.39%  |
| FTC133-p16 | (P05556) Integrin beta-1 precursor (Fibronectin receptor beta subunit) (Integrin VLA-4 beta subunit) (CD29 antigen) | ITB1_HUMAN | 88447 | 100% | 2  | 3  | 10 | 0.09% | 5.39%  |
| FTC133-p16 | (P05556) Integrin beta-1 precursor (Fibronectin receptor beta subunit) (Integrin VLA-4 beta subunit) (CD29 antigen) | ITB1_HUMAN | 88447 | 100% | 10 | 12 | 23 | 0.21% | 15.00% |
| FTC133-p16 | (P05556) Integrin beta-1 precursor (Fibronectin receptor beta subunit) (Integrin VLA-4 beta subunit) (CD29 antigen) | ITB1_HUMAN | 88447 | 100% | 3  | 4  | 7  | 0.08% | 5.01%  |
| FTC133-p16 | (P05556) Integrin beta-1 precursor (Fibronectin receptor beta subunit) (Integrin VLA-4 beta subunit) (CD29 antigen) | ITB1_HUMAN | 88447 | 100% | 5  | 6  | 9  | 0.11% | 9.52%  |
| FTC133-p16 | (P05556) Integrin beta-1 precursor (Fibronectin receptor beta subunit) (Integrin VLA-4 beta subunit) (CD29 antigen) | ITB1_HUMAN | 88447 | 100% | 5  | 5  | 6  | 0.07% | 8.65%  |
| FTC133-p16 | (P05556) Integrin beta-1 precursor (Fibronectin receptor beta subunit) (Integrin VLA-4 beta subunit) (CD29 antigen) | ITB1_HUMAN | 88447 | 100% | 5  | 5  | 9  | 0.13% | 11.90% |
| FTC133-p16 | (P05556) Integrin beta-1 precursor (Fibronectin receptor beta subunit) (Integrin VLA-4 beta subunit) (CD29 antigen) | ITB1_HUMAN | 88447 | 100% | 7  | 8  | 8  | 0.07% | 10.20% |
| FTC133-p16 | (P06576) ATP synthase beta chain, mitochondrial precursor (EC 3.6.3.14)                                             | ATPB_HUMAN | 56543 | 100% | 7  | 7  | 9  | 0.08% | 23.80% |
| FTC133-p16 | (P06576) ATP synthase beta chain, mitochondrial precursor (EC 3.6.3.14)                                             | ATPB_HUMAN | 56543 | 100% | 3  | 3  | 9  | 0.08% | 17.20% |
| FTC133-p16 | (P06576) ATP synthase beta chain, mitochondrial precursor (EC 3.6.3.14)                                             | ATPB_HUMAN | 56543 | 100% | 6  | 9  | 23 | 0.19% | 18.70% |
| FTC133-p16 | (P06576) ATP synthase beta chain, mitochondrial precursor (EC 3.6.3.14)                                             | ATPB_HUMAN | 56543 | 100% | 3  | 3  | 3  | 0.03% | 14.90% |
| FTC133-p16 | (P06576) ATP synthase beta chain, mitochondrial precursor (EC 3.6.3.14)                                             | ATPB_HUMAN | 56543 | 100% | 7  | 9  | 48 | 0.41% | 31.00% |
| FTC133-p16 | (P06576) ATP synthase beta chain, mitochondrial precursor (EC 3.6.3.14)                                             | ATPB_HUMAN | 56543 | 100% | 7  | 7  | 28 | 0.24% | 31.90% |
| FTC133-p16 | (P06576) ATP synthase beta chain, mitochondrial precursor (EC 3.6.3.14)                                             | ATPB_HUMAN | 56543 | 100% | 18 | 22 | 43 | 0.39% | 57.50% |
| FTC133-p16 | (P06576) ATP synthase beta chain, mitochondrial precursor (EC 3.6.3.14)                                             | ATPB_HUMAN | 56543 | 100% | 17 | 20 | 30 | 0.33% | 58.80% |
| FTC133-p16 | (P06576) ATP synthase beta chain, mitochondrial precursor (EC 3.6.3.14)                                             | ATPB_HUMAN | 56543 | 100% | 11 | 11 | 18 | 0.21% | 38.90% |

## Protein Identified Sequence Coverage in FTC-133

|            |                                                                                                                                                                                                                            |             |       |      |    |    |     |       |        |
|------------|----------------------------------------------------------------------------------------------------------------------------------------------------------------------------------------------------------------------------|-------------|-------|------|----|----|-----|-------|--------|
| FTC133-p16 | (P06576) ATP synthase beta chain, mitochondrial precursor (EC 3.6.3.14)                                                                                                                                                    | ATPB_HUMAN  | 56543 | 100% | 10 | 12 | 19  | 0.22% | 30.20% |
| FTC133-p16 | (P06576) ATP synthase beta chain, mitochondrial precursor (EC 3.6.3.14)                                                                                                                                                    | ATPB_HUMAN  | 56543 | 100% | 6  | 6  | 9   | 0.13% | 29.10% |
| FTC133-p16 | (P06576) ATP synthase beta chain, mitochondrial precursor (EC 3.6.3.14)                                                                                                                                                    | ATPB_HUMAN  | 56543 | 100% | 21 | 22 | 39  | 0.36% | 64.70% |
| FTC133-p16 | (P06703) Protein S100-A6 (S100 calcium-binding protein A6) (Calcyclin) (Prolactin receptor-associated protein) (PRA) (Growth factor-inducible protein 2A9) (MLN 4)                                                         | S10A6_HUMAN | 10162 | 100% | 3  | 3  | 5   | 0.05% | 45.60% |
| FTC133-p16 | (P06733) Alpha-enolase (EC 4.2.1.11) (2-phospho-D-glycerate hydro-lyase) (Non-neural enolase) (NNE) (Enolase 1) (Phosphopyruvate hydratase) (C-myc promoter-binding protein) (MBP-1) (MPB-1) (Plasminogen-binding protein) | ENOA_HUMAN  | 47021 | 100% | 9  | 14 | 41  | 0.35% | 34.90% |
| FTC133-p16 | (P06733) Alpha-enolase (EC 4.2.1.11) (2-phospho-D-glycerate hydro-lyase) (Non-neural enolase) (NNE) (Enolase 1) (Phosphopyruvate hydratase) (C-myc promoter-binding protein) (MBP-1) (MPB-1) (Plasminogen-binding protein) | ENOA_HUMAN  | 47021 | 100% | 8  | 14 | 253 | 2.14% | 32.30% |
| FTC133-p16 | (P06733) Alpha-enolase (EC 4.2.1.11) (2-phospho-D-glycerate hydro-lyase) (Non-neural enolase) (NNE) (Enolase 1) (Phosphopyruvate hydratase) (C-myc promoter-binding protein) (MBP-1) (MPB-1) (Plasminogen-binding protein) | ENOA_HUMAN  | 47021 | 100% | 6  | 9  | 20  | 0.17% | 25.90% |
| FTC133-p16 | (P06733) Alpha-enolase (EC 4.2.1.11) (2-phospho-D-glycerate hydro-lyase) (Non-neural enolase) (NNE) (Enolase 1) (Phosphopyruvate hydratase) (C-myc promoter-binding protein) (MBP-1) (MPB-1) (Plasminogen-binding protein) | ENOA_HUMAN  | 47021 | 100% | 16 | 19 | 54  | 0.50% | 57.00% |
| FTC133-p16 | (P06733) Alpha-enolase (EC 4.2.1.11) (2-phospho-D-glycerate hydro-lyase) (Non-neural enolase) (NNE) (Enolase 1) (Phosphopyruvate hydratase) (C-myc promoter-binding protein) (MBP-1) (MPB-1) (Plasminogen-binding protein) | ENOA_HUMAN  | 47021 | 100% | 14 | 18 | 55  | 0.61% | 50.60% |
| FTC133-p16 | (P06733) Alpha-enolase (EC 4.2.1.11) (2-phospho-D-glycerate hydro-lyase) (Non-neural enolase) (NNE) (Enolase 1) (Phosphopyruvate hydratase) (C-myc promoter-binding protein) (MBP-1) (MPB-1) (Plasminogen-binding protein) | ENOA_HUMAN  | 47021 | 100% | 15 | 18 | 55  | 0.65% | 53.60% |
| FTC133-p16 | (P06733) Alpha-enolase (EC 4.2.1.11) (2-phospho-D-glycerate hydro-lyase) (Non-neural enolase) (NNE) (Enolase 1) (Phosphopyruvate hydratase) (C-myc promoter-binding protein) (MBP-1) (MPB-1) (Plasminogen-binding protein) | ENOA_HUMAN  | 47021 | 100% | 12 | 15 | 43  | 0.50% | 40.60% |
| FTC133-p16 | (P06733) Alpha-enolase (EC 4.2.1.11) (2-phospho-D-glycerate hydro-lyase) (Non-neural enolase) (NNE) (Enolase 1) (Phosphopyruvate hydratase) (C-myc promoter-binding protein) (MBP-1) (MPB-1) (Plasminogen-binding protein) | ENOA_HUMAN  | 47021 | 100% | 4  | 4  | 20  | 0.29% | 21.50% |
| FTC133-p16 | (P06733) Alpha-enolase (EC 4.2.1.11) (2-phospho-D-glycerate hydro-lyase) (Non-neural enolase) (NNE) (Enolase 1) (Phosphopyruvate hydratase) (C-myc promoter-binding protein) (MBP-1) (MPB-1) (Plasminogen-binding protein) | ENOA_HUMAN  | 47021 | 100% | 17 | 22 | 58  | 0.53% | 60.00% |

Protein Identified Sequence Coverage in FTC-133

|            |                                                                                                                                                                           |            |       |      |   |   |    |       |        |
|------------|---------------------------------------------------------------------------------------------------------------------------------------------------------------------------|------------|-------|------|---|---|----|-------|--------|
| FTC133-p16 | (P06744) Glucose-6-phosphate isomerase (EC 5.3.1.9) (GPI) (Phosphoglucose isomerase) (PGI) (Phosphohexose isomerase) (PHI) (Neuroleukin) (NLK) (Sperm antigen 36) (SA-36) | G6PI_HUMAN | 62999 | 100% | 2 | 2 | 3  | 0.03% | 5.75%  |
| FTC133-p16 | (P06748) Nucleophosmin (NPM) (Nucleolar phosphoprotein B23) (Numatrin) (Nucleolar protein NO38)                                                                           | NPM_HUMAN  | 32557 | 100% | 2 | 3 | 9  | 0.08% | 11.90% |
| FTC133-p16 | (P06748) Nucleophosmin (NPM) (Nucleolar phosphoprotein B23) (Numatrin) (Nucleolar protein NO38)                                                                           | NPM_HUMAN  | 32557 | 100% | 3 | 4 | 6  | 0.05% | 18.40% |
| FTC133-p16 | (P06748) Nucleophosmin (NPM) (Nucleolar phosphoprotein B23) (Numatrin) (Nucleolar protein NO38)                                                                           | NPM_HUMAN  | 32557 | 100% | 5 | 7 | 12 | 0.11% | 25.90% |
| FTC133-p16 | (P06748) Nucleophosmin (NPM) (Nucleolar phosphoprotein B23) (Numatrin) (Nucleolar protein NO38)                                                                           | NPM_HUMAN  | 32557 | 100% | 4 | 6 | 8  | 0.09% | 21.40% |
| FTC133-p16 | (P06748) Nucleophosmin (NPM) (Nucleolar phosphoprotein B23) (Numatrin) (Nucleolar protein NO38)                                                                           | NPM_HUMAN  | 32557 | 100% | 4 | 6 | 10 | 0.12% | 21.40% |
| FTC133-p16 | (P06748) Nucleophosmin (NPM) (Nucleolar phosphoprotein B23) (Numatrin) (Nucleolar protein NO38)                                                                           | NPM_HUMAN  | 32557 | 100% | 3 | 3 | 3  | 0.04% | 14.30% |
| FTC133-p16 | (P06748) Nucleophosmin (NPM) (Nucleolar phosphoprotein B23) (Numatrin) (Nucleolar protein NO38)                                                                           | NPM_HUMAN  | 32557 | 100% | 2 | 2 | 5  | 0.07% | 13.60% |
| FTC133-p16 | (P06748) Nucleophosmin (NPM) (Nucleolar phosphoprotein B23) (Numatrin) (Nucleolar protein NO38)                                                                           | NPM_HUMAN  | 32557 | 100% | 3 | 4 | 6  | 0.06% | 16.70% |
| FTC133-p16 | (P06865) Beta-hexosaminidase alpha chain precursor (EC 3.2.1.52) (N-acetyl-beta-glucosaminidase) (Beta-N-acetylhexosaminidase) (Hexosaminidase A)                         | HEXA_HUMAN | 60672 | 100% | 2 | 2 | 3  | 0.03% | 5.10%  |
| FTC133-p16 | (P06865) Beta-hexosaminidase alpha chain precursor (EC 3.2.1.52) (N-acetyl-beta-glucosaminidase) (Beta-N-acetylhexosaminidase) (Hexosaminidase A)                         | HEXA_HUMAN | 60672 | 100% | 4 | 4 | 7  | 0.06% | 9.64%  |
| FTC133-p16 | (P06865) Beta-hexosaminidase alpha chain precursor (EC 3.2.1.52) (N-acetyl-beta-glucosaminidase) (Beta-N-acetylhexosaminidase) (Hexosaminidase A)                         | HEXA_HUMAN | 60672 | 100% | 3 | 3 | 4  | 0.03% | 13.20% |
| FTC133-p16 | (P06865) Beta-hexosaminidase alpha chain precursor (EC 3.2.1.52) (N-acetyl-beta-glucosaminidase) (Beta-N-acetylhexosaminidase) (Hexosaminidase A)                         | HEXA_HUMAN | 60672 | 100% | 9 | 9 | 16 | 0.15% | 20.00% |
| FTC133-p16 | (P06865) Beta-hexosaminidase alpha chain precursor (EC 3.2.1.52) (N-acetyl-beta-glucosaminidase) (Beta-N-acetylhexosaminidase) (Hexosaminidase A)                         | HEXA_HUMAN | 60672 | 100% | 7 | 8 | 9  | 0.10% | 18.30% |
| FTC133-p16 | (P06865) Beta-hexosaminidase alpha chain precursor (EC 3.2.1.52) (N-acetyl-beta-glucosaminidase) (Beta-N-acetylhexosaminidase) (Hexosaminidase A)                         | HEXA_HUMAN | 60672 | 100% | 6 | 6 | 9  | 0.11% | 15.30% |
| FTC133-p16 | (P06865) Beta-hexosaminidase alpha chain precursor (EC 3.2.1.52) (N-acetyl-beta-glucosaminidase) (Beta-N-acetylhexosaminidase) (Hexosaminidase A)                         | HEXA_HUMAN | 60672 | 100% | 6 | 6 | 8  | 0.09% | 15.30% |

## Protein Identified Sequence Coverage in FTC-133

|            |                                                                                                                                                        |             |       |      |    |    |    |       |        |
|------------|--------------------------------------------------------------------------------------------------------------------------------------------------------|-------------|-------|------|----|----|----|-------|--------|
| FTC133-p16 | (P06865) Beta-hexosaminidase alpha chain precursor (EC 3.2.1.52) (N-acetyl-beta-glucosaminidase) (Beta-N-acetylhexosaminidase) (Hexosaminidase A)      | HEXA_HUMAN  | 60672 | 100% | 6  | 7  | 12 | 0.11% | 14.20% |
| FTC133-p16 | (P07195) L-lactate dehydrogenase B chain (EC 1.1.1.27) (LDH-B) (LDH heart subunit) (LDH-H) (NY-REN-46 antigen)                                         | LDHB_HUMAN  | 36489 | 100% | 2  | 2  | 3  | 0.03% | 7.81%  |
| FTC133-p16 | (P07195) L-lactate dehydrogenase B chain (EC 1.1.1.27) (LDH-B) (LDH heart subunit) (LDH-H) (NY-REN-46 antigen)                                         | LDHB_HUMAN  | 36489 | 100% | 2  | 2  | 4  | 0.03% | 7.81%  |
| FTC133-p16 | (P07195) L-lactate dehydrogenase B chain (EC 1.1.1.27) (LDH-B) (LDH heart subunit) (LDH-H) (NY-REN-46 antigen)                                         | LDHB_HUMAN  | 36489 | 100% | 2  | 2  | 2  | 0.02% | 11.10% |
| FTC133-p16 | (P07195) L-lactate dehydrogenase B chain (EC 1.1.1.27) (LDH-B) (LDH heart subunit) (LDH-H) (NY-REN-46 antigen)                                         | LDHB_HUMAN  | 36489 | 100% | 4  | 4  | 5  | 0.05% | 18.60% |
| FTC133-p16 | (P07195) L-lactate dehydrogenase B chain (EC 1.1.1.27) (LDH-B) (LDH heart subunit) (LDH-H) (NY-REN-46 antigen)                                         | LDHB_HUMAN  | 36489 | 100% | 4  | 4  | 6  | 0.07% | 16.80% |
| FTC133-p16 | (P07195) L-lactate dehydrogenase B chain (EC 1.1.1.27) (LDH-B) (LDH heart subunit) (LDH-H) (NY-REN-46 antigen)                                         | LDHB_HUMAN  | 36489 | 100% | 2  | 2  | 2  | 0.02% | 10.50% |
| FTC133-p16 | (P07195) L-lactate dehydrogenase B chain (EC 1.1.1.27) (LDH-B) (LDH heart subunit) (LDH-H) (NY-REN-46 antigen)                                         | LDHB_HUMAN  | 36489 | 100% | 4  | 4  | 8  | 0.07% | 18.30% |
| FTC133-p16 | (P07237) Protein disulfide-isomerase precursor (EC 5.3.4.1) (PDI) (Prolyl 4-hydroxylase beta subunit) (Cellular thyroid hormone-binding protein) (p55) | PDIA1_HUMAN | 57100 | 100% | 6  | 9  | 17 | 0.15% | 19.90% |
| FTC133-p16 | (P07237) Protein disulfide-isomerase precursor (EC 5.3.4.1) (PDI) (Prolyl 4-hydroxylase beta subunit) (Cellular thyroid hormone-binding protein) (p55) | PDIA1_HUMAN | 57100 | 100% | 4  | 7  | 53 | 0.45% | 16.30% |
| FTC133-p16 | (P07237) Protein disulfide-isomerase precursor (EC 5.3.4.1) (PDI) (Prolyl 4-hydroxylase beta subunit) (Cellular thyroid hormone-binding protein) (p55) | PDIA1_HUMAN | 57100 | 100% | 2  | 3  | 3  | 0.03% | 10.80% |
| FTC133-p16 | (P07237) Protein disulfide-isomerase precursor (EC 5.3.4.1) (PDI) (Prolyl 4-hydroxylase beta subunit) (Cellular thyroid hormone-binding protein) (p55) | PDIA1_HUMAN | 57100 | 100% | 5  | 6  | 9  | 0.08% | 16.50% |
| FTC133-p16 | (P07237) Protein disulfide-isomerase precursor (EC 5.3.4.1) (PDI) (Prolyl 4-hydroxylase beta subunit) (Cellular thyroid hormone-binding protein) (p55) | PDIA1_HUMAN | 57100 | 100% | 3  | 3  | 5  | 0.04% | 9.45%  |
| FTC133-p16 | (P07237) Protein disulfide-isomerase precursor (EC 5.3.4.1) (PDI) (Prolyl 4-hydroxylase beta subunit) (Cellular thyroid hormone-binding protein) (p55) | PDIA1_HUMAN | 57100 | 100% | 17 | 20 | 34 | 0.31% | 42.50% |
| FTC133-p16 | (P07237) Protein disulfide-isomerase precursor (EC 5.3.4.1) (PDI) (Prolyl 4-hydroxylase beta subunit) (Cellular thyroid hormone-binding protein) (p55) | PDIA1_HUMAN | 57100 | 100% | 11 | 15 | 23 | 0.26% | 33.50% |
| FTC133-p16 | (P07237) Protein disulfide-isomerase precursor (EC 5.3.4.1) (PDI) (Prolyl 4-hydroxylase beta subunit) (Cellular thyroid hormone-binding protein) (p55) | PDIA1_HUMAN | 57100 | 100% | 12 | 16 | 26 | 0.31% | 30.70% |

Protein Identified Sequence Coverage in FTC-133

|            |                                                                                                                                                        |             |       |      |    |    |    |       |        |
|------------|--------------------------------------------------------------------------------------------------------------------------------------------------------|-------------|-------|------|----|----|----|-------|--------|
| FTC133-p16 | (P07237) Protein disulfide-isomerase precursor (EC 5.3.4.1) (PDI) (Prolyl 4-hydroxylase beta subunit) (Cellular thyroid hormone-binding protein) (p55) | PDIA1_HUMAN | 57100 | 100% | 9  | 9  | 20 | 0.23% | 22.60% |
| FTC133-p16 | (P07237) Protein disulfide-isomerase precursor (EC 5.3.4.1) (PDI) (Prolyl 4-hydroxylase beta subunit) (Cellular thyroid hormone-binding protein) (p55) | PDIA1_HUMAN | 57100 | 100% | 14 | 17 | 29 | 0.27% | 39.00% |
| FTC133-p16 | (P07339) Cathepsin D precursor (EC 3.4.23.5) [Contains: Cathepsin D light chain; Cathepsin D heavy chain]                                              | CATD_HUMAN  | 44535 | 100% | 3  | 3  | 3  | 0.03% | 14.60% |
| FTC133-p16 | (P07339) Cathepsin D precursor (EC 3.4.23.5) [Contains: Cathepsin D light chain; Cathepsin D heavy chain]                                              | CATD_HUMAN  | 44535 | 100% | 5  | 5  | 40 | 0.40% | 18.40% |
| FTC133-p16 | (P07339) Cathepsin D precursor (EC 3.4.23.5) [Contains: Cathepsin D light chain; Cathepsin D heavy chain]                                              | CATD_HUMAN  | 44535 | 100% | 13 | 15 | 45 | 0.47% | 45.40% |
| FTC133-p16 | (P07339) Cathepsin D precursor (EC 3.4.23.5) [Contains: Cathepsin D light chain; Cathepsin D heavy chain]                                              | CATD_HUMAN  | 44535 | 100% | 2  | 2  | 3  | 0.03% | 7.77%  |
| FTC133-p16 | (P07339) Cathepsin D precursor (EC 3.4.23.5) [Contains: Cathepsin D light chain; Cathepsin D heavy chain]                                              | CATD_HUMAN  | 44535 | 100% | 5  | 7  | 13 | 0.11% | 19.70% |
| FTC133-p16 | (P07339) Cathepsin D precursor (EC 3.4.23.5) [Contains: Cathepsin D light chain; Cathepsin D heavy chain]                                              | CATD_HUMAN  | 44535 | 100% | 3  | 4  | 15 | 0.13% | 12.10% |
| FTC133-p16 | (P07339) Cathepsin D precursor (EC 3.4.23.5) [Contains: Cathepsin D light chain; Cathepsin D heavy chain]                                              | CATD_HUMAN  | 44535 | 100% | 5  | 8  | 47 | 0.40% | 17.00% |
| FTC133-p16 | (P07339) Cathepsin D precursor (EC 3.4.23.5) [Contains: Cathepsin D light chain; Cathepsin D heavy chain]                                              | CATD_HUMAN  | 44535 | 100% | 4  | 5  | 12 | 0.10% | 15.30% |
| FTC133-p16 | (P07339) Cathepsin D precursor (EC 3.4.23.5) [Contains: Cathepsin D light chain; Cathepsin D heavy chain]                                              | CATD_HUMAN  | 44535 | 100% | 2  | 3  | 5  | 0.04% | 10.90% |
| FTC133-p16 | (P07339) Cathepsin D precursor (EC 3.4.23.5) [Contains: Cathepsin D light chain; Cathepsin D heavy chain]                                              | CATD_HUMAN  | 44535 | 100% | 2  | 4  | 8  | 0.07% | 11.90% |
| FTC133-p16 | (P07339) Cathepsin D precursor (EC 3.4.23.5) [Contains: Cathepsin D light chain; Cathepsin D heavy chain]                                              | CATD_HUMAN  | 44535 | 100% | 13 | 16 | 29 | 0.27% | 50.00% |
| FTC133-p16 | (P07339) Cathepsin D precursor (EC 3.4.23.5) [Contains: Cathepsin D light chain; Cathepsin D heavy chain]                                              | CATD_HUMAN  | 44535 | 100% | 12 | 15 | 45 | 0.50% | 39.10% |
| FTC133-p16 | (P07339) Cathepsin D precursor (EC 3.4.23.5) [Contains: Cathepsin D light chain; Cathepsin D heavy chain]                                              | CATD_HUMAN  | 44535 | 100% | 12 | 15 | 35 | 0.41% | 46.60% |
| FTC133-p16 | (P07339) Cathepsin D precursor (EC 3.4.23.5) [Contains: Cathepsin D light chain; Cathepsin D heavy chain]                                              | CATD_HUMAN  | 44535 | 100% | 10 | 11 | 23 | 0.27% | 36.70% |
| FTC133-p16 | (P07339) Cathepsin D precursor (EC 3.4.23.5) [Contains: Cathepsin D light chain; Cathepsin D heavy chain]                                              | CATD_HUMAN  | 44535 | 100% | 3  | 3  | 13 | 0.19% | 14.60% |
| FTC133-p16 | (P07339) Cathepsin D precursor (EC 3.4.23.5) [Contains: Cathepsin D light chain; Cathepsin D heavy chain]                                              | CATD_HUMAN  | 44535 | 100% | 13 | 17 | 69 | 0.63% | 45.60% |

Protein Identified Sequence Coverage in FTC-133

|            |                                                                                                                                                             |             |       |      |    |    |    |       |        |
|------------|-------------------------------------------------------------------------------------------------------------------------------------------------------------|-------------|-------|------|----|----|----|-------|--------|
| FTC133-p16 | (P07355) Annexin A2 (Annexin II) (Lipocortin II) (Calpactin I heavy chain) (Chromobindin-8) (p36) (Protein I) (Placental anticoagulant protein IV) (PAP-IV) | ANXA2_HUMAN | 38457 | 100% | 2  | 2  | 3  | 0.03% | 8.88%  |
| FTC133-p16 | (P07355) Annexin A2 (Annexin II) (Lipocortin II) (Calpactin I heavy chain) (Chromobindin-8) (p36) (Protein I) (Placental anticoagulant protein IV) (PAP-IV) | ANXA2_HUMAN | 38457 | 100% | 5  | 5  | 6  | 0.06% | 23.10% |
| FTC133-p16 | (P07355) Annexin A2 (Annexin II) (Lipocortin II) (Calpactin I heavy chain) (Chromobindin-8) (p36) (Protein I) (Placental anticoagulant protein IV) (PAP-IV) | ANXA2_HUMAN | 38457 | 100% | 10 | 12 | 35 | 0.30% | 34.00% |
| FTC133-p16 | (P07355) Annexin A2 (Annexin II) (Lipocortin II) (Calpactin I heavy chain) (Chromobindin-8) (p36) (Protein I) (Placental anticoagulant protein IV) (PAP-IV) | ANXA2_HUMAN | 38457 | 100% | 2  | 4  | 18 | 0.15% | 11.80% |
| FTC133-p16 | (P07355) Annexin A2 (Annexin II) (Lipocortin II) (Calpactin I heavy chain) (Chromobindin-8) (p36) (Protein I) (Placental anticoagulant protein IV) (PAP-IV) | ANXA2_HUMAN | 38457 | 100% | 6  | 8  | 37 | 0.31% | 22.50% |
| FTC133-p16 | (P07355) Annexin A2 (Annexin II) (Lipocortin II) (Calpactin I heavy chain) (Chromobindin-8) (p36) (Protein I) (Placental anticoagulant protein IV) (PAP-IV) | ANXA2_HUMAN | 38457 | 100% | 6  | 6  | 7  | 0.06% | 29.90% |
| FTC133-p16 | (P07355) Annexin A2 (Annexin II) (Lipocortin II) (Calpactin I heavy chain) (Chromobindin-8) (p36) (Protein I) (Placental anticoagulant protein IV) (PAP-IV) | ANXA2_HUMAN | 38457 | 100% | 2  | 3  | 5  | 0.04% | 11.80% |
| FTC133-p16 | (P07355) Annexin A2 (Annexin II) (Lipocortin II) (Calpactin I heavy chain) (Chromobindin-8) (p36) (Protein I) (Placental anticoagulant protein IV) (PAP-IV) | ANXA2_HUMAN | 38457 | 100% | 17 | 23 | 39 | 0.36% | 52.10% |
| FTC133-p16 | (P07355) Annexin A2 (Annexin II) (Lipocortin II) (Calpactin I heavy chain) (Chromobindin-8) (p36) (Protein I) (Placental anticoagulant protein IV) (PAP-IV) | ANXA2_HUMAN | 38457 | 100% | 17 | 23 | 49 | 0.55% | 53.80% |
| FTC133-p16 | (P07355) Annexin A2 (Annexin II) (Lipocortin II) (Calpactin I heavy chain) (Chromobindin-8) (p36) (Protein I) (Placental anticoagulant protein IV) (PAP-IV) | ANXA2_HUMAN | 38457 | 100% | 15 | 21 | 32 | 0.38% | 52.10% |
| FTC133-p16 | (P07355) Annexin A2 (Annexin II) (Lipocortin II) (Calpactin I heavy chain) (Chromobindin-8) (p36) (Protein I) (Placental anticoagulant protein IV) (PAP-IV) | ANXA2_HUMAN | 38457 | 100% | 13 | 18 | 39 | 0.46% | 42.60% |
| FTC133-p16 | (P07355) Annexin A2 (Annexin II) (Lipocortin II) (Calpactin I heavy chain) (Chromobindin-8) (p36) (Protein I) (Placental anticoagulant protein IV) (PAP-IV) | ANXA2_HUMAN | 38457 | 100% | 16 | 22 | 69 | 0.63% | 53.00% |
| FTC133-p16 | (P07437) Tubulin beta-2 chain                                                                                                                               | TBB2_HUMAN  | 49653 | 100% | 2  | 2  | 2  | 0.02% | 6.08%  |
| FTC133-p16 | (P07437) Tubulin beta-2 chain                                                                                                                               | TBB2_HUMAN  | 49653 | 100% | 3  | 4  | 4  | 0.03% | 15.10% |
| FTC133-p16 | (P07437) Tubulin beta-2 chain                                                                                                                               | TBB2_HUMAN  | 49653 | 100% | 5  | 7  | 22 | 0.19% | 13.70% |
| FTC133-p16 | (P07437) Tubulin beta-2 chain                                                                                                                               | TBB2_HUMAN  | 49653 | 100% | 4  | 4  | 5  | 0.04% | 24.80% |
| FTC133-p16 | (P07437) Tubulin beta-2 chain                                                                                                                               | TBB2_HUMAN  | 49653 | 100% | 11 | 12 | 19 | 0.17% | 44.60% |
| FTC133-p16 | (P07437) Tubulin beta-2 chain                                                                                                                               | TBB2_HUMAN  | 49653 | 100% | 8  | 9  | 14 | 0.16% | 34.00% |
| FTC133-p16 | (P07437) Tubulin beta-2 chain                                                                                                                               | TBB2_HUMAN  | 49653 | 100% | 7  | 8  | 15 | 0.18% | 34.20% |
| FTC133-p16 | (P07437) Tubulin beta-2 chain                                                                                                                               | TBB2_HUMAN  | 49653 | 100% | 8  | 9  | 16 | 0.19% | 34.70% |
| FTC133-p16 | (P07437) Tubulin beta-2 chain                                                                                                                               | TBB2_HUMAN  | 49653 | 100% | 10 | 11 | 20 | 0.18% | 42.30% |



Protein Identified Sequence Coverage in FTC-133

|            |                                                                                                                                                                                                                                                                  |           |       |      |    |    |     |       |        |
|------------|------------------------------------------------------------------------------------------------------------------------------------------------------------------------------------------------------------------------------------------------------------------|-----------|-------|------|----|----|-----|-------|--------|
| FTC133-p16 | (P07602) Proactivator polypeptide precursor<br>[Contains: Saposin A (Protein A); Saposin B-Val;<br>Saposin B (Sphingolipid activator protein 1) (SAP-1)<br>(Cerebroside sulfate activator) (CSAct) (Dispersin)<br>(Sulfatide/GM1 activator); Saposin C (Co-beta- | SAP_HUMAN | 58094 | 100% | 7  | 10 | 14  | 0.14% | 14.90% |
| FTC133-p16 | (P07602) Proactivator polypeptide precursor<br>[Contains: Saposin A (Protein A); Saposin B-Val;<br>Saposin B (Sphingolipid activator protein 1) (SAP-1)<br>(Cerebroside sulfate activator) (CSAct) (Dispersin)<br>(Sulfatide/GM1 activator); Saposin C (Co-beta- | SAP_HUMAN | 58094 | 100% | 7  | 10 | 19  | 0.19% | 17.70% |
| FTC133-p16 | (P07602) Proactivator polypeptide precursor<br>[Contains: Saposin A (Protein A); Saposin B-Val;<br>Saposin B (Sphingolipid activator protein 1) (SAP-1)<br>(Cerebroside sulfate activator) (CSAct) (Dispersin)<br>(Sulfatide/GM1 activator); Saposin C (Co-beta- | SAP_HUMAN | 58094 | 100% | 12 | 13 | 16  | 0.17% | 30.00% |
| FTC133-p16 | (P07602) Proactivator polypeptide precursor<br>[Contains: Saposin A (Protein A); Saposin B-Val;<br>Saposin B (Sphingolipid activator protein 1) (SAP-1)<br>(Cerebroside sulfate activator) (CSAct) (Dispersin)<br>(Sulfatide/GM1 activator); Saposin C (Co-beta- | SAP_HUMAN | 58094 | 100% | 2  | 2  | 2   | 0.02% | 6.87%  |
| FTC133-p16 | (P07602) Proactivator polypeptide precursor<br>[Contains: Saposin A (Protein A); Saposin B-Val;<br>Saposin B (Sphingolipid activator protein 1) (SAP-1)<br>(Cerebroside sulfate activator) (CSAct) (Dispersin)<br>(Sulfatide/GM1 activator); Saposin C (Co-beta- | SAP_HUMAN | 58094 | 100% | 6  | 7  | 16  | 0.14% | 15.60% |
| FTC133-p16 | (P07602) Proactivator polypeptide precursor<br>[Contains: Saposin A (Protein A); Saposin B-Val;<br>Saposin B (Sphingolipid activator protein 1) (SAP-1)<br>(Cerebroside sulfate activator) (CSAct) (Dispersin)<br>(Sulfatide/GM1 activator); Saposin C (Co-beta- | SAP_HUMAN | 58094 | 100% | 9  | 12 | 152 | 1.28% | 24.00% |
| FTC133-p16 | (P07602) Proactivator polypeptide precursor<br>[Contains: Saposin A (Protein A); Saposin B-Val;<br>Saposin B (Sphingolipid activator protein 1) (SAP-1)<br>(Cerebroside sulfate activator) (CSAct) (Dispersin)<br>(Sulfatide/GM1 activator); Saposin C (Co-beta- | SAP_HUMAN | 58094 | 100% | 6  | 7  | 12  | 0.10% | 19.70% |
| FTC133-p16 | (P07602) Proactivator polypeptide precursor<br>[Contains: Saposin A (Protein A); Saposin B-Val;<br>Saposin B (Sphingolipid activator protein 1) (SAP-1)<br>(Cerebroside sulfate activator) (CSAct) (Dispersin)<br>(Sulfatide/GM1 activator); Saposin C (Co-beta- | SAP_HUMAN | 58094 | 100% | 4  | 5  | 42  | 0.36% | 15.30% |
| FTC133-p16 | (P07602) Proactivator polypeptide precursor<br>[Contains: Saposin A (Protein A); Saposin B-Val;<br>Saposin B (Sphingolipid activator protein 1) (SAP-1)<br>(Cerebroside sulfate activator) (CSAct) (Dispersin)<br>(Sulfatide/GM1 activator); Saposin C (Co-beta- | SAP_HUMAN | 58094 | 100% | 15 | 18 | 59  | 0.54% | 41.60% |

Protein Identified Sequence Coverage in FTC-133

|            |                                                                                                                                                                                                                                                                      |            |       |      |    |    |    |       |        |
|------------|----------------------------------------------------------------------------------------------------------------------------------------------------------------------------------------------------------------------------------------------------------------------|------------|-------|------|----|----|----|-------|--------|
| FTC133-p16 | (P07602) Proactivator polypeptide precursor<br>[Contains: Saposin A (Protein A); Saposin B-Val;<br>Saposin B (Sphingolipid activator protein 1) (SAP-1)<br>(Cerebroside sulfate activator) (CSAct) (Dispersin)<br>(Sulfatide/GM1 activator); Saposin C (Co-beta-     | SAP_HUMAN  | 58094 | 100% | 11 | 15 | 40 | 0.45% | 32.40% |
| FTC133-p16 | (P07602) Proactivator polypeptide precursor<br>[Contains: Saposin A (Protein A); Saposin B-Val;<br>Saposin B (Sphingolipid activator protein 1) (SAP-1)<br>(Cerebroside sulfate activator) (CSAct) (Dispersin)<br>(Sulfatide/GM1 activator); Saposin C (Co-beta-     | SAP_HUMAN  | 58094 | 100% | 9  | 12 | 34 | 0.40% | 29.20% |
| FTC133-p16 | (P07602) Proactivator polypeptide precursor<br>[Contains: Saposin A (Protein A); Saposin B-Val;<br>Saposin B (Sphingolipid activator protein 1) (SAP-1)<br>(Cerebroside sulfate activator) (CSAct) (Dispersin)<br>(Sulfatide/GM1 activator); Saposin C (Co-beta-     | SAP_HUMAN  | 58094 | 100% | 11 | 12 | 35 | 0.41% | 26.10% |
| FTC133-p16 | (P07602) Proactivator polypeptide precursor<br>[Contains: Saposin A (Protein A); Saposin B-Val;<br>Saposin B (Sphingolipid activator protein 1) (SAP-1)<br>(Cerebroside sulfate activator) (CSAct) (Dispersin)<br>(Sulfatide/GM1 activator); Saposin C (Co-beta-     | SAP_HUMAN  | 58094 | 100% | 4  | 4  | 11 | 0.16% | 18.30% |
| FTC133-p16 | (P07602) Proactivator polypeptide precursor<br>[Contains: Saposin A (Protein A); Saposin B-Val;<br>Saposin B (Sphingolipid activator protein 1) (SAP-1)<br>(Cerebroside sulfate activator) (CSAct) (Dispersin)<br>(Sulfatide/GM1 activator); Saposin C (Co-beta-     | SAP_HUMAN  | 58094 | 100% | 12 | 15 | 65 | 0.60% | 32.30% |
| FTC133-p16 | (P07686) Beta-hexosaminidase beta chain precursor<br>(EC 3.2.1.52) (N-acetyl-beta-glucosaminidase) (Beta-<br>N-acetylhexosaminidase) (Hexosaminidase B)<br>(Cervical cancer proto-oncogene 7) (HCC-7)<br>[Contains: Beta-hexosaminidase beta-B chain; Beta-<br>hexos | HEXB_HUMAN | 63095 | 100% | 3  | 3  | 4  | 0.04% | 9.71%  |
| FTC133-p16 | (P07686) Beta-hexosaminidase beta chain precursor<br>(EC 3.2.1.52) (N-acetyl-beta-glucosaminidase) (Beta-<br>N-acetylhexosaminidase) (Hexosaminidase B)<br>(Cervical cancer proto-oncogene 7) (HCC-7)<br>[Contains: Beta-hexosaminidase beta-B chain; Beta-<br>hexos | HEXB_HUMAN | 63095 | 100% | 4  | 4  | 4  | 0.03% | 9.53%  |
| FTC133-p16 | (P07686) Beta-hexosaminidase beta chain precursor<br>(EC 3.2.1.52) (N-acetyl-beta-glucosaminidase) (Beta-<br>N-acetylhexosaminidase) (Hexosaminidase B)<br>(Cervical cancer proto-oncogene 7) (HCC-7)<br>[Contains: Beta-hexosaminidase beta-B chain; Beta-<br>hexos | HEXB_HUMAN | 63095 | 100% | 2  | 2  | 2  | 0.02% | 4.14%  |

## Protein Identified Sequence Coverage in FTC-133

|            |                                                                                                                                                                                                                                                     |             |       |      |   |    |    |       |        |
|------------|-----------------------------------------------------------------------------------------------------------------------------------------------------------------------------------------------------------------------------------------------------|-------------|-------|------|---|----|----|-------|--------|
| FTC133-p16 | (P07686) Beta-hexosaminidase beta chain precursor (EC 3.2.1.52) (N-acetyl-beta-glucosaminidase) (Beta-N-acetylhexosaminidase) (Hexosaminidase B) (Cervical cancer proto-oncogene 7) (HCC-7) [Contains: Beta-hexosaminidase beta-B chain; Beta-hexos | HEXB_HUMAN  | 63095 | 100% | 9 | 11 | 19 | 0.17% | 24.60% |
| FTC133-p16 | (P07686) Beta-hexosaminidase beta chain precursor (EC 3.2.1.52) (N-acetyl-beta-glucosaminidase) (Beta-N-acetylhexosaminidase) (Hexosaminidase B) (Cervical cancer proto-oncogene 7) (HCC-7) [Contains: Beta-hexosaminidase beta-B chain; Beta-hexos | HEXB_HUMAN  | 63095 | 100% | 8 | 10 | 15 | 0.17% | 23.20% |
| FTC133-p16 | (P07686) Beta-hexosaminidase beta chain precursor (EC 3.2.1.52) (N-acetyl-beta-glucosaminidase) (Beta-N-acetylhexosaminidase) (Hexosaminidase B) (Cervical cancer proto-oncogene 7) (HCC-7) [Contains: Beta-hexosaminidase beta-B chain; Beta-hexos | HEXB_HUMAN  | 63095 | 100% | 6 | 6  | 7  | 0.08% | 17.40% |
| FTC133-p16 | (P07686) Beta-hexosaminidase beta chain precursor (EC 3.2.1.52) (N-acetyl-beta-glucosaminidase) (Beta-N-acetylhexosaminidase) (Hexosaminidase B) (Cervical cancer proto-oncogene 7) (HCC-7) [Contains: Beta-hexosaminidase beta-B chain; Beta-hexos | HEXB_HUMAN  | 63095 | 100% | 4 | 4  | 7  | 0.08% | 8.45%  |
| FTC133-p16 | (P07686) Beta-hexosaminidase beta chain precursor (EC 3.2.1.52) (N-acetyl-beta-glucosaminidase) (Beta-N-acetylhexosaminidase) (Hexosaminidase B) (Cervical cancer proto-oncogene 7) (HCC-7) [Contains: Beta-hexosaminidase beta-B chain; Beta-hexos | HEXB_HUMAN  | 63095 | 100% | 9 | 10 | 17 | 0.16% | 22.10% |
| FTC133-p16 | (P07711) Cathepsin L precursor (EC 3.4.22.15) (Major excreted protein) (MEP) [Contains: Cathepsin L heavy chain; Cathepsin L light chain]                                                                                                           | CATL_HUMAN  | 37546 | 100% | 3 | 3  | 5  | 0.04% | 10.80% |
| FTC133-p16 | (P07711) Cathepsin L precursor (EC 3.4.22.15) (Major excreted protein) (MEP) [Contains: Cathepsin L heavy chain; Cathepsin L light chain]                                                                                                           | CATL_HUMAN  | 37546 | 100% | 2 | 2  | 3  | 0.04% | 12.60% |
| FTC133-p16 | (P07737) Profilin-1 (Profilin I)                                                                                                                                                                                                                    | PROF1_HUMAN | 14905 | 100% | 2 | 2  | 3  | 0.03% | 20.10% |
| FTC133-p16 | (P07737) Profilin-1 (Profilin I)                                                                                                                                                                                                                    | PROF1_HUMAN | 14905 | 100% | 2 | 2  | 3  | 0.03% | 31.70% |
| FTC133-p16 | (P07737) Profilin-1 (Profilin I)                                                                                                                                                                                                                    | PROF1_HUMAN | 14905 | 100% | 2 | 2  | 2  | 0.02% | 31.70% |
| FTC133-p16 | (P07737) Profilin-1 (Profilin I)                                                                                                                                                                                                                    | PROF1_HUMAN | 14905 | 100% | 2 | 2  | 3  | 0.04% | 31.70% |
| FTC133-p16 | (P07737) Profilin-1 (Profilin I)                                                                                                                                                                                                                    | PROF1_HUMAN | 14905 | 100% | 3 | 3  | 5  | 0.05% | 41.70% |
| FTC133-p16 | (P07858) Cathepsin B precursor (EC 3.4.22.1) (Cathepsin B1) (APP secretase) (APPS) [Contains: Cathepsin B light chain; Cathepsin B heavy chain]                                                                                                     | CATB_HUMAN  | 37803 | 100% | 2 | 3  | 4  | 0.03% | 11.20% |
| FTC133-p16 | (P07858) Cathepsin B precursor (EC 3.4.22.1) (Cathepsin B1) (APP secretase) (APPS) [Contains: Cathepsin B light chain; Cathepsin B heavy chain]                                                                                                     | CATB_HUMAN  | 37803 | 100% | 6 | 6  | 11 | 0.10% | 21.50% |

## Protein Identified Sequence Coverage in FTC-133

|            |                                                                                                                                                 |             |        |      |    |    |    |       |        |
|------------|-------------------------------------------------------------------------------------------------------------------------------------------------|-------------|--------|------|----|----|----|-------|--------|
| FTC133-p16 | (P07858) Cathepsin B precursor (EC 3.4.22.1) (Cathepsin B1) (APP secretase) (APPS) [Contains: Cathepsin B light chain; Cathepsin B heavy chain] | CATB_HUMAN  | 37803  | 100% | 4  | 4  | 14 | 0.16% | 18.30% |
| FTC133-p16 | (P07858) Cathepsin B precursor (EC 3.4.22.1) (Cathepsin B1) (APP secretase) (APPS) [Contains: Cathepsin B light chain; Cathepsin B heavy chain] | CATB_HUMAN  | 37803  | 100% | 4  | 4  | 13 | 0.15% | 20.60% |
| FTC133-p16 | (P07858) Cathepsin B precursor (EC 3.4.22.1) (Cathepsin B1) (APP secretase) (APPS) [Contains: Cathepsin B light chain; Cathepsin B heavy chain] | CATB_HUMAN  | 37803  | 100% | 2  | 2  | 3  | 0.04% | 8.55%  |
| FTC133-p16 | (P07858) Cathepsin B precursor (EC 3.4.22.1) (Cathepsin B1) (APP secretase) (APPS) [Contains: Cathepsin B light chain; Cathepsin B heavy chain] | CATB_HUMAN  | 37803  | 100% | 3  | 3  | 9  | 0.13% | 16.50% |
| FTC133-p16 | (P07858) Cathepsin B precursor (EC 3.4.22.1) (Cathepsin B1) (APP secretase) (APPS) [Contains: Cathepsin B light chain; Cathepsin B heavy chain] | CATB_HUMAN  | 37803  | 100% | 6  | 6  | 17 | 0.16% | 26.80% |
| FTC133-p16 | (P07900) Heat shock protein HSP 90-alpha (HSP 86) (NY-REN-38 antigen)                                                                           | HS90A_HUMAN | 84514  | 100% | 6  | 6  | 8  | 0.07% | 10.90% |
| FTC133-p16 | (P07900) Heat shock protein HSP 90-alpha (HSP 86) (NY-REN-38 antigen)                                                                           | HS90A_HUMAN | 84514  | 100% | 2  | 4  | 8  | 0.07% | 3.69%  |
| FTC133-p16 | (P07900) Heat shock protein HSP 90-alpha (HSP 86) (NY-REN-38 antigen)                                                                           | HS90A_HUMAN | 84514  | 100% | 2  | 3  | 9  | 0.08% | 5.06%  |
| FTC133-p16 | (P07900) Heat shock protein HSP 90-alpha (HSP 86) (NY-REN-38 antigen)                                                                           | HS90A_HUMAN | 84514  | 100% | 3  | 3  | 5  | 0.04% | 7.11%  |
| FTC133-p16 | (P07900) Heat shock protein HSP 90-alpha (HSP 86) (NY-REN-38 antigen)                                                                           | HS90A_HUMAN | 84514  | 100% | 5  | 5  | 10 | 0.09% | 8.07%  |
| FTC133-p16 | (P07900) Heat shock protein HSP 90-alpha (HSP 86) (NY-REN-38 antigen)                                                                           | HS90A_HUMAN | 84514  | 100% | 5  | 5  | 8  | 0.09% | 8.76%  |
| FTC133-p16 | (P07900) Heat shock protein HSP 90-alpha (HSP 86) (NY-REN-38 antigen)                                                                           | HS90A_HUMAN | 84514  | 100% | 6  | 6  | 10 | 0.12% | 10.40% |
| FTC133-p16 | (P07900) Heat shock protein HSP 90-alpha (HSP 86) (NY-REN-38 antigen)                                                                           | HS90A_HUMAN | 84514  | 100% | 4  | 4  | 6  | 0.07% | 7.52%  |
| FTC133-p16 | (P07900) Heat shock protein HSP 90-alpha (HSP 86) (NY-REN-38 antigen)                                                                           | HS90A_HUMAN | 84514  | 100% | 7  | 7  | 11 | 0.10% | 12.60% |
| FTC133-p16 | (P07942) Laminin beta-1 chain precursor (Laminin B1 chain)                                                                                      | LAMB1_HUMAN | 198045 | 100% | 7  | 9  | 11 | 0.09% | 6.77%  |
| FTC133-p16 | (P07942) Laminin beta-1 chain precursor (Laminin B1 chain)                                                                                      | LAMB1_HUMAN | 198045 | 100% | 2  | 2  | 3  | 0.03% | 3.19%  |
| FTC133-p16 | (P07942) Laminin beta-1 chain precursor (Laminin B1 chain)                                                                                      | LAMB1_HUMAN | 198045 | 100% | 7  | 9  | 19 | 0.16% | 8.85%  |
| FTC133-p16 | (P07942) Laminin beta-1 chain precursor (Laminin B1 chain)                                                                                      | LAMB1_HUMAN | 198045 | 100% | 5  | 6  | 8  | 0.07% | 7.56%  |
| FTC133-p16 | (P07942) Laminin beta-1 chain precursor (Laminin B1 chain)                                                                                      | LAMB1_HUMAN | 198045 | 100% | 4  | 5  | 11 | 0.09% | 5.43%  |
| FTC133-p16 | (P07942) Laminin beta-1 chain precursor (Laminin B1 chain)                                                                                      | LAMB1_HUMAN | 198045 | 100% | 15 | 15 | 21 | 0.19% | 15.20% |
| FTC133-p16 | (P07942) Laminin beta-1 chain precursor (Laminin B1 chain)                                                                                      | LAMB1_HUMAN | 198045 | 100% | 16 | 17 | 20 | 0.22% | 18.00% |
| FTC133-p16 | (P07942) Laminin beta-1 chain precursor (Laminin B1 chain)                                                                                      | LAMB1_HUMAN | 198045 | 100% | 9  | 10 | 11 | 0.13% | 10.20% |
| FTC133-p16 | (P07942) Laminin beta-1 chain precursor (Laminin B1 chain)                                                                                      | LAMB1_HUMAN | 198045 | 100% | 6  | 6  | 11 | 0.13% | 5.49%  |

## Protein Identified Sequence Coverage in FTC-133

|            |                                                                                                                                                                                            |             |        |      |    |    |    |       |        |
|------------|--------------------------------------------------------------------------------------------------------------------------------------------------------------------------------------------|-------------|--------|------|----|----|----|-------|--------|
| FTC133-p16 | (P07942) Laminin beta-1 chain precursor (Laminin B1 chain)                                                                                                                                 | LAMB1_HUMAN | 198045 | 100% | 8  | 8  | 13 | 0.19% | 10.00% |
| FTC133-p16 | (P07942) Laminin beta-1 chain precursor (Laminin B1 chain)                                                                                                                                 | LAMB1_HUMAN | 198045 | 100% | 13 | 14 | 18 | 0.17% | 13.70% |
| FTC133-p16 | (P07954) Fumarate hydratase, mitochondrial precursor (EC 4.2.1.2) (Fumarase)                                                                                                               | FUMH_HUMAN  | 54620  | 100% | 3  | 3  | 3  | 0.03% | 14.10% |
| FTC133-p16 | (P08107) Heat shock 70 kDa protein 1 (HSP70.1) (HSP70-1/HSP70-2)                                                                                                                           | HSP71_HUMAN | 70036  | 100% | 2  | 3  | 3  | 0.03% | 8.42%  |
| FTC133-p16 | (P08107) Heat shock 70 kDa protein 1 (HSP70.1) (HSP70-1/HSP70-2)                                                                                                                           | HSP71_HUMAN | 70036  | 100% | 2  | 2  | 2  | 0.02% | 9.36%  |
| FTC133-p16 | (P08123) Collagen alpha-2(I) chain precursor                                                                                                                                               | CO1A2_HUMAN | 129395 | 100% | 3  | 3  | 3  | 0.03% | 3.59%  |
| FTC133-p16 | (P08174) Complement decay-accelerating factor precursor (CD55 antigen)                                                                                                                     | DAF_HUMAN   | 41382  | 100% | 2  | 2  | 4  | 0.04% | 8.14%  |
| FTC133-p16 | (P08174) Complement decay-accelerating factor precursor (CD55 antigen)                                                                                                                     | DAF_HUMAN   | 41382  | 100% | 3  | 3  | 3  | 0.03% | 15.70% |
| FTC133-p16 | (P08174) Complement decay-accelerating factor precursor (CD55 antigen)                                                                                                                     | DAF_HUMAN   | 41382  | 100% | 2  | 2  | 2  | 0.02% | 12.60% |
| FTC133-p16 | (P08174) Complement decay-accelerating factor precursor (CD55 antigen)                                                                                                                     | DAF_HUMAN   | 41382  | 100% | 2  | 2  | 4  | 0.06% | 12.60% |
| FTC133-p16 | (P08238) Heat shock protein HSP 90-beta (HSP 84) (HSP 90)                                                                                                                                  | HS90B_HUMAN | 83118  | 100% | 2  | 2  | 3  | 0.03% | 7.75%  |
| FTC133-p16 | (P08238) Heat shock protein HSP 90-beta (HSP 84) (HSP 90)                                                                                                                                  | HS90B_HUMAN | 83118  | 100% | 3  | 3  | 4  | 0.04% | 10.20% |
| FTC133-p16 | (P08238) Heat shock protein HSP 90-beta (HSP 84) (HSP 90)                                                                                                                                  | HS90B_HUMAN | 83118  | 100% | 4  | 4  | 4  | 0.04% | 15.20% |
| FTC133-p16 | (P08238) Heat shock protein HSP 90-beta (HSP 84) (HSP 90)                                                                                                                                  | HS90B_HUMAN | 83118  | 100% | 2  | 2  | 2  | 0.02% | 13.00% |
| FTC133-p16 | (P08572) Collagen alpha-2(IV) chain precursor                                                                                                                                              | CO4A2_HUMAN | 167522 | 100% | 3  | 3  | 4  | 0.03% | 4.56%  |
| FTC133-p16 | (P08648) Integrin alpha-5 precursor (Fibronectin receptor alpha subunit) (Integrin alpha-F) (VLA-5) (CD49e antigen) [Contains: Integrin alpha-5 heavy chain; Integrin alpha-5 light chain] | ITA5_HUMAN  | 114521 | 100% | 2  | 2  | 4  | 0.04% | 2.86%  |
| FTC133-p16 | (P08648) Integrin alpha-5 precursor (Fibronectin receptor alpha subunit) (Integrin alpha-F) (VLA-5) (CD49e antigen) [Contains: Integrin alpha-5 heavy chain; Integrin alpha-5 light chain] | ITA5_HUMAN  | 114521 | 100% | 2  | 2  | 3  | 0.03% | 3.72%  |
| FTC133-p16 | (P08648) Integrin alpha-5 precursor (Fibronectin receptor alpha subunit) (Integrin alpha-F) (VLA-5) (CD49e antigen) [Contains: Integrin alpha-5 heavy chain; Integrin alpha-5 light chain] | ITA5_HUMAN  | 114521 | 100% | 2  | 2  | 2  | 0.02% | 3.53%  |
| FTC133-p16 | (P08648) Integrin alpha-5 precursor (Fibronectin receptor alpha subunit) (Integrin alpha-F) (VLA-5) (CD49e antigen) [Contains: Integrin alpha-5 heavy chain; Integrin alpha-5 light chain] | ITA5_HUMAN  | 114521 | 100% | 2  | 2  | 2  | 0.02% | 4.77%  |
| FTC133-p16 | (P08648) Integrin alpha-5 precursor (Fibronectin receptor alpha subunit) (Integrin alpha-F) (VLA-5) (CD49e antigen) [Contains: Integrin alpha-5 heavy chain; Integrin alpha-5 light chain] | ITA5_HUMAN  | 114521 | 100% | 3  | 3  | 3  | 0.03% | 5.24%  |
| FTC133-p16 | (P08648) Integrin alpha-5 precursor (Fibronectin receptor alpha subunit) (Integrin alpha-F) (VLA-5) (CD49e antigen) [Contains: Integrin alpha-5 heavy chain; Integrin alpha-5 light chain] | ITA5_HUMAN  | 114521 | 100% | 2  | 2  | 4  | 0.03% | 4.96%  |
| FTC133-p16 | (P08648) Integrin alpha-5 precursor (Fibronectin receptor alpha subunit) (Integrin alpha-F) (VLA-5) (CD49e antigen) [Contains: Integrin alpha-5 heavy chain; Integrin alpha-5 light chain] | ITA5_HUMAN  | 114521 | 100% | 7  | 7  | 9  | 0.08% | 11.20% |

Protein Identified Sequence Coverage in FTC-133

|            |                                                                                                                                                                                                                               |             |        |      |    |    |    |       |        |
|------------|-------------------------------------------------------------------------------------------------------------------------------------------------------------------------------------------------------------------------------|-------------|--------|------|----|----|----|-------|--------|
| FTC133-p16 | (P08648) Integrin alpha-5 precursor (Fibronectin receptor alpha subunit) (Integrin alpha-F) (VLA-5) (CD49e antigen) [Contains: Integrin alpha-5 heavy chain; Integrin alpha-5 light chain]                                    | ITA5_HUMAN  | 114521 | 100% | 7  | 7  | 7  | 0.08% | 13.20% |
| FTC133-p16 | (P08648) Integrin alpha-5 precursor (Fibronectin receptor alpha subunit) (Integrin alpha-F) (VLA-5) (CD49e antigen) [Contains: Integrin alpha-5 heavy chain; Integrin alpha-5 light chain]                                    | ITA5_HUMAN  | 114521 | 100% | 5  | 5  | 5  | 0.06% | 10.00% |
| FTC133-p16 | (P08648) Integrin alpha-5 precursor (Fibronectin receptor alpha subunit) (Integrin alpha-F) (VLA-5) (CD49e antigen) [Contains: Integrin alpha-5 heavy chain; Integrin alpha-5 light chain]                                    | ITA5_HUMAN  | 114521 | 100% | 3  | 3  | 5  | 0.06% | 4.29%  |
| FTC133-p16 | (P08648) Integrin alpha-5 precursor (Fibronectin receptor alpha subunit) (Integrin alpha-F) (VLA-5) (CD49e antigen) [Contains: Integrin alpha-5 heavy chain; Integrin alpha-5 light chain]                                    | ITA5_HUMAN  | 114521 | 100% | 2  | 2  | 3  | 0.04% | 5.72%  |
| FTC133-p16 | (P08648) Integrin alpha-5 precursor (Fibronectin receptor alpha subunit) (Integrin alpha-F) (VLA-5) (CD49e antigen) [Contains: Integrin alpha-5 heavy chain; Integrin alpha-5 light chain]                                    | ITA5_HUMAN  | 114521 | 100% | 5  | 5  | 5  | 0.05% | 8.48%  |
| FTC133-p16 | (P08670) Vimentin                                                                                                                                                                                                             | VIME_HUMAN  | 53503  | 100% | 3  | 3  | 5  | 0.06% | 7.31%  |
| FTC133-p16 | (P08670) Vimentin                                                                                                                                                                                                             | VIME_HUMAN  | 53503  | 100% | 2  | 2  | 4  | 0.06% | 8.17%  |
| FTC133-p16 | (P08758) Annexin A5 (Annexin V) (Lipocortin V) (Endonexin II) (Calphobindin I) (CBP-I) (Placental anticoagulant protein I) (PAP-I) (PP4) (Thromboplastin inhibitor) (Vascular anticoagulant-alpha) (VAC-alpha) (Anchorin CII) | ANXA5_HUMAN | 35789  | 100% | 7  | 9  | 15 | 0.13% | 36.70% |
| FTC133-p16 | (P08758) Annexin A5 (Annexin V) (Lipocortin V) (Endonexin II) (Calphobindin I) (CBP-I) (Placental anticoagulant protein I) (PAP-I) (PP4) (Thromboplastin inhibitor) (Vascular anticoagulant-alpha) (VAC-alpha) (Anchorin CII) | ANXA5_HUMAN | 35789  | 100% | 7  | 11 | 44 | 0.37% | 37.90% |
| FTC133-p16 | (P08758) Annexin A5 (Annexin V) (Lipocortin V) (Endonexin II) (Calphobindin I) (CBP-I) (Placental anticoagulant protein I) (PAP-I) (PP4) (Thromboplastin inhibitor) (Vascular anticoagulant-alpha) (VAC-alpha) (Anchorin CII) | ANXA5_HUMAN | 35789  | 100% | 2  | 3  | 5  | 0.04% | 9.09%  |
| FTC133-p16 | (P08758) Annexin A5 (Annexin V) (Lipocortin V) (Endonexin II) (Calphobindin I) (CBP-I) (Placental anticoagulant protein I) (PAP-I) (PP4) (Thromboplastin inhibitor) (Vascular anticoagulant-alpha) (VAC-alpha) (Anchorin CII) | ANXA5_HUMAN | 35789  | 100% | 2  | 2  | 6  | 0.05% | 16.90% |
| FTC133-p16 | (P08758) Annexin A5 (Annexin V) (Lipocortin V) (Endonexin II) (Calphobindin I) (CBP-I) (Placental anticoagulant protein I) (PAP-I) (PP4) (Thromboplastin inhibitor) (Vascular anticoagulant-alpha) (VAC-alpha) (Anchorin CII) | ANXA5_HUMAN | 35789  | 100% | 15 | 17 | 30 | 0.28% | 55.50% |
| FTC133-p16 | (P08758) Annexin A5 (Annexin V) (Lipocortin V) (Endonexin II) (Calphobindin I) (CBP-I) (Placental anticoagulant protein I) (PAP-I) (PP4) (Thromboplastin inhibitor) (Vascular anticoagulant-alpha) (VAC-alpha) (Anchorin CII) | ANXA5_HUMAN | 35789  | 100% | 14 | 15 | 30 | 0.33% | 53.00% |
| FTC133-p16 | (P08758) Annexin A5 (Annexin V) (Lipocortin V) (Endonexin II) (Calphobindin I) (CBP-I) (Placental anticoagulant protein I) (PAP-I) (PP4) (Thromboplastin inhibitor) (Vascular anticoagulant-alpha) (VAC-alpha) (Anchorin CII) | ANXA5_HUMAN | 35789  | 100% | 13 | 16 | 31 | 0.37% | 51.40% |

Protein Identified Sequence Coverage in FTC-133

|            |                                                                                                                                                                                                                               |             |       |      |    |    |    |       |        |
|------------|-------------------------------------------------------------------------------------------------------------------------------------------------------------------------------------------------------------------------------|-------------|-------|------|----|----|----|-------|--------|
| FTC133-p16 | (P08758) Annexin A5 (Annexin V) (Lipocortin V) (Endonexin II) (Calphobindin I) (CBP-I) (Placental anticoagulant protein I) (PAP-I) (PP4) (Thromboplastin inhibitor) (Vascular anticoagulant-alpha) (VAC-alpha) (Anchorin CII) | ANXA5_HUMAN | 35789 | 100% | 7  | 9  | 16 | 0.19% | 29.50% |
| FTC133-p16 | (P08758) Annexin A5 (Annexin V) (Lipocortin V) (Endonexin II) (Calphobindin I) (CBP-I) (Placental anticoagulant protein I) (PAP-I) (PP4) (Thromboplastin inhibitor) (Vascular anticoagulant-alpha) (VAC-alpha) (Anchorin CII) | ANXA5_HUMAN | 35789 | 100% | 5  | 5  | 12 | 0.17% | 29.50% |
| FTC133-p16 | (P08758) Annexin A5 (Annexin V) (Lipocortin V) (Endonexin II) (Calphobindin I) (CBP-I) (Placental anticoagulant protein I) (PAP-I) (PP4) (Thromboplastin inhibitor) (Vascular anticoagulant-alpha) (VAC-alpha) (Anchorin CII) | ANXA5_HUMAN | 35789 | 100% | 13 | 16 | 38 | 0.35% | 53.00% |
| FTC133-p16 | (P08865) 40S ribosomal protein SA (p40) (34/67 kDa laminin receptor) (Colon carcinoma laminin-binding protein) (NEM/1CHD4) (Multidrug resistance-associated protein MGr1-Ag)                                                  | RSSA_HUMAN  | 32705 | 100% | 2  | 2  | 4  | 0.03% | 9.52%  |
| FTC133-p16 | (P08865) 40S ribosomal protein SA (p40) (34/67 kDa laminin receptor) (Colon carcinoma laminin-binding protein) (NEM/1CHD4) (Multidrug resistance-associated protein MGr1-Ag)                                                  | RSSA_HUMAN  | 32705 | 100% | 3  | 5  | 9  | 0.08% | 17.70% |
| FTC133-p16 | (P08865) 40S ribosomal protein SA (p40) (34/67 kDa laminin receptor) (Colon carcinoma laminin-binding protein) (NEM/1CHD4) (Multidrug resistance-associated protein MGr1-Ag)                                                  | RSSA_HUMAN  | 32705 | 100% | 2  | 4  | 13 | 0.11% | 17.00% |
| FTC133-p16 | (P08865) 40S ribosomal protein SA (p40) (34/67 kDa laminin receptor) (Colon carcinoma laminin-binding protein) (NEM/1CHD4) (Multidrug resistance-associated protein MGr1-Ag)                                                  | RSSA_HUMAN  | 32705 | 100% | 2  | 2  | 9  | 0.08% | 17.00% |
| FTC133-p16 | (P08865) 40S ribosomal protein SA (p40) (34/67 kDa laminin receptor) (Colon carcinoma laminin-binding protein) (NEM/1CHD4) (Multidrug resistance-associated protein MGr1-Ag)                                                  | RSSA_HUMAN  | 32705 | 100% | 10 | 11 | 26 | 0.24% | 52.40% |
| FTC133-p16 | (P08865) 40S ribosomal protein SA (p40) (34/67 kDa laminin receptor) (Colon carcinoma laminin-binding protein) (NEM/1CHD4) (Multidrug resistance-associated protein MGr1-Ag)                                                  | RSSA_HUMAN  | 32705 | 100% | 7  | 9  | 15 | 0.17% | 41.50% |
| FTC133-p16 | (P08865) 40S ribosomal protein SA (p40) (34/67 kDa laminin receptor) (Colon carcinoma laminin-binding protein) (NEM/1CHD4) (Multidrug resistance-associated protein MGr1-Ag)                                                  | RSSA_HUMAN  | 32705 | 100% | 10 | 12 | 22 | 0.26% | 48.60% |
| FTC133-p16 | (P08865) 40S ribosomal protein SA (p40) (34/67 kDa laminin receptor) (Colon carcinoma laminin-binding protein) (NEM/1CHD4) (Multidrug resistance-associated protein MGr1-Ag)                                                  | RSSA_HUMAN  | 32705 | 100% | 8  | 9  | 17 | 0.20% | 40.80% |
| FTC133-p16 | (P08865) 40S ribosomal protein SA (p40) (34/67 kDa laminin receptor) (Colon carcinoma laminin-binding protein) (NEM/1CHD4) (Multidrug resistance-associated protein MGr1-Ag)                                                  | RSSA_HUMAN  | 32705 | 100% | 2  | 2  | 4  | 0.06% | 17.00% |
| FTC133-p16 | (P08865) 40S ribosomal protein SA (p40) (34/67 kDa laminin receptor) (Colon carcinoma laminin-binding protein) (NEM/1CHD4) (Multidrug resistance-associated protein MGr1-Ag)                                                  | RSSA_HUMAN  | 32705 | 100% | 10 | 12 | 23 | 0.21% | 52.40% |

## Protein Identified Sequence Coverage in FTC-133

|            |                                                                                                                                                                                                                                |             |        |      |   |   |    |       |        |
|------------|--------------------------------------------------------------------------------------------------------------------------------------------------------------------------------------------------------------------------------|-------------|--------|------|---|---|----|-------|--------|
| FTC133-p16 | (P09104) Gamma-enolase (EC 4.2.1.11) (2-phospho-D-glycerate hydro-lyase) (Neural enolase) (Neuron-specific enolase) (NSE) (Enolase 2)                                                                                          | ENOG_HUMAN  | 47121  | 100% | 2 | 2 | 3  | 0.03% | 16.20% |
| FTC133-p16 | (P09382) Galectin-1 (Lectin galactoside-binding soluble 1) (Beta-galactoside-binding lectin L-14-l) (Lactose-binding lectin 1) (S-Lac lectin 1) (Galaptin) (14 kDa lectin) (HPL) (HBL) (Putative MAPK-activating protein MP12) | LEG1_HUMAN  | 14567  | 100% | 2 | 4 | 8  | 0.07% | 31.30% |
| FTC133-p16 | (P09382) Galectin-1 (Lectin galactoside-binding soluble 1) (Beta-galactoside-binding lectin L-14-l) (Lactose-binding lectin 1) (S-Lac lectin 1) (Galaptin) (14 kDa lectin) (HPL) (HBL) (Putative MAPK-activating protein MP12) | LEG1_HUMAN  | 14567  | 100% | 4 | 4 | 9  | 0.08% | 43.30% |
| FTC133-p16 | (P09382) Galectin-1 (Lectin galactoside-binding soluble 1) (Beta-galactoside-binding lectin L-14-l) (Lactose-binding lectin 1) (S-Lac lectin 1) (Galaptin) (14 kDa lectin) (HPL) (HBL) (Putative MAPK-activating protein MP12) | LEG1_HUMAN  | 14567  | 100% | 4 | 4 | 8  | 0.09% | 43.30% |
| FTC133-p16 | (P09382) Galectin-1 (Lectin galactoside-binding soluble 1) (Beta-galactoside-binding lectin L-14-l) (Lactose-binding lectin 1) (S-Lac lectin 1) (Galaptin) (14 kDa lectin) (HPL) (HBL) (Putative MAPK-activating protein MP12) | LEG1_HUMAN  | 14567  | 100% | 2 | 2 | 4  | 0.05% | 31.30% |
| FTC133-p16 | (P09382) Galectin-1 (Lectin galactoside-binding soluble 1) (Beta-galactoside-binding lectin L-14-l) (Lactose-binding lectin 1) (S-Lac lectin 1) (Galaptin) (14 kDa lectin) (HPL) (HBL) (Putative MAPK-activating protein MP12) | LEG1_HUMAN  | 14567  | 100% | 4 | 4 | 8  | 0.07% | 43.30% |
| FTC133-p16 | (P09429) High mobility group protein B1 (High mobility group protein 1) (HMG-1)                                                                                                                                                | HMGB1_HUMAN | 24746  | 100% | 4 | 5 | 7  | 0.06% | 27.60% |
| FTC133-p16 | (P09429) High mobility group protein B1 (High mobility group protein 1) (HMG-1)                                                                                                                                                | HMGB1_HUMAN | 24746  | 100% | 2 | 2 | 3  | 0.04% | 12.60% |
| FTC133-p16 | (P09661) U2 small nuclear ribonucleoprotein A' (U2 snRNP-A')                                                                                                                                                                   | RU2A_HUMAN  | 28399  | 100% | 4 | 4 | 5  | 0.04% | 35.70% |
| FTC133-p16 | (P09661) U2 small nuclear ribonucleoprotein A' (U2 snRNP-A')                                                                                                                                                                   | RU2A_HUMAN  | 28399  | 100% | 5 | 7 | 12 | 0.10% | 40.00% |
| FTC133-p16 | (P09661) U2 small nuclear ribonucleoprotein A' (U2 snRNP-A')                                                                                                                                                                   | RU2A_HUMAN  | 28399  | 100% | 2 | 2 | 2  | 0.02% | 23.50% |
| FTC133-p16 | (P09661) U2 small nuclear ribonucleoprotein A' (U2 snRNP-A')                                                                                                                                                                   | RU2A_HUMAN  | 28399  | 100% | 2 | 2 | 2  | 0.02% | 9.80%  |
| FTC133-p16 | (P0C0S5) Histone H2A.Z (H2A/z)                                                                                                                                                                                                 | H2AZ_HUMAN  | 13404  | 100% | 2 | 2 | 3  | 0.03% | 36.20% |
| FTC133-p16 | (P0C0S5) Histone H2A.Z (H2A/z)                                                                                                                                                                                                 | H2AZ_HUMAN  | 13404  | 100% | 3 | 3 | 10 | 0.09% | 20.50% |
| FTC133-p16 | (P0C0S5) Histone H2A.Z (H2A/z)                                                                                                                                                                                                 | H2AZ_HUMAN  | 13404  | 100% | 3 | 3 | 7  | 0.08% | 20.50% |
| FTC133-p16 | (P0C0S5) Histone H2A.Z (H2A/z)                                                                                                                                                                                                 | H2AZ_HUMAN  | 13404  | 100% | 4 | 4 | 29 | 0.27% | 31.50% |
| FTC133-p16 | (P10253) Lysosomal alpha-glucosidase precursor (EC 3.2.1.20) (Acid maltase) (Aglucosidase alfa) [Contains: 76 kDa lysosomal alpha-glucosidase; 70 kDa lysosomal alpha-glucosidase]                                             | LYAG_HUMAN  | 105321 | 100% | 2 | 2 | 3  | 0.03% | 3.99%  |
| FTC133-p16 | (P10253) Lysosomal alpha-glucosidase precursor (EC 3.2.1.20) (Acid maltase) (Aglucosidase alfa) [Contains: 76 kDa lysosomal alpha-glucosidase; 70 kDa lysosomal alpha-glucosidase]                                             | LYAG_HUMAN  | 105321 | 100% | 8 | 8 | 12 | 0.13% | 14.40% |



## Protein Identified Sequence Coverage in FTC-133

|            |                                                                                                                                                                                                                                               |            |       |      |   |   |    |       |        |
|------------|-----------------------------------------------------------------------------------------------------------------------------------------------------------------------------------------------------------------------------------------------|------------|-------|------|---|---|----|-------|--------|
| FTC133-p16 | (P10619) Lysosomal protective protein precursor (EC 3.4.16.5) (Cathepsin A) (Carboxypeptidase C) (Protective protein for beta-galactosidase) [Contains: Lysosomal protective protein 32 kDa chain; Lysosomal protective protein 20 kDa chain] | PPGB_HUMAN | 54450 | 100% | 4 | 4 | 8  | 0.08% | 12.70% |
| FTC133-p16 | (P10619) Lysosomal protective protein precursor (EC 3.4.16.5) (Cathepsin A) (Carboxypeptidase C) (Protective protein for beta-galactosidase) [Contains: Lysosomal protective protein 32 kDa chain; Lysosomal protective protein 20 kDa chain] | PPGB_HUMAN | 54450 | 100% | 2 | 2 | 4  | 0.03% | 5.42%  |
| FTC133-p16 | (P10619) Lysosomal protective protein precursor (EC 3.4.16.5) (Cathepsin A) (Carboxypeptidase C) (Protective protein for beta-galactosidase) [Contains: Lysosomal protective protein 32 kDa chain; Lysosomal protective protein 20 kDa chain] | PPGB_HUMAN | 54450 | 100% | 3 | 3 | 4  | 0.03% | 8.33%  |
| FTC133-p16 | (P10619) Lysosomal protective protein precursor (EC 3.4.16.5) (Cathepsin A) (Carboxypeptidase C) (Protective protein for beta-galactosidase) [Contains: Lysosomal protective protein 32 kDa chain; Lysosomal protective protein 20 kDa chain] | PPGB_HUMAN | 54450 | 100% | 4 | 5 | 8  | 0.07% | 12.70% |
| FTC133-p16 | (P10619) Lysosomal protective protein precursor (EC 3.4.16.5) (Cathepsin A) (Carboxypeptidase C) (Protective protein for beta-galactosidase) [Contains: Lysosomal protective protein 32 kDa chain; Lysosomal protective protein 20 kDa chain] | PPGB_HUMAN | 54450 | 100% | 4 | 4 | 6  | 0.07% | 12.50% |
| FTC133-p16 | (P10619) Lysosomal protective protein precursor (EC 3.4.16.5) (Cathepsin A) (Carboxypeptidase C) (Protective protein for beta-galactosidase) [Contains: Lysosomal protective protein 32 kDa chain; Lysosomal protective protein 20 kDa chain] | PPGB_HUMAN | 54450 | 100% | 3 | 4 | 6  | 0.07% | 9.79%  |
| FTC133-p16 | (P10619) Lysosomal protective protein precursor (EC 3.4.16.5) (Cathepsin A) (Carboxypeptidase C) (Protective protein for beta-galactosidase) [Contains: Lysosomal protective protein 32 kDa chain; Lysosomal protective protein 20 kDa chain] | PPGB_HUMAN | 54450 | 100% | 3 | 3 | 5  | 0.06% | 9.79%  |
| FTC133-p16 | (P10619) Lysosomal protective protein precursor (EC 3.4.16.5) (Cathepsin A) (Carboxypeptidase C) (Protective protein for beta-galactosidase) [Contains: Lysosomal protective protein 32 kDa chain; Lysosomal protective protein 20 kDa chain] | PPGB_HUMAN | 54450 | 100% | 3 | 3 | 4  | 0.04% | 7.71%  |
| FTC133-p16 | (P10809) 60 kDa heat shock protein, mitochondrial precursor (Hsp60) (60 kDa chaperonin) (CPN60) (Heat shock protein 60) (HSP-60) (Mitochondrial matrix protein P1) (P60 lymphocyte protein) (HuCHA60)                                         | CH60_HUMAN | 61038 | 100% | 8 | 9 | 17 | 0.15% | 23.00% |

## Protein Identified Sequence Coverage in FTC-133

|            |                                                                                                                                                                                                       |            |       |      |    |    |    |       |        |
|------------|-------------------------------------------------------------------------------------------------------------------------------------------------------------------------------------------------------|------------|-------|------|----|----|----|-------|--------|
| FTC133-p16 | (P10809) 60 kDa heat shock protein, mitochondrial precursor (Hsp60) (60 kDa chaperonin) (CPN60) (Heat shock protein 60) (HSP-60) (Mitochondrial matrix protein P1) (P60 lymphocyte protein) (HuCHA60) | CH60_HUMAN | 61038 | 100% | 2  | 2  | 17 | 0.15% | 8.73%  |
| FTC133-p16 | (P10809) 60 kDa heat shock protein, mitochondrial precursor (Hsp60) (60 kDa chaperonin) (CPN60) (Heat shock protein 60) (HSP-60) (Mitochondrial matrix protein P1) (P60 lymphocyte protein) (HuCHA60) | CH60_HUMAN | 61038 | 100% | 7  | 10 | 53 | 0.45% | 23.90% |
| FTC133-p16 | (P10809) 60 kDa heat shock protein, mitochondrial precursor (Hsp60) (60 kDa chaperonin) (CPN60) (Heat shock protein 60) (HSP-60) (Mitochondrial matrix protein P1) (P60 lymphocyte protein) (HuCHA60) | CH60_HUMAN | 61038 | 100% | 4  | 5  | 11 | 0.10% | 13.40% |
| FTC133-p16 | (P10809) 60 kDa heat shock protein, mitochondrial precursor (Hsp60) (60 kDa chaperonin) (CPN60) (Heat shock protein 60) (HSP-60) (Mitochondrial matrix protein P1) (P60 lymphocyte protein) (HuCHA60) | CH60_HUMAN | 61038 | 100% | 7  | 11 | 94 | 0.80% | 22.00% |
| FTC133-p16 | (P10809) 60 kDa heat shock protein, mitochondrial precursor (Hsp60) (60 kDa chaperonin) (CPN60) (Heat shock protein 60) (HSP-60) (Mitochondrial matrix protein P1) (P60 lymphocyte protein) (HuCHA60) | CH60_HUMAN | 61038 | 100% | 4  | 4  | 14 | 0.12% | 17.30% |
| FTC133-p16 | (P10809) 60 kDa heat shock protein, mitochondrial precursor (Hsp60) (60 kDa chaperonin) (CPN60) (Heat shock protein 60) (HSP-60) (Mitochondrial matrix protein P1) (P60 lymphocyte protein) (HuCHA60) | CH60_HUMAN | 61038 | 100% | 11 | 15 | 26 | 0.24% | 29.10% |
| FTC133-p16 | (P10809) 60 kDa heat shock protein, mitochondrial precursor (Hsp60) (60 kDa chaperonin) (CPN60) (Heat shock protein 60) (HSP-60) (Mitochondrial matrix protein P1) (P60 lymphocyte protein) (HuCHA60) | CH60_HUMAN | 61038 | 100% | 8  | 10 | 18 | 0.20% | 25.00% |
| FTC133-p16 | (P10809) 60 kDa heat shock protein, mitochondrial precursor (Hsp60) (60 kDa chaperonin) (CPN60) (Heat shock protein 60) (HSP-60) (Mitochondrial matrix protein P1) (P60 lymphocyte protein) (HuCHA60) | CH60_HUMAN | 61038 | 100% | 7  | 9  | 16 | 0.19% | 22.90% |
| FTC133-p16 | (P10809) 60 kDa heat shock protein, mitochondrial precursor (Hsp60) (60 kDa chaperonin) (CPN60) (Heat shock protein 60) (HSP-60) (Mitochondrial matrix protein P1) (P60 lymphocyte protein) (HuCHA60) | CH60_HUMAN | 61038 | 100% | 6  | 6  | 10 | 0.12% | 16.10% |
| FTC133-p16 | (P10809) 60 kDa heat shock protein, mitochondrial precursor (Hsp60) (60 kDa chaperonin) (CPN60) (Heat shock protein 60) (HSP-60) (Mitochondrial matrix protein P1) (P60 lymphocyte protein) (HuCHA60) | CH60_HUMAN | 61038 | 100% | 7  | 7  | 10 | 0.14% | 26.50% |
| FTC133-p16 | (P10809) 60 kDa heat shock protein, mitochondrial precursor (Hsp60) (60 kDa chaperonin) (CPN60) (Heat shock protein 60) (HSP-60) (Mitochondrial matrix protein P1) (P60 lymphocyte protein) (HuCHA60) | CH60_HUMAN | 61038 | 100% | 11 | 14 | 20 | 0.18% | 27.60% |

## Protein Identified Sequence Coverage in FTC-133

|            |                                                                                                                                                                              |             |        |      |    |    |     |       |        |
|------------|------------------------------------------------------------------------------------------------------------------------------------------------------------------------------|-------------|--------|------|----|----|-----|-------|--------|
| FTC133-p16 | (P11021) 78 kDa glucose-regulated protein precursor (GRP 78) (Immunoglobulin heavy chain-binding protein) (BiP) (Endoplasmic reticulum lumenal Ca(2+)-binding protein grp78) | GRP78_HUMAN | 72317  | 100% | 2  | 2  | 2   | 0.02% | 4.43%  |
| FTC133-p16 | (P11021) 78 kDa glucose-regulated protein precursor (GRP 78) (Immunoglobulin heavy chain-binding protein) (BiP) (Endoplasmic reticulum lumenal Ca(2+)-binding protein grp78) | GRP78_HUMAN | 72317  | 100% | 17 | 20 | 58  | 0.50% | 39.90% |
| FTC133-p16 | (P11021) 78 kDa glucose-regulated protein precursor (GRP 78) (Immunoglobulin heavy chain-binding protein) (BiP) (Endoplasmic reticulum lumenal Ca(2+)-binding protein grp78) | GRP78_HUMAN | 72317  | 100% | 6  | 6  | 134 | 1.13% | 13.90% |
| FTC133-p16 | (P11021) 78 kDa glucose-regulated protein precursor (GRP 78) (Immunoglobulin heavy chain-binding protein) (BiP) (Endoplasmic reticulum lumenal Ca(2+)-binding protein grp78) | GRP78_HUMAN | 72317  | 100% | 3  | 4  | 9   | 0.08% | 7.80%  |
| FTC133-p16 | (P11021) 78 kDa glucose-regulated protein precursor (GRP 78) (Immunoglobulin heavy chain-binding protein) (BiP) (Endoplasmic reticulum lumenal Ca(2+)-binding protein grp78) | GRP78_HUMAN | 72317  | 100% | 3  | 6  | 32  | 0.27% | 7.49%  |
| FTC133-p16 | (P11021) 78 kDa glucose-regulated protein precursor (GRP 78) (Immunoglobulin heavy chain-binding protein) (BiP) (Endoplasmic reticulum lumenal Ca(2+)-binding protein grp78) | GRP78_HUMAN | 72317  | 100% | 2  | 3  | 11  | 0.10% | 5.50%  |
| FTC133-p16 | (P11021) 78 kDa glucose-regulated protein precursor (GRP 78) (Immunoglobulin heavy chain-binding protein) (BiP) (Endoplasmic reticulum lumenal Ca(2+)-binding protein grp78) | GRP78_HUMAN | 72317  | 100% | 27 | 34 | 70  | 0.64% | 47.10% |
| FTC133-p16 | (P11021) 78 kDa glucose-regulated protein precursor (GRP 78) (Immunoglobulin heavy chain-binding protein) (BiP) (Endoplasmic reticulum lumenal Ca(2+)-binding protein grp78) | GRP78_HUMAN | 72317  | 100% | 22 | 30 | 85  | 0.95% | 40.70% |
| FTC133-p16 | (P11021) 78 kDa glucose-regulated protein precursor (GRP 78) (Immunoglobulin heavy chain-binding protein) (BiP) (Endoplasmic reticulum lumenal Ca(2+)-binding protein grp78) | GRP78_HUMAN | 72317  | 100% | 17 | 24 | 62  | 0.73% | 29.70% |
| FTC133-p16 | (P11021) 78 kDa glucose-regulated protein precursor (GRP 78) (Immunoglobulin heavy chain-binding protein) (BiP) (Endoplasmic reticulum lumenal Ca(2+)-binding protein grp78) | GRP78_HUMAN | 72317  | 100% | 15 | 21 | 48  | 0.56% | 28.90% |
| FTC133-p16 | (P11021) 78 kDa glucose-regulated protein precursor (GRP 78) (Immunoglobulin heavy chain-binding protein) (BiP) (Endoplasmic reticulum lumenal Ca(2+)-binding protein grp78) | GRP78_HUMAN | 72317  | 100% | 22 | 31 | 106 | 0.97% | 43.90% |
| FTC133-p16 | (P11047) Laminin gamma-1 chain precursor (Laminin B2 chain)                                                                                                                  | LAMC1_HUMAN | 177587 | 100% | 2  | 2  | 4   | 0.04% | 1.49%  |
| FTC133-p16 | (P11047) Laminin gamma-1 chain precursor (Laminin B2 chain)                                                                                                                  | LAMC1_HUMAN | 177587 | 100% | 2  | 2  | 2   | 0.02% | 2.05%  |
| FTC133-p16 | (P11047) Laminin gamma-1 chain precursor (Laminin B2 chain)                                                                                                                  | LAMC1_HUMAN | 177587 | 100% | 4  | 4  | 4   | 0.03% | 4.16%  |
| FTC133-p16 | (P11047) Laminin gamma-1 chain precursor (Laminin B2 chain)                                                                                                                  | LAMC1_HUMAN | 177587 | 100% | 4  | 4  | 5   | 0.06% | 3.85%  |
| FTC133-p16 | (P11047) Laminin gamma-1 chain precursor (Laminin B2 chain)                                                                                                                  | LAMC1_HUMAN | 177587 | 100% | 6  | 6  | 8   | 0.09% | 5.59%  |
| FTC133-p16 | (P11047) Laminin gamma-1 chain precursor (Laminin B2 chain)                                                                                                                  | LAMC1_HUMAN | 177587 | 100% | 3  | 3  | 4   | 0.06% | 5.72%  |

Protein Identified Sequence Coverage in FTC-133

|            |                                                                                                                                                        |             |        |      |    |    |    |       |        |
|------------|--------------------------------------------------------------------------------------------------------------------------------------------------------|-------------|--------|------|----|----|----|-------|--------|
| FTC133-p16 | (P11047) Laminin gamma-1 chain precursor (Laminin B2 chain)                                                                                            | LAMC1_HUMAN | 177587 | 100% | 3  | 3  | 4  | 0.04% | 3.11%  |
| FTC133-p16 | (P11142) Heat shock cognate 71 kDa protein (Heat shock 70 kDa protein 8)                                                                               | HSP7C_HUMAN | 70882  | 100% | 4  | 5  | 5  | 0.04% | 17.80% |
| FTC133-p16 | (P11142) Heat shock cognate 71 kDa protein (Heat shock 70 kDa protein 8)                                                                               | HSP7C_HUMAN | 70882  | 100% | 2  | 3  | 7  | 0.06% | 9.75%  |
| FTC133-p16 | (P11142) Heat shock cognate 71 kDa protein (Heat shock 70 kDa protein 8)                                                                               | HSP7C_HUMAN | 70882  | 100% | 9  | 11 | 18 | 0.17% | 23.20% |
| FTC133-p16 | (P11142) Heat shock cognate 71 kDa protein (Heat shock 70 kDa protein 8)                                                                               | HSP7C_HUMAN | 70882  | 100% | 7  | 7  | 14 | 0.16% | 18.70% |
| FTC133-p16 | (P11142) Heat shock cognate 71 kDa protein (Heat shock 70 kDa protein 8)                                                                               | HSP7C_HUMAN | 70882  | 100% | 6  | 7  | 13 | 0.15% | 18.70% |
| FTC133-p16 | (P11142) Heat shock cognate 71 kDa protein (Heat shock 70 kDa protein 8)                                                                               | HSP7C_HUMAN | 70882  | 100% | 6  | 6  | 15 | 0.18% | 13.20% |
| FTC133-p16 | (P11142) Heat shock cognate 71 kDa protein (Heat shock 70 kDa protein 8)                                                                               | HSP7C_HUMAN | 70882  | 100% | 2  | 2  | 4  | 0.06% | 7.28%  |
| FTC133-p16 | (P11142) Heat shock cognate 71 kDa protein (Heat shock 70 kDa protein 8)                                                                               | HSP7C_HUMAN | 70882  | 100% | 11 | 12 | 17 | 0.16% | 26.30% |
| FTC133-p16 | (P11166) Solute carrier family 2, facilitated glucose transporter member 1 (Glucose transporter type 1, erythrocyte/brain) (HepG2 glucose transporter) | GTR1_HUMAN  | 54101  | 100% | 2  | 3  | 4  | 0.04% | 7.72%  |
| FTC133-p16 | (P11166) Solute carrier family 2, facilitated glucose transporter member 1 (Glucose transporter type 1, erythrocyte/brain) (HepG2 glucose transporter) | GTR1_HUMAN  | 54101  | 100% | 2  | 2  | 3  | 0.03% | 5.08%  |
| FTC133-p16 | (P11166) Solute carrier family 2, facilitated glucose transporter member 1 (Glucose transporter type 1, erythrocyte/brain) (HepG2 glucose transporter) | GTR1_HUMAN  | 54101  | 100% | 3  | 3  | 3  | 0.03% | 6.71%  |
| FTC133-p16 | (P11166) Solute carrier family 2, facilitated glucose transporter member 1 (Glucose transporter type 1, erythrocyte/brain) (HepG2 glucose transporter) | GTR1_HUMAN  | 54101  | 100% | 2  | 2  | 2  | 0.02% | 4.67%  |
| FTC133-p16 | (P11166) Solute carrier family 2, facilitated glucose transporter member 1 (Glucose transporter type 1, erythrocyte/brain) (HepG2 glucose transporter) | GTR1_HUMAN  | 54101  | 100% | 2  | 2  | 3  | 0.04% | 4.88%  |
| FTC133-p16 | (P11166) Solute carrier family 2, facilitated glucose transporter member 1 (Glucose transporter type 1, erythrocyte/brain) (HepG2 glucose transporter) | GTR1_HUMAN  | 54101  | 100% | 3  | 3  | 5  | 0.05% | 6.71%  |
| FTC133-p16 | (P11279) Lysosome-associated membrane glycoprotein 1 precursor (LAMP-1) (CD107a antigen)                                                               | LAMP1_HUMAN | 44756  | 100% | 4  | 4  | 6  | 0.06% | 14.90% |
| FTC133-p16 | (P11279) Lysosome-associated membrane glycoprotein 1 precursor (LAMP-1) (CD107a antigen)                                                               | LAMP1_HUMAN | 44756  | 100% | 6  | 7  | 12 | 0.12% | 15.60% |
| FTC133-p16 | (P11279) Lysosome-associated membrane glycoprotein 1 precursor (LAMP-1) (CD107a antigen)                                                               | LAMP1_HUMAN | 44756  | 100% | 4  | 4  | 5  | 0.05% | 12.30% |
| FTC133-p16 | (P11279) Lysosome-associated membrane glycoprotein 1 precursor (LAMP-1) (CD107a antigen)                                                               | LAMP1_HUMAN | 44756  | 100% | 2  | 2  | 2  | 0.02% | 9.38%  |
| FTC133-p16 | (P11279) Lysosome-associated membrane glycoprotein 1 precursor (LAMP-1) (CD107a antigen)                                                               | LAMP1_HUMAN | 44756  | 100% | 2  | 3  | 10 | 0.09% | 6.01%  |

## Protein Identified Sequence Coverage in FTC-133

|            |                                                                                                                                                                                                                                                      |             |        |      |    |    |    |       |        |
|------------|------------------------------------------------------------------------------------------------------------------------------------------------------------------------------------------------------------------------------------------------------|-------------|--------|------|----|----|----|-------|--------|
| FTC133-p16 | (P11717) Cation-independent mannose-6-phosphate receptor precursor (CI Man-6-P receptor) (CI-MPR) (M6PR) (Insulin-like growth factor 2 receptor) (Insulin-like growth factor II receptor) (IGF-II receptor) (M6P/IGF2 receptor) (M6P/IGF2R) (300 kD) | MPRI_HUMAN  | 274256 | 100% | 2  | 2  | 2  | 0.02% | 1.00%  |
| FTC133-p16 | (P11717) Cation-independent mannose-6-phosphate receptor precursor (CI Man-6-P receptor) (CI-MPR) (M6PR) (Insulin-like growth factor 2 receptor) (Insulin-like growth factor II receptor) (IGF-II receptor) (M6P/IGF2 receptor) (M6P/IGF2R) (300 kD) | MPRI_HUMAN  | 274256 | 100% | 4  | 4  | 5  | 0.04% | 4.18%  |
| FTC133-p16 | (P12109) Collagen alpha-1(VI) chain precursor                                                                                                                                                                                                        | CO6A1_HUMAN | 108531 | 100% | 2  | 2  | 2  | 0.02% | 5.06%  |
| FTC133-p16 | (P12109) Collagen alpha-1(VI) chain precursor                                                                                                                                                                                                        | CO6A1_HUMAN | 108531 | 100% | 5  | 8  | 20 | 0.17% | 8.95%  |
| FTC133-p16 | (P12109) Collagen alpha-1(VI) chain precursor                                                                                                                                                                                                        | CO6A1_HUMAN | 108531 | 100% | 2  | 3  | 21 | 0.18% | 4.67%  |
| FTC133-p16 | (P12109) Collagen alpha-1(VI) chain precursor                                                                                                                                                                                                        | CO6A1_HUMAN | 108531 | 100% | 4  | 6  | 36 | 0.30% | 7.78%  |
| FTC133-p16 | (P12109) Collagen alpha-1(VI) chain precursor                                                                                                                                                                                                        | CO6A1_HUMAN | 108531 | 100% | 2  | 3  | 6  | 0.05% | 4.09%  |
| FTC133-p16 | (P12109) Collagen alpha-1(VI) chain precursor                                                                                                                                                                                                        | CO6A1_HUMAN | 108531 | 100% | 6  | 6  | 12 | 0.11% | 14.10% |
| FTC133-p16 | (P12109) Collagen alpha-1(VI) chain precursor                                                                                                                                                                                                        | CO6A1_HUMAN | 108531 | 100% | 12 | 16 | 28 | 0.26% | 20.60% |
| FTC133-p16 | (P12109) Collagen alpha-1(VI) chain precursor                                                                                                                                                                                                        | CO6A1_HUMAN | 108531 | 100% | 10 | 16 | 31 | 0.35% | 19.60% |
| FTC133-p16 | (P12109) Collagen alpha-1(VI) chain precursor                                                                                                                                                                                                        | CO6A1_HUMAN | 108531 | 100% | 11 | 15 | 28 | 0.33% | 24.60% |
| FTC133-p16 | (P12109) Collagen alpha-1(VI) chain precursor                                                                                                                                                                                                        | CO6A1_HUMAN | 108531 | 100% | 5  | 6  | 14 | 0.16% | 8.46%  |
| FTC133-p16 | (P12109) Collagen alpha-1(VI) chain precursor                                                                                                                                                                                                        | CO6A1_HUMAN | 108531 | 100% | 6  | 6  | 12 | 0.17% | 16.40% |
| FTC133-p16 | (P12109) Collagen alpha-1(VI) chain precursor                                                                                                                                                                                                        | CO6A1_HUMAN | 108531 | 100% | 10 | 14 | 27 | 0.25% | 16.50% |
| FTC133-p16 | (P12110) Collagen alpha-2(VI) chain precursor                                                                                                                                                                                                        | CO6A2_HUMAN | 108557 | 100% | 2  | 2  | 4  | 0.03% | 1.96%  |
| FTC133-p16 | (P12277) Creatine kinase B-type (EC 2.7.3.2) (Creatine kinase, B chain) (B-CK)                                                                                                                                                                       | KCRB_HUMAN  | 42627  | 100% | 2  | 2  | 2  | 0.02% | 9.71%  |
| FTC133-p16 | (P12277) Creatine kinase B-type (EC 2.7.3.2) (Creatine kinase, B chain) (B-CK)                                                                                                                                                                       | KCRB_HUMAN  | 42627  | 100% | 3  | 4  | 10 | 0.08% | 14.20% |
| FTC133-p16 | (P12277) Creatine kinase B-type (EC 2.7.3.2) (Creatine kinase, B chain) (B-CK)                                                                                                                                                                       | KCRB_HUMAN  | 42627  | 100% | 4  | 4  | 5  | 0.05% | 17.30% |
| FTC133-p16 | (P12277) Creatine kinase B-type (EC 2.7.3.2) (Creatine kinase, B chain) (B-CK)                                                                                                                                                                       | KCRB_HUMAN  | 42627  | 100% | 3  | 3  | 4  | 0.05% | 14.20% |
| FTC133-p16 | (P12277) Creatine kinase B-type (EC 2.7.3.2) (Creatine kinase, B chain) (B-CK)                                                                                                                                                                       | KCRB_HUMAN  | 42627  | 100% | 3  | 4  | 5  | 0.06% | 14.20% |
| FTC133-p16 | (P12277) Creatine kinase B-type (EC 2.7.3.2) (Creatine kinase, B chain) (B-CK)                                                                                                                                                                       | KCRB_HUMAN  | 42627  | 100% | 2  | 2  | 4  | 0.06% | 14.40% |
| FTC133-p16 | (P12429) Annexin A3 (Annexin III) (Lipocortin III) (Placental anticoagulant protein III) (PAP-III) (35-alpha calcimedlin) (Inositol 1,2-cyclic phosphate 2-phosphohydrolase)                                                                         | ANXA3_HUMAN | 36228  | 100% | 2  | 2  | 2  | 0.02% | 8.39%  |
| FTC133-p16 | (P12429) Annexin A3 (Annexin III) (Lipocortin III) (Placental anticoagulant protein III) (PAP-III) (35-alpha calcimedlin) (Inositol 1,2-cyclic phosphate 2-phosphohydrolase)                                                                         | ANXA3_HUMAN | 36228  | 100% | 2  | 2  | 2  | 0.02% | 7.76%  |
| FTC133-p16 | (P12814) Alpha-actinin-1 (Alpha-actinin cytoskeletal isoform) (Non-muscle alpha-actinin-1) (F-actin cross linking protein)                                                                                                                           | ACTN1_HUMAN | 103043 | 100% | 2  | 2  | 2  | 0.02% | 2.91%  |
| FTC133-p16 | (P12814) Alpha-actinin-1 (Alpha-actinin cytoskeletal isoform) (Non-muscle alpha-actinin-1) (F-actin cross linking protein)                                                                                                                           | ACTN1_HUMAN | 103043 | 100% | 3  | 3  | 4  | 0.03% | 4.48%  |
| FTC133-p16 | (P12814) Alpha-actinin-1 (Alpha-actinin cytoskeletal isoform) (Non-muscle alpha-actinin-1) (F-actin cross linking protein)                                                                                                                           | ACTN1_HUMAN | 103043 | 100% | 3  | 3  | 3  | 0.03% | 3.92%  |
| FTC133-p16 | (P12814) Alpha-actinin-1 (Alpha-actinin cytoskeletal isoform) (Non-muscle alpha-actinin-1) (F-actin cross linking protein)                                                                                                                           | ACTN1_HUMAN | 103043 | 100% | 2  | 2  | 2  | 0.02% | 2.91%  |

## Protein Identified Sequence Coverage in FTC-133

|            |                                                                                                                                                                                                                                                     |                |        |      |    |    |    |       |        |
|------------|-----------------------------------------------------------------------------------------------------------------------------------------------------------------------------------------------------------------------------------------------------|----------------|--------|------|----|----|----|-------|--------|
| FTC133-p16 | (P12814) Alpha-actinin-1 (Alpha-actinin cytoskeletal isoform) (Non-muscle alpha-actinin-1) (F-actin cross linking protein)                                                                                                                          | ACTN1_HUMAN    | 103043 | 100% | 2  | 2  | 2  | 0.02% | 2.69%  |
| FTC133-p16 | (P12814) Alpha-actinin-1 (Alpha-actinin cytoskeletal isoform) (Non-muscle alpha-actinin-1) (F-actin cross linking protein)                                                                                                                          | ACTN1_HUMAN    | 103043 | 100% | 2  | 2  | 3  | 0.04% | 3.25%  |
| FTC133-p16 | (P12814) Alpha-actinin-1 (Alpha-actinin cytoskeletal isoform) (Non-muscle alpha-actinin-1) (F-actin cross linking protein)                                                                                                                          | ACTN1_HUMAN    | 103043 | 100% | 2  | 2  | 2  | 0.02% | 2.91%  |
| FTC133-p16 | (P13010) ATP-dependent DNA helicase 2 subunit 2 (EC 3.6.1.-) (ATP-dependent DNA helicase II 80 kDa subunit) (Lupus Ku autoantigen protein p86) (Ku86) (Ku80) (86 kDa subunit of Ku antigen) (Thyroid-lupus autoantigen) (TLAA) (CTC box-binding fac | KU86_HUMAN     | 82558  | 100% | 3  | 4  | 5  | 0.04% | 9.85%  |
| FTC133-p16 | (P13010) ATP-dependent DNA helicase 2 subunit 2 (EC 3.6.1.-) (ATP-dependent DNA helicase II 80 kDa subunit) (Lupus Ku autoantigen protein p86) (Ku86) (Ku80) (86 kDa subunit of Ku antigen) (Thyroid-lupus autoantigen) (TLAA) (CTC box-binding fac | KU86_HUMAN     | 82558  | 100% | 3  | 3  | 3  | 0.03% | 10.50% |
| FTC133-p16 | (P13010) ATP-dependent DNA helicase 2 subunit 2 (EC 3.6.1.-) (ATP-dependent DNA helicase II 80 kDa subunit) (Lupus Ku autoantigen protein p86) (Ku86) (Ku80) (86 kDa subunit of Ku antigen) (Thyroid-lupus autoantigen) (TLAA) (CTC box-binding fac | KU86_HUMAN     | 82558  | 100% | 3  | 3  | 5  | 0.04% | 9.99%  |
| FTC133-p16 | (P13010) ATP-dependent DNA helicase 2 subunit 2 (EC 3.6.1.-) (ATP-dependent DNA helicase II 80 kDa subunit) (Lupus Ku autoantigen protein p86) (Ku86) (Ku80) (86 kDa subunit of Ku antigen) (Thyroid-lupus autoantigen) (TLAA) (CTC box-binding fac | KU86_HUMAN     | 82558  | 100% | 2  | 2  | 3  | 0.04% | 3.69%  |
| FTC133-p16 | (P13284) Gamma-interferon-inducible lysosomal thiol reductase precursor (Gamma-interferon-inducible protein IP-30)                                                                                                                                  | GILT_HUMAN     | 29131  | 100% | 2  | 2  | 2  | 0.02% | 24.50% |
| FTC133-p16 | (P13284) Gamma-interferon-inducible lysosomal thiol reductase precursor (Gamma-interferon-inducible protein IP-30)                                                                                                                                  | GILT_HUMAN     | 29131  | 100% | 2  | 2  | 2  | 0.02% | 24.50% |
| FTC133-p16 | (P13591) Neural cell adhesion molecule 1, 140 kDa isoform precursor (N-CAM 140) (NCAM-140) (CD56 antigen)                                                                                                                                           | NCA11_HUMAN,NC | 83753  | 100% | 2  | 3  | 3  | 0.03% | 6.31%  |
| FTC133-p16 | (P13591) Neural cell adhesion molecule 1, 140 kDa isoform precursor (N-CAM 140) (NCAM-140) (CD56 antigen)                                                                                                                                           | NCA11_HUMAN,NC | 93343  | 100% | 2  | 2  | 3  | 0.03% | 4.01%  |
| FTC133-p16 | (P13639) Elongation factor 2 (EF-2)                                                                                                                                                                                                                 | EF2_HUMAN      | 95191  | 100% | 3  | 3  | 4  | 0.03% | 5.60%  |
| FTC133-p16 | (P13667) Protein disulfide-isomerase A4 precursor (EC 5.3.4.1) (Protein ERp72) (ERp72)                                                                                                                                                              | PDIA4_HUMAN    | 72916  | 100% | 14 | 16 | 37 | 0.32% | 29.90% |
| FTC133-p16 | (P13667) Protein disulfide-isomerase A4 precursor (EC 5.3.4.1) (Protein ERp72) (ERp72)                                                                                                                                                              | PDIA4_HUMAN    | 72916  | 100% | 5  | 7  | 15 | 0.13% | 12.40% |
| FTC133-p16 | (P13667) Protein disulfide-isomerase A4 precursor (EC 5.3.4.1) (Protein ERp72) (ERp72)                                                                                                                                                              | PDIA4_HUMAN    | 72916  | 100% | 3  | 5  | 7  | 0.06% | 10.70% |
| FTC133-p16 | (P13667) Protein disulfide-isomerase A4 precursor (EC 5.3.4.1) (Protein ERp72) (ERp72)                                                                                                                                                              | PDIA4_HUMAN    | 72916  | 100% | 2  | 3  | 3  | 0.03% | 5.58%  |
| FTC133-p16 | (P13667) Protein disulfide-isomerase A4 precursor (EC 5.3.4.1) (Protein ERp72) (ERp72)                                                                                                                                                              | PDIA4_HUMAN    | 72916  | 100% | 21 | 26 | 50 | 0.46% | 38.00% |

Protein Identified Sequence Coverage in FTC-133

|            |                                                                                                                                                                                                                                                      |             |       |      |    |    |    |       |        |
|------------|------------------------------------------------------------------------------------------------------------------------------------------------------------------------------------------------------------------------------------------------------|-------------|-------|------|----|----|----|-------|--------|
| FTC133-p16 | (P13667) Protein disulfide-isomerase A4 precursor (EC 5.3.4.1) (Protein ERp-72) (ERp72)                                                                                                                                                              | PDIA4_HUMAN | 72916 | 100% | 15 | 18 | 45 | 0.50% | 30.70% |
| FTC133-p16 | (P13667) Protein disulfide-isomerase A4 precursor (EC 5.3.4.1) (Protein ERp-72) (ERp72)                                                                                                                                                              | PDIA4_HUMAN | 72916 | 100% | 14 | 18 | 30 | 0.35% | 28.50% |
| FTC133-p16 | (P13667) Protein disulfide-isomerase A4 precursor (EC 5.3.4.1) (Protein ERp-72) (ERp72)                                                                                                                                                              | PDIA4_HUMAN | 72916 | 100% | 9  | 11 | 24 | 0.28% | 17.40% |
| FTC133-p16 | (P13667) Protein disulfide-isomerase A4 precursor (EC 5.3.4.1) (Protein ERp-72) (ERp72)                                                                                                                                                              | PDIA4_HUMAN | 72916 | 100% | 8  | 8  | 15 | 0.22% | 21.20% |
| FTC133-p16 | (P13667) Protein disulfide-isomerase A4 precursor (EC 5.3.4.1) (Protein ERp-72) (ERp72)                                                                                                                                                              | PDIA4_HUMAN | 72916 | 100% | 20 | 25 | 70 | 0.64% | 37.50% |
| FTC133-p16 | (P13674) Prolyl 4-hydroxylase alpha-1 subunit precursor (EC 1.14.11.2) (4-PH alpha-1) (Procollagen-proline,2-oxoglutarate-4-dioxygenase alpha-1 subunit)                                                                                             | P4HA1_HUMAN | 61034 | 100% | 2  | 2  | 2  | 0.02% | 10.10% |
| FTC133-p16 | (P13674) Prolyl 4-hydroxylase alpha-1 subunit precursor (EC 1.14.11.2) (4-PH alpha-1) (Procollagen-proline,2-oxoglutarate-4-dioxygenase alpha-1 subunit)                                                                                             | P4HA1_HUMAN | 61034 | 100% | 4  | 4  | 5  | 0.05% | 12.50% |
| FTC133-p16 | (P13804) Electron transfer flavoprotein alpha-subunit, mitochondrial precursor (Alpha-ETF)                                                                                                                                                           | ETFA_HUMAN  | 35062 | 100% | 2  | 2  | 4  | 0.03% | 10.80% |
| FTC133-p16 | (P13804) Electron transfer flavoprotein alpha-subunit, mitochondrial precursor (Alpha-ETF)                                                                                                                                                           | ETFA_HUMAN  | 35062 | 100% | 2  | 2  | 2  | 0.02% | 9.91%  |
| FTC133-p16 | (P13987) CD59 glycoprotein precursor (Membrane attack complex inhibition factor) (MACIF) (MAC-inhibitory protein) (MAC-IP) (Protectin) (MEM43 antigen) (Membrane inhibitor of reactive lysis) (MIRL) (20 kDa homologous restriction factor) (HRF-20) | CD59_HUMAN  | 14159 | 100% | 4  | 5  | 23 | 0.21% | 25.00% |
| FTC133-p16 | (P13987) CD59 glycoprotein precursor (Membrane attack complex inhibition factor) (MACIF) (MAC-inhibitory protein) (MAC-IP) (Protectin) (MEM43 antigen) (Membrane inhibitor of reactive lysis) (MIRL) (20 kDa homologous restriction factor) (HRF-20) | CD59_HUMAN  | 14159 | 100% | 3  | 3  | 5  | 0.06% | 25.00% |
| FTC133-p16 | (P13987) CD59 glycoprotein precursor (Membrane attack complex inhibition factor) (MACIF) (MAC-inhibitory protein) (MAC-IP) (Protectin) (MEM43 antigen) (Membrane inhibitor of reactive lysis) (MIRL) (20 kDa homologous restriction factor) (HRF-20) | CD59_HUMAN  | 14159 | 100% | 2  | 4  | 7  | 0.08% | 18.80% |
| FTC133-p16 | (P13987) CD59 glycoprotein precursor (Membrane attack complex inhibition factor) (MACIF) (MAC-inhibitory protein) (MAC-IP) (Protectin) (MEM43 antigen) (Membrane inhibitor of reactive lysis) (MIRL) (20 kDa homologous restriction factor) (HRF-20) | CD59_HUMAN  | 14159 | 100% | 3  | 4  | 5  | 0.05% | 25.00% |
| FTC133-p16 | (P14314) Glucosidase 2 beta subunit precursor (Glucosidase II beta subunit) (Protein kinase C substrate, 60.1 kDa protein, heavy chain) (PKCSH) (80K-H protein)                                                                                      | GLU2B_HUMAN | 59279 | 100% | 4  | 4  | 7  | 0.07% | 10.20% |
| FTC133-p16 | (P14314) Glucosidase 2 beta subunit precursor (Glucosidase II beta subunit) (Protein kinase C substrate, 60.1 kDa protein, heavy chain) (PKCSH) (80K-H protein)                                                                                      | GLU2B_HUMAN | 59279 | 100% | 7  | 8  | 21 | 0.18% | 22.80% |

## Protein Identified Sequence Coverage in FTC-133

|            |                                                                                                                                                                 |             |       |      |    |    |    |       |        |
|------------|-----------------------------------------------------------------------------------------------------------------------------------------------------------------|-------------|-------|------|----|----|----|-------|--------|
| FTC133-p16 | (P14314) Glucosidase 2 beta subunit precursor (Glucosidase II beta subunit) (Protein kinase C substrate, 60.1 kDa protein, heavy chain) (PKCSH) (80K-H protein) | GLU2B_HUMAN | 59279 | 100% | 2  | 3  | 7  | 0.06% | 12.10% |
| FTC133-p16 | (P14314) Glucosidase 2 beta subunit precursor (Glucosidase II beta subunit) (Protein kinase C substrate, 60.1 kDa protein, heavy chain) (PKCSH) (80K-H protein) | GLU2B_HUMAN | 59279 | 100% | 3  | 3  | 3  | 0.03% | 9.49%  |
| FTC133-p16 | (P14314) Glucosidase 2 beta subunit precursor (Glucosidase II beta subunit) (Protein kinase C substrate, 60.1 kDa protein, heavy chain) (PKCSH) (80K-H protein) | GLU2B_HUMAN | 59279 | 100% | 14 | 17 | 31 | 0.28% | 42.10% |
| FTC133-p16 | (P14314) Glucosidase 2 beta subunit precursor (Glucosidase II beta subunit) (Protein kinase C substrate, 60.1 kDa protein, heavy chain) (PKCSH) (80K-H protein) | GLU2B_HUMAN | 59279 | 100% | 8  | 8  | 18 | 0.20% | 27.70% |
| FTC133-p16 | (P14314) Glucosidase 2 beta subunit precursor (Glucosidase II beta subunit) (Protein kinase C substrate, 60.1 kDa protein, heavy chain) (PKCSH) (80K-H protein) | GLU2B_HUMAN | 59279 | 100% | 8  | 9  | 10 | 0.12% | 26.40% |
| FTC133-p16 | (P14314) Glucosidase 2 beta subunit precursor (Glucosidase II beta subunit) (Protein kinase C substrate, 60.1 kDa protein, heavy chain) (PKCSH) (80K-H protein) | GLU2B_HUMAN | 59279 | 100% | 5  | 5  | 8  | 0.09% | 11.80% |
| FTC133-p16 | (P14314) Glucosidase 2 beta subunit precursor (Glucosidase II beta subunit) (Protein kinase C substrate, 60.1 kDa protein, heavy chain) (PKCSH) (80K-H protein) | GLU2B_HUMAN | 59279 | 100% | 4  | 4  | 8  | 0.12% | 20.90% |
| FTC133-p16 | (P14314) Glucosidase 2 beta subunit precursor (Glucosidase II beta subunit) (Protein kinase C substrate, 60.1 kDa protein, heavy chain) (PKCSH) (80K-H protein) | GLU2B_HUMAN | 59279 | 100% | 10 | 11 | 25 | 0.23% | 30.40% |
| FTC133-p16 | (P14618) Pyruvate kinase isozymes M1/M2 (EC 2.7.1.40) (Pyruvate kinase muscle isozyme) (Cytosolic thyroid hormone-binding protein) (CTHBP) (THBP1)              | KPYM_HUMAN  | 57788 | 100% | 4  | 4  | 4  | 0.03% | 14.30% |
| FTC133-p16 | (P14618) Pyruvate kinase isozymes M1/M2 (EC 2.7.1.40) (Pyruvate kinase muscle isozyme) (Cytosolic thyroid hormone-binding protein) (CTHBP) (THBP1)              | KPYM_HUMAN  | 57788 | 100% | 3  | 5  | 14 | 0.12% | 9.62%  |
| FTC133-p16 | (P14618) Pyruvate kinase isozymes M1/M2 (EC 2.7.1.40) (Pyruvate kinase muscle isozyme) (Cytosolic thyroid hormone-binding protein) (CTHBP) (THBP1)              | KPYM_HUMAN  | 57788 | 100% | 2  | 3  | 5  | 0.04% | 7.36%  |
| FTC133-p16 | (P14618) Pyruvate kinase isozymes M1/M2 (EC 2.7.1.40) (Pyruvate kinase muscle isozyme) (Cytosolic thyroid hormone-binding protein) (CTHBP) (THBP1)              | KPYM_HUMAN  | 57788 | 100% | 2  | 3  | 5  | 0.04% | 6.04%  |
| FTC133-p16 | (P14618) Pyruvate kinase isozymes M1/M2 (EC 2.7.1.40) (Pyruvate kinase muscle isozyme) (Cytosolic thyroid hormone-binding protein) (CTHBP) (THBP1)              | KPYM_HUMAN  | 57788 | 100% | 2  | 2  | 3  | 0.03% | 4.72%  |
| FTC133-p16 | (P14618) Pyruvate kinase isozymes M1/M2 (EC 2.7.1.40) (Pyruvate kinase muscle isozyme) (Cytosolic thyroid hormone-binding protein) (CTHBP) (THBP1)              | KPYM_HUMAN  | 57788 | 100% | 4  | 4  | 4  | 0.04% | 14.90% |



## Protein Identified Sequence Coverage in FTC-133

|            |                                                                                                                                                                |            |       |      |    |    |    |       |        |
|------------|----------------------------------------------------------------------------------------------------------------------------------------------------------------|------------|-------|------|----|----|----|-------|--------|
| FTC133-p16 | (P14618) Pyruvate kinase isozymes M1/M2 (EC 2.7.1.40) (Pyruvate kinase muscle isozyme) (Cytosolic thyroid hormone-binding protein) (CTHBP) (THBP1)             | KPYM_HUMAN | 57788 | 100% | 4  | 4  | 4  | 0.05% | 15.10% |
| FTC133-p16 | (P14618) Pyruvate kinase isozymes M1/M2 (EC 2.7.1.40) (Pyruvate kinase muscle isozyme) (Cytosolic thyroid hormone-binding protein) (CTHBP) (THBP1)             | KPYM_HUMAN | 57788 | 100% | 2  | 2  | 2  | 0.02% | 7.36%  |
| FTC133-p16 | (P14618) Pyruvate kinase isozymes M1/M2 (EC 2.7.1.40) (Pyruvate kinase muscle isozyme) (Cytosolic thyroid hormone-binding protein) (CTHBP) (THBP1)             | KPYM_HUMAN | 57788 | 100% | 2  | 2  | 3  | 0.04% | 8.49%  |
| FTC133-p16 | (P14618) Pyruvate kinase isozymes M1/M2 (EC 2.7.1.40) (Pyruvate kinase muscle isozyme) (Cytosolic thyroid hormone-binding protein) (CTHBP) (THBP1)             | KPYM_HUMAN | 57788 | 100% | 4  | 4  | 4  | 0.04% | 12.80% |
| FTC133-p16 | (P14625) Endoplasmin precursor (Heat shock protein 90 kDa beta member 1) (94 kDa glucose-regulated protein) (GRP94) (gp96 homolog) (Tumor rejection antigen 1) | ENPL_HUMAN | 92454 | 100% | 6  | 6  | 7  | 0.06% | 11.70% |
| FTC133-p16 | (P14625) Endoplasmin precursor (Heat shock protein 90 kDa beta member 1) (94 kDa glucose-regulated protein) (GRP94) (gp96 homolog) (Tumor rejection antigen 1) | ENPL_HUMAN | 92454 | 100% | 4  | 5  | 14 | 0.12% | 7.60%  |
| FTC133-p16 | (P14625) Endoplasmin precursor (Heat shock protein 90 kDa beta member 1) (94 kDa glucose-regulated protein) (GRP94) (gp96 homolog) (Tumor rejection antigen 1) | ENPL_HUMAN | 92454 | 100% | 3  | 3  | 10 | 0.09% | 9.34%  |
| FTC133-p16 | (P14625) Endoplasmin precursor (Heat shock protein 90 kDa beta member 1) (94 kDa glucose-regulated protein) (GRP94) (gp96 homolog) (Tumor rejection antigen 1) | ENPL_HUMAN | 92454 | 100% | 2  | 3  | 3  | 0.03% | 4.86%  |
| FTC133-p16 | (P14625) Endoplasmin precursor (Heat shock protein 90 kDa beta member 1) (94 kDa glucose-regulated protein) (GRP94) (gp96 homolog) (Tumor rejection antigen 1) | ENPL_HUMAN | 92454 | 100% | 2  | 2  | 2  | 0.02% | 5.48%  |
| FTC133-p16 | (P14625) Endoplasmin precursor (Heat shock protein 90 kDa beta member 1) (94 kDa glucose-regulated protein) (GRP94) (gp96 homolog) (Tumor rejection antigen 1) | ENPL_HUMAN | 92454 | 100% | 9  | 10 | 15 | 0.14% | 17.40% |
| FTC133-p16 | (P14625) Endoplasmin precursor (Heat shock protein 90 kDa beta member 1) (94 kDa glucose-regulated protein) (GRP94) (gp96 homolog) (Tumor rejection antigen 1) | ENPL_HUMAN | 92454 | 100% | 10 | 10 | 14 | 0.16% | 19.90% |
| FTC133-p16 | (P14625) Endoplasmin precursor (Heat shock protein 90 kDa beta member 1) (94 kDa glucose-regulated protein) (GRP94) (gp96 homolog) (Tumor rejection antigen 1) | ENPL_HUMAN | 92454 | 100% | 7  | 8  | 9  | 0.11% | 15.10% |
| FTC133-p16 | (P14625) Endoplasmin precursor (Heat shock protein 90 kDa beta member 1) (94 kDa glucose-regulated protein) (GRP94) (gp96 homolog) (Tumor rejection antigen 1) | ENPL_HUMAN | 92454 | 100% | 4  | 4  | 7  | 0.08% | 8.72%  |
| FTC133-p16 | (P14625) Endoplasmin precursor (Heat shock protein 90 kDa beta member 1) (94 kDa glucose-regulated protein) (GRP94) (gp96 homolog) (Tumor rejection antigen 1) | ENPL_HUMAN | 92454 | 100% | 3  | 3  | 5  | 0.07% | 7.72%  |

## Protein Identified Sequence Coverage in FTC-133

|            |                                                                                                                                                                                                              |            |       |      |   |    |    |       |        |
|------------|--------------------------------------------------------------------------------------------------------------------------------------------------------------------------------------------------------------|------------|-------|------|---|----|----|-------|--------|
| FTC133-p16 | (P14625) Endoplasmin precursor (Heat shock protein 90 kDa beta member 1) (94 kDa glucose-regulated protein) (GRP94) (gp96 homolog) (Tumor rejection antigen 1)                                               | ENPL_HUMAN | 92454 | 100% | 9 | 10 | 31 | 0.29% | 15.10% |
| FTC133-p16 | (P15289) Arylsulfatase A precursor (EC 3.1.6.8) (ASA) (Cerebrosidase-sulfatase) [Contains: Arylsulfatase A component B; Arylsulfatase A component C]                                                         | ARSA_HUMAN | 53571 | 100% | 2 | 2  | 2  | 0.02% | 8.09%  |
| FTC133-p16 | (P15289) Arylsulfatase A precursor (EC 3.1.6.8) (ASA) (Cerebrosidase-sulfatase) [Contains: Arylsulfatase A component B; Arylsulfatase A component C]                                                         | ARSA_HUMAN | 53571 | 100% | 4 | 5  | 13 | 0.11% | 13.80% |
| FTC133-p16 | (P15289) Arylsulfatase A precursor (EC 3.1.6.8) (ASA) (Cerebrosidase-sulfatase) [Contains: Arylsulfatase A component B; Arylsulfatase A component C]                                                         | ARSA_HUMAN | 53571 | 100% | 4 | 4  | 7  | 0.06% | 13.80% |
| FTC133-p16 | (P15289) Arylsulfatase A precursor (EC 3.1.6.8) (ASA) (Cerebrosidase-sulfatase) [Contains: Arylsulfatase A component B; Arylsulfatase A component C]                                                         | ARSA_HUMAN | 53571 | 100% | 2 | 2  | 4  | 0.04% | 8.09%  |
| FTC133-p16 | (P15289) Arylsulfatase A precursor (EC 3.1.6.8) (ASA) (Cerebrosidase-sulfatase) [Contains: Arylsulfatase A component B; Arylsulfatase A component C]                                                         | ARSA_HUMAN | 53571 | 100% | 3 | 3  | 4  | 0.05% | 10.70% |
| FTC133-p16 | (P15289) Arylsulfatase A precursor (EC 3.1.6.8) (ASA) (Cerebrosidase-sulfatase) [Contains: Arylsulfatase A component B; Arylsulfatase A component C]                                                         | ARSA_HUMAN | 53571 | 100% | 2 | 2  | 3  | 0.04% | 5.92%  |
| FTC133-p16 | (P15311) Ezrin (p81) (Cytovillin) (Villin-2)                                                                                                                                                                 | EZRI_HUMAN | 69251 | 100% | 3 | 4  | 5  | 0.04% | 10.10% |
| FTC133-p16 | (P15311) Ezrin (p81) (Cytovillin) (Villin-2)                                                                                                                                                                 | EZRI_HUMAN | 69251 | 100% | 4 | 6  | 22 | 0.19% | 16.20% |
| FTC133-p16 | (P15311) Ezrin (p81) (Cytovillin) (Villin-2)                                                                                                                                                                 | EZRI_HUMAN | 69251 | 100% | 5 | 6  | 10 | 0.09% | 17.80% |
| FTC133-p16 | (P15311) Ezrin (p81) (Cytovillin) (Villin-2)                                                                                                                                                                 | EZRI_HUMAN | 69251 | 100% | 4 | 5  | 6  | 0.07% | 18.50% |
| FTC133-p16 | (P15311) Ezrin (p81) (Cytovillin) (Villin-2)                                                                                                                                                                 | EZRI_HUMAN | 69251 | 100% | 3 | 5  | 8  | 0.09% | 16.40% |
| FTC133-p16 | (P15311) Ezrin (p81) (Cytovillin) (Villin-2)                                                                                                                                                                 | EZRI_HUMAN | 69251 | 100% | 4 | 4  | 7  | 0.08% | 15.20% |
| FTC133-p16 | (P15311) Ezrin (p81) (Cytovillin) (Villin-2)                                                                                                                                                                 | EZRI_HUMAN | 69251 | 100% | 3 | 3  | 4  | 0.06% | 13.80% |
| FTC133-p16 | (P15311) Ezrin (p81) (Cytovillin) (Villin-2)                                                                                                                                                                 | EZRI_HUMAN | 69251 | 100% | 6 | 7  | 14 | 0.13% | 24.30% |
| FTC133-p16 | (P15531) Nucleoside diphosphate kinase A (EC 2.7.4.6) (NDK A) (NDP kinase A) (Tumor metastatic process-associated protein) (Metastasis inhibition factor nm23) (nm23-H1) (Granzyme A-activated DNase) (GAAD) | NDKA_HUMAN | 17131 | 100% | 2 | 2  | 2  | 0.02% | 27.00% |
| FTC133-p16 | (P15586) N-acetylglucosamine-6-sulfatase precursor (EC 3.1.6.14) (G6S) (Glucosamine-6-sulfatase)                                                                                                             | GL6S_HUMAN | 62066 | 100% | 5 | 6  | 9  | 0.09% | 11.10% |
| FTC133-p16 | (P15586) N-acetylglucosamine-6-sulfatase precursor (EC 3.1.6.14) (G6S) (Glucosamine-6-sulfatase)                                                                                                             | GL6S_HUMAN | 62066 | 100% | 2 | 2  | 2  | 0.02% | 3.80%  |
| FTC133-p16 | (P15586) N-acetylglucosamine-6-sulfatase precursor (EC 3.1.6.14) (G6S) (Glucosamine-6-sulfatase)                                                                                                             | GL6S_HUMAN | 62066 | 100% | 2 | 2  | 3  | 0.03% | 9.96%  |
| FTC133-p16 | (P15586) N-acetylglucosamine-6-sulfatase precursor (EC 3.1.6.14) (G6S) (Glucosamine-6-sulfatase)                                                                                                             | GL6S_HUMAN | 62066 | 100% | 2 | 2  | 4  | 0.03% | 3.99%  |
| FTC133-p16 | (P15586) N-acetylglucosamine-6-sulfatase precursor (EC 3.1.6.14) (G6S) (Glucosamine-6-sulfatase)                                                                                                             | GL6S_HUMAN | 62066 | 100% | 5 | 5  | 8  | 0.07% | 18.50% |

## Protein Identified Sequence Coverage in FTC-133

|            |                                                                                                                                                                                                                                                     |            |       |      |   |   |    |       |        |
|------------|-----------------------------------------------------------------------------------------------------------------------------------------------------------------------------------------------------------------------------------------------------|------------|-------|------|---|---|----|-------|--------|
| FTC133-p16 | (P15586) N-acetylglucosamine-6-sulfatase precursor (EC 3.1.6.14) (G6S) (Glucosamine-6-sulfatase)                                                                                                                                                    | GL6S_HUMAN | 62066 | 100% | 4 | 4 | 5  | 0.06% | 11.20% |
| FTC133-p16 | (P15586) N-acetylglucosamine-6-sulfatase precursor (EC 3.1.6.14) (G6S) (Glucosamine-6-sulfatase)                                                                                                                                                    | GL6S_HUMAN | 62066 | 100% | 5 | 5 | 6  | 0.07% | 14.10% |
| FTC133-p16 | (P15586) N-acetylglucosamine-6-sulfatase precursor (EC 3.1.6.14) (G6S) (Glucosamine-6-sulfatase)                                                                                                                                                    | GL6S_HUMAN | 62066 | 100% | 3 | 3 | 5  | 0.06% | 6.70%  |
| FTC133-p16 | (P15586) N-acetylglucosamine-6-sulfatase precursor (EC 3.1.6.14) (G6S) (Glucosamine-6-sulfatase)                                                                                                                                                    | GL6S_HUMAN | 62066 | 100% | 5 | 5 | 6  | 0.06% | 10.70% |
| FTC133-p16 | (P16070) CD44 antigen precursor (Phagocytic glycoprotein I) (PGP-1) (HUTCH-I) (Extracellular matrix receptor-III) (ECMR-III) (GP90 lymphocyte homing/adhesion receptor) (Hermes antigen) (Hyaluronate receptor) (Heparan sulfate proteoglycan) (Epi | CD44_HUMAN | 81535 | 100% | 2 | 2 | 5  | 0.05% | 3.50%  |
| FTC133-p16 | (P16070) CD44 antigen precursor (Phagocytic glycoprotein I) (PGP-1) (HUTCH-I) (Extracellular matrix receptor-III) (ECMR-III) (GP90 lymphocyte homing/adhesion receptor) (Hermes antigen) (Hyaluronate receptor) (Heparan sulfate proteoglycan) (Epi | CD44_HUMAN | 81535 | 100% | 2 | 3 | 17 | 0.17% | 3.50%  |
| FTC133-p16 | (P16070) CD44 antigen precursor (Phagocytic glycoprotein I) (PGP-1) (HUTCH-I) (Extracellular matrix receptor-III) (ECMR-III) (GP90 lymphocyte homing/adhesion receptor) (Hermes antigen) (Hyaluronate receptor) (Heparan sulfate proteoglycan) (Epi | CD44_HUMAN | 81535 | 100% | 4 | 4 | 15 | 0.16% | 6.60%  |
| FTC133-p16 | (P16070) CD44 antigen precursor (Phagocytic glycoprotein I) (PGP-1) (HUTCH-I) (Extracellular matrix receptor-III) (ECMR-III) (GP90 lymphocyte homing/adhesion receptor) (Hermes antigen) (Hyaluronate receptor) (Heparan sulfate proteoglycan) (Epi | CD44_HUMAN | 81535 | 100% | 4 | 4 | 15 | 0.13% | 6.06%  |
| FTC133-p16 | (P16070) CD44 antigen precursor (Phagocytic glycoprotein I) (PGP-1) (HUTCH-I) (Extracellular matrix receptor-III) (ECMR-III) (GP90 lymphocyte homing/adhesion receptor) (Hermes antigen) (Hyaluronate receptor) (Heparan sulfate proteoglycan) (Epi | CD44_HUMAN | 81535 | 100% | 5 | 6 | 26 | 0.24% | 8.09%  |
| FTC133-p16 | (P16070) CD44 antigen precursor (Phagocytic glycoprotein I) (PGP-1) (HUTCH-I) (Extracellular matrix receptor-III) (ECMR-III) (GP90 lymphocyte homing/adhesion receptor) (Hermes antigen) (Hyaluronate receptor) (Heparan sulfate proteoglycan) (Epi | CD44_HUMAN | 81535 | 100% | 6 | 7 | 20 | 0.22% | 9.43%  |
| FTC133-p16 | (P16070) CD44 antigen precursor (Phagocytic glycoprotein I) (PGP-1) (HUTCH-I) (Extracellular matrix receptor-III) (ECMR-III) (GP90 lymphocyte homing/adhesion receptor) (Hermes antigen) (Hyaluronate receptor) (Heparan sulfate proteoglycan) (Epi | CD44_HUMAN | 81535 | 100% | 5 | 6 | 11 | 0.13% | 8.09%  |

|            |                                                                                                                                                                                                                                                     |            |       |      |   |   |    |       |        |
|------------|-----------------------------------------------------------------------------------------------------------------------------------------------------------------------------------------------------------------------------------------------------|------------|-------|------|---|---|----|-------|--------|
| FTC133-p16 | (P16070) CD44 antigen precursor (Phagocytic glycoprotein I) (PGP-1) (HUTCH-I) (Extracellular matrix receptor-III) (ECMR-III) (GP90 lymphocyte homing/adhesion receptor) (Hermes antigen) (Hyaluronate receptor) (Heparan sulfate proteoglycan) (Epi | CD44_HUMAN | 81535 | 100% | 5 | 5 | 14 | 0.16% | 8.09%  |
| FTC133-p16 | (P16070) CD44 antigen precursor (Phagocytic glycoprotein I) (PGP-1) (HUTCH-I) (Extracellular matrix receptor-III) (ECMR-III) (GP90 lymphocyte homing/adhesion receptor) (Hermes antigen) (Hyaluronate receptor) (Heparan sulfate proteoglycan) (Epi | CD44_HUMAN | 81535 | 100% | 5 | 6 | 18 | 0.17% | 8.09%  |
| FTC133-p16 | (P16278) Beta-galactosidase precursor (EC 3.2.1.23) (Lactase) (Acid beta-galactosidase)                                                                                                                                                             | BGAL_HUMAN | 76076 | 100% | 4 | 4 | 4  | 0.04% | 7.68%  |
| FTC133-p16 | (P16278) Beta-galactosidase precursor (EC 3.2.1.23) (Lactase) (Acid beta-galactosidase)                                                                                                                                                             | BGAL_HUMAN | 76076 | 100% | 2 | 2 | 2  | 0.02% | 3.84%  |
| FTC133-p16 | (P16278) Beta-galactosidase precursor (EC 3.2.1.23) (Lactase) (Acid beta-galactosidase)                                                                                                                                                             | BGAL_HUMAN | 76076 | 100% | 3 | 3 | 4  | 0.04% | 5.32%  |
| FTC133-p16 | (P16278) Beta-galactosidase precursor (EC 3.2.1.23) (Lactase) (Acid beta-galactosidase)                                                                                                                                                             | BGAL_HUMAN | 76076 | 100% | 3 | 3 | 3  | 0.03% | 5.61%  |
| FTC133-p16 | (P16278) Beta-galactosidase precursor (EC 3.2.1.23) (Lactase) (Acid beta-galactosidase)                                                                                                                                                             | BGAL_HUMAN | 76076 | 100% | 3 | 3 | 3  | 0.04% | 5.76%  |
| FTC133-p16 | (P16278) Beta-galactosidase precursor (EC 3.2.1.23) (Lactase) (Acid beta-galactosidase)                                                                                                                                                             | BGAL_HUMAN | 76076 | 100% | 2 | 2 | 3  | 0.04% | 3.69%  |
| FTC133-p16 | (P16278) Beta-galactosidase precursor (EC 3.2.1.23) (Lactase) (Acid beta-galactosidase)                                                                                                                                                             | BGAL_HUMAN | 76076 | 100% | 5 | 5 | 5  | 0.05% | 9.75%  |
| FTC133-p16 | (P17174) Aspartate aminotransferase, cytoplasmic (EC 2.6.1.1) (Transaminase A) (Glutamate oxaloacetate transaminase 1)                                                                                                                              | AATC_HUMAN | 46099 | 100% | 4 | 6 | 9  | 0.08% | 14.80% |
| FTC133-p16 | (P17174) Aspartate aminotransferase, cytoplasmic (EC 2.6.1.1) (Transaminase A) (Glutamate oxaloacetate transaminase 1)                                                                                                                              | AATC_HUMAN | 46099 | 100% | 2 | 4 | 10 | 0.09% | 9.47%  |
| FTC133-p16 | (P17174) Aspartate aminotransferase, cytoplasmic (EC 2.6.1.1) (Transaminase A) (Glutamate oxaloacetate transaminase 1)                                                                                                                              | AATC_HUMAN | 46099 | 100% | 2 | 3 | 10 | 0.09% | 9.95%  |
| FTC133-p16 | (P17174) Aspartate aminotransferase, cytoplasmic (EC 2.6.1.1) (Transaminase A) (Glutamate oxaloacetate transaminase 1)                                                                                                                              | AATC_HUMAN | 46099 | 100% | 2 | 2 | 5  | 0.04% | 10.70% |
| FTC133-p16 | (P17174) Aspartate aminotransferase, cytoplasmic (EC 2.6.1.1) (Transaminase A) (Glutamate oxaloacetate transaminase 1)                                                                                                                              | AATC_HUMAN | 46099 | 100% | 5 | 7 | 12 | 0.11% | 23.80% |
| FTC133-p16 | (P17174) Aspartate aminotransferase, cytoplasmic (EC 2.6.1.1) (Transaminase A) (Glutamate oxaloacetate transaminase 1)                                                                                                                              | AATC_HUMAN | 46099 | 100% | 3 | 4 | 7  | 0.08% | 13.10% |
| FTC133-p16 | (P17174) Aspartate aminotransferase, cytoplasmic (EC 2.6.1.1) (Transaminase A) (Glutamate oxaloacetate transaminase 1)                                                                                                                              | AATC_HUMAN | 46099 | 100% | 6 | 7 | 9  | 0.11% | 27.40% |
| FTC133-p16 | (P17174) Aspartate aminotransferase, cytoplasmic (EC 2.6.1.1) (Transaminase A) (Glutamate oxaloacetate transaminase 1)                                                                                                                              | AATC_HUMAN | 46099 | 100% | 2 | 2 | 3  | 0.04% | 8.50%  |
| FTC133-p16 | (P17174) Aspartate aminotransferase, cytoplasmic (EC 2.6.1.1) (Transaminase A) (Glutamate oxaloacetate transaminase 1)                                                                                                                              | AATC_HUMAN | 46099 | 100% | 4 | 4 | 6  | 0.09% | 19.40% |
| FTC133-p16 | (P17174) Aspartate aminotransferase, cytoplasmic (EC 2.6.1.1) (Transaminase A) (Glutamate oxaloacetate transaminase 1)                                                                                                                              | AATC_HUMAN | 46099 | 100% | 7 | 8 | 17 | 0.16% | 28.20% |
| FTC133-p16 | (P17813) Endoglin precursor (CD105 antigen)                                                                                                                                                                                                         | EGLN_HUMAN | 70561 | 100% | 2 | 3 | 3  | 0.03% | 5.17%  |

Protein Identified Sequence Coverage in FTC-133

|            |                                                                                                                                                                                             |             |        |      |   |   |   |       |        |
|------------|---------------------------------------------------------------------------------------------------------------------------------------------------------------------------------------------|-------------|--------|------|---|---|---|-------|--------|
| FTC133-p16 | (P17813) Endoglin precursor (CD105 antigen)                                                                                                                                                 | EGLN_HUMAN  | 70561  | 100% | 2 | 2 | 2 | 0.02% | 6.84%  |
| FTC133-p16 | (P17813) Endoglin precursor (CD105 antigen)                                                                                                                                                 | EGLN_HUMAN  | 70561  | 100% | 2 | 2 | 2 | 0.02% | 7.60%  |
| FTC133-p16 | (P17813) Endoglin precursor (CD105 antigen)                                                                                                                                                 | EGLN_HUMAN  | 70561  | 100% | 2 | 2 | 3 | 0.04% | 4.71%  |
| FTC133-p16 | (P17813) Endoglin precursor (CD105 antigen)                                                                                                                                                 | EGLN_HUMAN  | 70561  | 100% | 2 | 2 | 2 | 0.02% | 7.60%  |
| FTC133-p16 | (P17900) Ganglioside GM2 activator precursor (GM2-AP) (Cerebroside sulfate activator protein) (Shingolipid activator protein 3) (SAP-3) [Contains: Ganglioside GM2 activator isoform short] | SAP3_HUMAN  | 20805  | 100% | 3 | 3 | 4 | 0.04% | 31.60% |
| FTC133-p16 | (P17900) Ganglioside GM2 activator precursor (GM2-AP) (Cerebroside sulfate activator protein) (Shingolipid activator protein 3) (SAP-3) [Contains: Ganglioside GM2 activator isoform short] | SAP3_HUMAN  | 20805  | 100% | 3 | 3 | 3 | 0.03% | 33.70% |
| FTC133-p16 | (P17987) T-complex protein 1 subunit alpha (TCP-1-alpha) (CCT-alpha)                                                                                                                        | TCPA_HUMAN  | 60327  | 100% | 3 | 3 | 3 | 0.03% | 12.90% |
| FTC133-p16 | (P18084) Integrin beta-5 precursor                                                                                                                                                          | ITB5_HUMAN  | 88037  | 100% | 2 | 2 | 5 | 0.04% | 3.88%  |
| FTC133-p16 | (P18206) Vinculin (Metavinculin)                                                                                                                                                            | VINC_HUMAN  | 123652 | 100% | 2 | 2 | 3 | 0.04% | 3.71%  |
| FTC133-p16 | (P18583) SON protein (SON3) (Negative regulatory element-binding protein) (NRE-binding protein) (DBP-5) (Bax antagonist selected in saccharomyces 1) (BASS1)                                | SON_HUMAN   | 263828 | 100% | 3 | 3 | 4 | 0.03% | 2.27%  |
| FTC133-p16 | (P18583) SON protein (SON3) (Negative regulatory element-binding protein) (NRE-binding protein) (DBP-5) (Bax antagonist selected in saccharomyces 1) (BASS1)                                | SON_HUMAN   | 263828 | 100% | 2 | 2 | 4 | 0.03% | 2.18%  |
| FTC133-p16 | (P18583) SON protein (SON3) (Negative regulatory element-binding protein) (NRE-binding protein) (DBP-5) (Bax antagonist selected in saccharomyces 1) (BASS1)                                | SON_HUMAN   | 263828 | 100% | 4 | 4 | 9 | 0.08% | 2.80%  |
| FTC133-p16 | (P18583) SON protein (SON3) (Negative regulatory element-binding protein) (NRE-binding protein) (DBP-5) (Bax antagonist selected in saccharomyces 1) (BASS1)                                | SON_HUMAN   | 263828 | 100% | 3 | 3 | 5 | 0.05% | 1.94%  |
| FTC133-p16 | (P18583) SON protein (SON3) (Negative regulatory element-binding protein) (NRE-binding protein) (DBP-5) (Bax antagonist selected in saccharomyces 1) (BASS1)                                | SON_HUMAN   | 263828 | 100% | 2 | 2 | 2 | 0.02% | 1.20%  |
| FTC133-p16 | (P18583) SON protein (SON3) (Negative regulatory element-binding protein) (NRE-binding protein) (DBP-5) (Bax antagonist selected in saccharomyces 1) (BASS1)                                | SON_HUMAN   | 263828 | 100% | 3 | 3 | 3 | 0.04% | 3.34%  |
| FTC133-p16 | (P18583) SON protein (SON3) (Negative regulatory element-binding protein) (NRE-binding protein) (DBP-5) (Bax antagonist selected in saccharomyces 1) (BASS1)                                | SON_HUMAN   | 263828 | 100% | 4 | 4 | 6 | 0.07% | 2.56%  |
| FTC133-p16 | (P18583) SON protein (SON3) (Negative regulatory element-binding protein) (NRE-binding protein) (DBP-5) (Bax antagonist selected in saccharomyces 1) (BASS1)                                | SON_HUMAN   | 263828 | 100% | 2 | 2 | 3 | 0.04% | 2.64%  |
| FTC133-p16 | (P18669) Phosphoglycerate mutase 1 (EC 5.4.2.1) (EC 5.4.2.4) (EC 3.1.3.13) (Phosphoglycerate mutase isozyme B) (PGAM-B) (BPG-dependent PGAM 1)                                              | PGAM1_HUMAN | 28656  | 100% | 2 | 4 | 4 | 0.03% | 12.60% |

## Protein Identified Sequence Coverage in FTC-133

|            |                                                                                                                                                                                   |             |       |      |   |   |   |       |        |
|------------|-----------------------------------------------------------------------------------------------------------------------------------------------------------------------------------|-------------|-------|------|---|---|---|-------|--------|
| FTC133-p16 | (P18669) Phosphoglycerate mutase 1 (EC 5.4.2.1) (EC 5.4.2.4) (EC 3.1.3.13) (Phosphoglycerate mutase isozyme B) (PGAM-B) (BPG-dependent PGAM 1)                                    | PGAM1_HUMAN | 28656 | 100% | 4 | 5 | 8 | 0.07% | 27.70% |
| FTC133-p16 | (P18669) Phosphoglycerate mutase 1 (EC 5.4.2.1) (EC 5.4.2.4) (EC 3.1.3.13) (Phosphoglycerate mutase isozyme B) (PGAM-B) (BPG-dependent PGAM 1)                                    | PGAM1_HUMAN | 28656 | 100% | 3 | 3 | 4 | 0.04% | 23.30% |
| FTC133-p16 | (P18669) Phosphoglycerate mutase 1 (EC 5.4.2.1) (EC 5.4.2.4) (EC 3.1.3.13) (Phosphoglycerate mutase isozyme B) (PGAM-B) (BPG-dependent PGAM 1)                                    | PGAM1_HUMAN | 28656 | 100% | 4 | 4 | 4 | 0.05% | 31.60% |
| FTC133-p16 | (P18669) Phosphoglycerate mutase 1 (EC 5.4.2.1) (EC 5.4.2.4) (EC 3.1.3.13) (Phosphoglycerate mutase isozyme B) (PGAM-B) (BPG-dependent PGAM 1)                                    | PGAM1_HUMAN | 28656 | 100% | 2 | 2 | 3 | 0.04% | 12.60% |
| FTC133-p16 | (P18669) Phosphoglycerate mutase 1 (EC 5.4.2.1) (EC 5.4.2.4) (EC 3.1.3.13) (Phosphoglycerate mutase isozyme B) (PGAM-B) (BPG-dependent PGAM 1)                                    | PGAM1_HUMAN | 28656 | 100% | 2 | 2 | 2 | 0.03% | 19.00% |
| FTC133-p16 | (P18669) Phosphoglycerate mutase 1 (EC 5.4.2.1) (EC 5.4.2.4) (EC 3.1.3.13) (Phosphoglycerate mutase isozyme B) (PGAM-B) (BPG-dependent PGAM 1)                                    | PGAM1_HUMAN | 28656 | 100% | 2 | 2 | 2 | 0.02% | 12.60% |
| FTC133-p16 | (P18827) Syndecan-1 precursor (SYND1) (CD138 antigen)                                                                                                                             | SDC1_HUMAN  | 32458 | 100% | 2 | 2 | 3 | 0.03% | 11.60% |
| FTC133-p16 | (P18827) Syndecan-1 precursor (SYND1) (CD138 antigen)                                                                                                                             | SDC1_HUMAN  | 32458 | 100% | 2 | 2 | 3 | 0.03% | 11.60% |
| FTC133-p16 | (P18827) Syndecan-1 precursor (SYND1) (CD138 antigen)                                                                                                                             | SDC1_HUMAN  | 32458 | 100% | 2 | 2 | 4 | 0.04% | 11.60% |
| FTC133-p16 | (P19022) Neural-cadherin precursor (N-cadherin) (Cadherin-2) (CDw325 antigen)                                                                                                     | CADH2_HUMAN | 99836 | 100% | 2 | 2 | 3 | 0.03% | 6.51%  |
| FTC133-p16 | (P19105) Myosin regulatory light chain 2, nonsarcomeric (Myosin RLC)                                                                                                              | MLRM_HUMAN  | 19646 | 100% | 2 | 3 | 3 | 0.03% | 28.20% |
| FTC133-p16 | (P19105) Myosin regulatory light chain 2, nonsarcomeric (Myosin RLC)                                                                                                              | MLRM_HUMAN  | 19646 | 100% | 2 | 2 | 3 | 0.03% | 12.40% |
| FTC133-p16 | (P19338) Nucleolin (Protein C23)                                                                                                                                                  | NUCL_HUMAN  | 76467 | 100% | 2 | 3 | 6 | 0.05% | 6.06%  |
| FTC133-p16 | (P19338) Nucleolin (Protein C23)                                                                                                                                                  | NUCL_HUMAN  | 76467 | 100% | 2 | 2 | 4 | 0.06% | 6.06%  |
| FTC133-p16 | (P20618) Proteasome subunit beta type 1 (EC 3.4.25.1) (Proteasome component C5) (Macropain subunit C5) (Multicatalytic endopeptidase complex subunit C5) (Proteasome gamma chain) | PSB1_HUMAN  | 26473 | 100% | 2 | 2 | 3 | 0.03% | 14.90% |
| FTC133-p16 | (P20618) Proteasome subunit beta type 1 (EC 3.4.25.1) (Proteasome component C5) (Macropain subunit C5) (Multicatalytic endopeptidase complex subunit C5) (Proteasome gamma chain) | PSB1_HUMAN  | 26473 | 100% | 3 | 3 | 4 | 0.04% | 15.80% |
| FTC133-p16 | (P20618) Proteasome subunit beta type 1 (EC 3.4.25.1) (Proteasome component C5) (Macropain subunit C5) (Multicatalytic endopeptidase complex subunit C5) (Proteasome gamma chain) | PSB1_HUMAN  | 26473 | 100% | 3 | 4 | 4 | 0.04% | 21.60% |

## Protein Identified Sequence Coverage in FTC-133

|            |                                                                                                                                                                                   |             |        |      |   |   |    |       |        |
|------------|-----------------------------------------------------------------------------------------------------------------------------------------------------------------------------------|-------------|--------|------|---|---|----|-------|--------|
| FTC133-p16 | (P20618) Proteasome subunit beta type 1 (EC 3.4.25.1) (Proteasome component C5) (Macropain subunit C5) (Multicatalytic endopeptidase complex subunit C5) (Proteasome gamma chain) | PSB1_HUMAN  | 26473  | 100% | 2 | 2 | 2  | 0.02% | 12.90% |
| FTC133-p16 | (P20618) Proteasome subunit beta type 1 (EC 3.4.25.1) (Proteasome component C5) (Macropain subunit C5) (Multicatalytic endopeptidase complex subunit C5) (Proteasome gamma chain) | PSB1_HUMAN  | 26473  | 100% | 4 | 4 | 5  | 0.05% | 27.40% |
| FTC133-p16 | (P20700) Lamin-B1                                                                                                                                                                 | LMNB1_HUMAN | 66260  | 100% | 3 | 3 | 4  | 0.05% | 9.06%  |
| FTC133-p16 | (P20700) Lamin-B1                                                                                                                                                                 | LMNB1_HUMAN | 66260  | 100% | 2 | 2 | 2  | 0.03% | 7.01%  |
| FTC133-p16 | (P20908) Collagen alpha-1(V) chain precursor                                                                                                                                      | CO5A1_HUMAN | 183545 | 100% | 3 | 3 | 3  | 0.03% | 3.37%  |
| FTC133-p16 | (P20908) Collagen alpha-1(V) chain precursor                                                                                                                                      | CO5A1_HUMAN | 183545 | 100% | 2 | 2 | 2  | 0.02% | 2.18%  |
| FTC133-p16 | (P21333) Filamin-A (Alpha-filamin) (Filamin-1) (Endothelial actin-binding protein) (Actin-binding protein 280) (ABP-280) (Nonmuscle filamin)                                      | FLNA_HUMAN  | 280602 | 100% | 2 | 2 | 4  | 0.03% | 1.02%  |
| FTC133-p16 | (P21333) Filamin-A (Alpha-filamin) (Filamin-1) (Endothelial actin-binding protein) (Actin-binding protein 280) (ABP-280) (Nonmuscle filamin)                                      | FLNA_HUMAN  | 280602 | 100% | 3 | 3 | 5  | 0.05% | 1.51%  |
| FTC133-p16 | (P21333) Filamin-A (Alpha-filamin) (Filamin-1) (Endothelial actin-binding protein) (Actin-binding protein 280) (ABP-280) (Nonmuscle filamin)                                      | FLNA_HUMAN  | 280602 | 100% | 3 | 3 | 3  | 0.03% | 1.51%  |
| FTC133-p16 | (P21333) Filamin-A (Alpha-filamin) (Filamin-1) (Endothelial actin-binding protein) (Actin-binding protein 280) (ABP-280) (Nonmuscle filamin)                                      | FLNA_HUMAN  | 280602 | 100% | 2 | 2 | 2  | 0.02% | 1.10%  |
| FTC133-p16 | (P21333) Filamin-A (Alpha-filamin) (Filamin-1) (Endothelial actin-binding protein) (Actin-binding protein 280) (ABP-280) (Nonmuscle filamin)                                      | FLNA_HUMAN  | 280602 | 100% | 4 | 4 | 5  | 0.06% | 2.15%  |
| FTC133-p16 | (P21333) Filamin-A (Alpha-filamin) (Filamin-1) (Endothelial actin-binding protein) (Actin-binding protein 280) (ABP-280) (Nonmuscle filamin)                                      | FLNA_HUMAN  | 280602 | 100% | 3 | 3 | 3  | 0.03% | 1.51%  |
| FTC133-p16 | (P21589) 5'-nucleotidase precursor (EC 3.1.3.5) (Ecto-5'-nucleotidase) (5'-NT) (CD73 antigen)                                                                                     | 5NTD_HUMAN  | 63351  | 100% | 3 | 3 | 3  | 0.03% | 9.41%  |
| FTC133-p16 | (P21589) 5'-nucleotidase precursor (EC 3.1.3.5) (Ecto-5'-nucleotidase) (5'-NT) (CD73 antigen)                                                                                     | 5NTD_HUMAN  | 63351  | 100% | 3 | 4 | 17 | 0.15% | 13.10% |
| FTC133-p16 | (P21589) 5'-nucleotidase precursor (EC 3.1.3.5) (Ecto-5'-nucleotidase) (5'-NT) (CD73 antigen)                                                                                     | 5NTD_HUMAN  | 63351  | 100% | 3 | 3 | 7  | 0.06% | 12.90% |
| FTC133-p16 | (P21589) 5'-nucleotidase precursor (EC 3.1.3.5) (Ecto-5'-nucleotidase) (5'-NT) (CD73 antigen)                                                                                     | 5NTD_HUMAN  | 63351  | 100% | 7 | 7 | 11 | 0.10% | 23.00% |
| FTC133-p16 | (P21589) 5'-nucleotidase precursor (EC 3.1.3.5) (Ecto-5'-nucleotidase) (5'-NT) (CD73 antigen)                                                                                     | 5NTD_HUMAN  | 63351  | 100% | 5 | 5 | 6  | 0.07% | 18.10% |
| FTC133-p16 | (P21589) 5'-nucleotidase precursor (EC 3.1.3.5) (Ecto-5'-nucleotidase) (5'-NT) (CD73 antigen)                                                                                     | 5NTD_HUMAN  | 63351  | 100% | 5 | 5 | 5  | 0.06% | 14.80% |
| FTC133-p16 | (P21589) 5'-nucleotidase precursor (EC 3.1.3.5) (Ecto-5'-nucleotidase) (5'-NT) (CD73 antigen)                                                                                     | 5NTD_HUMAN  | 63351  | 100% | 3 | 3 | 6  | 0.07% | 9.58%  |
| FTC133-p16 | (P21589) 5'-nucleotidase precursor (EC 3.1.3.5) (Ecto-5'-nucleotidase) (5'-NT) (CD73 antigen)                                                                                     | 5NTD_HUMAN  | 63351  | 100% | 3 | 4 | 4  | 0.04% | 10.30% |
| FTC133-p16 | (P21796) Voltage-dependent anion-selective channel protein 1 (VDAC-1) (hVDAC1) (Outer mitochondrial membrane protein porin 1) (Plasmalemmal porin) (Porin 31HL) (Porin 31HM)      | VDAC1_HUMAN | 30625  | 100% | 3 | 3 | 6  | 0.06% | 12.10% |
| FTC133-p16 | (P21796) Voltage-dependent anion-selective channel protein 1 (VDAC-1) (hVDAC1) (Outer mitochondrial membrane protein porin 1) (Plasmalemmal porin) (Porin 31HL) (Porin 31HM)      | VDAC1_HUMAN | 30625  | 100% | 3 | 3 | 3  | 0.03% | 16.30% |

## Protein Identified Sequence Coverage in FTC-133

|            |                                                                                                                                                                                              |             |        |      |   |   |    |       |        |
|------------|----------------------------------------------------------------------------------------------------------------------------------------------------------------------------------------------|-------------|--------|------|---|---|----|-------|--------|
| FTC133-p16 | (P21796) Voltage-dependent anion-selective channel protein 1 (VDAC-1) (hVDAC1) (Outer mitochondrial membrane protein porin 1) (Plasmalemmal porin) (Porin 31HL) (Porin 31HM)                 | VDAC1_HUMAN | 30625  | 100% | 2 | 2 | 3  | 0.04% | 14.90% |
| FTC133-p16 | (P21796) Voltage-dependent anion-selective channel protein 1 (VDAC-1) (hVDAC1) (Outer mitochondrial membrane protein porin 1) (Plasmalemmal porin) (Porin 31HL) (Porin 31HM)                 | VDAC1_HUMAN | 30625  | 100% | 2 | 2 | 3  | 0.03% | 8.16%  |
| FTC133-p16 | (P21926) CD9 antigen (p24) (Leukocyte antigen MIC3) (Motility-related protein) (MRP-1) (Tetraspanin-29) (Tspan-29)                                                                           | CD9_HUMAN   | 25268  | 100% | 2 | 3 | 5  | 0.05% | 15.40% |
| FTC133-p16 | (P21926) CD9 antigen (p24) (Leukocyte antigen MIC3) (Motility-related protein) (MRP-1) (Tetraspanin-29) (Tspan-29)                                                                           | CD9_HUMAN   | 25268  | 100% | 2 | 2 | 2  | 0.02% | 15.40% |
| FTC133-p16 | (P22307) Nonspecific lipid-transfer protein (EC 2.3.1.176) (Propanoyl-CoA C-acyltransferase) (NSL-TP) (Sterol carrier protein 2) (SCP-2) (Sterol carrier protein X) (SCP-X) (SCP-chi) (SCPX) | NLTP_HUMAN  | 58977  | 100% | 2 | 2 | 4  | 0.04% | 4.20%  |
| FTC133-p16 | (P22314) Ubiquitin-activating enzyme E1 (A1S9 protein)                                                                                                                                       | UBE1_HUMAN  | 117832 | 100% | 2 | 2 | 2  | 0.02% | 4.16%  |
| FTC133-p16 | (P22392) Nucleoside diphosphate kinase B (EC 2.7.4.6) (NDK B) (NDP kinase B) (nm23-H2) (C-myc purine-binding transcription factor PUF)                                                       | NDKB_HUMAN  | 17280  | 100% | 5 | 7 | 15 | 0.14% | 46.70% |
| FTC133-p16 | (P22392) Nucleoside diphosphate kinase B (EC 2.7.4.6) (NDK B) (NDP kinase B) (nm23-H2) (C-myc purine-binding transcription factor PUF)                                                       | NDKB_HUMAN  | 17280  | 100% | 3 | 5 | 8  | 0.09% | 30.30% |
| FTC133-p16 | (P22392) Nucleoside diphosphate kinase B (EC 2.7.4.6) (NDK B) (NDP kinase B) (nm23-H2) (C-myc purine-binding transcription factor PUF)                                                       | NDKB_HUMAN  | 17280  | 100% | 3 | 6 | 10 | 0.12% | 33.60% |
| FTC133-p16 | (P22392) Nucleoside diphosphate kinase B (EC 2.7.4.6) (NDK B) (NDP kinase B) (nm23-H2) (C-myc purine-binding transcription factor PUF)                                                       | NDKB_HUMAN  | 17280  | 100% | 3 | 4 | 7  | 0.08% | 33.60% |
| FTC133-p16 | (P22392) Nucleoside diphosphate kinase B (EC 2.7.4.6) (NDK B) (NDP kinase B) (nm23-H2) (C-myc purine-binding transcription factor PUF)                                                       | NDKB_HUMAN  | 17280  | 100% | 5 | 7 | 13 | 0.12% | 46.70% |
| FTC133-p16 | (P22626) Heterogeneous nuclear ribonucleoproteins A2/B1 (hnRNP A2 / hnRNP B1)                                                                                                                | ROA2_HUMAN  | 37412  | 100% | 2 | 2 | 3  | 0.04% | 7.37%  |
| FTC133-p16 | (P23284) Peptidyl-prolyl cis-trans isomerase B precursor (EC 5.2.1.8) (PPIase) (Rotamase) (Cyclophilin B) (S-cyclophilin) (SCYLP) (CYP-S1)                                                   | PPIB_HUMAN  | 22725  | 100% | 2 | 2 | 3  | 0.03% | 11.50% |
| FTC133-p16 | (P23284) Peptidyl-prolyl cis-trans isomerase B precursor (EC 5.2.1.8) (PPIase) (Rotamase) (Cyclophilin B) (S-cyclophilin) (SCYLP) (CYP-S1)                                                   | PPIB_HUMAN  | 22725  | 100% | 5 | 5 | 8  | 0.07% | 24.50% |
| FTC133-p16 | (P23284) Peptidyl-prolyl cis-trans isomerase B precursor (EC 5.2.1.8) (PPIase) (Rotamase) (Cyclophilin B) (S-cyclophilin) (SCYLP) (CYP-S1)                                                   | PPIB_HUMAN  | 22725  | 100% | 5 | 5 | 7  | 0.08% | 24.50% |
| FTC133-p16 | (P23284) Peptidyl-prolyl cis-trans isomerase B precursor (EC 5.2.1.8) (PPIase) (Rotamase) (Cyclophilin B) (S-cyclophilin) (SCYLP) (CYP-S1)                                                   | PPIB_HUMAN  | 22725  | 100% | 2 | 2 | 4  | 0.05% | 12.50% |
| FTC133-p16 | (P23284) Peptidyl-prolyl cis-trans isomerase B precursor (EC 5.2.1.8) (PPIase) (Rotamase) (Cyclophilin B) (S-cyclophilin) (SCYLP) (CYP-S1)                                                   | PPIB_HUMAN  | 22725  | 100% | 2 | 2 | 4  | 0.05% | 12.50% |
| FTC133-p16 | (P23284) Peptidyl-prolyl cis-trans isomerase B precursor (EC 5.2.1.8) (PPIase) (Rotamase) (Cyclophilin B) (S-cyclophilin) (SCYLP) (CYP-S1)                                                   | PPIB_HUMAN  | 22725  | 100% | 4 | 4 | 7  | 0.06% | 23.10% |



## Protein Identified Sequence Coverage in FTC-133

|            |                                                                                                                                                                                    |             |        |      |   |   |    |       |        |
|------------|------------------------------------------------------------------------------------------------------------------------------------------------------------------------------------|-------------|--------|------|---|---|----|-------|--------|
| FTC133-p16 | (P23396) 40S ribosomal protein S3                                                                                                                                                  | RS3_HUMAN   | 26671  | 100% | 2 | 2 | 2  | 0.02% | 11.90% |
| FTC133-p16 | (P23396) 40S ribosomal protein S3                                                                                                                                                  | RS3_HUMAN   | 26671  | 100% | 2 | 2 | 2  | 0.02% | 9.05%  |
| FTC133-p16 | (P23396) 40S ribosomal protein S3                                                                                                                                                  | RS3_HUMAN   | 26671  | 100% | 2 | 2 | 2  | 0.02% | 14.80% |
| FTC133-p16 | (P23528) Cofilin-1 (Cofilin, non-muscle isoform) (18 kDa phosphoprotein) (p18)                                                                                                     | COF1_HUMAN  | 18354  | 100% | 2 | 2 | 2  | 0.02% | 18.80% |
| FTC133-p16 | (P23528) Cofilin-1 (Cofilin, non-muscle isoform) (18 kDa phosphoprotein) (p18)                                                                                                     | COF1_HUMAN  | 18354  | 100% | 2 | 3 | 4  | 0.03% | 20.60% |
| FTC133-p16 | (P23528) Cofilin-1 (Cofilin, non-muscle isoform) (18 kDa phosphoprotein) (p18)                                                                                                     | COF1_HUMAN  | 18354  | 100% | 4 | 4 | 7  | 0.06% | 33.90% |
| FTC133-p16 | (P23528) Cofilin-1 (Cofilin, non-muscle isoform) (18 kDa phosphoprotein) (p18)                                                                                                     | COF1_HUMAN  | 18354  | 100% | 5 | 6 | 6  | 0.07% | 42.40% |
| FTC133-p16 | (P23528) Cofilin-1 (Cofilin, non-muscle isoform) (18 kDa phosphoprotein) (p18)                                                                                                     | COF1_HUMAN  | 18354  | 100% | 3 | 3 | 3  | 0.04% | 25.50% |
| FTC133-p16 | (P23528) Cofilin-1 (Cofilin, non-muscle isoform) (18 kDa phosphoprotein) (p18)                                                                                                     | COF1_HUMAN  | 18354  | 100% | 2 | 2 | 3  | 0.04% | 18.80% |
| FTC133-p16 | (P23528) Cofilin-1 (Cofilin, non-muscle isoform) (18 kDa phosphoprotein) (p18)                                                                                                     | COF1_HUMAN  | 18354  | 100% | 2 | 2 | 4  | 0.06% | 17.00% |
| FTC133-p16 | (P23528) Cofilin-1 (Cofilin, non-muscle isoform) (18 kDa phosphoprotein) (p18)                                                                                                     | COF1_HUMAN  | 18354  | 100% | 3 | 3 | 5  | 0.05% | 25.50% |
| FTC133-p16 | (P24539) ATP synthase B chain, mitochondrial precursor (EC 3.6.3.14)                                                                                                               | AT5F1_HUMAN | 28891  | 100% | 2 | 2 | 2  | 0.02% | 8.98%  |
| FTC133-p16 | (P24539) ATP synthase B chain, mitochondrial precursor (EC 3.6.3.14)                                                                                                               | AT5F1_HUMAN | 28891  | 100% | 2 | 2 | 2  | 0.02% | 8.98%  |
| FTC133-p16 | (P24752) Acetyl-CoA acetyltransferase, mitochondrial precursor (EC 2.3.1.9) (Acetoacetyl-CoA thiolase) (T2)                                                                        | THIL_HUMAN  | 45182  | 100% | 2 | 3 | 3  | 0.03% | 10.30% |
| FTC133-p16 | (P25705) ATP synthase alpha chain, mitochondrial precursor (EC 3.6.3.14)                                                                                                           | ATPA_HUMAN  | 59734  | 100% | 3 | 3 | 3  | 0.03% | 7.78%  |
| FTC133-p16 | (P25705) ATP synthase alpha chain, mitochondrial precursor (EC 3.6.3.14)                                                                                                           | ATPA_HUMAN  | 59734  | 100% | 4 | 4 | 5  | 0.04% | 13.00% |
| FTC133-p16 | (P25788) Proteasome subunit alpha type 3 (EC 3.4.25.1) (Proteasome component C8) (Macropain subunit C8) (Multicatalytic endopeptidase complex subunit C8)                          | PSA3_HUMAN  | 28285  | 100% | 4 | 4 | 6  | 0.06% | 18.10% |
| FTC133-p16 | (P25788) Proteasome subunit alpha type 3 (EC 3.4.25.1) (Proteasome component C8) (Macropain subunit C8) (Multicatalytic endopeptidase complex subunit C8)                          | PSA3_HUMAN  | 28285  | 100% | 2 | 2 | 3  | 0.03% | 9.84%  |
| FTC133-p16 | (P26006) Integrin alpha-3 precursor (Galactoprotein B3) (GAPB3) (VLA-3 alpha chain) (FRP-2) (CD49c antigen) [Contains: Integrin alpha-3 heavy chain; Integrin alpha-3 light chain] | ITA3_HUMAN  | 118682 | 100% | 2 | 2 | 2  | 0.02% | 3.19%  |
| FTC133-p16 | (P26006) Integrin alpha-3 precursor (Galactoprotein B3) (GAPB3) (VLA-3 alpha chain) (FRP-2) (CD49c antigen) [Contains: Integrin alpha-3 heavy chain; Integrin alpha-3 light chain] | ITA3_HUMAN  | 118682 | 100% | 2 | 3 | 14 | 0.12% | 3.38%  |
| FTC133-p16 | (P26006) Integrin alpha-3 precursor (Galactoprotein B3) (GAPB3) (VLA-3 alpha chain) (FRP-2) (CD49c antigen) [Contains: Integrin alpha-3 heavy chain; Integrin alpha-3 light chain] | ITA3_HUMAN  | 118682 | 100% | 2 | 3 | 3  | 0.03% | 2.44%  |

Protein Identified Sequence Coverage in FTC-133

|            |                                                                                                                                                                                    |             |        |      |    |    |    |       |        |
|------------|------------------------------------------------------------------------------------------------------------------------------------------------------------------------------------|-------------|--------|------|----|----|----|-------|--------|
| FTC133-p16 | (P26006) Integrin alpha-3 precursor (Galactoprotein B3) (GAPB3) (VLA-3 alpha chain) (FRP-2) (CD49c antigen) [Contains: Integrin alpha-3 heavy chain; Integrin alpha-3 light chain] | ITA3_HUMAN  | 118682 | 100% | 2  | 2  | 2  | 0.02% | 3.38%  |
| FTC133-p16 | (P26038) Moesin (Membrane-organizing extension spike protein)                                                                                                                      | MOES_HUMAN  | 67673  | 100% | 6  | 8  | 13 | 0.11% | 13.40% |
| FTC133-p16 | (P26038) Moesin (Membrane-organizing extension spike protein)                                                                                                                      | MOES_HUMAN  | 67673  | 100% | 6  | 11 | 32 | 0.27% | 17.90% |
| FTC133-p16 | (P26038) Moesin (Membrane-organizing extension spike protein)                                                                                                                      | MOES_HUMAN  | 67673  | 100% | 3  | 3  | 5  | 0.04% | 7.47%  |
| FTC133-p16 | (P26038) Moesin (Membrane-organizing extension spike protein)                                                                                                                      | MOES_HUMAN  | 67673  | 100% | 2  | 3  | 3  | 0.03% | 6.08%  |
| FTC133-p16 | (P26038) Moesin (Membrane-organizing extension spike protein)                                                                                                                      | MOES_HUMAN  | 67673  | 100% | 16 | 18 | 33 | 0.30% | 34.00% |
| FTC133-p16 | (P26038) Moesin (Membrane-organizing extension spike protein)                                                                                                                      | MOES_HUMAN  | 67673  | 100% | 15 | 16 | 25 | 0.28% | 36.80% |
| FTC133-p16 | (P26038) Moesin (Membrane-organizing extension spike protein)                                                                                                                      | MOES_HUMAN  | 67673  | 100% | 13 | 14 | 21 | 0.25% | 27.60% |
| FTC133-p16 | (P26038) Moesin (Membrane-organizing extension spike protein)                                                                                                                      | MOES_HUMAN  | 67673  | 100% | 9  | 10 | 17 | 0.20% | 19.80% |
| FTC133-p16 | (P26038) Moesin (Membrane-organizing extension spike protein)                                                                                                                      | MOES_HUMAN  | 67673  | 100% | 5  | 5  | 12 | 0.17% | 19.80% |
| FTC133-p16 | (P26038) Moesin (Membrane-organizing extension spike protein)                                                                                                                      | MOES_HUMAN  | 67673  | 100% | 13 | 15 | 19 | 0.18% | 25.00% |
| FTC133-p16 | (P26368) Splicing factor U2AF 65 kDa subunit (U2 auxiliary factor 65 kDa subunit) (U2 snRNP auxiliary factor large subunit) (hU2AF(65))                                            | U2AF2_HUMAN | 53483  | 100% | 3  | 3  | 7  | 0.06% | 16.40% |
| FTC133-p16 | (P26368) Splicing factor U2AF 65 kDa subunit (U2 auxiliary factor 65 kDa subunit) (U2 snRNP auxiliary factor large subunit) (hU2AF(65))                                            | U2AF2_HUMAN | 53483  | 100% | 2  | 2  | 3  | 0.04% | 9.47%  |
| FTC133-p16 | (P26447) Protein S100-A4 (S100 calcium-binding protein A4) (Metastasin) (Mts1 protein) (Placental calcium-binding protein) (Calvasculin)                                           | S10A4_HUMAN | 11711  | 100% | 2  | 2  | 4  | 0.04% | 19.80% |
| FTC133-p16 | (P26583) High mobility group protein B2 (High mobility group protein 2) (HMG-2)                                                                                                    | HMGB2_HUMAN | 23885  | 100% | 2  | 2  | 2  | 0.02% | 13.00% |
| FTC133-p16 | (P26599) Polypyrimidine tract-binding protein 1 (PTB) (Heterogeneous nuclear ribonucleoprotein I) (hnRNP I) (57 kDa RNA-binding protein PPTB-1)                                    | PTBP1_HUMAN | 57205  | 100% | 3  | 4  | 6  | 0.05% | 13.20% |
| FTC133-p16 | (P26599) Polypyrimidine tract-binding protein 1 (PTB) (Heterogeneous nuclear ribonucleoprotein I) (hnRNP I) (57 kDa RNA-binding protein PPTB-1)                                    | PTBP1_HUMAN | 57205  | 100% | 5  | 6  | 8  | 0.07% | 20.00% |
| FTC133-p16 | (P26599) Polypyrimidine tract-binding protein 1 (PTB) (Heterogeneous nuclear ribonucleoprotein I) (hnRNP I) (57 kDa RNA-binding protein PPTB-1)                                    | PTBP1_HUMAN | 57205  | 100% | 3  | 5  | 5  | 0.06% | 11.90% |
| FTC133-p16 | (P26599) Polypyrimidine tract-binding protein 1 (PTB) (Heterogeneous nuclear ribonucleoprotein I) (hnRNP I) (57 kDa RNA-binding protein PPTB-1)                                    | PTBP1_HUMAN | 57205  | 100% | 5  | 5  | 7  | 0.08% | 16.90% |
| FTC133-p16 | (P26599) Polypyrimidine tract-binding protein 1 (PTB) (Heterogeneous nuclear ribonucleoprotein I) (hnRNP I) (57 kDa RNA-binding protein PPTB-1)                                    | PTBP1_HUMAN | 57205  | 100% | 2  | 2  | 6  | 0.09% | 8.10%  |

Protein Identified Sequence Coverage in FTC-133

|            |                                                                                                                                                 |             |       |      |    |    |    |       |        |
|------------|-------------------------------------------------------------------------------------------------------------------------------------------------|-------------|-------|------|----|----|----|-------|--------|
| FTC133-p16 | (P26599) Polypyrimidine tract-binding protein 1 (PTB) (Heterogeneous nuclear ribonucleoprotein I) (hnRNP I) (57 kDa RNA-binding protein PPTB-1) | PTBP1_HUMAN | 57205 | 100% | 5  | 6  | 6  | 0.06% | 18.50% |
| FTC133-p16 | (P26641) Elongation factor 1-gamma (EF-1-gamma) (eEF-1B gamma)                                                                                  | EF1G_HUMAN  | 49970 | 100% | 2  | 2  | 2  | 0.02% | 7.34%  |
| FTC133-p16 | (P26641) Elongation factor 1-gamma (EF-1-gamma) (eEF-1B gamma)                                                                                  | EF1G_HUMAN  | 49970 | 100% | 3  | 3  | 5  | 0.05% | 6.19%  |
| FTC133-p16 | (P26641) Elongation factor 1-gamma (EF-1-gamma) (eEF-1B gamma)                                                                                  | EF1G_HUMAN  | 49970 | 100% | 3  | 3  | 3  | 0.03% | 8.49%  |
| FTC133-p16 | (P26641) Elongation factor 1-gamma (EF-1-gamma) (eEF-1B gamma)                                                                                  | EF1G_HUMAN  | 49970 | 100% | 3  | 3  | 3  | 0.04% | 8.72%  |
| FTC133-p16 | (P26641) Elongation factor 1-gamma (EF-1-gamma) (eEF-1B gamma)                                                                                  | EF1G_HUMAN  | 49970 | 100% | 3  | 4  | 4  | 0.05% | 8.49%  |
| FTC133-p16 | (P26641) Elongation factor 1-gamma (EF-1-gamma) (eEF-1B gamma)                                                                                  | EF1G_HUMAN  | 49970 | 100% | 3  | 3  | 5  | 0.05% | 8.49%  |
| FTC133-p16 | (P27348) 14-3-3 protein theta (14-3-3 protein tau) (14-3-3 protein T-cell) (HS1 protein)                                                        | 1433T_HUMAN | 27747 | 100% | 4  | 5  | 5  | 0.04% | 27.30% |
| FTC133-p16 | (P27348) 14-3-3 protein theta (14-3-3 protein tau) (14-3-3 protein T-cell) (HS1 protein)                                                        | 1433T_HUMAN | 27747 | 100% | 2  | 3  | 7  | 0.06% | 12.70% |
| FTC133-p16 | (P27348) 14-3-3 protein theta (14-3-3 protein tau) (14-3-3 protein T-cell) (HS1 protein)                                                        | 1433T_HUMAN | 27747 | 100% | 2  | 3  | 5  | 0.05% | 17.60% |
| FTC133-p16 | (P27348) 14-3-3 protein theta (14-3-3 protein tau) (14-3-3 protein T-cell) (HS1 protein)                                                        | 1433T_HUMAN | 27747 | 100% | 2  | 3  | 5  | 0.06% | 16.70% |
| FTC133-p16 | (P27348) 14-3-3 protein theta (14-3-3 protein tau) (14-3-3 protein T-cell) (HS1 protein)                                                        | 1433T_HUMAN | 27747 | 100% | 2  | 3  | 4  | 0.05% | 16.70% |
| FTC133-p16 | (P27348) 14-3-3 protein theta (14-3-3 protein tau) (14-3-3 protein T-cell) (HS1 protein)                                                        | 1433T_HUMAN | 27747 | 100% | 2  | 2  | 2  | 0.03% | 15.10% |
| FTC133-p16 | (P27348) 14-3-3 protein theta (14-3-3 protein tau) (14-3-3 protein T-cell) (HS1 protein)                                                        | 1433T_HUMAN | 27747 | 100% | 2  | 3  | 4  | 0.04% | 22.90% |
| FTC133-p16 | (P27695) DNA-(apurinic or apyrimidinic site) lyase (EC 4.2.99.18) (AP endonuclease 1) (APEX nuclease) (APEN) (REF-1 protein)                    | APEX1_HUMAN | 35407 | 100% | 2  | 2  | 3  | 0.03% | 8.52%  |
| FTC133-p16 | (P27695) DNA-(apurinic or apyrimidinic site) lyase (EC 4.2.99.18) (AP endonuclease 1) (APEX nuclease) (APEN) (REF-1 protein)                    | APEX1_HUMAN | 35407 | 100% | 3  | 3  | 4  | 0.04% | 15.80% |
| FTC133-p16 | (P27797) Calreticulin precursor (CRP55) (Calregulin) (HACBP) (ERp60) (grp60)                                                                    | CRTC_HUMAN  | 48125 | 100% | 2  | 2  | 4  | 0.03% | 15.60% |
| FTC133-p16 | (P27797) Calreticulin precursor (CRP55) (Calregulin) (HACBP) (ERp60) (grp60)                                                                    | CRTC_HUMAN  | 48125 | 100% | 2  | 2  | 2  | 0.02% | 9.11%  |
| FTC133-p16 | (P27797) Calreticulin precursor (CRP55) (Calregulin) (HACBP) (ERp60) (grp60)                                                                    | CRTC_HUMAN  | 48125 | 100% | 3  | 4  | 9  | 0.08% | 12.00% |
| FTC133-p16 | (P27797) Calreticulin precursor (CRP55) (Calregulin) (HACBP) (ERp60) (grp60)                                                                    | CRTC_HUMAN  | 48125 | 100% | 4  | 5  | 33 | 0.28% | 18.00% |
| FTC133-p16 | (P27797) Calreticulin precursor (CRP55) (Calregulin) (HACBP) (ERp60) (grp60)                                                                    | CRTC_HUMAN  | 48125 | 100% | 3  | 4  | 16 | 0.14% | 15.60% |
| FTC133-p16 | (P27797) Calreticulin precursor (CRP55) (Calregulin) (HACBP) (ERp60) (grp60)                                                                    | CRTC_HUMAN  | 48125 | 100% | 4  | 6  | 41 | 0.35% | 25.40% |
| FTC133-p16 | (P27797) Calreticulin precursor (CRP55) (Calregulin) (HACBP) (ERp60) (grp60)                                                                    | CRTC_HUMAN  | 48125 | 100% | 2  | 3  | 6  | 0.05% | 14.40% |
| FTC133-p16 | (P27797) Calreticulin precursor (CRP55) (Calregulin) (HACBP) (ERp60) (grp60)                                                                    | CRTC_HUMAN  | 48125 | 100% | 10 | 11 | 20 | 0.18% | 43.60% |
| FTC133-p16 | (P27797) Calreticulin precursor (CRP55) (Calregulin) (HACBP) (ERp60) (grp60)                                                                    | CRTC_HUMAN  | 48125 | 100% | 8  | 11 | 25 | 0.28% | 40.50% |
| FTC133-p16 | (P27797) Calreticulin precursor (CRP55) (Calregulin) (HACBP) (ERp60) (grp60)                                                                    | CRTC_HUMAN  | 48125 | 100% | 7  | 10 | 21 | 0.25% | 35.50% |

## Protein Identified Sequence Coverage in FTC-133

|            |                                                                                                                                                   |             |        |      |   |    |    |       |        |
|------------|---------------------------------------------------------------------------------------------------------------------------------------------------|-------------|--------|------|---|----|----|-------|--------|
| FTC133-p16 | (P27797) Calreticulin precursor (CRP55) (Calregulin) (HACBP) (ERp60) (grp60)                                                                      | CRTC_HUMAN  | 48125  | 100% | 3 | 3  | 5  | 0.06% | 14.40% |
| FTC133-p16 | (P27797) Calreticulin precursor (CRP55) (Calregulin) (HACBP) (ERp60) (grp60)                                                                      | CRTC_HUMAN  | 48125  | 100% | 3 | 3  | 9  | 0.13% | 12.70% |
| FTC133-p16 | (P27797) Calreticulin precursor (CRP55) (Calregulin) (HACBP) (ERp60) (grp60)                                                                      | CRTC_HUMAN  | 48125  | 100% | 8 | 9  | 26 | 0.24% | 29.70% |
| FTC133-p16 | (P27816) Microtubule-associated protein 4 (MAP 4)                                                                                                 | MAP4_HUMAN  | 121003 | 100% | 2 | 2  | 2  | 0.02% | 2.60%  |
| FTC133-p16 | (P27824) Calnexin precursor (Major histocompatibility complex class I antigen-binding protein p88) (p90) (IP90)                                   | CALX_HUMAN  | 67552  | 100% | 2 | 2  | 2  | 0.02% | 7.94%  |
| FTC133-p16 | (P27824) Calnexin precursor (Major histocompatibility complex class I antigen-binding protein p88) (p90) (IP90)                                   | CALX_HUMAN  | 67552  | 100% | 2 | 3  | 14 | 0.12% | 9.29%  |
| FTC133-p16 | (P27824) Calnexin precursor (Major histocompatibility complex class I antigen-binding protein p88) (p90) (IP90)                                   | CALX_HUMAN  | 67552  | 100% | 3 | 3  | 4  | 0.03% | 6.25%  |
| FTC133-p16 | (P27824) Calnexin precursor (Major histocompatibility complex class I antigen-binding protein p88) (p90) (IP90)                                   | CALX_HUMAN  | 67552  | 100% | 2 | 2  | 4  | 0.03% | 5.57%  |
| FTC133-p16 | (P27824) Calnexin precursor (Major histocompatibility complex class I antigen-binding protein p88) (p90) (IP90)                                   | CALX_HUMAN  | 67552  | 100% | 8 | 10 | 16 | 0.15% | 14.70% |
| FTC133-p16 | (P27824) Calnexin precursor (Major histocompatibility complex class I antigen-binding protein p88) (p90) (IP90)                                   | CALX_HUMAN  | 67552  | 100% | 8 | 10 | 19 | 0.21% | 16.20% |
| FTC133-p16 | (P27824) Calnexin precursor (Major histocompatibility complex class I antigen-binding protein p88) (p90) (IP90)                                   | CALX_HUMAN  | 67552  | 100% | 7 | 8  | 15 | 0.18% | 15.90% |
| FTC133-p16 | (P27824) Calnexin precursor (Major histocompatibility complex class I antigen-binding protein p88) (p90) (IP90)                                   | CALX_HUMAN  | 67552  | 100% | 5 | 6  | 11 | 0.13% | 9.12%  |
| FTC133-p16 | (P27824) Calnexin precursor (Major histocompatibility complex class I antigen-binding protein p88) (p90) (IP90)                                   | CALX_HUMAN  | 67552  | 100% | 7 | 9  | 18 | 0.17% | 15.70% |
| FTC133-p16 | (P29401) Transketolase (EC 2.2.1.1) (TK)                                                                                                          | TKT_HUMAN   | 67861  | 100% | 2 | 2  | 3  | 0.03% | 9.95%  |
| FTC133-p16 | (P29401) Transketolase (EC 2.2.1.1) (TK)                                                                                                          | TKT_HUMAN   | 67861  | 100% | 2 | 3  | 10 | 0.08% | 4.65%  |
| FTC133-p16 | (P29401) Transketolase (EC 2.2.1.1) (TK)                                                                                                          | TKT_HUMAN   | 67861  | 100% | 2 | 2  | 5  | 0.04% | 7.38%  |
| FTC133-p16 | (P29401) Transketolase (EC 2.2.1.1) (TK)                                                                                                          | TKT_HUMAN   | 67861  | 100% | 5 | 6  | 10 | 0.09% | 17.70% |
| FTC133-p16 | (P29401) Transketolase (EC 2.2.1.1) (TK)                                                                                                          | TKT_HUMAN   | 67861  | 100% | 4 | 5  | 6  | 0.07% | 14.40% |
| FTC133-p16 | (P29401) Transketolase (EC 2.2.1.1) (TK)                                                                                                          | TKT_HUMAN   | 67861  | 100% | 2 | 4  | 4  | 0.05% | 5.78%  |
| FTC133-p16 | (P29401) Transketolase (EC 2.2.1.1) (TK)                                                                                                          | TKT_HUMAN   | 67861  | 100% | 2 | 2  | 4  | 0.06% | 8.51%  |
| FTC133-p16 | (P29966) Myristoylated alanine-rich C-kinase substrate (MARCKS) (Protein kinase C substrate, 80 kDa protein, light chain) (PKCSL) (80K-L protein) | MARCS_HUMAN | 31405  | 100% | 2 | 3  | 4  | 0.03% | 15.10% |
| FTC133-p16 | (P29966) Myristoylated alanine-rich C-kinase substrate (MARCKS) (Protein kinase C substrate, 80 kDa protein, light chain) (PKCSL) (80K-L protein) | MARCS_HUMAN | 31405  | 100% | 3 | 4  | 7  | 0.06% | 30.50% |
| FTC133-p16 | (P29966) Myristoylated alanine-rich C-kinase substrate (MARCKS) (Protein kinase C substrate, 80 kDa protein, light chain) (PKCSL) (80K-L protein) | MARCS_HUMAN | 31405  | 100% | 2 | 2  | 2  | 0.02% | 20.80% |

Protein Identified Sequence Coverage in FTC-133

|            |                                                                                                                                                                                                                                                    |             |       |      |   |   |    |       |        |
|------------|----------------------------------------------------------------------------------------------------------------------------------------------------------------------------------------------------------------------------------------------------|-------------|-------|------|---|---|----|-------|--------|
| FTC133-p16 | (P29966) Myristoylated alanine-rich C-kinase substrate (MARCKS) (Protein kinase C substrate, 80 kDa protein, light chain) (PKCSL) (80K-L protein)                                                                                                  | MARCS_HUMAN | 31405 | 100% | 2 | 2 | 2  | 0.02% | 20.80% |
| FTC133-p16 | (P30040) Endoplasmic reticulum protein ERp29 precursor (ERp31) (ERp28)                                                                                                                                                                             | ERP29_HUMAN | 28977 | 100% | 3 | 3 | 5  | 0.05% | 14.20% |
| FTC133-p16 | (P30040) Endoplasmic reticulum protein ERp29 precursor (ERp31) (ERp28)                                                                                                                                                                             | ERP29_HUMAN | 28977 | 100% | 3 | 3 | 3  | 0.03% | 15.30% |
| FTC133-p16 | (P30040) Endoplasmic reticulum protein ERp29 precursor (ERp31) (ERp28)                                                                                                                                                                             | ERP29_HUMAN | 28977 | 100% | 3 | 4 | 6  | 0.05% | 25.30% |
| FTC133-p16 | (P30040) Endoplasmic reticulum protein ERp29 precursor (ERp31) (ERp28)                                                                                                                                                                             | ERP29_HUMAN | 28977 | 100% | 7 | 7 | 12 | 0.11% | 45.20% |
| FTC133-p16 | (P30040) Endoplasmic reticulum protein ERp29 precursor (ERp31) (ERp28)                                                                                                                                                                             | ERP29_HUMAN | 28977 | 100% | 7 | 7 | 13 | 0.15% | 45.20% |
| FTC133-p16 | (P30040) Endoplasmic reticulum protein ERp29 precursor (ERp31) (ERp28)                                                                                                                                                                             | ERP29_HUMAN | 28977 | 100% | 4 | 4 | 7  | 0.08% | 24.50% |
| FTC133-p16 | (P30040) Endoplasmic reticulum protein ERp29 precursor (ERp31) (ERp28)                                                                                                                                                                             | ERP29_HUMAN | 28977 | 100% | 3 | 3 | 4  | 0.05% | 12.30% |
| FTC133-p16 | (P30040) Endoplasmic reticulum protein ERp29 precursor (ERp31) (ERp28)                                                                                                                                                                             | ERP29_HUMAN | 28977 | 100% | 2 | 2 | 5  | 0.07% | 21.50% |
| FTC133-p16 | (P30040) Endoplasmic reticulum protein ERp29 precursor (ERp31) (ERp28)                                                                                                                                                                             | ERP29_HUMAN | 28977 | 100% | 6 | 6 | 9  | 0.08% | 36.00% |
| FTC133-p16 | (P30041) Peroxiredoxin-6 (EC 1.11.1.15) (Antioxidant protein 2) (1-Cys peroxiredoxin) (1-Cys PRX) (Acidic calcium-independent phospholipase A2) (EC 3.1.1.-) (aiPLA2) (Non-selenium glutathione peroxidase) (EC 1.11.1.7) (NSGPx) (24 kDa protein) | PRDX6_HUMAN | 24887 | 100% | 2 | 3 | 6  | 0.05% | 14.30% |
| FTC133-p16 | (P30041) Peroxiredoxin-6 (EC 1.11.1.15) (Antioxidant protein 2) (1-Cys peroxiredoxin) (1-Cys PRX) (Acidic calcium-independent phospholipase A2) (EC 3.1.1.-) (aiPLA2) (Non-selenium glutathione peroxidase) (EC 1.11.1.7) (NSGPx) (24 kDa protein) | PRDX6_HUMAN | 24887 | 100% | 2 | 3 | 12 | 0.10% | 15.20% |
| FTC133-p16 | (P30041) Peroxiredoxin-6 (EC 1.11.1.15) (Antioxidant protein 2) (1-Cys peroxiredoxin) (1-Cys PRX) (Acidic calcium-independent phospholipase A2) (EC 3.1.1.-) (aiPLA2) (Non-selenium glutathione peroxidase) (EC 1.11.1.7) (NSGPx) (24 kDa protein) | PRDX6_HUMAN | 24887 | 100% | 6 | 8 | 14 | 0.13% | 39.00% |
| FTC133-p16 | (P30041) Peroxiredoxin-6 (EC 1.11.1.15) (Antioxidant protein 2) (1-Cys peroxiredoxin) (1-Cys PRX) (Acidic calcium-independent phospholipase A2) (EC 3.1.1.-) (aiPLA2) (Non-selenium glutathione peroxidase) (EC 1.11.1.7) (NSGPx) (24 kDa protein) | PRDX6_HUMAN | 24887 | 100% | 5 | 7 | 10 | 0.11% | 33.60% |
| FTC133-p16 | (P30041) Peroxiredoxin-6 (EC 1.11.1.15) (Antioxidant protein 2) (1-Cys peroxiredoxin) (1-Cys PRX) (Acidic calcium-independent phospholipase A2) (EC 3.1.1.-) (aiPLA2) (Non-selenium glutathione peroxidase) (EC 1.11.1.7) (NSGPx) (24 kDa protein) | PRDX6_HUMAN | 24887 | 100% | 4 | 6 | 10 | 0.12% | 28.70% |

## Protein Identified Sequence Coverage in FTC-133

|            |                                                                                                                                                                                                                                                    |             |       |      |    |    |    |       |        |
|------------|----------------------------------------------------------------------------------------------------------------------------------------------------------------------------------------------------------------------------------------------------|-------------|-------|------|----|----|----|-------|--------|
| FTC133-p16 | (P30041) Peroxiredoxin-6 (EC 1.11.1.15) (Antioxidant protein 2) (1-Cys peroxiredoxin) (1-Cys PRX) (Acidic calcium-independent phospholipase A2) (EC 3.1.1.-) (aiPLA2) (Non-selenium glutathione peroxidase) (EC 1.11.1.7) (NSGPx) (24 kDa protein) | PRDX6_HUMAN | 24887 | 100% | 4  | 4  | 9  | 0.11% | 28.70% |
| FTC133-p16 | (P30041) Peroxiredoxin-6 (EC 1.11.1.15) (Antioxidant protein 2) (1-Cys peroxiredoxin) (1-Cys PRX) (Acidic calcium-independent phospholipase A2) (EC 3.1.1.-) (aiPLA2) (Non-selenium glutathione peroxidase) (EC 1.11.1.7) (NSGPx) (24 kDa protein) | PRDX6_HUMAN | 24887 | 100% | 5  | 6  | 7  | 0.06% | 33.60% |
| FTC133-p16 | (P30044) Peroxiredoxin-5, mitochondrial precursor (EC 1.11.1.15) (Prx-V) (Peroxisomal antioxidant enzyme) (PLP) (Thioredoxin reductase) (Thioredoxin peroxidase PMP20) (Antioxidant enzyme B166) (AOEB166) (TPx type VI) (Liver tissue 2D-page spo | PRDX5_HUMAN | 22008 | 100% | 2  | 2  | 2  | 0.02% | 13.60% |
| FTC133-p16 | (P30044) Peroxiredoxin-5, mitochondrial precursor (EC 1.11.1.15) (Prx-V) (Peroxisomal antioxidant enzyme) (PLP) (Thioredoxin reductase) (Thioredoxin peroxidase PMP20) (Antioxidant enzyme B166) (AOEB166) (TPx type VI) (Liver tissue 2D-page spo | PRDX5_HUMAN | 22008 | 100% | 2  | 2  | 2  | 0.02% | 16.40% |
| FTC133-p16 | (P30044) Peroxiredoxin-5, mitochondrial precursor (EC 1.11.1.15) (Prx-V) (Peroxisomal antioxidant enzyme) (PLP) (Thioredoxin reductase) (Thioredoxin peroxidase PMP20) (Antioxidant enzyme B166) (AOEB166) (TPx type VI) (Liver tissue 2D-page spo | PRDX5_HUMAN | 22008 | 100% | 3  | 3  | 4  | 0.04% | 21.50% |
| FTC133-p16 | (P30048) Thioredoxin-dependent peroxide reductase, mitochondrial precursor (EC 1.11.1.15) (Peroxiredoxin-3) (Antioxidant protein 1) (AOP-1) (MER5 protein homolog) (HBC189) (PRX III)                                                              | PRDX3_HUMAN | 27675 | 100% | 2  | 2  | 4  | 0.04% | 9.77%  |
| FTC133-p16 | (P30050) 60S ribosomal protein L12                                                                                                                                                                                                                 | RL12_HUMAN  | 17801 | 100% | 2  | 2  | 2  | 0.02% | 18.80% |
| FTC133-p16 | (P30050) 60S ribosomal protein L12                                                                                                                                                                                                                 | RL12_HUMAN  | 17801 | 100% | 2  | 2  | 2  | 0.02% | 18.80% |
| FTC133-p16 | (P30101) Protein disulfide-isomerase A3 precursor (EC 5.3.4.1) (Disulfide isomerase ER-60) (ERp60) (58 kDa microsomal protein) (p58) (ERp57) (58 kDa glucose-regulated protein)                                                                    | PDIA3_HUMAN | 56767 | 100% | 6  | 6  | 10 | 0.09% | 15.60% |
| FTC133-p16 | (P30101) Protein disulfide-isomerase A3 precursor (EC 5.3.4.1) (Disulfide isomerase ER-60) (ERp60) (58 kDa microsomal protein) (p58) (ERp57) (58 kDa glucose-regulated protein)                                                                    | PDIA3_HUMAN | 56767 | 100% | 5  | 6  | 10 | 0.09% | 21.00% |
| FTC133-p16 | (P30101) Protein disulfide-isomerase A3 precursor (EC 5.3.4.1) (Disulfide isomerase ER-60) (ERp60) (58 kDa microsomal protein) (p58) (ERp57) (58 kDa glucose-regulated protein)                                                                    | PDIA3_HUMAN | 56767 | 100% | 4  | 4  | 6  | 0.05% | 9.90%  |
| FTC133-p16 | (P30101) Protein disulfide-isomerase A3 precursor (EC 5.3.4.1) (Disulfide isomerase ER-60) (ERp60) (58 kDa microsomal protein) (p58) (ERp57) (58 kDa glucose-regulated protein)                                                                    | PDIA3_HUMAN | 56767 | 100% | 2  | 4  | 16 | 0.14% | 8.91%  |
| FTC133-p16 | (P30101) Protein disulfide-isomerase A3 precursor (EC 5.3.4.1) (Disulfide isomerase ER-60) (ERp60) (58 kDa microsomal protein) (p58) (ERp57) (58 kDa glucose-regulated protein)                                                                    | PDIA3_HUMAN | 56767 | 100% | 15 | 17 | 30 | 0.28% | 34.30% |

## Protein Identified Sequence Coverage in FTC-133

|            |                                                                                                                                                                                                                    |             |       |      |    |    |    |       |        |
|------------|--------------------------------------------------------------------------------------------------------------------------------------------------------------------------------------------------------------------|-------------|-------|------|----|----|----|-------|--------|
| FTC133-p16 | (P30101) Protein disulfide-isomerase A3 precursor (EC 5.3.4.1) (Disulfide isomerase ER-60) (ERp60) (58 kDa microsomal protein) (p58) (ERp57) (58 kDa glucose-regulated protein)                                    | PDIA3_HUMAN | 56767 | 100% | 9  | 11 | 19 | 0.21% | 24.80% |
| FTC133-p16 | (P30101) Protein disulfide-isomerase A3 precursor (EC 5.3.4.1) (Disulfide isomerase ER-60) (ERp60) (58 kDa microsomal protein) (p58) (ERp57) (58 kDa glucose-regulated protein)                                    | PDIA3_HUMAN | 56767 | 100% | 13 | 13 | 14 | 0.17% | 31.10% |
| FTC133-p16 | (P30101) Protein disulfide-isomerase A3 precursor (EC 5.3.4.1) (Disulfide isomerase ER-60) (ERp60) (58 kDa microsomal protein) (p58) (ERp57) (58 kDa glucose-regulated protein)                                    | PDIA3_HUMAN | 56767 | 100% | 8  | 8  | 12 | 0.14% | 24.00% |
| FTC133-p16 | (P30101) Protein disulfide-isomerase A3 precursor (EC 5.3.4.1) (Disulfide isomerase ER-60) (ERp60) (58 kDa microsomal protein) (p58) (ERp57) (58 kDa glucose-regulated protein)                                    | PDIA3_HUMAN | 56767 | 100% | 2  | 2  | 4  | 0.06% | 8.91%  |
| FTC133-p16 | (P30101) Protein disulfide-isomerase A3 precursor (EC 5.3.4.1) (Disulfide isomerase ER-60) (ERp60) (58 kDa microsomal protein) (p58) (ERp57) (58 kDa glucose-regulated protein)                                    | PDIA3_HUMAN | 56767 | 100% | 17 | 19 | 35 | 0.32% | 42.40% |
| FTC133-p16 | (P31946) 14-3-3 protein beta/alpha (Protein kinase C inhibitor protein 1) (KCIP-1) (Protein 1054)                                                                                                                  | 1433B_HUMAN | 27934 | 100% | 2  | 2  | 3  | 0.03% | 20.00% |
| FTC133-p16 | (P31946) 14-3-3 protein beta/alpha (Protein kinase C inhibitor protein 1) (KCIP-1) (Protein 1054)                                                                                                                  | 1433B_HUMAN | 27934 | 100% | 2  | 3  | 3  | 0.03% | 16.70% |
| FTC133-p16 | (P31946) 14-3-3 protein beta/alpha (Protein kinase C inhibitor protein 1) (KCIP-1) (Protein 1054)                                                                                                                  | 1433B_HUMAN | 27934 | 100% | 2  | 3  | 4  | 0.04% | 16.70% |
| FTC133-p16 | (P31946) 14-3-3 protein beta/alpha (Protein kinase C inhibitor protein 1) (KCIP-1) (Protein 1054)                                                                                                                  | 1433B_HUMAN | 27934 | 100% | 2  | 2  | 3  | 0.04% | 16.70% |
| FTC133-p16 | (P31946) 14-3-3 protein beta/alpha (Protein kinase C inhibitor protein 1) (KCIP-1) (Protein 1054)                                                                                                                  | 1433B_HUMAN | 27934 | 100% | 2  | 2  | 3  | 0.04% | 15.50% |
| FTC133-p16 | (P31946) 14-3-3 protein beta/alpha (Protein kinase C inhibitor protein 1) (KCIP-1) (Protein 1054)                                                                                                                  | 1433B_HUMAN | 27934 | 100% | 2  | 2  | 2  | 0.02% | 20.80% |
| FTC133-p16 | (P31949) Protein S100-A11 (S100 calcium-binding protein A11) (Protein S100C) (Calgizzarin) (MLN 70)                                                                                                                | S10AB_HUMAN | 11723 | 100% | 2  | 2  | 3  | 0.03% | 25.70% |
| FTC133-p16 | (P31949) Protein S100-A11 (S100 calcium-binding protein A11) (Protein S100C) (Calgizzarin) (MLN 70)                                                                                                                | S10AB_HUMAN | 11723 | 100% | 2  | 2  | 2  | 0.02% | 25.70% |
| FTC133-p16 | (P31949) Protein S100-A11 (S100 calcium-binding protein A11) (Protein S100C) (Calgizzarin) (MLN 70)                                                                                                                | S10AB_HUMAN | 11723 | 100% | 2  | 2  | 4  | 0.05% | 25.70% |
| FTC133-p16 | (P32119) Peroxiredoxin-2 (EC 1.11.1.15) (Thioredoxin peroxidase 1) (Thioredoxin-dependent peroxide reductase 1) (Thiol-specific antioxidant protein) (TSA) (PRP) (Natural killer cell-enhancing factor B) (NKEF-B) | PRDX2_HUMAN | 21743 | 100% | 2  | 2  | 2  | 0.02% | 15.20% |
| FTC133-p16 | (P32119) Peroxiredoxin-2 (EC 1.11.1.15) (Thioredoxin peroxidase 1) (Thioredoxin-dependent peroxide reductase 1) (Thiol-specific antioxidant protein) (TSA) (PRP) (Natural killer cell-enhancing factor B) (NKEF-B) | PRDX2_HUMAN | 21743 | 100% | 2  | 3  | 9  | 0.08% | 21.30% |

## Protein Identified Sequence Coverage in FTC-133

|            |                                                                                                                                                                                                                       |             |       |      |   |   |   |       |        |
|------------|-----------------------------------------------------------------------------------------------------------------------------------------------------------------------------------------------------------------------|-------------|-------|------|---|---|---|-------|--------|
| FTC133-p16 | (P32119) Peroxiredoxin-2 (EC 1.11.1.15)<br>(Thioredoxin peroxidase 1) (Thioredoxin-dependent peroxide reductase 1) (Thiol-specific antioxidant protein) (TSA) (PRP) (Natural killer cell-enhancing factor B) (NKEF-B) | PRDX2_HUMAN | 21743 | 100% | 3 | 4 | 7 | 0.06% | 19.80% |
| FTC133-p16 | (P32119) Peroxiredoxin-2 (EC 1.11.1.15)<br>(Thioredoxin peroxidase 1) (Thioredoxin-dependent peroxide reductase 1) (Thiol-specific antioxidant protein) (TSA) (PRP) (Natural killer cell-enhancing factor B) (NKEF-B) | PRDX2_HUMAN | 21743 | 100% | 3 | 4 | 8 | 0.09% | 19.30% |
| FTC133-p16 | (P32119) Peroxiredoxin-2 (EC 1.11.1.15)<br>(Thioredoxin peroxidase 1) (Thioredoxin-dependent peroxide reductase 1) (Thiol-specific antioxidant protein) (TSA) (PRP) (Natural killer cell-enhancing factor B) (NKEF-B) | PRDX2_HUMAN | 21743 | 100% | 2 | 2 | 6 | 0.07% | 9.14%  |
| FTC133-p16 | (P32119) Peroxiredoxin-2 (EC 1.11.1.15)<br>(Thioredoxin peroxidase 1) (Thioredoxin-dependent peroxide reductase 1) (Thiol-specific antioxidant protein) (TSA) (PRP) (Natural killer cell-enhancing factor B) (NKEF-B) | PRDX2_HUMAN | 21743 | 100% | 2 | 3 | 6 | 0.07% | 14.70% |
| FTC133-p16 | (P32119) Peroxiredoxin-2 (EC 1.11.1.15)<br>(Thioredoxin peroxidase 1) (Thioredoxin-dependent peroxide reductase 1) (Thiol-specific antioxidant protein) (TSA) (PRP) (Natural killer cell-enhancing factor B) (NKEF-B) | PRDX2_HUMAN | 21743 | 100% | 3 | 4 | 9 | 0.08% | 19.30% |
| FTC133-p16 | (P32970) Tumor necrosis factor ligand superfamily member 7 (CD27 ligand) (CD27-L) (CD70 antigen)                                                                                                                      | TNFL7_HUMAN | 21100 | 100% | 4 | 4 | 9 | 0.08% | 25.90% |
| FTC133-p16 | (P32970) Tumor necrosis factor ligand superfamily member 7 (CD27 ligand) (CD27-L) (CD70 antigen)                                                                                                                      | TNFL7_HUMAN | 21100 | 100% | 3 | 3 | 5 | 0.06% | 18.10% |
| FTC133-p16 | (P32970) Tumor necrosis factor ligand superfamily member 7 (CD27 ligand) (CD27-L) (CD70 antigen)                                                                                                                      | TNFL7_HUMAN | 21100 | 100% | 2 | 2 | 2 | 0.02% | 13.00% |
| FTC133-p16 | (P32970) Tumor necrosis factor ligand superfamily member 7 (CD27 ligand) (CD27-L) (CD70 antigen)                                                                                                                      | TNFL7_HUMAN | 21100 | 100% | 2 | 2 | 2 | 0.02% | 14.00% |
| FTC133-p16 | (P32970) Tumor necrosis factor ligand superfamily member 7 (CD27 ligand) (CD27-L) (CD70 antigen)                                                                                                                      | TNFL7_HUMAN | 21100 | 100% | 4 | 5 | 9 | 0.08% | 20.20% |
| FTC133-p16 | (P34059) N-acetylgalactosamine-6-sulfatase precursor (EC 3.1.6.4) (N-acetylgalactosamine-6-sulfate sulfatase) (Galactose-6-sulfate sulfatase) (GalNAc6S sulfatase) (Chondroitinsulfatase)                             | GA6S_HUMAN  | 58009 | 100% | 2 | 2 | 2 | 0.02% | 7.85%  |
| FTC133-p16 | (P34059) N-acetylgalactosamine-6-sulfatase precursor (EC 3.1.6.4) (N-acetylgalactosamine-6-sulfate sulfatase) (Galactose-6-sulfate sulfatase) (GalNAc6S sulfatase) (Chondroitinsulfatase)                             | GA6S_HUMAN  | 58009 | 100% | 2 | 2 | 2 | 0.02% | 7.66%  |
| FTC133-p16 | (P34932) Heat shock 70 kDa protein 4 (Heat shock 70-related protein APG-2) (HSP70RY)                                                                                                                                  | HSP74_HUMAN | 94283 | 100% | 3 | 4 | 5 | 0.04% | 5.83%  |
| FTC133-p16 | (P35052) Glypican-1 precursor                                                                                                                                                                                         | GPC1_HUMAN  | 61633 | 100% | 5 | 6 | 9 | 0.08% | 14.20% |
| FTC133-p16 | (P35052) Glypican-1 precursor                                                                                                                                                                                         | GPC1_HUMAN  | 61633 | 100% | 6 | 6 | 9 | 0.08% | 16.30% |
| FTC133-p16 | (P35052) Glypican-1 precursor                                                                                                                                                                                         | GPC1_HUMAN  | 61633 | 100% | 2 | 2 | 3 | 0.03% | 5.56%  |
| FTC133-p16 | (P35052) Glypican-1 precursor                                                                                                                                                                                         | GPC1_HUMAN  | 61633 | 100% | 3 | 3 | 4 | 0.05% | 8.78%  |
| FTC133-p16 | (P35052) Glypican-1 precursor                                                                                                                                                                                         | GPC1_HUMAN  | 61633 | 100% | 2 | 2 | 4 | 0.05% | 5.56%  |



## Protein Identified Sequence Coverage in FTC-133

|            |                                                                                                                                                                                                                                                      |            |       |      |   |   |    |       |        |
|------------|------------------------------------------------------------------------------------------------------------------------------------------------------------------------------------------------------------------------------------------------------|------------|-------|------|---|---|----|-------|--------|
| FTC133-p16 | (P35052) Glypican-1 precursor                                                                                                                                                                                                                        | GPC1_HUMAN | 61633 | 100% | 4 | 4 | 4  | 0.04% | 13.10% |
| FTC133-p16 | (P35241) Radixin                                                                                                                                                                                                                                     | RADI_HUMAN | 68548 | 100% | 2 | 4 | 11 | 0.09% | 10.60% |
| FTC133-p16 | (P35241) Radixin                                                                                                                                                                                                                                     | RADI_HUMAN | 68548 | 100% | 3 | 3 | 4  | 0.05% | 12.90% |
| FTC133-p16 | (P35613) Basigin precursor (Leukocyte activation antigen M6) (Collagenase stimulatory factor) (Extracellular matrix metalloproteinase inducer) (EMMPRIN) (5F7) (Tumor cell-derived collagenase stimulatory factor) (TCSF) (OK blood group antigen)   | BASI_HUMAN | 42182 | 100% | 2 | 2 | 3  | 0.03% | 9.35%  |
| FTC133-p16 | (P35613) Basigin precursor (Leukocyte activation antigen M6) (Collagenase stimulatory factor) (Extracellular matrix metalloproteinase inducer) (EMMPRIN) (5F7) (Tumor cell-derived collagenase stimulatory factor) (TCSF) (OK blood group antigen)   | BASI_HUMAN | 42182 | 100% | 7 | 8 | 15 | 0.14% | 31.40% |
| FTC133-p16 | (P35613) Basigin precursor (Leukocyte activation antigen M6) (Collagenase stimulatory factor) (Extracellular matrix metalloproteinase inducer) (EMMPRIN) (5F7) (Tumor cell-derived collagenase stimulatory factor) (TCSF) (OK blood group antigen)   | BASI_HUMAN | 42182 | 100% | 4 | 5 | 7  | 0.08% | 20.00% |
| FTC133-p16 | (P35613) Basigin precursor (Leukocyte activation antigen M6) (Collagenase stimulatory factor) (Extracellular matrix metalloproteinase inducer) (EMMPRIN) (5F7) (Tumor cell-derived collagenase stimulatory factor) (TCSF) (OK blood group antigen)   | BASI_HUMAN | 42182 | 100% | 3 | 3 | 4  | 0.05% | 16.40% |
| FTC133-p16 | (P35613) Basigin precursor (Leukocyte activation antigen M6) (Collagenase stimulatory factor) (Extracellular matrix metalloproteinase inducer) (EMMPRIN) (5F7) (Tumor cell-derived collagenase stimulatory factor) (TCSF) (OK blood group antigen)   | BASI_HUMAN | 42182 | 100% | 2 | 2 | 2  | 0.02% | 7.27%  |
| FTC133-p16 | (P35613) Basigin precursor (Leukocyte activation antigen M6) (Collagenase stimulatory factor) (Extracellular matrix metalloproteinase inducer) (EMMPRIN) (5F7) (Tumor cell-derived collagenase stimulatory factor) (TCSF) (OK blood group antigen)   | BASI_HUMAN | 42182 | 100% | 6 | 6 | 12 | 0.11% | 27.30% |
| FTC133-p16 | (P36957) Dihydrolipoyllysine-residue succinyltransferase component of 2-oxoglutarate dehydrogenase complex, mitochondrial precursor (EC 2.3.1.61) (Dihydrolipoamide succinyltransferase component of 2-oxoglutarate dehydrogenase complex) (E2) (E2) | ODO2_HUMAN | 48622 | 100% | 2 | 3 | 3  | 0.03% | 7.28%  |
| FTC133-p16 | (P36957) Dihydrolipoyllysine-residue succinyltransferase component of 2-oxoglutarate dehydrogenase complex, mitochondrial precursor (EC 2.3.1.61) (Dihydrolipoamide succinyltransferase component of 2-oxoglutarate dehydrogenase complex) (E2) (E2) | ODO2_HUMAN | 48622 | 100% | 3 | 4 | 4  | 0.03% | 8.39%  |
| FTC133-p16 | (P36957) Dihydrolipoyllysine-residue succinyltransferase component of 2-oxoglutarate dehydrogenase complex, mitochondrial precursor (EC 2.3.1.61) (Dihydrolipoamide succinyltransferase component of 2-oxoglutarate dehydrogenase complex) (E2) (E2) | ODO2_HUMAN | 48622 | 100% | 2 | 2 | 2  | 0.02% | 7.28%  |

## Protein Identified Sequence Coverage in FTC-133

|            |                                                                                                                                                                                    |             |       |      |   |   |    |       |        |
|------------|------------------------------------------------------------------------------------------------------------------------------------------------------------------------------------|-------------|-------|------|---|---|----|-------|--------|
| FTC133-p16 | (P37108) Signal recognition particle 14 kDa protein (SRP14) (18 kDa Alu RNA-binding protein)                                                                                       | SRP14_HUMAN | 14527 | 100% | 2 | 2 | 5  | 0.04% | 17.60% |
| FTC133-p16 | (P37802) Transgelin-2 (SM22-alpha homolog)                                                                                                                                         | TAGL2_HUMAN | 22243 | 100% | 2 | 2 | 4  | 0.03% | 14.10% |
| FTC133-p16 | (P37802) Transgelin-2 (SM22-alpha homolog)                                                                                                                                         | TAGL2_HUMAN | 22243 | 100% | 3 | 3 | 10 | 0.08% | 22.20% |
| FTC133-p16 | (P37802) Transgelin-2 (SM22-alpha homolog)                                                                                                                                         | TAGL2_HUMAN | 22243 | 100% | 4 | 4 | 7  | 0.06% | 27.30% |
| FTC133-p16 | (P37802) Transgelin-2 (SM22-alpha homolog)                                                                                                                                         | TAGL2_HUMAN | 22243 | 100% | 4 | 4 | 9  | 0.10% | 29.30% |
| FTC133-p16 | (P37802) Transgelin-2 (SM22-alpha homolog)                                                                                                                                         | TAGL2_HUMAN | 22243 | 100% | 3 | 3 | 5  | 0.06% | 23.20% |
| FTC133-p16 | (P37802) Transgelin-2 (SM22-alpha homolog)                                                                                                                                         | TAGL2_HUMAN | 22243 | 100% | 2 | 2 | 4  | 0.05% | 14.10% |
| FTC133-p16 | (P37802) Transgelin-2 (SM22-alpha homolog)                                                                                                                                         | TAGL2_HUMAN | 22243 | 100% | 3 | 3 | 7  | 0.06% | 22.20% |
| FTC133-p16 | (P37837) Transaldolase (EC 2.2.1.2)                                                                                                                                                | TALDO_HUMAN | 37524 | 100% | 2 | 2 | 3  | 0.03% | 5.93%  |
| FTC133-p16 | (P37837) Transaldolase (EC 2.2.1.2)                                                                                                                                                | TALDO_HUMAN | 37524 | 100% | 7 | 7 | 12 | 0.11% | 26.40% |
| FTC133-p16 | (P37837) Transaldolase (EC 2.2.1.2)                                                                                                                                                | TALDO_HUMAN | 37524 | 100% | 3 | 3 | 5  | 0.06% | 10.70% |
| FTC133-p16 | (P37837) Transaldolase (EC 2.2.1.2)                                                                                                                                                | TALDO_HUMAN | 37524 | 100% | 3 | 3 | 5  | 0.06% | 10.40% |
| FTC133-p16 | (P37837) Transaldolase (EC 2.2.1.2)                                                                                                                                                | TALDO_HUMAN | 37524 | 100% | 3 | 3 | 7  | 0.08% | 10.40% |
| FTC133-p16 | (P37837) Transaldolase (EC 2.2.1.2)                                                                                                                                                | TALDO_HUMAN | 37524 | 100% | 7 | 7 | 12 | 0.11% | 23.10% |
| FTC133-p16 | (P38646) Stress-70 protein, mitochondrial precursor (75 kDa glucose-regulated protein) (GRP 75) (Peptide-binding protein 74) (PBP74) (Mortalin) (MOT)                              | GRP75_HUMAN | 73663 | 100% | 3 | 3 | 5  | 0.04% | 6.63%  |
| FTC133-p16 | (P38646) Stress-70 protein, mitochondrial precursor (75 kDa glucose-regulated protein) (GRP 75) (Peptide-binding protein 74) (PBP74) (Mortalin) (MOT)                              | GRP75_HUMAN | 73663 | 100% | 7 | 7 | 10 | 0.09% | 15.60% |
| FTC133-p16 | (P38646) Stress-70 protein, mitochondrial precursor (75 kDa glucose-regulated protein) (GRP 75) (Peptide-binding protein 74) (PBP74) (Mortalin) (MOT)                              | GRP75_HUMAN | 73663 | 100% | 3 | 3 | 3  | 0.03% | 6.92%  |
| FTC133-p16 | (P38646) Stress-70 protein, mitochondrial precursor (75 kDa glucose-regulated protein) (GRP 75) (Peptide-binding protein 74) (PBP74) (Mortalin) (MOT)                              | GRP75_HUMAN | 73663 | 100% | 4 | 4 | 4  | 0.05% | 8.69%  |
| FTC133-p16 | (P38646) Stress-70 protein, mitochondrial precursor (75 kDa glucose-regulated protein) (GRP 75) (Peptide-binding protein 74) (PBP74) (Mortalin) (MOT)                              | GRP75_HUMAN | 73663 | 100% | 2 | 2 | 2  | 0.02% | 4.12%  |
| FTC133-p16 | (P38646) Stress-70 protein, mitochondrial precursor (75 kDa glucose-regulated protein) (GRP 75) (Peptide-binding protein 74) (PBP74) (Mortalin) (MOT)                              | GRP75_HUMAN | 73663 | 100% | 6 | 6 | 6  | 0.06% | 12.80% |
| FTC133-p16 | (P39656) Dolichyl-diphosphooligosaccharide--protein glycosyltransferase 48 kDa subunit precursor (EC 2.4.1.119) (Oligosaccharyl transferase 48 kDa subunit) (DDOST 48 kDa subunit) | OST48_HUMAN | 48793 | 100% | 3 | 3 | 3  | 0.03% | 8.66%  |
| FTC133-p16 | (P39656) Dolichyl-diphosphooligosaccharide--protein glycosyltransferase 48 kDa subunit precursor (EC 2.4.1.119) (Oligosaccharyl transferase 48 kDa subunit) (DDOST 48 kDa subunit) | OST48_HUMAN | 48793 | 100% | 2 | 2 | 2  | 0.02% | 5.01%  |
| FTC133-p16 | (P40227) T-complex protein 1 subunit zeta (TCP-1-zeta) (CCT-zeta) (CCT-zeta-1) (Tcp20) (HTR3) (Acute morphine dependence-related protein 2)                                        | TCPZ_HUMAN  | 57876 | 100% | 4 | 4 | 5  | 0.04% | 13.40% |
| FTC133-p16 | (P40227) T-complex protein 1 subunit zeta (TCP-1-zeta) (CCT-zeta) (CCT-zeta-1) (Tcp20) (HTR3) (Acute morphine dependence-related protein 2)                                        | TCPZ_HUMAN  | 57876 | 100% | 2 | 3 | 5  | 0.04% | 7.17%  |

## Protein Identified Sequence Coverage in FTC-133

|            |                                                                                                                                                                                                                                                    |             |       |      |   |   |    |       |        |
|------------|----------------------------------------------------------------------------------------------------------------------------------------------------------------------------------------------------------------------------------------------------|-------------|-------|------|---|---|----|-------|--------|
| FTC133-p16 | (P40227) T-complex protein 1 subunit zeta (TCP-1-zeta) (CCT-zeta) (CCT-zeta-1) (Tcp20) (HTR3) (Acute morphine dependence-related protein 2)                                                                                                        | TCPZ_HUMAN  | 57876 | 100% | 3 | 4 | 7  | 0.06% | 14.00% |
| FTC133-p16 | (P40227) T-complex protein 1 subunit zeta (TCP-1-zeta) (CCT-zeta) (CCT-zeta-1) (Tcp20) (HTR3) (Acute morphine dependence-related protein 2)                                                                                                        | TCPZ_HUMAN  | 57876 | 100% | 2 | 3 | 5  | 0.05% | 8.68%  |
| FTC133-p16 | (P40227) T-complex protein 1 subunit zeta (TCP-1-zeta) (CCT-zeta) (CCT-zeta-1) (Tcp20) (HTR3) (Acute morphine dependence-related protein 2)                                                                                                        | TCPZ_HUMAN  | 57876 | 100% | 4 | 4 | 8  | 0.12% | 15.80% |
| FTC133-p16 | (P40926) Malate dehydrogenase, mitochondrial precursor (EC 1.1.1.37)                                                                                                                                                                               | MDHM_HUMAN  | 35514 | 100% | 3 | 3 | 3  | 0.03% | 11.20% |
| FTC133-p16 | (P40926) Malate dehydrogenase, mitochondrial precursor (EC 1.1.1.37)                                                                                                                                                                               | MDHM_HUMAN  | 35514 | 100% | 2 | 3 | 5  | 0.04% | 8.88%  |
| FTC133-p16 | (P40926) Malate dehydrogenase, mitochondrial precursor (EC 1.1.1.37)                                                                                                                                                                               | MDHM_HUMAN  | 35514 | 100% | 9 | 9 | 15 | 0.14% | 37.30% |
| FTC133-p16 | (P40926) Malate dehydrogenase, mitochondrial precursor (EC 1.1.1.37)                                                                                                                                                                               | MDHM_HUMAN  | 35514 | 100% | 6 | 6 | 9  | 0.10% | 26.00% |
| FTC133-p16 | (P40926) Malate dehydrogenase, mitochondrial precursor (EC 1.1.1.37)                                                                                                                                                                               | MDHM_HUMAN  | 35514 | 100% | 4 | 4 | 5  | 0.06% | 18.90% |
| FTC133-p16 | (P40926) Malate dehydrogenase, mitochondrial precursor (EC 1.1.1.37)                                                                                                                                                                               | MDHM_HUMAN  | 35514 | 100% | 5 | 5 | 7  | 0.08% | 21.30% |
| FTC133-p16 | (P40926) Malate dehydrogenase, mitochondrial precursor (EC 1.1.1.37)                                                                                                                                                                               | MDHM_HUMAN  | 35514 | 100% | 7 | 7 | 11 | 0.10% | 29.90% |
| FTC133-p16 | (P42167) Lamina-associated polypeptide 2, isoforms beta/gamma (Thymopoietin, isoforms beta/gamma) (TP beta/gamma) (Thymopoietin-related peptide isoforms beta/gamma) (TPRP isoforms beta/gamma) [Contains: Thymopoietin (TP) (Splenin); Thymopenti | LAP2B_HUMAN | 50522 | 100% | 4 | 4 | 4  | 0.03% | 17.40% |
| FTC133-p16 | (P42167) Lamina-associated polypeptide 2, isoforms beta/gamma (Thymopoietin, isoforms beta/gamma) (TP beta/gamma) (Thymopoietin-related peptide isoforms beta/gamma) (TPRP isoforms beta/gamma) [Contains: Thymopoietin (TP) (Splenin); Thymopenti | LAP2B_HUMAN | 50522 | 100% | 4 | 4 | 7  | 0.06% | 16.10% |
| FTC133-p16 | (P42167) Lamina-associated polypeptide 2, isoforms beta/gamma (Thymopoietin, isoforms beta/gamma) (TP beta/gamma) (Thymopoietin-related peptide isoforms beta/gamma) (TPRP isoforms beta/gamma) [Contains: Thymopoietin (TP) (Splenin); Thymopenti | LAP2B_HUMAN | 50522 | 100% | 2 | 2 | 3  | 0.03% | 10.80% |
| FTC133-p16 | (P42167) Lamina-associated polypeptide 2, isoforms beta/gamma (Thymopoietin, isoforms beta/gamma) (TP beta/gamma) (Thymopoietin-related peptide isoforms beta/gamma) (TPRP isoforms beta/gamma) [Contains: Thymopoietin (TP) (Splenin); Thymopenti | LAP2B_HUMAN | 50522 | 100% | 2 | 2 | 3  | 0.03% | 10.80% |
| FTC133-p16 | (P42167) Lamina-associated polypeptide 2, isoforms beta/gamma (Thymopoietin, isoforms beta/gamma) (TP beta/gamma) (Thymopoietin-related peptide isoforms beta/gamma) (TPRP isoforms beta/gamma) [Contains: Thymopoietin (TP) (Splenin); Thymopenti | LAP2B_HUMAN | 50522 | 100% | 7 | 8 | 14 | 0.13% | 26.30% |

## Protein Identified Sequence Coverage in FTC-133

|            |                                                                                                                                                                                                                                                    |             |       |      |   |    |    |       |        |
|------------|----------------------------------------------------------------------------------------------------------------------------------------------------------------------------------------------------------------------------------------------------|-------------|-------|------|---|----|----|-------|--------|
| FTC133-p16 | (P42167) Lamina-associated polypeptide 2, isoforms beta/gamma (Thymopoietin, isoforms beta/gamma) (TP beta/gamma) (Thymopoietin-related peptide isoforms beta/gamma) (TPRP isoforms beta/gamma) [Contains: Thymopoietin (TP) (Splenin); Thymopenti | LAP2B_HUMAN | 50522 | 100% | 7 | 9  | 12 | 0.13% | 26.30% |
| FTC133-p16 | (P42167) Lamina-associated polypeptide 2, isoforms beta/gamma (Thymopoietin, isoforms beta/gamma) (TP beta/gamma) (Thymopoietin-related peptide isoforms beta/gamma) (TPRP isoforms beta/gamma) [Contains: Thymopoietin (TP) (Splenin); Thymopenti | LAP2B_HUMAN | 50522 | 100% | 3 | 5  | 6  | 0.07% | 11.30% |
| FTC133-p16 | (P42167) Lamina-associated polypeptide 2, isoforms beta/gamma (Thymopoietin, isoforms beta/gamma) (TP beta/gamma) (Thymopoietin-related peptide isoforms beta/gamma) (TPRP isoforms beta/gamma) [Contains: Thymopoietin (TP) (Splenin); Thymopenti | LAP2B_HUMAN | 50522 | 100% | 2 | 3  | 4  | 0.05% | 6.18%  |
| FTC133-p16 | (P42167) Lamina-associated polypeptide 2, isoforms beta/gamma (Thymopoietin, isoforms beta/gamma) (TP beta/gamma) (Thymopoietin-related peptide isoforms beta/gamma) (TPRP isoforms beta/gamma) [Contains: Thymopoietin (TP) (Splenin); Thymopenti | LAP2B_HUMAN | 50522 | 100% | 2 | 2  | 6  | 0.09% | 11.30% |
| FTC133-p16 | (P42167) Lamina-associated polypeptide 2, isoforms beta/gamma (Thymopoietin, isoforms beta/gamma) (TP beta/gamma) (Thymopoietin-related peptide isoforms beta/gamma) (TPRP isoforms beta/gamma) [Contains: Thymopoietin (TP) (Splenin); Thymopenti | LAP2B_HUMAN | 50522 | 100% | 8 | 10 | 20 | 0.18% | 28.90% |
| FTC133-p16 | (P42785) Lysosomal Pro-X carboxypeptidase precursor (EC 3.4.16.2) (Prolylcarboxypeptidase) (PRCP) (Proline carboxypeptidase) (Angiotensinase C) (Lysosomal carboxypeptidase C)                                                                     | PCP_HUMAN   | 55783 | 100% | 2 | 3  | 5  | 0.04% | 8.06%  |
| FTC133-p16 | (P42892) Endothelin-converting enzyme 1 (EC 3.4.24.71) (ECE-1)                                                                                                                                                                                     | ECE1_HUMAN  | 87147 | 100% | 4 | 5  | 9  | 0.09% | 8.70%  |
| FTC133-p16 | (P42892) Endothelin-converting enzyme 1 (EC 3.4.24.71) (ECE-1)                                                                                                                                                                                     | ECE1_HUMAN  | 87147 | 100% | 2 | 2  | 3  | 0.03% | 4.03%  |
| FTC133-p16 | (P42892) Endothelin-converting enzyme 1 (EC 3.4.24.71) (ECE-1)                                                                                                                                                                                     | ECE1_HUMAN  | 87147 | 100% | 2 | 2  | 3  | 0.03% | 3.51%  |
| FTC133-p16 | (P42892) Endothelin-converting enzyme 1 (EC 3.4.24.71) (ECE-1)                                                                                                                                                                                     | ECE1_HUMAN  | 87147 | 100% | 3 | 4  | 4  | 0.03% | 6.75%  |
| FTC133-p16 | (P42892) Endothelin-converting enzyme 1 (EC 3.4.24.71) (ECE-1)                                                                                                                                                                                     | ECE1_HUMAN  | 87147 | 100% | 3 | 5  | 11 | 0.10% | 8.70%  |
| FTC133-p16 | (P42892) Endothelin-converting enzyme 1 (EC 3.4.24.71) (ECE-1)                                                                                                                                                                                     | ECE1_HUMAN  | 87147 | 100% | 3 | 4  | 4  | 0.03% | 9.35%  |
| FTC133-p16 | (P42892) Endothelin-converting enzyme 1 (EC 3.4.24.71) (ECE-1)                                                                                                                                                                                     | ECE1_HUMAN  | 87147 | 100% | 4 | 4  | 5  | 0.05% | 8.96%  |
| FTC133-p16 | (P42892) Endothelin-converting enzyme 1 (EC 3.4.24.71) (ECE-1)                                                                                                                                                                                     | ECE1_HUMAN  | 87147 | 100% | 3 | 3  | 4  | 0.04% | 6.75%  |
| FTC133-p16 | (P42892) Endothelin-converting enzyme 1 (EC 3.4.24.71) (ECE-1)                                                                                                                                                                                     | ECE1_HUMAN  | 87147 | 100% | 2 | 2  | 3  | 0.04% | 4.16%  |
| FTC133-p16 | (P42892) Endothelin-converting enzyme 1 (EC 3.4.24.71) (ECE-1)                                                                                                                                                                                     | ECE1_HUMAN  | 87147 | 100% | 2 | 2  | 3  | 0.04% | 4.16%  |
| FTC133-p16 | (P42892) Endothelin-converting enzyme 1 (EC 3.4.24.71) (ECE-1)                                                                                                                                                                                     | ECE1_HUMAN  | 87147 | 100% | 3 | 3  | 5  | 0.07% | 7.27%  |

Protein Identified Sequence Coverage in FTC-133

|            |                                                                                                                                                                                                                                                    |             |       |      |    |    |    |       |        |
|------------|----------------------------------------------------------------------------------------------------------------------------------------------------------------------------------------------------------------------------------------------------|-------------|-------|------|----|----|----|-------|--------|
| FTC133-p16 | (P42892) Endothelin-converting enzyme 1 (EC 3.4.24.71) (ECE-1)                                                                                                                                                                                     | ECE1_HUMAN  | 87147 | 100% | 4  | 4  | 5  | 0.05% | 9.87%  |
| FTC133-p16 | (P43121) Cell surface glycoprotein MUC18 precursor (Melanoma-associated antigen MUC18) (Melanoma cell adhesion molecule) (Melanoma-associated antigen A32) (S-endo 1 endothelial-associated antigen) (Cell surface glycoprotein P1H12) (CD146 anti | MUC18_HUMAN | 71589 | 100% | 6  | 8  | 13 | 0.11% | 16.70% |
| FTC133-p16 | (P43121) Cell surface glycoprotein MUC18 precursor (Melanoma-associated antigen MUC18) (Melanoma cell adhesion molecule) (Melanoma-associated antigen A32) (S-endo 1 endothelial-associated antigen) (Cell surface glycoprotein P1H12) (CD146 anti | MUC18_HUMAN | 71589 | 100% | 4  | 5  | 10 | 0.08% | 14.20% |
| FTC133-p16 | (P43121) Cell surface glycoprotein MUC18 precursor (Melanoma-associated antigen MUC18) (Melanoma cell adhesion molecule) (Melanoma-associated antigen A32) (S-endo 1 endothelial-associated antigen) (Cell surface glycoprotein P1H12) (CD146 anti | MUC18_HUMAN | 71589 | 100% | 5  | 5  | 8  | 0.07% | 15.90% |
| FTC133-p16 | (P43121) Cell surface glycoprotein MUC18 precursor (Melanoma-associated antigen MUC18) (Melanoma cell adhesion molecule) (Melanoma-associated antigen A32) (S-endo 1 endothelial-associated antigen) (Cell surface glycoprotein P1H12) (CD146 anti | MUC18_HUMAN | 71589 | 100% | 5  | 7  | 16 | 0.14% | 16.30% |
| FTC133-p16 | (P43121) Cell surface glycoprotein MUC18 precursor (Melanoma-associated antigen MUC18) (Melanoma cell adhesion molecule) (Melanoma-associated antigen A32) (S-endo 1 endothelial-associated antigen) (Cell surface glycoprotein P1H12) (CD146 anti | MUC18_HUMAN | 71589 | 100% | 2  | 2  | 10 | 0.09% | 8.05%  |
| FTC133-p16 | (P43121) Cell surface glycoprotein MUC18 precursor (Melanoma-associated antigen MUC18) (Melanoma cell adhesion molecule) (Melanoma-associated antigen A32) (S-endo 1 endothelial-associated antigen) (Cell surface glycoprotein P1H12) (CD146 anti | MUC18_HUMAN | 71589 | 100% | 14 | 18 | 27 | 0.25% | 35.10% |
| FTC133-p16 | (P43121) Cell surface glycoprotein MUC18 precursor (Melanoma-associated antigen MUC18) (Melanoma cell adhesion molecule) (Melanoma-associated antigen A32) (S-endo 1 endothelial-associated antigen) (Cell surface glycoprotein P1H12) (CD146 anti | MUC18_HUMAN | 71589 | 100% | 12 | 15 | 22 | 0.25% | 30.50% |
| FTC133-p16 | (P43121) Cell surface glycoprotein MUC18 precursor (Melanoma-associated antigen MUC18) (Melanoma cell adhesion molecule) (Melanoma-associated antigen A32) (S-endo 1 endothelial-associated antigen) (Cell surface glycoprotein P1H12) (CD146 anti | MUC18_HUMAN | 71589 | 100% | 12 | 14 | 25 | 0.29% | 30.20% |
| FTC133-p16 | (P43121) Cell surface glycoprotein MUC18 precursor (Melanoma-associated antigen MUC18) (Melanoma cell adhesion molecule) (Melanoma-associated antigen A32) (S-endo 1 endothelial-associated antigen) (Cell surface glycoprotein P1H12) (CD146 anti | MUC18_HUMAN | 71589 | 100% | 7  | 7  | 9  | 0.11% | 18.00% |

## Protein Identified Sequence Coverage in FTC-133

|            |                                                                                                                                                                                                                                                    |             |       |      |    |    |    |       |        |
|------------|----------------------------------------------------------------------------------------------------------------------------------------------------------------------------------------------------------------------------------------------------|-------------|-------|------|----|----|----|-------|--------|
| FTC133-p16 | (P43121) Cell surface glycoprotein MUC18 precursor (Melanoma-associated antigen MUC18) (Melanoma cell adhesion molecule) (Melanoma-associated antigen A32) (S-endo 1 endothelial-associated antigen) (Cell surface glycoprotein P1H12) (CD146 anti | MUC18_HUMAN | 71589 | 100% | 4  | 4  | 10 | 0.14% | 13.60% |
| FTC133-p16 | (P43121) Cell surface glycoprotein MUC18 precursor (Melanoma-associated antigen MUC18) (Melanoma cell adhesion molecule) (Melanoma-associated antigen A32) (S-endo 1 endothelial-associated antigen) (Cell surface glycoprotein P1H12) (CD146 anti | MUC18_HUMAN | 71589 | 100% | 11 | 12 | 22 | 0.20% | 27.90% |
| FTC133-p16 | (P43307) Translocon-associated protein alpha subunit precursor (TRAP-alpha) (Signal sequence receptor alpha subunit) (SSR-alpha)                                                                                                                   | SSRA_HUMAN  | 32218 | 100% | 2  | 3  | 5  | 0.04% | 8.04%  |
| FTC133-p16 | (P43307) Translocon-associated protein alpha subunit precursor (TRAP-alpha) (Signal sequence receptor alpha subunit) (SSR-alpha)                                                                                                                   | SSRA_HUMAN  | 32218 | 100% | 2  | 2  | 2  | 0.02% | 8.04%  |
| FTC133-p16 | (P43490) Nicotinamide phosphoribosyltransferase (EC 2.4.2.12) (NAMPRTase) (Nampt) (Pre-B cell-enhancing factor) (Pre-B-cell colony-enhancing factor 1) (Visfatin)                                                                                  | NAMPT_HUMAN | 55505 | 100% | 2  | 3  | 4  | 0.03% | 7.13%  |
| FTC133-p16 | (P43490) Nicotinamide phosphoribosyltransferase (EC 2.4.2.12) (NAMPRTase) (Nampt) (Pre-B cell-enhancing factor) (Pre-B-cell colony-enhancing factor 1) (Visfatin)                                                                                  | NAMPT_HUMAN | 55505 | 100% | 6  | 7  | 14 | 0.12% | 17.50% |
| FTC133-p16 | (P43490) Nicotinamide phosphoribosyltransferase (EC 2.4.2.12) (NAMPRTase) (Nampt) (Pre-B cell-enhancing factor) (Pre-B-cell colony-enhancing factor 1) (Visfatin)                                                                                  | NAMPT_HUMAN | 55505 | 100% | 2  | 3  | 5  | 0.04% | 9.78%  |
| FTC133-p16 | (P43490) Nicotinamide phosphoribosyltransferase (EC 2.4.2.12) (NAMPRTase) (Nampt) (Pre-B cell-enhancing factor) (Pre-B-cell colony-enhancing factor 1) (Visfatin)                                                                                  | NAMPT_HUMAN | 55505 | 100% | 5  | 8  | 18 | 0.15% | 22.60% |
| FTC133-p16 | (P43490) Nicotinamide phosphoribosyltransferase (EC 2.4.2.12) (NAMPRTase) (Nampt) (Pre-B cell-enhancing factor) (Pre-B-cell colony-enhancing factor 1) (Visfatin)                                                                                  | NAMPT_HUMAN | 55505 | 100% | 2  | 2  | 2  | 0.02% | 5.70%  |
| FTC133-p16 | (P43490) Nicotinamide phosphoribosyltransferase (EC 2.4.2.12) (NAMPRTase) (Nampt) (Pre-B cell-enhancing factor) (Pre-B-cell colony-enhancing factor 1) (Visfatin)                                                                                  | NAMPT_HUMAN | 55505 | 100% | 9  | 10 | 18 | 0.17% | 30.80% |
| FTC133-p16 | (P43490) Nicotinamide phosphoribosyltransferase (EC 2.4.2.12) (NAMPRTase) (Nampt) (Pre-B cell-enhancing factor) (Pre-B-cell colony-enhancing factor 1) (Visfatin)                                                                                  | NAMPT_HUMAN | 55505 | 100% | 8  | 10 | 13 | 0.15% | 25.50% |

## Protein Identified Sequence Coverage in FTC-133

|            |                                                                                                                                                                   |             |        |      |   |    |    |       |        |
|------------|-------------------------------------------------------------------------------------------------------------------------------------------------------------------|-------------|--------|------|---|----|----|-------|--------|
| FTC133-p16 | (P43490) Nicotinamide phosphoribosyltransferase (EC 2.4.2.12) (NAMPRtase) (Nampt) (Pre-B cell-enhancing factor) (Pre-B-cell colony-enhancing factor 1) (Visfatin) | NAMPT_HUMAN | 55505  | 100% | 8 | 8  | 11 | 0.13% | 25.30% |
| FTC133-p16 | (P43490) Nicotinamide phosphoribosyltransferase (EC 2.4.2.12) (NAMPRtase) (Nampt) (Pre-B cell-enhancing factor) (Pre-B-cell colony-enhancing factor 1) (Visfatin) | NAMPT_HUMAN | 55505  | 100% | 8 | 8  | 9  | 0.11% | 24.80% |
| FTC133-p16 | (P43490) Nicotinamide phosphoribosyltransferase (EC 2.4.2.12) (NAMPRtase) (Nampt) (Pre-B cell-enhancing factor) (Pre-B-cell colony-enhancing factor 1) (Visfatin) | NAMPT_HUMAN | 55505  | 100% | 3 | 3  | 7  | 0.10% | 12.60% |
| FTC133-p16 | (P43490) Nicotinamide phosphoribosyltransferase (EC 2.4.2.12) (NAMPRtase) (Nampt) (Pre-B cell-enhancing factor) (Pre-B-cell colony-enhancing factor 1) (Visfatin) | NAMPT_HUMAN | 55505  | 100% | 9 | 12 | 18 | 0.17% | 29.50% |
| FTC133-p16 | (P45880) Voltage-dependent anion-selective channel protein 2 (VDAC-2) (hVDAC2) (Outer mitochondrial membrane protein porin 2)                                     | VDAC2_HUMAN | 38076  | 100% | 2 | 2  | 2  | 0.02% | 10.40% |
| FTC133-p16 | (P45880) Voltage-dependent anion-selective channel protein 2 (VDAC-2) (hVDAC2) (Outer mitochondrial membrane protein porin 2)                                     | VDAC2_HUMAN | 38076  | 100% | 2 | 2  | 3  | 0.04% | 12.40% |
| FTC133-p16 | (P45880) Voltage-dependent anion-selective channel protein 2 (VDAC-2) (hVDAC2) (Outer mitochondrial membrane protein porin 2)                                     | VDAC2_HUMAN | 38076  | 100% | 2 | 2  | 2  | 0.02% | 6.34%  |
| FTC133-p16 | (P46782) 40S ribosomal protein S5                                                                                                                                 | RS5_HUMAN   | 22728  | 100% | 2 | 2  | 3  | 0.03% | 11.80% |
| FTC133-p16 | (P46782) 40S ribosomal protein S5                                                                                                                                 | RS5_HUMAN   | 22728  | 100% | 2 | 2  | 3  | 0.03% | 13.80% |
| FTC133-p16 | (P46821) Microtubule-associated protein 1B (MAP1B) [Contains: MAP1 light chain LC1]                                                                               | MAP1B_HUMAN | 270602 | 100% | 2 | 2  | 5  | 0.04% | 1.18%  |
| FTC133-p16 | (P46821) Microtubule-associated protein 1B (MAP1B) [Contains: MAP1 light chain LC1]                                                                               | MAP1B_HUMAN | 270602 | 100% | 2 | 2  | 3  | 0.03% | 1.46%  |
| FTC133-p16 | (P46821) Microtubule-associated protein 1B (MAP1B) [Contains: MAP1 light chain LC1]                                                                               | MAP1B_HUMAN | 270602 | 100% | 2 | 2  | 2  | 0.02% | 1.18%  |
| FTC133-p16 | (P46976) Glycogenin-1 (EC 2.4.1.186)                                                                                                                              | GLYG_HUMAN  | 39235  | 100% | 2 | 2  | 3  | 0.03% | 5.73%  |
| FTC133-p16 | (P46976) Glycogenin-1 (EC 2.4.1.186)                                                                                                                              | GLYG_HUMAN  | 39235  | 100% | 2 | 2  | 4  | 0.04% | 6.88%  |
| FTC133-p16 | (P47755) F-actin capping protein alpha-2 subunit (CapZ alpha-2)                                                                                                   | CAZA2_HUMAN | 32800  | 100% | 2 | 2  | 2  | 0.02% | 14.70% |
| FTC133-p16 | (P47755) F-actin capping protein alpha-2 subunit (CapZ alpha-2)                                                                                                   | CAZA2_HUMAN | 32800  | 100% | 2 | 2  | 2  | 0.02% | 9.82%  |
| FTC133-p16 | (P47755) F-actin capping protein alpha-2 subunit (CapZ alpha-2)                                                                                                   | CAZA2_HUMAN | 32800  | 100% | 2 | 2  | 2  | 0.03% | 13.00% |
| FTC133-p16 | (P48643) T-complex protein 1 subunit epsilon (TCP-1-epsilon) (CCT-epsilon)                                                                                        | TCPE_HUMAN  | 59654  | 100% | 3 | 3  | 9  | 0.08% | 13.90% |
| FTC133-p16 | (P48643) T-complex protein 1 subunit epsilon (TCP-1-epsilon) (CCT-epsilon)                                                                                        | TCPE_HUMAN  | 59654  | 100% | 4 | 5  | 7  | 0.06% | 15.30% |
| FTC133-p16 | (P48643) T-complex protein 1 subunit epsilon (TCP-1-epsilon) (CCT-epsilon)                                                                                        | TCPE_HUMAN  | 59654  | 100% | 2 | 2  | 2  | 0.02% | 9.24%  |
| FTC133-p16 | (P48643) T-complex protein 1 subunit epsilon (TCP-1-epsilon) (CCT-epsilon)                                                                                        | TCPE_HUMAN  | 59654  | 100% | 2 | 2  | 2  | 0.02% | 6.10%  |
| FTC133-p16 | (P48643) T-complex protein 1 subunit epsilon (TCP-1-epsilon) (CCT-epsilon)                                                                                        | TCPE_HUMAN  | 59654  | 100% | 2 | 2  | 2  | 0.02% | 6.65%  |
| FTC133-p16 | (P48643) T-complex protein 1 subunit epsilon (TCP-1-epsilon) (CCT-epsilon)                                                                                        | TCPE_HUMAN  | 59654  | 100% | 2 | 2  | 3  | 0.04% | 6.10%  |

## Protein Identified Sequence Coverage in FTC-133

|            |                                                                                                                                                                                         |             |       |      |   |    |    |       |        |
|------------|-----------------------------------------------------------------------------------------------------------------------------------------------------------------------------------------|-------------|-------|------|---|----|----|-------|--------|
| FTC133-p16 | (P48643) T-complex protein 1 subunit epsilon (TCP-1-epsilon) (CCT-epsilon)                                                                                                              | TCPE_HUMAN  | 59654 | 100% | 3 | 3  | 4  | 0.04% | 9.80%  |
| FTC133-p16 | (P48960) CD97 antigen precursor (Leukocyte antigen CD97)                                                                                                                                | CD97_HUMAN  | 91852 | 100% | 2 | 2  | 2  | 0.02% | 3.95%  |
| FTC133-p16 | (P49321) Nuclear autoantigenic sperm protein (NASP)                                                                                                                                     | NASP_HUMAN  | 85218 | 100% | 2 | 2  | 3  | 0.03% | 6.47%  |
| FTC133-p16 | (P49366) Deoxyhypusine synthase (EC 2.5.1.46) (DHS)                                                                                                                                     | DHYS_HUMAN  | 40953 | 100% | 3 | 4  | 14 | 0.12% | 13.80% |
| FTC133-p16 | (P49366) Deoxyhypusine synthase (EC 2.5.1.46) (DHS)                                                                                                                                     | DHYS_HUMAN  | 40953 | 100% | 2 | 2  | 2  | 0.02% | 14.10% |
| FTC133-p16 | (P49366) Deoxyhypusine synthase (EC 2.5.1.46) (DHS)                                                                                                                                     | DHYS_HUMAN  | 40953 | 100% | 3 | 4  | 6  | 0.06% | 14.10% |
| FTC133-p16 | (P49366) Deoxyhypusine synthase (EC 2.5.1.46) (DHS)                                                                                                                                     | DHYS_HUMAN  | 40953 | 100% | 5 | 6  | 7  | 0.08% | 18.70% |
| FTC133-p16 | (P49366) Deoxyhypusine synthase (EC 2.5.1.46) (DHS)                                                                                                                                     | DHYS_HUMAN  | 40953 | 100% | 3 | 3  | 4  | 0.05% | 12.20% |
| FTC133-p16 | (P49366) Deoxyhypusine synthase (EC 2.5.1.46) (DHS)                                                                                                                                     | DHYS_HUMAN  | 40953 | 100% | 3 | 3  | 5  | 0.06% | 11.70% |
| FTC133-p16 | (P49366) Deoxyhypusine synthase (EC 2.5.1.46) (DHS)                                                                                                                                     | DHYS_HUMAN  | 40953 | 100% | 2 | 2  | 2  | 0.02% | 8.94%  |
| FTC133-p16 | (P49419) Aldehyde dehydrogenase family 7 member A1 (EC 1.2.1.3) (Antiquitin-1)                                                                                                          | AL7A1_HUMAN | 55217 | 100% | 2 | 3  | 3  | 0.03% | 6.08%  |
| FTC133-p16 | (P49419) Aldehyde dehydrogenase family 7 member A1 (EC 1.2.1.3) (Antiquitin-1)                                                                                                          | AL7A1_HUMAN | 55217 | 100% | 2 | 2  | 2  | 0.02% | 7.84%  |
| FTC133-p16 | (P49419) Aldehyde dehydrogenase family 7 member A1 (EC 1.2.1.3) (Antiquitin-1)                                                                                                          | AL7A1_HUMAN | 55217 | 100% | 2 | 2  | 2  | 0.02% | 5.49%  |
| FTC133-p16 | (P49755) Transmembrane emp24 domain-containing protein 10 precursor (Transmembrane protein Tmp21) (21 kDa transmembrane trafficking protein) (p24delta) (S3111125) (S311125) (Tmp-21-I) | TMEDA_HUMAN | 24960 | 100% | 2 | 3  | 3  | 0.03% | 16.90% |
| FTC133-p16 | (P50395) Rab GDP dissociation inhibitor beta (Rab GDI beta) (Guanosine diphosphate dissociation inhibitor 2) (GDI-2)                                                                    | GDIB_HUMAN  | 50648 | 100% | 2 | 2  | 2  | 0.02% | 9.66%  |
| FTC133-p16 | (P50454) Collagen-binding protein 2 precursor (Colligin 2) (Rheumatoid arthritis-related antigen RA-A47) (SerpH2)                                                                       | SPH2_HUMAN  | 46424 | 100% | 2 | 3  | 9  | 0.08% | 9.09%  |
| FTC133-p16 | (P50454) Collagen-binding protein 2 precursor (Colligin 2) (Rheumatoid arthritis-related antigen RA-A47) (SerpH2)                                                                       | SPH2_HUMAN  | 46424 | 100% | 2 | 3  | 3  | 0.03% | 8.37%  |
| FTC133-p16 | (P50454) Collagen-binding protein 2 precursor (Colligin 2) (Rheumatoid arthritis-related antigen RA-A47) (SerpH2)                                                                       | SPH2_HUMAN  | 46424 | 100% | 2 | 3  | 16 | 0.14% | 9.81%  |
| FTC133-p16 | (P50454) Collagen-binding protein 2 precursor (Colligin 2) (Rheumatoid arthritis-related antigen RA-A47) (SerpH2)                                                                       | SPH2_HUMAN  | 46424 | 100% | 2 | 2  | 3  | 0.03% | 11.70% |
| FTC133-p16 | (P50454) Collagen-binding protein 2 precursor (Colligin 2) (Rheumatoid arthritis-related antigen RA-A47) (SerpH2)                                                                       | SPH2_HUMAN  | 46424 | 100% | 8 | 10 | 15 | 0.14% | 27.00% |
| FTC133-p16 | (P50454) Collagen-binding protein 2 precursor (Colligin 2) (Rheumatoid arthritis-related antigen RA-A47) (SerpH2)                                                                       | SPH2_HUMAN  | 46424 | 100% | 8 | 9  | 10 | 0.11% | 27.50% |
| FTC133-p16 | (P50454) Collagen-binding protein 2 precursor (Colligin 2) (Rheumatoid arthritis-related antigen RA-A47) (SerpH2)                                                                       | SPH2_HUMAN  | 46424 | 100% | 6 | 7  | 9  | 0.11% | 23.90% |



## Protein Identified Sequence Coverage in FTC-133

|            |                                                                                                                                                                                           |             |       |      |   |   |    |       |        |
|------------|-------------------------------------------------------------------------------------------------------------------------------------------------------------------------------------------|-------------|-------|------|---|---|----|-------|--------|
| FTC133-p16 | (P50454) Collagen-binding protein 2 precursor (Colligin 2) (Rheumatoid arthritis-related antigen RA-A47) (Serpin H2)                                                                      | SPH2_HUMAN  | 46424 | 100% | 6 | 6 | 7  | 0.08% | 17.90% |
| FTC133-p16 | (P50454) Collagen-binding protein 2 precursor (Colligin 2) (Rheumatoid arthritis-related antigen RA-A47) (Serpin H2)                                                                      | SPH2_HUMAN  | 46424 | 100% | 4 | 4 | 6  | 0.09% | 21.10% |
| FTC133-p16 | (P50454) Collagen-binding protein 2 precursor (Colligin 2) (Rheumatoid arthritis-related antigen RA-A47) (Serpin H2)                                                                      | SPH2_HUMAN  | 46424 | 100% | 8 | 9 | 13 | 0.12% | 27.80% |
| FTC133-p16 | (P50897) Palmitoyl-protein thioesterase 1 precursor (EC 3.1.2.22) (Palmitoyl-protein hydrolase 1)                                                                                         | PPT1_HUMAN  | 34176 | 100% | 2 | 2 | 8  | 0.08% | 12.70% |
| FTC133-p16 | (P50990) T-complex protein 1 subunit theta (TCP-1-theta) (CCT-theta) (NY-REN-15 antigen)                                                                                                  | TCPQ_HUMAN  | 59472 | 100% | 2 | 2 | 4  | 0.04% | 4.94%  |
| FTC133-p16 | (P50990) T-complex protein 1 subunit theta (TCP-1-theta) (CCT-theta) (NY-REN-15 antigen)                                                                                                  | TCPQ_HUMAN  | 59472 | 100% | 2 | 2 | 3  | 0.04% | 4.75%  |
| FTC133-p16 | (P50991) T-complex protein 1 subunit delta (TCP-1-delta) (CCT-delta) (Stimulator of TAR RNA-binding)                                                                                      | TCPD_HUMAN  | 57777 | 100% | 2 | 2 | 4  | 0.04% | 5.39%  |
| FTC133-p16 | (P50991) T-complex protein 1 subunit delta (TCP-1-delta) (CCT-delta) (Stimulator of TAR RNA-binding)                                                                                      | TCPD_HUMAN  | 57777 | 100% | 2 | 2 | 2  | 0.02% | 5.39%  |
| FTC133-p16 | (P50991) T-complex protein 1 subunit delta (TCP-1-delta) (CCT-delta) (Stimulator of TAR RNA-binding)                                                                                      | TCPD_HUMAN  | 57777 | 100% | 2 | 2 | 2  | 0.02% | 5.39%  |
| FTC133-p16 | (P50991) T-complex protein 1 subunit delta (TCP-1-delta) (CCT-delta) (Stimulator of TAR RNA-binding)                                                                                      | TCPD_HUMAN  | 57777 | 100% | 3 | 3 | 4  | 0.05% | 7.99%  |
| FTC133-p16 | (P50991) T-complex protein 1 subunit delta (TCP-1-delta) (CCT-delta) (Stimulator of TAR RNA-binding)                                                                                      | TCPD_HUMAN  | 57777 | 100% | 2 | 2 | 2  | 0.02% | 5.39%  |
| FTC133-p16 | (P51665) 26S proteasome non-ATPase regulatory subunit 7 (26S proteasome regulatory subunit rpn8) (26S proteasome regulatory subunit S12) (Proteasome subunit p40) (Mov34 protein homolog) | PSD7_HUMAN  | 37008 | 100% | 2 | 2 | 3  | 0.03% | 12.70% |
| FTC133-p16 | (P51665) 26S proteasome non-ATPase regulatory subunit 7 (26S proteasome regulatory subunit rpn8) (26S proteasome regulatory subunit S12) (Proteasome subunit p40) (Mov34 protein homolog) | PSD7_HUMAN  | 37008 | 100% | 2 | 2 | 2  | 0.02% | 12.00% |
| FTC133-p16 | (P51665) 26S proteasome non-ATPase regulatory subunit 7 (26S proteasome regulatory subunit rpn8) (26S proteasome regulatory subunit S12) (Proteasome subunit p40) (Mov34 protein homolog) | PSD7_HUMAN  | 37008 | 100% | 2 | 2 | 2  | 0.02% | 12.00% |
| FTC133-p16 | (P51688) N-sulphoglucosamine sulphohydrolase precursor (EC 3.10.1.1) (Sulfoglucosamine sulfamidase) (Sulphamidase)                                                                        | SPHM_HUMAN  | 56678 | 100% | 3 | 3 | 6  | 0.06% | 11.20% |
| FTC133-p16 | (P51688) N-sulphoglucosamine sulphohydrolase precursor (EC 3.10.1.1) (Sulfoglucosamine sulfamidase) (Sulphamidase)                                                                        | SPHM_HUMAN  | 56678 | 100% | 2 | 2 | 2  | 0.02% | 4.78%  |
| FTC133-p16 | (P52272) Heterogeneous nuclear ribonucleoprotein M (hnRNP M)                                                                                                                              | HNRPM_HUMAN | 77368 | 100% | 5 | 5 | 14 | 0.12% | 10.70% |
| FTC133-p16 | (P52272) Heterogeneous nuclear ribonucleoprotein M (hnRNP M)                                                                                                                              | HNRPM_HUMAN | 77368 | 100% | 2 | 2 | 4  | 0.03% | 5.21%  |

## Protein Identified Sequence Coverage in FTC-133

|            |                                                                                                                                          |             |       |      |   |   |    |       |        |
|------------|------------------------------------------------------------------------------------------------------------------------------------------|-------------|-------|------|---|---|----|-------|--------|
| FTC133-p16 | (P52272) Heterogeneous nuclear ribonucleoprotein M (hnRNP M)                                                                             | HNRPM_HUMAN | 77368 | 100% | 4 | 4 | 8  | 0.07% | 7.68%  |
| FTC133-p16 | (P52272) Heterogeneous nuclear ribonucleoprotein M (hnRNP M)                                                                             | HNRPM_HUMAN | 77368 | 100% | 3 | 3 | 3  | 0.03% | 6.86%  |
| FTC133-p16 | (P52272) Heterogeneous nuclear ribonucleoprotein M (hnRNP M)                                                                             | HNRPM_HUMAN | 77368 | 100% | 5 | 5 | 7  | 0.08% | 11.00% |
| FTC133-p16 | (P52272) Heterogeneous nuclear ribonucleoprotein M (hnRNP M)                                                                             | HNRPM_HUMAN | 77368 | 100% | 5 | 5 | 8  | 0.09% | 9.19%  |
| FTC133-p16 | (P52272) Heterogeneous nuclear ribonucleoprotein M (hnRNP M)                                                                             | HNRPM_HUMAN | 77368 | 100% | 6 | 6 | 7  | 0.06% | 12.30% |
| FTC133-p16 | (P52565) Rho GDP-dissociation inhibitor 1 (Rho GDI 1) (Rho-GDI alpha)                                                                    | GDIR_HUMAN  | 23058 | 100% | 4 | 4 | 4  | 0.04% | 15.30% |
| FTC133-p16 | (P52565) Rho GDP-dissociation inhibitor 1 (Rho GDI 1) (Rho-GDI alpha)                                                                    | GDIR_HUMAN  | 23058 | 100% | 2 | 2 | 2  | 0.02% | 15.30% |
| FTC133-p16 | (P52799) Ephrin-B2 precursor (EPH-related receptor tyrosine kinase ligand 5) (LERK-5) (HTK ligand) (HTK-L)                               | EFNB2_HUMAN | 36906 | 100% | 2 | 2 | 2  | 0.02% | 9.31%  |
| FTC133-p16 | (P52815) 39S ribosomal protein L12, mitochondrial precursor (L12mt) (MRP-L12) (5c5-2)                                                    | RM12_HUMAN  | 21330 | 100% | 2 | 2 | 2  | 0.02% | 23.70% |
| FTC133-p16 | (P53365) Arfaptin-2 (ADP-ribosylation factor-interacting protein 2) (Partner of RAC1) (POR1 protein)                                     | ARFP2_HUMAN | 37839 | 100% | 2 | 2 | 2  | 0.02% | 6.74%  |
| FTC133-p16 | (P53367) Arfaptin-1 (ADP-ribosylation factor-interacting protein 1)                                                                      | ARFP1_HUMAN | 41722 | 100% | 2 | 3 | 10 | 0.09% | 8.85%  |
| FTC133-p16 | (P53367) Arfaptin-1 (ADP-ribosylation factor-interacting protein 1)                                                                      | ARFP1_HUMAN | 41722 | 100% | 2 | 2 | 3  | 0.04% | 9.12%  |
| FTC133-p16 | (P54577) Tyrosyl-tRNA synthetase, cytoplasmic (EC 6.1.1.1) (Tyrosyl--tRNA ligase) (TyrRS)                                                | SYYC_HUMAN  | 58996 | 100% | 3 | 3 | 4  | 0.03% | 5.69%  |
| FTC133-p16 | (P54577) Tyrosyl-tRNA synthetase, cytoplasmic (EC 6.1.1.1) (Tyrosyl--tRNA ligase) (TyrRS)                                                | SYYC_HUMAN  | 58996 | 100% | 7 | 7 | 9  | 0.08% | 18.60% |
| FTC133-p16 | (P54577) Tyrosyl-tRNA synthetase, cytoplasmic (EC 6.1.1.1) (Tyrosyl--tRNA ligase) (TyrRS)                                                | SYYC_HUMAN  | 58996 | 100% | 5 | 5 | 6  | 0.07% | 13.10% |
| FTC133-p16 | (P54577) Tyrosyl-tRNA synthetase, cytoplasmic (EC 6.1.1.1) (Tyrosyl--tRNA ligase) (TyrRS)                                                | SYYC_HUMAN  | 58996 | 100% | 4 | 4 | 4  | 0.05% | 13.30% |
| FTC133-p16 | (P54577) Tyrosyl-tRNA synthetase, cytoplasmic (EC 6.1.1.1) (Tyrosyl--tRNA ligase) (TyrRS)                                                | SYYC_HUMAN  | 58996 | 100% | 5 | 5 | 7  | 0.06% | 12.00% |
| FTC133-p16 | (P54709) Sodium/potassium-transporting ATPase subunit beta-3 (Sodium/potassium-dependent ATPase beta-3 subunit) (ATPB-3) (CD298 antigen) | AT1B3_HUMAN | 31496 | 100% | 2 | 2 | 2  | 0.02% | 8.96%  |
| FTC133-p16 | (P54819) Adenylate kinase isoenzyme 2, mitochondrial (EC 2.7.4.3) (ATP-AMP transphosphorylase)                                           | KAD2_HUMAN  | 26330 | 100% | 2 | 4 | 6  | 0.05% | 18.10% |
| FTC133-p16 | (P55010) Eukaryotic translation initiation factor 5 (eIF-5)                                                                              | IF5_HUMAN   | 49205 | 100% | 2 | 2 | 5  | 0.04% | 6.96%  |
| FTC133-p16 | (P55145) ARMET protein precursor (Arginine-rich protein)                                                                                 | ARMET_HUMAN | 20240 | 100% | 2 | 2 | 3  | 0.03% | 16.20% |
| FTC133-p16 | (P55145) ARMET protein precursor (Arginine-rich protein)                                                                                 | ARMET_HUMAN | 20240 | 100% | 2 | 2 | 5  | 0.04% | 16.20% |
| FTC133-p16 | (P55145) ARMET protein precursor (Arginine-rich protein)                                                                                 | ARMET_HUMAN | 20240 | 100% | 4 | 4 | 6  | 0.06% | 26.80% |
| FTC133-p16 | (P55145) ARMET protein precursor (Arginine-rich protein)                                                                                 | ARMET_HUMAN | 20240 | 100% | 4 | 5 | 5  | 0.06% | 22.90% |
| FTC133-p16 | (P55145) ARMET protein precursor (Arginine-rich protein)                                                                                 | ARMET_HUMAN | 20240 | 100% | 3 | 3 | 4  | 0.05% | 15.10% |

## Protein Identified Sequence Coverage in FTC-133

|            |                                                                                                                                            |             |       |      |   |   |    |       |        |
|------------|--------------------------------------------------------------------------------------------------------------------------------------------|-------------|-------|------|---|---|----|-------|--------|
| FTC133-p16 | (P55145) ARMET protein precursor (Arginine-rich protein)                                                                                   | ARMET_HUMAN | 20240 | 100% | 2 | 2 | 3  | 0.04% | 9.50%  |
| FTC133-p16 | (P55145) ARMET protein precursor (Arginine-rich protein)                                                                                   | ARMET_HUMAN | 20240 | 100% | 3 | 3 | 3  | 0.03% | 15.10% |
| FTC133-p16 | (P55290) Cadherin-13 precursor (Truncated-cadherin) (T-cadherin) (T-cad) (Heart-cadherin) (H-cadherin) (P105)                              | CAD13_HUMAN | 78270 | 100% | 2 | 2 | 3  | 0.03% | 7.15%  |
| FTC133-p16 | (P55290) Cadherin-13 precursor (Truncated-cadherin) (T-cadherin) (T-cad) (Heart-cadherin) (H-cadherin) (P105)                              | CAD13_HUMAN | 78270 | 100% | 2 | 2 | 2  | 0.02% | 7.15%  |
| FTC133-p16 | (P55290) Cadherin-13 precursor (Truncated-cadherin) (T-cadherin) (T-cad) (Heart-cadherin) (H-cadherin) (P105)                              | CAD13_HUMAN | 78270 | 100% | 2 | 2 | 2  | 0.02% | 7.71%  |
| FTC133-p16 | (P55290) Cadherin-13 precursor (Truncated-cadherin) (T-cadherin) (T-cad) (Heart-cadherin) (H-cadherin) (P105)                              | CAD13_HUMAN | 78270 | 100% | 2 | 2 | 3  | 0.03% | 7.71%  |
| FTC133-p16 | (P55290) Cadherin-13 precursor (Truncated-cadherin) (T-cadherin) (T-cad) (Heart-cadherin) (H-cadherin) (P105)                              | CAD13_HUMAN | 78270 | 100% | 2 | 2 | 2  | 0.02% | 7.71%  |
| FTC133-p16 | (P55327) Tumor protein D52 (N8 protein)                                                                                                    | TPD52_HUMAN | 19845 | 100% | 2 | 3 | 6  | 0.05% | 15.80% |
| FTC133-p16 | (P55327) Tumor protein D52 (N8 protein)                                                                                                    | TPD52_HUMAN | 19845 | 100% | 3 | 3 | 13 | 0.11% | 32.60% |
| FTC133-p16 | (P55327) Tumor protein D52 (N8 protein)                                                                                                    | TPD52_HUMAN | 19845 | 100% | 4 | 5 | 30 | 0.26% | 47.30% |
| FTC133-p16 | (P55327) Tumor protein D52 (N8 protein)                                                                                                    | TPD52_HUMAN | 19845 | 100% | 2 | 3 | 10 | 0.09% | 27.20% |
| FTC133-p16 | (P55327) Tumor protein D52 (N8 protein)                                                                                                    | TPD52_HUMAN | 19845 | 100% | 4 | 5 | 11 | 0.10% | 50.00% |
| FTC133-p16 | (P55327) Tumor protein D52 (N8 protein)                                                                                                    | TPD52_HUMAN | 19845 | 100% | 4 | 6 | 12 | 0.13% | 44.60% |
| FTC133-p16 | (P55327) Tumor protein D52 (N8 protein)                                                                                                    | TPD52_HUMAN | 19845 | 100% | 5 | 7 | 13 | 0.15% | 50.00% |
| FTC133-p16 | (P55327) Tumor protein D52 (N8 protein)                                                                                                    | TPD52_HUMAN | 19845 | 100% | 3 | 4 | 8  | 0.09% | 15.80% |
| FTC133-p16 | (P55327) Tumor protein D52 (N8 protein)                                                                                                    | TPD52_HUMAN | 19845 | 100% | 2 | 2 | 5  | 0.07% | 27.20% |
| FTC133-p16 | (P55327) Tumor protein D52 (N8 protein)                                                                                                    | TPD52_HUMAN | 19845 | 100% | 4 | 6 | 11 | 0.10% | 44.60% |
| FTC133-p16 | (P55769) NHP2-like protein 1 (High mobility group-like nuclear protein 2 homolog 1) (U4/U6.U5 tri-snRNP 15.5 kDa protein) (OTK27) (hSNU13) | NHPX_HUMAN  | 14025 | 100% | 2 | 2 | 3  | 0.03% | 31.50% |
| FTC133-p16 | (P56134) ATP synthase f chain, mitochondrial (EC 3.6.3.14)                                                                                 | ATPK_HUMAN  | 10769 | 100% | 2 | 2 | 2  | 0.02% | 25.80% |
| FTC133-p16 | (P56134) ATP synthase f chain, mitochondrial (EC 3.6.3.14)                                                                                 | ATPK_HUMAN  | 10769 | 100% | 2 | 2 | 2  | 0.02% | 25.80% |
| FTC133-p16 | (P60174) Triosephosphate isomerase (EC 5.3.1.1) (TIM) (Triose-phosphate isomerase)                                                         | TPIS_HUMAN  | 26520 | 100% | 3 | 3 | 5  | 0.04% | 16.90% |
| FTC133-p16 | (P60174) Triosephosphate isomerase (EC 5.3.1.1) (TIM) (Triose-phosphate isomerase)                                                         | TPIS_HUMAN  | 26520 | 100% | 2 | 3 | 3  | 0.03% | 14.10% |
| FTC133-p16 | (P60174) Triosephosphate isomerase (EC 5.3.1.1) (TIM) (Triose-phosphate isomerase)                                                         | TPIS_HUMAN  | 26520 | 100% | 2 | 4 | 45 | 0.38% | 19.00% |
| FTC133-p16 | (P60174) Triosephosphate isomerase (EC 5.3.1.1) (TIM) (Triose-phosphate isomerase)                                                         | TPIS_HUMAN  | 26520 | 100% | 2 | 3 | 5  | 0.04% | 19.00% |
| FTC133-p16 | (P60174) Triosephosphate isomerase (EC 5.3.1.1) (TIM) (Triose-phosphate isomerase)                                                         | TPIS_HUMAN  | 26520 | 100% | 7 | 8 | 13 | 0.12% | 43.10% |
| FTC133-p16 | (P60174) Triosephosphate isomerase (EC 5.3.1.1) (TIM) (Triose-phosphate isomerase)                                                         | TPIS_HUMAN  | 26520 | 100% | 7 | 8 | 14 | 0.16% | 43.50% |
| FTC133-p16 | (P60174) Triosephosphate isomerase (EC 5.3.1.1) (TIM) (Triose-phosphate isomerase)                                                         | TPIS_HUMAN  | 26520 | 100% | 5 | 6 | 9  | 0.11% | 28.60% |
| FTC133-p16 | (P60174) Triosephosphate isomerase (EC 5.3.1.1) (TIM) (Triose-phosphate isomerase)                                                         | TPIS_HUMAN  | 26520 | 100% | 4 | 4 | 6  | 0.07% | 19.40% |
| FTC133-p16 | (P60174) Triosephosphate isomerase (EC 5.3.1.1) (TIM) (Triose-phosphate isomerase)                                                         | TPIS_HUMAN  | 26520 | 100% | 8 | 8 | 16 | 0.15% | 47.60% |

## Protein Identified Sequence Coverage in FTC-133

|            |                                                                                                                                                                                                                                         |             |       |      |   |   |   |       |        |
|------------|-----------------------------------------------------------------------------------------------------------------------------------------------------------------------------------------------------------------------------------------|-------------|-------|------|---|---|---|-------|--------|
| FTC133-p16 | (P60660) Myosin light polypeptide 6 (Smooth muscle and nonmuscle myosin light chain alkali 6) (Myosin light chain alkali 3) (Myosin light chain 3) (MLC-3) (LC17)                                                                       | MYL6_HUMAN  | 16781 | 100% | 3 | 3 | 4 | 0.04% | 25.30% |
| FTC133-p16 | (P61289) Proteasome activator complex subunit 3 (Proteasome activator 28-gamma subunit) (PA28gamma) (PA28g) (Activator of multicatalytic protease subunit 3) (11S regulator complex gamma subunit) (REG-gamma) (Ki nuclear autoantigen) | PSME3_HUMAN | 29489 | 100% | 4 | 5 | 7 | 0.06% | 21.30% |
| FTC133-p16 | (P61289) Proteasome activator complex subunit 3 (Proteasome activator 28-gamma subunit) (PA28gamma) (PA28g) (Activator of multicatalytic protease subunit 3) (11S regulator complex gamma subunit) (REG-gamma) (Ki nuclear autoantigen) | PSME3_HUMAN | 29489 | 100% | 4 | 4 | 7 | 0.08% | 19.70% |
| FTC133-p16 | (P61289) Proteasome activator complex subunit 3 (Proteasome activator 28-gamma subunit) (PA28gamma) (PA28g) (Activator of multicatalytic protease subunit 3) (11S regulator complex gamma subunit) (REG-gamma) (Ki nuclear autoantigen) | PSME3_HUMAN | 29489 | 100% | 4 | 5 | 5 | 0.06% | 19.70% |
| FTC133-p16 | (P61289) Proteasome activator complex subunit 3 (Proteasome activator 28-gamma subunit) (PA28gamma) (PA28g) (Activator of multicatalytic protease subunit 3) (11S regulator complex gamma subunit) (REG-gamma) (Ki nuclear autoantigen) | PSME3_HUMAN | 29489 | 100% | 3 | 4 | 5 | 0.06% | 15.40% |
| FTC133-p16 | (P61289) Proteasome activator complex subunit 3 (Proteasome activator 28-gamma subunit) (PA28gamma) (PA28g) (Activator of multicatalytic protease subunit 3) (11S regulator complex gamma subunit) (REG-gamma) (Ki nuclear autoantigen) | PSME3_HUMAN | 29489 | 100% | 5 | 6 | 6 | 0.06% | 24.40% |
| FTC133-p16 | (P61604) 10 kDa heat shock protein, mitochondrial (Hsp10) (10 kDa chaperonin) (CPN10) (Early-pregnancy factor) (EPF)                                                                                                                    | CH10_HUMAN  | 10783 | 100% | 2 | 2 | 3 | 0.03% | 25.70% |
| FTC133-p16 | (P61604) 10 kDa heat shock protein, mitochondrial (Hsp10) (10 kDa chaperonin) (CPN10) (Early-pregnancy factor) (EPF)                                                                                                                    | CH10_HUMAN  | 10783 | 100% | 2 | 2 | 3 | 0.03% | 23.80% |
| FTC133-p16 | (P61604) 10 kDa heat shock protein, mitochondrial (Hsp10) (10 kDa chaperonin) (CPN10) (Early-pregnancy factor) (EPF)                                                                                                                    | CH10_HUMAN  | 10783 | 100% | 3 | 4 | 5 | 0.05% | 33.70% |
| FTC133-p16 | (P61604) 10 kDa heat shock protein, mitochondrial (Hsp10) (10 kDa chaperonin) (CPN10) (Early-pregnancy factor) (EPF)                                                                                                                    | CH10_HUMAN  | 10783 | 100% | 2 | 2 | 4 | 0.04% | 25.70% |
| FTC133-p16 | (P61604) 10 kDa heat shock protein, mitochondrial (Hsp10) (10 kDa chaperonin) (CPN10) (Early-pregnancy factor) (EPF)                                                                                                                    | CH10_HUMAN  | 10783 | 100% | 2 | 3 | 4 | 0.05% | 25.70% |
| FTC133-p16 | (P61604) 10 kDa heat shock protein, mitochondrial (Hsp10) (10 kDa chaperonin) (CPN10) (Early-pregnancy factor) (EPF)                                                                                                                    | CH10_HUMAN  | 10783 | 100% | 2 | 3 | 5 | 0.06% | 25.70% |
| FTC133-p16 | (P61604) 10 kDa heat shock protein, mitochondrial (Hsp10) (10 kDa chaperonin) (CPN10) (Early-pregnancy factor) (EPF)                                                                                                                    | CH10_HUMAN  | 10783 | 100% | 2 | 2 | 3 | 0.03% | 25.70% |

## Protein Identified Sequence Coverage in FTC-133

|            |                                                                                                                   |             |       |      |   |   |    |       |        |
|------------|-------------------------------------------------------------------------------------------------------------------|-------------|-------|------|---|---|----|-------|--------|
| FTC133-p16 | (P61916) Epididymal secretory protein E1 precursor (Niemann-Pick disease type C2 protein) (hE1)                   | NPC2_HUMAN  | 16552 | 100% | 3 | 3 | 4  | 0.04% | 32.50% |
| FTC133-p16 | (P61916) Epididymal secretory protein E1 precursor (Niemann-Pick disease type C2 protein) (hE1)                   | NPC2_HUMAN  | 16552 | 100% | 2 | 3 | 6  | 0.05% | 25.80% |
| FTC133-p16 | (P61916) Epididymal secretory protein E1 precursor (Niemann-Pick disease type C2 protein) (hE1)                   | NPC2_HUMAN  | 16552 | 100% | 2 | 2 | 3  | 0.03% | 26.50% |
| FTC133-p16 | (P61916) Epididymal secretory protein E1 precursor (Niemann-Pick disease type C2 protein) (hE1)                   | NPC2_HUMAN  | 16552 | 100% | 4 | 5 | 8  | 0.07% | 43.70% |
| FTC133-p16 | (P61916) Epididymal secretory protein E1 precursor (Niemann-Pick disease type C2 protein) (hE1)                   | NPC2_HUMAN  | 16552 | 100% | 3 | 4 | 7  | 0.08% | 37.10% |
| FTC133-p16 | (P61916) Epididymal secretory protein E1 precursor (Niemann-Pick disease type C2 protein) (hE1)                   | NPC2_HUMAN  | 16552 | 100% | 3 | 4 | 7  | 0.08% | 37.10% |
| FTC133-p16 | (P61916) Epididymal secretory protein E1 precursor (Niemann-Pick disease type C2 protein) (hE1)                   | NPC2_HUMAN  | 16552 | 100% | 2 | 2 | 3  | 0.04% | 26.50% |
| FTC133-p16 | (P61916) Epididymal secretory protein E1 precursor (Niemann-Pick disease type C2 protein) (hE1)                   | NPC2_HUMAN  | 16552 | 100% | 2 | 3 | 6  | 0.06% | 25.80% |
| FTC133-p16 | (P61978) Heterogeneous nuclear ribonucleoprotein K (hnRNP K) (Transformation up-regulated nuclear protein) (TUNP) | HNRPK_HUMAN | 50961 | 100% | 3 | 4 | 6  | 0.05% | 11.00% |
| FTC133-p16 | (P61978) Heterogeneous nuclear ribonucleoprotein K (hnRNP K) (Transformation up-regulated nuclear protein) (TUNP) | HNRPK_HUMAN | 50961 | 100% | 2 | 2 | 4  | 0.04% | 7.56%  |
| FTC133-p16 | (P61978) Heterogeneous nuclear ribonucleoprotein K (hnRNP K) (Transformation up-regulated nuclear protein) (TUNP) | HNRPK_HUMAN | 50961 | 100% | 2 | 2 | 2  | 0.02% | 8.42%  |
| FTC133-p16 | (P61978) Heterogeneous nuclear ribonucleoprotein K (hnRNP K) (Transformation up-regulated nuclear protein) (TUNP) | HNRPK_HUMAN | 50961 | 100% | 3 | 3 | 6  | 0.07% | 11.70% |
| FTC133-p16 | (P61978) Heterogeneous nuclear ribonucleoprotein K (hnRNP K) (Transformation up-regulated nuclear protein) (TUNP) | HNRPK_HUMAN | 50961 | 100% | 3 | 3 | 3  | 0.03% | 11.70% |
| FTC133-p16 | (P61981) 14-3-3 protein gamma (Protein kinase C inhibitor protein 1) (KCIP-1)                                     | 1433G_HUMAN | 28154 | 100% | 2 | 3 | 3  | 0.03% | 19.10% |
| FTC133-p16 | (P62081) 40S ribosomal protein S7                                                                                 | RS7_HUMAN   | 22110 | 100% | 2 | 2 | 3  | 0.03% | 26.80% |
| FTC133-p16 | (P62081) 40S ribosomal protein S7                                                                                 | RS7_HUMAN   | 22110 | 100% | 2 | 2 | 2  | 0.02% | 26.80% |
| FTC133-p16 | (P62081) 40S ribosomal protein S7                                                                                 | RS7_HUMAN   | 22110 | 100% | 2 | 2 | 2  | 0.02% | 26.80% |
| FTC133-p16 | (P62081) 40S ribosomal protein S7                                                                                 | RS7_HUMAN   | 22110 | 100% | 2 | 2 | 2  | 0.02% | 26.80% |
| FTC133-p16 | (P62191) 26S protease regulatory subunit 4 (P26s4) (Proteasome 26S subunit ATPase 1)                              | PRS4_HUMAN  | 49168 | 100% | 2 | 2 | 2  | 0.02% | 7.05%  |
| FTC133-p16 | (P62191) 26S protease regulatory subunit 4 (P26s4) (Proteasome 26S subunit ATPase 1)                              | PRS4_HUMAN  | 49168 | 100% | 2 | 3 | 4  | 0.03% | 9.32%  |
| FTC133-p16 | (P62191) 26S protease regulatory subunit 4 (P26s4) (Proteasome 26S subunit ATPase 1)                              | PRS4_HUMAN  | 49168 | 100% | 2 | 2 | 2  | 0.02% | 8.18%  |
| FTC133-p16 | (P62258) 14-3-3 protein epsilon (14-3-3E)                                                                         | 1433E_HUMAN | 29157 | 100% | 2 | 3 | 6  | 0.05% | 16.50% |
| FTC133-p16 | (P62258) 14-3-3 protein epsilon (14-3-3E)                                                                         | 1433E_HUMAN | 29157 | 100% | 4 | 5 | 23 | 0.19% | 29.00% |
| FTC133-p16 | (P62258) 14-3-3 protein epsilon (14-3-3E)                                                                         | 1433E_HUMAN | 29157 | 100% | 5 | 6 | 10 | 0.09% | 31.80% |
| FTC133-p16 | (P62258) 14-3-3 protein epsilon (14-3-3E)                                                                         | 1433E_HUMAN | 29157 | 100% | 4 | 5 | 13 | 0.15% | 27.50% |
| FTC133-p16 | (P62258) 14-3-3 protein epsilon (14-3-3E)                                                                         | 1433E_HUMAN | 29157 | 100% | 4 | 4 | 9  | 0.11% | 24.70% |
| FTC133-p16 | (P62258) 14-3-3 protein epsilon (14-3-3E)                                                                         | 1433E_HUMAN | 29157 | 100% | 5 | 6 | 18 | 0.17% | 34.90% |

## Protein Identified Sequence Coverage in FTC-133

|            |                                                                                                                                     |             |       |      |    |    |    |       |        |
|------------|-------------------------------------------------------------------------------------------------------------------------------------|-------------|-------|------|----|----|----|-------|--------|
| FTC133-p16 | (P62805) Histone H4                                                                                                                 | H4_HUMAN    | 11219 | 100% | 6  | 6  | 16 | 0.17% | 35.30% |
| FTC133-p16 | (P62805) Histone H4                                                                                                                 | H4_HUMAN    | 11219 | 100% | 2  | 2  | 4  | 0.03% | 21.60% |
| FTC133-p16 | (P62805) Histone H4                                                                                                                 | H4_HUMAN    | 11219 | 100% | 3  | 3  | 9  | 0.08% | 29.40% |
| FTC133-p16 | (P62805) Histone H4                                                                                                                 | H4_HUMAN    | 11219 | 100% | 5  | 5  | 14 | 0.13% | 52.00% |
| FTC133-p16 | (P62805) Histone H4                                                                                                                 | H4_HUMAN    | 11219 | 100% | 6  | 7  | 19 | 0.21% | 52.00% |
| FTC133-p16 | (P62805) Histone H4                                                                                                                 | H4_HUMAN    | 11219 | 100% | 5  | 6  | 12 | 0.14% | 42.20% |
| FTC133-p16 | (P62805) Histone H4                                                                                                                 | H4_HUMAN    | 11219 | 100% | 2  | 2  | 8  | 0.09% | 23.50% |
| FTC133-p16 | (P62805) Histone H4                                                                                                                 | H4_HUMAN    | 11219 | 100% | 6  | 7  | 25 | 0.23% | 52.00% |
| FTC133-p16 | (P62826) GTP-binding nuclear protein Ran (GTPase Ran) (Ras-like protein TC4) (Androgen receptor-associated protein 24)              | RAN_HUMAN   | 24274 | 100% | 2  | 2  | 2  | 0.02% | 9.77%  |
| FTC133-p16 | (P62888) 60S ribosomal protein L30                                                                                                  | RL30_HUMAN  | 12636 | 100% | 2  | 2  | 2  | 0.02% | 24.60% |
| FTC133-p16 | (P62937) Peptidyl-prolyl cis-trans isomerase A (EC 5.2.1.8) (PPlase A) (Rotamase A) (Cyclophilin A) (Cyclosporin A-binding protein) | PPIA_HUMAN  | 17864 | 100% | 2  | 3  | 17 | 0.14% | 19.50% |
| FTC133-p16 | (P62937) Peptidyl-prolyl cis-trans isomerase A (EC 5.2.1.8) (PPlase A) (Rotamase A) (Cyclophilin A) (Cyclosporin A-binding protein) | PPIA_HUMAN  | 17864 | 100% | 5  | 6  | 12 | 0.11% | 47.00% |
| FTC133-p16 | (P62937) Peptidyl-prolyl cis-trans isomerase A (EC 5.2.1.8) (PPlase A) (Rotamase A) (Cyclophilin A) (Cyclosporin A-binding protein) | PPIA_HUMAN  | 17864 | 100% | 6  | 7  | 11 | 0.12% | 54.90% |
| FTC133-p16 | (P62937) Peptidyl-prolyl cis-trans isomerase A (EC 5.2.1.8) (PPlase A) (Rotamase A) (Cyclophilin A) (Cyclosporin A-binding protein) | PPIA_HUMAN  | 17864 | 100% | 5  | 6  | 9  | 0.11% | 38.40% |
| FTC133-p16 | (P62937) Peptidyl-prolyl cis-trans isomerase A (EC 5.2.1.8) (PPlase A) (Rotamase A) (Cyclophilin A) (Cyclosporin A-binding protein) | PPIA_HUMAN  | 17864 | 100% | 6  | 7  | 13 | 0.15% | 48.80% |
| FTC133-p16 | (P62937) Peptidyl-prolyl cis-trans isomerase A (EC 5.2.1.8) (PPlase A) (Rotamase A) (Cyclophilin A) (Cyclosporin A-binding protein) | PPIA_HUMAN  | 17864 | 100% | 2  | 3  | 7  | 0.06% | 16.50% |
| FTC133-p16 | (P62988) Ubiquitin                                                                                                                  | UBIQ_HUMAN  | 8547  | 100% | 2  | 2  | 4  | 0.04% | 32.90% |
| FTC133-p16 | (P62988) Ubiquitin                                                                                                                  | UBIQ_HUMAN  | 8547  | 100% | 3  | 3  | 3  | 0.03% | 44.70% |
| FTC133-p16 | (P62988) Ubiquitin                                                                                                                  | UBIQ_HUMAN  | 8547  | 100% | 2  | 2  | 4  | 0.04% | 32.90% |
| FTC133-p16 | (P63104) 14-3-3 protein zeta/delta (Protein kinase C inhibitor protein 1) (KCIP-1)                                                  | 1433Z_HUMAN | 27728 | 100% | 4  | 6  | 11 | 0.09% | 24.10% |
| FTC133-p16 | (P63104) 14-3-3 protein zeta/delta (Protein kinase C inhibitor protein 1) (KCIP-1)                                                  | 1433Z_HUMAN | 27728 | 100% | 3  | 5  | 14 | 0.12% | 20.00% |
| FTC133-p16 | (P63104) 14-3-3 protein zeta/delta (Protein kinase C inhibitor protein 1) (KCIP-1)                                                  | 1433Z_HUMAN | 27728 | 100% | 7  | 10 | 14 | 0.13% | 39.60% |
| FTC133-p16 | (P63104) 14-3-3 protein zeta/delta (Protein kinase C inhibitor protein 1) (KCIP-1)                                                  | 1433Z_HUMAN | 27728 | 100% | 5  | 7  | 15 | 0.17% | 29.00% |
| FTC133-p16 | (P63104) 14-3-3 protein zeta/delta (Protein kinase C inhibitor protein 1) (KCIP-1)                                                  | 1433Z_HUMAN | 27728 | 100% | 7  | 9  | 17 | 0.20% | 34.70% |
| FTC133-p16 | (P63104) 14-3-3 protein zeta/delta (Protein kinase C inhibitor protein 1) (KCIP-1)                                                  | 1433Z_HUMAN | 27728 | 100% | 5  | 5  | 10 | 0.12% | 29.80% |
| FTC133-p16 | (P63104) 14-3-3 protein zeta/delta (Protein kinase C inhibitor protein 1) (KCIP-1)                                                  | 1433Z_HUMAN | 27728 | 100% | 3  | 3  | 7  | 0.10% | 15.50% |
| FTC133-p16 | (P63104) 14-3-3 protein zeta/delta (Protein kinase C inhibitor protein 1) (KCIP-1)                                                  | 1433Z_HUMAN | 27728 | 100% | 6  | 8  | 20 | 0.18% | 32.20% |
| FTC133-p16 | (P63261) Actin, cytoplasmic 2 (Gamma-actin)                                                                                         | ACTG_HUMAN  | 41776 | 100% | 9  | 11 | 41 | 0.35% | 38.90% |
| FTC133-p16 | (P63261) Actin, cytoplasmic 2 (Gamma-actin)                                                                                         | ACTG_HUMAN  | 41776 | 100% | 2  | 4  | 13 | 0.11% | 11.70% |
| FTC133-p16 | (P63261) Actin, cytoplasmic 2 (Gamma-actin)                                                                                         | ACTG_HUMAN  | 41776 | 100% | 2  | 2  | 2  | 0.02% | 13.30% |
| FTC133-p16 | (P63261) Actin, cytoplasmic 2 (Gamma-actin)                                                                                         | ACTG_HUMAN  | 41776 | 100% | 2  | 2  | 2  | 0.02% | 10.70% |
| FTC133-p16 | (P63261) Actin, cytoplasmic 2 (Gamma-actin)                                                                                         | ACTG_HUMAN  | 41776 | 100% | 10 | 15 | 37 | 0.34% | 37.60% |
| FTC133-p16 | (P63261) Actin, cytoplasmic 2 (Gamma-actin)                                                                                         | ACTG_HUMAN  | 41776 | 100% | 12 | 17 | 43 | 0.48% | 45.90% |
| FTC133-p16 | (P63261) Actin, cytoplasmic 2 (Gamma-actin)                                                                                         | ACTG_HUMAN  | 41776 | 100% | 9  | 12 | 25 | 0.29% | 38.10% |
| FTC133-p16 | (P63261) Actin, cytoplasmic 2 (Gamma-actin)                                                                                         | ACTG_HUMAN  | 41776 | 100% | 6  | 8  | 19 | 0.22% | 21.10% |

Protein Identified Sequence Coverage in FTC-133

|            |                                                                                                                        |             |       |      |    |    |    |       |        |
|------------|------------------------------------------------------------------------------------------------------------------------|-------------|-------|------|----|----|----|-------|--------|
| FTC133-p16 | (P63261) Actin, cytoplasmic 2 (Gamma-actin)                                                                            | ACTG_HUMAN  | 41776 | 100% | 4  | 4  | 12 | 0.17% | 20.00% |
| FTC133-p16 | (P63261) Actin, cytoplasmic 2 (Gamma-actin)                                                                            | ACTG_HUMAN  | 41776 | 100% | 12 | 16 | 74 | 0.68% | 45.90% |
| FTC133-p16 | (P67936) Tropomyosin alpha-4 chain (Tropomyosin-4) (TM30p1)                                                            | TPM4_HUMAN  | 28373 | 100% | 2  | 2  | 3  | 0.03% | 6.07%  |
| FTC133-p16 | (P68104) Elongation factor 1-alpha 1 (EF-1-alpha-1) (Elongation factor 1 A-1) (eEF1A-1) (Elongation factor Tu) (EF-Tu) | EF1A1_HUMAN | 50123 | 100% | 2  | 2  | 3  | 0.03% | 7.58%  |
| FTC133-p16 | (P68104) Elongation factor 1-alpha 1 (EF-1-alpha-1) (Elongation factor 1 A-1) (eEF1A-1) (Elongation factor Tu) (EF-Tu) | EF1A1_HUMAN | 50123 | 100% | 4  | 5  | 31 | 0.26% | 21.60% |
| FTC133-p16 | (P68104) Elongation factor 1-alpha 1 (EF-1-alpha-1) (Elongation factor 1 A-1) (eEF1A-1) (Elongation factor Tu) (EF-Tu) | EF1A1_HUMAN | 50123 | 100% | 4  | 6  | 45 | 0.38% | 17.30% |
| FTC133-p16 | (P68104) Elongation factor 1-alpha 1 (EF-1-alpha-1) (Elongation factor 1 A-1) (eEF1A-1) (Elongation factor Tu) (EF-Tu) | EF1A1_HUMAN | 50123 | 100% | 2  | 3  | 9  | 0.08% | 13.20% |
| FTC133-p16 | (P68104) Elongation factor 1-alpha 1 (EF-1-alpha-1) (Elongation factor 1 A-1) (eEF1A-1) (Elongation factor Tu) (EF-Tu) | EF1A1_HUMAN | 50123 | 100% | 4  | 6  | 33 | 0.28% | 18.60% |
| FTC133-p16 | (P68104) Elongation factor 1-alpha 1 (EF-1-alpha-1) (Elongation factor 1 A-1) (eEF1A-1) (Elongation factor Tu) (EF-Tu) | EF1A1_HUMAN | 50123 | 100% | 3  | 3  | 8  | 0.07% | 14.90% |
| FTC133-p16 | (P68104) Elongation factor 1-alpha 1 (EF-1-alpha-1) (Elongation factor 1 A-1) (eEF1A-1) (Elongation factor Tu) (EF-Tu) | EF1A1_HUMAN | 50123 | 100% | 10 | 13 | 21 | 0.19% | 37.90% |
| FTC133-p16 | (P68104) Elongation factor 1-alpha 1 (EF-1-alpha-1) (Elongation factor 1 A-1) (eEF1A-1) (Elongation factor Tu) (EF-Tu) | EF1A1_HUMAN | 50123 | 100% | 9  | 11 | 22 | 0.25% | 36.10% |
| FTC133-p16 | (P68104) Elongation factor 1-alpha 1 (EF-1-alpha-1) (Elongation factor 1 A-1) (eEF1A-1) (Elongation factor Tu) (EF-Tu) | EF1A1_HUMAN | 50123 | 100% | 5  | 7  | 11 | 0.13% | 22.10% |
| FTC133-p16 | (P68104) Elongation factor 1-alpha 1 (EF-1-alpha-1) (Elongation factor 1 A-1) (eEF1A-1) (Elongation factor Tu) (EF-Tu) | EF1A1_HUMAN | 50123 | 100% | 2  | 2  | 3  | 0.04% | 8.87%  |
| FTC133-p16 | (P68104) Elongation factor 1-alpha 1 (EF-1-alpha-1) (Elongation factor 1 A-1) (eEF1A-1) (Elongation factor Tu) (EF-Tu) | EF1A1_HUMAN | 50123 | 100% | 5  | 5  | 8  | 0.12% | 24.90% |
| FTC133-p16 | (P68104) Elongation factor 1-alpha 1 (EF-1-alpha-1) (Elongation factor 1 A-1) (eEF1A-1) (Elongation factor Tu) (EF-Tu) | EF1A1_HUMAN | 50123 | 100% | 10 | 13 | 47 | 0.43% | 39.60% |
| FTC133-p16 | (P68133) Actin, alpha skeletal muscle (Alpha-actin-1)                                                                  | ACTS_HUMAN  | 42034 | 100% | 2  | 2  | 4  | 0.04% | 23.90% |
| FTC133-p16 | (P68133) Actin, alpha skeletal muscle (Alpha-actin-1)                                                                  | ACTS_HUMAN  | 42034 | 100% | 2  | 2  | 3  | 0.04% | 18.80% |
| FTC133-p16 | (P68133) Actin, alpha skeletal muscle (Alpha-actin-1)                                                                  | ACTS_HUMAN  | 42034 | 100% | 2  | 2  | 4  | 0.04% | 23.90% |
| FTC133-p16 | (P68363) Tubulin alpha-ubiquitous chain (Alpha-tubulin ubiquitous) (Tubulin K-alpha-1)                                 | TBAK_HUMAN  | 50134 | 100% | 3  | 3  | 5  | 0.04% | 9.98%  |
| FTC133-p16 | (P68363) Tubulin alpha-ubiquitous chain (Alpha-tubulin ubiquitous) (Tubulin K-alpha-1)                                 | TBAK_HUMAN  | 50134 | 100% | 5  | 6  | 8  | 0.07% | 15.50% |
| FTC133-p16 | (P68363) Tubulin alpha-ubiquitous chain (Alpha-tubulin ubiquitous) (Tubulin K-alpha-1)                                 | TBAK_HUMAN  | 50134 | 100% | 3  | 4  | 22 | 0.19% | 13.30% |
| FTC133-p16 | (P68363) Tubulin alpha-ubiquitous chain (Alpha-tubulin ubiquitous) (Tubulin K-alpha-1)                                 | TBAK_HUMAN  | 50134 | 100% | 8  | 9  | 13 | 0.12% | 27.90% |
| FTC133-p16 | (P68363) Tubulin alpha-ubiquitous chain (Alpha-tubulin ubiquitous) (Tubulin K-alpha-1)                                 | TBAK_HUMAN  | 50134 | 100% | 6  | 7  | 11 | 0.12% | 20.80% |

## Protein Identified Sequence Coverage in FTC-133

|            |                                                                                                                                                  |             |       |      |   |   |    |       |        |
|------------|--------------------------------------------------------------------------------------------------------------------------------------------------|-------------|-------|------|---|---|----|-------|--------|
| FTC133-p16 | (P68363) Tubulin alpha-ubiquitous chain (Alpha-tubulin ubiquitous) (Tubulin K-alpha-1)                                                           | TBAK_HUMAN  | 50134 | 100% | 6 | 7 | 10 | 0.12% | 20.80% |
| FTC133-p16 | (P68363) Tubulin alpha-ubiquitous chain (Alpha-tubulin ubiquitous) (Tubulin K-alpha-1)                                                           | TBAK_HUMAN  | 50134 | 100% | 5 | 6 | 10 | 0.12% | 16.40% |
| FTC133-p16 | (P68363) Tubulin alpha-ubiquitous chain (Alpha-tubulin ubiquitous) (Tubulin K-alpha-1)                                                           | TBAK_HUMAN  | 50134 | 100% | 7 | 8 | 13 | 0.12% | 20.20% |
| FTC133-p16 | (P68371) Tubulin beta-2C chain (Tubulin beta-2 chain)                                                                                            | TBB2C_HUMAN | 49813 | 100% | 4 | 4 | 7  | 0.06% | 44.50% |
| FTC133-p16 | (P68371) Tubulin beta-2C chain (Tubulin beta-2 chain)                                                                                            | TBB2C_HUMAN | 49813 | 100% | 3 | 3 | 3  | 0.03% | 27.90% |
| FTC133-p16 | (P68371) Tubulin beta-2C chain (Tubulin beta-2 chain)                                                                                            | TBB2C_HUMAN | 49813 | 100% | 2 | 2 | 3  | 0.04% | 28.10% |
| FTC133-p16 | (P68371) Tubulin beta-2C chain (Tubulin beta-2 chain)                                                                                            | TBB2C_HUMAN | 49813 | 100% | 2 | 2 | 4  | 0.05% | 31.20% |
| FTC133-p16 | (P68371) Tubulin beta-2C chain (Tubulin beta-2 chain)                                                                                            | TBB2C_HUMAN | 49813 | 100% | 2 | 2 | 3  | 0.03% | 36.20% |
| FTC133-p16 | (P68431) Histone H3.1 (H3/a) (H3/b) (H3/c) (H3/d) (H3/f) (H3/h) (H3/i) (H3/j) (H3/k) (H3/l)                                                      | H31_HUMAN   | 15256 | 100% | 2 | 2 | 7  | 0.06% | 24.40% |
| FTC133-p16 | (P68431) Histone H3.1 (H3/a) (H3/b) (H3/c) (H3/d) (H3/f) (H3/h) (H3/i) (H3/j) (H3/k) (H3/l)                                                      | H31_HUMAN   | 15256 | 100% | 2 | 2 | 8  | 0.07% | 28.90% |
| FTC133-p16 | (P68431) Histone H3.1 (H3/a) (H3/b) (H3/c) (H3/d) (H3/f) (H3/h) (H3/i) (H3/j) (H3/k) (H3/l)                                                      | H31_HUMAN   | 15256 | 100% | 2 | 2 | 5  | 0.06% | 28.90% |
| FTC133-p16 | (P78371) T-complex protein 1 subunit beta (TCP-1-beta) (CCT-beta)                                                                                | TCPB_HUMAN  | 57341 | 100% | 5 | 5 | 6  | 0.05% | 14.00% |
| FTC133-p16 | (P78371) T-complex protein 1 subunit beta (TCP-1-beta) (CCT-beta)                                                                                | TCPB_HUMAN  | 57341 | 100% | 6 | 7 | 8  | 0.07% | 21.30% |
| FTC133-p16 | (P78371) T-complex protein 1 subunit beta (TCP-1-beta) (CCT-beta)                                                                                | TCPB_HUMAN  | 57341 | 100% | 2 | 2 | 3  | 0.03% | 7.30%  |
| FTC133-p16 | (P78371) T-complex protein 1 subunit beta (TCP-1-beta) (CCT-beta)                                                                                | TCPB_HUMAN  | 57341 | 100% | 2 | 2 | 3  | 0.03% | 9.18%  |
| FTC133-p16 | (P78371) T-complex protein 1 subunit beta (TCP-1-beta) (CCT-beta)                                                                                | TCPB_HUMAN  | 57341 | 100% | 2 | 2 | 3  | 0.03% | 5.81%  |
| FTC133-p16 | (P78371) T-complex protein 1 subunit beta (TCP-1-beta) (CCT-beta)                                                                                | TCPB_HUMAN  | 57341 | 100% | 2 | 2 | 3  | 0.03% | 6.93%  |
| FTC133-p16 | (P78371) T-complex protein 1 subunit beta (TCP-1-beta) (CCT-beta)                                                                                | TCPB_HUMAN  | 57341 | 100% | 4 | 4 | 4  | 0.05% | 16.10% |
| FTC133-p16 | (P78371) T-complex protein 1 subunit beta (TCP-1-beta) (CCT-beta)                                                                                | TCPB_HUMAN  | 57341 | 100% | 3 | 3 | 4  | 0.05% | 8.99%  |
| FTC133-p16 | (P78371) T-complex protein 1 subunit beta (TCP-1-beta) (CCT-beta)                                                                                | TCPB_HUMAN  | 57341 | 100% | 2 | 2 | 4  | 0.06% | 9.55%  |
| FTC133-p16 | (P78371) T-complex protein 1 subunit beta (TCP-1-beta) (CCT-beta)                                                                                | TCPB_HUMAN  | 57341 | 100% | 5 | 6 | 7  | 0.06% | 16.70% |
| FTC133-p16 | (P78417) Glutathione transferase omega-1 (EC 2.5.1.18) (GSTO 1-1)                                                                                | GSTO1_HUMAN | 27549 | 100% | 2 | 2 | 3  | 0.03% | 11.20% |
| FTC133-p16 | (P80303) Nucleobindin-2 precursor (DNA-binding protein NEFA) (Gastric cancer antigen Zg4)                                                        | NUCB2_HUMAN | 50206 | 100% | 2 | 3 | 5  | 0.05% | 7.38%  |
| FTC133-p16 | (P80303) Nucleobindin-2 precursor (DNA-binding protein NEFA) (Gastric cancer antigen Zg4)                                                        | NUCB2_HUMAN | 50206 | 100% | 2 | 3 | 4  | 0.04% | 8.57%  |
| FTC133-p16 | (P80303) Nucleobindin-2 precursor (DNA-binding protein NEFA) (Gastric cancer antigen Zg4)                                                        | NUCB2_HUMAN | 50206 | 100% | 2 | 3 | 5  | 0.06% | 10.50% |
| FTC133-p16 | (P80723) Brain acid soluble protein 1 (BASP1 protein) (Neuronal axonal membrane protein NAP-22) (22 kDa neuronal tissue-enriched acidic protein) | BASP_HUMAN  | 22544 | 100% | 4 | 6 | 12 | 0.11% | 35.80% |



## Protein Identified Sequence Coverage in FTC-133

|            |                                                                                                                                                                                                   |             |       |      |    |    |    |       |        |
|------------|---------------------------------------------------------------------------------------------------------------------------------------------------------------------------------------------------|-------------|-------|------|----|----|----|-------|--------|
| FTC133-p16 | (P80723) Brain acid soluble protein 1 (BASP1 protein) (Neuronal axonal membrane protein NAP-22) (22 kDa neuronal tissue-enriched acidic protein)                                                  | BASP_HUMAN  | 22544 | 100% | 4  | 4  | 4  | 0.04% | 31.40% |
| FTC133-p16 | (P84085) ADP-ribosylation factor 5                                                                                                                                                                | ARF5_HUMAN  | 20381 | 100% | 2  | 2  | 3  | 0.03% | 17.90% |
| FTC133-p16 | (Q00765) Receptor expression-enhancing protein 5 (Polyposis locus protein 1) (TB2 protein)                                                                                                        | REEP5_HUMAN | 21477 | 100% | 2  | 2  | 3  | 0.03% | 5.82%  |
| FTC133-p16 | (Q01105) Protein SET (Phosphatase 2A inhibitor I2PP2A) (I-2PP2A) (Template-activating factor I) (TAF-I) (HLA-DR-associated protein II) (PHAPII) (Inhibitor of granzyme A-activated DNase) (IGAAD) | SET_HUMAN   | 33471 | 100% | 2  | 2  | 2  | 0.02% | 8.62%  |
| FTC133-p16 | (Q01518) Adenylyl cyclase-associated protein 1 (CAP 1)                                                                                                                                            | CAP1_HUMAN  | 51524 | 100% | 4  | 5  | 20 | 0.17% | 17.70% |
| FTC133-p16 | (Q01518) Adenylyl cyclase-associated protein 1 (CAP 1)                                                                                                                                            | CAP1_HUMAN  | 51524 | 100% | 2  | 3  | 5  | 0.04% | 8.65%  |
| FTC133-p16 | (Q01518) Adenylyl cyclase-associated protein 1 (CAP 1)                                                                                                                                            | CAP1_HUMAN  | 51524 | 100% | 2  | 2  | 3  | 0.03% | 7.59%  |
| FTC133-p16 | (Q01518) Adenylyl cyclase-associated protein 1 (CAP 1)                                                                                                                                            | CAP1_HUMAN  | 51524 | 100% | 7  | 8  | 10 | 0.09% | 23.60% |
| FTC133-p16 | (Q01518) Adenylyl cyclase-associated protein 1 (CAP 1)                                                                                                                                            | CAP1_HUMAN  | 51524 | 100% | 5  | 6  | 8  | 0.09% | 17.50% |
| FTC133-p16 | (Q01518) Adenylyl cyclase-associated protein 1 (CAP 1)                                                                                                                                            | CAP1_HUMAN  | 51524 | 100% | 5  | 5  | 8  | 0.09% | 19.00% |
| FTC133-p16 | (Q01518) Adenylyl cyclase-associated protein 1 (CAP 1)                                                                                                                                            | CAP1_HUMAN  | 51524 | 100% | 3  | 3  | 6  | 0.07% | 8.86%  |
| FTC133-p16 | (Q01518) Adenylyl cyclase-associated protein 1 (CAP 1)                                                                                                                                            | CAP1_HUMAN  | 51524 | 100% | 3  | 3  | 5  | 0.07% | 13.90% |
| FTC133-p16 | (Q01518) Adenylyl cyclase-associated protein 1 (CAP 1)                                                                                                                                            | CAP1_HUMAN  | 51524 | 100% | 6  | 7  | 8  | 0.07% | 21.30% |
| FTC133-p16 | (Q02809) Procollagen-lysine,2-oxoglutarate 5-dioxygenase 1 precursor (EC 1.14.11.4) (Lysyl hydroxylase 1) (LH1)                                                                                   | PLOD1_HUMAN | 83535 | 100% | 2  | 2  | 2  | 0.02% | 3.58%  |
| FTC133-p16 | (Q02809) Procollagen-lysine,2-oxoglutarate 5-dioxygenase 1 precursor (EC 1.14.11.4) (Lysyl hydroxylase 1) (LH1)                                                                                   | PLOD1_HUMAN | 83535 | 100% | 3  | 3  | 7  | 0.06% | 6.33%  |
| FTC133-p16 | (Q02809) Procollagen-lysine,2-oxoglutarate 5-dioxygenase 1 precursor (EC 1.14.11.4) (Lysyl hydroxylase 1) (LH1)                                                                                   | PLOD1_HUMAN | 83535 | 100% | 5  | 5  | 5  | 0.04% | 9.63%  |
| FTC133-p16 | (Q02809) Procollagen-lysine,2-oxoglutarate 5-dioxygenase 1 precursor (EC 1.14.11.4) (Lysyl hydroxylase 1) (LH1)                                                                                   | PLOD1_HUMAN | 83535 | 100% | 11 | 12 | 18 | 0.17% | 21.60% |
| FTC133-p16 | (Q02809) Procollagen-lysine,2-oxoglutarate 5-dioxygenase 1 precursor (EC 1.14.11.4) (Lysyl hydroxylase 1) (LH1)                                                                                   | PLOD1_HUMAN | 83535 | 100% | 9  | 10 | 13 | 0.15% | 19.30% |
| FTC133-p16 | (Q02809) Procollagen-lysine,2-oxoglutarate 5-dioxygenase 1 precursor (EC 1.14.11.4) (Lysyl hydroxylase 1) (LH1)                                                                                   | PLOD1_HUMAN | 83535 | 100% | 9  | 10 | 13 | 0.15% | 19.30% |
| FTC133-p16 | (Q02809) Procollagen-lysine,2-oxoglutarate 5-dioxygenase 1 precursor (EC 1.14.11.4) (Lysyl hydroxylase 1) (LH1)                                                                                   | PLOD1_HUMAN | 83535 | 100% | 5  | 5  | 9  | 0.11% | 10.20% |
| FTC133-p16 | (Q02809) Procollagen-lysine,2-oxoglutarate 5-dioxygenase 1 precursor (EC 1.14.11.4) (Lysyl hydroxylase 1) (LH1)                                                                                   | PLOD1_HUMAN | 83535 | 100% | 3  | 3  | 4  | 0.06% | 8.12%  |
| FTC133-p16 | (Q02809) Procollagen-lysine,2-oxoglutarate 5-dioxygenase 1 precursor (EC 1.14.11.4) (Lysyl hydroxylase 1) (LH1)                                                                                   | PLOD1_HUMAN | 83535 | 100% | 7  | 7  | 10 | 0.09% | 14.00% |

## Protein Identified Sequence Coverage in FTC-133

|            |                                                                                                                                                                                                                                                     |             |        |      |    |    |    |       |        |
|------------|-----------------------------------------------------------------------------------------------------------------------------------------------------------------------------------------------------------------------------------------------------|-------------|--------|------|----|----|----|-------|--------|
| FTC133-p16 | (Q02952) A-kinase anchor protein 12 (A-kinase anchor protein 250 kDa) (AKAP 250) (Myasthenia gravis autoantigen gravin)                                                                                                                             | AKA12_HUMAN | 191414 | 100% | 2  | 2  | 3  | 0.03% | 2.64%  |
| FTC133-p16 | (Q03252) Lamin-B2                                                                                                                                                                                                                                   | LMNB2_HUMAN | 67672  | 100% | 2  | 2  | 2  | 0.02% | 4.67%  |
| FTC133-p16 | (Q04637) Eukaryotic translation initiation factor 4 gamma 1 (eIF-4-gamma 1) (eIF-4G1) (eIF-4G 1) (p220)                                                                                                                                             | IF4G1_HUMAN | 175520 | 100% | 2  | 2  | 2  | 0.02% | 2.00%  |
| FTC133-p16 | (Q04941) Proteolipid protein 2 (Intestinal membrane A4 protein) (Differentiation-dependent protein A4) (Proteolipid protein 2)                                                                                                                      | PLP2_HUMAN  | 16673  | 100% | 2  | 2  | 3  | 0.03% | 18.40% |
| FTC133-p16 | (Q05519) Splicing factor arginine/serine-rich 11 (Arginine-rich 54 kDa nuclear protein) (p54)                                                                                                                                                       | SFR11_HUMAN | 53526  | 100% | 3  | 3  | 6  | 0.06% | 10.70% |
| FTC133-p16 | (Q05519) Splicing factor arginine/serine-rich 11 (Arginine-rich 54 kDa nuclear protein) (p54)                                                                                                                                                       | SFR11_HUMAN | 53526  | 100% | 3  | 3  | 3  | 0.03% | 10.70% |
| FTC133-p16 | (Q05519) Splicing factor arginine/serine-rich 11 (Arginine-rich 54 kDa nuclear protein) (p54)                                                                                                                                                       | SFR11_HUMAN | 53526  | 100% | 3  | 3  | 4  | 0.05% | 10.70% |
| FTC133-p16 | (Q05519) Splicing factor arginine/serine-rich 11 (Arginine-rich 54 kDa nuclear protein) (p54)                                                                                                                                                       | SFR11_HUMAN | 53526  | 100% | 3  | 3  | 5  | 0.06% | 10.70% |
| FTC133-p16 | (Q05519) Splicing factor arginine/serine-rich 11 (Arginine-rich 54 kDa nuclear protein) (p54)                                                                                                                                                       | SFR11_HUMAN | 53526  | 100% | 3  | 3  | 3  | 0.03% | 10.70% |
| FTC133-p16 | (Q05639) Elongation factor 1-alpha 2 (EF-1-alpha-2) (Elongation factor 1 A-2) (eEF1A-2) (Statin S1)                                                                                                                                                 | EF1A2_HUMAN | 50453  | 100% | 2  | 2  | 2  | 0.02% | 13.60% |
| FTC133-p16 | (Q05639) Elongation factor 1-alpha 2 (EF-1-alpha-2) (Elongation factor 1 A-2) (eEF1A-2) (Statin S1)                                                                                                                                                 | EF1A2_HUMAN | 50453  | 100% | 4  | 5  | 13 | 0.11% | 21.60% |
| FTC133-p16 | (Q05639) Elongation factor 1-alpha 2 (EF-1-alpha-2) (Elongation factor 1 A-2) (eEF1A-2) (Statin S1)                                                                                                                                                 | EF1A2_HUMAN | 50453  | 100% | 2  | 2  | 3  | 0.03% | 22.90% |
| FTC133-p16 | (Q05639) Elongation factor 1-alpha 2 (EF-1-alpha-2) (Elongation factor 1 A-2) (eEF1A-2) (Statin S1)                                                                                                                                                 | EF1A2_HUMAN | 50453  | 100% | 3  | 4  | 5  | 0.06% | 34.30% |
| FTC133-p16 | (Q05639) Elongation factor 1-alpha 2 (EF-1-alpha-2) (Elongation factor 1 A-2) (eEF1A-2) (Statin S1)                                                                                                                                                 | EF1A2_HUMAN | 50453  | 100% | 3  | 3  | 4  | 0.05% | 22.90% |
| FTC133-p16 | (Q05639) Elongation factor 1-alpha 2 (EF-1-alpha-2) (Elongation factor 1 A-2) (eEF1A-2) (Statin S1)                                                                                                                                                 | EF1A2_HUMAN | 50453  | 100% | 2  | 2  | 3  | 0.04% | 20.10% |
| FTC133-p16 | (Q05639) Elongation factor 1-alpha 2 (EF-1-alpha-2) (Elongation factor 1 A-2) (eEF1A-2) (Statin S1)                                                                                                                                                 | EF1A2_HUMAN | 50453  | 100% | 2  | 2  | 2  | 0.03% | 18.40% |
| FTC133-p16 | (Q05639) Elongation factor 1-alpha 2 (EF-1-alpha-2) (Elongation factor 1 A-2) (eEF1A-2) (Statin S1)                                                                                                                                                 | EF1A2_HUMAN | 50453  | 100% | 3  | 3  | 4  | 0.04% | 36.70% |
| FTC133-p16 | (Q06323) Proteasome activator complex subunit 1 (Proteasome activator 28-alpha subunit) (PA28alpha) (PA28a) (Activator of multicatalytic protease subunit 1) (11S regulator complex alpha subunit) (REG-alpha) (Interferon gamma up-regulated I-51) | PSME1_HUMAN | 28706  | 100% | 2  | 2  | 3  | 0.03% | 10.80% |
| FTC133-p16 | (Q06323) Proteasome activator complex subunit 1 (Proteasome activator 28-alpha subunit) (PA28alpha) (PA28a) (Activator of multicatalytic protease subunit 1) (11S regulator complex alpha subunit) (REG-alpha) (Interferon gamma up-regulated I-51) | PSME1_HUMAN | 28706  | 100% | 4  | 4  | 14 | 0.12% | 18.10% |
| FTC133-p16 | (Q06323) Proteasome activator complex subunit 1 (Proteasome activator 28-alpha subunit) (PA28alpha) (PA28a) (Activator of multicatalytic protease subunit 1) (11S regulator complex alpha subunit) (REG-alpha) (Interferon gamma up-regulated I-51) | PSME1_HUMAN | 28706  | 100% | 10 | 12 | 20 | 0.18% | 38.60% |

Protein Identified Sequence Coverage in FTC-133

|            |                                                                                                                                                                                                                                                     |             |       |      |    |    |    |       |        |
|------------|-----------------------------------------------------------------------------------------------------------------------------------------------------------------------------------------------------------------------------------------------------|-------------|-------|------|----|----|----|-------|--------|
| FTC133-p16 | (Q06323) Proteasome activator complex subunit 1 (Proteasome activator 28-alpha subunit) (PA28alpha) (PA28a) (Activator of multicatalytic protease subunit 1) (11S regulator complex alpha subunit) (REG-alpha) (Interferon gamma up-regulated I-51) | PSME1_HUMAN | 28706 | 100% | 10 | 12 | 17 | 0.19% | 39.00% |
| FTC133-p16 | (Q06323) Proteasome activator complex subunit 1 (Proteasome activator 28-alpha subunit) (PA28alpha) (PA28a) (Activator of multicatalytic protease subunit 1) (11S regulator complex alpha subunit) (REG-alpha) (Interferon gamma up-regulated I-51) | PSME1_HUMAN | 28706 | 100% | 8  | 11 | 14 | 0.17% | 32.90% |
| FTC133-p16 | (Q06323) Proteasome activator complex subunit 1 (Proteasome activator 28-alpha subunit) (PA28alpha) (PA28a) (Activator of multicatalytic protease subunit 1) (11S regulator complex alpha subunit) (REG-alpha) (Interferon gamma up-regulated I-51) | PSME1_HUMAN | 28706 | 100% | 9  | 10 | 18 | 0.21% | 33.70% |
| FTC133-p16 | (Q06323) Proteasome activator complex subunit 1 (Proteasome activator 28-alpha subunit) (PA28alpha) (PA28a) (Activator of multicatalytic protease subunit 1) (11S regulator complex alpha subunit) (REG-alpha) (Interferon gamma up-regulated I-51) | PSME1_HUMAN | 28706 | 100% | 2  | 2  | 4  | 0.06% | 9.24%  |
| FTC133-p16 | (Q06323) Proteasome activator complex subunit 1 (Proteasome activator 28-alpha subunit) (PA28alpha) (PA28a) (Activator of multicatalytic protease subunit 1) (11S regulator complex alpha subunit) (REG-alpha) (Interferon gamma up-regulated I-51) | PSME1_HUMAN | 28706 | 100% | 10 | 12 | 19 | 0.18% | 39.00% |
| FTC133-p16 | (Q06481) Amyloid-like protein 2 precursor (Amyloid protein homolog) (APPH) (CDEI box-binding protein) (CDEBP)                                                                                                                                       | APLP2_HUMAN | 86937 | 100% | 2  | 3  | 4  | 0.03% | 4.72%  |
| FTC133-p16 | (Q06830) Peroxiredoxin-1 (EC 1.11.1.15) (Thioredoxin peroxidase 2) (Thioredoxin-dependent peroxide reductase 2) (Proliferation-associated protein PAG) (Natural killer cell-enhancing factor A) (NKEF-A)                                            | PRDX1_HUMAN | 22093 | 100% | 5  | 5  | 7  | 0.06% | 24.10% |
| FTC133-p16 | (Q06830) Peroxiredoxin-1 (EC 1.11.1.15) (Thioredoxin peroxidase 2) (Thioredoxin-dependent peroxide reductase 2) (Proliferation-associated protein PAG) (Natural killer cell-enhancing factor A) (NKEF-A)                                            | PRDX1_HUMAN | 22093 | 100% | 7  | 8  | 14 | 0.13% | 32.20% |
| FTC133-p16 | (Q06830) Peroxiredoxin-1 (EC 1.11.1.15) (Thioredoxin peroxidase 2) (Thioredoxin-dependent peroxide reductase 2) (Proliferation-associated protein PAG) (Natural killer cell-enhancing factor A) (NKEF-A)                                            | PRDX1_HUMAN | 22093 | 100% | 5  | 5  | 9  | 0.10% | 24.10% |
| FTC133-p16 | (Q06830) Peroxiredoxin-1 (EC 1.11.1.15) (Thioredoxin peroxidase 2) (Thioredoxin-dependent peroxide reductase 2) (Proliferation-associated protein PAG) (Natural killer cell-enhancing factor A) (NKEF-A)                                            | PRDX1_HUMAN | 22093 | 100% | 3  | 3  | 3  | 0.04% | 16.60% |

## Protein Identified Sequence Coverage in FTC-133

|            |                                                                                                                                                                                                                |                |        |      |    |    |    |       |        |
|------------|----------------------------------------------------------------------------------------------------------------------------------------------------------------------------------------------------------------|----------------|--------|------|----|----|----|-------|--------|
| FTC133-p16 | (Q06830) Peroxiredoxin-1 (EC 1.11.1.15)<br>(Thioredoxin peroxidase 2) (Thioredoxin-dependent peroxide reductase 2) (Proliferation-associated protein PAG) (Natural killer cell-enhancing factor A) (NKEF-A)    | PRDX1_HUMAN    | 22093  | 100% | 2  | 2  | 3  | 0.04% | 13.60% |
| FTC133-p16 | (Q06830) Peroxiredoxin-1 (EC 1.11.1.15)<br>(Thioredoxin peroxidase 2) (Thioredoxin-dependent peroxide reductase 2) (Proliferation-associated protein PAG) (Natural killer cell-enhancing factor A) (NKEF-A)    | PRDX1_HUMAN    | 22093  | 100% | 6  | 6  | 9  | 0.08% | 29.60% |
| FTC133-p16 | (Q07021) Complement component 1 Q subcomponent-binding protein, mitochondrial precursor (Glycoprotein gC1qBP) (C1qBP) (GC1q-R protein) (Hyaluronan-binding protein 1) (Mitochondrial matrix protein p32) (p33) | C1QBP_HUMAN    | 31345  | 100% | 3  | 3  | 5  | 0.05% | 21.60% |
| FTC133-p16 | (Q07021) Complement component 1 Q subcomponent-binding protein, mitochondrial precursor (Glycoprotein gC1qBP) (C1qBP) (GC1q-R protein) (Hyaluronan-binding protein 1) (Mitochondrial matrix protein p32) (p33) | C1QBP_HUMAN    | 31345  | 100% | 3  | 4  | 5  | 0.06% | 21.60% |
| FTC133-p16 | (Q07021) Complement component 1 Q subcomponent-binding protein, mitochondrial precursor (Glycoprotein gC1qBP) (C1qBP) (GC1q-R protein) (Hyaluronan-binding protein 1) (Mitochondrial matrix protein p32) (p33) | C1QBP_HUMAN    | 31345  | 100% | 3  | 3  | 3  | 0.04% | 22.00% |
| FTC133-p16 | (Q07021) Complement component 1 Q subcomponent-binding protein, mitochondrial precursor (Glycoprotein gC1qBP) (C1qBP) (GC1q-R protein) (Hyaluronan-binding protein 1) (Mitochondrial matrix protein p32) (p33) | C1QBP_HUMAN    | 31345  | 100% | 3  | 3  | 3  | 0.03% | 21.60% |
| FTC133-p16 | (Q07812) Apoptosis regulator BAX, membrane isoform alpha                                                                                                                                                       | BAXA_HUMAN,BAX | 24203  | 100% | 2  | 2  | 4  | 0.04% | 11.90% |
| FTC133-p16 | (Q07954) Low-density lipoprotein receptor-related protein 1 precursor (LRP) (Alpha-2-macroglobulin receptor) (A2MR) (Apolipoprotein E receptor) (APOER) (CD91 antigen)                                         | LRP1_HUMAN     | 504543 | 100% | 2  | 2  | 3  | 0.03% | 0.92%  |
| FTC133-p16 | (Q09666) Neuroblast differentiation-associated protein AHNK (Desmoyokin) (Fragments)                                                                                                                           | AHNK_HUMAN     | 312479 | 100% | 9  | 9  | 12 | 0.10% | 5.00%  |
| FTC133-p16 | (Q09666) Neuroblast differentiation-associated protein AHNK (Desmoyokin) (Fragments)                                                                                                                           | AHNK_HUMAN     | 312479 | 100% | 4  | 4  | 4  | 0.03% | 3.34%  |
| FTC133-p16 | (Q09666) Neuroblast differentiation-associated protein AHNK (Desmoyokin) (Fragments)                                                                                                                           | AHNK_HUMAN     | 312479 | 100% | 9  | 12 | 16 | 0.14% | 6.15%  |
| FTC133-p16 | (Q09666) Neuroblast differentiation-associated protein AHNK (Desmoyokin) (Fragments)                                                                                                                           | AHNK_HUMAN     | 312479 | 100% | 2  | 2  | 2  | 0.02% | 1.69%  |
| FTC133-p16 | (Q09666) Neuroblast differentiation-associated protein AHNK (Desmoyokin) (Fragments)                                                                                                                           | AHNK_HUMAN     | 312479 | 100% | 3  | 3  | 3  | 0.03% | 2.13%  |
| FTC133-p16 | (Q09666) Neuroblast differentiation-associated protein AHNK (Desmoyokin) (Fragments)                                                                                                                           | AHNK_HUMAN     | 312479 | 100% | 6  | 6  | 12 | 0.11% | 3.31%  |
| FTC133-p16 | (Q09666) Neuroblast differentiation-associated protein AHNK (Desmoyokin) (Fragments)                                                                                                                           | AHNK_HUMAN     | 312479 | 100% | 11 | 11 | 14 | 0.16% | 5.30%  |
| FTC133-p16 | (Q09666) Neuroblast differentiation-associated protein AHNK (Desmoyokin) (Fragments)                                                                                                                           | AHNK_HUMAN     | 312479 | 100% | 8  | 8  | 9  | 0.11% | 5.30%  |
| FTC133-p16 | (Q09666) Neuroblast differentiation-associated protein AHNK (Desmoyokin) (Fragments)                                                                                                                           | AHNK_HUMAN     | 312479 | 100% | 5  | 5  | 6  | 0.07% | 3.41%  |
| FTC133-p16 | (Q09666) Neuroblast differentiation-associated protein AHNK (Desmoyokin) (Fragments)                                                                                                                           | AHNK_HUMAN     | 312479 | 100% | 5  | 5  | 5  | 0.07% | 4.63%  |

## Protein Identified Sequence Coverage in FTC-133

|            |                                                                                                                                                                                                                                                     |             |        |      |    |    |    |       |        |
|------------|-----------------------------------------------------------------------------------------------------------------------------------------------------------------------------------------------------------------------------------------------------|-------------|--------|------|----|----|----|-------|--------|
| FTC133-p16 | (Q09666) Neuroblast differentiation-associated protein AHNAK (Desmoyokin) (Fragments)                                                                                                                                                               | AHNK_HUMAN  | 312479 | 100% | 12 | 12 | 16 | 0.15% | 6.01%  |
| FTC133-p16 | (Q12874) Splicing factor 3A subunit 3 (Spliceosome-associated protein 61) (SAP 61) (SF3a60)                                                                                                                                                         | SF3A3_HUMAN | 58833  | 100% | 2  | 2  | 2  | 0.03% | 7.58%  |
| FTC133-p16 | (Q12905) Interleukin enhancer-binding factor 2 (Nuclear factor of activated T-cells 45 kDa)                                                                                                                                                         | ILF2_HUMAN  | 43045  | 100% | 2  | 2  | 2  | 0.02% | 11.00% |
| FTC133-p16 | (Q12905) Interleukin enhancer-binding factor 2 (Nuclear factor of activated T-cells 45 kDa)                                                                                                                                                         | ILF2_HUMAN  | 43045  | 100% | 2  | 2  | 2  | 0.02% | 13.10% |
| FTC133-p16 | (Q12906) Interleukin enhancer-binding factor 3 (Nuclear factor of activated T-cells 90 kDa) (NF-AT-90) (Double-stranded RNA-binding protein 76) (DRBP76) (Translational control protein 80) (TCP80) (Nuclear factor associated with dsRNA) (NFAR) ( | ILF3_HUMAN  | 95321  | 100% | 3  | 3  | 6  | 0.05% | 9.17%  |
| FTC133-p16 | (Q13126) S-methyl-5-thioadenosine phosphorylase (EC 2.4.2.28) (5'-methylthioadenosine phosphorylase) (MTA phosphorylase) (MTAPase)                                                                                                                  | MTAP_HUMAN  | 31232  | 100% | 2  | 2  | 2  | 0.02% | 19.10% |
| FTC133-p16 | (Q13509) Tubulin beta-3 chain (Tubulin beta-III) (Tubulin beta-4)                                                                                                                                                                                   | TBB3_HUMAN  | 50415  | 100% | 2  | 2  | 2  | 0.02% | 15.60% |
| FTC133-p16 | (Q13510) Acid ceramidase precursor (EC 3.5.1.23) (Acylsphingosine deacylase) (N-acylsphingosine amidohydrolase) (AC) (Putative 32 kDa heart protein) (PHP32) [Contains: Acid ceramidase alpha subunit; Acid ceramidase beta subunit]                | ASAH1_HUMAN | 44633  | 100% | 3  | 3  | 3  | 0.03% | 11.60% |
| FTC133-p16 | (Q13561) Dynactin subunit 2 (Dynactin complex 50 kDa subunit) (50 kDa dynein-associated polypeptide) (p50 dynamitin) (DCTN-50)                                                                                                                      | DCTN2_HUMAN | 44083  | 100% | 4  | 4  | 5  | 0.04% | 17.00% |
| FTC133-p16 | (Q13561) Dynactin subunit 2 (Dynactin complex 50 kDa subunit) (50 kDa dynein-associated polypeptide) (p50 dynamitin) (DCTN-50)                                                                                                                      | DCTN2_HUMAN | 44083  | 100% | 2  | 2  | 6  | 0.05% | 6.00%  |
| FTC133-p16 | (Q13561) Dynactin subunit 2 (Dynactin complex 50 kDa subunit) (50 kDa dynein-associated polypeptide) (p50 dynamitin) (DCTN-50)                                                                                                                      | DCTN2_HUMAN | 44083  | 100% | 4  | 4  | 6  | 0.06% | 19.00% |
| FTC133-p16 | (Q13561) Dynactin subunit 2 (Dynactin complex 50 kDa subunit) (50 kDa dynein-associated polypeptide) (p50 dynamitin) (DCTN-50)                                                                                                                      | DCTN2_HUMAN | 44083  | 100% | 2  | 2  | 3  | 0.03% | 8.25%  |
| FTC133-p16 | (Q13561) Dynactin subunit 2 (Dynactin complex 50 kDa subunit) (50 kDa dynein-associated polypeptide) (p50 dynamitin) (DCTN-50)                                                                                                                      | DCTN2_HUMAN | 44083  | 100% | 4  | 4  | 4  | 0.05% | 16.20% |
| FTC133-p16 | (Q13561) Dynactin subunit 2 (Dynactin complex 50 kDa subunit) (50 kDa dynein-associated polypeptide) (p50 dynamitin) (DCTN-50)                                                                                                                      | DCTN2_HUMAN | 44083  | 100% | 2  | 2  | 4  | 0.05% | 8.25%  |
| FTC133-p16 | (Q13561) Dynactin subunit 2 (Dynactin complex 50 kDa subunit) (50 kDa dynein-associated polypeptide) (p50 dynamitin) (DCTN-50)                                                                                                                      | DCTN2_HUMAN | 44083  | 100% | 3  | 4  | 4  | 0.04% | 10.50% |
| FTC133-p16 | (Q13641) Trophoblast glycoprotein precursor (5T4 oncofetal trophoblast glycoprotein) (5T4 oncotrophoblast glycoprotein) (5T4 oncofetal antigen) (M6P1)                                                                                              | TPBG_HUMAN  | 46015  | 100% | 2  | 3  | 4  | 0.04% | 7.14%  |
| FTC133-p16 | (Q13740) CD166 antigen precursor (Activated leukocyte-cell adhesion molecule) (ALCAM)                                                                                                                                                               | CD166_HUMAN | 65116  | 100% | 2  | 2  | 2  | 0.02% | 7.55%  |
| FTC133-p16 | (Q13740) CD166 antigen precursor (Activated leukocyte-cell adhesion molecule) (ALCAM)                                                                                                                                                               | CD166_HUMAN | 65116  | 100% | 2  | 2  | 3  | 0.03% | 6.86%  |

## Protein Identified Sequence Coverage in FTC-133

|            |                                                                                                                                                                                  |             |        |      |   |   |   |       |        |
|------------|----------------------------------------------------------------------------------------------------------------------------------------------------------------------------------|-------------|--------|------|---|---|---|-------|--------|
| FTC133-p16 | (Q13813) Spectrin alpha chain, brain (Spectrin, non-erythroid alpha chain) (Alpha-II spectrin) (Fodrin alpha chain)                                                              | SPTA2_HUMAN | 284525 | 100% | 4 | 4 | 4 | 0.03% | 3.32%  |
| FTC133-p16 | (Q13838) Spliceosome RNA helicase BAT1 (EC 3.6.1.-) (DEAD box protein UAP56) (56 kDa U2AF65-associated protein) (ATP-dependent RNA helicase p47) (HLA-B-associated transcript-1) | UAP56_HUMAN | 48974  | 100% | 3 | 3 | 3 | 0.03% | 10.70% |
| FTC133-p16 | (Q13838) Spliceosome RNA helicase BAT1 (EC 3.6.1.-) (DEAD box protein UAP56) (56 kDa U2AF65-associated protein) (ATP-dependent RNA helicase p47) (HLA-B-associated transcript-1) | UAP56_HUMAN | 48974  | 100% | 2 | 2 | 2 | 0.02% | 6.78%  |
| FTC133-p16 | (Q13838) Spliceosome RNA helicase BAT1 (EC 3.6.1.-) (DEAD box protein UAP56) (56 kDa U2AF65-associated protein) (ATP-dependent RNA helicase p47) (HLA-B-associated transcript-1) | UAP56_HUMAN | 48974  | 100% | 2 | 2 | 2 | 0.02% | 4.67%  |
| FTC133-p16 | (Q13838) Spliceosome RNA helicase BAT1 (EC 3.6.1.-) (DEAD box protein UAP56) (56 kDa U2AF65-associated protein) (ATP-dependent RNA helicase p47) (HLA-B-associated transcript-1) | UAP56_HUMAN | 48974  | 100% | 2 | 2 | 3 | 0.04% | 9.58%  |
| FTC133-p16 | (Q13838) Spliceosome RNA helicase BAT1 (EC 3.6.1.-) (DEAD box protein UAP56) (56 kDa U2AF65-associated protein) (ATP-dependent RNA helicase p47) (HLA-B-associated transcript-1) | UAP56_HUMAN | 48974  | 100% | 3 | 3 | 3 | 0.03% | 7.94%  |
| FTC133-p16 | (Q14103) Heterogeneous nuclear ribonucleoprotein D0 (hnRNP D0) (AU-rich element RNA-binding protein 1)                                                                           | HNRPD_HUMAN | 38417  | 100% | 2 | 2 | 2 | 0.02% | 9.30%  |
| FTC133-p16 | (Q14103) Heterogeneous nuclear ribonucleoprotein D0 (hnRNP D0) (AU-rich element RNA-binding protein 1)                                                                           | HNRPD_HUMAN | 38417  | 100% | 2 | 2 | 2 | 0.02% | 8.73%  |
| FTC133-p16 | (Q14103) Heterogeneous nuclear ribonucleoprotein D0 (hnRNP D0) (AU-rich element RNA-binding protein 1)                                                                           | HNRPD_HUMAN | 38417  | 100% | 2 | 2 | 2 | 0.02% | 4.51%  |
| FTC133-p16 | (Q14118) Dystroglycan precursor (Dystrophin-associated glycoprotein 1) [Contains: Alpha-dystroglycan (Alpha-DG); Beta-dystroglycan (Beta-DG)]                                    | DAG1_HUMAN  | 97563  | 100% | 2 | 2 | 4 | 0.03% | 5.81%  |
| FTC133-p16 | (Q14118) Dystroglycan precursor (Dystrophin-associated glycoprotein 1) [Contains: Alpha-dystroglycan (Alpha-DG); Beta-dystroglycan (Beta-DG)]                                    | DAG1_HUMAN  | 97563  | 100% | 2 | 2 | 2 | 0.02% | 4.47%  |
| FTC133-p16 | (Q14257) Reticulocalbin-2 precursor (Calcium-binding protein ERC-55) (E6-binding protein) (E6BP)                                                                                 | RCN2_HUMAN  | 36860  | 100% | 3 | 3 | 3 | 0.03% | 17.00% |
| FTC133-p16 | (Q14315) Filamin-C (Gamma-filamin) (Filamin-2) (Protein FLNc) (Actin-binding-like protein) (ABP-L) (ABP-280-like protein)                                                        | FLNC_HUMAN  | 290934 | 100% | 2 | 2 | 2 | 0.02% | 1.47%  |
| FTC133-p16 | (Q14498) RNA-binding region-containing protein 2 (Hepatocellular carcinoma protein 1) (Splicing factor HCC1)                                                                     | RNPC2_HUMAN | 59363  | 100% | 2 | 2 | 2 | 0.02% | 8.49%  |
| FTC133-p16 | (Q14498) RNA-binding region-containing protein 2 (Hepatocellular carcinoma protein 1) (Splicing factor HCC1)                                                                     | RNPC2_HUMAN | 59363  | 100% | 2 | 2 | 3 | 0.04% | 10.00% |

## Protein Identified Sequence Coverage in FTC-133

|            |                                                                                                                                           |             |        |      |   |    |    |       |        |
|------------|-------------------------------------------------------------------------------------------------------------------------------------------|-------------|--------|------|---|----|----|-------|--------|
| FTC133-p16 | (Q14697) Neutral alpha-glucosidase AB precursor (EC 3.2.1.84) (Glucosidase II alpha subunit)                                              | GANAB_HUMAN | 106858 | 100% | 2 | 2  | 2  | 0.02% | 4.45%  |
| FTC133-p16 | (Q14764) Major vault protein (MVP) (Lung resistance-related protein)                                                                      | MVP_HUMAN   | 99177  | 100% | 3 | 3  | 4  | 0.03% | 4.60%  |
| FTC133-p16 | (Q14764) Major vault protein (MVP) (Lung resistance-related protein)                                                                      | MVP_HUMAN   | 99177  | 100% | 2 | 2  | 2  | 0.02% | 6.39%  |
| FTC133-p16 | (Q14764) Major vault protein (MVP) (Lung resistance-related protein)                                                                      | MVP_HUMAN   | 99177  | 100% | 9 | 11 | 21 | 0.18% | 19.30% |
| FTC133-p16 | (Q14764) Major vault protein (MVP) (Lung resistance-related protein)                                                                      | MVP_HUMAN   | 99177  | 100% | 3 | 4  | 6  | 0.05% | 8.86%  |
| FTC133-p16 | (Q14764) Major vault protein (MVP) (Lung resistance-related protein)                                                                      | MVP_HUMAN   | 99177  | 100% | 2 | 2  | 2  | 0.02% | 5.16%  |
| FTC133-p16 | (Q14764) Major vault protein (MVP) (Lung resistance-related protein)                                                                      | MVP_HUMAN   | 99177  | 100% | 5 | 6  | 9  | 0.08% | 11.40% |
| FTC133-p16 | (Q14764) Major vault protein (MVP) (Lung resistance-related protein)                                                                      | MVP_HUMAN   | 99177  | 100% | 4 | 4  | 5  | 0.06% | 8.07%  |
| FTC133-p16 | (Q14764) Major vault protein (MVP) (Lung resistance-related protein)                                                                      | MVP_HUMAN   | 99177  | 100% | 4 | 4  | 4  | 0.05% | 8.52%  |
| FTC133-p16 | (Q14764) Major vault protein (MVP) (Lung resistance-related protein)                                                                      | MVP_HUMAN   | 99177  | 100% | 2 | 2  | 3  | 0.04% | 9.98%  |
| FTC133-p16 | (Q14764) Major vault protein (MVP) (Lung resistance-related protein)                                                                      | MVP_HUMAN   | 99177  | 100% | 4 | 4  | 4  | 0.04% | 11.70% |
| FTC133-p16 | (Q15084) Protein disulfide-isomerase A6 precursor (EC 5.3.4.1) (Protein disulfide isomerase P5) (Thioredoxin domain-containing protein 7) | PDIA6_HUMAN | 48104  | 100% | 7 | 7  | 8  | 0.08% | 23.00% |
| FTC133-p16 | (Q15084) Protein disulfide-isomerase A6 precursor (EC 5.3.4.1) (Protein disulfide isomerase P5) (Thioredoxin domain-containing protein 7) | PDIA6_HUMAN | 48104  | 100% | 4 | 6  | 9  | 0.08% | 17.70% |
| FTC133-p16 | (Q15084) Protein disulfide-isomerase A6 precursor (EC 5.3.4.1) (Protein disulfide isomerase P5) (Thioredoxin domain-containing protein 7) | PDIA6_HUMAN | 48104  | 100% | 2 | 3  | 3  | 0.03% | 12.00% |
| FTC133-p16 | (Q15084) Protein disulfide-isomerase A6 precursor (EC 5.3.4.1) (Protein disulfide isomerase P5) (Thioredoxin domain-containing protein 7) | PDIA6_HUMAN | 48104  | 100% | 4 | 6  | 23 | 0.19% | 17.70% |
| FTC133-p16 | (Q15084) Protein disulfide-isomerase A6 precursor (EC 5.3.4.1) (Protein disulfide isomerase P5) (Thioredoxin domain-containing protein 7) | PDIA6_HUMAN | 48104  | 100% | 7 | 8  | 14 | 0.13% | 30.20% |
| FTC133-p16 | (Q15084) Protein disulfide-isomerase A6 precursor (EC 5.3.4.1) (Protein disulfide isomerase P5) (Thioredoxin domain-containing protein 7) | PDIA6_HUMAN | 48104  | 100% | 7 | 8  | 14 | 0.16% | 30.00% |
| FTC133-p16 | (Q15084) Protein disulfide-isomerase A6 precursor (EC 5.3.4.1) (Protein disulfide isomerase P5) (Thioredoxin domain-containing protein 7) | PDIA6_HUMAN | 48104  | 100% | 9 | 10 | 20 | 0.24% | 37.70% |
| FTC133-p16 | (Q15084) Protein disulfide-isomerase A6 precursor (EC 5.3.4.1) (Protein disulfide isomerase P5) (Thioredoxin domain-containing protein 7) | PDIA6_HUMAN | 48104  | 100% | 5 | 5  | 9  | 0.11% | 18.90% |

## Protein Identified Sequence Coverage in FTC-133

|            |                                                                                                                                                                                                                             |             |       |      |   |    |    |       |        |
|------------|-----------------------------------------------------------------------------------------------------------------------------------------------------------------------------------------------------------------------------|-------------|-------|------|---|----|----|-------|--------|
| FTC133-p16 | (Q15084) Protein disulfide-isomerase A6 precursor (EC 5.3.4.1) (Protein disulfide isomerase P5) (Thioredoxin domain-containing protein 7)                                                                                   | PDIA6_HUMAN | 48104 | 100% | 3 | 3  | 5  | 0.07% | 16.80% |
| FTC133-p16 | (Q15084) Protein disulfide-isomerase A6 precursor (EC 5.3.4.1) (Protein disulfide isomerase P5) (Thioredoxin domain-containing protein 7)                                                                                   | PDIA6_HUMAN | 48104 | 100% | 9 | 12 | 20 | 0.18% | 34.50% |
| FTC133-p16 | (Q15181) Inorganic pyrophosphatase (EC 3.6.1.1) (Pyrophosphate phospho-hydrolase) (PPase)                                                                                                                                   | IPYR_HUMAN  | 32643 | 100% | 2 | 3  | 3  | 0.03% | 14.20% |
| FTC133-p16 | (Q15181) Inorganic pyrophosphatase (EC 3.6.1.1) (Pyrophosphate phospho-hydrolase) (PPase)                                                                                                                                   | IPYR_HUMAN  | 32643 | 100% | 2 | 2  | 2  | 0.02% | 8.65%  |
| FTC133-p16 | (Q15233) Non-POU domain-containing octamer-binding protein (NonO protein) (54 kDa nuclear RNA- and DNA-binding protein) (p54(nrb)) (p54nrb) (55 kDa nuclear protein) (NMT55) (DNA-binding p52/p100 complex, 52 kDa subunit) | NONO_HUMAN  | 54214 | 100% | 2 | 2  | 2  | 0.02% | 7.64%  |
| FTC133-p16 | (Q15233) Non-POU domain-containing octamer-binding protein (NonO protein) (54 kDa nuclear RNA- and DNA-binding protein) (p54(nrb)) (p54nrb) (55 kDa nuclear protein) (NMT55) (DNA-binding p52/p100 complex, 52 kDa subunit) | NONO_HUMAN  | 54214 | 100% | 2 | 3  | 7  | 0.06% | 12.50% |
| FTC133-p16 | (Q15233) Non-POU domain-containing octamer-binding protein (NonO protein) (54 kDa nuclear RNA- and DNA-binding protein) (p54(nrb)) (p54nrb) (55 kDa nuclear protein) (NMT55) (DNA-binding p52/p100 complex, 52 kDa subunit) | NONO_HUMAN  | 54214 | 100% | 2 | 4  | 5  | 0.04% | 12.50% |
| FTC133-p16 | (Q15233) Non-POU domain-containing octamer-binding protein (NonO protein) (54 kDa nuclear RNA- and DNA-binding protein) (p54(nrb)) (p54nrb) (55 kDa nuclear protein) (NMT55) (DNA-binding p52/p100 complex, 52 kDa subunit) | NONO_HUMAN  | 54214 | 100% | 2 | 2  | 2  | 0.02% | 6.58%  |
| FTC133-p16 | (Q15233) Non-POU domain-containing octamer-binding protein (NonO protein) (54 kDa nuclear RNA- and DNA-binding protein) (p54(nrb)) (p54nrb) (55 kDa nuclear protein) (NMT55) (DNA-binding p52/p100 complex, 52 kDa subunit) | NONO_HUMAN  | 54214 | 100% | 2 | 2  | 2  | 0.02% | 9.55%  |
| FTC133-p16 | (Q15293) Reticulocalbin-1 precursor                                                                                                                                                                                         | RCN1_HUMAN  | 38873 | 100% | 3 | 3  | 3  | 0.03% | 11.80% |
| FTC133-p16 | (Q15293) Reticulocalbin-1 precursor                                                                                                                                                                                         | RCN1_HUMAN  | 38873 | 100% | 3 | 3  | 3  | 0.03% | 15.70% |
| FTC133-p16 | (Q15293) Reticulocalbin-1 precursor                                                                                                                                                                                         | RCN1_HUMAN  | 38873 | 100% | 4 | 4  | 8  | 0.07% | 21.10% |
| FTC133-p16 | (Q15293) Reticulocalbin-1 precursor                                                                                                                                                                                         | RCN1_HUMAN  | 38873 | 100% | 2 | 2  | 2  | 0.02% | 12.70% |
| FTC133-p16 | (Q15293) Reticulocalbin-1 precursor                                                                                                                                                                                         | RCN1_HUMAN  | 38873 | 100% | 2 | 2  | 3  | 0.04% | 8.16%  |
| FTC133-p16 | (Q15293) Reticulocalbin-1 precursor                                                                                                                                                                                         | RCN1_HUMAN  | 38873 | 100% | 3 | 3  | 4  | 0.04% | 17.50% |
| FTC133-p16 | (Q15363) Transmembrane emp24 domain trafficking protein 2 precursor (Membrane protein p24A)                                                                                                                                 | TMED2_HUMAN | 22743 | 100% | 2 | 2  | 2  | 0.02% | 14.40% |
| FTC133-p16 | (Q15363) Transmembrane emp24 domain trafficking protein 2 precursor (Membrane protein p24A)                                                                                                                                 | TMED2_HUMAN | 22743 | 100% | 3 | 3  | 4  | 0.04% | 26.40% |
| FTC133-p16 | (Q15363) Transmembrane emp24 domain trafficking protein 2 precursor (Membrane protein p24A)                                                                                                                                 | TMED2_HUMAN | 22743 | 100% | 2 | 2  | 2  | 0.02% | 20.40% |
| FTC133-p16 | (Q15363) Transmembrane emp24 domain trafficking protein 2 precursor (Membrane protein p24A)                                                                                                                                 | TMED2_HUMAN | 22743 | 100% | 2 | 2  | 2  | 0.02% | 20.40% |



## Protein Identified Sequence Coverage in FTC-133

|            |                                                                                                                                                                                     |             |        |      |   |   |   |       |        |
|------------|-------------------------------------------------------------------------------------------------------------------------------------------------------------------------------------|-------------|--------|------|---|---|---|-------|--------|
| FTC133-p16 | (Q15417) Calponin-3 (Calponin, acidic isoform)                                                                                                                                      | CNN3_HUMAN  | 36397  | 100% | 2 | 2 | 3 | 0.03% | 10.30% |
| FTC133-p16 | (Q15417) Calponin-3 (Calponin, acidic isoform)                                                                                                                                      | CNN3_HUMAN  | 36397  | 100% | 2 | 2 | 2 | 0.02% | 11.90% |
| FTC133-p16 | (Q15417) Calponin-3 (Calponin, acidic isoform)                                                                                                                                      | CNN3_HUMAN  | 36397  | 100% | 2 | 2 | 2 | 0.02% | 12.20% |
| FTC133-p16 | (Q15459) Splicing factor 3 subunit 1 (Spliceosome-associated protein 114) (SAP 114) (SF3a120)                                                                                       | SF3A1_HUMAN | 88868  | 100% | 2 | 2 | 2 | 0.02% | 4.67%  |
| FTC133-p16 | (Q15459) Splicing factor 3 subunit 1 (Spliceosome-associated protein 114) (SAP 114) (SF3a120)                                                                                       | SF3A1_HUMAN | 88868  | 100% | 3 | 4 | 7 | 0.06% | 7.19%  |
| FTC133-p16 | (Q15459) Splicing factor 3 subunit 1 (Spliceosome-associated protein 114) (SAP 114) (SF3a120)                                                                                       | SF3A1_HUMAN | 88868  | 100% | 2 | 2 | 2 | 0.02% | 4.92%  |
| FTC133-p16 | (Q15459) Splicing factor 3 subunit 1 (Spliceosome-associated protein 114) (SAP 114) (SF3a120)                                                                                       | SF3A1_HUMAN | 88868  | 100% | 7 | 7 | 8 | 0.07% | 14.00% |
| FTC133-p16 | (Q15459) Splicing factor 3 subunit 1 (Spliceosome-associated protein 114) (SAP 114) (SF3a120)                                                                                       | SF3A1_HUMAN | 88868  | 100% | 4 | 4 | 4 | 0.04% | 8.83%  |
| FTC133-p16 | (Q15459) Splicing factor 3 subunit 1 (Spliceosome-associated protein 114) (SAP 114) (SF3a120)                                                                                       | SF3A1_HUMAN | 88868  | 100% | 4 | 4 | 4 | 0.05% | 10.80% |
| FTC133-p16 | (Q15459) Splicing factor 3 subunit 1 (Spliceosome-associated protein 114) (SAP 114) (SF3a120)                                                                                       | SF3A1_HUMAN | 88868  | 100% | 5 | 5 | 8 | 0.12% | 14.80% |
| FTC133-p16 | (Q15459) Splicing factor 3 subunit 1 (Spliceosome-associated protein 114) (SAP 114) (SF3a120)                                                                                       | SF3A1_HUMAN | 88868  | 100% | 4 | 4 | 4 | 0.04% | 9.33%  |
| FTC133-p16 | (Q15758) Neutral amino acid transporter B(0) (ATB(0)) (Sodium-dependent neutral amino acid transporter type 2) (RD114/simian type D retrovirus receptor) (Baboon M7 virus receptor) | AAAT_HUMAN  | 56582  | 100% | 2 | 2 | 2 | 0.02% | 5.73%  |
| FTC133-p16 | (Q16363) Laminin alpha-4 chain precursor                                                                                                                                            | LAMA4_HUMAN | 202512 | 100% | 3 | 3 | 5 | 0.04% | 2.85%  |
| FTC133-p16 | (Q16881) Thioredoxin reductase 1, cytoplasmic precursor (EC 1.8.1.9) (TR) (TR1)                                                                                                     | TRXR1_HUMAN | 54689  | 100% | 2 | 2 | 2 | 0.02% | 11.80% |
| FTC133-p16 | (Q16891) Mitochondrial inner membrane protein (Mitofilin) (p87/89) (Proliferation-inducing gene 4 protein)                                                                          | IMMT_HUMAN  | 83661  | 100% | 5 | 5 | 8 | 0.07% | 9.37%  |
| FTC133-p16 | (Q16891) Mitochondrial inner membrane protein (Mitofilin) (p87/89) (Proliferation-inducing gene 4 protein)                                                                          | IMMT_HUMAN  | 83661  | 100% | 2 | 2 | 2 | 0.02% | 4.75%  |
| FTC133-p16 | (Q16891) Mitochondrial inner membrane protein (Mitofilin) (p87/89) (Proliferation-inducing gene 4 protein)                                                                          | IMMT_HUMAN  | 83661  | 100% | 2 | 2 | 2 | 0.02% | 3.69%  |
| FTC133-p16 | (Q5ZPR3) CD276 antigen precursor (Costimulatory molecule) (B7 homolog 3) (B7-H3) (4lg-B7-H3)                                                                                        | CD276_HUMAN | 57216  | 100% | 3 | 5 | 8 | 0.08% | 9.18%  |
| FTC133-p16 | (Q5ZPR3) CD276 antigen precursor (Costimulatory molecule) (B7 homolog 3) (B7-H3) (4lg-B7-H3)                                                                                        | CD276_HUMAN | 57216  | 100% | 2 | 3 | 6 | 0.06% | 5.62%  |
| FTC133-p16 | (Q5ZPR3) CD276 antigen precursor (Costimulatory molecule) (B7 homolog 3) (B7-H3) (4lg-B7-H3)                                                                                        | CD276_HUMAN | 57216  | 100% | 2 | 3 | 3 | 0.03% | 9.36%  |
| FTC133-p16 | (Q5ZPR3) CD276 antigen precursor (Costimulatory molecule) (B7 homolog 3) (B7-H3) (4lg-B7-H3)                                                                                        | CD276_HUMAN | 57216  | 100% | 2 | 2 | 2 | 0.02% | 7.49%  |

Protein Identified Sequence Coverage in FTC-133

|            |                                                                                                                                                                                                 |                 |        |      |    |    |    |       |        |
|------------|-------------------------------------------------------------------------------------------------------------------------------------------------------------------------------------------------|-----------------|--------|------|----|----|----|-------|--------|
| FTC133-p16 | (Q5ZPR3) CD276 antigen precursor (Costimulatory molecule) (B7 homolog 3) (B7-H3) (4lg-B7-H3)                                                                                                    | CD276_HUMAN     | 57216  | 100% | 2  | 2  | 3  | 0.03% | 8.24%  |
| FTC133-p16 | (Q5ZPR3) CD276 antigen precursor (Costimulatory molecule) (B7 homolog 3) (B7-H3) (4lg-B7-H3)                                                                                                    | CD276_HUMAN     | 57216  | 100% | 2  | 2  | 4  | 0.04% | 8.24%  |
| FTC133-p16 | (Q6EMK4) Vasorin precursor (Protein Slit-like 2)                                                                                                                                                | VASN_HUMAN      | 71696  | 100% | 2  | 2  | 5  | 0.04% | 4.75%  |
| FTC133-p16 | (Q6EMK4) Vasorin precursor (Protein Slit-like 2)                                                                                                                                                | VASN_HUMAN      | 71696  | 100% | 3  | 3  | 3  | 0.03% | 5.79%  |
| FTC133-p16 | (Q6EMK4) Vasorin precursor (Protein Slit-like 2)                                                                                                                                                | VASN_HUMAN      | 71696  | 100% | 2  | 2  | 3  | 0.03% | 4.46%  |
| FTC133-p16 | (Q6EMK4) Vasorin precursor (Protein Slit-like 2)                                                                                                                                                | VASN_HUMAN      | 71696  | 100% | 2  | 2  | 3  | 0.04% | 4.61%  |
| FTC133-p16 | (Q6EMK4) Vasorin precursor (Protein Slit-like 2)                                                                                                                                                | VASN_HUMAN      | 71696  | 100% | 2  | 2  | 2  | 0.02% | 4.61%  |
| FTC133-p16 | (Q6EMK4) Vasorin precursor (Protein Slit-like 2)                                                                                                                                                | VASN_HUMAN      | 71696  | 100% | 2  | 2  | 2  | 0.02% | 4.61%  |
| FTC133-p16 | (Q6F113) Histone H2A type 2-A (H2A.2)                                                                                                                                                           | H2A2A_HUMAN,H2A | 13840  | 100% | 2  | 3  | 7  | 0.07% | 23.40% |
| FTC133-p16 | (Q6F113) Histone H2A type 2-A (H2A.2)                                                                                                                                                           | H2A2A_HUMAN,H2A | 13947  | 100% | 2  | 3  | 7  | 0.06% | 44.20% |
| FTC133-p16 | (Q6NZI2) Polymerase I and transcript release factor (PTRF protein)                                                                                                                              | PTRF_HUMAN      | 43459  | 100% | 2  | 2  | 2  | 0.02% | 8.46%  |
| FTC133-p16 | (Q6NZI2) Polymerase I and transcript release factor (PTRF protein)                                                                                                                              | PTRF_HUMAN      | 43459  | 100% | 2  | 2  | 2  | 0.02% | 7.44%  |
| FTC133-p16 | (Q6NZI2) Polymerase I and transcript release factor (PTRF protein)                                                                                                                              | PTRF_HUMAN      | 43459  | 100% | 2  | 2  | 2  | 0.02% | 8.46%  |
| FTC133-p16 | (Q6NZI2) Polymerase I and transcript release factor (PTRF protein)                                                                                                                              | PTRF_HUMAN      | 43459  | 100% | 3  | 3  | 3  | 0.03% | 11.30% |
| FTC133-p16 | (Q6UVK1) Chondroitin sulfate proteoglycan 4 precursor (Chondroitin sulfate proteoglycan NG2) (Melanoma chondroitin sulfate proteoglycan) (Melanoma-associated chondroitin sulfate proteoglycan) | CSPG4_HUMAN     | 250476 | 100% | 2  | 2  | 3  | 0.03% | 1.85%  |
| FTC133-p16 | (Q6UVK1) Chondroitin sulfate proteoglycan 4 precursor (Chondroitin sulfate proteoglycan NG2) (Melanoma chondroitin sulfate proteoglycan) (Melanoma-associated chondroitin sulfate proteoglycan) | CSPG4_HUMAN     | 250476 | 100% | 10 | 11 | 12 | 0.10% | 6.89%  |
| FTC133-p16 | (Q6UVK1) Chondroitin sulfate proteoglycan 4 precursor (Chondroitin sulfate proteoglycan NG2) (Melanoma chondroitin sulfate proteoglycan) (Melanoma-associated chondroitin sulfate proteoglycan) | CSPG4_HUMAN     | 250476 | 100% | 4  | 4  | 5  | 0.04% | 4.91%  |
| FTC133-p16 | (Q6UVK1) Chondroitin sulfate proteoglycan 4 precursor (Chondroitin sulfate proteoglycan NG2) (Melanoma chondroitin sulfate proteoglycan) (Melanoma-associated chondroitin sulfate proteoglycan) | CSPG4_HUMAN     | 250476 | 100% | 9  | 10 | 13 | 0.11% | 5.90%  |
| FTC133-p16 | (Q6UVK1) Chondroitin sulfate proteoglycan 4 precursor (Chondroitin sulfate proteoglycan NG2) (Melanoma chondroitin sulfate proteoglycan) (Melanoma-associated chondroitin sulfate proteoglycan) | CSPG4_HUMAN     | 250476 | 100% | 2  | 2  | 4  | 0.03% | 1.77%  |
| FTC133-p16 | (Q6UVK1) Chondroitin sulfate proteoglycan 4 precursor (Chondroitin sulfate proteoglycan NG2) (Melanoma chondroitin sulfate proteoglycan) (Melanoma-associated chondroitin sulfate proteoglycan) | CSPG4_HUMAN     | 250476 | 100% | 3  | 5  | 8  | 0.07% | 2.45%  |
| FTC133-p16 | (Q6UVK1) Chondroitin sulfate proteoglycan 4 precursor (Chondroitin sulfate proteoglycan NG2) (Melanoma chondroitin sulfate proteoglycan) (Melanoma-associated chondroitin sulfate proteoglycan) | CSPG4_HUMAN     | 250476 | 100% | 5  | 7  | 32 | 0.28% | 4.95%  |

|            |                                                                                                                                                                                                 |             |        |      |    |    |    |       |        |
|------------|-------------------------------------------------------------------------------------------------------------------------------------------------------------------------------------------------|-------------|--------|------|----|----|----|-------|--------|
| FTC133-p16 | (Q6UVK1) Chondroitin sulfate proteoglycan 4 precursor (Chondroitin sulfate proteoglycan NG2) (Melanoma chondroitin sulfate proteoglycan) (Melanoma-associated chondroitin sulfate proteoglycan) | CSPG4_HUMAN | 250476 | 100% | 28 | 34 | 55 | 0.51% | 18.00% |
| FTC133-p16 | (Q6UVK1) Chondroitin sulfate proteoglycan 4 precursor (Chondroitin sulfate proteoglycan NG2) (Melanoma chondroitin sulfate proteoglycan) (Melanoma-associated chondroitin sulfate proteoglycan) | CSPG4_HUMAN | 250476 | 100% | 24 | 26 | 38 | 0.42% | 16.10% |
| FTC133-p16 | (Q6UVK1) Chondroitin sulfate proteoglycan 4 precursor (Chondroitin sulfate proteoglycan NG2) (Melanoma chondroitin sulfate proteoglycan) (Melanoma-associated chondroitin sulfate proteoglycan) | CSPG4_HUMAN | 250476 | 100% | 18 | 24 | 28 | 0.33% | 12.50% |
| FTC133-p16 | (Q6UVK1) Chondroitin sulfate proteoglycan 4 precursor (Chondroitin sulfate proteoglycan NG2) (Melanoma chondroitin sulfate proteoglycan) (Melanoma-associated chondroitin sulfate proteoglycan) | CSPG4_HUMAN | 250476 | 100% | 19 | 20 | 33 | 0.39% | 11.80% |
| FTC133-p16 | (Q6UVK1) Chondroitin sulfate proteoglycan 4 precursor (Chondroitin sulfate proteoglycan NG2) (Melanoma chondroitin sulfate proteoglycan) (Melanoma-associated chondroitin sulfate proteoglycan) | CSPG4_HUMAN | 250476 | 100% | 8  | 8  | 15 | 0.22% | 7.32%  |
| FTC133-p16 | (Q6UVK1) Chondroitin sulfate proteoglycan 4 precursor (Chondroitin sulfate proteoglycan NG2) (Melanoma chondroitin sulfate proteoglycan) (Melanoma-associated chondroitin sulfate proteoglycan) | CSPG4_HUMAN | 250476 | 100% | 24 | 29 | 38 | 0.35% | 15.20% |
| FTC133-p16 | (Q8IYB3) Serine/arginine repetitive matrix protein 1 (Ser/Arg-related nuclear matrix protein) (SR-related nuclear matrix protein of 160 kDa) (SRm160)                                           | SRRM1_HUMAN | 102319 | 100% | 2  | 2  | 4  | 0.03% | 5.20%  |
| FTC133-p16 | (Q8IYB3) Serine/arginine repetitive matrix protein 1 (Ser/Arg-related nuclear matrix protein) (SR-related nuclear matrix protein of 160 kDa) (SRm160)                                           | SRRM1_HUMAN | 102319 | 100% | 2  | 3  | 8  | 0.07% | 5.20%  |
| FTC133-p16 | (Q8IYB3) Serine/arginine repetitive matrix protein 1 (Ser/Arg-related nuclear matrix protein) (SR-related nuclear matrix protein of 160 kDa) (SRm160)                                           | SRRM1_HUMAN | 102319 | 100% | 2  | 2  | 3  | 0.03% | 4.42%  |
| FTC133-p16 | (Q8IYB3) Serine/arginine repetitive matrix protein 1 (Ser/Arg-related nuclear matrix protein) (SR-related nuclear matrix protein of 160 kDa) (SRm160)                                           | SRRM1_HUMAN | 102319 | 100% | 4  | 4  | 5  | 0.05% | 8.41%  |
| FTC133-p16 | (Q8IYB3) Serine/arginine repetitive matrix protein 1 (Ser/Arg-related nuclear matrix protein) (SR-related nuclear matrix protein of 160 kDa) (SRm160)                                           | SRRM1_HUMAN | 102319 | 100% | 3  | 3  | 4  | 0.04% | 6.53%  |
| FTC133-p16 | (Q8IYB3) Serine/arginine repetitive matrix protein 1 (Ser/Arg-related nuclear matrix protein) (SR-related nuclear matrix protein of 160 kDa) (SRm160)                                           | SRRM1_HUMAN | 102319 | 100% | 3  | 4  | 7  | 0.08% | 3.98%  |

## Protein Identified Sequence Coverage in FTC-133

|            |                                                                                                                                                       |             |        |      |   |   |   |       |        |
|------------|-------------------------------------------------------------------------------------------------------------------------------------------------------|-------------|--------|------|---|---|---|-------|--------|
| FTC133-p16 | (Q8IYB3) Serine/arginine repetitive matrix protein 1 (Ser/Arg-related nuclear matrix protein) (SR-related nuclear matrix protein of 160 kDa) (SRm160) | SRRM1_HUMAN | 102319 | 100% | 2 | 2 | 6 | 0.07% | 2.77%  |
| FTC133-p16 | (Q8IYB3) Serine/arginine repetitive matrix protein 1 (Ser/Arg-related nuclear matrix protein) (SR-related nuclear matrix protein of 160 kDa) (SRm160) | SRRM1_HUMAN | 102319 | 100% | 2 | 3 | 6 | 0.06% | 4.65%  |
| FTC133-p16 | (Q8NB7) Sulfatase-modifying factor 2 precursor (C-alpha-formylglycine-generating enzyme 2)                                                            | SUMF2_HUMAN | 33839  | 100% | 3 | 3 | 5 | 0.05% | 14.00% |
| FTC133-p16 | (Q8NB7) Sulfatase-modifying factor 2 precursor (C-alpha-formylglycine-generating enzyme 2)                                                            | SUMF2_HUMAN | 33839  | 100% | 2 | 2 | 2 | 0.02% | 7.31%  |
| FTC133-p16 | (Q8NBS9) Thioredoxin domain-containing protein 5 precursor (Thioredoxin-like protein p46) (Endoplasmic reticulum protein ERp46)                       | TXND5_HUMAN | 47611  | 100% | 3 | 4 | 8 | 0.07% | 12.00% |
| FTC133-p16 | (Q8NBS9) Thioredoxin domain-containing protein 5 precursor (Thioredoxin-like protein p46) (Endoplasmic reticulum protein ERp46)                       | TXND5_HUMAN | 47611  | 100% | 5 | 6 | 9 | 0.08% | 16.90% |
| FTC133-p16 | (Q8NBS9) Thioredoxin domain-containing protein 5 precursor (Thioredoxin-like protein p46) (Endoplasmic reticulum protein ERp46)                       | TXND5_HUMAN | 47611  | 100% | 5 | 6 | 6 | 0.07% | 16.90% |
| FTC133-p16 | (Q8NBS9) Thioredoxin domain-containing protein 5 precursor (Thioredoxin-like protein p46) (Endoplasmic reticulum protein ERp46)                       | TXND5_HUMAN | 47611  | 100% | 3 | 3 | 3 | 0.04% | 10.60% |
| FTC133-p16 | (Q8NBS9) Thioredoxin domain-containing protein 5 precursor (Thioredoxin-like protein p46) (Endoplasmic reticulum protein ERp46)                       | TXND5_HUMAN | 47611  | 100% | 2 | 2 | 3 | 0.04% | 7.87%  |
| FTC133-p16 | (Q8NBS9) Thioredoxin domain-containing protein 5 precursor (Thioredoxin-like protein p46) (Endoplasmic reticulum protein ERp46)                       | TXND5_HUMAN | 47611  | 100% | 2 | 2 | 3 | 0.04% | 9.95%  |
| FTC133-p16 | (Q8NBS9) Thioredoxin domain-containing protein 5 precursor (Thioredoxin-like protein p46) (Endoplasmic reticulum protein ERp46)                       | TXND5_HUMAN | 47611  | 100% | 5 | 5 | 6 | 0.06% | 16.90% |
| FTC133-p16 | (Q8NBX0) Probable saccharopine dehydrogenase (EC 1.5.1.9)                                                                                             | SCPDH_HUMAN | 47135  | 100% | 3 | 3 | 6 | 0.05% | 20.00% |
| FTC133-p16 | (Q8NBX0) Probable saccharopine dehydrogenase (EC 1.5.1.9)                                                                                             | SCPDH_HUMAN | 47135  | 100% | 3 | 3 | 4 | 0.03% | 10.00% |
| FTC133-p16 | (Q8NBX0) Probable saccharopine dehydrogenase (EC 1.5.1.9)                                                                                             | SCPDH_HUMAN | 47135  | 100% | 2 | 2 | 6 | 0.05% | 13.30% |
| FTC133-p16 | (Q8NBX0) Probable saccharopine dehydrogenase (EC 1.5.1.9)                                                                                             | SCPDH_HUMAN | 47135  | 100% | 2 | 2 | 3 | 0.03% | 9.79%  |
| FTC133-p16 | (Q8NBX0) Probable saccharopine dehydrogenase (EC 1.5.1.9)                                                                                             | SCPDH_HUMAN | 47135  | 100% | 2 | 2 | 5 | 0.06% | 12.10% |
| FTC133-p16 | (Q8NBX0) Probable saccharopine dehydrogenase (EC 1.5.1.9)                                                                                             | SCPDH_HUMAN | 47135  | 100% | 4 | 4 | 6 | 0.06% | 21.90% |
| FTC133-p16 | (Q8TEA8) Probable D-tyrosyl-tRNA(Tyr) deacylase (EC 3.1.-.-)                                                                                          | DTD1_HUMAN  | 23406  | 100% | 2 | 2 | 3 | 0.03% | 20.10% |
| FTC133-p16 | (Q92520) Protein FAM3C precursor (Protein GS3786)                                                                                                     | FAM3C_HUMAN | 24663  | 100% | 2 | 2 | 2 | 0.02% | 14.10% |
| FTC133-p16 | (Q92520) Protein FAM3C precursor (Protein GS3786)                                                                                                     | FAM3C_HUMAN | 24663  | 100% | 2 | 2 | 6 | 0.05% | 15.40% |
| FTC133-p16 | (Q92520) Protein FAM3C precursor (Protein GS3786)                                                                                                     | FAM3C_HUMAN | 24663  | 100% | 2 | 2 | 3 | 0.03% | 13.20% |
| FTC133-p16 | (Q92520) Protein FAM3C precursor (Protein GS3786)                                                                                                     | FAM3C_HUMAN | 24663  | 100% | 2 | 2 | 2 | 0.02% | 13.20% |
| FTC133-p16 | (Q92520) Protein FAM3C precursor (Protein GS3786)                                                                                                     | FAM3C_HUMAN | 24663  | 100% | 2 | 2 | 2 | 0.02% | 11.00% |

Protein Identified Sequence Coverage in FTC-133

|            |                                                                                                                                                                       |             |        |      |   |   |     |       |        |
|------------|-----------------------------------------------------------------------------------------------------------------------------------------------------------------------|-------------|--------|------|---|---|-----|-------|--------|
| FTC133-p16 | (Q92688) Acidic leucine-rich nuclear phosphoprotein 32 family member B (PHAPI2 protein) (Silver-stainable protein SSP29) (Acidic protein rich in leucines)            | AN32B_HUMAN | 28771  | 100% | 2 | 2 | 4   | 0.04% | 9.56%  |
| FTC133-p16 | (Q92688) Acidic leucine-rich nuclear phosphoprotein 32 family member B (PHAPI2 protein) (Silver-stainable protein SSP29) (Acidic protein rich in leucines)            | AN32B_HUMAN | 28771  | 100% | 2 | 2 | 2   | 0.02% | 9.56%  |
| FTC133-p16 | (Q92688) Acidic leucine-rich nuclear phosphoprotein 32 family member B (PHAPI2 protein) (Silver-stainable protein SSP29) (Acidic protein rich in leucines)            | AN32B_HUMAN | 28771  | 100% | 2 | 2 | 3   | 0.04% | 9.56%  |
| FTC133-p16 | (Q92688) Acidic leucine-rich nuclear phosphoprotein 32 family member B (PHAPI2 protein) (Silver-stainable protein SSP29) (Acidic protein rich in leucines)            | AN32B_HUMAN | 28771  | 100% | 2 | 2 | 2   | 0.02% | 9.56%  |
| FTC133-p16 | (Q92692) Poliovirus receptor-related protein 2 precursor (Herpes virus entry mediator B) (HveB) (Nectin-2) (CD112 antigen)                                            | PVRL2_HUMAN | 57724  | 100% | 2 | 2 | 7   | 0.06% | 6.51%  |
| FTC133-p16 | (Q92692) Poliovirus receptor-related protein 2 precursor (Herpes virus entry mediator B) (HveB) (Nectin-2) (CD112 antigen)                                            | PVRL2_HUMAN | 57724  | 100% | 2 | 2 | 2   | 0.03% | 6.88%  |
| FTC133-p16 | (Q92820) Gamma-glutamyl hydrolase precursor (EC 3.4.19.9) (Gamma-Glu-X carboxypeptidase) (Conjugase) (GH)                                                             | GGH_HUMAN   | 35948  | 100% | 3 | 3 | 5   | 0.05% | 13.20% |
| FTC133-p16 | (Q92820) Gamma-glutamyl hydrolase precursor (EC 3.4.19.9) (Gamma-Glu-X carboxypeptidase) (Conjugase) (GH)                                                             | GGH_HUMAN   | 35948  | 100% | 2 | 3 | 3   | 0.03% | 8.49%  |
| FTC133-p16 | (Q92820) Gamma-glutamyl hydrolase precursor (EC 3.4.19.9) (Gamma-Glu-X carboxypeptidase) (Conjugase) (GH)                                                             | GGH_HUMAN   | 35948  | 100% | 2 | 2 | 4   | 0.04% | 8.49%  |
| FTC133-p16 | (Q92820) Gamma-glutamyl hydrolase precursor (EC 3.4.19.9) (Gamma-Glu-X carboxypeptidase) (Conjugase) (GH)                                                             | GGH_HUMAN   | 35948  | 100% | 3 | 4 | 4   | 0.04% | 13.20% |
| FTC133-p16 | (Q92820) Gamma-glutamyl hydrolase precursor (EC 3.4.19.9) (Gamma-Glu-X carboxypeptidase) (Conjugase) (GH)                                                             | GGH_HUMAN   | 35948  | 100% | 4 | 4 | 4   | 0.05% | 20.80% |
| FTC133-p16 | (Q92820) Gamma-glutamyl hydrolase precursor (EC 3.4.19.9) (Gamma-Glu-X carboxypeptidase) (Conjugase) (GH)                                                             | GGH_HUMAN   | 35948  | 100% | 4 | 4 | 5   | 0.06% | 19.80% |
| FTC133-p16 | (Q92820) Gamma-glutamyl hydrolase precursor (EC 3.4.19.9) (Gamma-Glu-X carboxypeptidase) (Conjugase) (GH)                                                             | GGH_HUMAN   | 35948  | 100% | 2 | 2 | 2   | 0.02% | 11.90% |
| FTC133-p16 | (Q92896) Golgi apparatus protein 1 precursor (Golgi sialoglycoprotein MG-160) (E-selectin ligand 1) (ESL-1) (Cysteine-rich fibroblast growth factor receptor) (CFR-1) | GSLG1_HUMAN | 134577 | 100% | 2 | 2 | 3   | 0.03% | 5.60%  |
| FTC133-p16 | (Q93079) Histone H2B.j (H2B/j)                                                                                                                                        | H2BJ_HUMAN  | 13743  | 100% | 2 | 2 | 6   | 0.06% | 19.20% |
| FTC133-p16 | (Q93079) Histone H2B.j (H2B/j)                                                                                                                                        | H2BJ_HUMAN  | 13743  | 100% | 2 | 3 | 142 | 1.20% | 19.20% |
| FTC133-p16 | (Q93079) Histone H2B.j (H2B/j)                                                                                                                                        | H2BJ_HUMAN  | 13743  | 100% | 2 | 3 | 14  | 0.12% | 19.20% |
| FTC133-p16 | (Q93079) Histone H2B.j (H2B/j)                                                                                                                                        | H2BJ_HUMAN  | 13743  | 100% | 3 | 4 | 33  | 0.30% | 27.20% |
| FTC133-p16 | (Q93079) Histone H2B.j (H2B/j)                                                                                                                                        | H2BJ_HUMAN  | 13743  | 100% | 2 | 2 | 28  | 0.31% | 19.20% |
| FTC133-p16 | (Q93079) Histone H2B.j (H2B/j)                                                                                                                                        | H2BJ_HUMAN  | 13743  | 100% | 4 | 4 | 36  | 0.42% | 36.00% |
| FTC133-p16 | (Q93079) Histone H2B.j (H2B/j)                                                                                                                                        | H2BJ_HUMAN  | 13743  | 100% | 2 | 3 | 35  | 0.41% | 20.00% |
| FTC133-p16 | (Q93079) Histone H2B.j (H2B/j)                                                                                                                                        | H2BJ_HUMAN  | 13743  | 100% | 3 | 3 | 34  | 0.31% | 27.20% |
| FTC133-p16 | (Q96AG4) Leucine-rich repeat-containing protein 59                                                                                                                    | LRC59_HUMAN | 34913  | 100% | 2 | 3 | 3   | 0.03% | 10.70% |

## Protein Identified Sequence Coverage in FTC-133

|            |                                                                                                                                                                                  |             |       |      |    |    |    |       |        |
|------------|----------------------------------------------------------------------------------------------------------------------------------------------------------------------------------|-------------|-------|------|----|----|----|-------|--------|
| FTC133-p16 | (Q96AG4) Leucine-rich repeat-containing protein 59                                                                                                                               | LRC59_HUMAN | 34913 | 100% | 3  | 3  | 5  | 0.05% | 14.30% |
| FTC133-p16 | (Q96AG4) Leucine-rich repeat-containing protein 59                                                                                                                               | LRC59_HUMAN | 34913 | 100% | 2  | 2  | 2  | 0.02% | 10.70% |
| FTC133-p16 | (Q96AG4) Leucine-rich repeat-containing protein 59                                                                                                                               | LRC59_HUMAN | 34913 | 100% | 3  | 3  | 3  | 0.04% | 18.90% |
| FTC133-p16 | (Q96AG4) Leucine-rich repeat-containing protein 59                                                                                                                               | LRC59_HUMAN | 34913 | 100% | 2  | 2  | 2  | 0.03% | 14.30% |
| FTC133-p16 | (Q96AG4) Leucine-rich repeat-containing protein 59                                                                                                                               | LRC59_HUMAN | 34913 | 100% | 4  | 4  | 5  | 0.05% | 19.50% |
| FTC133-p16 | (Q96AY3) FK506-binding protein 10 precursor (EC 5.2.1.8) (Peptidyl-prolyl cis-trans isomerase) (PPIase) (Rotamase) (65 kDa FK506-binding protein) (FKBP65) (Immunophilin FKBP65) | FKB10_HUMAN | 64228 | 100% | 2  | 2  | 2  | 0.02% | 6.53%  |
| FTC133-p16 | (Q96AY3) FK506-binding protein 10 precursor (EC 5.2.1.8) (Peptidyl-prolyl cis-trans isomerase) (PPIase) (Rotamase) (65 kDa FK506-binding protein) (FKBP65) (Immunophilin FKBP65) | FKB10_HUMAN | 64228 | 100% | 2  | 2  | 3  | 0.03% | 4.30%  |
| FTC133-p16 | (Q96AY3) FK506-binding protein 10 precursor (EC 5.2.1.8) (Peptidyl-prolyl cis-trans isomerase) (PPIase) (Rotamase) (65 kDa FK506-binding protein) (FKBP65) (Immunophilin FKBP65) | FKB10_HUMAN | 64228 | 100% | 2  | 2  | 3  | 0.04% | 4.64%  |
| FTC133-p16 | (Q96HE7) ERO1-like protein alpha precursor (EC 1.8.4.-) (ERO1-Lalpha) (Oxidoreductin-1-Lalpha) (Endoplasmic oxidoreductin-1-like protein) (ERO1-L)                               | ERO1A_HUMAN | 54377 | 100% | 2  | 2  | 3  | 0.03% | 9.83%  |
| FTC133-p16 | (Q96HE7) ERO1-like protein alpha precursor (EC 1.8.4.-) (ERO1-Lalpha) (Oxidoreductin-1-Lalpha) (Endoplasmic oxidoreductin-1-like protein) (ERO1-L)                               | ERO1A_HUMAN | 54377 | 100% | 4  | 6  | 9  | 0.08% | 13.70% |
| FTC133-p16 | (Q96HE7) ERO1-like protein alpha precursor (EC 1.8.4.-) (ERO1-Lalpha) (Oxidoreductin-1-Lalpha) (Endoplasmic oxidoreductin-1-like protein) (ERO1-L)                               | ERO1A_HUMAN | 54377 | 100% | 5  | 10 | 47 | 0.40% | 17.30% |
| FTC133-p16 | (Q96HE7) ERO1-like protein alpha precursor (EC 1.8.4.-) (ERO1-Lalpha) (Oxidoreductin-1-Lalpha) (Endoplasmic oxidoreductin-1-like protein) (ERO1-L)                               | ERO1A_HUMAN | 54377 | 100% | 5  | 5  | 15 | 0.13% | 15.20% |
| FTC133-p16 | (Q96HE7) ERO1-like protein alpha precursor (EC 1.8.4.-) (ERO1-Lalpha) (Oxidoreductin-1-Lalpha) (Endoplasmic oxidoreductin-1-like protein) (ERO1-L)                               | ERO1A_HUMAN | 54377 | 100% | 3  | 4  | 13 | 0.11% | 13.50% |
| FTC133-p16 | (Q96HE7) ERO1-like protein alpha precursor (EC 1.8.4.-) (ERO1-Lalpha) (Oxidoreductin-1-Lalpha) (Endoplasmic oxidoreductin-1-like protein) (ERO1-L)                               | ERO1A_HUMAN | 54377 | 100% | 3  | 5  | 8  | 0.07% | 9.40%  |
| FTC133-p16 | (Q96HE7) ERO1-like protein alpha precursor (EC 1.8.4.-) (ERO1-Lalpha) (Oxidoreductin-1-Lalpha) (Endoplasmic oxidoreductin-1-like protein) (ERO1-L)                               | ERO1A_HUMAN | 54377 | 100% | 16 | 19 | 37 | 0.34% | 44.00% |
| FTC133-p16 | (Q96HE7) ERO1-like protein alpha precursor (EC 1.8.4.-) (ERO1-Lalpha) (Oxidoreductin-1-Lalpha) (Endoplasmic oxidoreductin-1-like protein) (ERO1-L)                               | ERO1A_HUMAN | 54377 | 100% | 14 | 19 | 39 | 0.43% | 41.00% |

## Protein Identified Sequence Coverage in FTC-133

|            |                                                                                                                                                                                                                  |             |       |      |    |    |    |       |        |
|------------|------------------------------------------------------------------------------------------------------------------------------------------------------------------------------------------------------------------|-------------|-------|------|----|----|----|-------|--------|
| FTC133-p16 | (Q96HE7) ERO1-like protein alpha precursor (EC 1.8.4.-) (ERO1-Lalpha) (Oxidoreductin-1-Lalpha) (Endoplasmic oxidoreductin-1-like protein) (ERO1-L)                                                               | ERO1A_HUMAN | 54377 | 100% | 13 | 18 | 33 | 0.39% | 35.30% |
| FTC133-p16 | (Q96HE7) ERO1-like protein alpha precursor (EC 1.8.4.-) (ERO1-Lalpha) (Oxidoreductin-1-Lalpha) (Endoplasmic oxidoreductin-1-like protein) (ERO1-L)                                                               | ERO1A_HUMAN | 54377 | 100% | 12 | 14 | 26 | 0.30% | 31.20% |
| FTC133-p16 | (Q96HE7) ERO1-like protein alpha precursor (EC 1.8.4.-) (ERO1-Lalpha) (Oxidoreductin-1-Lalpha) (Endoplasmic oxidoreductin-1-like protein) (ERO1-L)                                                               | ERO1A_HUMAN | 54377 | 100% | 7  | 7  | 10 | 0.14% | 32.10% |
| FTC133-p16 | (Q96HE7) ERO1-like protein alpha precursor (EC 1.8.4.-) (ERO1-Lalpha) (Oxidoreductin-1-Lalpha) (Endoplasmic oxidoreductin-1-like protein) (ERO1-L)                                                               | ERO1A_HUMAN | 54377 | 100% | 17 | 22 | 47 | 0.43% | 46.20% |
| FTC133-p16 | (Q96PD2) Discoidin, CUB and LCCL domain-containing protein 2 precursor (Endothelial and smooth muscle cell-derived neuropilin-like protein) (CUB, LCCL and coagulation factor V/VIII-homology domains protein 1) | DCBD2_HUMAN | 85018 | 100% | 4  | 4  | 5  | 0.04% | 12.40% |
| FTC133-p16 | (Q99519) Sialidase-1 precursor (EC 3.2.1.18) (Lysosomal sialidase) (N-acetyl-alpha-neuraminidase 1) (Acetylneuraminyl hydrolase) (G9 sialidase)                                                                  | NEUR1_HUMAN | 45449 | 100% | 2  | 3  | 6  | 0.05% | 12.50% |
| FTC133-p16 | (Q99519) Sialidase-1 precursor (EC 3.2.1.18) (Lysosomal sialidase) (N-acetyl-alpha-neuraminidase 1) (Acetylneuraminyl hydrolase) (G9 sialidase)                                                                  | NEUR1_HUMAN | 45449 | 100% | 2  | 2  | 6  | 0.05% | 17.80% |
| FTC133-p16 | (Q99519) Sialidase-1 precursor (EC 3.2.1.18) (Lysosomal sialidase) (N-acetyl-alpha-neuraminidase 1) (Acetylneuraminyl hydrolase) (G9 sialidase)                                                                  | NEUR1_HUMAN | 45449 | 100% | 6  | 7  | 12 | 0.11% | 23.10% |
| FTC133-p16 | (Q99519) Sialidase-1 precursor (EC 3.2.1.18) (Lysosomal sialidase) (N-acetyl-alpha-neuraminidase 1) (Acetylneuraminyl hydrolase) (G9 sialidase)                                                                  | NEUR1_HUMAN | 45449 | 100% | 3  | 3  | 4  | 0.04% | 14.90% |
| FTC133-p16 | (Q99519) Sialidase-1 precursor (EC 3.2.1.18) (Lysosomal sialidase) (N-acetyl-alpha-neuraminidase 1) (Acetylneuraminyl hydrolase) (G9 sialidase)                                                                  | NEUR1_HUMAN | 45449 | 100% | 2  | 2  | 2  | 0.02% | 12.50% |
| FTC133-p16 | (Q99519) Sialidase-1 precursor (EC 3.2.1.18) (Lysosomal sialidase) (N-acetyl-alpha-neuraminidase 1) (Acetylneuraminyl hydrolase) (G9 sialidase)                                                                  | NEUR1_HUMAN | 45449 | 100% | 2  | 2  | 2  | 0.02% | 6.27%  |
| FTC133-p16 | (Q99519) Sialidase-1 precursor (EC 3.2.1.18) (Lysosomal sialidase) (N-acetyl-alpha-neuraminidase 1) (Acetylneuraminyl hydrolase) (G9 sialidase)                                                                  | NEUR1_HUMAN | 45449 | 100% | 2  | 2  | 3  | 0.04% | 14.70% |
| FTC133-p16 | (Q99519) Sialidase-1 precursor (EC 3.2.1.18) (Lysosomal sialidase) (N-acetyl-alpha-neuraminidase 1) (Acetylneuraminyl hydrolase) (G9 sialidase)                                                                  | NEUR1_HUMAN | 45449 | 100% | 3  | 3  | 5  | 0.05% | 9.40%  |

Protein Identified Sequence Coverage in FTC-133

|            |                                                                                                                                                                                                                                                     |             |        |      |   |   |    |       |        |
|------------|-----------------------------------------------------------------------------------------------------------------------------------------------------------------------------------------------------------------------------------------------------|-------------|--------|------|---|---|----|-------|--------|
| FTC133-p16 | (Q99714) 3-hydroxyacyl-CoA dehydrogenase type-2 (EC 1.1.1.35) (3-hydroxyacyl-CoA dehydrogenase type II) (Type II HADH) (3-hydroxy-2-methylbutyryl-CoA dehydrogenase) (EC 1.1.1.178) (Endoplasmic reticulum-associated amyloid beta-peptide binding) | HCD2_HUMAN  | 26774  | 100% | 2 | 2 | 2  | 0.02% | 12.30% |
| FTC133-p16 | (Q99733) Nucleosome assembly protein 1-like 4 (Nucleosome assembly protein 2) (NAP2)                                                                                                                                                                | NP1L4_HUMAN | 42806  | 100% | 2 | 2 | 2  | 0.02% | 12.00% |
| FTC133-p16 | (Q99733) Nucleosome assembly protein 1-like 4 (Nucleosome assembly protein 2) (NAP2)                                                                                                                                                                | NP1L4_HUMAN | 42806  | 100% | 3 | 3 | 3  | 0.03% | 16.00% |
| FTC133-p16 | (Q99733) Nucleosome assembly protein 1-like 4 (Nucleosome assembly protein 2) (NAP2)                                                                                                                                                                | NP1L4_HUMAN | 42806  | 100% | 3 | 3 | 3  | 0.04% | 13.30% |
| FTC133-p16 | (Q99733) Nucleosome assembly protein 1-like 4 (Nucleosome assembly protein 2) (NAP2)                                                                                                                                                                | NP1L4_HUMAN | 42806  | 100% | 2 | 2 | 4  | 0.05% | 11.20% |
| FTC133-p16 | (Q9BS26) Thioredoxin domain-containing protein 4 precursor (Endoplasmic reticulum resident protein ERp44)                                                                                                                                           | TXND4_HUMAN | 46955  | 100% | 3 | 3 | 3  | 0.03% | 8.13%  |
| FTC133-p16 | (Q9BS26) Thioredoxin domain-containing protein 4 precursor (Endoplasmic reticulum resident protein ERp44)                                                                                                                                           | TXND4_HUMAN | 46955  | 100% | 3 | 3 | 10 | 0.09% | 19.00% |
| FTC133-p16 | (Q9BS26) Thioredoxin domain-containing protein 4 precursor (Endoplasmic reticulum resident protein ERp44)                                                                                                                                           | TXND4_HUMAN | 46955  | 100% | 8 | 9 | 12 | 0.11% | 32.80% |
| FTC133-p16 | (Q9BS26) Thioredoxin domain-containing protein 4 precursor (Endoplasmic reticulum resident protein ERp44)                                                                                                                                           | TXND4_HUMAN | 46955  | 100% | 6 | 6 | 8  | 0.09% | 28.60% |
| FTC133-p16 | (Q9BS26) Thioredoxin domain-containing protein 4 precursor (Endoplasmic reticulum resident protein ERp44)                                                                                                                                           | TXND4_HUMAN | 46955  | 100% | 4 | 4 | 6  | 0.07% | 22.70% |
| FTC133-p16 | (Q9BS26) Thioredoxin domain-containing protein 4 precursor (Endoplasmic reticulum resident protein ERp44)                                                                                                                                           | TXND4_HUMAN | 46955  | 100% | 3 | 3 | 4  | 0.05% | 11.60% |
| FTC133-p16 | (Q9BS26) Thioredoxin domain-containing protein 4 precursor (Endoplasmic reticulum resident protein ERp44)                                                                                                                                           | TXND4_HUMAN | 46955  | 100% | 7 | 7 | 9  | 0.08% | 26.60% |
| FTC133-p16 | (Q9BVK6) Transmembrane emp24 domain-containing protein 9 precursor (Glycoprotein 25L2)                                                                                                                                                              | TMED9_HUMAN | 25087  | 100% | 2 | 2 | 2  | 0.02% | 13.10% |
| FTC133-p16 | (Q9HB71) Calcyclin-binding protein (CacyBP) (hCacyBP) (Siah-interacting protein) (S100A6-binding protein)                                                                                                                                           | CYBP_HUMAN  | 26192  | 100% | 3 | 3 | 4  | 0.06% | 28.10% |
| FTC133-p16 | (Q9NQC3) Reticulon-4 (Neurite outgrowth inhibitor) (Nogo protein) (Foccen) (Neuroendocrine-specific protein) (NSP) (Neuroendocrine-specific protein C homolog) (RTN-x) (Reticulon-5)                                                                | RTN4_HUMAN  | 129917 | 100% | 3 | 4 | 7  | 0.06% | 5.20%  |
| FTC133-p16 | (Q9NQC3) Reticulon-4 (Neurite outgrowth inhibitor) (Nogo protein) (Foccen) (Neuroendocrine-specific protein) (NSP) (Neuroendocrine-specific protein C homolog) (RTN-x) (Reticulon-5)                                                                | RTN4_HUMAN  | 129917 | 100% | 7 | 9 | 19 | 0.17% | 13.30% |
| FTC133-p16 | (Q9NQC3) Reticulon-4 (Neurite outgrowth inhibitor) (Nogo protein) (Foccen) (Neuroendocrine-specific protein) (NSP) (Neuroendocrine-specific protein C homolog) (RTN-x) (Reticulon-5)                                                                | RTN4_HUMAN  | 129917 | 100% | 7 | 9 | 18 | 0.20% | 13.30% |



Protein Identified Sequence Coverage in FTC-133

|            |                                                                                                                                                                                                                    |             |        |      |   |   |    |       |        |
|------------|--------------------------------------------------------------------------------------------------------------------------------------------------------------------------------------------------------------------|-------------|--------|------|---|---|----|-------|--------|
| FTC133-p16 | (Q9NQC3) Reticulon-4 (Neurite outgrowth inhibitor) (Nogo protein) (Foocen) (Neuroendocrine-specific protein) (NSP) (Neuroendocrine-specific protein C homolog) (RTN-x) (Reticulon-5)                               | RTN4_HUMAN  | 129917 | 100% | 4 | 5 | 9  | 0.11% | 10.30% |
| FTC133-p16 | (Q9NQC3) Reticulon-4 (Neurite outgrowth inhibitor) (Nogo protein) (Foocen) (Neuroendocrine-specific protein) (NSP) (Neuroendocrine-specific protein C homolog) (RTN-x) (Reticulon-5)                               | RTN4_HUMAN  | 129917 | 100% | 3 | 3 | 4  | 0.06% | 8.98%  |
| FTC133-p16 | (Q9NQC3) Reticulon-4 (Neurite outgrowth inhibitor) (Nogo protein) (Foocen) (Neuroendocrine-specific protein) (NSP) (Neuroendocrine-specific protein C homolog) (RTN-x) (Reticulon-5)                               | RTN4_HUMAN  | 129917 | 100% | 6 | 8 | 28 | 0.26% | 12.60% |
| FTC133-p16 | (Q9NS69) Mitochondrial import receptor subunit TOM22 homolog (Translocase of outer membrane 22 kDa subunit homolog) (hTom22) (1C9-2)                                                                               | TOM22_HUMAN | 15373  | 100% | 2 | 4 | 4  | 0.03% | 17.70% |
| FTC133-p16 | (Q9NS69) Mitochondrial import receptor subunit TOM22 homolog (Translocase of outer membrane 22 kDa subunit homolog) (hTom22) (1C9-2)                                                                               | TOM22_HUMAN | 15373  | 100% | 2 | 2 | 3  | 0.03% | 16.30% |
| FTC133-p16 | (Q9NS69) Mitochondrial import receptor subunit TOM22 homolog (Translocase of outer membrane 22 kDa subunit homolog) (hTom22) (1C9-2)                                                                               | TOM22_HUMAN | 15373  | 100% | 2 | 2 | 3  | 0.03% | 25.50% |
| FTC133-p16 | (Q9NS69) Mitochondrial import receptor subunit TOM22 homolog (Translocase of outer membrane 22 kDa subunit homolog) (hTom22) (1C9-2)                                                                               | TOM22_HUMAN | 15373  | 100% | 2 | 2 | 3  | 0.04% | 17.70% |
| FTC133-p16 | (Q9NYL9) Tropomodulin-3 (Ubiquitous tropomodulin) (U-Tmod)                                                                                                                                                         | TMOD3_HUMAN | 39578  | 100% | 2 | 2 | 2  | 0.02% | 8.52%  |
| FTC133-p16 | (Q9P0L0) Vesicle-associated membrane protein-associated protein A (VAMP-associated protein A) (VAMP-A) (VAP-A) (33 kDa Vamp-associated protein) (VAP-33)                                                           | VAPA_HUMAN  | 27300  | 100% | 2 | 3 | 3  | 0.03% | 11.60% |
| FTC133-p16 | (Q9P0L0) Vesicle-associated membrane protein-associated protein A (VAMP-associated protein A) (VAMP-A) (VAP-A) (33 kDa Vamp-associated protein) (VAP-33)                                                           | VAPA_HUMAN  | 27300  | 100% | 2 | 2 | 3  | 0.04% | 11.60% |
| FTC133-p16 | (Q9P2B2) Prostaglandin F2 receptor negative regulator precursor (Prostaglandin F2-alpha receptor regulatory protein) (Prostaglandin F2-alpha receptor-associated protein) (CD9 partner 1) (CD9P-1) (CD315 antigen) | FPRP_HUMAN  | 98538  | 100% | 2 | 2 | 2  | 0.02% | 3.07%  |
| FTC133-p16 | (Q9UBG0) Macrophage mannose receptor 2 precursor (Urokinase receptor-associated protein) (Endocytic receptor 180) (CD280 antigen)                                                                                  | MRC2_HUMAN  | 166637 | 100% | 4 | 4 | 6  | 0.05% | 4.73%  |
| FTC133-p16 | (Q9UBG0) Macrophage mannose receptor 2 precursor (Urokinase receptor-associated protein) (Endocytic receptor 180) (CD280 antigen)                                                                                  | MRC2_HUMAN  | 166637 | 100% | 3 | 3 | 7  | 0.06% | 4.94%  |

## Protein Identified Sequence Coverage in FTC-133

|            |                                                                                                                                                                                         |             |        |      |   |   |    |       |        |
|------------|-----------------------------------------------------------------------------------------------------------------------------------------------------------------------------------------|-------------|--------|------|---|---|----|-------|--------|
| FTC133-p16 | (Q9UBG0) Macrophage mannose receptor 2 precursor (Urokinase receptor-associated protein) (Endocytic receptor 180) (CD280 antigen)                                                       | MRC2_HUMAN  | 166637 | 100% | 5 | 5 | 8  | 0.07% | 6.96%  |
| FTC133-p16 | (Q9UBG0) Macrophage mannose receptor 2 precursor (Urokinase receptor-associated protein) (Endocytic receptor 180) (CD280 antigen)                                                       | MRC2_HUMAN  | 166637 | 100% | 4 | 4 | 4  | 0.04% | 5.54%  |
| FTC133-p16 | (Q9UBG0) Macrophage mannose receptor 2 precursor (Urokinase receptor-associated protein) (Endocytic receptor 180) (CD280 antigen)                                                       | MRC2_HUMAN  | 166637 | 100% | 4 | 4 | 4  | 0.05% | 6.15%  |
| FTC133-p16 | (Q9UBG0) Macrophage mannose receptor 2 precursor (Urokinase receptor-associated protein) (Endocytic receptor 180) (CD280 antigen)                                                       | MRC2_HUMAN  | 166637 | 100% | 2 | 2 | 4  | 0.05% | 1.83%  |
| FTC133-p16 | (Q9UBG0) Macrophage mannose receptor 2 precursor (Urokinase receptor-associated protein) (Endocytic receptor 180) (CD280 antigen)                                                       | MRC2_HUMAN  | 166637 | 100% | 5 | 5 | 7  | 0.10% | 8.59%  |
| FTC133-p16 | (Q9UBG0) Macrophage mannose receptor 2 precursor (Urokinase receptor-associated protein) (Endocytic receptor 180) (CD280 antigen)                                                       | MRC2_HUMAN  | 166637 | 100% | 2 | 2 | 2  | 0.02% | 1.83%  |
| FTC133-p16 | (Q9UBR2) Cathepsin Z precursor (EC 3.4.22.-) (Cathepsin X) (Cathepsin P)                                                                                                                | CATZ_HUMAN  | 33850  | 100% | 2 | 2 | 6  | 0.05% | 7.26%  |
| FTC133-p16 | (Q9UBR2) Cathepsin Z precursor (EC 3.4.22.-) (Cathepsin X) (Cathepsin P)                                                                                                                | CATZ_HUMAN  | 33850  | 100% | 2 | 2 | 3  | 0.03% | 11.90% |
| FTC133-p16 | (Q9UBR2) Cathepsin Z precursor (EC 3.4.22.-) (Cathepsin X) (Cathepsin P)                                                                                                                | CATZ_HUMAN  | 33850  | 100% | 2 | 3 | 4  | 0.04% | 10.90% |
| FTC133-p16 | (Q9UBR2) Cathepsin Z precursor (EC 3.4.22.-) (Cathepsin X) (Cathepsin P)                                                                                                                | CATZ_HUMAN  | 33850  | 100% | 2 | 2 | 3  | 0.03% | 9.24%  |
| FTC133-p16 | (Q9UBR2) Cathepsin Z precursor (EC 3.4.22.-) (Cathepsin X) (Cathepsin P)                                                                                                                | CATZ_HUMAN  | 33850  | 100% | 2 | 2 | 15 | 0.14% | 9.24%  |
| FTC133-p16 | (Q9UBS4) DnaJ homolog subfamily B member 11 precursor (ER-associated dnaJ protein 3) (ErJ3) (ER-associated Hsp40 co-chaperone) (hdj9) (PWP1-interacting protein 4)                      | DNJBB_HUMAN | 40497  | 100% | 2 | 2 | 2  | 0.02% | 7.54%  |
| FTC133-p16 | (Q9UBS4) DnaJ homolog subfamily B member 11 precursor (ER-associated dnaJ protein 3) (ErJ3) (ER-associated Hsp40 co-chaperone) (hdj9) (PWP1-interacting protein 4)                      | DNJBB_HUMAN | 40497  | 100% | 2 | 2 | 2  | 0.02% | 10.90% |
| FTC133-p16 | (Q9UHG3) Prenylcysteine oxidase precursor (EC 1.8.3.5) (PCL1)                                                                                                                           | PCYOX_HUMAN | 56595  | 100% | 3 | 3 | 9  | 0.08% | 7.72%  |
| FTC133-p16 | (Q9UHG3) Prenylcysteine oxidase precursor (EC 1.8.3.5) (PCL1)                                                                                                                           | PCYOX_HUMAN | 56595  | 100% | 4 | 4 | 6  | 0.06% | 10.30% |
| FTC133-p16 | (Q9UHG3) Prenylcysteine oxidase precursor (EC 1.8.3.5) (PCL1)                                                                                                                           | PCYOX_HUMAN | 56595  | 100% | 3 | 3 | 3  | 0.03% | 7.52%  |
| FTC133-p16 | (Q9UHG3) Prenylcysteine oxidase precursor (EC 1.8.3.5) (PCL1)                                                                                                                           | PCYOX_HUMAN | 56595  | 100% | 3 | 3 | 3  | 0.04% | 7.92%  |
| FTC133-p16 | (Q9UHG3) Prenylcysteine oxidase precursor (EC 1.8.3.5) (PCL1)                                                                                                                           | PCYOX_HUMAN | 56595  | 100% | 3 | 3 | 3  | 0.03% | 8.51%  |
| FTC133-p16 | (Q9UHL4) Dipeptidyl-peptidase 2 precursor (EC 3.4.14.2) (Dipeptidyl-peptidase II) (DPP II) (Dipeptidyl aminopeptidase II) (Quiescent cell proline dipeptidase) (Dipeptidyl peptidase 7) | DPP2_HUMAN  | 54311  | 100% | 2 | 2 | 2  | 0.02% | 6.50%  |

Protein Identified Sequence Coverage in FTC-133

|            |                                                                                                                                                                                                            |             |       |      |   |   |    |       |        |
|------------|------------------------------------------------------------------------------------------------------------------------------------------------------------------------------------------------------------|-------------|-------|------|---|---|----|-------|--------|
| FTC133-p16 | (Q9UJZ1) Stomatin-like protein 2 (SLP-2) (EPB72-like 2)                                                                                                                                                    | STML2_HUMAN | 38517 | 100% | 2 | 2 | 2  | 0.02% | 13.20% |
| FTC133-p16 | (Q9UJZ1) Stomatin-like protein 2 (SLP-2) (EPB72-like 2)                                                                                                                                                    | STML2_HUMAN | 38517 | 100% | 6 | 7 | 10 | 0.08% | 34.00% |
| FTC133-p16 | (Q9UJZ1) Stomatin-like protein 2 (SLP-2) (EPB72-like 2)                                                                                                                                                    | STML2_HUMAN | 38517 | 100% | 4 | 4 | 9  | 0.08% | 18.30% |
| FTC133-p16 | (Q9UJZ1) Stomatin-like protein 2 (SLP-2) (EPB72-like 2)                                                                                                                                                    | STML2_HUMAN | 38517 | 100% | 2 | 2 | 3  | 0.03% | 8.99%  |
| FTC133-p16 | (Q9UJZ1) Stomatin-like protein 2 (SLP-2) (EPB72-like 2)                                                                                                                                                    | STML2_HUMAN | 38517 | 100% | 3 | 3 | 3  | 0.04% | 13.80% |
| FTC133-p16 | (Q9UJZ1) Stomatin-like protein 2 (SLP-2) (EPB72-like 2)                                                                                                                                                    | STML2_HUMAN | 38517 | 100% | 2 | 2 | 2  | 0.02% | 9.55%  |
| FTC133-p16 | (Q9UL46) Proteasome activator complex subunit 2 (Proteasome activator 28-beta subunit) (PA28beta) (PA28b) (Activator of multicatalytic protease subunit 2) (11S regulator complex beta subunit) (REG-beta) | PSME2_HUMAN | 27213 | 100% | 3 | 3 | 4  | 0.03% | 15.10% |
| FTC133-p16 | (Q9UL46) Proteasome activator complex subunit 2 (Proteasome activator 28-beta subunit) (PA28beta) (PA28b) (Activator of multicatalytic protease subunit 2) (11S regulator complex beta subunit) (REG-beta) | PSME2_HUMAN | 27213 | 100% | 2 | 4 | 19 | 0.16% | 14.70% |
| FTC133-p16 | (Q9UL46) Proteasome activator complex subunit 2 (Proteasome activator 28-beta subunit) (PA28beta) (PA28b) (Activator of multicatalytic protease subunit 2) (11S regulator complex beta subunit) (REG-beta) | PSME2_HUMAN | 27213 | 100% | 2 | 3 | 3  | 0.03% | 14.70% |
| FTC133-p16 | (Q9UL46) Proteasome activator complex subunit 2 (Proteasome activator 28-beta subunit) (PA28beta) (PA28b) (Activator of multicatalytic protease subunit 2) (11S regulator complex beta subunit) (REG-beta) | PSME2_HUMAN | 27213 | 100% | 3 | 4 | 9  | 0.08% | 22.30% |
| FTC133-p16 | (Q9UL46) Proteasome activator complex subunit 2 (Proteasome activator 28-beta subunit) (PA28beta) (PA28b) (Activator of multicatalytic protease subunit 2) (11S regulator complex beta subunit) (REG-beta) | PSME2_HUMAN | 27213 | 100% | 3 | 4 | 6  | 0.07% | 21.40% |
| FTC133-p16 | (Q9UL46) Proteasome activator complex subunit 2 (Proteasome activator 28-beta subunit) (PA28beta) (PA28b) (Activator of multicatalytic protease subunit 2) (11S regulator complex beta subunit) (REG-beta) | PSME2_HUMAN | 27213 | 100% | 5 | 6 | 8  | 0.09% | 34.50% |
| FTC133-p16 | (Q9UL46) Proteasome activator complex subunit 2 (Proteasome activator 28-beta subunit) (PA28beta) (PA28b) (Activator of multicatalytic protease subunit 2) (11S regulator complex beta subunit) (REG-beta) | PSME2_HUMAN | 27213 | 100% | 4 | 5 | 6  | 0.07% | 31.50% |
| FTC133-p16 | (Q9UL46) Proteasome activator complex subunit 2 (Proteasome activator 28-beta subunit) (PA28beta) (PA28b) (Activator of multicatalytic protease subunit 2) (11S regulator complex beta subunit) (REG-beta) | PSME2_HUMAN | 27213 | 100% | 4 | 6 | 8  | 0.07% | 24.40% |
| FTC133-p16 | (Q9UM22) Mammalian ependymin-related protein 1 precursor (MERP-1) (UCC1 protein)                                                                                                                           | EPDR1_HUMAN | 25420 | 100% | 2 | 2 | 3  | 0.03% | 10.70% |
| FTC133-p16 | (Q9UM22) Mammalian ependymin-related protein 1 precursor (MERP-1) (UCC1 protein)                                                                                                                           | EPDR1_HUMAN | 25420 | 100% | 3 | 3 | 5  | 0.05% | 14.30% |

## Protein Identified Sequence Coverage in FTC-133

|            |                                                                                                                        |             |        |      |    |    |    |       |        |
|------------|------------------------------------------------------------------------------------------------------------------------|-------------|--------|------|----|----|----|-------|--------|
| FTC133-p16 | (Q9UM22) Mammalian ependymin-related protein 1 precursor (MERP-1) (UCC1 protein)                                       | EPDR1_HUMAN | 25420  | 100% | 3  | 3  | 3  | 0.03% | 14.30% |
| FTC133-p16 | (Q9UM22) Mammalian ependymin-related protein 1 precursor (MERP-1) (UCC1 protein)                                       | EPDR1_HUMAN | 25420  | 100% | 2  | 2  | 3  | 0.04% | 8.93%  |
| FTC133-p16 | (Q9UM22) Mammalian ependymin-related protein 1 precursor (MERP-1) (UCC1 protein)                                       | EPDR1_HUMAN | 25420  | 100% | 3  | 3  | 4  | 0.04% | 14.30% |
| FTC133-p16 | (Q9UMX5) Neudesin precursor (Neuron-derived neurotrophic factor) (Secreted protein of unknown function) (SPUF protein) | NENF_HUMAN  | 18839  | 100% | 3  | 3  | 6  | 0.06% | 22.10% |
| FTC133-p16 | (Q9UMX5) Neudesin precursor (Neuron-derived neurotrophic factor) (Secreted protein of unknown function) (SPUF protein) | NENF_HUMAN  | 18839  | 100% | 3  | 3  | 3  | 0.03% | 22.10% |
| FTC133-p16 | (Q9UMX5) Neudesin precursor (Neuron-derived neurotrophic factor) (Secreted protein of unknown function) (SPUF protein) | NENF_HUMAN  | 18839  | 100% | 2  | 2  | 2  | 0.02% | 16.90% |
| FTC133-p16 | (Q9UMX5) Neudesin precursor (Neuron-derived neurotrophic factor) (Secreted protein of unknown function) (SPUF protein) | NENF_HUMAN  | 18839  | 100% | 2  | 2  | 3  | 0.04% | 16.90% |
| FTC133-p16 | (Q9UMX5) Neudesin precursor (Neuron-derived neurotrophic factor) (Secreted protein of unknown function) (SPUF protein) | NENF_HUMAN  | 18839  | 100% | 3  | 3  | 3  | 0.03% | 22.10% |
| FTC133-p16 | (Q9Y224) Protein C14orf166                                                                                             | CN166_HUMAN | 28051  | 100% | 4  | 4  | 4  | 0.03% | 22.10% |
| FTC133-p16 | (Q9Y224) Protein C14orf166                                                                                             | CN166_HUMAN | 28051  | 100% | 2  | 3  | 6  | 0.05% | 12.30% |
| FTC133-p16 | (Q9Y224) Protein C14orf166                                                                                             | CN166_HUMAN | 28051  | 100% | 6  | 7  | 11 | 0.10% | 36.10% |
| FTC133-p16 | (Q9Y224) Protein C14orf166                                                                                             | CN166_HUMAN | 28051  | 100% | 4  | 5  | 9  | 0.10% | 27.00% |
| FTC133-p16 | (Q9Y224) Protein C14orf166                                                                                             | CN166_HUMAN | 28051  | 100% | 4  | 5  | 8  | 0.09% | 27.00% |
| FTC133-p16 | (Q9Y224) Protein C14orf166                                                                                             | CN166_HUMAN | 28051  | 100% | 5  | 5  | 8  | 0.09% | 32.40% |
| FTC133-p16 | (Q9Y224) Protein C14orf166                                                                                             | CN166_HUMAN | 28051  | 100% | 6  | 7  | 13 | 0.12% | 36.10% |
| FTC133-p16 | (Q9Y2B0) MIR-interacting saposin-like protein precursor (Transmembrane protein 4) (Putative secreted protein ZSIG9)    | MSAP_HUMAN  | 20635  | 100% | 2  | 2  | 2  | 0.02% | 17.00% |
| FTC133-p16 | (Q9Y383) Putative RNA-binding protein Luc7-like 2                                                                      | LC7L2_HUMAN | 46497  | 100% | 3  | 3  | 3  | 0.03% | 8.67%  |
| FTC133-p16 | (Q9Y490) Talin-1                                                                                                       | TLN1_HUMAN  | 269747 | 100% | 5  | 7  | 10 | 0.08% | 4.92%  |
| FTC133-p16 | (Q9Y490) Talin-1                                                                                                       | TLN1_HUMAN  | 269747 | 100% | 2  | 2  | 4  | 0.06% | 1.69%  |
| FTC133-p16 | (Q9Y4L1) 150 kDa oxygen-regulated protein precursor (Orp150) (Hypoxia up-regulated 1)                                  | OXR_P_HUMAN | 111319 | 100% | 3  | 3  | 5  | 0.04% | 8.71%  |
| FTC133-p16 | (Q9Y4L1) 150 kDa oxygen-regulated protein precursor (Orp150) (Hypoxia up-regulated 1)                                  | OXR_P_HUMAN | 111319 | 100% | 2  | 2  | 4  | 0.04% | 2.00%  |
| FTC133-p16 | (Q9Y4L1) 150 kDa oxygen-regulated protein precursor (Orp150) (Hypoxia up-regulated 1)                                  | OXR_P_HUMAN | 111319 | 100% | 2  | 2  | 3  | 0.03% | 2.70%  |
| FTC133-p16 | (Q9Y4L1) 150 kDa oxygen-regulated protein precursor (Orp150) (Hypoxia up-regulated 1)                                  | OXR_P_HUMAN | 111319 | 100% | 6  | 9  | 14 | 0.12% | 12.50% |
| FTC133-p16 | (Q9Y4L1) 150 kDa oxygen-regulated protein precursor (Orp150) (Hypoxia up-regulated 1)                                  | OXR_P_HUMAN | 111319 | 100% | 2  | 2  | 4  | 0.03% | 5.31%  |
| FTC133-p16 | (Q9Y4L1) 150 kDa oxygen-regulated protein precursor (Orp150) (Hypoxia up-regulated 1)                                  | OXR_P_HUMAN | 111319 | 100% | 9  | 13 | 41 | 0.35% | 17.40% |
| FTC133-p16 | (Q9Y4L1) 150 kDa oxygen-regulated protein precursor (Orp150) (Hypoxia up-regulated 1)                                  | OXR_P_HUMAN | 111319 | 100% | 3  | 5  | 32 | 0.28% | 7.41%  |
| FTC133-p16 | (Q9Y4L1) 150 kDa oxygen-regulated protein precursor (Orp150) (Hypoxia up-regulated 1)                                  | OXR_P_HUMAN | 111319 | 100% | 4  | 7  | 15 | 0.13% | 8.81%  |
| FTC133-p16 | (Q9Y4L1) 150 kDa oxygen-regulated protein precursor (Orp150) (Hypoxia up-regulated 1)                                  | OXR_P_HUMAN | 111319 | 100% | 2  | 3  | 19 | 0.17% | 4.50%  |
| FTC133-p16 | (Q9Y4L1) 150 kDa oxygen-regulated protein precursor (Orp150) (Hypoxia up-regulated 1)                                  | OXR_P_HUMAN | 111319 | 100% | 20 | 22 | 42 | 0.39% | 30.60% |
| FTC133-p16 | (Q9Y4L1) 150 kDa oxygen-regulated protein precursor (Orp150) (Hypoxia up-regulated 1)                                  | OXR_P_HUMAN | 111319 | 100% | 16 | 20 | 33 | 0.37% | 26.00% |

## Protein Identified Sequence Coverage in FTC-133

|            |                                                                                                                                                                                                                                                    |             |        |      |    |    |    |       |        |
|------------|----------------------------------------------------------------------------------------------------------------------------------------------------------------------------------------------------------------------------------------------------|-------------|--------|------|----|----|----|-------|--------|
| FTC133-p16 | (Q9Y4L1) 150 kDa oxygen-regulated protein precursor (Orp150) (Hypoxia up-regulated 1)                                                                                                                                                              | OXRP_HUMAN  | 111319 | 100% | 13 | 17 | 28 | 0.33% | 24.50% |
| FTC133-p16 | (Q9Y4L1) 150 kDa oxygen-regulated protein precursor (Orp150) (Hypoxia up-regulated 1)                                                                                                                                                              | OXRP_HUMAN  | 111319 | 100% | 8  | 9  | 17 | 0.20% | 13.70% |
| FTC133-p16 | (Q9Y4L1) 150 kDa oxygen-regulated protein precursor (Orp150) (Hypoxia up-regulated 1)                                                                                                                                                              | OXRP_HUMAN  | 111319 | 100% | 7  | 7  | 13 | 0.19% | 15.10% |
| FTC133-p16 | (Q9Y4L1) 150 kDa oxygen-regulated protein precursor (Orp150) (Hypoxia up-regulated 1)                                                                                                                                                              | OXRP_HUMAN  | 111319 | 100% | 16 | 21 | 35 | 0.32% | 26.40% |
| FTC133-p16 | (Q9Y625) Glypican-6 precursor                                                                                                                                                                                                                      | GPC6_HUMAN  | 62718  | 100% | 3  | 3  | 5  | 0.04% | 10.30% |
| FTC133-p16 | (Q9Y625) Glypican-6 precursor                                                                                                                                                                                                                      | GPC6_HUMAN  | 62718  | 100% | 4  | 7  | 23 | 0.20% | 15.50% |
| FTC133-p16 | (Q9Y625) Glypican-6 precursor                                                                                                                                                                                                                      | GPC6_HUMAN  | 62718  | 100% | 2  | 2  | 4  | 0.03% | 9.37%  |
| FTC133-p16 | (Q9Y625) Glypican-6 precursor                                                                                                                                                                                                                      | GPC6_HUMAN  | 62718  | 100% | 5  | 6  | 13 | 0.12% | 18.20% |
| FTC133-p16 | (Q9Y625) Glypican-6 precursor                                                                                                                                                                                                                      | GPC6_HUMAN  | 62718  | 100% | 4  | 5  | 6  | 0.07% | 14.60% |
| FTC133-p16 | (Q9Y625) Glypican-6 precursor                                                                                                                                                                                                                      | GPC6_HUMAN  | 62718  | 100% | 5  | 6  | 10 | 0.12% | 18.60% |
| FTC133-p16 | (Q9Y625) Glypican-6 precursor                                                                                                                                                                                                                      | GPC6_HUMAN  | 62718  | 100% | 3  | 4  | 9  | 0.11% | 9.55%  |
| FTC133-p16 | (Q9Y625) Glypican-6 precursor                                                                                                                                                                                                                      | GPC6_HUMAN  | 62718  | 100% | 4  | 4  | 6  | 0.09% | 15.50% |
| FTC133-p16 | (Q9Y625) Glypican-6 precursor                                                                                                                                                                                                                      | GPC6_HUMAN  | 62718  | 100% | 6  | 7  | 9  | 0.08% | 20.20% |
| FTC133-p16 | (Q9Y696) Chloride intracellular channel protein 4 (Intracellular chloride ion channel protein p64H1)                                                                                                                                               | CLIC4_HUMAN | 28624  | 100% | 2  | 2  | 2  | 0.02% | 16.70% |
| FTC133-p17 | (O00115) Deoxyribonuclease-2-alpha precursor (EC 3.1.22.1) (Deoxyribonuclease II alpha) (DNase II alpha) (Acid DNase) (Lysosomal DNase II) (R31240_2)                                                                                              | DNS2A_HUMAN | 39563  | 100% | 2  | 2  | 4  | 0.04% | 7.22%  |
| FTC133-p17 | (O00299) Chloride intracellular channel protein 1 (Nuclear chloride ion channel 27) (NCC27) (Chloride channel ABP) (Regulatory nuclear chloride ion channel protein) (hRNCC)                                                                       | CLIC1_HUMAN | 26774  | 100% | 3  | 3  | 5  | 0.05% | 16.20% |
| FTC133-p17 | (O00299) Chloride intracellular channel protein 1 (Nuclear chloride ion channel 27) (NCC27) (Chloride channel ABP) (Regulatory nuclear chloride ion channel protein) (hRNCC)                                                                       | CLIC1_HUMAN | 26774  | 100% | 2  | 2  | 3  | 0.03% | 12.50% |
| FTC133-p17 | (O00299) Chloride intracellular channel protein 1 (Nuclear chloride ion channel 27) (NCC27) (Chloride channel ABP) (Regulatory nuclear chloride ion channel protein) (hRNCC)                                                                       | CLIC1_HUMAN | 26774  | 100% | 3  | 3  | 4  | 0.04% | 16.20% |
| FTC133-p17 | (O00299) Chloride intracellular channel protein 1 (Nuclear chloride ion channel 27) (NCC27) (Chloride channel ABP) (Regulatory nuclear chloride ion channel protein) (hRNCC)                                                                       | CLIC1_HUMAN | 26774  | 100% | 2  | 2  | 2  | 0.02% | 20.40% |
| FTC133-p17 | (O00410) Importin beta-3 (Karyopherin beta-3) (Ran-binding protein 5) (RanBP5)                                                                                                                                                                     | IMB3_HUMAN  | 123483 | 100% | 2  | 3  | 3  | 0.03% | 3.47%  |
| FTC133-p17 | (O00754) Lysosomal alpha-mannosidase precursor (EC 3.2.1.24) (Mannosidase, alpha B) (Lysosomal acid alpha-mannosidase) (Laman) (Mannosidase alpha class 2B member 1) [Contains: Lysosomal alpha-mannosidase A peptide; Lysosomal alpha-mannosidase | MA2B1_HUMAN | 113656 | 100% | 2  | 2  | 2  | 0.02% | 4.65%  |
| FTC133-p17 | (O00754) Lysosomal alpha-mannosidase precursor (EC 3.2.1.24) (Mannosidase, alpha B) (Lysosomal acid alpha-mannosidase) (Laman) (Mannosidase alpha class 2B member 1) [Contains: Lysosomal alpha-mannosidase A peptide; Lysosomal alpha-mannosidase | MA2B1_HUMAN | 113656 | 100% | 2  | 2  | 2  | 0.02% | 4.26%  |

## Protein Identified Sequence Coverage in FTC-133

|            |                                                                                                                                                                                                              |             |       |      |    |    |    |       |        |
|------------|--------------------------------------------------------------------------------------------------------------------------------------------------------------------------------------------------------------|-------------|-------|------|----|----|----|-------|--------|
| FTC133-p17 | (O14773) Tripeptidyl-peptidase 1 precursor (EC 3.4.14.9) (Tripeptidyl-peptidase I) (TPP-I) (Tripeptidyl aminopeptidase) (Lysosomal pepstatin insensitive protease) (LPIC) (Growth-inhibiting gene 1 protein) | TPP1_HUMAN  | 61230 | 100% | 4  | 4  | 6  | 0.06% | 11.40% |
| FTC133-p17 | (O14773) Tripeptidyl-peptidase 1 precursor (EC 3.4.14.9) (Tripeptidyl-peptidase I) (TPP-I) (Tripeptidyl aminopeptidase) (Lysosomal pepstatin insensitive protease) (LPIC) (Growth-inhibiting gene 1 protein) | TPP1_HUMAN  | 61230 | 100% | 3  | 4  | 4  | 0.04% | 8.17%  |
| FTC133-p17 | (O14773) Tripeptidyl-peptidase 1 precursor (EC 3.4.14.9) (Tripeptidyl-peptidase I) (TPP-I) (Tripeptidyl aminopeptidase) (Lysosomal pepstatin insensitive protease) (LPIC) (Growth-inhibiting gene 1 protein) | TPP1_HUMAN  | 61230 | 100% | 2  | 3  | 4  | 0.05% | 5.68%  |
| FTC133-p17 | (O14773) Tripeptidyl-peptidase 1 precursor (EC 3.4.14.9) (Tripeptidyl-peptidase I) (TPP-I) (Tripeptidyl aminopeptidase) (Lysosomal pepstatin insensitive protease) (LPIC) (Growth-inhibiting gene 1 protein) | TPP1_HUMAN  | 61230 | 100% | 2  | 2  | 3  | 0.03% | 9.95%  |
| FTC133-p17 | (O43399) Tumor protein D54 (hD54) (Tumor protein D52-like 2)                                                                                                                                                 | TPD54_HUMAN | 22220 | 100% | 3  | 3  | 5  | 0.05% | 19.40% |
| FTC133-p17 | (O43399) Tumor protein D54 (hD54) (Tumor protein D52-like 2)                                                                                                                                                 | TPD54_HUMAN | 22220 | 100% | 8  | 10 | 17 | 0.16% | 45.60% |
| FTC133-p17 | (O43399) Tumor protein D54 (hD54) (Tumor protein D52-like 2)                                                                                                                                                 | TPD54_HUMAN | 22220 | 100% | 7  | 8  | 10 | 0.09% | 37.90% |
| FTC133-p17 | (O43399) Tumor protein D54 (hD54) (Tumor protein D52-like 2)                                                                                                                                                 | TPD54_HUMAN | 22220 | 100% | 4  | 4  | 6  | 0.07% | 24.30% |
| FTC133-p17 | (O43399) Tumor protein D54 (hD54) (Tumor protein D52-like 2)                                                                                                                                                 | TPD54_HUMAN | 22220 | 100% | 7  | 8  | 10 | 0.09% | 41.70% |
| FTC133-p17 | (O43399) Tumor protein D54 (hD54) (Tumor protein D52-like 2)                                                                                                                                                 | TPD54_HUMAN | 22220 | 100% | 2  | 2  | 3  | 0.03% | 21.80% |
| FTC133-p17 | (O43399) Tumor protein D54 (hD54) (Tumor protein D52-like 2)                                                                                                                                                 | TPD54_HUMAN | 22220 | 100% | 2  | 3  | 4  | 0.03% | 14.60% |
| FTC133-p17 | (O43399) Tumor protein D54 (hD54) (Tumor protein D52-like 2)                                                                                                                                                 | TPD54_HUMAN | 22220 | 99%  | 2  | 2  | 3  | 0.03% | 14.60% |
| FTC133-p17 | (O43852) Calumenin precursor (Crococalbin) (IEF SSP 9302)                                                                                                                                                    | CALU_HUMAN  | 37090 | 100% | 5  | 5  | 6  | 0.06% | 24.80% |
| FTC133-p17 | (O43852) Calumenin precursor (Crococalbin) (IEF SSP 9302)                                                                                                                                                    | CALU_HUMAN  | 37090 | 100% | 11 | 13 | 21 | 0.20% | 48.60% |
| FTC133-p17 | (O43852) Calumenin precursor (Crococalbin) (IEF SSP 9302)                                                                                                                                                    | CALU_HUMAN  | 37090 | 100% | 12 | 13 | 23 | 0.21% | 57.80% |
| FTC133-p17 | (O43852) Calumenin precursor (Crococalbin) (IEF SSP 9302)                                                                                                                                                    | CALU_HUMAN  | 37090 | 100% | 8  | 8  | 13 | 0.16% | 41.30% |
| FTC133-p17 | (O43852) Calumenin precursor (Crococalbin) (IEF SSP 9302)                                                                                                                                                    | CALU_HUMAN  | 37090 | 100% | 2  | 2  | 3  | 0.05% | 14.60% |
| FTC133-p17 | (O43852) Calumenin precursor (Crococalbin) (IEF SSP 9302)                                                                                                                                                    | CALU_HUMAN  | 37090 | 100% | 10 | 11 | 20 | 0.19% | 44.80% |
| FTC133-p17 | (O43852) Calumenin precursor (Crococalbin) (IEF SSP 9302)                                                                                                                                                    | CALU_HUMAN  | 37090 | 100% | 2  | 2  | 3  | 0.03% | 12.70% |
| FTC133-p17 | (O43852) Calumenin precursor (Crococalbin) (IEF SSP 9302)                                                                                                                                                    | CALU_HUMAN  | 37090 | 100% | 2  | 2  | 2  | 0.02% | 7.62%  |
| FTC133-p17 | (O43852) Calumenin precursor (Crococalbin) (IEF SSP 9302)                                                                                                                                                    | CALU_HUMAN  | 37090 | 100% | 3  | 3  | 12 | 0.10% | 21.90% |

## Protein Identified Sequence Coverage in FTC-133

|            |                                                                                                                                                                                                                                                   |             |        |      |   |   |    |       |        |
|------------|---------------------------------------------------------------------------------------------------------------------------------------------------------------------------------------------------------------------------------------------------|-------------|--------|------|---|---|----|-------|--------|
| FTC133-p17 | (O60664) Mannose-6-phosphate receptor-binding protein 1 (Cargo selection protein TIP47) (47 kDa mannose 6-phosphate receptor-binding protein) (47 kDa MPR-binding protein) (Placental protein 17) (PP17)                                          | M6PBP_HUMAN | 47028  | 100% | 6 | 6 | 10 | 0.09% | 24.00% |
| FTC133-p17 | (O60664) Mannose-6-phosphate receptor-binding protein 1 (Cargo selection protein TIP47) (47 kDa mannose 6-phosphate receptor-binding protein) (47 kDa MPR-binding protein) (Placental protein 17) (PP17)                                          | M6PBP_HUMAN | 47028  | 100% | 4 | 4 | 6  | 0.06% | 14.30% |
| FTC133-p17 | (O60664) Mannose-6-phosphate receptor-binding protein 1 (Cargo selection protein TIP47) (47 kDa mannose 6-phosphate receptor-binding protein) (47 kDa MPR-binding protein) (Placental protein 17) (PP17)                                          | M6PBP_HUMAN | 47028  | 100% | 3 | 3 | 4  | 0.05% | 11.10% |
| FTC133-p17 | (O60664) Mannose-6-phosphate receptor-binding protein 1 (Cargo selection protein TIP47) (47 kDa mannose 6-phosphate receptor-binding protein) (47 kDa MPR-binding protein) (Placental protein 17) (PP17)                                          | M6PBP_HUMAN | 47028  | 100% | 5 | 5 | 7  | 0.07% | 20.50% |
| FTC133-p17 | (O60664) Mannose-6-phosphate receptor-binding protein 1 (Cargo selection protein TIP47) (47 kDa mannose 6-phosphate receptor-binding protein) (47 kDa MPR-binding protein) (Placental protein 17) (PP17)                                          | M6PBP_HUMAN | 47028  | 100% | 2 | 2 | 3  | 0.03% | 10.40% |
| FTC133-p17 | (O94759) Transient receptor potential cation channel subfamily M member 2 (EC 3.6.1.13) (Long transient receptor potential channel 2) (LTrpC2) (LTrpC-2) (Transient receptor potential channel 7) (TrpC7) (Estrogen-responsive element-associated | TRPM2_HUMAN | 171212 | 99%  | 2 | 2 | 2  | 0.02% | 1.53%  |
| FTC133-p17 | (O95232) Cisplatin resistance-associated overexpressed protein (cAMP regulatory element associated protein 1) (CRE-associated protein 1) (CREAP-1) (Luc7A) (Okadaic acid-inducible phosphoprotein OA48-18)                                        | CROP_HUMAN  | 51449  | 100% | 2 | 2 | 2  | 0.02% | 6.71%  |
| FTC133-p17 | (P00338) L-lactate dehydrogenase A chain (EC 1.1.1.27) (LDH-A) (LDH muscle subunit) (LDH-M) (Proliferation-inducing gene 19 protein) (NY-REN-59 antigen)                                                                                          | LDHA_HUMAN  | 36540  | 100% | 3 | 3 | 4  | 0.04% | 10.60% |
| FTC133-p17 | (P00338) L-lactate dehydrogenase A chain (EC 1.1.1.27) (LDH-A) (LDH muscle subunit) (LDH-M) (Proliferation-inducing gene 19 protein) (NY-REN-59 antigen)                                                                                          | LDHA_HUMAN  | 36540  | 100% | 5 | 5 | 6  | 0.06% | 17.80% |
| FTC133-p17 | (P00338) L-lactate dehydrogenase A chain (EC 1.1.1.27) (LDH-A) (LDH muscle subunit) (LDH-M) (Proliferation-inducing gene 19 protein) (NY-REN-59 antigen)                                                                                          | LDHA_HUMAN  | 36540  | 100% | 3 | 3 | 3  | 0.04% | 10.60% |
| FTC133-p17 | (P00338) L-lactate dehydrogenase A chain (EC 1.1.1.27) (LDH-A) (LDH muscle subunit) (LDH-M) (Proliferation-inducing gene 19 protein) (NY-REN-59 antigen)                                                                                          | LDHA_HUMAN  | 36540  | 100% | 4 | 4 | 5  | 0.05% | 13.00% |
| FTC133-p17 | (P00558) Phosphoglycerate kinase 1 (EC 2.7.2.3) (Primer recognition protein 2) (PRP 2)                                                                                                                                                            | PGK1_HUMAN  | 44466  | 100% | 3 | 4 | 4  | 0.04% | 12.50% |
| FTC133-p17 | (P00558) Phosphoglycerate kinase 1 (EC 2.7.2.3) (Primer recognition protein 2) (PRP 2)                                                                                                                                                            | PGK1_HUMAN  | 44466  | 100% | 8 | 9 | 14 | 0.13% | 26.70% |

## Protein Identified Sequence Coverage in FTC-133

|            |                                                                                                                                                                                     |            |       |      |    |    |    |       |        |
|------------|-------------------------------------------------------------------------------------------------------------------------------------------------------------------------------------|------------|-------|------|----|----|----|-------|--------|
| FTC133-p17 | (P00558) Phosphoglycerate kinase 1 (EC 2.7.2.3) (Primer recognition protein 2) (PRP 2)                                                                                              | PGK1_HUMAN | 44466 | 100% | 11 | 11 | 16 | 0.15% | 38.00% |
| FTC133-p17 | (P00558) Phosphoglycerate kinase 1 (EC 2.7.2.3) (Primer recognition protein 2) (PRP 2)                                                                                              | PGK1_HUMAN | 44466 | 100% | 12 | 14 | 19 | 0.23% | 40.90% |
| FTC133-p17 | (P00558) Phosphoglycerate kinase 1 (EC 2.7.2.3) (Primer recognition protein 2) (PRP 2)                                                                                              | PGK1_HUMAN | 44466 | 100% | 11 | 13 | 21 | 0.20% | 37.00% |
| FTC133-p17 | (P00558) Phosphoglycerate kinase 1 (EC 2.7.2.3) (Primer recognition protein 2) (PRP 2)                                                                                              | PGK1_HUMAN | 44466 | 100% | 2  | 2  | 4  | 0.03% | 7.93%  |
| FTC133-p17 | (P00558) Phosphoglycerate kinase 1 (EC 2.7.2.3) (Primer recognition protein 2) (PRP 2)                                                                                              | PGK1_HUMAN | 44466 | 99%  | 2  | 3  | 3  | 0.03% | 8.65%  |
| FTC133-p17 | (P01011) Alpha-1-antichymotrypsin precursor (ACT) [Contains: Alpha-1-antichymotrypsin His-Pro-less]                                                                                 | AACT_HUMAN | 47635 | 100% | 3  | 4  | 13 | 0.11% | 13.20% |
| FTC133-p17 | (P01011) Alpha-1-antichymotrypsin precursor (ACT) [Contains: Alpha-1-antichymotrypsin His-Pro-less]                                                                                 | AACT_HUMAN | 47635 | 100% | 3  | 4  | 21 | 0.18% | 13.70% |
| FTC133-p17 | (P01011) Alpha-1-antichymotrypsin precursor (ACT) [Contains: Alpha-1-antichymotrypsin His-Pro-less]                                                                                 | AACT_HUMAN | 47635 | 100% | 3  | 4  | 30 | 0.25% | 13.00% |
| FTC133-p17 | (P01011) Alpha-1-antichymotrypsin precursor (ACT) [Contains: Alpha-1-antichymotrypsin His-Pro-less]                                                                                 | AACT_HUMAN | 47635 | 100% | 2  | 3  | 8  | 0.07% | 9.22%  |
| FTC133-p17 | (P01011) Alpha-1-antichymotrypsin precursor (ACT) [Contains: Alpha-1-antichymotrypsin His-Pro-less]                                                                                 | AACT_HUMAN | 47635 | 100% | 3  | 4  | 32 | 0.28% | 13.20% |
| FTC133-p17 | (P01011) Alpha-1-antichymotrypsin precursor (ACT) [Contains: Alpha-1-antichymotrypsin His-Pro-less]                                                                                 | AACT_HUMAN | 47635 | 99%  | 2  | 3  | 28 | 0.24% | 8.75%  |
| FTC133-p17 | (P01011) Alpha-1-antichymotrypsin precursor (ACT) [Contains: Alpha-1-antichymotrypsin His-Pro-less]                                                                                 | AACT_HUMAN | 47635 | 100% | 4  | 5  | 26 | 0.23% | 18.20% |
| FTC133-p17 | (P02545) Lamin-A/C (70 kDa lamin) (NY-REN-32 antigen)                                                                                                                               | LMNA_HUMAN | 74123 | 100% | 9  | 10 | 14 | 0.13% | 16.90% |
| FTC133-p17 | (P02545) Lamin-A/C (70 kDa lamin) (NY-REN-32 antigen)                                                                                                                               | LMNA_HUMAN | 74123 | 100% | 20 | 22 | 39 | 0.37% | 39.90% |
| FTC133-p17 | (P02545) Lamin-A/C (70 kDa lamin) (NY-REN-32 antigen)                                                                                                                               | LMNA_HUMAN | 74123 | 100% | 18 | 19 | 32 | 0.30% | 31.80% |
| FTC133-p17 | (P02545) Lamin-A/C (70 kDa lamin) (NY-REN-32 antigen)                                                                                                                               | LMNA_HUMAN | 74123 | 100% | 5  | 5  | 6  | 0.07% | 8.89%  |
| FTC133-p17 | (P02545) Lamin-A/C (70 kDa lamin) (NY-REN-32 antigen)                                                                                                                               | LMNA_HUMAN | 74123 | 100% | 5  | 5  | 5  | 0.08% | 8.13%  |
| FTC133-p17 | (P02545) Lamin-A/C (70 kDa lamin) (NY-REN-32 antigen)                                                                                                                               | LMNA_HUMAN | 74123 | 100% | 17 | 19 | 39 | 0.37% | 30.40% |
| FTC133-p17 | (P02545) Lamin-A/C (70 kDa lamin) (NY-REN-32 antigen)                                                                                                                               | LMNA_HUMAN | 74123 | 100% | 2  | 2  | 2  | 0.02% | 7.83%  |
| FTC133-p17 | (P02545) Lamin-A/C (70 kDa lamin) (NY-REN-32 antigen)                                                                                                                               | LMNA_HUMAN | 74123 | 100% | 2  | 2  | 2  | 0.02% | 5.57%  |
| FTC133-p17 | (P02545) Lamin-A/C (70 kDa lamin) (NY-REN-32 antigen)                                                                                                                               | LMNA_HUMAN | 74123 | 100% | 2  | 2  | 2  | 0.02% | 3.61%  |
| FTC133-p17 | (P04062) Glucosylceramidase precursor (EC 3.2.1.45) (Beta-glucocerebrosidase) (Acid beta-glucosidase) (D-glucosyl-N-acylsphingosine glucosylhydrolase) (Alglucerase) (Imiglucerase) | GLCM_HUMAN | 59700 | 100% | 2  | 2  | 3  | 0.03% | 9.33%  |
| FTC133-p17 | (P04062) Glucosylceramidase precursor (EC 3.2.1.45) (Beta-glucocerebrosidase) (Acid beta-glucosidase) (D-glucosyl-N-acylsphingosine glucosylhydrolase) (Alglucerase) (Imiglucerase) | GLCM_HUMAN | 59700 | 100% | 2  | 2  | 2  | 0.02% | 8.77%  |



Protein Identified Sequence Coverage in FTC-133

|            |                                                                                                                                                                                  |             |       |      |   |   |    |       |        |
|------------|----------------------------------------------------------------------------------------------------------------------------------------------------------------------------------|-------------|-------|------|---|---|----|-------|--------|
| FTC133-p17 | (P04062) Glucosylceramidase precursor (EC 3.2.1.45) (Beta-glucocerebrosidase) (Acid beta-glucosidase) (D-glucosyl-N-acylsphingosine glucohydrolase) (Alglucerase) (Imiglucerase) | GLCM_HUMAN  | 59700 | 100% | 2 | 2 | 2  | 0.02% | 7.65%  |
| FTC133-p17 | (P04062) Glucosylceramidase precursor (EC 3.2.1.45) (Beta-glucocerebrosidase) (Acid beta-glucosidase) (D-glucosyl-N-acylsphingosine glucohydrolase) (Alglucerase) (Imiglucerase) | GLCM_HUMAN  | 59700 | 100% | 3 | 3 | 6  | 0.06% | 12.10% |
| FTC133-p17 | (P04062) Glucosylceramidase precursor (EC 3.2.1.45) (Beta-glucocerebrosidase) (Acid beta-glucosidase) (D-glucosyl-N-acylsphingosine glucohydrolase) (Alglucerase) (Imiglucerase) | GLCM_HUMAN  | 59700 | 100% | 2 | 2 | 2  | 0.02% | 6.72%  |
| FTC133-p17 | (P04062) Glucosylceramidase precursor (EC 3.2.1.45) (Beta-glucocerebrosidase) (Acid beta-glucosidase) (D-glucosyl-N-acylsphingosine glucohydrolase) (Alglucerase) (Imiglucerase) | GLCM_HUMAN  | 59700 | 100% | 2 | 2 | 2  | 0.02% | 6.53%  |
| FTC133-p17 | (P04062) Glucosylceramidase precursor (EC 3.2.1.45) (Beta-glucocerebrosidase) (Acid beta-glucosidase) (D-glucosyl-N-acylsphingosine glucohydrolase) (Alglucerase) (Imiglucerase) | GLCM_HUMAN  | 59700 | 100% | 2 | 2 | 2  | 0.02% | 5.04%  |
| FTC133-p17 | (P04075) Fructose-bisphosphate aldolase A (EC 4.1.2.13) (Muscle-type aldolase) (Lung cancer antigen NY-LU-1)                                                                     | ALDOA_HUMAN | 39271 | 100% | 6 | 8 | 12 | 0.11% | 26.20% |
| FTC133-p17 | (P04075) Fructose-bisphosphate aldolase A (EC 4.1.2.13) (Muscle-type aldolase) (Lung cancer antigen NY-LU-1)                                                                     | ALDOA_HUMAN | 39271 | 100% | 5 | 5 | 7  | 0.06% | 20.70% |
| FTC133-p17 | (P04075) Fructose-bisphosphate aldolase A (EC 4.1.2.13) (Muscle-type aldolase) (Lung cancer antigen NY-LU-1)                                                                     | ALDOA_HUMAN | 39271 | 100% | 2 | 2 | 2  | 0.02% | 9.64%  |
| FTC133-p17 | (P04075) Fructose-bisphosphate aldolase A (EC 4.1.2.13) (Muscle-type aldolase) (Lung cancer antigen NY-LU-1)                                                                     | ALDOA_HUMAN | 39271 | 100% | 2 | 2 | 2  | 0.03% | 11.60% |
| FTC133-p17 | (P04075) Fructose-bisphosphate aldolase A (EC 4.1.2.13) (Muscle-type aldolase) (Lung cancer antigen NY-LU-1)                                                                     | ALDOA_HUMAN | 39271 | 100% | 6 | 8 | 11 | 0.10% | 22.60% |
| FTC133-p17 | (P04075) Fructose-bisphosphate aldolase A (EC 4.1.2.13) (Muscle-type aldolase) (Lung cancer antigen NY-LU-1)                                                                     | ALDOA_HUMAN | 39271 | 100% | 2 | 2 | 2  | 0.02% | 11.60% |
| FTC133-p17 | (P04083) Annexin A1 (Annexin I) (Lipocortin I) (Calpactin II) (Chromobindin-9) (p35) (Phospholipase A2 inhibitory protein)                                                       | ANXA1_HUMAN | 38567 | 100% | 3 | 3 | 3  | 0.03% | 13.60% |
| FTC133-p17 | (P04083) Annexin A1 (Annexin I) (Lipocortin I) (Calpactin II) (Chromobindin-9) (p35) (Phospholipase A2 inhibitory protein)                                                       | ANXA1_HUMAN | 38567 | 100% | 4 | 5 | 7  | 0.07% | 18.00% |
| FTC133-p17 | (P04083) Annexin A1 (Annexin I) (Lipocortin I) (Calpactin II) (Chromobindin-9) (p35) (Phospholipase A2 inhibitory protein)                                                       | ANXA1_HUMAN | 38567 | 100% | 7 | 8 | 13 | 0.12% | 31.90% |
| FTC133-p17 | (P04083) Annexin A1 (Annexin I) (Lipocortin I) (Calpactin II) (Chromobindin-9) (p35) (Phospholipase A2 inhibitory protein)                                                       | ANXA1_HUMAN | 38567 | 100% | 6 | 7 | 10 | 0.12% | 24.30% |
| FTC133-p17 | (P04083) Annexin A1 (Annexin I) (Lipocortin I) (Calpactin II) (Chromobindin-9) (p35) (Phospholipase A2 inhibitory protein)                                                       | ANXA1_HUMAN | 38567 | 100% | 6 | 6 | 8  | 0.08% | 22.90% |
| FTC133-p17 | (P04083) Annexin A1 (Annexin I) (Lipocortin I) (Calpactin II) (Chromobindin-9) (p35) (Phospholipase A2 inhibitory protein)                                                       | ANXA1_HUMAN | 38567 | 100% | 3 | 3 | 7  | 0.06% | 12.50% |

## Protein Identified Sequence Coverage in FTC-133

|            |                                                                                                                            |             |       |      |    |    |    |       |        |
|------------|----------------------------------------------------------------------------------------------------------------------------|-------------|-------|------|----|----|----|-------|--------|
| FTC133-p17 | (P04083) Annexin A1 (Annexin I) (Lipocortin I) (Calpactin II) (Chromobindin-9) (p35) (Phospholipase A2 inhibitory protein) | ANXA1_HUMAN | 38567 | 99%  | 2  | 3  | 4  | 0.03% | 11.30% |
| FTC133-p17 | (P04216) Thy-1 membrane glycoprotein precursor (Thy-1 antigen) (CD90 antigen) (CDw90 antigen)                              | THY1_HUMAN  | 17917 | 100% | 4  | 5  | 9  | 0.09% | 42.90% |
| FTC133-p17 | (P04216) Thy-1 membrane glycoprotein precursor (Thy-1 antigen) (CD90 antigen) (CDw90 antigen)                              | THY1_HUMAN  | 17917 | 100% | 4  | 4  | 4  | 0.04% | 42.90% |
| FTC133-p17 | (P04216) Thy-1 membrane glycoprotein precursor (Thy-1 antigen) (CD90 antigen) (CDw90 antigen)                              | THY1_HUMAN  | 17917 | 100% | 3  | 4  | 6  | 0.06% | 36.60% |
| FTC133-p17 | (P04216) Thy-1 membrane glycoprotein precursor (Thy-1 antigen) (CD90 antigen) (CDw90 antigen)                              | THY1_HUMAN  | 17917 | 100% | 4  | 5  | 9  | 0.08% | 42.90% |
| FTC133-p17 | (P04216) Thy-1 membrane glycoprotein precursor (Thy-1 antigen) (CD90 antigen) (CDw90 antigen)                              | THY1_HUMAN  | 17917 | 100% | 3  | 4  | 7  | 0.07% | 24.20% |
| FTC133-p17 | (P04216) Thy-1 membrane glycoprotein precursor (Thy-1 antigen) (CD90 antigen) (CDw90 antigen)                              | THY1_HUMAN  | 17917 | 100% | 3  | 5  | 8  | 0.08% | 24.20% |
| FTC133-p17 | (P04216) Thy-1 membrane glycoprotein precursor (Thy-1 antigen) (CD90 antigen) (CDw90 antigen)                              | THY1_HUMAN  | 17917 | 100% | 3  | 5  | 15 | 0.14% | 24.20% |
| FTC133-p17 | (P04216) Thy-1 membrane glycoprotein precursor (Thy-1 antigen) (CD90 antigen) (CDw90 antigen)                              | THY1_HUMAN  | 17917 | 100% | 3  | 5  | 16 | 0.19% | 24.20% |
| FTC133-p17 | (P04216) Thy-1 membrane glycoprotein precursor (Thy-1 antigen) (CD90 antigen) (CDw90 antigen)                              | THY1_HUMAN  | 17917 | 100% | 3  | 5  | 15 | 0.14% | 24.20% |
| FTC133-p17 | (P04406) Glycerinaldehyde-3-phosphate dehydrogenase (EC 1.2.1.12) (GAPDH)                                                  | G3P_HUMAN   | 35904 | 100% | 3  | 3  | 3  | 0.03% | 14.10% |
| FTC133-p17 | (P04406) Glycerinaldehyde-3-phosphate dehydrogenase (EC 1.2.1.12) (GAPDH)                                                  | G3P_HUMAN   | 35904 | 100% | 4  | 5  | 5  | 0.05% | 19.20% |
| FTC133-p17 | (P04406) Glycerinaldehyde-3-phosphate dehydrogenase (EC 1.2.1.12) (GAPDH)                                                  | G3P_HUMAN   | 35904 | 100% | 4  | 4  | 4  | 0.04% | 12.60% |
| FTC133-p17 | (P04406) Glycerinaldehyde-3-phosphate dehydrogenase (EC 1.2.1.12) (GAPDH)                                                  | G3P_HUMAN   | 35904 | 100% | 3  | 3  | 6  | 0.06% | 12.90% |
| FTC133-p17 | (P04406) Glycerinaldehyde-3-phosphate dehydrogenase (EC 1.2.1.12) (GAPDH)                                                  | G3P_HUMAN   | 35904 | 100% | 5  | 6  | 8  | 0.08% | 23.40% |
| FTC133-p17 | (P04406) Glycerinaldehyde-3-phosphate dehydrogenase (EC 1.2.1.12) (GAPDH)                                                  | G3P_HUMAN   | 35904 | 100% | 9  | 10 | 18 | 0.17% | 38.30% |
| FTC133-p17 | (P04406) Glycerinaldehyde-3-phosphate dehydrogenase (EC 1.2.1.12) (GAPDH)                                                  | G3P_HUMAN   | 35904 | 100% | 10 | 12 | 25 | 0.23% | 51.80% |
| FTC133-p17 | (P04406) Glycerinaldehyde-3-phosphate dehydrogenase (EC 1.2.1.12) (GAPDH)                                                  | G3P_HUMAN   | 35904 | 100% | 8  | 10 | 26 | 0.31% | 45.20% |
| FTC133-p17 | (P04406) Glycerinaldehyde-3-phosphate dehydrogenase (EC 1.2.1.12) (GAPDH)                                                  | G3P_HUMAN   | 35904 | 100% | 2  | 2  | 3  | 0.05% | 12.60% |
| FTC133-p17 | (P04406) Glycerinaldehyde-3-phosphate dehydrogenase (EC 1.2.1.12) (GAPDH)                                                  | G3P_HUMAN   | 35904 | 100% | 8  | 11 | 24 | 0.23% | 40.10% |
| FTC133-p17 | (P04406) Glycerinaldehyde-3-phosphate dehydrogenase (EC 1.2.1.12) (GAPDH)                                                  | G3P_HUMAN   | 35904 | 100% | 2  | 2  | 3  | 0.03% | 12.60% |
| FTC133-p17 | (P04406) Glycerinaldehyde-3-phosphate dehydrogenase (EC 1.2.1.12) (GAPDH)                                                  | G3P_HUMAN   | 35904 | 100% | 2  | 3  | 9  | 0.08% | 15.60% |
| FTC133-p17 | (P04406) Glycerinaldehyde-3-phosphate dehydrogenase (EC 1.2.1.12) (GAPDH)                                                  | G3P_HUMAN   | 35904 | 100% | 2  | 3  | 27 | 0.23% | 11.40% |

Protein Identified Sequence Coverage in FTC-133

|            |                                                                                                                                                                                                                                               |             |       |      |   |   |    |       |        |
|------------|-----------------------------------------------------------------------------------------------------------------------------------------------------------------------------------------------------------------------------------------------|-------------|-------|------|---|---|----|-------|--------|
| FTC133-p17 | (P04406) Glyceraldehyde-3-phosphate dehydrogenase (EC 1.2.1.12) (GAPDH)                                                                                                                                                                       | G3P_HUMAN   | 35904 | 99%  | 2 | 2 | 2  | 0.02% | 10.50% |
| FTC133-p17 | (P04632) Calpain small subunit 1 (CSS1) (Calcium-dependent protease small subunit 1) (Calcium-dependent protease small subunit) (CDPS) (Calpain regulatory subunit) (Calcium-activated neutral proteinase small subunit) (CANP small subunit) | CPNS1_HUMAN | 28299 | 100% | 3 | 3 | 4  | 0.04% | 23.10% |
| FTC133-p17 | (P04632) Calpain small subunit 1 (CSS1) (Calcium-dependent protease small subunit 1) (Calcium-dependent protease small subunit) (CDPS) (Calpain regulatory subunit) (Calcium-activated neutral proteinase small subunit) (CANP small subunit) | CPNS1_HUMAN | 28299 | 100% | 2 | 3 | 3  | 0.04% | 17.50% |
| FTC133-p17 | (P04632) Calpain small subunit 1 (CSS1) (Calcium-dependent protease small subunit 1) (Calcium-dependent protease small subunit) (CDPS) (Calpain regulatory subunit) (Calcium-activated neutral proteinase small subunit) (CANP small subunit) | CPNS1_HUMAN | 28299 | 100% | 3 | 3 | 5  | 0.08% | 24.60% |
| FTC133-p17 | (P04632) Calpain small subunit 1 (CSS1) (Calcium-dependent protease small subunit 1) (Calcium-dependent protease small subunit) (CDPS) (Calpain regulatory subunit) (Calcium-activated neutral proteinase small subunit) (CANP small subunit) | CPNS1_HUMAN | 28299 | 100% | 2 | 2 | 4  | 0.04% | 15.70% |
| FTC133-p17 | (P04632) Calpain small subunit 1 (CSS1) (Calcium-dependent protease small subunit 1) (Calcium-dependent protease small subunit) (CDPS) (Calpain regulatory subunit) (Calcium-activated neutral proteinase small subunit) (CANP small subunit) | CPNS1_HUMAN | 28299 | 100% | 2 | 2 | 2  | 0.02% | 17.50% |
| FTC133-p17 | (P04792) Heat-shock protein beta-1 (HspB1) (Heat shock 27 kDa protein) (HSP 27) (Stress-responsive protein 27) (SRP27) (Estrogen-regulated 24 kDa protein) (28 kDa heat shock protein)                                                        | HSPB1_HUMAN | 22765 | 100% | 2 | 2 | 2  | 0.02% | 13.20% |
| FTC133-p17 | (P04792) Heat-shock protein beta-1 (HspB1) (Heat shock 27 kDa protein) (HSP 27) (Stress-responsive protein 27) (SRP27) (Estrogen-regulated 24 kDa protein) (28 kDa heat shock protein)                                                        | HSPB1_HUMAN | 22765 | 100% | 2 | 2 | 2  | 0.02% | 13.20% |
| FTC133-p17 | (P04792) Heat-shock protein beta-1 (HspB1) (Heat shock 27 kDa protein) (HSP 27) (Stress-responsive protein 27) (SRP27) (Estrogen-regulated 24 kDa protein) (28 kDa heat shock protein)                                                        | HSPB1_HUMAN | 22765 | 100% | 3 | 3 | 5  | 0.05% | 21.50% |
| FTC133-p17 | (P04792) Heat-shock protein beta-1 (HspB1) (Heat shock 27 kDa protein) (HSP 27) (Stress-responsive protein 27) (SRP27) (Estrogen-regulated 24 kDa protein) (28 kDa heat shock protein)                                                        | HSPB1_HUMAN | 22765 | 100% | 3 | 3 | 4  | 0.04% | 21.00% |
| FTC133-p17 | (P04792) Heat-shock protein beta-1 (HspB1) (Heat shock 27 kDa protein) (HSP 27) (Stress-responsive protein 27) (SRP27) (Estrogen-regulated 24 kDa protein) (28 kDa heat shock protein)                                                        | HSPB1_HUMAN | 22765 | 100% | 6 | 7 | 12 | 0.11% | 41.50% |

## Protein Identified Sequence Coverage in FTC-133

|            |                                                                                                                                                                                        |             |       |      |   |   |    |       |        |
|------------|----------------------------------------------------------------------------------------------------------------------------------------------------------------------------------------|-------------|-------|------|---|---|----|-------|--------|
| FTC133-p17 | (P04792) Heat-shock protein beta-1 (HspB1) (Heat shock 27 kDa protein) (HSP 27) (Stress-responsive protein 27) (SRP27) (Estrogen-regulated 24 kDa protein) (28 kDa heat shock protein) | HSPB1_HUMAN | 22765 | 100% | 5 | 6 | 14 | 0.13% | 41.50% |
| FTC133-p17 | (P04792) Heat-shock protein beta-1 (HspB1) (Heat shock 27 kDa protein) (HSP 27) (Stress-responsive protein 27) (SRP27) (Estrogen-regulated 24 kDa protein) (28 kDa heat shock protein) | HSPB1_HUMAN | 22765 | 100% | 5 | 6 | 13 | 0.16% | 36.10% |
| FTC133-p17 | (P04792) Heat-shock protein beta-1 (HspB1) (Heat shock 27 kDa protein) (HSP 27) (Stress-responsive protein 27) (SRP27) (Estrogen-regulated 24 kDa protein) (28 kDa heat shock protein) | HSPB1_HUMAN | 22765 | 100% | 4 | 4 | 13 | 0.12% | 41.00% |
| FTC133-p17 | (P04792) Heat-shock protein beta-1 (HspB1) (Heat shock 27 kDa protein) (HSP 27) (Stress-responsive protein 27) (SRP27) (Estrogen-regulated 24 kDa protein) (28 kDa heat shock protein) | HSPB1_HUMAN | 22765 | 99%  | 2 | 3 | 7  | 0.06% | 22.90% |
| FTC133-p17 | (P05387) 60S acidic ribosomal protein P2 (NY-REN-44 antigen)                                                                                                                           | RLA2_HUMAN  | 11647 | 100% | 2 | 2 | 4  | 0.04% | 39.10% |
| FTC133-p17 | (P05387) 60S acidic ribosomal protein P2 (NY-REN-44 antigen)                                                                                                                           | RLA2_HUMAN  | 11647 | 100% | 2 | 2 | 3  | 0.03% | 39.10% |
| FTC133-p17 | (P05387) 60S acidic ribosomal protein P2 (NY-REN-44 antigen)                                                                                                                           | RLA2_HUMAN  | 11647 | 100% | 2 | 2 | 2  | 0.02% | 39.10% |
| FTC133-p17 | (P05387) 60S acidic ribosomal protein P2 (NY-REN-44 antigen)                                                                                                                           | RLA2_HUMAN  | 11647 | 100% | 2 | 2 | 2  | 0.02% | 39.10% |
| FTC133-p17 | (P05388) 60S acidic ribosomal protein P0 (L10E)                                                                                                                                        | RLA0_HUMAN  | 34256 | 100% | 4 | 4 | 4  | 0.04% | 21.10% |
| FTC133-p17 | (P05388) 60S acidic ribosomal protein P0 (L10E)                                                                                                                                        | RLA0_HUMAN  | 34256 | 100% | 5 | 5 | 7  | 0.06% | 23.70% |
| FTC133-p17 | (P05388) 60S acidic ribosomal protein P0 (L10E)                                                                                                                                        | RLA0_HUMAN  | 34256 | 100% | 6 | 6 | 6  | 0.07% | 29.00% |
| FTC133-p17 | (P05388) 60S acidic ribosomal protein P0 (L10E)                                                                                                                                        | RLA0_HUMAN  | 34256 | 100% | 4 | 4 | 5  | 0.05% | 20.80% |
| FTC133-p17 | (P05388) 60S acidic ribosomal protein P0 (L10E)                                                                                                                                        | RLA0_HUMAN  | 34256 | 100% | 3 | 3 | 3  | 0.03% | 17.70% |
| FTC133-p17 | (P06576) ATP synthase beta chain, mitochondrial precursor (EC 3.6.3.14)                                                                                                                | ATPB_HUMAN  | 56543 | 100% | 3 | 3 | 3  | 0.03% | 7.56%  |
| FTC133-p17 | (P06576) ATP synthase beta chain, mitochondrial precursor (EC 3.6.3.14)                                                                                                                | ATPB_HUMAN  | 56543 | 100% | 7 | 7 | 8  | 0.08% | 20.00% |
| FTC133-p17 | (P06576) ATP synthase beta chain, mitochondrial precursor (EC 3.6.3.14)                                                                                                                | ATPB_HUMAN  | 56543 | 100% | 3 | 4 | 4  | 0.04% | 9.07%  |
| FTC133-p17 | (P06576) ATP synthase beta chain, mitochondrial precursor (EC 3.6.3.14)                                                                                                                | ATPB_HUMAN  | 56543 | 100% | 5 | 5 | 5  | 0.06% | 14.40% |
| FTC133-p17 | (P06576) ATP synthase beta chain, mitochondrial precursor (EC 3.6.3.14)                                                                                                                | ATPB_HUMAN  | 56543 | 100% | 5 | 5 | 5  | 0.05% | 15.30% |
| FTC133-p17 | (P06576) ATP synthase beta chain, mitochondrial precursor (EC 3.6.3.14)                                                                                                                | ATPB_HUMAN  | 56543 | 100% | 2 | 2 | 2  | 0.02% | 10.80% |
| FTC133-p17 | (P06576) ATP synthase beta chain, mitochondrial precursor (EC 3.6.3.14)                                                                                                                | ATPB_HUMAN  | 56543 | 100% | 3 | 3 | 5  | 0.04% | 8.51%  |
| FTC133-p17 | (P06576) ATP synthase beta chain, mitochondrial precursor (EC 3.6.3.14)                                                                                                                | ATPB_HUMAN  | 56543 | 100% | 3 | 3 | 4  | 0.03% | 13.00% |
| FTC133-p17 | (P06703) Protein S100-A6 (S100 calcium-binding protein A6) (Calcyclin) (Prolactin receptor-associated protein) (PRA) (Growth factor-inducible protein 2A9) (MLN 4)                     | S10A6_HUMAN | 10162 | 100% | 2 | 2 | 3  | 0.03% | 16.70% |

## Protein Identified Sequence Coverage in FTC-133

|            |                                                                                                                                                                                                                            |            |       |      |    |    |    |       |        |
|------------|----------------------------------------------------------------------------------------------------------------------------------------------------------------------------------------------------------------------------|------------|-------|------|----|----|----|-------|--------|
| FTC133-p17 | (P06733) Alpha-enolase (EC 4.2.1.11) (2-phospho-D-glycerate hydro-lyase) (Non-neural enolase) (NNE) (Enolase 1) (Phosphopyruvate hydratase) (C-myc promoter-binding protein) (MBP-1) (MPB-1) (Plasminogen-binding protein) | ENOA_HUMAN | 47021 | 100% | 10 | 11 | 16 | 0.15% | 35.80% |
| FTC133-p17 | (P06733) Alpha-enolase (EC 4.2.1.11) (2-phospho-D-glycerate hydro-lyase) (Non-neural enolase) (NNE) (Enolase 1) (Phosphopyruvate hydratase) (C-myc promoter-binding protein) (MBP-1) (MPB-1) (Plasminogen-binding protein) | ENOA_HUMAN | 47021 | 100% | 15 | 18 | 32 | 0.30% | 53.60% |
| FTC133-p17 | (P06733) Alpha-enolase (EC 4.2.1.11) (2-phospho-D-glycerate hydro-lyase) (Non-neural enolase) (NNE) (Enolase 1) (Phosphopyruvate hydratase) (C-myc promoter-binding protein) (MBP-1) (MPB-1) (Plasminogen-binding protein) | ENOA_HUMAN | 47021 | 100% | 14 | 19 | 45 | 0.42% | 52.70% |
| FTC133-p17 | (P06733) Alpha-enolase (EC 4.2.1.11) (2-phospho-D-glycerate hydro-lyase) (Non-neural enolase) (NNE) (Enolase 1) (Phosphopyruvate hydratase) (C-myc promoter-binding protein) (MBP-1) (MPB-1) (Plasminogen-binding protein) | ENOA_HUMAN | 47021 | 100% | 10 | 14 | 42 | 0.50% | 42.00% |
| FTC133-p17 | (P06733) Alpha-enolase (EC 4.2.1.11) (2-phospho-D-glycerate hydro-lyase) (Non-neural enolase) (NNE) (Enolase 1) (Phosphopyruvate hydratase) (C-myc promoter-binding protein) (MBP-1) (MPB-1) (Plasminogen-binding protein) | ENOA_HUMAN | 47021 | 100% | 5  | 5  | 7  | 0.12% | 13.90% |
| FTC133-p17 | (P06733) Alpha-enolase (EC 4.2.1.11) (2-phospho-D-glycerate hydro-lyase) (Non-neural enolase) (NNE) (Enolase 1) (Phosphopyruvate hydratase) (C-myc promoter-binding protein) (MBP-1) (MPB-1) (Plasminogen-binding protein) | ENOA_HUMAN | 47021 | 100% | 4  | 4  | 12 | 0.18% | 21.50% |
| FTC133-p17 | (P06733) Alpha-enolase (EC 4.2.1.11) (2-phospho-D-glycerate hydro-lyase) (Non-neural enolase) (NNE) (Enolase 1) (Phosphopyruvate hydratase) (C-myc promoter-binding protein) (MBP-1) (MPB-1) (Plasminogen-binding protein) | ENOA_HUMAN | 47021 | 100% | 14 | 17 | 42 | 0.40% | 52.20% |
| FTC133-p17 | (P06733) Alpha-enolase (EC 4.2.1.11) (2-phospho-D-glycerate hydro-lyase) (Non-neural enolase) (NNE) (Enolase 1) (Phosphopyruvate hydratase) (C-myc promoter-binding protein) (MBP-1) (MPB-1) (Plasminogen-binding protein) | ENOA_HUMAN | 47021 | 100% | 3  | 3  | 7  | 0.07% | 16.60% |
| FTC133-p17 | (P06733) Alpha-enolase (EC 4.2.1.11) (2-phospho-D-glycerate hydro-lyase) (Non-neural enolase) (NNE) (Enolase 1) (Phosphopyruvate hydratase) (C-myc promoter-binding protein) (MBP-1) (MPB-1) (Plasminogen-binding protein) | ENOA_HUMAN | 47021 | 100% | 3  | 4  | 4  | 0.03% | 13.40% |
| FTC133-p17 | (P06733) Alpha-enolase (EC 4.2.1.11) (2-phospho-D-glycerate hydro-lyase) (Non-neural enolase) (NNE) (Enolase 1) (Phosphopyruvate hydratase) (C-myc promoter-binding protein) (MBP-1) (MPB-1) (Plasminogen-binding protein) | ENOA_HUMAN | 47021 | 100% | 8  | 11 | 35 | 0.29% | 36.30% |
| FTC133-p17 | (P06733) Alpha-enolase (EC 4.2.1.11) (2-phospho-D-glycerate hydro-lyase) (Non-neural enolase) (NNE) (Enolase 1) (Phosphopyruvate hydratase) (C-myc promoter-binding protein) (MBP-1) (MPB-1) (Plasminogen-binding protein) | ENOA_HUMAN | 47021 | 100% | 6  | 8  | 12 | 0.10% | 25.90% |

## Protein Identified Sequence Coverage in FTC-133

|            |                                                                                                                                                   |            |       |      |   |   |    |       |        |
|------------|---------------------------------------------------------------------------------------------------------------------------------------------------|------------|-------|------|---|---|----|-------|--------|
| FTC133-p17 | (P06748) Nucleophosmin (NPM) (Nucleolar phosphoprotein B23) (Numatrin) (Nucleolar protein NO38)                                                   | NPM_HUMAN  | 32557 | 100% | 2 | 2 | 2  | 0.02% | 11.60% |
| FTC133-p17 | (P06748) Nucleophosmin (NPM) (Nucleolar phosphoprotein B23) (Numatrin) (Nucleolar protein NO38)                                                   | NPM_HUMAN  | 32557 | 100% | 3 | 4 | 5  | 0.05% | 18.40% |
| FTC133-p17 | (P06748) Nucleophosmin (NPM) (Nucleolar phosphoprotein B23) (Numatrin) (Nucleolar protein NO38)                                                   | NPM_HUMAN  | 32557 | 100% | 2 | 3 | 4  | 0.04% | 11.90% |
| FTC133-p17 | (P06748) Nucleophosmin (NPM) (Nucleolar phosphoprotein B23) (Numatrin) (Nucleolar protein NO38)                                                   | NPM_HUMAN  | 32557 | 100% | 2 | 2 | 2  | 0.02% | 11.20% |
| FTC133-p17 | (P06748) Nucleophosmin (NPM) (Nucleolar phosphoprotein B23) (Numatrin) (Nucleolar protein NO38)                                                   | NPM_HUMAN  | 32557 | 100% | 2 | 2 | 4  | 0.06% | 13.60% |
| FTC133-p17 | (P06748) Nucleophosmin (NPM) (Nucleolar phosphoprotein B23) (Numatrin) (Nucleolar protein NO38)                                                   | NPM_HUMAN  | 32557 | 100% | 3 | 4 | 6  | 0.06% | 18.40% |
| FTC133-p17 | (P06748) Nucleophosmin (NPM) (Nucleolar phosphoprotein B23) (Numatrin) (Nucleolar protein NO38)                                                   | NPM_HUMAN  | 32557 | 100% | 2 | 2 | 2  | 0.02% | 13.60% |
| FTC133-p17 | (P06748) Nucleophosmin (NPM) (Nucleolar phosphoprotein B23) (Numatrin) (Nucleolar protein NO38)                                                   | NPM_HUMAN  | 32557 | 100% | 3 | 4 | 6  | 0.05% | 18.40% |
| FTC133-p17 | (P06748) Nucleophosmin (NPM) (Nucleolar phosphoprotein B23) (Numatrin) (Nucleolar protein NO38)                                                   | NPM_HUMAN  | 32557 | 100% | 2 | 3 | 5  | 0.04% | 13.60% |
| FTC133-p17 | (P06753) Tropomyosin alpha-3 chain (Tropomyosin-3) (Tropomyosin gamma) (hTM5)                                                                     | TPM3_HUMAN | 32802 | 100% | 2 | 2 | 2  | 0.02% | 7.75%  |
| FTC133-p17 | (P06865) Beta-hexosaminidase alpha chain precursor (EC 3.2.1.52) (N-acetyl-beta-glucosaminidase) (Beta-N-acetylhexosaminidase) (Hexosaminidase A) | HEXA_HUMAN | 60672 | 100% | 6 | 6 | 8  | 0.08% | 12.50% |
| FTC133-p17 | (P06865) Beta-hexosaminidase alpha chain precursor (EC 3.2.1.52) (N-acetyl-beta-glucosaminidase) (Beta-N-acetylhexosaminidase) (Hexosaminidase A) | HEXA_HUMAN | 60672 | 100% | 8 | 8 | 14 | 0.13% | 15.90% |
| FTC133-p17 | (P06865) Beta-hexosaminidase alpha chain precursor (EC 3.2.1.52) (N-acetyl-beta-glucosaminidase) (Beta-N-acetylhexosaminidase) (Hexosaminidase A) | HEXA_HUMAN | 60672 | 100% | 9 | 9 | 13 | 0.12% | 19.10% |
| FTC133-p17 | (P06865) Beta-hexosaminidase alpha chain precursor (EC 3.2.1.52) (N-acetyl-beta-glucosaminidase) (Beta-N-acetylhexosaminidase) (Hexosaminidase A) | HEXA_HUMAN | 60672 | 100% | 6 | 6 | 8  | 0.10% | 14.70% |
| FTC133-p17 | (P06865) Beta-hexosaminidase alpha chain precursor (EC 3.2.1.52) (N-acetyl-beta-glucosaminidase) (Beta-N-acetylhexosaminidase) (Hexosaminidase A) | HEXA_HUMAN | 60672 | 100% | 9 | 9 | 18 | 0.17% | 19.80% |
| FTC133-p17 | (P06865) Beta-hexosaminidase alpha chain precursor (EC 3.2.1.52) (N-acetyl-beta-glucosaminidase) (Beta-N-acetylhexosaminidase) (Hexosaminidase A) | HEXA_HUMAN | 60672 | 100% | 2 | 2 | 2  | 0.02% | 8.13%  |
| FTC133-p17 | (P06865) Beta-hexosaminidase alpha chain precursor (EC 3.2.1.52) (N-acetyl-beta-glucosaminidase) (Beta-N-acetylhexosaminidase) (Hexosaminidase A) | HEXA_HUMAN | 60672 | 100% | 2 | 2 | 3  | 0.03% | 5.48%  |

## Protein Identified Sequence Coverage in FTC-133

|            |                                                                                                                                                        |             |       |      |    |    |    |       |        |
|------------|--------------------------------------------------------------------------------------------------------------------------------------------------------|-------------|-------|------|----|----|----|-------|--------|
| FTC133-p17 | (P07195) L-lactate dehydrogenase B chain (EC 1.1.1.27) (LDH-B) (LDH heart subunit) (LDH-H) (NY-REN-46 antigen)                                         | LDHB_HUMAN  | 36489 | 100% | 4  | 4  | 7  | 0.07% | 14.70% |
| FTC133-p17 | (P07195) L-lactate dehydrogenase B chain (EC 1.1.1.27) (LDH-B) (LDH heart subunit) (LDH-H) (NY-REN-46 antigen)                                         | LDHB_HUMAN  | 36489 | 100% | 5  | 5  | 6  | 0.06% | 18.30% |
| FTC133-p17 | (P07195) L-lactate dehydrogenase B chain (EC 1.1.1.27) (LDH-B) (LDH heart subunit) (LDH-H) (NY-REN-46 antigen)                                         | LDHB_HUMAN  | 36489 | 100% | 3  | 3  | 3  | 0.04% | 12.60% |
| FTC133-p17 | (P07195) L-lactate dehydrogenase B chain (EC 1.1.1.27) (LDH-B) (LDH heart subunit) (LDH-H) (NY-REN-46 antigen)                                         | LDHB_HUMAN  | 36489 | 100% | 3  | 3  | 3  | 0.03% | 10.50% |
| FTC133-p17 | (P07237) Protein disulfide-isomerase precursor (EC 5.3.4.1) (PDI) (Prolyl 4-hydroxylase beta subunit) (Cellular thyroid hormone-binding protein) (p55) | PDIA1_HUMAN | 57100 | 100% | 4  | 4  | 4  | 0.04% | 14.60% |
| FTC133-p17 | (P07237) Protein disulfide-isomerase precursor (EC 5.3.4.1) (PDI) (Prolyl 4-hydroxylase beta subunit) (Cellular thyroid hormone-binding protein) (p55) | PDIA1_HUMAN | 57100 | 100% | 2  | 2  | 2  | 0.02% | 6.50%  |
| FTC133-p17 | (P07237) Protein disulfide-isomerase precursor (EC 5.3.4.1) (PDI) (Prolyl 4-hydroxylase beta subunit) (Cellular thyroid hormone-binding protein) (p55) | PDIA1_HUMAN | 57100 | 100% | 3  | 3  | 3  | 0.03% | 8.07%  |
| FTC133-p17 | (P07339) Cathepsin D precursor (EC 3.4.23.5) [Contains: Cathepsin D light chain; Cathepsin D heavy chain]                                              | CATD_HUMAN  | 44535 | 100% | 4  | 4  | 9  | 0.09% | 16.00% |
| FTC133-p17 | (P07339) Cathepsin D precursor (EC 3.4.23.5) [Contains: Cathepsin D light chain; Cathepsin D heavy chain]                                              | CATD_HUMAN  | 44535 | 100% | 4  | 4  | 7  | 0.07% | 15.30% |
| FTC133-p17 | (P07339) Cathepsin D precursor (EC 3.4.23.5) [Contains: Cathepsin D light chain; Cathepsin D heavy chain]                                              | CATD_HUMAN  | 44535 | 100% | 5  | 5  | 16 | 0.15% | 18.00% |
| FTC133-p17 | (P07339) Cathepsin D precursor (EC 3.4.23.5) [Contains: Cathepsin D light chain; Cathepsin D heavy chain]                                              | CATD_HUMAN  | 44535 | 100% | 3  | 3  | 8  | 0.07% | 10.90% |
| FTC133-p17 | (P07339) Cathepsin D precursor (EC 3.4.23.5) [Contains: Cathepsin D light chain; Cathepsin D heavy chain]                                              | CATD_HUMAN  | 44535 | 100% | 8  | 9  | 16 | 0.15% | 28.40% |
| FTC133-p17 | (P07339) Cathepsin D precursor (EC 3.4.23.5) [Contains: Cathepsin D light chain; Cathepsin D heavy chain]                                              | CATD_HUMAN  | 44535 | 100% | 11 | 15 | 39 | 0.37% | 37.90% |
| FTC133-p17 | (P07339) Cathepsin D precursor (EC 3.4.23.5) [Contains: Cathepsin D light chain; Cathepsin D heavy chain]                                              | CATD_HUMAN  | 44535 | 100% | 13 | 16 | 56 | 0.52% | 45.40% |
| FTC133-p17 | (P07339) Cathepsin D precursor (EC 3.4.23.5) [Contains: Cathepsin D light chain; Cathepsin D heavy chain]                                              | CATD_HUMAN  | 44535 | 100% | 11 | 15 | 42 | 0.50% | 40.00% |
| FTC133-p17 | (P07339) Cathepsin D precursor (EC 3.4.23.5) [Contains: Cathepsin D light chain; Cathepsin D heavy chain]                                              | CATD_HUMAN  | 44535 | 100% | 3  | 3  | 7  | 0.11% | 14.60% |
| FTC133-p17 | (P07339) Cathepsin D precursor (EC 3.4.23.5) [Contains: Cathepsin D light chain; Cathepsin D heavy chain]                                              | CATD_HUMAN  | 44535 | 100% | 13 | 16 | 55 | 0.52% | 45.40% |
| FTC133-p17 | (P07339) Cathepsin D precursor (EC 3.4.23.5) [Contains: Cathepsin D light chain; Cathepsin D heavy chain]                                              | CATD_HUMAN  | 44535 | 100% | 3  | 3  | 11 | 0.11% | 14.60% |

Protein Identified Sequence Coverage in FTC-133

|            |                                                                                                                                                                   |             |       |      |    |    |    |       |        |
|------------|-------------------------------------------------------------------------------------------------------------------------------------------------------------------|-------------|-------|------|----|----|----|-------|--------|
| FTC133-p17 | (P07339) Cathepsin D precursor (EC 3.4.23.5)<br>[Contains: Cathepsin D light chain; Cathepsin D heavy chain]                                                      | CATD_HUMAN  | 44535 | 100% | 3  | 4  | 9  | 0.08% | 13.80% |
| FTC133-p17 | (P07339) Cathepsin D precursor (EC 3.4.23.5)<br>[Contains: Cathepsin D light chain; Cathepsin D heavy chain]                                                      | CATD_HUMAN  | 44535 | 100% | 3  | 4  | 8  | 0.07% | 14.60% |
| FTC133-p17 | (P07339) Cathepsin D precursor (EC 3.4.23.5)<br>[Contains: Cathepsin D light chain; Cathepsin D heavy chain]                                                      | CATD_HUMAN  | 44535 | 100% | 7  | 10 | 47 | 0.39% | 25.70% |
| FTC133-p17 | (P07339) Cathepsin D precursor (EC 3.4.23.5)<br>[Contains: Cathepsin D light chain; Cathepsin D heavy chain]                                                      | CATD_HUMAN  | 44535 | 100% | 3  | 4  | 7  | 0.06% | 11.70% |
| FTC133-p17 | (P07339) Cathepsin D precursor (EC 3.4.23.5)<br>[Contains: Cathepsin D light chain; Cathepsin D heavy chain]                                                      | CATD_HUMAN  | 44535 | 99%  | 2  | 2  | 2  | 0.02% | 7.28%  |
| FTC133-p17 | (P07355) Annexin A2 (Annexin II) (Lipocortin II)<br>(Calpactin I heavy chain) (Chromobindin-8) (p36)<br>(Protein I) (Placental anticoagulant protein IV) (PAP-IV) | ANXA2_HUMAN | 38457 | 100% | 7  | 7  | 7  | 0.06% | 21.30% |
| FTC133-p17 | (P07355) Annexin A2 (Annexin II) (Lipocortin II)<br>(Calpactin I heavy chain) (Chromobindin-8) (p36)<br>(Protein I) (Placental anticoagulant protein IV) (PAP-IV) | ANXA2_HUMAN | 38457 | 100% | 14 | 16 | 23 | 0.22% | 50.00% |
| FTC133-p17 | (P07355) Annexin A2 (Annexin II) (Lipocortin II)<br>(Calpactin I heavy chain) (Chromobindin-8) (p36)<br>(Protein I) (Placental anticoagulant protein IV) (PAP-IV) | ANXA2_HUMAN | 38457 | 100% | 15 | 19 | 42 | 0.40% | 47.90% |
| FTC133-p17 | (P07355) Annexin A2 (Annexin II) (Lipocortin II)<br>(Calpactin I heavy chain) (Chromobindin-8) (p36)<br>(Protein I) (Placental anticoagulant protein IV) (PAP-IV) | ANXA2_HUMAN | 38457 | 100% | 15 | 18 | 44 | 0.41% | 47.90% |
| FTC133-p17 | (P07355) Annexin A2 (Annexin II) (Lipocortin II)<br>(Calpactin I heavy chain) (Chromobindin-8) (p36)<br>(Protein I) (Placental anticoagulant protein IV) (PAP-IV) | ANXA2_HUMAN | 38457 | 100% | 10 | 12 | 25 | 0.30% | 31.10% |
| FTC133-p17 | (P07355) Annexin A2 (Annexin II) (Lipocortin II)<br>(Calpactin I heavy chain) (Chromobindin-8) (p36)<br>(Protein I) (Placental anticoagulant protein IV) (PAP-IV) | ANXA2_HUMAN | 38457 | 100% | 4  | 4  | 10 | 0.17% | 11.50% |
| FTC133-p17 | (P07355) Annexin A2 (Annexin II) (Lipocortin II)<br>(Calpactin I heavy chain) (Chromobindin-8) (p36)<br>(Protein I) (Placental anticoagulant protein IV) (PAP-IV) | ANXA2_HUMAN | 38457 | 100% | 16 | 19 | 44 | 0.42% | 52.70% |
| FTC133-p17 | (P07355) Annexin A2 (Annexin II) (Lipocortin II)<br>(Calpactin I heavy chain) (Chromobindin-8) (p36)<br>(Protein I) (Placental anticoagulant protein IV) (PAP-IV) | ANXA2_HUMAN | 38457 | 100% | 5  | 5  | 5  | 0.04% | 20.10% |
| FTC133-p17 | (P07355) Annexin A2 (Annexin II) (Lipocortin II)<br>(Calpactin I heavy chain) (Chromobindin-8) (p36)<br>(Protein I) (Placental anticoagulant protein IV) (PAP-IV) | ANXA2_HUMAN | 38457 | 100% | 4  | 5  | 17 | 0.14% | 14.50% |
| FTC133-p17 | (P07355) Annexin A2 (Annexin II) (Lipocortin II)<br>(Calpactin I heavy chain) (Chromobindin-8) (p36)<br>(Protein I) (Placental anticoagulant protein IV) (PAP-IV) | ANXA2_HUMAN | 38457 | 100% | 2  | 2  | 2  | 0.02% | 8.88%  |



Protein Identified Sequence Coverage in FTC-133

|            |                                                                                                                                                                                                                                                      |             |       |      |    |    |    |       |        |
|------------|------------------------------------------------------------------------------------------------------------------------------------------------------------------------------------------------------------------------------------------------------|-------------|-------|------|----|----|----|-------|--------|
| FTC133-p17 | (P07355) Annexin A2 (Annexin II) (Lipocortin II) (Calpactin I heavy chain) (Chromobindin-8) (p36) (Protein I) (Placental anticoagulant protein IV) (PAP-IV)                                                                                          | ANXA2_HUMAN | 38457 | 99%  | 2  | 2  | 3  | 0.03% | 4.73%  |
| FTC133-p17 | (P07437) Tubulin beta-2 chain                                                                                                                                                                                                                        | TBB2_HUMAN  | 49653 | 100% | 5  | 6  | 9  | 0.09% | 18.50% |
| FTC133-p17 | (P07437) Tubulin beta-2 chain                                                                                                                                                                                                                        | TBB2_HUMAN  | 49653 | 100% | 9  | 9  | 14 | 0.13% | 31.80% |
| FTC133-p17 | (P07437) Tubulin beta-2 chain                                                                                                                                                                                                                        | TBB2_HUMAN  | 49653 | 100% | 9  | 9  | 14 | 0.13% | 32.70% |
| FTC133-p17 | (P07437) Tubulin beta-2 chain                                                                                                                                                                                                                        | TBB2_HUMAN  | 49653 | 100% | 7  | 7  | 13 | 0.16% | 26.40% |
| FTC133-p17 | (P07437) Tubulin beta-2 chain                                                                                                                                                                                                                        | TBB2_HUMAN  | 49653 | 100% | 9  | 9  | 14 | 0.13% | 25.90% |
| FTC133-p17 | (P07437) Tubulin beta-2 chain                                                                                                                                                                                                                        | TBB2_HUMAN  | 49653 | 100% | 2  | 3  | 6  | 0.05% | 9.01%  |
| FTC133-p17 | (P07437) Tubulin beta-2 chain                                                                                                                                                                                                                        | TBB2_HUMAN  | 49653 | 100% | 6  | 6  | 10 | 0.08% | 17.30% |
| FTC133-p17 | (P07437) Tubulin beta-2 chain                                                                                                                                                                                                                        | TBB2_HUMAN  | 49653 | 99%  | 2  | 3  | 5  | 0.04% | 12.80% |
| FTC133-p17 | (P07602) Proactivator polypeptide precursor [Contains: Saposin A (Protein A); Saposin B-Val; Saposin B (Sphingolipid activator protein 1) (SAP-1) (Cerebroside sulfate activator) (CSAct) (Dispersin) (Sulfatide/GM1 activator); Saposin C (Co-beta- | SAP_HUMAN   | 58094 | 100% | 6  | 9  | 15 | 0.15% | 11.60% |
| FTC133-p17 | (P07602) Proactivator polypeptide precursor [Contains: Saposin A (Protein A); Saposin B-Val; Saposin B (Sphingolipid activator protein 1) (SAP-1) (Cerebroside sulfate activator) (CSAct) (Dispersin) (Sulfatide/GM1 activator); Saposin C (Co-beta- | SAP_HUMAN   | 58094 | 100% | 5  | 6  | 7  | 0.07% | 9.73%  |
| FTC133-p17 | (P07602) Proactivator polypeptide precursor [Contains: Saposin A (Protein A); Saposin B-Val; Saposin B (Sphingolipid activator protein 1) (SAP-1) (Cerebroside sulfate activator) (CSAct) (Dispersin) (Sulfatide/GM1 activator); Saposin C (Co-beta- | SAP_HUMAN   | 58094 | 100% | 7  | 8  | 9  | 0.09% | 12.80% |
| FTC133-p17 | (P07602) Proactivator polypeptide precursor [Contains: Saposin A (Protein A); Saposin B-Val; Saposin B (Sphingolipid activator protein 1) (SAP-1) (Cerebroside sulfate activator) (CSAct) (Dispersin) (Sulfatide/GM1 activator); Saposin C (Co-beta- | SAP_HUMAN   | 58094 | 100% | 5  | 6  | 12 | 0.11% | 11.80% |
| FTC133-p17 | (P07602) Proactivator polypeptide precursor [Contains: Saposin A (Protein A); Saposin B-Val; Saposin B (Sphingolipid activator protein 1) (SAP-1) (Cerebroside sulfate activator) (CSAct) (Dispersin) (Sulfatide/GM1 activator); Saposin C (Co-beta- | SAP_HUMAN   | 58094 | 100% | 9  | 10 | 25 | 0.24% | 17.70% |
| FTC133-p17 | (P07602) Proactivator polypeptide precursor [Contains: Saposin A (Protein A); Saposin B-Val; Saposin B (Sphingolipid activator protein 1) (SAP-1) (Cerebroside sulfate activator) (CSAct) (Dispersin) (Sulfatide/GM1 activator); Saposin C (Co-beta- | SAP_HUMAN   | 58094 | 100% | 15 | 17 | 43 | 0.40% | 32.60% |
| FTC133-p17 | (P07602) Proactivator polypeptide precursor [Contains: Saposin A (Protein A); Saposin B-Val; Saposin B (Sphingolipid activator protein 1) (SAP-1) (Cerebroside sulfate activator) (CSAct) (Dispersin) (Sulfatide/GM1 activator); Saposin C (Co-beta- | SAP_HUMAN   | 58094 | 100% | 16 | 18 | 76 | 0.70% | 35.70% |

## Protein Identified Sequence Coverage in FTC-133

|            |                                                                                                                                                                                                                                                                      |            |       |      |    |    |    |       |        |
|------------|----------------------------------------------------------------------------------------------------------------------------------------------------------------------------------------------------------------------------------------------------------------------|------------|-------|------|----|----|----|-------|--------|
| FTC133-p17 | (P07602) Proactivator polypeptide precursor<br>[Contains: Saposin A (Protein A); Saposin B-Val;<br>Saposin B (Sphingolipid activator protein 1) (SAP-1)<br>(Cerebroside sulfate activator) (CSAct) (Dispersin)<br>(Sulfatide/GM1 activator); Saposin C (Co-beta-     | SAP_HUMAN  | 58094 | 100% | 9  | 12 | 30 | 0.36% | 23.30% |
| FTC133-p17 | (P07602) Proactivator polypeptide precursor<br>[Contains: Saposin A (Protein A); Saposin B-Val;<br>Saposin B (Sphingolipid activator protein 1) (SAP-1)<br>(Cerebroside sulfate activator) (CSAct) (Dispersin)<br>(Sulfatide/GM1 activator); Saposin C (Co-beta-     | SAP_HUMAN  | 58094 | 100% | 4  | 5  | 17 | 0.29% | 8.59%  |
| FTC133-p17 | (P07602) Proactivator polypeptide precursor<br>[Contains: Saposin A (Protein A); Saposin B-Val;<br>Saposin B (Sphingolipid activator protein 1) (SAP-1)<br>(Cerebroside sulfate activator) (CSAct) (Dispersin)<br>(Sulfatide/GM1 activator); Saposin C (Co-beta-     | SAP_HUMAN  | 58094 | 100% | 2  | 2  | 9  | 0.14% | 7.82%  |
| FTC133-p17 | (P07602) Proactivator polypeptide precursor<br>[Contains: Saposin A (Protein A); Saposin B-Val;<br>Saposin B (Sphingolipid activator protein 1) (SAP-1)<br>(Cerebroside sulfate activator) (CSAct) (Dispersin)<br>(Sulfatide/GM1 activator); Saposin C (Co-beta-     | SAP_HUMAN  | 58094 | 100% | 10 | 12 | 75 | 0.71% | 22.70% |
| FTC133-p17 | (P07602) Proactivator polypeptide precursor<br>[Contains: Saposin A (Protein A); Saposin B-Val;<br>Saposin B (Sphingolipid activator protein 1) (SAP-1)<br>(Cerebroside sulfate activator) (CSAct) (Dispersin)<br>(Sulfatide/GM1 activator); Saposin C (Co-beta-     | SAP_HUMAN  | 58094 | 100% | 2  | 2  | 6  | 0.06% | 7.82%  |
| FTC133-p17 | (P07602) Proactivator polypeptide precursor<br>[Contains: Saposin A (Protein A); Saposin B-Val;<br>Saposin B (Sphingolipid activator protein 1) (SAP-1)<br>(Cerebroside sulfate activator) (CSAct) (Dispersin)<br>(Sulfatide/GM1 activator); Saposin C (Co-beta-     | SAP_HUMAN  | 58094 | 100% | 3  | 3  | 5  | 0.04% | 6.68%  |
| FTC133-p17 | (P07602) Proactivator polypeptide precursor<br>[Contains: Saposin A (Protein A); Saposin B-Val;<br>Saposin B (Sphingolipid activator protein 1) (SAP-1)<br>(Cerebroside sulfate activator) (CSAct) (Dispersin)<br>(Sulfatide/GM1 activator); Saposin C (Co-beta-     | SAP_HUMAN  | 58094 | 100% | 6  | 7  | 26 | 0.22% | 15.80% |
| FTC133-p17 | (P07686) Beta-hexosaminidase beta chain precursor<br>(EC 3.2.1.52) (N-acetyl-beta-glucosaminidase) (Beta-<br>N-acetylhexosaminidase) (Hexosaminidase B)<br>(Cervical cancer proto-oncogene 7) (HCC-7)<br>[Contains: Beta-hexosaminidase beta-B chain; Beta-<br>hexos | HEXB_HUMAN | 63095 | 100% | 5  | 5  | 7  | 0.07% | 12.90% |
| FTC133-p17 | (P07686) Beta-hexosaminidase beta chain precursor<br>(EC 3.2.1.52) (N-acetyl-beta-glucosaminidase) (Beta-<br>N-acetylhexosaminidase) (Hexosaminidase B)<br>(Cervical cancer proto-oncogene 7) (HCC-7)<br>[Contains: Beta-hexosaminidase beta-B chain; Beta-<br>hexos | HEXB_HUMAN | 63095 | 100% | 8  | 9  | 17 | 0.16% | 19.40% |

## Protein Identified Sequence Coverage in FTC-133

|            |                                                                                                                                                                                                                                                     |             |       |      |    |    |    |       |        |
|------------|-----------------------------------------------------------------------------------------------------------------------------------------------------------------------------------------------------------------------------------------------------|-------------|-------|------|----|----|----|-------|--------|
| FTC133-p17 | (P07686) Beta-hexosaminidase beta chain precursor (EC 3.2.1.52) (N-acetyl-beta-glucosaminidase) (Beta-N-acetylhexosaminidase) (Hexosaminidase B) (Cervical cancer proto-oncogene 7) (HCC-7) [Contains: Beta-hexosaminidase beta-B chain; Beta-hexos | HEXB_HUMAN  | 63095 | 100% | 11 | 12 | 23 | 0.21% | 26.40% |
| FTC133-p17 | (P07686) Beta-hexosaminidase beta chain precursor (EC 3.2.1.52) (N-acetyl-beta-glucosaminidase) (Beta-N-acetylhexosaminidase) (Hexosaminidase B) (Cervical cancer proto-oncogene 7) (HCC-7) [Contains: Beta-hexosaminidase beta-B chain; Beta-hexos | HEXB_HUMAN  | 63095 | 100% | 7  | 9  | 13 | 0.16% | 18.30% |
| FTC133-p17 | (P07686) Beta-hexosaminidase beta chain precursor (EC 3.2.1.52) (N-acetyl-beta-glucosaminidase) (Beta-N-acetylhexosaminidase) (Hexosaminidase B) (Cervical cancer proto-oncogene 7) (HCC-7) [Contains: Beta-hexosaminidase beta-B chain; Beta-hexos | HEXB_HUMAN  | 63095 | 100% | 2  | 2  | 4  | 0.07% | 3.24%  |
| FTC133-p17 | (P07686) Beta-hexosaminidase beta chain precursor (EC 3.2.1.52) (N-acetyl-beta-glucosaminidase) (Beta-N-acetylhexosaminidase) (Hexosaminidase B) (Cervical cancer proto-oncogene 7) (HCC-7) [Contains: Beta-hexosaminidase beta-B chain; Beta-hexos | HEXB_HUMAN  | 63095 | 100% | 9  | 10 | 16 | 0.15% | 23.00% |
| FTC133-p17 | (P07737) Profilin-1 (Profilin I)                                                                                                                                                                                                                    | PROF1_HUMAN | 14905 | 100% | 3  | 3  | 4  | 0.04% | 38.80% |
| FTC133-p17 | (P07737) Profilin-1 (Profilin I)                                                                                                                                                                                                                    | PROF1_HUMAN | 14905 | 100% | 4  | 4  | 7  | 0.06% | 38.80% |
| FTC133-p17 | (P07737) Profilin-1 (Profilin I)                                                                                                                                                                                                                    | PROF1_HUMAN | 14905 | 100% | 3  | 3  | 4  | 0.05% | 40.30% |
| FTC133-p17 | (P07737) Profilin-1 (Profilin I)                                                                                                                                                                                                                    | PROF1_HUMAN | 14905 | 100% | 3  | 3  | 4  | 0.04% | 41.70% |
| FTC133-p17 | (P07858) Cathepsin B precursor (EC 3.4.22.1) (Cathepsin B1) (APP secretase) (APPS) [Contains: Cathepsin B light chain; Cathepsin B heavy chain]                                                                                                     | CATB_HUMAN  | 37803 | 100% | 3  | 4  | 6  | 0.06% | 15.90% |
| FTC133-p17 | (P07858) Cathepsin B precursor (EC 3.4.22.1) (Cathepsin B1) (APP secretase) (APPS) [Contains: Cathepsin B light chain; Cathepsin B heavy chain]                                                                                                     | CATB_HUMAN  | 37803 | 100% | 5  | 5  | 7  | 0.06% | 22.10% |
| FTC133-p17 | (P07858) Cathepsin B precursor (EC 3.4.22.1) (Cathepsin B1) (APP secretase) (APPS) [Contains: Cathepsin B light chain; Cathepsin B heavy chain]                                                                                                     | CATB_HUMAN  | 37803 | 100% | 2  | 2  | 4  | 0.05% | 10.60% |
| FTC133-p17 | (P07858) Cathepsin B precursor (EC 3.4.22.1) (Cathepsin B1) (APP secretase) (APPS) [Contains: Cathepsin B light chain; Cathepsin B heavy chain]                                                                                                     | CATB_HUMAN  | 37803 | 100% | 2  | 2  | 4  | 0.07% | 8.55%  |
| FTC133-p17 | (P07858) Cathepsin B precursor (EC 3.4.22.1) (Cathepsin B1) (APP secretase) (APPS) [Contains: Cathepsin B light chain; Cathepsin B heavy chain]                                                                                                     | CATB_HUMAN  | 37803 | 100% | 2  | 2  | 2  | 0.03% | 11.20% |
| FTC133-p17 | (P07858) Cathepsin B precursor (EC 3.4.22.1) (Cathepsin B1) (APP secretase) (APPS) [Contains: Cathepsin B light chain; Cathepsin B heavy chain]                                                                                                     | CATB_HUMAN  | 37803 | 100% | 4  | 4  | 7  | 0.07% | 13.90% |

Protein Identified Sequence Coverage in FTC-133

|            |                                                                                                                                                                                                                               |             |        |      |    |    |    |       |        |
|------------|-------------------------------------------------------------------------------------------------------------------------------------------------------------------------------------------------------------------------------|-------------|--------|------|----|----|----|-------|--------|
| FTC133-p17 | (P07858) Cathepsin B precursor (EC 3.4.22.1) (Cathepsin B1) (APP secretase) (APPS) [Contains: Cathepsin B light chain; Cathepsin B heavy chain]                                                                               | CATB_HUMAN  | 37803  | 100% | 2  | 2  | 2  | 0.02% | 10.60% |
| FTC133-p17 | (P07900) Heat shock protein HSP 90-alpha (HSP 86) (NY-REN-38 antigen)                                                                                                                                                         | HS90A_HUMAN | 84514  | 100% | 4  | 4  | 5  | 0.05% | 7.39%  |
| FTC133-p17 | (P07900) Heat shock protein HSP 90-alpha (HSP 86) (NY-REN-38 antigen)                                                                                                                                                         | HS90A_HUMAN | 84514  | 100% | 8  | 8  | 14 | 0.13% | 12.30% |
| FTC133-p17 | (P07900) Heat shock protein HSP 90-alpha (HSP 86) (NY-REN-38 antigen)                                                                                                                                                         | HS90A_HUMAN | 84514  | 100% | 7  | 7  | 10 | 0.09% | 11.10% |
| FTC133-p17 | (P07900) Heat shock protein HSP 90-alpha (HSP 86) (NY-REN-38 antigen)                                                                                                                                                         | HS90A_HUMAN | 84514  | 100% | 5  | 5  | 10 | 0.12% | 8.07%  |
| FTC133-p17 | (P07900) Heat shock protein HSP 90-alpha (HSP 86) (NY-REN-38 antigen)                                                                                                                                                         | HS90A_HUMAN | 84514  | 100% | 6  | 6  | 10 | 0.09% | 9.71%  |
| FTC133-p17 | (P07942) Laminin beta-1 chain precursor (Laminin B1 chain)                                                                                                                                                                    | LAMB1_HUMAN | 198045 | 100% | 2  | 2  | 2  | 0.02% | 2.07%  |
| FTC133-p17 | (P07942) Laminin beta-1 chain precursor (Laminin B1 chain)                                                                                                                                                                    | LAMB1_HUMAN | 198045 | 100% | 2  | 3  | 3  | 0.03% | 2.07%  |
| FTC133-p17 | (P07942) Laminin beta-1 chain precursor (Laminin B1 chain)                                                                                                                                                                    | LAMB1_HUMAN | 198045 | 100% | 7  | 7  | 9  | 0.08% | 7.67%  |
| FTC133-p17 | (P07942) Laminin beta-1 chain precursor (Laminin B1 chain)                                                                                                                                                                    | LAMB1_HUMAN | 198045 | 100% | 10 | 11 | 11 | 0.10% | 10.60% |
| FTC133-p17 | (P07942) Laminin beta-1 chain precursor (Laminin B1 chain)                                                                                                                                                                    | LAMB1_HUMAN | 198045 | 100% | 6  | 6  | 6  | 0.07% | 6.61%  |
| FTC133-p17 | (P07942) Laminin beta-1 chain precursor (Laminin B1 chain)                                                                                                                                                                    | LAMB1_HUMAN | 198045 | 100% | 2  | 2  | 2  | 0.03% | 2.35%  |
| FTC133-p17 | (P07942) Laminin beta-1 chain precursor (Laminin B1 chain)                                                                                                                                                                    | LAMB1_HUMAN | 198045 | 100% | 6  | 6  | 9  | 0.14% | 7.39%  |
| FTC133-p17 | (P07942) Laminin beta-1 chain precursor (Laminin B1 chain)                                                                                                                                                                    | LAMB1_HUMAN | 198045 | 100% | 11 | 11 | 11 | 0.10% | 11.10% |
| FTC133-p17 | (P07942) Laminin beta-1 chain precursor (Laminin B1 chain)                                                                                                                                                                    | LAMB1_HUMAN | 198045 | 100% | 4  | 4  | 5  | 0.05% | 5.32%  |
| FTC133-p17 | (P07942) Laminin beta-1 chain precursor (Laminin B1 chain)                                                                                                                                                                    | LAMB1_HUMAN | 198045 | 99%  | 2  | 3  | 5  | 0.04% | 2.91%  |
| FTC133-p17 | (P08174) Complement decay-accelerating factor precursor (CD55 antigen)                                                                                                                                                        | DAF_HUMAN   | 41382  | 100% | 2  | 2  | 2  | 0.02% | 5.25%  |
| FTC133-p17 | (P08572) Collagen alpha-2(IV) chain precursor                                                                                                                                                                                 | CO4A2_HUMAN | 167522 | 100% | 2  | 2  | 4  | 0.04% | 1.75%  |
| FTC133-p17 | (P08572) Collagen alpha-2(IV) chain precursor                                                                                                                                                                                 | CO4A2_HUMAN | 167522 | 100% | 2  | 2  | 2  | 0.02% | 1.75%  |
| FTC133-p17 | (P08670) Vimentin                                                                                                                                                                                                             | VIME_HUMAN  | 53503  | 100% | 2  | 2  | 2  | 0.02% | 4.52%  |
| FTC133-p17 | (P08670) Vimentin                                                                                                                                                                                                             | VIME_HUMAN  | 53503  | 100% | 2  | 2  | 2  | 0.03% | 8.60%  |
| FTC133-p17 | (P08758) Annexin A5 (Annexin V) (Lipocortin V) (Endonexin II) (Calphobindin I) (CBP-I) (Placental anticoagulant protein I) (PAP-I) (PP4) (Thromboplastin inhibitor) (Vascular anticoagulant-alpha) (VAC-alpha) (Anchorin CII) | ANXA5_HUMAN | 35789  | 100% | 10 | 10 | 13 | 0.12% | 42.30% |
| FTC133-p17 | (P08758) Annexin A5 (Annexin V) (Lipocortin V) (Endonexin II) (Calphobindin I) (CBP-I) (Placental anticoagulant protein I) (PAP-I) (PP4) (Thromboplastin inhibitor) (Vascular anticoagulant-alpha) (VAC-alpha) (Anchorin CII) | ANXA5_HUMAN | 35789  | 100% | 13 | 14 | 26 | 0.25% | 53.00% |
| FTC133-p17 | (P08758) Annexin A5 (Annexin V) (Lipocortin V) (Endonexin II) (Calphobindin I) (CBP-I) (Placental anticoagulant protein I) (PAP-I) (PP4) (Thromboplastin inhibitor) (Vascular anticoagulant-alpha) (VAC-alpha) (Anchorin CII) | ANXA5_HUMAN | 35789  | 100% | 14 | 15 | 31 | 0.29% | 55.50% |

|            |                                                                                                                                                                                                                               |             |       |      |    |    |    |       |        |
|------------|-------------------------------------------------------------------------------------------------------------------------------------------------------------------------------------------------------------------------------|-------------|-------|------|----|----|----|-------|--------|
| FTC133-p17 | (P08758) Annexin A5 (Annexin V) (Lipocortin V) (Endonexin II) (Calphobindin I) (CBP-I) (Placental anticoagulant protein I) (PAP-I) (PP4) (Thromboplastin inhibitor) (Vascular anticoagulant-alpha) (VAC-alpha) (Anchorin CII) | ANXA5_HUMAN | 35789 | 100% | 12 | 14 | 25 | 0.30% | 46.70% |
| FTC133-p17 | (P08758) Annexin A5 (Annexin V) (Lipocortin V) (Endonexin II) (Calphobindin I) (CBP-I) (Placental anticoagulant protein I) (PAP-I) (PP4) (Thromboplastin inhibitor) (Vascular anticoagulant-alpha) (VAC-alpha) (Anchorin CII) | ANXA5_HUMAN | 35789 | 100% | 2  | 2  | 2  | 0.03% | 15.70% |
| FTC133-p17 | (P08758) Annexin A5 (Annexin V) (Lipocortin V) (Endonexin II) (Calphobindin I) (CBP-I) (Placental anticoagulant protein I) (PAP-I) (PP4) (Thromboplastin inhibitor) (Vascular anticoagulant-alpha) (VAC-alpha) (Anchorin CII) | ANXA5_HUMAN | 35789 | 100% | 10 | 13 | 28 | 0.26% | 42.30% |
| FTC133-p17 | (P08758) Annexin A5 (Annexin V) (Lipocortin V) (Endonexin II) (Calphobindin I) (CBP-I) (Placental anticoagulant protein I) (PAP-I) (PP4) (Thromboplastin inhibitor) (Vascular anticoagulant-alpha) (VAC-alpha) (Anchorin CII) | ANXA5_HUMAN | 35789 | 100% | 2  | 2  | 2  | 0.02% | 15.70% |
| FTC133-p17 | (P08758) Annexin A5 (Annexin V) (Lipocortin V) (Endonexin II) (Calphobindin I) (CBP-I) (Placental anticoagulant protein I) (PAP-I) (PP4) (Thromboplastin inhibitor) (Vascular anticoagulant-alpha) (VAC-alpha) (Anchorin CII) | ANXA5_HUMAN | 35789 | 100% | 5  | 8  | 21 | 0.18% | 23.20% |
| FTC133-p17 | (P08865) 40S ribosomal protein SA (p40) (34/67 kDa laminin receptor) (Colon carcinoma laminin-binding protein) (NEM/1CHD4) (Multidrug resistance-associated protein MGr1-Ag)                                                  | RSSA_HUMAN  | 32705 | 100% | 6  | 8  | 15 | 0.14% | 30.60% |
| FTC133-p17 | (P08865) 40S ribosomal protein SA (p40) (34/67 kDa laminin receptor) (Colon carcinoma laminin-binding protein) (NEM/1CHD4) (Multidrug resistance-associated protein MGr1-Ag)                                                  | RSSA_HUMAN  | 32705 | 100% | 10 | 13 | 20 | 0.19% | 47.30% |
| FTC133-p17 | (P08865) 40S ribosomal protein SA (p40) (34/67 kDa laminin receptor) (Colon carcinoma laminin-binding protein) (NEM/1CHD4) (Multidrug resistance-associated protein MGr1-Ag)                                                  | RSSA_HUMAN  | 32705 | 100% | 9  | 10 | 25 | 0.23% | 42.50% |
| FTC133-p17 | (P08865) 40S ribosomal protein SA (p40) (34/67 kDa laminin receptor) (Colon carcinoma laminin-binding protein) (NEM/1CHD4) (Multidrug resistance-associated protein MGr1-Ag)                                                  | RSSA_HUMAN  | 32705 | 100% | 7  | 9  | 18 | 0.22% | 35.40% |
| FTC133-p17 | (P08865) 40S ribosomal protein SA (p40) (34/67 kDa laminin receptor) (Colon carcinoma laminin-binding protein) (NEM/1CHD4) (Multidrug resistance-associated protein MGr1-Ag)                                                  | RSSA_HUMAN  | 32705 | 100% | 2  | 3  | 7  | 0.11% | 17.00% |
| FTC133-p17 | (P08865) 40S ribosomal protein SA (p40) (34/67 kDa laminin receptor) (Colon carcinoma laminin-binding protein) (NEM/1CHD4) (Multidrug resistance-associated protein MGr1-Ag)                                                  | RSSA_HUMAN  | 32705 | 100% | 9  | 11 | 32 | 0.30% | 42.50% |
| FTC133-p17 | (P08865) 40S ribosomal protein SA (p40) (34/67 kDa laminin receptor) (Colon carcinoma laminin-binding protein) (NEM/1CHD4) (Multidrug resistance-associated protein MGr1-Ag)                                                  | RSSA_HUMAN  | 32705 | 100% | 2  | 3  | 3  | 0.03% | 12.60% |
| FTC133-p17 | (P08865) 40S ribosomal protein SA (p40) (34/67 kDa laminin receptor) (Colon carcinoma laminin-binding protein) (NEM/1CHD4) (Multidrug resistance-associated protein MGr1-Ag)                                                  | RSSA_HUMAN  | 32705 | 100% | 3  | 4  | 8  | 0.07% | 13.60% |

## Protein Identified Sequence Coverage in FTC-133

|            |                                                                                                                                                                                                                                |             |       |      |   |   |    |       |        |
|------------|--------------------------------------------------------------------------------------------------------------------------------------------------------------------------------------------------------------------------------|-------------|-------|------|---|---|----|-------|--------|
| FTC133-p17 | (P08865) 40S ribosomal protein SA (p40) (34/67 kDa laminin receptor) (Colon carcinoma laminin-binding protein) (NEM/1CHD4) (Multidrug resistance-associated protein MGr1-Ag)                                                   | RSSA_HUMAN  | 32705 | 100% | 2 | 2 | 7  | 0.06% | 17.00% |
| FTC133-p17 | (P09104) Gamma-enolase (EC 4.2.1.11) (2-phospho-D-glycerate hydro-lyase) (Neural enolase) (Neuron-specific enolase) (NSE) (Enolase 2)                                                                                          | ENOG_HUMAN  | 47121 | 100% | 2 | 2 | 2  | 0.02% | 18.20% |
| FTC133-p17 | (P09104) Gamma-enolase (EC 4.2.1.11) (2-phospho-D-glycerate hydro-lyase) (Neural enolase) (Neuron-specific enolase) (NSE) (Enolase 2)                                                                                          | ENOG_HUMAN  | 47121 | 100% | 3 | 3 | 3  | 0.03% | 20.10% |
| FTC133-p17 | (P09104) Gamma-enolase (EC 4.2.1.11) (2-phospho-D-glycerate hydro-lyase) (Neural enolase) (Neuron-specific enolase) (NSE) (Enolase 2)                                                                                          | ENOG_HUMAN  | 47121 | 100% | 3 | 3 | 3  | 0.04% | 22.20% |
| FTC133-p17 | (P09382) Galectin-1 (Lectin galactoside-binding soluble 1) (Beta-galactoside-binding lectin L-14-l) (Lactose-binding lectin 1) (S-Lac lectin 1) (Galaptin) (14 kDa lectin) (HPL) (HBL) (Putative MAPK-activating protein MP12) | LEG1_HUMAN  | 14567 | 100% | 2 | 2 | 4  | 0.04% | 17.90% |
| FTC133-p17 | (P09382) Galectin-1 (Lectin galactoside-binding soluble 1) (Beta-galactoside-binding lectin L-14-l) (Lactose-binding lectin 1) (S-Lac lectin 1) (Galaptin) (14 kDa lectin) (HPL) (HBL) (Putative MAPK-activating protein MP12) | LEG1_HUMAN  | 14567 | 100% | 5 | 5 | 6  | 0.06% | 54.50% |
| FTC133-p17 | (P09382) Galectin-1 (Lectin galactoside-binding soluble 1) (Beta-galactoside-binding lectin L-14-l) (Lactose-binding lectin 1) (S-Lac lectin 1) (Galaptin) (14 kDa lectin) (HPL) (HBL) (Putative MAPK-activating protein MP12) | LEG1_HUMAN  | 14567 | 100% | 3 | 3 | 5  | 0.06% | 37.30% |
| FTC133-p17 | (P09382) Galectin-1 (Lectin galactoside-binding soluble 1) (Beta-galactoside-binding lectin L-14-l) (Lactose-binding lectin 1) (S-Lac lectin 1) (Galaptin) (14 kDa lectin) (HPL) (HBL) (Putative MAPK-activating protein MP12) | LEG1_HUMAN  | 14567 | 100% | 2 | 2 | 4  | 0.04% | 17.90% |
| FTC133-p17 | (P09429) High mobility group protein B1 (High mobility group protein 1) (HMG-1)                                                                                                                                                | HMGB1_HUMAN | 24746 | 100% | 4 | 4 | 5  | 0.05% | 18.70% |
| FTC133-p17 | (P09429) High mobility group protein B1 (High mobility group protein 1) (HMG-1)                                                                                                                                                | HMGB1_HUMAN | 24746 | 100% | 5 | 6 | 7  | 0.06% | 19.20% |
| FTC133-p17 | (P09429) High mobility group protein B1 (High mobility group protein 1) (HMG-1)                                                                                                                                                | HMGB1_HUMAN | 24746 | 100% | 2 | 2 | 3  | 0.04% | 11.70% |
| FTC133-p17 | (P09429) High mobility group protein B1 (High mobility group protein 1) (HMG-1)                                                                                                                                                | HMGB1_HUMAN | 24746 | 100% | 2 | 3 | 5  | 0.08% | 7.01%  |
| FTC133-p17 | (P09429) High mobility group protein B1 (High mobility group protein 1) (HMG-1)                                                                                                                                                | HMGB1_HUMAN | 24746 | 100% | 2 | 2 | 2  | 0.02% | 12.10% |
| FTC133-p17 | (P09661) U2 small nuclear ribonucleoprotein A' (U2 snRNP-A')                                                                                                                                                                   | RU2A_HUMAN  | 28399 | 100% | 2 | 2 | 2  | 0.02% | 9.02%  |
| FTC133-p17 | (P0C0S5) Histone H2A.Z (H2A/z)                                                                                                                                                                                                 | H2AZ_HUMAN  | 13404 | 100% | 2 | 2 | 4  | 0.04% | 12.60% |
| FTC133-p17 | (P0C0S5) Histone H2A.Z (H2A/z)                                                                                                                                                                                                 | H2AZ_HUMAN  | 13404 | 100% | 2 | 2 | 4  | 0.04% | 12.60% |
| FTC133-p17 | (P0C0S5) Histone H2A.Z (H2A/z)                                                                                                                                                                                                 | H2AZ_HUMAN  | 13404 | 100% | 2 | 2 | 5  | 0.05% | 12.60% |
| FTC133-p17 | (P0C0S5) Histone H2A.Z (H2A/z)                                                                                                                                                                                                 | H2AZ_HUMAN  | 13404 | 100% | 2 | 2 | 15 | 0.14% | 12.60% |
| FTC133-p17 | (P0C0S5) Histone H2A.Z (H2A/z)                                                                                                                                                                                                 | H2AZ_HUMAN  | 13404 | 100% | 2 | 2 | 4  | 0.03% | 15.00% |

## Protein Identified Sequence Coverage in FTC-133

|            |                                                                                                                                                                                                                                               |            |        |      |   |   |    |       |        |
|------------|-----------------------------------------------------------------------------------------------------------------------------------------------------------------------------------------------------------------------------------------------|------------|--------|------|---|---|----|-------|--------|
| FTC133-p17 | (P10253) Lysosomal alpha-glucosidase precursor (EC 3.2.1.20) (Acid maltase) (Aglucosidase alfa) [Contains: 76 kDa lysosomal alpha-glucosidase; 70 kDa lysosomal alpha-glucosidase]                                                            | LYAG_HUMAN | 105321 | 99%  | 2 | 2 | 2  | 0.02% | 4.52%  |
| FTC133-p17 | (P10619) Lysosomal protective protein precursor (EC 3.4.16.5) (Cathepsin A) (Carboxypeptidase C) (Protective protein for beta-galactosidase) [Contains: Lysosomal protective protein 32 kDa chain; Lysosomal protective protein 20 kDa chain] | PPGB_HUMAN | 54450  | 100% | 4 | 4 | 5  | 0.05% | 10.00% |
| FTC133-p17 | (P10619) Lysosomal protective protein precursor (EC 3.4.16.5) (Cathepsin A) (Carboxypeptidase C) (Protective protein for beta-galactosidase) [Contains: Lysosomal protective protein 32 kDa chain; Lysosomal protective protein 20 kDa chain] | PPGB_HUMAN | 54450  | 100% | 7 | 7 | 10 | 0.09% | 16.00% |
| FTC133-p17 | (P10619) Lysosomal protective protein precursor (EC 3.4.16.5) (Cathepsin A) (Carboxypeptidase C) (Protective protein for beta-galactosidase) [Contains: Lysosomal protective protein 32 kDa chain; Lysosomal protective protein 20 kDa chain] | PPGB_HUMAN | 54450  | 100% | 3 | 3 | 6  | 0.06% | 7.71%  |
| FTC133-p17 | (P10619) Lysosomal protective protein precursor (EC 3.4.16.5) (Cathepsin A) (Carboxypeptidase C) (Protective protein for beta-galactosidase) [Contains: Lysosomal protective protein 32 kDa chain; Lysosomal protective protein 20 kDa chain] | PPGB_HUMAN | 54450  | 100% | 3 | 3 | 6  | 0.07% | 7.71%  |
| FTC133-p17 | (P10619) Lysosomal protective protein precursor (EC 3.4.16.5) (Cathepsin A) (Carboxypeptidase C) (Protective protein for beta-galactosidase) [Contains: Lysosomal protective protein 32 kDa chain; Lysosomal protective protein 20 kDa chain] | PPGB_HUMAN | 54450  | 100% | 5 | 6 | 11 | 0.10% | 12.90% |
| FTC133-p17 | (P10809) 60 kDa heat shock protein, mitochondrial precursor (Hsp60) (60 kDa chaperonin) (CPN60) (Heat shock protein 60) (HSP-60) (Mitochondrial matrix protein P1) (P60 lymphocyte protein) (HuCHA60)                                         | CH60_HUMAN | 61038  | 100% | 2 | 3 | 5  | 0.05% | 6.81%  |
| FTC133-p17 | (P10809) 60 kDa heat shock protein, mitochondrial precursor (Hsp60) (60 kDa chaperonin) (CPN60) (Heat shock protein 60) (HSP-60) (Mitochondrial matrix protein P1) (P60 lymphocyte protein) (HuCHA60)                                         | CH60_HUMAN | 61038  | 100% | 3 | 3 | 3  | 0.03% | 11.70% |
| FTC133-p17 | (P10809) 60 kDa heat shock protein, mitochondrial precursor (Hsp60) (60 kDa chaperonin) (CPN60) (Heat shock protein 60) (HSP-60) (Mitochondrial matrix protein P1) (P60 lymphocyte protein) (HuCHA60)                                         | CH60_HUMAN | 61038  | 100% | 2 | 3 | 3  | 0.04% | 6.81%  |
| FTC133-p17 | (P10809) 60 kDa heat shock protein, mitochondrial precursor (Hsp60) (60 kDa chaperonin) (CPN60) (Heat shock protein 60) (HSP-60) (Mitochondrial matrix protein P1) (P60 lymphocyte protein) (HuCHA60)                                         | CH60_HUMAN | 61038  | 100% | 2 | 2 | 3  | 0.05% | 8.03%  |

## Protein Identified Sequence Coverage in FTC-133

|            |                                                                                                                                                                                                       |             |        |      |    |    |    |       |        |
|------------|-------------------------------------------------------------------------------------------------------------------------------------------------------------------------------------------------------|-------------|--------|------|----|----|----|-------|--------|
| FTC133-p17 | (P10809) 60 kDa heat shock protein, mitochondrial precursor (Hsp60) (60 kDa chaperonin) (CPN60) (Heat shock protein 60) (HSP-60) (Mitochondrial matrix protein P1) (P60 lymphocyte protein) (HuCHA60) | CH60_HUMAN  | 61038  | 100% | 2  | 3  | 4  | 0.04% | 8.55%  |
| FTC133-p17 | (P10809) 60 kDa heat shock protein, mitochondrial precursor (Hsp60) (60 kDa chaperonin) (CPN60) (Heat shock protein 60) (HSP-60) (Mitochondrial matrix protein P1) (P60 lymphocyte protein) (HuCHA60) | CH60_HUMAN  | 61038  | 100% | 2  | 3  | 4  | 0.03% | 6.11%  |
| FTC133-p17 | (P10809) 60 kDa heat shock protein, mitochondrial precursor (Hsp60) (60 kDa chaperonin) (CPN60) (Heat shock protein 60) (HSP-60) (Mitochondrial matrix protein P1) (P60 lymphocyte protein) (HuCHA60) | CH60_HUMAN  | 61038  | 100% | 2  | 2  | 2  | 0.02% | 10.10% |
| FTC133-p17 | (P10809) 60 kDa heat shock protein, mitochondrial precursor (Hsp60) (60 kDa chaperonin) (CPN60) (Heat shock protein 60) (HSP-60) (Mitochondrial matrix protein P1) (P60 lymphocyte protein) (HuCHA60) | CH60_HUMAN  | 61038  | 100% | 2  | 2  | 3  | 0.03% | 8.03%  |
| FTC133-p17 | (P11021) 78 kDa glucose-regulated protein precursor (GRP 78) (Immunoglobulin heavy chain-binding protein) (BiP) (Endoplasmic reticulum lumenal Ca(2+)-binding protein grp78)                          | GRP78_HUMAN | 72317  | 100% | 8  | 8  | 12 | 0.11% | 16.80% |
| FTC133-p17 | (P11021) 78 kDa glucose-regulated protein precursor (GRP 78) (Immunoglobulin heavy chain-binding protein) (BiP) (Endoplasmic reticulum lumenal Ca(2+)-binding protein grp78)                          | GRP78_HUMAN | 72317  | 100% | 16 | 17 | 26 | 0.25% | 30.60% |
| FTC133-p17 | (P11021) 78 kDa glucose-regulated protein precursor (GRP 78) (Immunoglobulin heavy chain-binding protein) (BiP) (Endoplasmic reticulum lumenal Ca(2+)-binding protein grp78)                          | GRP78_HUMAN | 72317  | 100% | 19 | 22 | 37 | 0.34% | 40.70% |
| FTC133-p17 | (P11021) 78 kDa glucose-regulated protein precursor (GRP 78) (Immunoglobulin heavy chain-binding protein) (BiP) (Endoplasmic reticulum lumenal Ca(2+)-binding protein grp78)                          | GRP78_HUMAN | 72317  | 100% | 14 | 16 | 23 | 0.28% | 28.70% |
| FTC133-p17 | (P11021) 78 kDa glucose-regulated protein precursor (GRP 78) (Immunoglobulin heavy chain-binding protein) (BiP) (Endoplasmic reticulum lumenal Ca(2+)-binding protein grp78)                          | GRP78_HUMAN | 72317  | 100% | 2  | 2  | 5  | 0.08% | 5.96%  |
| FTC133-p17 | (P11021) 78 kDa glucose-regulated protein precursor (GRP 78) (Immunoglobulin heavy chain-binding protein) (BiP) (Endoplasmic reticulum lumenal Ca(2+)-binding protein grp78)                          | GRP78_HUMAN | 72317  | 100% | 17 | 18 | 28 | 0.26% | 34.10% |
| FTC133-p17 | (P11021) 78 kDa glucose-regulated protein precursor (GRP 78) (Immunoglobulin heavy chain-binding protein) (BiP) (Endoplasmic reticulum lumenal Ca(2+)-binding protein grp78)                          | GRP78_HUMAN | 72317  | 100% | 2  | 2  | 4  | 0.04% | 5.96%  |
| FTC133-p17 | (P11021) 78 kDa glucose-regulated protein precursor (GRP 78) (Immunoglobulin heavy chain-binding protein) (BiP) (Endoplasmic reticulum lumenal Ca(2+)-binding protein grp78)                          | GRP78_HUMAN | 72317  | 100% | 4  | 4  | 4  | 0.03% | 9.02%  |
| FTC133-p17 | (P11047) Laminin gamma-1 chain precursor (Laminin B2 chain)                                                                                                                                           | LAMC1_HUMAN | 177587 | 100% | 2  | 2  | 2  | 0.02% | 1.99%  |
| FTC133-p17 | (P11047) Laminin gamma-1 chain precursor (Laminin B2 chain)                                                                                                                                           | LAMC1_HUMAN | 177587 | 100% | 4  | 4  | 4  | 0.04% | 2.98%  |



## Protein Identified Sequence Coverage in FTC-133

|            |                                                                                          |             |        |      |   |    |    |       |        |
|------------|------------------------------------------------------------------------------------------|-------------|--------|------|---|----|----|-------|--------|
| FTC133-p17 | (P11047) Laminin gamma-1 chain precursor (Laminin B2 chain)                              | LAMC1_HUMAN | 177587 | 100% | 3 | 3  | 3  | 0.03% | 2.67%  |
| FTC133-p17 | (P11047) Laminin gamma-1 chain precursor (Laminin B2 chain)                              | LAMC1_HUMAN | 177587 | 100% | 2 | 2  | 2  | 0.02% | 1.80%  |
| FTC133-p17 | (P11047) Laminin gamma-1 chain precursor (Laminin B2 chain)                              | LAMC1_HUMAN | 177587 | 100% | 2 | 2  | 2  | 0.02% | 1.93%  |
| FTC133-p17 | (P11117) Lysosomal acid phosphatase precursor (EC 3.1.3.2) (LAP)                         | PPAL_HUMAN  | 48299  | 100% | 2 | 2  | 2  | 0.02% | 7.57%  |
| FTC133-p17 | (P11117) Lysosomal acid phosphatase precursor (EC 3.1.3.2) (LAP)                         | PPAL_HUMAN  | 48299  | 100% | 2 | 2  | 2  | 0.02% | 7.57%  |
| FTC133-p17 | (P11117) Lysosomal acid phosphatase precursor (EC 3.1.3.2) (LAP)                         | PPAL_HUMAN  | 48299  | 100% | 2 | 2  | 2  | 0.02% | 5.44%  |
| FTC133-p17 | (P11142) Heat shock cognate 71 kDa protein (Heat shock 70 kDa protein 8)                 | HSP7C_HUMAN | 70882  | 100% | 8 | 8  | 15 | 0.14% | 22.90% |
| FTC133-p17 | (P11142) Heat shock cognate 71 kDa protein (Heat shock 70 kDa protein 8)                 | HSP7C_HUMAN | 70882  | 100% | 7 | 7  | 7  | 0.06% | 19.50% |
| FTC133-p17 | (P11142) Heat shock cognate 71 kDa protein (Heat shock 70 kDa protein 8)                 | HSP7C_HUMAN | 70882  | 100% | 7 | 7  | 8  | 0.10% | 18.00% |
| FTC133-p17 | (P11142) Heat shock cognate 71 kDa protein (Heat shock 70 kDa protein 8)                 | HSP7C_HUMAN | 70882  | 100% | 5 | 6  | 6  | 0.06% | 13.90% |
| FTC133-p17 | (P11279) Lysosome-associated membrane glycoprotein 1 precursor (LAMP-1) (CD107a antigen) | LAMP1_HUMAN | 44756  | 100% | 4 | 5  | 7  | 0.07% | 10.60% |
| FTC133-p17 | (P11279) Lysosome-associated membrane glycoprotein 1 precursor (LAMP-1) (CD107a antigen) | LAMP1_HUMAN | 44756  | 100% | 4 | 5  | 5  | 0.05% | 10.60% |
| FTC133-p17 | (P11279) Lysosome-associated membrane glycoprotein 1 precursor (LAMP-1) (CD107a antigen) | LAMP1_HUMAN | 44756  | 100% | 5 | 6  | 6  | 0.06% | 11.80% |
| FTC133-p17 | (P11279) Lysosome-associated membrane glycoprotein 1 precursor (LAMP-1) (CD107a antigen) | LAMP1_HUMAN | 44756  | 100% | 3 | 3  | 6  | 0.06% | 9.38%  |
| FTC133-p17 | (P11279) Lysosome-associated membrane glycoprotein 1 precursor (LAMP-1) (CD107a antigen) | LAMP1_HUMAN | 44756  | 100% | 2 | 2  | 2  | 0.02% | 9.38%  |
| FTC133-p17 | (P11532) Dystrophin                                                                      | DMD_HUMAN   | 426673 | 100% | 2 | 2  | 2  | 0.02% | 0.87%  |
| FTC133-p17 | (P12109) Collagen alpha-1(VI) chain precursor                                            | CO6A1_HUMAN | 108531 | 100% | 3 | 3  | 5  | 0.05% | 4.18%  |
| FTC133-p17 | (P12109) Collagen alpha-1(VI) chain precursor                                            | CO6A1_HUMAN | 108531 | 100% | 7 | 7  | 10 | 0.09% | 10.70% |
| FTC133-p17 | (P12109) Collagen alpha-1(VI) chain precursor                                            | CO6A1_HUMAN | 108531 | 100% | 9 | 11 | 13 | 0.12% | 14.10% |
| FTC133-p17 | (P12109) Collagen alpha-1(VI) chain precursor                                            | CO6A1_HUMAN | 108531 | 100% | 7 | 7  | 11 | 0.13% | 11.90% |
| FTC133-p17 | (P12109) Collagen alpha-1(VI) chain precursor                                            | CO6A1_HUMAN | 108531 | 100% | 3 | 3  | 5  | 0.08% | 8.27%  |
| FTC133-p17 | (P12109) Collagen alpha-1(VI) chain precursor                                            | CO6A1_HUMAN | 108531 | 100% | 9 | 12 | 18 | 0.17% | 13.00% |
| FTC133-p17 | (P12109) Collagen alpha-1(VI) chain precursor                                            | CO6A1_HUMAN | 108531 | 100% | 3 | 3  | 3  | 0.03% | 8.46%  |
| FTC133-p17 | (P12109) Collagen alpha-1(VI) chain precursor                                            | CO6A1_HUMAN | 108531 | 100% | 2 | 3  | 4  | 0.03% | 3.31%  |
| FTC133-p17 | (P12109) Collagen alpha-1(VI) chain precursor                                            | CO6A1_HUMAN | 108531 | 100% | 3 | 3  | 3  | 0.03% | 7.20%  |
| FTC133-p17 | (P12277) Creatine kinase B-type (EC 2.7.3.2) (Creatine kinase, B chain) (B-CK)           | KCRB_HUMAN  | 42627  | 100% | 3 | 3  | 3  | 0.03% | 12.60% |
| FTC133-p17 | (P12277) Creatine kinase B-type (EC 2.7.3.2) (Creatine kinase, B chain) (B-CK)           | KCRB_HUMAN  | 42627  | 100% | 4 | 4  | 5  | 0.05% | 13.60% |
| FTC133-p17 | (P12277) Creatine kinase B-type (EC 2.7.3.2) (Creatine kinase, B chain) (B-CK)           | KCRB_HUMAN  | 42627  | 100% | 3 | 3  | 3  | 0.04% | 15.70% |
| FTC133-p17 | (P12277) Creatine kinase B-type (EC 2.7.3.2) (Creatine kinase, B chain) (B-CK)           | KCRB_HUMAN  | 42627  | 100% | 3 | 3  | 4  | 0.04% | 10.80% |
| FTC133-p17 | (P12277) Creatine kinase B-type (EC 2.7.3.2) (Creatine kinase, B chain) (B-CK)           | KCRB_HUMAN  | 42627  | 100% | 2 | 2  | 3  | 0.03% | 8.66%  |

## Protein Identified Sequence Coverage in FTC-133

|            |                                                                                                                                                                              |             |        |      |    |    |    |       |        |
|------------|------------------------------------------------------------------------------------------------------------------------------------------------------------------------------|-------------|--------|------|----|----|----|-------|--------|
| FTC133-p17 | (P12429) Annexin A3 (Annexin III) (Lipocortin III) (Placental anticoagulant protein III) (PAP-III) (35-alpha calcimedlin) (Inositol 1,2-cyclic phosphate 2-phosphohydrolase) | ANXA3_HUMAN | 36228  | 100% | 2  | 2  | 3  | 0.03% | 7.76%  |
| FTC133-p17 | (P12429) Annexin A3 (Annexin III) (Lipocortin III) (Placental anticoagulant protein III) (PAP-III) (35-alpha calcimedlin) (Inositol 1,2-cyclic phosphate 2-phosphohydrolase) | ANXA3_HUMAN | 36228  | 100% | 2  | 2  | 3  | 0.03% | 7.76%  |
| FTC133-p17 | (P12429) Annexin A3 (Annexin III) (Lipocortin III) (Placental anticoagulant protein III) (PAP-III) (35-alpha calcimedlin) (Inositol 1,2-cyclic phosphate 2-phosphohydrolase) | ANXA3_HUMAN | 36228  | 100% | 3  | 3  | 6  | 0.06% | 11.20% |
| FTC133-p17 | (P12429) Annexin A3 (Annexin III) (Lipocortin III) (Placental anticoagulant protein III) (PAP-III) (35-alpha calcimedlin) (Inositol 1,2-cyclic phosphate 2-phosphohydrolase) | ANXA3_HUMAN | 36228  | 100% | 4  | 4  | 7  | 0.08% | 16.10% |
| FTC133-p17 | (P12429) Annexin A3 (Annexin III) (Lipocortin III) (Placental anticoagulant protein III) (PAP-III) (35-alpha calcimedlin) (Inositol 1,2-cyclic phosphate 2-phosphohydrolase) | ANXA3_HUMAN | 36228  | 100% | 3  | 3  | 5  | 0.05% | 11.20% |
| FTC133-p17 | (P12814) Alpha-actinin-1 (Alpha-actinin cytoskeletal isoform) (Non-muscle alpha-actinin-1) (F-actin cross linking protein)                                                   | ACTN1_HUMAN | 103043 | 100% | 2  | 2  | 2  | 0.02% | 2.91%  |
| FTC133-p17 | (P12814) Alpha-actinin-1 (Alpha-actinin cytoskeletal isoform) (Non-muscle alpha-actinin-1) (F-actin cross linking protein)                                                   | ACTN1_HUMAN | 103043 | 100% | 2  | 2  | 2  | 0.02% | 2.91%  |
| FTC133-p17 | (P12814) Alpha-actinin-1 (Alpha-actinin cytoskeletal isoform) (Non-muscle alpha-actinin-1) (F-actin cross linking protein)                                                   | ACTN1_HUMAN | 103043 | 100% | 2  | 2  | 2  | 0.02% | 2.69%  |
| FTC133-p17 | (P12814) Alpha-actinin-1 (Alpha-actinin cytoskeletal isoform) (Non-muscle alpha-actinin-1) (F-actin cross linking protein)                                                   | ACTN1_HUMAN | 103043 | 100% | 2  | 2  | 2  | 0.02% | 3.03%  |
| FTC133-p17 | (P13284) Gamma-interferon-inducible lysosomal thiol reductase precursor (Gamma-interferon-inducible protein IP-30)                                                           | GILT_HUMAN  | 29131  | 100% | 2  | 2  | 2  | 0.02% | 21.10% |
| FTC133-p17 | (P13473) Lysosome-associated membrane glycoprotein 2 precursor (LAMP-2) (CD107b antigen)                                                                                     | LAMP2_HUMAN | 44943  | 100% | 2  | 2  | 3  | 0.03% | 4.88%  |
| FTC133-p17 | (P13473) Lysosome-associated membrane glycoprotein 2 precursor (LAMP-2) (CD107b antigen)                                                                                     | LAMP2_HUMAN | 44943  | 100% | 2  | 2  | 4  | 0.05% | 4.88%  |
| FTC133-p17 | (P13473) Lysosome-associated membrane glycoprotein 2 precursor (LAMP-2) (CD107b antigen)                                                                                     | LAMP2_HUMAN | 44943  | 100% | 2  | 2  | 3  | 0.03% | 4.88%  |
| FTC133-p17 | (P13667) Protein disulfide-isomerase A4 precursor (EC 5.3.4.1) (Protein ERp-72) (ERp72)                                                                                      | PDIA4_HUMAN | 72916  | 100% | 2  | 2  | 3  | 0.03% | 4.03%  |
| FTC133-p17 | (P13667) Protein disulfide-isomerase A4 precursor (EC 5.3.4.1) (Protein ERp-72) (ERp72)                                                                                      | PDIA4_HUMAN | 72916  | 100% | 11 | 11 | 19 | 0.18% | 20.60% |
| FTC133-p17 | (P13667) Protein disulfide-isomerase A4 precursor (EC 5.3.4.1) (Protein ERp-72) (ERp72)                                                                                      | PDIA4_HUMAN | 72916  | 100% | 12 | 12 | 18 | 0.17% | 23.10% |
| FTC133-p17 | (P13667) Protein disulfide-isomerase A4 precursor (EC 5.3.4.1) (Protein ERp-72) (ERp72)                                                                                      | PDIA4_HUMAN | 72916  | 100% | 10 | 10 | 13 | 0.16% | 17.70% |
| FTC133-p17 | (P13667) Protein disulfide-isomerase A4 precursor (EC 5.3.4.1) (Protein ERp-72) (ERp72)                                                                                      | PDIA4_HUMAN | 72916  | 100% | 3  | 3  | 5  | 0.08% | 5.43%  |
| FTC133-p17 | (P13667) Protein disulfide-isomerase A4 precursor (EC 5.3.4.1) (Protein ERp-72) (ERp72)                                                                                      | PDIA4_HUMAN | 72916  | 100% | 3  | 3  | 6  | 0.09% | 8.84%  |

## Protein Identified Sequence Coverage in FTC-133

|            |                                                                                                                                                                                                                                                      |             |       |      |    |    |    |       |        |
|------------|------------------------------------------------------------------------------------------------------------------------------------------------------------------------------------------------------------------------------------------------------|-------------|-------|------|----|----|----|-------|--------|
| FTC133-p17 | (P13667) Protein disulfide-isomerase A4 precursor (EC 5.3.4.1) (Protein ERp-72) (ERp72)                                                                                                                                                              | PDIA4_HUMAN | 72916 | 100% | 10 | 10 | 18 | 0.17% | 16.00% |
| FTC133-p17 | (P13667) Protein disulfide-isomerase A4 precursor (EC 5.3.4.1) (Protein ERp-72) (ERp72)                                                                                                                                                              | PDIA4_HUMAN | 72916 | 100% | 3  | 3  | 4  | 0.04% | 8.84%  |
| FTC133-p17 | (P13667) Protein disulfide-isomerase A4 precursor (EC 5.3.4.1) (Protein ERp-72) (ERp72)                                                                                                                                                              | PDIA4_HUMAN | 72916 | 100% | 3  | 4  | 4  | 0.03% | 8.22%  |
| FTC133-p17 | (P13987) CD59 glycoprotein precursor (Membrane attack complex inhibition factor) (MACIF) (MAC-inhibitory protein) (MAC-IP) (Protectin) (MEM43 antigen) (Membrane inhibitor of reactive lysis) (MIRL) (20 kDa homologous restriction factor) (HRF-20) | CD59_HUMAN  | 14159 | 100% | 3  | 3  | 5  | 0.05% | 23.40% |
| FTC133-p17 | (P13987) CD59 glycoprotein precursor (Membrane attack complex inhibition factor) (MACIF) (MAC-inhibitory protein) (MAC-IP) (Protectin) (MEM43 antigen) (Membrane inhibitor of reactive lysis) (MIRL) (20 kDa homologous restriction factor) (HRF-20) | CD59_HUMAN  | 14159 | 100% | 3  | 3  | 7  | 0.06% | 25.00% |
| FTC133-p17 | (P13987) CD59 glycoprotein precursor (Membrane attack complex inhibition factor) (MACIF) (MAC-inhibitory protein) (MAC-IP) (Protectin) (MEM43 antigen) (Membrane inhibitor of reactive lysis) (MIRL) (20 kDa homologous restriction factor) (HRF-20) | CD59_HUMAN  | 14159 | 100% | 2  | 2  | 3  | 0.05% | 18.80% |
| FTC133-p17 | (P13987) CD59 glycoprotein precursor (Membrane attack complex inhibition factor) (MACIF) (MAC-inhibitory protein) (MAC-IP) (Protectin) (MEM43 antigen) (Membrane inhibitor of reactive lysis) (MIRL) (20 kDa homologous restriction factor) (HRF-20) | CD59_HUMAN  | 14159 | 100% | 2  | 3  | 6  | 0.06% | 18.80% |
| FTC133-p17 | (P14314) Glucosidase 2 beta subunit precursor (Glucosidase II beta subunit) (Protein kinase C substrate, 60.1 kDa protein, heavy chain) (PKCSH) (80K-H protein)                                                                                      | GLU2B_HUMAN | 59279 | 100% | 3  | 3  | 6  | 0.06% | 6.45%  |
| FTC133-p17 | (P14314) Glucosidase 2 beta subunit precursor (Glucosidase II beta subunit) (Protein kinase C substrate, 60.1 kDa protein, heavy chain) (PKCSH) (80K-H protein)                                                                                      | GLU2B_HUMAN | 59279 | 100% | 5  | 5  | 8  | 0.07% | 10.80% |
| FTC133-p17 | (P14314) Glucosidase 2 beta subunit precursor (Glucosidase II beta subunit) (Protein kinase C substrate, 60.1 kDa protein, heavy chain) (PKCSH) (80K-H protein)                                                                                      | GLU2B_HUMAN | 59279 | 100% | 2  | 2  | 2  | 0.02% | 3.80%  |
| FTC133-p17 | (P14314) Glucosidase 2 beta subunit precursor (Glucosidase II beta subunit) (Protein kinase C substrate, 60.1 kDa protein, heavy chain) (PKCSH) (80K-H protein)                                                                                      | GLU2B_HUMAN | 59279 | 100% | 2  | 2  | 2  | 0.03% | 4.55%  |
| FTC133-p17 | (P14314) Glucosidase 2 beta subunit precursor (Glucosidase II beta subunit) (Protein kinase C substrate, 60.1 kDa protein, heavy chain) (PKCSH) (80K-H protein)                                                                                      | GLU2B_HUMAN | 59279 | 100% | 4  | 4  | 5  | 0.05% | 10.20% |
| FTC133-p17 | (P14618) Pyruvate kinase isozymes M1/M2 (EC 2.7.1.40) (Pyruvate kinase muscle isozyme) (Cytosolic thyroid hormone-binding protein) (CTHBP) (THBP1)                                                                                                   | KPYM_HUMAN  | 57788 | 100% | 2  | 2  | 2  | 0.02% | 5.09%  |

## Protein Identified Sequence Coverage in FTC-133

|            |                                                                                                                                                                                                              |                 |       |      |   |   |   |       |        |
|------------|--------------------------------------------------------------------------------------------------------------------------------------------------------------------------------------------------------------|-----------------|-------|------|---|---|---|-------|--------|
| FTC133-p17 | (P14618) Pyruvate kinase isozymes M1/M2 (EC 2.7.1.40) (Pyruvate kinase muscle isozyme) (Cytosolic thyroid hormone-binding protein) (CTHBP) (THBP1)                                                           | KPYM_HUMAN      | 57788 | 100% | 2 | 2 | 2 | 0.02% | 6.23%  |
| FTC133-p17 | (P14618) Pyruvate kinase isozymes M1/M2 (EC 2.7.1.40) (Pyruvate kinase muscle isozyme) (Cytosolic thyroid hormone-binding protein) (CTHBP) (THBP1)                                                           | KPYM_HUMAN      | 57788 | 100% | 2 | 2 | 2 | 0.02% | 5.28%  |
| FTC133-p17 | (P14618) Pyruvate kinase isozymes M1/M2 (EC 2.7.1.40) (Pyruvate kinase muscle isozyme) (Cytosolic thyroid hormone-binding protein) (CTHBP) (THBP1)                                                           | KPYM_HUMAN      | 57788 | 100% | 2 | 2 | 2 | 0.02% | 6.23%  |
| FTC133-p17 | (P14625) Endoplasmin precursor (Heat shock protein 90 kDa beta member 1) (94 kDa glucose-regulated protein) (GRP94) (gp96 homolog) (Tumor rejection antigen 1)                                               | ENPL_HUMAN      | 92454 | 100% | 4 | 4 | 7 | 0.07% | 6.10%  |
| FTC133-p17 | (P14625) Endoplasmin precursor (Heat shock protein 90 kDa beta member 1) (94 kDa glucose-regulated protein) (GRP94) (gp96 homolog) (Tumor rejection antigen 1)                                               | ENPL_HUMAN      | 92454 | 100% | 3 | 4 | 6 | 0.06% | 4.36%  |
| FTC133-p17 | (P14625) Endoplasmin precursor (Heat shock protein 90 kDa beta member 1) (94 kDa glucose-regulated protein) (GRP94) (gp96 homolog) (Tumor rejection antigen 1)                                               | ENPL_HUMAN      | 92454 | 100% | 3 | 3 | 3 | 0.03% | 4.36%  |
| FTC133-p17 | (P14625) Endoplasmin precursor (Heat shock protein 90 kDa beta member 1) (94 kDa glucose-regulated protein) (GRP94) (gp96 homolog) (Tumor rejection antigen 1)                                               | ENPL_HUMAN      | 92454 | 100% | 2 | 2 | 2 | 0.02% | 5.35%  |
| FTC133-p17 | (P14678) Small nuclear ribonucleoprotein-associated proteins B and B' (snRNP-B) (Sm protein B/B') (Sm-B/Sm-B') (SmB/SmB')                                                                                    | RSMB_HUMAN,RSMB | 24596 | 100% | 2 | 2 | 4 | 0.04% | 9.58%  |
| FTC133-p17 | (P15289) Arylsulfatase A precursor (EC 3.1.6.8) (ASA) (Cerebroside-sulfatase) [Contains: Arylsulfatase A component B; Arylsulfatase A component C]                                                           | ARSA_HUMAN      | 53571 | 100% | 5 | 5 | 7 | 0.06% | 16.60% |
| FTC133-p17 | (P15289) Arylsulfatase A precursor (EC 3.1.6.8) (ASA) (Cerebroside-sulfatase) [Contains: Arylsulfatase A component B; Arylsulfatase A component C]                                                           | ARSA_HUMAN      | 53571 | 100% | 3 | 3 | 3 | 0.04% | 9.07%  |
| FTC133-p17 | (P15289) Arylsulfatase A precursor (EC 3.1.6.8) (ASA) (Cerebroside-sulfatase) [Contains: Arylsulfatase A component B; Arylsulfatase A component C]                                                           | ARSA_HUMAN      | 53571 | 100% | 2 | 2 | 4 | 0.04% | 6.51%  |
| FTC133-p17 | (P15289) Arylsulfatase A precursor (EC 3.1.6.8) (ASA) (Cerebroside-sulfatase) [Contains: Arylsulfatase A component B; Arylsulfatase A component C]                                                           | ARSA_HUMAN      | 53571 | 100% | 2 | 2 | 3 | 0.03% | 6.11%  |
| FTC133-p17 | (P15311) Ezrin (p81) (Cytovillin) (Villin-2)                                                                                                                                                                 | EZRI_HUMAN      | 69251 | 100% | 4 | 4 | 4 | 0.04% | 11.80% |
| FTC133-p17 | (P15311) Ezrin (p81) (Cytovillin) (Villin-2)                                                                                                                                                                 | EZRI_HUMAN      | 69251 | 100% | 2 | 2 | 3 | 0.03% | 8.72%  |
| FTC133-p17 | (P15311) Ezrin (p81) (Cytovillin) (Villin-2)                                                                                                                                                                 | EZRI_HUMAN      | 69251 | 100% | 2 | 2 | 2 | 0.02% | 8.72%  |
| FTC133-p17 | (P15311) Ezrin (p81) (Cytovillin) (Villin-2)                                                                                                                                                                 | EZRI_HUMAN      | 69251 | 100% | 2 | 2 | 3 | 0.05% | 4.44%  |
| FTC133-p17 | (P15311) Ezrin (p81) (Cytovillin) (Villin-2)                                                                                                                                                                 | EZRI_HUMAN      | 69251 | 100% | 4 | 5 | 6 | 0.06% | 14.20% |
| FTC133-p17 | (P15531) Nucleoside diphosphate kinase A (EC 2.7.4.6) (NDK A) (NDP kinase A) (Tumor metastatic process-associated protein) (Metastasis inhibition factor nm23) (nm23-H1) (Granzyme A-activated DNase) (GAAD) | NDKA_HUMAN      | 17131 | 100% | 2 | 2 | 3 | 0.03% | 32.20% |

Protein Identified Sequence Coverage in FTC-133

|            |                                                                                                                                                                                                                                                     |            |       |      |   |   |    |       |        |
|------------|-----------------------------------------------------------------------------------------------------------------------------------------------------------------------------------------------------------------------------------------------------|------------|-------|------|---|---|----|-------|--------|
| FTC133-p17 | (P15531) Nucleoside diphosphate kinase A (EC 2.7.4.6) (NDK A) (NDP kinase A) (Tumor metastatic process-associated protein) (Metastasis inhibition factor nm23) (nm23-H1) (Granzyme A-activated DNase) (GAAD)                                        | NDKA_HUMAN | 17131 | 100% | 2 | 2 | 2  | 0.02% | 40.10% |
| FTC133-p17 | (P15586) N-acetylglucosamine-6-sulfatase precursor (EC 3.1.6.14) (G6S) (Glucosamine-6-sulfatase)                                                                                                                                                    | GL6S_HUMAN | 62066 | 100% | 3 | 4 | 11 | 0.11% | 6.34%  |
| FTC133-p17 | (P15586) N-acetylglucosamine-6-sulfatase precursor (EC 3.1.6.14) (G6S) (Glucosamine-6-sulfatase)                                                                                                                                                    | GL6S_HUMAN | 62066 | 100% | 5 | 5 | 7  | 0.07% | 12.00% |
| FTC133-p17 | (P15586) N-acetylglucosamine-6-sulfatase precursor (EC 3.1.6.14) (G6S) (Glucosamine-6-sulfatase)                                                                                                                                                    | GL6S_HUMAN | 62066 | 100% | 5 | 6 | 8  | 0.08% | 11.80% |
| FTC133-p17 | (P15586) N-acetylglucosamine-6-sulfatase precursor (EC 3.1.6.14) (G6S) (Glucosamine-6-sulfatase)                                                                                                                                                    | GL6S_HUMAN | 62066 | 100% | 4 | 5 | 16 | 0.15% | 10.50% |
| FTC133-p17 | (P15586) N-acetylglucosamine-6-sulfatase precursor (EC 3.1.6.14) (G6S) (Glucosamine-6-sulfatase)                                                                                                                                                    | GL6S_HUMAN | 62066 | 100% | 5 | 5 | 6  | 0.06% | 13.00% |
| FTC133-p17 | (P15586) N-acetylglucosamine-6-sulfatase precursor (EC 3.1.6.14) (G6S) (Glucosamine-6-sulfatase)                                                                                                                                                    | GL6S_HUMAN | 62066 | 100% | 3 | 3 | 7  | 0.07% | 10.50% |
| FTC133-p17 | (P15586) N-acetylglucosamine-6-sulfatase precursor (EC 3.1.6.14) (G6S) (Glucosamine-6-sulfatase)                                                                                                                                                    | GL6S_HUMAN | 62066 | 100% | 8 | 8 | 15 | 0.14% | 16.80% |
| FTC133-p17 | (P15586) N-acetylglucosamine-6-sulfatase precursor (EC 3.1.6.14) (G6S) (Glucosamine-6-sulfatase)                                                                                                                                                    | GL6S_HUMAN | 62066 | 100% | 5 | 5 | 12 | 0.14% | 13.40% |
| FTC133-p17 | (P15586) N-acetylglucosamine-6-sulfatase precursor (EC 3.1.6.14) (G6S) (Glucosamine-6-sulfatase)                                                                                                                                                    | GL6S_HUMAN | 62066 | 100% | 3 | 3 | 4  | 0.07% | 6.16%  |
| FTC133-p17 | (P15586) N-acetylglucosamine-6-sulfatase precursor (EC 3.1.6.14) (G6S) (Glucosamine-6-sulfatase)                                                                                                                                                    | GL6S_HUMAN | 62066 | 100% | 6 | 6 | 12 | 0.11% | 12.90% |
| FTC133-p17 | (P15586) N-acetylglucosamine-6-sulfatase precursor (EC 3.1.6.14) (G6S) (Glucosamine-6-sulfatase)                                                                                                                                                    | GL6S_HUMAN | 62066 | 100% | 2 | 2 | 3  | 0.03% | 14.30% |
| FTC133-p17 | (P16070) CD44 antigen precursor (Phagocytic glycoprotein I) (PGP-1) (HUTCH-I) (Extracellular matrix receptor-III) (ECMR-III) (GP90 lymphocyte homing/adhesion receptor) (Hermes antigen) (Hyaluronate receptor) (Heparan sulfate proteoglycan) (Epi | CD44_HUMAN | 81535 | 100% | 2 | 4 | 5  | 0.05% | 3.50%  |
| FTC133-p17 | (P16070) CD44 antigen precursor (Phagocytic glycoprotein I) (PGP-1) (HUTCH-I) (Extracellular matrix receptor-III) (ECMR-III) (GP90 lymphocyte homing/adhesion receptor) (Hermes antigen) (Hyaluronate receptor) (Heparan sulfate proteoglycan) (Epi | CD44_HUMAN | 81535 | 100% | 3 | 4 | 7  | 0.07% | 4.18%  |
| FTC133-p17 | (P16070) CD44 antigen precursor (Phagocytic glycoprotein I) (PGP-1) (HUTCH-I) (Extracellular matrix receptor-III) (ECMR-III) (GP90 lymphocyte homing/adhesion receptor) (Hermes antigen) (Hyaluronate receptor) (Heparan sulfate proteoglycan) (Epi | CD44_HUMAN | 81535 | 100% | 3 | 4 | 8  | 0.07% | 4.18%  |

## Protein Identified Sequence Coverage in FTC-133

|            |                                                                                                                                                                                                                                                     |             |       |      |   |   |    |       |        |
|------------|-----------------------------------------------------------------------------------------------------------------------------------------------------------------------------------------------------------------------------------------------------|-------------|-------|------|---|---|----|-------|--------|
| FTC133-p17 | (P16070) CD44 antigen precursor (Phagocytic glycoprotein I) (PGP-1) (HUTCH-I) (Extracellular matrix receptor-III) (ECMR-III) (GP90 lymphocyte homing/adhesion receptor) (Hermes antigen) (Hyaluronate receptor) (Heparan sulfate proteoglycan) (Epi | CD44_HUMAN  | 81535 | 100% | 2 | 3 | 5  | 0.06% | 2.96%  |
| FTC133-p17 | (P16070) CD44 antigen precursor (Phagocytic glycoprotein I) (PGP-1) (HUTCH-I) (Extracellular matrix receptor-III) (ECMR-III) (GP90 lymphocyte homing/adhesion receptor) (Hermes antigen) (Hyaluronate receptor) (Heparan sulfate proteoglycan) (Epi | CD44_HUMAN  | 81535 | 100% | 3 | 4 | 8  | 0.08% | 4.18%  |
| FTC133-p17 | (P16278) Beta-galactosidase precursor (EC 3.2.1.23) (Lactase) (Acid beta-galactosidase)                                                                                                                                                             | BGAL_HUMAN  | 76076 | 100% | 2 | 2 | 2  | 0.02% | 4.28%  |
| FTC133-p17 | (P16278) Beta-galactosidase precursor (EC 3.2.1.23) (Lactase) (Acid beta-galactosidase)                                                                                                                                                             | BGAL_HUMAN  | 76076 | 100% | 8 | 8 | 12 | 0.11% | 14.30% |
| FTC133-p17 | (P16278) Beta-galactosidase precursor (EC 3.2.1.23) (Lactase) (Acid beta-galactosidase)                                                                                                                                                             | BGAL_HUMAN  | 76076 | 100% | 8 | 8 | 13 | 0.12% | 14.80% |
| FTC133-p17 | (P16278) Beta-galactosidase precursor (EC 3.2.1.23) (Lactase) (Acid beta-galactosidase)                                                                                                                                                             | BGAL_HUMAN  | 76076 | 100% | 5 | 5 | 7  | 0.08% | 10.30% |
| FTC133-p17 | (P16278) Beta-galactosidase precursor (EC 3.2.1.23) (Lactase) (Acid beta-galactosidase)                                                                                                                                                             | BGAL_HUMAN  | 76076 | 100% | 9 | 9 | 12 | 0.11% | 16.80% |
| FTC133-p17 | (P16278) Beta-galactosidase precursor (EC 3.2.1.23) (Lactase) (Acid beta-galactosidase)                                                                                                                                                             | BGAL_HUMAN  | 76076 | 100% | 3 | 3 | 5  | 0.04% | 6.06%  |
| FTC133-p17 | (P17050) Alpha-N-acetylgalactosaminidase precursor (EC 3.2.1.49) (Alpha-galactosidase B)                                                                                                                                                            | NAGAB_HUMAN | 46548 | 100% | 3 | 3 | 3  | 0.03% | 9.73%  |
| FTC133-p17 | (P17050) Alpha-N-acetylgalactosaminidase precursor (EC 3.2.1.49) (Alpha-galactosidase B)                                                                                                                                                            | NAGAB_HUMAN | 46548 | 100% | 2 | 2 | 2  | 0.02% | 5.60%  |
| FTC133-p17 | (P17174) Aspartate aminotransferase, cytoplasmic (EC 2.6.1.1) (Transaminase A) (Glutamate oxaloacetate transaminase 1)                                                                                                                              | AATC_HUMAN  | 46099 | 100% | 2 | 2 | 2  | 0.02% | 5.58%  |
| FTC133-p17 | (P17174) Aspartate aminotransferase, cytoplasmic (EC 2.6.1.1) (Transaminase A) (Glutamate oxaloacetate transaminase 1)                                                                                                                              | AATC_HUMAN  | 46099 | 100% | 5 | 5 | 8  | 0.08% | 19.40% |
| FTC133-p17 | (P17174) Aspartate aminotransferase, cytoplasmic (EC 2.6.1.1) (Transaminase A) (Glutamate oxaloacetate transaminase 1)                                                                                                                              | AATC_HUMAN  | 46099 | 100% | 4 | 4 | 5  | 0.05% | 16.50% |
| FTC133-p17 | (P17174) Aspartate aminotransferase, cytoplasmic (EC 2.6.1.1) (Transaminase A) (Glutamate oxaloacetate transaminase 1)                                                                                                                              | AATC_HUMAN  | 46099 | 100% | 4 | 4 | 5  | 0.06% | 18.20% |
| FTC133-p17 | (P17174) Aspartate aminotransferase, cytoplasmic (EC 2.6.1.1) (Transaminase A) (Glutamate oxaloacetate transaminase 1)                                                                                                                              | AATC_HUMAN  | 46099 | 100% | 2 | 2 | 2  | 0.03% | 9.47%  |
| FTC133-p17 | (P17174) Aspartate aminotransferase, cytoplasmic (EC 2.6.1.1) (Transaminase A) (Glutamate oxaloacetate transaminase 1)                                                                                                                              | AATC_HUMAN  | 46099 | 100% | 7 | 8 | 9  | 0.08% | 26.50% |
| FTC133-p17 | (P17174) Aspartate aminotransferase, cytoplasmic (EC 2.6.1.1) (Transaminase A) (Glutamate oxaloacetate transaminase 1)                                                                                                                              | AATC_HUMAN  | 46099 | 100% | 3 | 4 | 5  | 0.04% | 12.90% |
| FTC133-p17 | (P17174) Aspartate aminotransferase, cytoplasmic (EC 2.6.1.1) (Transaminase A) (Glutamate oxaloacetate transaminase 1)                                                                                                                              | AATC_HUMAN  | 46099 | 99%  | 2 | 2 | 2  | 0.02% | 10.70% |
| FTC133-p17 | (P17900) Ganglioside GM2 activator precursor (GM2-AP) (Cerebroside sulfate activator protein) (Shingolipid activator protein 3) (SAP-3) [Contains: Ganglioside GM2 activator isoform short]                                                         | SAP3_HUMAN  | 20805 | 100% | 2 | 2 | 2  | 0.02% | 15.50% |

## Protein Identified Sequence Coverage in FTC-133

|            |                                                                                                                                                                                                                                                   |             |        |      |    |    |    |       |        |
|------------|---------------------------------------------------------------------------------------------------------------------------------------------------------------------------------------------------------------------------------------------------|-------------|--------|------|----|----|----|-------|--------|
| FTC133-p17 | (P17900) Ganglioside GM2 activator precursor (GM2-AP) (Cerebroside sulfate activator protein) (Shingolipid activator protein 3) (SAP-3) [Contains: Ganglioside GM2 activator isoform short]                                                       | SAP3_HUMAN  | 20805  | 100% | 2  | 2  | 2  | 0.02% | 9.33%  |
| FTC133-p17 | (P18583) SON protein (SON3) (Negative regulatory element-binding protein) (NRE-binding protein) (DBP-5) (Bax antagonist selected in saccharomyces 1) (BASS1)                                                                                      | SON_HUMAN   | 263828 | 100% | 2  | 2  | 2  | 0.02% | 1.20%  |
| FTC133-p17 | (P18583) SON protein (SON3) (Negative regulatory element-binding protein) (NRE-binding protein) (DBP-5) (Bax antagonist selected in saccharomyces 1) (BASS1)                                                                                      | SON_HUMAN   | 263828 | 100% | 2  | 2  | 2  | 0.02% | 1.20%  |
| FTC133-p17 | (P19105) Myosin regulatory light chain 2, nonsarcomeric (Myosin RLC)                                                                                                                                                                              | MLRM_HUMAN  | 19646  | 100% | 2  | 2  | 3  | 0.05% | 22.40% |
| FTC133-p17 | (P19105) Myosin regulatory light chain 2, nonsarcomeric (Myosin RLC)                                                                                                                                                                              | MLRM_HUMAN  | 19646  | 100% | 2  | 2  | 2  | 0.02% | 17.10% |
| FTC133-p17 | (P20618) Proteasome subunit beta type 1 (EC 3.4.25.1) (Proteasome component C5) (Macropain subunit C5) (Multicatalytic endopeptidase complex subunit C5) (Proteasome gamma chain)                                                                 | PSB1_HUMAN  | 26473  | 100% | 5  | 5  | 7  | 0.07% | 31.10% |
| FTC133-p17 | (P20618) Proteasome subunit beta type 1 (EC 3.4.25.1) (Proteasome component C5) (Macropain subunit C5) (Multicatalytic endopeptidase complex subunit C5) (Proteasome gamma chain)                                                                 | PSB1_HUMAN  | 26473  | 100% | 10 | 12 | 18 | 0.17% | 58.10% |
| FTC133-p17 | (P20618) Proteasome subunit beta type 1 (EC 3.4.25.1) (Proteasome component C5) (Macropain subunit C5) (Multicatalytic endopeptidase complex subunit C5) (Proteasome gamma chain)                                                                 | PSB1_HUMAN  | 26473  | 100% | 9  | 10 | 18 | 0.17% | 50.60% |
| FTC133-p17 | (P20618) Proteasome subunit beta type 1 (EC 3.4.25.1) (Proteasome component C5) (Macropain subunit C5) (Multicatalytic endopeptidase complex subunit C5) (Proteasome gamma chain)                                                                 | PSB1_HUMAN  | 26473  | 100% | 4  | 5  | 8  | 0.10% | 28.60% |
| FTC133-p17 | (P20618) Proteasome subunit beta type 1 (EC 3.4.25.1) (Proteasome component C5) (Macropain subunit C5) (Multicatalytic endopeptidase complex subunit C5) (Proteasome gamma chain)                                                                 | PSB1_HUMAN  | 26473  | 100% | 3  | 3  | 5  | 0.08% | 12.40% |
| FTC133-p17 | (P20618) Proteasome subunit beta type 1 (EC 3.4.25.1) (Proteasome component C5) (Macropain subunit C5) (Multicatalytic endopeptidase complex subunit C5) (Proteasome gamma chain)                                                                 | PSB1_HUMAN  | 26473  | 100% | 7  | 8  | 21 | 0.20% | 39.80% |
| FTC133-p17 | (P20700) Lamin-B1                                                                                                                                                                                                                                 | LMNB1_HUMAN | 66260  | 100% | 2  | 2  | 4  | 0.04% | 5.64%  |
| FTC133-p17 | (P20933) N(4)-(beta-N-acetylglucosaminy)-L-asparaginase precursor (EC 3.5.1.26) (Glycosylasparaginase) (Aspartylglucosaminidase) (N4-(N-acetyl-beta-glucosaminy)-L-asparagine amidase) (AGA) [Contains: Glycosylasparaginase alpha chain; Glycosy | ASPG_HUMAN  | 37176  | 100% | 2  | 2  | 2  | 0.02% | 12.40% |

## Protein Identified Sequence Coverage in FTC-133

|            |                                                                                                                                                                              |             |        |      |   |   |    |       |        |
|------------|------------------------------------------------------------------------------------------------------------------------------------------------------------------------------|-------------|--------|------|---|---|----|-------|--------|
| FTC133-p17 | (P21333) Filamin-A (Alpha-filamin) (Filamin-1) (Endothelial actin-binding protein) (Actin-binding protein 280) (ABP-280) (Nonmuscle filamin)                                 | FLNA_HUMAN  | 280602 | 100% | 4 | 4 | 5  | 0.05% | 2.12%  |
| FTC133-p17 | (P21333) Filamin-A (Alpha-filamin) (Filamin-1) (Endothelial actin-binding protein) (Actin-binding protein 280) (ABP-280) (Nonmuscle filamin)                                 | FLNA_HUMAN  | 280602 | 100% | 2 | 2 | 2  | 0.02% | 0.91%  |
| FTC133-p17 | (P21333) Filamin-A (Alpha-filamin) (Filamin-1) (Endothelial actin-binding protein) (Actin-binding protein 280) (ABP-280) (Nonmuscle filamin)                                 | FLNA_HUMAN  | 280602 | 100% | 2 | 2 | 3  | 0.04% | 0.91%  |
| FTC133-p17 | (P21333) Filamin-A (Alpha-filamin) (Filamin-1) (Endothelial actin-binding protein) (Actin-binding protein 280) (ABP-280) (Nonmuscle filamin)                                 | FLNA_HUMAN  | 280602 | 100% | 2 | 2 | 2  | 0.02% | 0.91%  |
| FTC133-p17 | (P21589) 5'-nucleotidase precursor (EC 3.1.3.5) (Ecto-5'-nucleotidase) (5'-NT) (CD73 antigen)                                                                                | 5NTD_HUMAN  | 63351  | 100% | 2 | 2 | 2  | 0.02% | 8.01%  |
| FTC133-p17 | (P21796) Voltage-dependent anion-selective channel protein 1 (VDAC-1) (hVDAC1) (Outer mitochondrial membrane protein porin 1) (Plasmalemmal porin) (Porin 31HL) (Porin 31HM) | VDAC1_HUMAN | 30625  | 100% | 2 | 2 | 2  | 0.02% | 8.51%  |
| FTC133-p17 | (P21796) Voltage-dependent anion-selective channel protein 1 (VDAC-1) (hVDAC1) (Outer mitochondrial membrane protein porin 1) (Plasmalemmal porin) (Porin 31HL) (Porin 31HM) | VDAC1_HUMAN | 30625  | 100% | 2 | 2 | 3  | 0.03% | 8.51%  |
| FTC133-p17 | (P22392) Nucleoside diphosphate kinase B (EC 2.7.4.6) (NDK B) (NDP kinase B) (nm23-H2) (C-myc purine-binding transcription factor PUF)                                       | NDKB_HUMAN  | 17280  | 100% | 2 | 3 | 3  | 0.03% | 19.10% |
| FTC133-p17 | (P22392) Nucleoside diphosphate kinase B (EC 2.7.4.6) (NDK B) (NDP kinase B) (nm23-H2) (C-myc purine-binding transcription factor PUF)                                       | NDKB_HUMAN  | 17280  | 100% | 6 | 7 | 15 | 0.14% | 54.60% |
| FTC133-p17 | (P22392) Nucleoside diphosphate kinase B (EC 2.7.4.6) (NDK B) (NDP kinase B) (nm23-H2) (C-myc purine-binding transcription factor PUF)                                       | NDKB_HUMAN  | 17280  | 100% | 5 | 7 | 16 | 0.15% | 46.70% |
| FTC133-p17 | (P22392) Nucleoside diphosphate kinase B (EC 2.7.4.6) (NDK B) (NDP kinase B) (nm23-H2) (C-myc purine-binding transcription factor PUF)                                       | NDKB_HUMAN  | 17280  | 100% | 5 | 5 | 9  | 0.11% | 42.10% |
| FTC133-p17 | (P22392) Nucleoside diphosphate kinase B (EC 2.7.4.6) (NDK B) (NDP kinase B) (nm23-H2) (C-myc purine-binding transcription factor PUF)                                       | NDKB_HUMAN  | 17280  | 100% | 2 | 3 | 4  | 0.07% | 17.80% |
| FTC133-p17 | (P22392) Nucleoside diphosphate kinase B (EC 2.7.4.6) (NDK B) (NDP kinase B) (nm23-H2) (C-myc purine-binding transcription factor PUF)                                       | NDKB_HUMAN  | 17280  | 100% | 5 | 6 | 14 | 0.13% | 46.70% |
| FTC133-p17 | (P23284) Peptidyl-prolyl cis-trans isomerase B precursor (EC 5.2.1.8) (PPIase) (Rotamase) (Cyclophilin B) (S-cyclophilin) (SCYLP) (CYP-S1)                                   | PPIB_HUMAN  | 22725  | 100% | 3 | 3 | 5  | 0.05% | 16.80% |
| FTC133-p17 | (P23284) Peptidyl-prolyl cis-trans isomerase B precursor (EC 5.2.1.8) (PPIase) (Rotamase) (Cyclophilin B) (S-cyclophilin) (SCYLP) (CYP-S1)                                   | PPIB_HUMAN  | 22725  | 100% | 3 | 3 | 3  | 0.03% | 16.80% |
| FTC133-p17 | (P23284) Peptidyl-prolyl cis-trans isomerase B precursor (EC 5.2.1.8) (PPIase) (Rotamase) (Cyclophilin B) (S-cyclophilin) (SCYLP) (CYP-S1)                                   | PPIB_HUMAN  | 22725  | 100% | 2 | 2 | 3  | 0.04% | 11.50% |
| FTC133-p17 | (P23284) Peptidyl-prolyl cis-trans isomerase B precursor (EC 5.2.1.8) (PPIase) (Rotamase) (Cyclophilin B) (S-cyclophilin) (SCYLP) (CYP-S1)                                   | PPIB_HUMAN  | 22725  | 100% | 3 | 3 | 3  | 0.03% | 16.80% |
| FTC133-p17 | (P23528) Cofilin-1 (Cofilin, non-muscle isoform) (18 kDa phosphoprotein) (p18)                                                                                               | COF1_HUMAN  | 18354  | 100% | 4 | 4 | 7  | 0.07% | 32.10% |
| FTC133-p17 | (P23528) Cofilin-1 (Cofilin, non-muscle isoform) (18 kDa phosphoprotein) (p18)                                                                                               | COF1_HUMAN  | 18354  | 100% | 3 | 3 | 5  | 0.05% | 27.30% |



## Protein Identified Sequence Coverage in FTC-133

|            |                                                                                                                                                           |             |       |      |    |    |    |       |        |
|------------|-----------------------------------------------------------------------------------------------------------------------------------------------------------|-------------|-------|------|----|----|----|-------|--------|
| FTC133-p17 | (P23528) Cofilin-1 (Cofilin, non-muscle isoform) (18 kDa phosphoprotein) (p18)                                                                            | COF1_HUMAN  | 18354 | 100% | 3  | 3  | 4  | 0.05% | 30.90% |
| FTC133-p17 | (P23528) Cofilin-1 (Cofilin, non-muscle isoform) (18 kDa phosphoprotein) (p18)                                                                            | COF1_HUMAN  | 18354 | 100% | 4  | 4  | 5  | 0.05% | 37.60% |
| FTC133-p17 | (P25788) Proteasome subunit alpha type 3 (EC 3.4.25.1) (Proteasome component C8) (Macropain subunit C8) (Multicatalytic endopeptidase complex subunit C8) | PSA3_HUMAN  | 28285 | 100% | 2  | 2  | 4  | 0.04% | 10.20% |
| FTC133-p17 | (P25788) Proteasome subunit alpha type 3 (EC 3.4.25.1) (Proteasome component C8) (Macropain subunit C8) (Multicatalytic endopeptidase complex subunit C8) | PSA3_HUMAN  | 28285 | 100% | 3  | 3  | 4  | 0.04% | 14.20% |
| FTC133-p17 | (P25788) Proteasome subunit alpha type 3 (EC 3.4.25.1) (Proteasome component C8) (Macropain subunit C8) (Multicatalytic endopeptidase complex subunit C8) | PSA3_HUMAN  | 28285 | 100% | 3  | 4  | 5  | 0.05% | 13.00% |
| FTC133-p17 | (P26038) Moesin (Membrane-organizing extension spike protein)                                                                                             | MOES_HUMAN  | 67673 | 100% | 5  | 6  | 10 | 0.10% | 10.40% |
| FTC133-p17 | (P26038) Moesin (Membrane-organizing extension spike protein)                                                                                             | MOES_HUMAN  | 67673 | 100% | 9  | 11 | 18 | 0.17% | 16.50% |
| FTC133-p17 | (P26038) Moesin (Membrane-organizing extension spike protein)                                                                                             | MOES_HUMAN  | 67673 | 100% | 11 | 13 | 14 | 0.13% | 21.70% |
| FTC133-p17 | (P26038) Moesin (Membrane-organizing extension spike protein)                                                                                             | MOES_HUMAN  | 67673 | 100% | 7  | 9  | 12 | 0.14% | 14.20% |
| FTC133-p17 | (P26038) Moesin (Membrane-organizing extension spike protein)                                                                                             | MOES_HUMAN  | 67673 | 100% | 11 | 11 | 15 | 0.14% | 21.00% |
| FTC133-p17 | (P26038) Moesin (Membrane-organizing extension spike protein)                                                                                             | MOES_HUMAN  | 67673 | 100% | 2  | 2  | 2  | 0.02% | 6.25%  |
| FTC133-p17 | (P26038) Moesin (Membrane-organizing extension spike protein)                                                                                             | MOES_HUMAN  | 67673 | 100% | 2  | 2  | 3  | 0.03% | 5.73%  |
| FTC133-p17 | (P26038) Moesin (Membrane-organizing extension spike protein)                                                                                             | MOES_HUMAN  | 67673 | 99%  | 2  | 2  | 5  | 0.04% | 4.34%  |
| FTC133-p17 | (P26447) Protein S100-A4 (S100 calcium-binding protein A4) (Metastasin) (Mts1 protein) (Placental calcium-binding protein) (Calvasculin)                  | S10A4_HUMAN | 11711 | 100% | 3  | 3  | 4  | 0.04% | 27.70% |
| FTC133-p17 | (P26599) Polypyrimidine tract-binding protein 1 (PTB) (Heterogeneous nuclear ribonucleoprotein I) (hnRNP I) (57 kDa RNA-binding protein PPTB-1)           | PTBP1_HUMAN | 57205 | 100% | 2  | 2  | 3  | 0.03% | 7.34%  |
| FTC133-p17 | (P26599) Polypyrimidine tract-binding protein 1 (PTB) (Heterogeneous nuclear ribonucleoprotein I) (hnRNP I) (57 kDa RNA-binding protein PPTB-1)           | PTBP1_HUMAN | 57205 | 100% | 2  | 2  | 2  | 0.02% | 5.27%  |
| FTC133-p17 | (P26641) Elongation factor 1-gamma (EF-1-gamma) (eEF-1B gamma)                                                                                            | EF1G_HUMAN  | 49970 | 100% | 2  | 2  | 2  | 0.02% | 6.19%  |
| FTC133-p17 | (P26641) Elongation factor 1-gamma (EF-1-gamma) (eEF-1B gamma)                                                                                            | EF1G_HUMAN  | 49970 | 100% | 2  | 2  | 2  | 0.02% | 5.28%  |
| FTC133-p17 | (P27348) 14-3-3 protein theta (14-3-3 protein tau) (14-3-3 protein T-cell) (HS1 protein)                                                                  | 1433T_HUMAN | 27747 | 100% | 2  | 2  | 3  | 0.03% | 20.80% |
| FTC133-p17 | (P27348) 14-3-3 protein theta (14-3-3 protein tau) (14-3-3 protein T-cell) (HS1 protein)                                                                  | 1433T_HUMAN | 27747 | 100% | 2  | 2  | 2  | 0.02% | 22.90% |
| FTC133-p17 | (P27348) 14-3-3 protein theta (14-3-3 protein tau) (14-3-3 protein T-cell) (HS1 protein)                                                                  | 1433T_HUMAN | 27747 | 100% | 2  | 2  | 2  | 0.02% | 20.00% |
| FTC133-p17 | (P27348) 14-3-3 protein theta (14-3-3 protein tau) (14-3-3 protein T-cell) (HS1 protein)                                                                  | 1433T_HUMAN | 27747 | 100% | 2  | 3  | 3  | 0.03% | 12.70% |
| FTC133-p17 | (P27797) Calreticulin precursor (CRP55) (Calregulin) (HACBP) (ERp60) (grp60)                                                                              | CRTC_HUMAN  | 48125 | 100% | 3  | 3  | 3  | 0.03% | 16.50% |

Protein Identified Sequence Coverage in FTC-133

|            |                                                                                                                                                                                                                                                    |             |        |      |   |   |   |       |        |
|------------|----------------------------------------------------------------------------------------------------------------------------------------------------------------------------------------------------------------------------------------------------|-------------|--------|------|---|---|---|-------|--------|
| FTC133-p17 | (P27797) Calreticulin precursor (CRP55) (Calregulin) (HACBP) (ERp60) (grp60)                                                                                                                                                                       | CRTC_HUMAN  | 48125  | 100% | 4 | 4 | 4 | 0.05% | 22.30% |
| FTC133-p17 | (P27797) Calreticulin precursor (CRP55) (Calregulin) (HACBP) (ERp60) (grp60)                                                                                                                                                                       | CRTC_HUMAN  | 48125  | 100% | 2 | 2 | 3 | 0.03% | 10.30% |
| FTC133-p17 | (P27797) Calreticulin precursor (CRP55) (Calregulin) (HACBP) (ERp60) (grp60)                                                                                                                                                                       | CRTC_HUMAN  | 48125  | 100% | 4 | 4 | 8 | 0.07% | 25.40% |
| FTC133-p17 | (P27816) Microtubule-associated protein 4 (MAP 4)                                                                                                                                                                                                  | MAP4_HUMAN  | 121003 | 100% | 2 | 2 | 2 | 0.02% | 2.43%  |
| FTC133-p17 | (P27816) Microtubule-associated protein 4 (MAP 4)                                                                                                                                                                                                  | MAP4_HUMAN  | 121003 | 100% | 2 | 2 | 2 | 0.02% | 2.43%  |
| FTC133-p17 | (P29401) Transketolase (EC 2.2.1.1) (TK)                                                                                                                                                                                                           | TKT_HUMAN   | 67861  | 100% | 2 | 2 | 2 | 0.02% | 5.94%  |
| FTC133-p17 | (P29401) Transketolase (EC 2.2.1.1) (TK)                                                                                                                                                                                                           | TKT_HUMAN   | 67861  | 100% | 4 | 4 | 4 | 0.04% | 11.40% |
| FTC133-p17 | (P29401) Transketolase (EC 2.2.1.1) (TK)                                                                                                                                                                                                           | TKT_HUMAN   | 67861  | 100% | 2 | 2 | 2 | 0.02% | 7.22%  |
| FTC133-p17 | (P29401) Transketolase (EC 2.2.1.1) (TK)                                                                                                                                                                                                           | TKT_HUMAN   | 67861  | 100% | 2 | 3 | 3 | 0.03% | 4.65%  |
| FTC133-p17 | (P29966) Myristoylated alanine-rich C-kinase substrate (MARCKS) (Protein kinase C substrate, 80 kDa protein, light chain) (PKCSL) (80K-L protein)                                                                                                  | MARCS_HUMAN | 31405  | 100% | 2 | 2 | 3 | 0.03% | 10.30% |
| FTC133-p17 | (P30040) Endoplasmic reticulum protein ERp29 precursor (ERp31) (ERp28)                                                                                                                                                                             | ERP29_HUMAN | 28977  | 100% | 2 | 2 | 2 | 0.02% | 18.00% |
| FTC133-p17 | (P30041) Peroxiredoxin-6 (EC 1.11.1.15) (Antioxidant protein 2) (1-Cys peroxiredoxin) (1-Cys PRX) (Acidic calcium-independent phospholipase A2) (EC 3.1.1.-) (aiPLA2) (Non-selenium glutathione peroxidase) (EC 1.11.1.7) (NSGPx) (24 kDa protein) | PRDX6_HUMAN | 24887  | 100% | 2 | 2 | 4 | 0.04% | 13.50% |
| FTC133-p17 | (P30041) Peroxiredoxin-6 (EC 1.11.1.15) (Antioxidant protein 2) (1-Cys peroxiredoxin) (1-Cys PRX) (Acidic calcium-independent phospholipase A2) (EC 3.1.1.-) (aiPLA2) (Non-selenium glutathione peroxidase) (EC 1.11.1.7) (NSGPx) (24 kDa protein) | PRDX6_HUMAN | 24887  | 100% | 3 | 3 | 5 | 0.05% | 18.40% |
| FTC133-p17 | (P30041) Peroxiredoxin-6 (EC 1.11.1.15) (Antioxidant protein 2) (1-Cys peroxiredoxin) (1-Cys PRX) (Acidic calcium-independent phospholipase A2) (EC 3.1.1.-) (aiPLA2) (Non-selenium glutathione peroxidase) (EC 1.11.1.7) (NSGPx) (24 kDa protein) | PRDX6_HUMAN | 24887  | 100% | 4 | 5 | 7 | 0.06% | 23.80% |
| FTC133-p17 | (P30041) Peroxiredoxin-6 (EC 1.11.1.15) (Antioxidant protein 2) (1-Cys peroxiredoxin) (1-Cys PRX) (Acidic calcium-independent phospholipase A2) (EC 3.1.1.-) (aiPLA2) (Non-selenium glutathione peroxidase) (EC 1.11.1.7) (NSGPx) (24 kDa protein) | PRDX6_HUMAN | 24887  | 100% | 3 | 3 | 6 | 0.07% | 18.40% |
| FTC133-p17 | (P30041) Peroxiredoxin-6 (EC 1.11.1.15) (Antioxidant protein 2) (1-Cys peroxiredoxin) (1-Cys PRX) (Acidic calcium-independent phospholipase A2) (EC 3.1.1.-) (aiPLA2) (Non-selenium glutathione peroxidase) (EC 1.11.1.7) (NSGPx) (24 kDa protein) | PRDX6_HUMAN | 24887  | 100% | 3 | 4 | 7 | 0.07% | 18.40% |
| FTC133-p17 | (P30041) Peroxiredoxin-6 (EC 1.11.1.15) (Antioxidant protein 2) (1-Cys peroxiredoxin) (1-Cys PRX) (Acidic calcium-independent phospholipase A2) (EC 3.1.1.-) (aiPLA2) (Non-selenium glutathione peroxidase) (EC 1.11.1.7) (NSGPx) (24 kDa protein) | PRDX6_HUMAN | 24887  | 100% | 2 | 3 | 4 | 0.03% | 15.70% |

## Protein Identified Sequence Coverage in FTC-133

|            |                                                                                                                                                                                                                                                    |             |       |      |    |    |    |       |        |
|------------|----------------------------------------------------------------------------------------------------------------------------------------------------------------------------------------------------------------------------------------------------|-------------|-------|------|----|----|----|-------|--------|
| FTC133-p17 | (P30044) Peroxiredoxin-5, mitochondrial precursor (EC 1.11.1.15) (Prx-V) (Peroxisomal antioxidant enzyme) (PLP) (Thioredoxin reductase) (Thioredoxin peroxidase PMP20) (Antioxidant enzyme B166) (AOEB166) (TPx type VI) (Liver tissue 2D-page spo | PRDX5_HUMAN | 22008 | 100% | 2  | 2  | 2  | 0.02% | 13.10% |
| FTC133-p17 | (P30101) Protein disulfide-isomerase A3 precursor (EC 5.3.4.1) (Disulfide isomerase ER-60) (ERp60) (58 kDa microsomal protein) (p58) (ERp57) (58 kDa glucose-regulated protein)                                                                    | PDIA3_HUMAN | 56767 | 100% | 8  | 8  | 11 | 0.10% | 21.40% |
| FTC133-p17 | (P30101) Protein disulfide-isomerase A3 precursor (EC 5.3.4.1) (Disulfide isomerase ER-60) (ERp60) (58 kDa microsomal protein) (p58) (ERp57) (58 kDa glucose-regulated protein)                                                                    | PDIA3_HUMAN | 56767 | 100% | 10 | 10 | 16 | 0.15% | 22.00% |
| FTC133-p17 | (P30101) Protein disulfide-isomerase A3 precursor (EC 5.3.4.1) (Disulfide isomerase ER-60) (ERp60) (58 kDa microsomal protein) (p58) (ERp57) (58 kDa glucose-regulated protein)                                                                    | PDIA3_HUMAN | 56767 | 100% | 3  | 3  | 3  | 0.04% | 11.10% |
| FTC133-p17 | (P30101) Protein disulfide-isomerase A3 precursor (EC 5.3.4.1) (Disulfide isomerase ER-60) (ERp60) (58 kDa microsomal protein) (p58) (ERp57) (58 kDa glucose-regulated protein)                                                                    | PDIA3_HUMAN | 56767 | 100% | 2  | 2  | 3  | 0.05% | 8.91%  |
| FTC133-p17 | (P30101) Protein disulfide-isomerase A3 precursor (EC 5.3.4.1) (Disulfide isomerase ER-60) (ERp60) (58 kDa microsomal protein) (p58) (ERp57) (58 kDa glucose-regulated protein)                                                                    | PDIA3_HUMAN | 56767 | 100% | 10 | 10 | 13 | 0.12% | 24.60% |
| FTC133-p17 | (P30101) Protein disulfide-isomerase A3 precursor (EC 5.3.4.1) (Disulfide isomerase ER-60) (ERp60) (58 kDa microsomal protein) (p58) (ERp57) (58 kDa glucose-regulated protein)                                                                    | PDIA3_HUMAN | 56767 | 100% | 3  | 3  | 4  | 0.03% | 7.92%  |
| FTC133-p17 | (P31949) Protein S100-A11 (S100 calcium-binding protein A11) (Protein S100C) (Calgizzarin) (MLN 70)                                                                                                                                                | S10AB_HUMAN | 11723 | 100% | 2  | 2  | 2  | 0.02% | 25.70% |
| FTC133-p17 | (P31949) Protein S100-A11 (S100 calcium-binding protein A11) (Protein S100C) (Calgizzarin) (MLN 70)                                                                                                                                                | S10AB_HUMAN | 11723 | 100% | 2  | 2  | 2  | 0.02% | 25.70% |
| FTC133-p17 | (P31949) Protein S100-A11 (S100 calcium-binding protein A11) (Protein S100C) (Calgizzarin) (MLN 70)                                                                                                                                                | S10AB_HUMAN | 11723 | 100% | 2  | 2  | 3  | 0.03% | 25.70% |
| FTC133-p17 | (P32119) Peroxiredoxin-2 (EC 1.11.1.15) (Thioredoxin peroxidase 1) (Thioredoxin-dependent peroxide reductase 1) (Thiol-specific antioxidant protein) (TSA) (PRP) (Natural killer cell-enhancing factor B) (NKEF-B)                                 | PRDX2_HUMAN | 21743 | 100% | 2  | 2  | 3  | 0.03% | 14.70% |
| FTC133-p17 | (P32119) Peroxiredoxin-2 (EC 1.11.1.15) (Thioredoxin peroxidase 1) (Thioredoxin-dependent peroxide reductase 1) (Thiol-specific antioxidant protein) (TSA) (PRP) (Natural killer cell-enhancing factor B) (NKEF-B)                                 | PRDX2_HUMAN | 21743 | 100% | 3  | 3  | 3  | 0.04% | 19.80% |
| FTC133-p17 | (P32119) Peroxiredoxin-2 (EC 1.11.1.15) (Thioredoxin peroxidase 1) (Thioredoxin-dependent peroxide reductase 1) (Thiol-specific antioxidant protein) (TSA) (PRP) (Natural killer cell-enhancing factor B) (NKEF-B)                                 | PRDX2_HUMAN | 21743 | 100% | 3  | 4  | 7  | 0.07% | 19.80% |
| FTC133-p17 | (P32970) Tumor necrosis factor ligand superfamily member 7 (CD27 ligand) (CD27-L) (CD70 antigen)                                                                                                                                                   | TNLF7_HUMAN | 21100 | 100% | 2  | 2  | 2  | 0.02% | 12.40% |

## Protein Identified Sequence Coverage in FTC-133

|            |                                                                                                                                                                                                                                                    |             |       |      |   |    |    |       |        |
|------------|----------------------------------------------------------------------------------------------------------------------------------------------------------------------------------------------------------------------------------------------------|-------------|-------|------|---|----|----|-------|--------|
| FTC133-p17 | (P35052) Glypican-1 precursor                                                                                                                                                                                                                      | GPC1_HUMAN  | 61633 | 100% | 2 | 2  | 2  | 0.02% | 6.63%  |
| FTC133-p17 | (P35241) Radixin                                                                                                                                                                                                                                   | RADI_HUMAN  | 68548 | 100% | 2 | 2  | 2  | 0.02% | 8.23%  |
| FTC133-p17 | (P35241) Radixin                                                                                                                                                                                                                                   | RADI_HUMAN  | 68548 | 100% | 2 | 2  | 2  | 0.02% | 5.32%  |
| FTC133-p17 | (P37802) Transgelin-2 (SM22-alpha homolog)                                                                                                                                                                                                         | TAGL2_HUMAN | 22243 | 100% | 6 | 6  | 10 | 0.09% | 40.40% |
| FTC133-p17 | (P37802) Transgelin-2 (SM22-alpha homolog)                                                                                                                                                                                                         | TAGL2_HUMAN | 22243 | 100% | 6 | 6  | 14 | 0.13% | 40.40% |
| FTC133-p17 | (P37802) Transgelin-2 (SM22-alpha homolog)                                                                                                                                                                                                         | TAGL2_HUMAN | 22243 | 100% | 4 | 4  | 8  | 0.10% | 29.30% |
| FTC133-p17 | (P37802) Transgelin-2 (SM22-alpha homolog)                                                                                                                                                                                                         | TAGL2_HUMAN | 22243 | 100% | 2 | 2  | 2  | 0.03% | 11.10% |
| FTC133-p17 | (P37802) Transgelin-2 (SM22-alpha homolog)                                                                                                                                                                                                         | TAGL2_HUMAN | 22243 | 100% | 5 | 5  | 7  | 0.07% | 34.80% |
| FTC133-p17 | (P37802) Transgelin-2 (SM22-alpha homolog)                                                                                                                                                                                                         | TAGL2_HUMAN | 22243 | 100% | 3 | 3  | 6  | 0.05% | 22.20% |
| FTC133-p17 | (P37837) Transaldolase (EC 2.2.1.2)                                                                                                                                                                                                                | TALDO_HUMAN | 37524 | 100% | 2 | 2  | 3  | 0.03% | 6.53%  |
| FTC133-p17 | (P37837) Transaldolase (EC 2.2.1.2)                                                                                                                                                                                                                | TALDO_HUMAN | 37524 | 100% | 6 | 6  | 12 | 0.11% | 22.30% |
| FTC133-p17 | (P37837) Transaldolase (EC 2.2.1.2)                                                                                                                                                                                                                | TALDO_HUMAN | 37524 | 100% | 8 | 8  | 16 | 0.15% | 24.60% |
| FTC133-p17 | (P37837) Transaldolase (EC 2.2.1.2)                                                                                                                                                                                                                | TALDO_HUMAN | 37524 | 100% | 2 | 2  | 3  | 0.04% | 7.12%  |
| FTC133-p17 | (P37837) Transaldolase (EC 2.2.1.2)                                                                                                                                                                                                                | TALDO_HUMAN | 37524 | 100% | 3 | 3  | 4  | 0.07% | 10.40% |
| FTC133-p17 | (P37837) Transaldolase (EC 2.2.1.2)                                                                                                                                                                                                                | TALDO_HUMAN | 37524 | 100% | 6 | 6  | 11 | 0.10% | 19.30% |
| FTC133-p17 | (P39019) 40S ribosomal protein S19                                                                                                                                                                                                                 | RS19_HUMAN  | 15911 | 100% | 2 | 2  | 2  | 0.02% | 12.50% |
| FTC133-p17 | (P39019) 40S ribosomal protein S19                                                                                                                                                                                                                 | RS19_HUMAN  | 15911 | 100% | 2 | 2  | 2  | 0.02% | 12.50% |
| FTC133-p17 | (P40926) Malate dehydrogenase, mitochondrial precursor (EC 1.1.1.37)                                                                                                                                                                               | MDHM_HUMAN  | 35514 | 100% | 2 | 2  | 2  | 0.02% | 8.88%  |
| FTC133-p17 | (P42167) Lamina-associated polypeptide 2, isoforms beta/gamma (Thymopoietin, isoforms beta/gamma) (TP beta/gamma) (Thymopoietin-related peptide isoforms beta/gamma) (TPRP isoforms beta/gamma) [Contains: Thymopoietin (TP) (Splenin); Thymopenti | LAP2B_HUMAN | 50522 | 100% | 2 | 2  | 2  | 0.02% | 5.52%  |
| FTC133-p17 | (P42167) Lamina-associated polypeptide 2, isoforms beta/gamma (Thymopoietin, isoforms beta/gamma) (TP beta/gamma) (Thymopoietin-related peptide isoforms beta/gamma) (TPRP isoforms beta/gamma) [Contains: Thymopoietin (TP) (Splenin); Thymopenti | LAP2B_HUMAN | 50522 | 100% | 3 | 3  | 3  | 0.03% | 9.05%  |
| FTC133-p17 | (P42785) Lysosomal Pro-X carboxypeptidase precursor (EC 3.4.16.2) (Prolylcarboxypeptidase) (PRCP) (Proline carboxypeptidase) (Angiotensinase C) (Lysosomal carboxypeptidase C)                                                                     | PCP_HUMAN   | 55783 | 100% | 2 | 2  | 2  | 0.02% | 5.24%  |
| FTC133-p17 | (P43490) Nicotinamide phosphoribosyltransferase (EC 2.4.2.12) (NAMPRTase) (Nampt) (Pre-B cell-enhancing factor) (Pre-B-cell colony-enhancing factor 1) (Visfatin)                                                                                  | NAMPT_HUMAN | 55505 | 100% | 4 | 4  | 5  | 0.05% | 14.10% |
| FTC133-p17 | (P43490) Nicotinamide phosphoribosyltransferase (EC 2.4.2.12) (NAMPRTase) (Nampt) (Pre-B cell-enhancing factor) (Pre-B-cell colony-enhancing factor 1) (Visfatin)                                                                                  | NAMPT_HUMAN | 55505 | 100% | 7 | 10 | 18 | 0.17% | 23.60% |
| FTC133-p17 | (P43490) Nicotinamide phosphoribosyltransferase (EC 2.4.2.12) (NAMPRTase) (Nampt) (Pre-B cell-enhancing factor) (Pre-B-cell colony-enhancing factor 1) (Visfatin)                                                                                  | NAMPT_HUMAN | 55505 | 100% | 8 | 8  | 12 | 0.11% | 25.70% |
| FTC133-p17 | (P43490) Nicotinamide phosphoribosyltransferase (EC 2.4.2.12) (NAMPRTase) (Nampt) (Pre-B cell-enhancing factor) (Pre-B-cell colony-enhancing factor 1) (Visfatin)                                                                                  | NAMPT_HUMAN | 55505 | 100% | 8 | 11 | 16 | 0.19% | 25.70% |

## Protein Identified Sequence Coverage in FTC-133

|            |                                                                                                                                                                   |             |        |      |   |    |    |       |        |
|------------|-------------------------------------------------------------------------------------------------------------------------------------------------------------------|-------------|--------|------|---|----|----|-------|--------|
| FTC133-p17 | (P43490) Nicotinamide phosphoribosyltransferase (EC 2.4.2.12) (NAMPRtase) (Nampt) (Pre-B cell-enhancing factor) (Pre-B-cell colony-enhancing factor 1) (Visfatin) | NAMPT_HUMAN | 55505  | 100% | 3 | 3  | 3  | 0.05% | 12.60% |
| FTC133-p17 | (P43490) Nicotinamide phosphoribosyltransferase (EC 2.4.2.12) (NAMPRtase) (Nampt) (Pre-B cell-enhancing factor) (Pre-B-cell colony-enhancing factor 1) (Visfatin) | NAMPT_HUMAN | 55505  | 100% | 8 | 10 | 16 | 0.15% | 26.30% |
| FTC133-p17 | (P43490) Nicotinamide phosphoribosyltransferase (EC 2.4.2.12) (NAMPRtase) (Nampt) (Pre-B cell-enhancing factor) (Pre-B-cell colony-enhancing factor 1) (Visfatin) | NAMPT_HUMAN | 55505  | 100% | 2 | 2  | 5  | 0.05% | 8.35%  |
| FTC133-p17 | (P43490) Nicotinamide phosphoribosyltransferase (EC 2.4.2.12) (NAMPRtase) (Nampt) (Pre-B cell-enhancing factor) (Pre-B-cell colony-enhancing factor 1) (Visfatin) | NAMPT_HUMAN | 55505  | 100% | 3 | 4  | 6  | 0.05% | 10.80% |
| FTC133-p17 | (P43490) Nicotinamide phosphoribosyltransferase (EC 2.4.2.12) (NAMPRtase) (Nampt) (Pre-B cell-enhancing factor) (Pre-B-cell colony-enhancing factor 1) (Visfatin) | NAMPT_HUMAN | 55505  | 100% | 4 | 5  | 6  | 0.05% | 15.90% |
| FTC133-p17 | (P43490) Nicotinamide phosphoribosyltransferase (EC 2.4.2.12) (NAMPRtase) (Nampt) (Pre-B cell-enhancing factor) (Pre-B-cell colony-enhancing factor 1) (Visfatin) | NAMPT_HUMAN | 55505  | 100% | 2 | 3  | 3  | 0.03% | 8.35%  |
| FTC133-p17 | (P46821) Microtubule-associated protein 1B (MAP 1B) [Contains: MAP1 light chain LC1]                                                                              | MAP1B_HUMAN | 270602 | 100% | 2 | 2  | 3  | 0.03% | 1.18%  |
| FTC133-p17 | (P46821) Microtubule-associated protein 1B (MAP 1B) [Contains: MAP1 light chain LC1]                                                                              | MAP1B_HUMAN | 270602 | 100% | 2 | 2  | 2  | 0.02% | 0.85%  |
| FTC133-p17 | (P46976) Glycogenin-1 (EC 2.4.1.186)                                                                                                                              | GLYG_HUMAN  | 39235  | 100% | 2 | 2  | 2  | 0.02% | 7.45%  |
| FTC133-p17 | (P46976) Glycogenin-1 (EC 2.4.1.186)                                                                                                                              | GLYG_HUMAN  | 39235  | 100% | 4 | 5  | 8  | 0.08% | 9.17%  |
| FTC133-p17 | (P46976) Glycogenin-1 (EC 2.4.1.186)                                                                                                                              | GLYG_HUMAN  | 39235  | 100% | 3 | 3  | 7  | 0.06% | 7.16%  |
| FTC133-p17 | (P46976) Glycogenin-1 (EC 2.4.1.186)                                                                                                                              | GLYG_HUMAN  | 39235  | 100% | 3 | 4  | 6  | 0.07% | 9.46%  |
| FTC133-p17 | (P46976) Glycogenin-1 (EC 2.4.1.186)                                                                                                                              | GLYG_HUMAN  | 39235  | 100% | 5 | 6  | 14 | 0.13% | 12.00% |
| FTC133-p17 | (P47755) F-actin capping protein alpha-2 subunit (CapZ alpha-2)                                                                                                   | CAZA2_HUMAN | 32800  | 100% | 2 | 2  | 3  | 0.03% | 11.90% |
| FTC133-p17 | (P47755) F-actin capping protein alpha-2 subunit (CapZ alpha-2)                                                                                                   | CAZA2_HUMAN | 32800  | 100% | 2 | 2  | 2  | 0.02% | 8.77%  |
| FTC133-p17 | (P49366) Deoxyhypusine synthase (EC 2.5.1.46) (DHS)                                                                                                               | DHYS_HUMAN  | 40953  | 100% | 4 | 4  | 6  | 0.06% | 19.00% |
| FTC133-p17 | (P49366) Deoxyhypusine synthase (EC 2.5.1.46) (DHS)                                                                                                               | DHYS_HUMAN  | 40953  | 100% | 2 | 2  | 2  | 0.02% | 8.67%  |
| FTC133-p17 | (P49366) Deoxyhypusine synthase (EC 2.5.1.46) (DHS)                                                                                                               | DHYS_HUMAN  | 40953  | 100% | 2 | 2  | 2  | 0.02% | 8.40%  |
| FTC133-p17 | (P50454) Collagen-binding protein 2 precursor (Colligin 2) (Rheumatoid arthritis-related antigen RA-A47) (Serpin H2)                                              | SPH2_HUMAN  | 46424  | 100% | 3 | 4  | 6  | 0.06% | 12.40% |
| FTC133-p17 | (P50454) Collagen-binding protein 2 precursor (Colligin 2) (Rheumatoid arthritis-related antigen RA-A47) (Serpin H2)                                              | SPH2_HUMAN  | 46424  | 100% | 2 | 2  | 2  | 0.02% | 9.81%  |

## Protein Identified Sequence Coverage in FTC-133

|            |                                                                                                                                                                                           |             |       |      |   |   |   |       |        |
|------------|-------------------------------------------------------------------------------------------------------------------------------------------------------------------------------------------|-------------|-------|------|---|---|---|-------|--------|
| FTC133-p17 | (P50454) Collagen-binding protein 2 precursor (Colligin 2) (Rheumatoid arthritis-related antigen RA-A47) (Serpin H2)                                                                      | SPH2_HUMAN  | 46424 | 100% | 3 | 3 | 3 | 0.03% | 12.00% |
| FTC133-p17 | (P50897) Palmitoyl-protein thioesterase 1 precursor (EC 3.1.2.22) (Palmitoyl-protein hydrolase 1)                                                                                         | PPT1_HUMAN  | 34176 | 100% | 2 | 2 | 2 | 0.02% | 9.15%  |
| FTC133-p17 | (P50897) Palmitoyl-protein thioesterase 1 precursor (EC 3.1.2.22) (Palmitoyl-protein hydrolase 1)                                                                                         | PPT1_HUMAN  | 34176 | 100% | 2 | 2 | 2 | 0.02% | 9.15%  |
| FTC133-p17 | (P50991) T-complex protein 1 subunit delta (TCP-1-delta) (CCT-delta) (Stimulator of TAR RNA-binding)                                                                                      | TCPD_HUMAN  | 57777 | 100% | 2 | 2 | 2 | 0.02% | 5.39%  |
| FTC133-p17 | (P50991) T-complex protein 1 subunit delta (TCP-1-delta) (CCT-delta) (Stimulator of TAR RNA-binding)                                                                                      | TCPD_HUMAN  | 57777 | 100% | 2 | 2 | 2 | 0.02% | 4.83%  |
| FTC133-p17 | (P51665) 26S proteasome non-ATPase regulatory subunit 7 (26S proteasome regulatory subunit rpn8) (26S proteasome regulatory subunit S12) (Proteasome subunit p40) (Mov34 protein homolog) | PSD7_HUMAN  | 37008 | 100% | 2 | 2 | 4 | 0.04% | 5.86%  |
| FTC133-p17 | (P51665) 26S proteasome non-ATPase regulatory subunit 7 (26S proteasome regulatory subunit rpn8) (26S proteasome regulatory subunit S12) (Proteasome subunit p40) (Mov34 protein homolog) | PSD7_HUMAN  | 37008 | 100% | 2 | 2 | 2 | 0.02% | 8.33%  |
| FTC133-p17 | (P51665) 26S proteasome non-ATPase regulatory subunit 7 (26S proteasome regulatory subunit rpn8) (26S proteasome regulatory subunit S12) (Proteasome subunit p40) (Mov34 protein homolog) | PSD7_HUMAN  | 37008 | 100% | 2 | 2 | 2 | 0.02% | 11.10% |
| FTC133-p17 | (P51688) N-sulphoglucosamine sulphohydrolase precursor (EC 3.10.1.1) (Sulfoglucosamine sulfamidase) (Sulphamidase)                                                                        | SPHM_HUMAN  | 56678 | 100% | 4 | 4 | 7 | 0.07% | 13.70% |
| FTC133-p17 | (P51688) N-sulphoglucosamine sulphohydrolase precursor (EC 3.10.1.1) (Sulfoglucosamine sulfamidase) (Sulphamidase)                                                                        | SPHM_HUMAN  | 56678 | 100% | 2 | 2 | 2 | 0.02% | 4.78%  |
| FTC133-p17 | (P51688) N-sulphoglucosamine sulphohydrolase precursor (EC 3.10.1.1) (Sulfoglucosamine sulfamidase) (Sulphamidase)                                                                        | SPHM_HUMAN  | 56678 | 100% | 3 | 3 | 3 | 0.03% | 6.37%  |
| FTC133-p17 | (P51688) N-sulphoglucosamine sulphohydrolase precursor (EC 3.10.1.1) (Sulfoglucosamine sulfamidase) (Sulphamidase)                                                                        | SPHM_HUMAN  | 56678 | 100% | 3 | 3 | 4 | 0.04% | 7.37%  |
| FTC133-p17 | (P51688) N-sulphoglucosamine sulphohydrolase precursor (EC 3.10.1.1) (Sulfoglucosamine sulfamidase) (Sulphamidase)                                                                        | SPHM_HUMAN  | 56678 | 100% | 4 | 4 | 9 | 0.08% | 8.96%  |
| FTC133-p17 | (P51688) N-sulphoglucosamine sulphohydrolase precursor (EC 3.10.1.1) (Sulfoglucosamine sulfamidase) (Sulphamidase)                                                                        | SPHM_HUMAN  | 56678 | 100% | 4 | 4 | 6 | 0.06% | 9.16%  |
| FTC133-p17 | (P51688) N-sulphoglucosamine sulphohydrolase precursor (EC 3.10.1.1) (Sulfoglucosamine sulfamidase) (Sulphamidase)                                                                        | SPHM_HUMAN  | 56678 | 100% | 2 | 2 | 5 | 0.06% | 4.98%  |
| FTC133-p17 | (P51688) N-sulphoglucosamine sulphohydrolase precursor (EC 3.10.1.1) (Sulfoglucosamine sulfamidase) (Sulphamidase)                                                                        | SPHM_HUMAN  | 56678 | 100% | 4 | 4 | 5 | 0.05% | 9.16%  |
| FTC133-p17 | (P52272) Heterogeneous nuclear ribonucleoprotein M (hnRNP M)                                                                                                                              | HNRPM_HUMAN | 77368 | 100% | 3 | 4 | 8 | 0.08% | 6.17%  |

## Protein Identified Sequence Coverage in FTC-133

|            |                                                                                                                                                                                                                                                     |             |       |      |   |   |    |       |        |
|------------|-----------------------------------------------------------------------------------------------------------------------------------------------------------------------------------------------------------------------------------------------------|-------------|-------|------|---|---|----|-------|--------|
| FTC133-p17 | (P52272) Heterogeneous nuclear ribonucleoprotein M (hnRNP M)                                                                                                                                                                                        | HNRPM_HUMAN | 77368 | 100% | 4 | 4 | 4  | 0.04% | 7.68%  |
| FTC133-p17 | (P52272) Heterogeneous nuclear ribonucleoprotein M (hnRNP M)                                                                                                                                                                                        | HNRPM_HUMAN | 77368 | 100% | 3 | 3 | 4  | 0.07% | 5.90%  |
| FTC133-p17 | (P52272) Heterogeneous nuclear ribonucleoprotein M (hnRNP M)                                                                                                                                                                                        | HNRPM_HUMAN | 77368 | 100% | 3 | 3 | 4  | 0.04% | 5.62%  |
| FTC133-p17 | (P52565) Rho GDP-dissociation inhibitor 1 (Rho GDI 1) (Rho-GDI alpha)                                                                                                                                                                               | GDIR_HUMAN  | 23058 | 100% | 3 | 3 | 3  | 0.03% | 14.30% |
| FTC133-p17 | (P53365) Arfaptin-2 (ADP-ribosylation factor-interacting protein 2) (Partner of RAC1) (POR1 protein)                                                                                                                                                | ARFP2_HUMAN | 37839 | 100% | 2 | 2 | 3  | 0.03% | 6.74%  |
| FTC133-p17 | (P53365) Arfaptin-2 (ADP-ribosylation factor-interacting protein 2) (Partner of RAC1) (POR1 protein)                                                                                                                                                | ARFP2_HUMAN | 37839 | 100% | 2 | 2 | 2  | 0.02% | 6.74%  |
| FTC133-p17 | (P53367) Arfaptin-1 (ADP-ribosylation factor-interacting protein 1)                                                                                                                                                                                 | ARFP1_HUMAN | 41722 | 99%  | 2 | 2 | 2  | 0.02% | 8.85%  |
| FTC133-p17 | (P53634) Dipeptidyl-peptidase 1 precursor (EC 3.4.14.1) (Dipeptidyl-peptidase I) (DPP-I) (DPPI) (Cathepsin C) (Cathepsin J) (Dipeptidyl transferase) [Contains: Dipeptidyl-peptidase 1 exclusion domain chain (Dipeptidyl-peptidase I exclusion dom | CATC_HUMAN  | 51824 | 100% | 2 | 2 | 2  | 0.02% | 6.70%  |
| FTC133-p17 | (P54577) Tyrosyl-tRNA synthetase, cytoplasmic (EC 6.1.1.1) (Tyrosyl--tRNA ligase) (TyrRS)                                                                                                                                                           | SYYC_HUMAN  | 58996 | 100% | 2 | 2 | 2  | 0.02% | 3.61%  |
| FTC133-p17 | (P54577) Tyrosyl-tRNA synthetase, cytoplasmic (EC 6.1.1.1) (Tyrosyl--tRNA ligase) (TyrRS)                                                                                                                                                           | SYYC_HUMAN  | 58996 | 100% | 5 | 5 | 8  | 0.08% | 12.50% |
| FTC133-p17 | (P54577) Tyrosyl-tRNA synthetase, cytoplasmic (EC 6.1.1.1) (Tyrosyl--tRNA ligase) (TyrRS)                                                                                                                                                           | SYYC_HUMAN  | 58996 | 100% | 6 | 6 | 8  | 0.07% | 17.50% |
| FTC133-p17 | (P54577) Tyrosyl-tRNA synthetase, cytoplasmic (EC 6.1.1.1) (Tyrosyl--tRNA ligase) (TyrRS)                                                                                                                                                           | SYYC_HUMAN  | 58996 | 100% | 4 | 4 | 5  | 0.06% | 8.35%  |
| FTC133-p17 | (P54577) Tyrosyl-tRNA synthetase, cytoplasmic (EC 6.1.1.1) (Tyrosyl--tRNA ligase) (TyrRS)                                                                                                                                                           | SYYC_HUMAN  | 58996 | 100% | 5 | 5 | 8  | 0.08% | 11.80% |
| FTC133-p17 | (P55145) ARMET protein precursor (Arginine-rich protein)                                                                                                                                                                                            | ARMET_HUMAN | 20240 | 100% | 3 | 3 | 5  | 0.05% | 17.30% |
| FTC133-p17 | (P55145) ARMET protein precursor (Arginine-rich protein)                                                                                                                                                                                            | ARMET_HUMAN | 20240 | 100% | 2 | 2 | 2  | 0.02% | 16.20% |
| FTC133-p17 | (P55145) ARMET protein precursor (Arginine-rich protein)                                                                                                                                                                                            | ARMET_HUMAN | 20240 | 100% | 3 | 3 | 3  | 0.04% | 21.80% |
| FTC133-p17 | (P55145) ARMET protein precursor (Arginine-rich protein)                                                                                                                                                                                            | ARMET_HUMAN | 20240 | 100% | 3 | 3 | 3  | 0.03% | 17.30% |
| FTC133-p17 | (P55327) Tumor protein D52 (N8 protein)                                                                                                                                                                                                             | TPD52_HUMAN | 19845 | 100% | 2 | 2 | 3  | 0.03% | 14.10% |
| FTC133-p17 | (P55327) Tumor protein D52 (N8 protein)                                                                                                                                                                                                             | TPD52_HUMAN | 19845 | 100% | 2 | 2 | 2  | 0.02% | 13.60% |
| FTC133-p17 | (P55327) Tumor protein D52 (N8 protein)                                                                                                                                                                                                             | TPD52_HUMAN | 19845 | 100% | 4 | 5 | 9  | 0.09% | 38.00% |
| FTC133-p17 | (P55327) Tumor protein D52 (N8 protein)                                                                                                                                                                                                             | TPD52_HUMAN | 19845 | 100% | 7 | 8 | 13 | 0.12% | 62.50% |
| FTC133-p17 | (P55327) Tumor protein D52 (N8 protein)                                                                                                                                                                                                             | TPD52_HUMAN | 19845 | 100% | 7 | 8 | 15 | 0.14% | 62.50% |
| FTC133-p17 | (P55327) Tumor protein D52 (N8 protein)                                                                                                                                                                                                             | TPD52_HUMAN | 19845 | 100% | 6 | 7 | 14 | 0.17% | 56.00% |
| FTC133-p17 | (P55327) Tumor protein D52 (N8 protein)                                                                                                                                                                                                             | TPD52_HUMAN | 19845 | 100% | 2 | 2 | 6  | 0.09% | 34.20% |
| FTC133-p17 | (P55327) Tumor protein D52 (N8 protein)                                                                                                                                                                                                             | TPD52_HUMAN | 19845 | 100% | 7 | 8 | 17 | 0.16% | 62.50% |
| FTC133-p17 | (P55327) Tumor protein D52 (N8 protein)                                                                                                                                                                                                             | TPD52_HUMAN | 19845 | 100% | 3 | 4 | 12 | 0.10% | 32.60% |
| FTC133-p17 | (P55327) Tumor protein D52 (N8 protein)                                                                                                                                                                                                             | TPD52_HUMAN | 19845 | 100% | 3 | 3 | 11 | 0.09% | 42.40% |
| FTC133-p17 | (P55327) Tumor protein D52 (N8 protein)                                                                                                                                                                                                             | TPD52_HUMAN | 19845 | 99%  | 2 | 2 | 2  | 0.02% | 34.20% |
| FTC133-p17 | (P60174) Triosephosphate isomerase (EC 5.3.1.1) (TIM) (Triose-phosphate isomerase)                                                                                                                                                                  | TPIS_HUMAN  | 26520 | 100% | 4 | 4 | 7  | 0.07% | 29.00% |
| FTC133-p17 | (P60174) Triosephosphate isomerase (EC 5.3.1.1) (TIM) (Triose-phosphate isomerase)                                                                                                                                                                  | TPIS_HUMAN  | 26520 | 100% | 6 | 6 | 12 | 0.11% | 28.60% |
| FTC133-p17 | (P60174) Triosephosphate isomerase (EC 5.3.1.1) (TIM) (Triose-phosphate isomerase)                                                                                                                                                                  | TPIS_HUMAN  | 26520 | 100% | 7 | 7 | 10 | 0.09% | 48.40% |

Protein Identified Sequence Coverage in FTC-133

|            |                                                                                                                                                                                                                                         |             |       |      |   |   |    |       |        |
|------------|-----------------------------------------------------------------------------------------------------------------------------------------------------------------------------------------------------------------------------------------|-------------|-------|------|---|---|----|-------|--------|
| FTC133-p17 | (P60174) Triosephosphate isomerase (EC 5.3.1.1) (TIM) (Triose-phosphate isomerase)                                                                                                                                                      | TPIS_HUMAN  | 26520 | 100% | 5 | 5 | 9  | 0.11% | 30.20% |
| FTC133-p17 | (P60174) Triosephosphate isomerase (EC 5.3.1.1) (TIM) (Triose-phosphate isomerase)                                                                                                                                                      | TPIS_HUMAN  | 26520 | 100% | 6 | 9 | 12 | 0.11% | 35.50% |
| FTC133-p17 | (P60174) Triosephosphate isomerase (EC 5.3.1.1) (TIM) (Triose-phosphate isomerase)                                                                                                                                                      | TPIS_HUMAN  | 26520 | 100% | 2 | 2 | 2  | 0.02% | 12.10% |
| FTC133-p17 | (P60174) Triosephosphate isomerase (EC 5.3.1.1) (TIM) (Triose-phosphate isomerase)                                                                                                                                                      | TPIS_HUMAN  | 26520 | 100% | 2 | 2 | 5  | 0.04% | 11.70% |
| FTC133-p17 | (P60660) Myosin light polypeptide 6 (Smooth muscle and nonmuscle myosin light chain alkali 6) (Myosin light chain alkali 3) (Myosin light chain 3) (MLC-3) (LC17)                                                                       | MYL6_HUMAN  | 16781 | 100% | 2 | 2 | 2  | 0.02% | 14.70% |
| FTC133-p17 | (P61019) Ras-related protein Rab-2A                                                                                                                                                                                                     | RAB2A_HUMAN | 23528 | 100% | 2 | 2 | 2  | 0.02% | 12.30% |
| FTC133-p17 | (P61088) Ubiquitin-conjugating enzyme E2 N (EC 6.3.2.19) (Ubiquitin-protein ligase N) (Ubiquitin carrier protein N) (Ubc13) (Bendless-like ubiquitin-conjugating enzyme)                                                                | UBE2N_HUMAN | 17121 | 100% | 2 | 2 | 2  | 0.02% | 17.10% |
| FTC133-p17 | (P61289) Proteasome activator complex subunit 3 (Proteasome activator 28-gamma subunit) (PA28gamma) (PA28g) (Activator of multicatalytic protease subunit 3) (11S regulator complex gamma subunit) (REG-gamma) (Ki nuclear autoantigen) | PSME3_HUMAN | 29489 | 100% | 3 | 4 | 6  | 0.06% | 13.80% |
| FTC133-p17 | (P61289) Proteasome activator complex subunit 3 (Proteasome activator 28-gamma subunit) (PA28gamma) (PA28g) (Activator of multicatalytic protease subunit 3) (11S regulator complex gamma subunit) (REG-gamma) (Ki nuclear autoantigen) | PSME3_HUMAN | 29489 | 100% | 4 | 5 | 8  | 0.07% | 19.70% |
| FTC133-p17 | (P61289) Proteasome activator complex subunit 3 (Proteasome activator 28-gamma subunit) (PA28gamma) (PA28g) (Activator of multicatalytic protease subunit 3) (11S regulator complex gamma subunit) (REG-gamma) (Ki nuclear autoantigen) | PSME3_HUMAN | 29489 | 100% | 4 | 4 | 5  | 0.06% | 20.10% |
| FTC133-p17 | (P61289) Proteasome activator complex subunit 3 (Proteasome activator 28-gamma subunit) (PA28gamma) (PA28g) (Activator of multicatalytic protease subunit 3) (11S regulator complex gamma subunit) (REG-gamma) (Ki nuclear autoantigen) | PSME3_HUMAN | 29489 | 100% | 2 | 2 | 5  | 0.05% | 9.45%  |
| FTC133-p17 | (P61289) Proteasome activator complex subunit 3 (Proteasome activator 28-gamma subunit) (PA28gamma) (PA28g) (Activator of multicatalytic protease subunit 3) (11S regulator complex gamma subunit) (REG-gamma) (Ki nuclear autoantigen) | PSME3_HUMAN | 29489 | 100% | 2 | 3 | 5  | 0.04% | 11.80% |
| FTC133-p17 | (P61916) Epididymal secretory protein E1 precursor (Niemann-Pick disease type C2 protein) (hE1)                                                                                                                                         | NPC2_HUMAN  | 16552 | 100% | 3 | 3 | 4  | 0.04% | 32.50% |
| FTC133-p17 | (P61916) Epididymal secretory protein E1 precursor (Niemann-Pick disease type C2 protein) (hE1)                                                                                                                                         | NPC2_HUMAN  | 16552 | 100% | 3 | 3 | 4  | 0.04% | 26.50% |
| FTC133-p17 | (P61916) Epididymal secretory protein E1 precursor (Niemann-Pick disease type C2 protein) (hE1)                                                                                                                                         | NPC2_HUMAN  | 16552 | 100% | 5 | 6 | 12 | 0.11% | 45.70% |



## Protein Identified Sequence Coverage in FTC-133

|            |                                                                                                                                                        |             |       |      |   |   |    |       |        |
|------------|--------------------------------------------------------------------------------------------------------------------------------------------------------|-------------|-------|------|---|---|----|-------|--------|
| FTC133-p17 | (P61916) Epididymal secretory protein E1 precursor (Niemann-Pick disease type C2 protein) (hE1)                                                        | NPC2_HUMAN  | 16552 | 100% | 2 | 2 | 3  | 0.05% | 16.60% |
| FTC133-p17 | (P61916) Epididymal secretory protein E1 precursor (Niemann-Pick disease type C2 protein) (hE1)                                                        | NPC2_HUMAN  | 16552 | 100% | 4 | 5 | 9  | 0.08% | 38.40% |
| FTC133-p17 | (P61916) Epididymal secretory protein E1 precursor (Niemann-Pick disease type C2 protein) (hE1)                                                        | NPC2_HUMAN  | 16552 | 100% | 2 | 2 | 2  | 0.02% | 22.50% |
| FTC133-p17 | (P61978) Heterogeneous nuclear ribonucleoprotein K (hnRNP K) (Transformation up-regulated nuclear protein) (TUNP)                                      | HNRPK_HUMAN | 50961 | 100% | 2 | 2 | 4  | 0.04% | 6.70%  |
| FTC133-p17 | (P61978) Heterogeneous nuclear ribonucleoprotein K (hnRNP K) (Transformation up-regulated nuclear protein) (TUNP)                                      | HNRPK_HUMAN | 50961 | 100% | 2 | 2 | 2  | 0.02% | 6.70%  |
| FTC133-p17 | (P62258) 14-3-3 protein epsilon (14-3-3E)                                                                                                              | 1433E_HUMAN | 29157 | 100% | 3 | 3 | 4  | 0.04% | 25.90% |
| FTC133-p17 | (P62258) 14-3-3 protein epsilon (14-3-3E)                                                                                                              | 1433E_HUMAN | 29157 | 100% | 2 | 2 | 2  | 0.02% | 21.20% |
| FTC133-p17 | (P62258) 14-3-3 protein epsilon (14-3-3E)                                                                                                              | 1433E_HUMAN | 29157 | 100% | 2 | 2 | 3  | 0.04% | 21.20% |
| FTC133-p17 | (P62258) 14-3-3 protein epsilon (14-3-3E)                                                                                                              | 1433E_HUMAN | 29157 | 100% | 2 | 2 | 3  | 0.03% | 19.60% |
| FTC133-p17 | (P62258) 14-3-3 protein epsilon (14-3-3E)                                                                                                              | 1433E_HUMAN | 29157 | 100% | 2 | 2 | 2  | 0.02% | 11.40% |
| FTC133-p17 | (P62805) Histone H4                                                                                                                                    | H4_HUMAN    | 11219 | 100% | 4 | 4 | 7  | 0.07% | 41.20% |
| FTC133-p17 | (P62805) Histone H4                                                                                                                                    | H4_HUMAN    | 11219 | 100% | 5 | 6 | 11 | 0.10% | 51.00% |
| FTC133-p17 | (P62805) Histone H4                                                                                                                                    | H4_HUMAN    | 11219 | 100% | 6 | 7 | 15 | 0.14% | 52.00% |
| FTC133-p17 | (P62805) Histone H4                                                                                                                                    | H4_HUMAN    | 11219 | 100% | 2 | 2 | 5  | 0.06% | 19.60% |
| FTC133-p17 | (P62805) Histone H4                                                                                                                                    | H4_HUMAN    | 11219 | 100% | 4 | 4 | 12 | 0.11% | 41.20% |
| FTC133-p17 | (P62888) 60S ribosomal protein L30                                                                                                                     | RL30_HUMAN  | 12636 | 100% | 2 | 2 | 3  | 0.03% | 24.60% |
| FTC133-p17 | (P62888) 60S ribosomal protein L30                                                                                                                     | RL30_HUMAN  | 12636 | 100% | 2 | 2 | 3  | 0.03% | 24.60% |
| FTC133-p17 | (P62937) Peptidyl-prolyl cis-trans isomerase A (EC 5.2.1.8) (PPlase A) (Rotamase A) (Cyclophilin A) (Cyclosporin A-binding protein)                    | PPIA_HUMAN  | 17864 | 100% | 3 | 3 | 3  | 0.03% | 22.00% |
| FTC133-p17 | (P62937) Peptidyl-prolyl cis-trans isomerase A (EC 5.2.1.8) (PPlase A) (Rotamase A) (Cyclophilin A) (Cyclosporin A-binding protein)                    | PPIA_HUMAN  | 17864 | 100% | 5 | 6 | 10 | 0.09% | 47.00% |
| FTC133-p17 | (P62937) Peptidyl-prolyl cis-trans isomerase A (EC 5.2.1.8) (PPlase A) (Rotamase A) (Cyclophilin A) (Cyclosporin A-binding protein)                    | PPIA_HUMAN  | 17864 | 100% | 6 | 6 | 9  | 0.08% | 53.70% |
| FTC133-p17 | (P62937) Peptidyl-prolyl cis-trans isomerase A (EC 5.2.1.8) (PPlase A) (Rotamase A) (Cyclophilin A) (Cyclosporin A-binding protein)                    | PPIA_HUMAN  | 17864 | 100% | 4 | 5 | 9  | 0.11% | 30.50% |
| FTC133-p17 | (P62937) Peptidyl-prolyl cis-trans isomerase A (EC 5.2.1.8) (PPlase A) (Rotamase A) (Cyclophilin A) (Cyclosporin A-binding protein)                    | PPIA_HUMAN  | 17864 | 100% | 4 | 5 | 11 | 0.10% | 30.50% |
| FTC133-p17 | (P62942) FK506-binding protein 1A (EC 5.2.1.8) (Peptidyl-prolyl cis-trans isomerase) (PPlase) (Rotamase) (12 kDa FKBP) (FKBP-12) (Immunophilin FKBP12) | FKB1A_HUMAN | 11802 | 100% | 2 | 2 | 2  | 0.02% | 25.20% |
| FTC133-p17 | (P62942) FK506-binding protein 1A (EC 5.2.1.8) (Peptidyl-prolyl cis-trans isomerase) (PPlase) (Rotamase) (12 kDa FKBP) (FKBP-12) (Immunophilin FKBP12) | FKB1A_HUMAN | 11802 | 100% | 2 | 2 | 2  | 0.02% | 25.20% |
| FTC133-p17 | (P62988) Ubiquitin                                                                                                                                     | UBIQ_HUMAN  | 8547  | 100% | 3 | 3 | 5  | 0.05% | 44.70% |
| FTC133-p17 | (P62988) Ubiquitin                                                                                                                                     | UBIQ_HUMAN  | 8547  | 100% | 3 | 3 | 6  | 0.06% | 44.70% |
| FTC133-p17 | (P62988) Ubiquitin                                                                                                                                     | UBIQ_HUMAN  | 8547  | 100% | 3 | 3 | 6  | 0.06% | 44.70% |
| FTC133-p17 | (P62988) Ubiquitin                                                                                                                                     | UBIQ_HUMAN  | 8547  | 100% | 2 | 2 | 3  | 0.04% | 32.90% |
| FTC133-p17 | (P62988) Ubiquitin                                                                                                                                     | UBIQ_HUMAN  | 8547  | 100% | 3 | 3 | 5  | 0.05% | 44.70% |
| FTC133-p17 | (P63104) 14-3-3 protein zeta/delta (Protein kinase C inhibitor protein 1) (KCIP-1)                                                                     | 1433Z_HUMAN | 27728 | 100% | 3 | 4 | 7  | 0.07% | 17.60% |

## Protein Identified Sequence Coverage in FTC-133

|            |                                                                                                                        |             |       |      |    |    |    |       |        |
|------------|------------------------------------------------------------------------------------------------------------------------|-------------|-------|------|----|----|----|-------|--------|
| FTC133-p17 | (P63104) 14-3-3 protein zeta/delta (Protein kinase C inhibitor protein 1) (KCIP-1)                                     | 1433Z_HUMAN | 27728 | 100% | 7  | 9  | 18 | 0.17% | 38.00% |
| FTC133-p17 | (P63104) 14-3-3 protein zeta/delta (Protein kinase C inhibitor protein 1) (KCIP-1)                                     | 1433Z_HUMAN | 27728 | 100% | 7  | 9  | 14 | 0.13% | 38.00% |
| FTC133-p17 | (P63104) 14-3-3 protein zeta/delta (Protein kinase C inhibitor protein 1) (KCIP-1)                                     | 1433Z_HUMAN | 27728 | 100% | 5  | 7  | 14 | 0.17% | 27.30% |
| FTC133-p17 | (P63104) 14-3-3 protein zeta/delta (Protein kinase C inhibitor protein 1) (KCIP-1)                                     | 1433Z_HUMAN | 27728 | 100% | 2  | 2  | 2  | 0.03% | 10.60% |
| FTC133-p17 | (P63104) 14-3-3 protein zeta/delta (Protein kinase C inhibitor protein 1) (KCIP-1)                                     | 1433Z_HUMAN | 27728 | 100% | 5  | 6  | 10 | 0.09% | 27.30% |
| FTC133-p17 | (P63104) 14-3-3 protein zeta/delta (Protein kinase C inhibitor protein 1) (KCIP-1)                                     | 1433Z_HUMAN | 27728 | 100% | 2  | 2  | 5  | 0.05% | 15.10% |
| FTC133-p17 | (P63104) 14-3-3 protein zeta/delta (Protein kinase C inhibitor protein 1) (KCIP-1)                                     | 1433Z_HUMAN | 27728 | 100% | 2  | 2  | 2  | 0.02% | 15.10% |
| FTC133-p17 | (P63104) 14-3-3 protein zeta/delta (Protein kinase C inhibitor protein 1) (KCIP-1)                                     | 1433Z_HUMAN | 27728 | 100% | 3  | 5  | 8  | 0.07% | 19.20% |
| FTC133-p17 | (P63261) Actin, cytoplasmic 2 (Gamma-actin)                                                                            | ACTG_HUMAN  | 41776 | 100% | 5  | 5  | 5  | 0.05% | 21.60% |
| FTC133-p17 | (P63261) Actin, cytoplasmic 2 (Gamma-actin)                                                                            | ACTG_HUMAN  | 41776 | 100% | 4  | 4  | 4  | 0.04% | 14.40% |
| FTC133-p17 | (P63261) Actin, cytoplasmic 2 (Gamma-actin)                                                                            | ACTG_HUMAN  | 41776 | 100% | 3  | 3  | 5  | 0.05% | 11.70% |
| FTC133-p17 | (P63261) Actin, cytoplasmic 2 (Gamma-actin)                                                                            | ACTG_HUMAN  | 41776 | 100% | 10 | 10 | 17 | 0.16% | 39.50% |
| FTC133-p17 | (P63261) Actin, cytoplasmic 2 (Gamma-actin)                                                                            | ACTG_HUMAN  | 41776 | 100% | 9  | 11 | 28 | 0.26% | 32.80% |
| FTC133-p17 | (P63261) Actin, cytoplasmic 2 (Gamma-actin)                                                                            | ACTG_HUMAN  | 41776 | 100% | 11 | 14 | 46 | 0.43% | 42.90% |
| FTC133-p17 | (P63261) Actin, cytoplasmic 2 (Gamma-actin)                                                                            | ACTG_HUMAN  | 41776 | 100% | 7  | 10 | 21 | 0.25% | 32.00% |
| FTC133-p17 | (P63261) Actin, cytoplasmic 2 (Gamma-actin)                                                                            | ACTG_HUMAN  | 41776 | 100% | 3  | 3  | 4  | 0.07% | 9.07%  |
| FTC133-p17 | (P63261) Actin, cytoplasmic 2 (Gamma-actin)                                                                            | ACTG_HUMAN  | 41776 | 100% | 4  | 4  | 9  | 0.14% | 20.00% |
| FTC133-p17 | (P63261) Actin, cytoplasmic 2 (Gamma-actin)                                                                            | ACTG_HUMAN  | 41776 | 100% | 11 | 14 | 44 | 0.42% | 45.60% |
| FTC133-p17 | (P63261) Actin, cytoplasmic 2 (Gamma-actin)                                                                            | ACTG_HUMAN  | 41776 | 100% | 2  | 2  | 6  | 0.06% | 11.70% |
| FTC133-p17 | (P63261) Actin, cytoplasmic 2 (Gamma-actin)                                                                            | ACTG_HUMAN  | 41776 | 100% | 4  | 5  | 7  | 0.06% | 15.50% |
| FTC133-p17 | (P63261) Actin, cytoplasmic 2 (Gamma-actin)                                                                            | ACTG_HUMAN  | 41776 | 100% | 3  | 4  | 7  | 0.06% | 16.00% |
| FTC133-p17 | (P67936) Tropomyosin alpha-4 chain (Tropomyosin-4) (TM30p1)                                                            | TPM4_HUMAN  | 28373 | 100% | 4  | 4  | 5  | 0.05% | 14.20% |
| FTC133-p17 | (P67936) Tropomyosin alpha-4 chain (Tropomyosin-4) (TM30p1)                                                            | TPM4_HUMAN  | 28373 | 100% | 3  | 3  | 3  | 0.03% | 13.80% |
| FTC133-p17 | (P67936) Tropomyosin alpha-4 chain (Tropomyosin-4) (TM30p1)                                                            | TPM4_HUMAN  | 28373 | 100% | 2  | 2  | 2  | 0.02% | 8.10%  |
| FTC133-p17 | (P68104) Elongation factor 1-alpha 1 (EF-1-alpha-1) (Elongation factor 1 A-1) (eEF1A-1) (Elongation factor Tu) (EF-Tu) | EF1A1_HUMAN | 50123 | 100% | 3  | 3  | 4  | 0.04% | 7.14%  |
| FTC133-p17 | (P68104) Elongation factor 1-alpha 1 (EF-1-alpha-1) (Elongation factor 1 A-1) (eEF1A-1) (Elongation factor Tu) (EF-Tu) | EF1A1_HUMAN | 50123 | 100% | 5  | 7  | 10 | 0.09% | 18.20% |
| FTC133-p17 | (P68104) Elongation factor 1-alpha 1 (EF-1-alpha-1) (Elongation factor 1 A-1) (eEF1A-1) (Elongation factor Tu) (EF-Tu) | EF1A1_HUMAN | 50123 | 100% | 7  | 8  | 13 | 0.12% | 22.70% |
| FTC133-p17 | (P68104) Elongation factor 1-alpha 1 (EF-1-alpha-1) (Elongation factor 1 A-1) (eEF1A-1) (Elongation factor Tu) (EF-Tu) | EF1A1_HUMAN | 50123 | 100% | 2  | 3  | 5  | 0.06% | 11.30% |
| FTC133-p17 | (P68104) Elongation factor 1-alpha 1 (EF-1-alpha-1) (Elongation factor 1 A-1) (eEF1A-1) (Elongation factor Tu) (EF-Tu) | EF1A1_HUMAN | 50123 | 100% | 7  | 7  | 10 | 0.09% | 23.60% |
| FTC133-p17 | (P68104) Elongation factor 1-alpha 1 (EF-1-alpha-1) (Elongation factor 1 A-1) (eEF1A-1) (Elongation factor Tu) (EF-Tu) | EF1A1_HUMAN | 50123 | 100% | 2  | 2  | 4  | 0.04% | 11.30% |
| FTC133-p17 | (P68104) Elongation factor 1-alpha 1 (EF-1-alpha-1) (Elongation factor 1 A-1) (eEF1A-1) (Elongation factor Tu) (EF-Tu) | EF1A1_HUMAN | 50123 | 99%  | 2  | 2  | 5  | 0.04% | 11.30% |

## Protein Identified Sequence Coverage in FTC-133

|            |                                                                                                                 |             |       |      |    |    |    |       |        |
|------------|-----------------------------------------------------------------------------------------------------------------|-------------|-------|------|----|----|----|-------|--------|
| FTC133-p17 | (P68133) Actin, alpha skeletal muscle (Alpha-actin-1)                                                           | ACTS_HUMAN  | 42034 | 100% | 2  | 2  | 3  | 0.03% | 21.00% |
| FTC133-p17 | (P68133) Actin, alpha skeletal muscle (Alpha-actin-1)                                                           | ACTS_HUMAN  | 42034 | 100% | 2  | 3  | 6  | 0.07% | 16.20% |
| FTC133-p17 | (P68363) Tubulin alpha-ubiquitous chain (Alpha-tubulin ubiquitous) (Tubulin K-alpha-1)                          | TBAK_HUMAN  | 50134 | 100% | 3  | 3  | 3  | 0.03% | 8.87%  |
| FTC133-p17 | (P68363) Tubulin alpha-ubiquitous chain (Alpha-tubulin ubiquitous) (Tubulin K-alpha-1)                          | TBAK_HUMAN  | 50134 | 100% | 9  | 9  | 14 | 0.13% | 31.00% |
| FTC133-p17 | (P68363) Tubulin alpha-ubiquitous chain (Alpha-tubulin ubiquitous) (Tubulin K-alpha-1)                          | TBAK_HUMAN  | 50134 | 100% | 10 | 10 | 17 | 0.16% | 33.70% |
| FTC133-p17 | (P68363) Tubulin alpha-ubiquitous chain (Alpha-tubulin ubiquitous) (Tubulin K-alpha-1)                          | TBAK_HUMAN  | 50134 | 100% | 10 | 10 | 17 | 0.20% | 34.40% |
| FTC133-p17 | (P68363) Tubulin alpha-ubiquitous chain (Alpha-tubulin ubiquitous) (Tubulin K-alpha-1)                          | TBAK_HUMAN  | 50134 | 100% | 2  | 2  | 4  | 0.06% | 9.98%  |
| FTC133-p17 | (P68363) Tubulin alpha-ubiquitous chain (Alpha-tubulin ubiquitous) (Tubulin K-alpha-1)                          | TBAK_HUMAN  | 50134 | 100% | 11 | 13 | 20 | 0.19% | 33.50% |
| FTC133-p17 | (P68363) Tubulin alpha-ubiquitous chain (Alpha-tubulin ubiquitous) (Tubulin K-alpha-1)                          | TBAK_HUMAN  | 50134 | 100% | 3  | 3  | 4  | 0.04% | 13.50% |
| FTC133-p17 | (P68363) Tubulin alpha-ubiquitous chain (Alpha-tubulin ubiquitous) (Tubulin K-alpha-1)                          | TBAK_HUMAN  | 50134 | 100% | 4  | 5  | 7  | 0.06% | 13.30% |
| FTC133-p17 | (P68371) Tubulin beta-2C chain (Tubulin beta-2 chain)                                                           | TBB2C_HUMAN | 49813 | 100% | 3  | 3  | 5  | 0.05% | 35.10% |
| FTC133-p17 | (P68371) Tubulin beta-2C chain (Tubulin beta-2 chain)                                                           | TBB2C_HUMAN | 49813 | 100% | 2  | 2  | 4  | 0.04% | 29.90% |
| FTC133-p17 | (P68371) Tubulin beta-2C chain (Tubulin beta-2 chain)                                                           | TBB2C_HUMAN | 49813 | 100% | 3  | 3  | 6  | 0.07% | 29.70% |
| FTC133-p17 | (P68371) Tubulin beta-2C chain (Tubulin beta-2 chain)                                                           | TBB2C_HUMAN | 49813 | 100% | 3  | 3  | 4  | 0.04% | 25.80% |
| FTC133-p17 | (P68431) Histone H3.1 (H3/a) (H3/b) (H3/c) (H3/d) (H3/f) (H3/h) (H3/i) (H3/j) (H3/k) (H3/l)                     | H31_HUMAN   | 15256 | 100% | 2  | 2  | 2  | 0.02% | 24.40% |
| FTC133-p17 | (P84085) ADP-ribosylation factor 5                                                                              | ARF5_HUMAN  | 20381 | 100% | 2  | 2  | 2  | 0.02% | 17.90% |
| FTC133-p17 | (Q01518) Adenylyl cyclase-associated protein 1 (CAP 1)                                                          | CAP1_HUMAN  | 51524 | 100% | 3  | 3  | 4  | 0.04% | 13.50% |
| FTC133-p17 | (Q01518) Adenylyl cyclase-associated protein 1 (CAP 1)                                                          | CAP1_HUMAN  | 51524 | 100% | 2  | 2  | 2  | 0.02% | 8.86%  |
| FTC133-p17 | (Q01518) Adenylyl cyclase-associated protein 1 (CAP 1)                                                          | CAP1_HUMAN  | 51524 | 100% | 2  | 2  | 2  | 0.02% | 6.54%  |
| FTC133-p17 | (Q01518) Adenylyl cyclase-associated protein 1 (CAP 1)                                                          | CAP1_HUMAN  | 51524 | 100% | 2  | 2  | 3  | 0.05% | 8.65%  |
| FTC133-p17 | (Q01518) Adenylyl cyclase-associated protein 1 (CAP 1)                                                          | CAP1_HUMAN  | 51524 | 100% | 2  | 2  | 2  | 0.02% | 9.07%  |
| FTC133-p17 | (Q02809) Procollagen-lysine,2-oxoglutarate 5-dioxygenase 1 precursor (EC 1.14.11.4) (Lysyl hydroxylase 1) (LH1) | PLOD1_HUMAN | 83535 | 100% | 3  | 3  | 4  | 0.04% | 5.50%  |
| FTC133-p17 | (Q02809) Procollagen-lysine,2-oxoglutarate 5-dioxygenase 1 precursor (EC 1.14.11.4) (Lysyl hydroxylase 1) (LH1) | PLOD1_HUMAN | 83535 | 100% | 4  | 4  | 4  | 0.05% | 8.12%  |
| FTC133-p17 | (Q02809) Procollagen-lysine,2-oxoglutarate 5-dioxygenase 1 precursor (EC 1.14.11.4) (Lysyl hydroxylase 1) (LH1) | PLOD1_HUMAN | 83535 | 100% | 2  | 2  | 2  | 0.02% | 4.26%  |
| FTC133-p17 | (Q02809) Procollagen-lysine,2-oxoglutarate 5-dioxygenase 1 precursor (EC 1.14.11.4) (Lysyl hydroxylase 1) (LH1) | PLOD1_HUMAN | 83535 | 100% | 4  | 4  | 6  | 0.05% | 8.12%  |
| FTC133-p17 | (Q02809) Procollagen-lysine,2-oxoglutarate 5-dioxygenase 1 precursor (EC 1.14.11.4) (Lysyl hydroxylase 1) (LH1) | PLOD1_HUMAN | 83535 | 99%  | 2  | 2  | 3  | 0.03% | 5.50%  |

Protein Identified Sequence Coverage in FTC-133

|            |                                                                                                                                                                                                                                                     |             |       |      |    |    |    |       |        |
|------------|-----------------------------------------------------------------------------------------------------------------------------------------------------------------------------------------------------------------------------------------------------|-------------|-------|------|----|----|----|-------|--------|
| FTC133-p17 | (Q05639) Elongation factor 1-alpha 2 (EF-1-alpha-2) (Elongation factor 1 A-2) (eEF1A-2) (Statin S1)                                                                                                                                                 | EF1A2_HUMAN | 50453 | 100% | 2  | 2  | 2  | 0.02% | 7.78%  |
| FTC133-p17 | (Q06323) Proteasome activator complex subunit 1 (Proteasome activator 28-alpha subunit) (PA28alpha) (PA28a) (Activator of multicatalytic protease subunit 1) (11S regulator complex alpha subunit) (REG-alpha) (Interferon gamma up-regulated I-51) | PSME1_HUMAN | 28706 | 100% | 7  | 7  | 10 | 0.10% | 30.90% |
| FTC133-p17 | (Q06323) Proteasome activator complex subunit 1 (Proteasome activator 28-alpha subunit) (PA28alpha) (PA28a) (Activator of multicatalytic protease subunit 1) (11S regulator complex alpha subunit) (REG-alpha) (Interferon gamma up-regulated I-51) | PSME1_HUMAN | 28706 | 100% | 10 | 10 | 17 | 0.16% | 43.80% |
| FTC133-p17 | (Q06323) Proteasome activator complex subunit 1 (Proteasome activator 28-alpha subunit) (PA28alpha) (PA28a) (Activator of multicatalytic protease subunit 1) (11S regulator complex alpha subunit) (REG-alpha) (Interferon gamma up-regulated I-51) | PSME1_HUMAN | 28706 | 100% | 9  | 9  | 11 | 0.10% | 42.60% |
| FTC133-p17 | (Q06323) Proteasome activator complex subunit 1 (Proteasome activator 28-alpha subunit) (PA28alpha) (PA28a) (Activator of multicatalytic protease subunit 1) (11S regulator complex alpha subunit) (REG-alpha) (Interferon gamma up-regulated I-51) | PSME1_HUMAN | 28706 | 100% | 8  | 8  | 12 | 0.14% | 28.10% |
| FTC133-p17 | (Q06323) Proteasome activator complex subunit 1 (Proteasome activator 28-alpha subunit) (PA28alpha) (PA28a) (Activator of multicatalytic protease subunit 1) (11S regulator complex alpha subunit) (REG-alpha) (Interferon gamma up-regulated I-51) | PSME1_HUMAN | 28706 | 100% | 10 | 10 | 15 | 0.14% | 41.80% |
| FTC133-p17 | (Q06323) Proteasome activator complex subunit 1 (Proteasome activator 28-alpha subunit) (PA28alpha) (PA28a) (Activator of multicatalytic protease subunit 1) (11S regulator complex alpha subunit) (REG-alpha) (Interferon gamma up-regulated I-51) | PSME1_HUMAN | 28706 | 100% | 2  | 2  | 3  | 0.03% | 7.63%  |
| FTC133-p17 | (Q06830) Peroxiredoxin-1 (EC 1.11.1.15) (Thioredoxin peroxidase 2) (Thioredoxin-dependent peroxide reductase 2) (Proliferation-associated protein PAG) (Natural killer cell-enhancing factor A) (NKEF-A)                                            | PRDX1_HUMAN | 22093 | 100% | 4  | 4  | 8  | 0.08% | 19.60% |
| FTC133-p17 | (Q06830) Peroxiredoxin-1 (EC 1.11.1.15) (Thioredoxin peroxidase 2) (Thioredoxin-dependent peroxide reductase 2) (Proliferation-associated protein PAG) (Natural killer cell-enhancing factor A) (NKEF-A)                                            | PRDX1_HUMAN | 22093 | 100% | 6  | 7  | 11 | 0.10% | 28.60% |
| FTC133-p17 | (Q06830) Peroxiredoxin-1 (EC 1.11.1.15) (Thioredoxin peroxidase 2) (Thioredoxin-dependent peroxide reductase 2) (Proliferation-associated protein PAG) (Natural killer cell-enhancing factor A) (NKEF-A)                                            | PRDX1_HUMAN | 22093 | 100% | 7  | 7  | 14 | 0.13% | 44.20% |

## Protein Identified Sequence Coverage in FTC-133

|            |                                                                                                                                                                                                                                      |                |        |      |    |    |    |       |        |
|------------|--------------------------------------------------------------------------------------------------------------------------------------------------------------------------------------------------------------------------------------|----------------|--------|------|----|----|----|-------|--------|
| FTC133-p17 | (Q06830) Peroxiredoxin-1 (EC 1.11.1.15)<br>(Thioredoxin peroxidase 2) (Thioredoxin-dependent peroxide reductase 2) (Proliferation-associated protein PAG) (Natural killer cell-enhancing factor A) (NKEF-A)                          | PRDX1_HUMAN    | 22093  | 100% | 4  | 4  | 10 | 0.12% | 19.10% |
| FTC133-p17 | (Q06830) Peroxiredoxin-1 (EC 1.11.1.15)<br>(Thioredoxin peroxidase 2) (Thioredoxin-dependent peroxide reductase 2) (Proliferation-associated protein PAG) (Natural killer cell-enhancing factor A) (NKEF-A)                          | PRDX1_HUMAN    | 22093  | 100% | 7  | 8  | 14 | 0.13% | 32.20% |
| FTC133-p17 | (Q07020) 60S ribosomal protein L18                                                                                                                                                                                                   | RL18_HUMAN     | 21486  | 100% | 2  | 2  | 2  | 0.02% | 13.90% |
| FTC133-p17 | (Q07812) Apoptosis regulator BAX, membrane isoform alpha                                                                                                                                                                             | BAXA_HUMAN,BAX | 21167  | 100% | 4  | 4  | 6  | 0.06% | 29.70% |
| FTC133-p17 | (Q07812) Apoptosis regulator BAX, membrane isoform alpha                                                                                                                                                                             | BAXA_HUMAN,BAX | 24203  | 100% | 2  | 2  | 4  | 0.04% | 11.00% |
| FTC133-p17 | (Q07812) Apoptosis regulator BAX, membrane isoform alpha                                                                                                                                                                             | BAXA_HUMAN,BAX | 21167  | 100% | 2  | 2  | 2  | 0.02% | 17.20% |
| FTC133-p17 | (Q07812) Apoptosis regulator BAX, membrane isoform alpha                                                                                                                                                                             | BAXA_HUMAN,BAX | 21167  | 100% | 2  | 2  | 3  | 0.05% | 12.50% |
| FTC133-p17 | (Q09666) Neuroblast differentiation-associated protein AHNAK (Desmoyokin) (Fragments)                                                                                                                                                | AHNK_HUMAN     | 312479 | 100% | 9  | 9  | 18 | 0.17% | 4.63%  |
| FTC133-p17 | (Q09666) Neuroblast differentiation-associated protein AHNAK (Desmoyokin) (Fragments)                                                                                                                                                | AHNK_HUMAN     | 312479 | 100% | 14 | 14 | 20 | 0.19% | 5.88%  |
| FTC133-p17 | (Q09666) Neuroblast differentiation-associated protein AHNAK (Desmoyokin) (Fragments)                                                                                                                                                | AHNK_HUMAN     | 312479 | 100% | 7  | 7  | 12 | 0.14% | 3.11%  |
| FTC133-p17 | (Q09666) Neuroblast differentiation-associated protein AHNAK (Desmoyokin) (Fragments)                                                                                                                                                | AHNK_HUMAN     | 312479 | 100% | 2  | 2  | 2  | 0.03% | 0.64%  |
| FTC133-p17 | (Q09666) Neuroblast differentiation-associated protein AHNAK (Desmoyokin) (Fragments)                                                                                                                                                | AHNK_HUMAN     | 312479 | 100% | 4  | 4  | 5  | 0.08% | 3.34%  |
| FTC133-p17 | (Q09666) Neuroblast differentiation-associated protein AHNAK (Desmoyokin) (Fragments)                                                                                                                                                | AHNK_HUMAN     | 312479 | 100% | 12 | 13 | 19 | 0.18% | 5.37%  |
| FTC133-p17 | (Q09666) Neuroblast differentiation-associated protein AHNAK (Desmoyokin) (Fragments)                                                                                                                                                | AHNK_HUMAN     | 312479 | 100% | 3  | 3  | 3  | 0.03% | 1.39%  |
| FTC133-p17 | (Q09666) Neuroblast differentiation-associated protein AHNAK (Desmoyokin) (Fragments)                                                                                                                                                | AHNK_HUMAN     | 312479 | 100% | 2  | 2  | 2  | 0.02% | 1.35%  |
| FTC133-p17 | (Q09666) Neuroblast differentiation-associated protein AHNAK (Desmoyokin) (Fragments)                                                                                                                                                | AHNK_HUMAN     | 312479 | 100% | 2  | 2  | 2  | 0.02% | 1.69%  |
| FTC133-p17 | (Q09666) Neuroblast differentiation-associated protein AHNAK (Desmoyokin) (Fragments)                                                                                                                                                | AHNK_HUMAN     | 312479 | 100% | 3  | 3  | 4  | 0.03% | 2.30%  |
| FTC133-p17 | (Q13449) Limbic system-associated membrane protein precursor (LSAMP)                                                                                                                                                                 | LSAMP_HUMAN    | 37290  | 100% | 2  | 2  | 3  | 0.03% | 8.58%  |
| FTC133-p17 | (Q13509) Tubulin beta-3 chain (Tubulin beta-III) (Tubulin beta-4)                                                                                                                                                                    | TBB3_HUMAN     | 50415  | 99%  | 2  | 2  | 2  | 0.02% | 15.60% |
| FTC133-p17 | (Q13510) Acid ceramidase precursor (EC 3.5.1.23) (Acylsphingosine deacylase) (N-acylsphingosine amidohydrolase) (AC) (Putative 32 kDa heart protein) (PHP32) [Contains: Acid ceramidase alpha subunit; Acid ceramidase beta subunit] | ASAH1_HUMAN    | 44633  | 100% | 2  | 2  | 2  | 0.02% | 6.84%  |
| FTC133-p17 | (Q13510) Acid ceramidase precursor (EC 3.5.1.23) (Acylsphingosine deacylase) (N-acylsphingosine amidohydrolase) (AC) (Putative 32 kDa heart protein) (PHP32) [Contains: Acid ceramidase alpha subunit; Acid ceramidase beta subunit] | ASAH1_HUMAN    | 44633  | 100% | 2  | 2  | 2  | 0.02% | 6.84%  |

## Protein Identified Sequence Coverage in FTC-133

|            |                                                                                                                                                                                                                                      |             |       |      |    |    |    |       |        |
|------------|--------------------------------------------------------------------------------------------------------------------------------------------------------------------------------------------------------------------------------------|-------------|-------|------|----|----|----|-------|--------|
| FTC133-p17 | (Q13510) Acid ceramidase precursor (EC 3.5.1.23) (Acylsphingosine deacylase) (N-acylsphingosine amidohydrolase) (AC) (Putative 32 kDa heart protein) (PHP32) [Contains: Acid ceramidase alpha subunit; Acid ceramidase beta subunit] | ASAH1_HUMAN | 44633 | 100% | 2  | 2  | 3  | 0.03% | 6.84%  |
| FTC133-p17 | (Q13510) Acid ceramidase precursor (EC 3.5.1.23) (Acylsphingosine deacylase) (N-acylsphingosine amidohydrolase) (AC) (Putative 32 kDa heart protein) (PHP32) [Contains: Acid ceramidase alpha subunit; Acid ceramidase beta subunit] | ASAH1_HUMAN | 44633 | 100% | 2  | 2  | 3  | 0.03% | 7.34%  |
| FTC133-p17 | (Q13510) Acid ceramidase precursor (EC 3.5.1.23) (Acylsphingosine deacylase) (N-acylsphingosine amidohydrolase) (AC) (Putative 32 kDa heart protein) (PHP32) [Contains: Acid ceramidase alpha subunit; Acid ceramidase beta subunit] | ASAH1_HUMAN | 44633 | 100% | 2  | 2  | 3  | 0.03% | 9.37%  |
| FTC133-p17 | (Q13561) Dynactin subunit 2 (Dynactin complex 50 kDa subunit) (50 kDa dynein-associated polypeptide) (p50 dynamitin) (DCTN-50)                                                                                                       | DCTN2_HUMAN | 44083 | 100% | 3  | 3  | 4  | 0.04% | 15.50% |
| FTC133-p17 | (Q13561) Dynactin subunit 2 (Dynactin complex 50 kDa subunit) (50 kDa dynein-associated polypeptide) (p50 dynamitin) (DCTN-50)                                                                                                       | DCTN2_HUMAN | 44083 | 100% | 8  | 8  | 14 | 0.13% | 28.20% |
| FTC133-p17 | (Q13561) Dynactin subunit 2 (Dynactin complex 50 kDa subunit) (50 kDa dynein-associated polypeptide) (p50 dynamitin) (DCTN-50)                                                                                                       | DCTN2_HUMAN | 44083 | 100% | 10 | 10 | 14 | 0.13% | 37.00% |
| FTC133-p17 | (Q13561) Dynactin subunit 2 (Dynactin complex 50 kDa subunit) (50 kDa dynein-associated polypeptide) (p50 dynamitin) (DCTN-50)                                                                                                       | DCTN2_HUMAN | 44083 | 100% | 5  | 5  | 9  | 0.11% | 19.50% |
| FTC133-p17 | (Q13561) Dynactin subunit 2 (Dynactin complex 50 kDa subunit) (50 kDa dynein-associated polypeptide) (p50 dynamitin) (DCTN-50)                                                                                                       | DCTN2_HUMAN | 44083 | 100% | 2  | 2  | 3  | 0.05% | 4.75%  |
| FTC133-p17 | (Q13561) Dynactin subunit 2 (Dynactin complex 50 kDa subunit) (50 kDa dynein-associated polypeptide) (p50 dynamitin) (DCTN-50)                                                                                                       | DCTN2_HUMAN | 44083 | 100% | 9  | 9  | 11 | 0.10% | 33.00% |
| FTC133-p17 | (Q13561) Dynactin subunit 2 (Dynactin complex 50 kDa subunit) (50 kDa dynein-associated polypeptide) (p50 dynamitin) (DCTN-50)                                                                                                       | DCTN2_HUMAN | 44083 | 100% | 2  | 2  | 4  | 0.03% | 8.50%  |
| FTC133-p17 | (Q14103) Heterogeneous nuclear ribonucleoprotein D0 (hnRNP D0) (AU-rich element RNA-binding protein 1)                                                                                                                               | HNRPD_HUMAN | 38417 | 100% | 3  | 3  | 4  | 0.04% | 12.70% |
| FTC133-p17 | (Q14103) Heterogeneous nuclear ribonucleoprotein D0 (hnRNP D0) (AU-rich element RNA-binding protein 1)                                                                                                                               | HNRPD_HUMAN | 38417 | 100% | 3  | 3  | 3  | 0.03% | 12.70% |
| FTC133-p17 | (Q14764) Major vault protein (MVP) (Lung resistance-related protein)                                                                                                                                                                 | MVP_HUMAN   | 99177 | 100% | 5  | 5  | 7  | 0.07% | 8.97%  |
| FTC133-p17 | (Q14764) Major vault protein (MVP) (Lung resistance-related protein)                                                                                                                                                                 | MVP_HUMAN   | 99177 | 100% | 3  | 3  | 3  | 0.04% | 9.08%  |
| FTC133-p17 | (Q14764) Major vault protein (MVP) (Lung resistance-related protein)                                                                                                                                                                 | MVP_HUMAN   | 99177 | 100% | 3  | 3  | 3  | 0.03% | 8.52%  |
| FTC133-p17 | (Q14764) Major vault protein (MVP) (Lung resistance-related protein)                                                                                                                                                                 | MVP_HUMAN   | 99177 | 100% | 2  | 2  | 3  | 0.03% | 3.48%  |
| FTC133-p17 | (Q14974) Importin beta-1 subunit (Karyopherin beta-1 subunit) (Nuclear factor P97) (Importin 90)                                                                                                                                     | IMB1_HUMAN  | 97153 | 100% | 2  | 2  | 2  | 0.02% | 5.82%  |

## Protein Identified Sequence Coverage in FTC-133

|            |                                                                                                                                                                                                                             |                 |        |      |   |   |    |       |        |
|------------|-----------------------------------------------------------------------------------------------------------------------------------------------------------------------------------------------------------------------------|-----------------|--------|------|---|---|----|-------|--------|
| FTC133-p17 | (Q15084) Protein disulfide-isomerase A6 precursor (EC 5.3.4.1) (Protein disulfide isomerase P5) (Thioredoxin domain-containing protein 7)                                                                                   | PDIA6_HUMAN     | 48104  | 100% | 2 | 2 | 3  | 0.03% | 6.82%  |
| FTC133-p17 | (Q15084) Protein disulfide-isomerase A6 precursor (EC 5.3.4.1) (Protein disulfide isomerase P5) (Thioredoxin domain-containing protein 7)                                                                                   | PDIA6_HUMAN     | 48104  | 100% | 5 | 5 | 9  | 0.08% | 16.60% |
| FTC133-p17 | (Q15084) Protein disulfide-isomerase A6 precursor (EC 5.3.4.1) (Protein disulfide isomerase P5) (Thioredoxin domain-containing protein 7)                                                                                   | PDIA6_HUMAN     | 48104  | 100% | 5 | 5 | 9  | 0.08% | 16.60% |
| FTC133-p17 | (Q15084) Protein disulfide-isomerase A6 precursor (EC 5.3.4.1) (Protein disulfide isomerase P5) (Thioredoxin domain-containing protein 7)                                                                                   | PDIA6_HUMAN     | 48104  | 100% | 7 | 7 | 10 | 0.12% | 24.10% |
| FTC133-p17 | (Q15084) Protein disulfide-isomerase A6 precursor (EC 5.3.4.1) (Protein disulfide isomerase P5) (Thioredoxin domain-containing protein 7)                                                                                   | PDIA6_HUMAN     | 48104  | 100% | 6 | 7 | 11 | 0.10% | 18.60% |
| FTC133-p17 | (Q15181) Inorganic pyrophosphatase (EC 3.6.1.1) (Pyrophosphate phospho-hydrolase) (PPase)                                                                                                                                   | IPYR_HUMAN      | 32643  | 100% | 2 | 2 | 2  | 0.02% | 10.70% |
| FTC133-p17 | (Q15233) Non-POU domain-containing octamer-binding protein (NonO protein) (54 kDa nuclear RNA- and DNA-binding protein) (p54(nrb)) (p54nrb) (55 kDa nuclear protein) (NMT55) (DNA-binding p52/p100 complex, 52 kDa subunit) | NONO_HUMAN      | 54214  | 100% | 2 | 2 | 2  | 0.02% | 6.58%  |
| FTC133-p17 | (Q15417) Calponin-3 (Calponin, acidic isoform)                                                                                                                                                                              | CNN3_HUMAN      | 36397  | 100% | 4 | 4 | 4  | 0.04% | 21.90% |
| FTC133-p17 | (Q15417) Calponin-3 (Calponin, acidic isoform)                                                                                                                                                                              | CNN3_HUMAN      | 36397  | 100% | 2 | 2 | 3  | 0.03% | 11.90% |
| FTC133-p17 | (Q6EMK4) Vasorin precursor (Protein Slit-like 2)                                                                                                                                                                            | VASN_HUMAN      | 71696  | 100% | 2 | 2 | 2  | 0.02% | 4.61%  |
| FTC133-p17 | (Q6F113) Histone H2A type 2-A (H2A.2)                                                                                                                                                                                       | H2A2A_HUMAN,H2A | 13947  | 100% | 2 | 3 | 9  | 0.08% | 44.20% |
| FTC133-p17 | (Q6F113) Histone H2A type 2-A (H2A.2)                                                                                                                                                                                       | H2A2A_HUMAN,H2A | 13840  | 100% | 2 | 2 | 6  | 0.05% | 37.50% |
| FTC133-p17 | (Q6F113) Histone H2A type 2-A (H2A.2)                                                                                                                                                                                       | H2A2A_HUMAN,H2A | 13947  | 99%  | 2 | 2 | 3  | 0.03% | 37.20% |
| FTC133-p17 | (Q6F113) Histone H2A type 2-A (H2A.2)                                                                                                                                                                                       | H2A2A_HUMAN,H2A | 13840  | 100% | 2 | 2 | 3  | 0.03% | 37.50% |
| FTC133-p17 | (Q6NZI2) Polymerase I and transcript release factor (PTRF protein)                                                                                                                                                          | PTRF_HUMAN      | 43459  | 100% | 2 | 2 | 2  | 0.02% | 6.67%  |
| FTC133-p17 | (Q6NZI2) Polymerase I and transcript release factor (PTRF protein)                                                                                                                                                          | PTRF_HUMAN      | 43459  | 100% | 2 | 2 | 2  | 0.02% | 7.44%  |
| FTC133-p17 | (Q6UVK1) Chondroitin sulfate proteoglycan 4 precursor (Chondroitin sulfate proteoglycan NG2) (Melanoma chondroitin sulfate proteoglycan) (Melanoma-associated chondroitin sulfate proteoglycan)                             | CSPG4_HUMAN     | 250476 | 100% | 2 | 2 | 3  | 0.03% | 1.85%  |
| FTC133-p17 | (Q6UVK1) Chondroitin sulfate proteoglycan 4 precursor (Chondroitin sulfate proteoglycan NG2) (Melanoma chondroitin sulfate proteoglycan) (Melanoma-associated chondroitin sulfate proteoglycan)                             | CSPG4_HUMAN     | 250476 | 100% | 2 | 2 | 2  | 0.02% | 1.85%  |
| FTC133-p17 | (Q6UVK1) Chondroitin sulfate proteoglycan 4 precursor (Chondroitin sulfate proteoglycan NG2) (Melanoma chondroitin sulfate proteoglycan) (Melanoma-associated chondroitin sulfate proteoglycan)                             | CSPG4_HUMAN     | 250476 | 100% | 6 | 6 | 8  | 0.08% | 3.23%  |

## Protein Identified Sequence Coverage in FTC-133

|            |                                                                                                                                                                                                 |             |        |      |    |    |    |       |        |
|------------|-------------------------------------------------------------------------------------------------------------------------------------------------------------------------------------------------|-------------|--------|------|----|----|----|-------|--------|
| FTC133-p17 | (Q6UVK1) Chondroitin sulfate proteoglycan 4 precursor (Chondroitin sulfate proteoglycan NG2) (Melanoma chondroitin sulfate proteoglycan) (Melanoma-associated chondroitin sulfate proteoglycan) | CSPG4_HUMAN | 250476 | 100% | 23 | 25 | 34 | 0.32% | 14.70% |
| FTC133-p17 | (Q6UVK1) Chondroitin sulfate proteoglycan 4 precursor (Chondroitin sulfate proteoglycan NG2) (Melanoma chondroitin sulfate proteoglycan) (Melanoma-associated chondroitin sulfate proteoglycan) | CSPG4_HUMAN | 250476 | 100% | 22 | 22 | 26 | 0.24% | 13.70% |
| FTC133-p17 | (Q6UVK1) Chondroitin sulfate proteoglycan 4 precursor (Chondroitin sulfate proteoglycan NG2) (Melanoma chondroitin sulfate proteoglycan) (Melanoma-associated chondroitin sulfate proteoglycan) | CSPG4_HUMAN | 250476 | 100% | 12 | 14 | 15 | 0.18% | 6.89%  |
| FTC133-p17 | (Q6UVK1) Chondroitin sulfate proteoglycan 4 precursor (Chondroitin sulfate proteoglycan NG2) (Melanoma chondroitin sulfate proteoglycan) (Melanoma-associated chondroitin sulfate proteoglycan) | CSPG4_HUMAN | 250476 | 100% | 3  | 3  | 3  | 0.05% | 1.72%  |
| FTC133-p17 | (Q6UVK1) Chondroitin sulfate proteoglycan 4 precursor (Chondroitin sulfate proteoglycan NG2) (Melanoma chondroitin sulfate proteoglycan) (Melanoma-associated chondroitin sulfate proteoglycan) | CSPG4_HUMAN | 250476 | 100% | 8  | 8  | 9  | 0.14% | 7.41%  |
| FTC133-p17 | (Q6UVK1) Chondroitin sulfate proteoglycan 4 precursor (Chondroitin sulfate proteoglycan NG2) (Melanoma chondroitin sulfate proteoglycan) (Melanoma-associated chondroitin sulfate proteoglycan) | CSPG4_HUMAN | 250476 | 100% | 17 | 18 | 21 | 0.20% | 10.30% |
| FTC133-p17 | (Q6UVK1) Chondroitin sulfate proteoglycan 4 precursor (Chondroitin sulfate proteoglycan NG2) (Melanoma chondroitin sulfate proteoglycan) (Melanoma-associated chondroitin sulfate proteoglycan) | CSPG4_HUMAN | 250476 | 100% | 4  | 4  | 6  | 0.06% | 3.75%  |
| FTC133-p17 | (Q6UVK1) Chondroitin sulfate proteoglycan 4 precursor (Chondroitin sulfate proteoglycan NG2) (Melanoma chondroitin sulfate proteoglycan) (Melanoma-associated chondroitin sulfate proteoglycan) | CSPG4_HUMAN | 250476 | 100% | 5  | 5  | 6  | 0.05% | 4.09%  |
| FTC133-p17 | (Q8IYB3) Serine/arginine repetitive matrix protein 1 (Ser/Arg-related nuclear matrix protein) (SR-related nuclear matrix protein of 160 kDa) (SRm160)                                           | SRRM1_HUMAN | 102319 | 100% | 2  | 2  | 2  | 0.02% | 4.54%  |
| FTC133-p17 | (Q8IYB3) Serine/arginine repetitive matrix protein 1 (Ser/Arg-related nuclear matrix protein) (SR-related nuclear matrix protein of 160 kDa) (SRm160)                                           | SRRM1_HUMAN | 102319 | 100% | 2  | 2  | 2  | 0.02% | 5.42%  |
| FTC133-p17 | (Q8NCC3) 1-O-acylceramide synthase precursor (EC 2.3.1.-) (ACS) (Lysosomal phospholipase A2) (Lysophospholipase 3) (LPLA2) (LCAT-like lysophospholipase) (LLPL)                                 | LYPA3_HUMAN | 46641  | 100% | 2  | 2  | 3  | 0.03% | 10.20% |
| FTC133-p17 | (Q92820) Gamma-glutamyl hydrolase precursor (EC 3.4.19.9) (Gamma-Glu-X carboxypeptidase) (Conjugase) (GH)                                                                                       | GGH_HUMAN   | 35948  | 100% | 2  | 2  | 4  | 0.04% | 7.86%  |



## Protein Identified Sequence Coverage in FTC-133

|            |                                                                                                                                                                                  |             |       |      |    |    |    |       |        |
|------------|----------------------------------------------------------------------------------------------------------------------------------------------------------------------------------|-------------|-------|------|----|----|----|-------|--------|
| FTC133-p17 | (Q92820) Gamma-glutamyl hydrolase precursor (EC 3.4.19.9) (Gamma-Glu-X carboxypeptidase) (Conjugase) (GH)                                                                        | GGH_HUMAN   | 35948 | 100% | 5  | 5  | 5  | 0.05% | 23.30% |
| FTC133-p17 | (Q92820) Gamma-glutamyl hydrolase precursor (EC 3.4.19.9) (Gamma-Glu-X carboxypeptidase) (Conjugase) (GH)                                                                        | GGH_HUMAN   | 35948 | 100% | 3  | 3  | 3  | 0.04% | 12.30% |
| FTC133-p17 | (Q92820) Gamma-glutamyl hydrolase precursor (EC 3.4.19.9) (Gamma-Glu-X carboxypeptidase) (Conjugase) (GH)                                                                        | GGH_HUMAN   | 35948 | 100% | 3  | 4  | 4  | 0.04% | 12.30% |
| FTC133-p17 | (Q92820) Gamma-glutamyl hydrolase precursor (EC 3.4.19.9) (Gamma-Glu-X carboxypeptidase) (Conjugase) (GH)                                                                        | GGH_HUMAN   | 35948 | 100% | 2  | 2  | 2  | 0.02% | 9.12%  |
| FTC133-p17 | (Q93079) Histone H2B.j (H2B/j)                                                                                                                                                   | H2BJ_HUMAN  | 13743 | 100% | 3  | 3  | 9  | 0.09% | 28.00% |
| FTC133-p17 | (Q93079) Histone H2B.j (H2B/j)                                                                                                                                                   | H2BJ_HUMAN  | 13743 | 100% | 3  | 3  | 13 | 0.12% | 27.20% |
| FTC133-p17 | (Q93079) Histone H2B.j (H2B/j)                                                                                                                                                   | H2BJ_HUMAN  | 13743 | 100% | 3  | 3  | 20 | 0.19% | 27.20% |
| FTC133-p17 | (Q93079) Histone H2B.j (H2B/j)                                                                                                                                                   | H2BJ_HUMAN  | 13743 | 100% | 2  | 2  | 17 | 0.20% | 19.20% |
| FTC133-p17 | (Q93079) Histone H2B.j (H2B/j)                                                                                                                                                   | H2BJ_HUMAN  | 13743 | 100% | 2  | 2  | 3  | 0.05% | 16.80% |
| FTC133-p17 | (Q93079) Histone H2B.j (H2B/j)                                                                                                                                                   | H2BJ_HUMAN  | 13743 | 100% | 3  | 3  | 18 | 0.17% | 27.20% |
| FTC133-p17 | (Q93079) Histone H2B.j (H2B/j)                                                                                                                                                   | H2BJ_HUMAN  | 13743 | 100% | 2  | 2  | 12 | 0.10% | 19.20% |
| FTC133-p17 | (Q96AY3) FK506-binding protein 10 precursor (EC 5.2.1.8) (Peptidyl-prolyl cis-trans isomerase) (PP1ase) (Rotamase) (65 kDa FK506-binding protein) (FKBP65) (Immunophilin FKBP65) | FKB10_HUMAN | 64228 | 100% | 2  | 2  | 3  | 0.03% | 4.47%  |
| FTC133-p17 | (Q96HE7) ERO1-like protein alpha precursor (EC 1.8.4.-) (ERO1-Lalpha) (Oxidoreductin-1-Lalpha) (Endoplasmic oxidoreductin-1-like protein) (ERO1-L)                               | ERO1A_HUMAN | 54377 | 100% | 8  | 8  | 11 | 0.11% | 24.40% |
| FTC133-p17 | (Q96HE7) ERO1-like protein alpha precursor (EC 1.8.4.-) (ERO1-Lalpha) (Oxidoreductin-1-Lalpha) (Endoplasmic oxidoreductin-1-like protein) (ERO1-L)                               | ERO1A_HUMAN | 54377 | 100% | 10 | 10 | 19 | 0.18% | 25.20% |
| FTC133-p17 | (Q96HE7) ERO1-like protein alpha precursor (EC 1.8.4.-) (ERO1-Lalpha) (Oxidoreductin-1-Lalpha) (Endoplasmic oxidoreductin-1-like protein) (ERO1-L)                               | ERO1A_HUMAN | 54377 | 100% | 13 | 13 | 24 | 0.22% | 34.60% |
| FTC133-p17 | (Q96HE7) ERO1-like protein alpha precursor (EC 1.8.4.-) (ERO1-Lalpha) (Oxidoreductin-1-Lalpha) (Endoplasmic oxidoreductin-1-like protein) (ERO1-L)                               | ERO1A_HUMAN | 54377 | 100% | 8  | 9  | 15 | 0.18% | 26.30% |
| FTC133-p17 | (Q96HE7) ERO1-like protein alpha precursor (EC 1.8.4.-) (ERO1-Lalpha) (Oxidoreductin-1-Lalpha) (Endoplasmic oxidoreductin-1-like protein) (ERO1-L)                               | ERO1A_HUMAN | 54377 | 100% | 3  | 3  | 4  | 0.07% | 7.26%  |
| FTC133-p17 | (Q96HE7) ERO1-like protein alpha precursor (EC 1.8.4.-) (ERO1-Lalpha) (Oxidoreductin-1-Lalpha) (Endoplasmic oxidoreductin-1-like protein) (ERO1-L)                               | ERO1A_HUMAN | 54377 | 100% | 4  | 4  | 6  | 0.09% | 14.70% |
| FTC133-p17 | (Q96HE7) ERO1-like protein alpha precursor (EC 1.8.4.-) (ERO1-Lalpha) (Oxidoreductin-1-Lalpha) (Endoplasmic oxidoreductin-1-like protein) (ERO1-L)                               | ERO1A_HUMAN | 54377 | 100% | 13 | 14 | 23 | 0.22% | 34.80% |
| FTC133-p17 | (Q96HE7) ERO1-like protein alpha precursor (EC 1.8.4.-) (ERO1-Lalpha) (Oxidoreductin-1-Lalpha) (Endoplasmic oxidoreductin-1-like protein) (ERO1-L)                               | ERO1A_HUMAN | 54377 | 100% | 3  | 5  | 9  | 0.08% | 12.20% |

## Protein Identified Sequence Coverage in FTC-133

|            |                                                                                                                                                                                      |             |        |      |   |   |    |       |        |
|------------|--------------------------------------------------------------------------------------------------------------------------------------------------------------------------------------|-------------|--------|------|---|---|----|-------|--------|
| FTC133-p17 | (Q96HE7) ERO1-like protein alpha precursor (EC 1.8.4.-) (ERO1-Lalpha) (Oxidoreductin-1-Lalpha) (Endoplasmic oxidoreductin-1-like protein) (ERO1-L)                                   | ERO1A_HUMAN | 54377  | 100% | 2 | 2 | 4  | 0.03% | 8.76%  |
| FTC133-p17 | (Q96PK2) Microtubule-actin crosslinking factor 1, isoform 4                                                                                                                          | MACF4_HUMAN | 670132 | 100% | 2 | 2 | 3  | 0.03% | 0.51%  |
| FTC133-p17 | (Q99519) Sialidase-1 precursor (EC 3.2.1.18) (Lysosomal sialidase) (N-acetyl-alpha-neuraminidase 1) (Acetylneuraminyl hydrolase) (G9 sialidase)                                      | NEUR1_HUMAN | 45449  | 100% | 2 | 2 | 4  | 0.04% | 4.58%  |
| FTC133-p17 | (Q99519) Sialidase-1 precursor (EC 3.2.1.18) (Lysosomal sialidase) (N-acetyl-alpha-neuraminidase 1) (Acetylneuraminyl hydrolase) (G9 sialidase)                                      | NEUR1_HUMAN | 45449  | 100% | 6 | 6 | 9  | 0.08% | 17.10% |
| FTC133-p17 | (Q99519) Sialidase-1 precursor (EC 3.2.1.18) (Lysosomal sialidase) (N-acetyl-alpha-neuraminidase 1) (Acetylneuraminyl hydrolase) (G9 sialidase)                                      | NEUR1_HUMAN | 45449  | 100% | 9 | 9 | 12 | 0.11% | 31.80% |
| FTC133-p17 | (Q99519) Sialidase-1 precursor (EC 3.2.1.18) (Lysosomal sialidase) (N-acetyl-alpha-neuraminidase 1) (Acetylneuraminyl hydrolase) (G9 sialidase)                                      | NEUR1_HUMAN | 45449  | 100% | 3 | 3 | 4  | 0.05% | 8.43%  |
| FTC133-p17 | (Q99519) Sialidase-1 precursor (EC 3.2.1.18) (Lysosomal sialidase) (N-acetyl-alpha-neuraminidase 1) (Acetylneuraminyl hydrolase) (G9 sialidase)                                      | NEUR1_HUMAN | 45449  | 100% | 5 | 5 | 8  | 0.08% | 13.30% |
| FTC133-p17 | (Q9BS26) Thioredoxin domain-containing protein 4 precursor (Endoplasmic reticulum resident protein ERp44)                                                                            | TXND4_HUMAN | 46955  | 100% | 2 | 2 | 2  | 0.02% | 9.11%  |
| FTC133-p17 | (Q9H3G5) Probable serine carboxypeptidase CPVL precursor (EC 3.4.16.-) (Carboxypeptidase, vitellogenic-like) (Vitellogenic carboxypeptidase-like protein) (VCP-like protein) (HVLV)  | CPVL_HUMAN  | 54148  | 100% | 2 | 2 | 3  | 0.03% | 5.88%  |
| FTC133-p17 | (Q9NQC3) Reticulon-4 (Neurite outgrowth inhibitor) (Nogo protein) (Foocen) (Neuroendocrine-specific protein) (NSP) (Neuroendocrine-specific protein C homolog) (RTN-x) (Reticulon-5) | RTN4_HUMAN  | 129917 | 100% | 2 | 2 | 2  | 0.02% | 2.01%  |
| FTC133-p17 | (Q9NQC3) Reticulon-4 (Neurite outgrowth inhibitor) (Nogo protein) (Foocen) (Neuroendocrine-specific protein) (NSP) (Neuroendocrine-specific protein C homolog) (RTN-x) (Reticulon-5) | RTN4_HUMAN  | 129917 | 100% | 2 | 2 | 2  | 0.02% | 3.94%  |
| FTC133-p17 | (Q9UBP4) Dickkopf-related protein 3 precursor (Dkk-3) (Dickkopf-3) (hDkk-3)                                                                                                          | DKK3_HUMAN  | 38272  | 100% | 2 | 2 | 2  | 0.02% | 7.43%  |
| FTC133-p17 | (Q9UBR2) Cathepsin Z precursor (EC 3.4.22.-) (Cathepsin X) (Cathepsin P)                                                                                                             | CATZ_HUMAN  | 33850  | 100% | 2 | 2 | 2  | 0.02% | 7.26%  |
| FTC133-p17 | (Q9UBR2) Cathepsin Z precursor (EC 3.4.22.-) (Cathepsin X) (Cathepsin P)                                                                                                             | CATZ_HUMAN  | 33850  | 100% | 2 | 2 | 4  | 0.04% | 7.26%  |
| FTC133-p17 | (Q9UBR2) Cathepsin Z precursor (EC 3.4.22.-) (Cathepsin X) (Cathepsin P)                                                                                                             | CATZ_HUMAN  | 33850  | 100% | 4 | 4 | 10 | 0.09% | 15.80% |
| FTC133-p17 | (Q9UBR2) Cathepsin Z precursor (EC 3.4.22.-) (Cathepsin X) (Cathepsin P)                                                                                                             | CATZ_HUMAN  | 33850  | 100% | 2 | 2 | 3  | 0.03% | 9.24%  |

## Protein Identified Sequence Coverage in FTC-133

|            |                                                                                                                                                                                                            |             |        |      |   |   |   |       |        |
|------------|------------------------------------------------------------------------------------------------------------------------------------------------------------------------------------------------------------|-------------|--------|------|---|---|---|-------|--------|
| FTC133-p17 | (Q9UHL4) Dipeptidyl-peptidase 2 precursor (EC 3.4.14.2) (Dipeptidyl-peptidase II) (DPP II) (Dipeptidyl aminopeptidase II) (Quiescent cell proline dipeptidase) (Dipeptidyl peptidase 7)                    | DPP2_HUMAN  | 54311  | 100% | 4 | 4 | 5 | 0.05% | 11.80% |
| FTC133-p17 | (Q9UHL4) Dipeptidyl-peptidase 2 precursor (EC 3.4.14.2) (Dipeptidyl-peptidase II) (DPP II) (Dipeptidyl aminopeptidase II) (Quiescent cell proline dipeptidase) (Dipeptidyl peptidase 7)                    | DPP2_HUMAN  | 54311  | 100% | 5 | 5 | 6 | 0.06% | 13.80% |
| FTC133-p17 | (Q9UHL4) Dipeptidyl-peptidase 2 precursor (EC 3.4.14.2) (Dipeptidyl-peptidase II) (DPP II) (Dipeptidyl aminopeptidase II) (Quiescent cell proline dipeptidase) (Dipeptidyl peptidase 7)                    | DPP2_HUMAN  | 54311  | 100% | 2 | 2 | 3 | 0.04% | 6.30%  |
| FTC133-p17 | (Q9UHL4) Dipeptidyl-peptidase 2 precursor (EC 3.4.14.2) (Dipeptidyl-peptidase II) (DPP II) (Dipeptidyl aminopeptidase II) (Quiescent cell proline dipeptidase) (Dipeptidyl peptidase 7)                    | DPP2_HUMAN  | 54311  | 100% | 2 | 2 | 3 | 0.05% | 5.08%  |
| FTC133-p17 | (Q9UHL4) Dipeptidyl-peptidase 2 precursor (EC 3.4.14.2) (Dipeptidyl-peptidase II) (DPP II) (Dipeptidyl aminopeptidase II) (Quiescent cell proline dipeptidase) (Dipeptidyl peptidase 7)                    | DPP2_HUMAN  | 54311  | 100% | 4 | 4 | 5 | 0.05% | 11.00% |
| FTC133-p17 | (Q9UHL4) Dipeptidyl-peptidase 2 precursor (EC 3.4.14.2) (Dipeptidyl-peptidase II) (DPP II) (Dipeptidyl aminopeptidase II) (Quiescent cell proline dipeptidase) (Dipeptidyl peptidase 7)                    | DPP2_HUMAN  | 54311  | 100% | 3 | 4 | 5 | 0.04% | 10.40% |
| FTC133-p17 | (Q9UL46) Proteasome activator complex subunit 2 (Proteasome activator 28-beta subunit) (PA28beta) (PA28b) (Activator of multicatalytic protease subunit 2) (11S regulator complex beta subunit) (REG-beta) | PSME2_HUMAN | 27213  | 100% | 3 | 3 | 3 | 0.03% | 12.60% |
| FTC133-p17 | (Q9UM22) Mammalian ependymin-related protein 1 precursor (MERP-1) (UCC1 protein)                                                                                                                           | EPDR1_HUMAN | 25420  | 100% | 3 | 3 | 6 | 0.06% | 15.60% |
| FTC133-p17 | (Q9UM22) Mammalian ependymin-related protein 1 precursor (MERP-1) (UCC1 protein)                                                                                                                           | EPDR1_HUMAN | 25420  | 100% | 2 | 2 | 4 | 0.04% | 10.30% |
| FTC133-p17 | (Q9UM22) Mammalian ependymin-related protein 1 precursor (MERP-1) (UCC1 protein)                                                                                                                           | EPDR1_HUMAN | 25420  | 100% | 2 | 2 | 3 | 0.04% | 10.30% |
| FTC133-p17 | (Q9UM22) Mammalian ependymin-related protein 1 precursor (MERP-1) (UCC1 protein)                                                                                                                           | EPDR1_HUMAN | 25420  | 100% | 4 | 4 | 6 | 0.06% | 19.60% |
| FTC133-p17 | (Q9Y224) Protein C14orf166                                                                                                                                                                                 | CN166_HUMAN | 28051  | 100% | 2 | 2 | 2 | 0.02% | 13.90% |
| FTC133-p17 | (Q9Y224) Protein C14orf166                                                                                                                                                                                 | CN166_HUMAN | 28051  | 100% | 2 | 3 | 4 | 0.04% | 13.10% |
| FTC133-p17 | (Q9Y224) Protein C14orf166                                                                                                                                                                                 | CN166_HUMAN | 28051  | 100% | 3 | 3 | 5 | 0.05% | 18.90% |
| FTC133-p17 | (Q9Y224) Protein C14orf166                                                                                                                                                                                 | CN166_HUMAN | 28051  | 100% | 2 | 3 | 3 | 0.03% | 12.30% |
| FTC133-p17 | (Q9Y224) Protein C14orf166                                                                                                                                                                                 | CN166_HUMAN | 28051  | 100% | 3 | 3 | 6 | 0.05% | 18.90% |
| FTC133-p17 | (Q9Y490) Talin-1                                                                                                                                                                                           | TLN1_HUMAN  | 269747 | 100% | 2 | 2 | 2 | 0.02% | 1.42%  |
| FTC133-p17 | (Q9Y4L1) 150 kDa oxygen-regulated protein precursor (Orp150) (Hypoxia up-regulated 1)                                                                                                                      | OXR_P_HUMAN | 111319 | 100% | 2 | 2 | 4 | 0.04% | 2.00%  |
| FTC133-p17 | (Q9Y4L1) 150 kDa oxygen-regulated protein precursor (Orp150) (Hypoxia up-regulated 1)                                                                                                                      | OXR_P_HUMAN | 111319 | 100% | 2 | 2 | 2 | 0.02% | 2.00%  |
| FTC133-p17 | (Q9Y4L1) 150 kDa oxygen-regulated protein precursor (Orp150) (Hypoxia up-regulated 1)                                                                                                                      | OXR_P_HUMAN | 111319 | 100% | 2 | 2 | 2 | 0.02% | 2.00%  |
| FTC133-p17 | (Q9Y4L1) 150 kDa oxygen-regulated protein precursor (Orp150) (Hypoxia up-regulated 1)                                                                                                                      | OXR_P_HUMAN | 111319 | 100% | 2 | 2 | 2 | 0.02% | 2.60%  |
| FTC133-p17 | (Q9Y4L1) 150 kDa oxygen-regulated protein precursor (Orp150) (Hypoxia up-regulated 1)                                                                                                                      | OXR_P_HUMAN | 111319 | 100% | 6 | 6 | 9 | 0.08% | 10.20% |
| FTC133-p17 | (Q9Y4L1) 150 kDa oxygen-regulated protein precursor (Orp150) (Hypoxia up-regulated 1)                                                                                                                      | OXR_P_HUMAN | 111319 | 100% | 8 | 8 | 8 | 0.07% | 13.00% |
| FTC133-p17 | (Q9Y4L1) 150 kDa oxygen-regulated protein precursor (Orp150) (Hypoxia up-regulated 1)                                                                                                                      | OXR_P_HUMAN | 111319 | 100% | 6 | 6 | 6 | 0.07% | 11.10% |

## Protein Identified Sequence Coverage in FTC-133

|            |                                                                                                      |             |        |      |   |   |    |       |        |
|------------|------------------------------------------------------------------------------------------------------|-------------|--------|------|---|---|----|-------|--------|
| FTC133-p17 | (Q9Y4L1) 150 kDa oxygen-regulated protein precursor (Orp150) (Hypoxia up-regulated 1)                | OXRP_HUMAN  | 111319 | 100% | 4 | 4 | 6  | 0.09% | 8.01%  |
| FTC133-p17 | (Q9Y4L1) 150 kDa oxygen-regulated protein precursor (Orp150) (Hypoxia up-regulated 1)                | OXRP_HUMAN  | 111319 | 100% | 2 | 2 | 2  | 0.02% | 2.80%  |
| FTC133-p17 | (Q9Y4L1) 150 kDa oxygen-regulated protein precursor (Orp150) (Hypoxia up-regulated 1)                | OXRP_HUMAN  | 111319 | 100% | 5 | 5 | 6  | 0.06% | 10.10% |
| FTC133-p17 | (Q9Y4L1) 150 kDa oxygen-regulated protein precursor (Orp150) (Hypoxia up-regulated 1)                | OXRP_HUMAN  | 111319 | 100% | 6 | 8 | 12 | 0.10% | 12.50% |
| FTC133-p17 | (Q9Y4L1) 150 kDa oxygen-regulated protein precursor (Orp150) (Hypoxia up-regulated 1)                | OXRP_HUMAN  | 111319 | 100% | 2 | 3 | 4  | 0.03% | 6.61%  |
| FTC133-p17 | (Q9Y4L1) 150 kDa oxygen-regulated protein precursor (Orp150) (Hypoxia up-regulated 1)                | OXRP_HUMAN  | 111319 | 100% | 3 | 3 | 5  | 0.04% | 8.91%  |
| FTC133-p17 | (Q9Y4L1) 150 kDa oxygen-regulated protein precursor (Orp150) (Hypoxia up-regulated 1)                | OXRP_HUMAN  | 111319 | 99%  | 2 | 2 | 3  | 0.03% | 5.31%  |
| FTC133-p17 | (Q9Y625) Glypican-6 precursor                                                                        | GPC6_HUMAN  | 62718  | 100% | 2 | 2 | 2  | 0.02% | 8.29%  |
| FTC133-p17 | (Q9Y696) Chloride intracellular channel protein 4 (Intracellular chloride ion channel protein p64H1) | CLIC4_HUMAN | 28624  | 100% | 2 | 2 | 3  | 0.03% | 10.30% |

**Proteins Identified and Their Sequence Coverage in XTC-1 Cell Line**

Experiment: XTC-p13-p29

Peak List Generator:

Version: Bioworks 3.3.1  
Charge States Calculated: yes  
Deisotoped: no

Database Set:

Database Name: uniprot\_060206.fasta  
Version: 060206  
Taxonomy: Homo sapiens  
Number of Proteins: 14164

Search Engine Set: 2 Search Engines

Search Engine: Mascot

Version: 2.1.03  
Samples: All Samples  
Fragment Tolerance: 0.80 Da (Monoisotopic)  
Parent Tolerance: 1.6 Da (Monoisotopic)  
Fixed Modifications: +57 on C (Carbamidomethyl)  
Variable Modifications: +1 on N (Deamidation), +16 on M (Oxidation)  
Database: Sprot\_060206.fasta (selected for Homo sapiens, unknown version, 14164 entries)  
Digestion Enzyme: Trypsin  
Max Missed Cleavages: 2

Search Engine: X! Tandem

Version: 2007.01.01.1  
Samples: All Samples  
Fragment Tolerance: 0.100 Da (Monoisotopic)  
Parent Tolerance: 1.6 Da (Monoisotopic)  
Fixed Modifications: +57 on C (Carbamidomethyl)  
Variable Modifications: +1 on N (Deamidation), +16 on M (Oxidation)  
Database: uniprot\_sprot\_060206  
Digestion Enzyme: Trypsin  
Max Missed Cleavages: 2

Scaffold Version: Scaffold\_2\_01\_02

Peptide Thresholds: 95.0% minimum

Protein Thresholds: 99.0% minimum and 2 peptides minimum

| Biological sample name | Protein name                                                                                                                                                                 | Protein accession numbers | Protein molecular weight (Da) | Protein identification probability | Number of unique peptides | Number of unique spectra | Number of total spectra | Percentage of total spectra | Percentage sequence coverage |
|------------------------|------------------------------------------------------------------------------------------------------------------------------------------------------------------------------|---------------------------|-------------------------------|------------------------------------|---------------------------|--------------------------|-------------------------|-----------------------------|------------------------------|
| XTC1-p13               | (O00115) Deoxyribonuclease-2-alpha precursor (EC 3.1.22.1) (Deoxyribonuclease II alpha) (DNase II alpha) (Acid DNase) (Lysosomal DNase II) (R31240_2)                        | DNS2A_HUMAN               | 39563                         | 100%                               | 6                         | 6                        | 42                      | 0.07%                       | 34.20%                       |
| XTC1-p13               | (O00159) Myosin Ic (Myosin I beta) (MMI-beta) (MMIb)                                                                                                                         | MYO1C_HUMAN               | 118024                        | 100%                               | 3                         | 3                        | 7                       | 0.01%                       | 3.60%                        |
| XTC1-p13               | (O00299) Chloride intracellular channel protein 1 (Nuclear chloride ion channel 27) (NCC27) (Chloride channel ABP) (Regulatory nuclear chloride ion channel protein) (hRNCC) | CLIC1_HUMAN               | 26774                         | 100%                               | 3                         | 3                        | 4                       | 0.01%                       | 23.70%                       |

## Protein Identified Sequence Coverage in XTC-1

|          |                                                                                                                                                                                                                                                    |             |        |      |    |    |     |       |        |
|----------|----------------------------------------------------------------------------------------------------------------------------------------------------------------------------------------------------------------------------------------------------|-------------|--------|------|----|----|-----|-------|--------|
| XTC1-p13 | (O00754) Lysosomal alpha-mannosidase precursor (EC 3.2.1.24) (Mannosidase, alpha B) (Lysosomal acid alpha-mannosidase) (Laman) (Mannosidase alpha class 2B member 1) [Contains: Lysosomal alpha-mannosidase A peptide; Lysosomal alpha-mannosidase | MA2B1_HUMAN | 113656 | 100% | 7  | 7  | 11  | 0.02% | 12.20% |
| XTC1-p13 | (O14773) Tripeptidyl-peptidase 1 precursor (EC 3.4.14.9) (Tripeptidyl-peptidase I) (TPP-I) (Tripeptidyl aminopeptidase) (Lysosomal pepstatin insensitive protease) (LPIC) (Growth-inhibiting gene 1 protein)                                       | TPP1_HUMAN  | 61230  | 100% | 8  | 12 | 54  | 0.09% | 31.10% |
| XTC1-p13 | (O14818) Proteasome subunit alpha type 7 (EC 3.4.25.1) (Proteasome subunit RC6-1) (Proteasome subunit XAPC7)                                                                                                                                       | PSA7_HUMAN  | 27869  | 100% | 3  | 3  | 7   | 0.01% | 16.10% |
| XTC1-p13 | (O15031) Plexin-B2 precursor (MM1)                                                                                                                                                                                                                 | PLXB2_HUMAN | 205081 | 100% | 6  | 6  | 6   | 0.01% | 7.13%  |
| XTC1-p13 | (O15118) Niemann-Pick C1 protein precursor                                                                                                                                                                                                         | NPC1_HUMAN  | 142152 | 100% | 2  | 2  | 5   | 0.01% | 2.90%  |
| XTC1-p13 | (O43175) D-3-phosphoglycerate dehydrogenase (EC 1.1.1.95) (3-PGDH)                                                                                                                                                                                 | SERA_HUMAN  | 56501  | 100% | 2  | 2  | 3   | 0.01% | 6.58%  |
| XTC1-p13 | (O43399) Tumor protein D54 (hD54) (Tumor protein D52-like 2)                                                                                                                                                                                       | TPD54_HUMAN | 22220  | 100% | 7  | 8  | 35  | 0.06% | 41.70% |
| XTC1-p13 | (O43707) Alpha-actinin-4 (Non-muscle alpha-actinin 4) (F-actin cross linking protein)                                                                                                                                                              | ACTN4_HUMAN | 104839 | 100% | 12 | 12 | 39  | 0.07% | 19.60% |
| XTC1-p13 | (O43852) Calumenin precursor (Crocabin) (IEF SSP 9302)                                                                                                                                                                                             | CALU_HUMAN  | 37090  | 100% | 19 | 24 | 136 | 0.24% | 69.20% |
| XTC1-p13 | (O60664) Mannose-6-phosphate receptor-binding protein 1 (Cargo selection protein TIP47) (47 kDa mannose 6-phosphate receptor-binding protein) (47 kDa MPR-binding protein) (Placental protein 17) (PP17)                                           | M6PBP_HUMAN | 47028  | 100% | 11 | 12 | 51  | 0.09% | 41.70% |
| XTC1-p13 | (O60749) Sorting nexin-2 (Transformation-related gene 9 protein)                                                                                                                                                                                   | SNX2_HUMAN  | 58454  | 100% | 2  | 2  | 3   | 0.01% | 4.82%  |
| XTC1-p13 | (O60888) Protein CutA precursor (Brain acetylcholinesterase putative membrane anchor) (Acetylcholinesterase-associated protein)                                                                                                                    | CUTA_HUMAN  | 19098  | 100% | 2  | 2  | 3   | 0.01% | 22.90% |
| XTC1-p13 | (O75369) Filamin-B (FLN-B) (Beta-filamin) (Actin-binding-like protein) (Thyroid autoantigen) (Truncated actin-binding protein) (Truncated ABP) (ABP-280 homolog) (ABP-278) (Filamin 3) (Filamin homolog 1) (Fh1)                                   | FLNB_HUMAN  | 278172 | 100% | 2  | 2  | 3   | 0.01% | 2.54%  |
| XTC1-p13 | (O75882) Attractin precursor (Mahogany homolog) (DPPT-L)                                                                                                                                                                                           | ATRN_HUMAN  | 158518 | 100% | 2  | 2  | 5   | 0.01% | 2.03%  |
| XTC1-p13 | (O75976) Carboxypeptidase D precursor (EC 3.4.17.22) (Metallo-carboxypeptidase D) (gp180)                                                                                                                                                          | CBPD_HUMAN  | 152899 | 100% | 7  | 8  | 22  | 0.04% | 9.86%  |
| XTC1-p13 | (P00338) L-lactate dehydrogenase A chain (EC 1.1.1.27) (LDH-A) (LDH muscle subunit) (LDH-M) (Proliferation-inducing gene 19 protein) (NY-REN-59 antigen)                                                                                           | LDHA_HUMAN  | 36540  | 100% | 5  | 5  | 16  | 0.03% | 19.60% |
| XTC1-p13 | (P00492) Hypoxanthine-guanine phosphoribosyltransferase (EC 2.4.2.8) (HGPRT) (HGPRTase)                                                                                                                                                            | HPRT_HUMAN  | 24431  | 100% | 2  | 2  | 3   | 0.01% | 9.22%  |
| XTC1-p13 | (P00533) Epidermal growth factor receptor precursor (EC 2.7.10.1) (Receptor tyrosine-protein kinase ErbB-1)                                                                                                                                        | EGFR_HUMAN  | 134261 | 100% | 2  | 2  | 3   | 0.01% | 3.14%  |
| XTC1-p13 | (P00558) Phosphoglycerate kinase 1 (EC 2.7.2.3) (Primer recognition protein 2) (PRP 2)                                                                                                                                                             | PGK1_HUMAN  | 44466  | 100% | 10 | 11 | 39  | 0.07% | 37.50% |

## Protein Identified Sequence Coverage in XTC-1

|          |                                                                                                                                                                                                                                               |             |        |      |    |    |     |       |        |
|----------|-----------------------------------------------------------------------------------------------------------------------------------------------------------------------------------------------------------------------------------------------|-------------|--------|------|----|----|-----|-------|--------|
| XTC1-p13 | (P00918) Carbonic anhydrase 2 (EC 4.2.1.1) (Carbonic anhydrase II) (Carbonate dehydratase II) (CA-II) (Carbonic anhydrase C)                                                                                                                  | CAH2_HUMAN  | 29097  | 100% | 2  | 2  | 2   | 0.00% | 13.50% |
| XTC1-p13 | (P02545) Lamin-A/C (70 kDa lamin) (NY-REN-32 antigen)                                                                                                                                                                                         | LMNA_HUMAN  | 74123  | 100% | 11 | 12 | 31  | 0.05% | 22.70% |
| XTC1-p13 | (P02768) Serum albumin precursor                                                                                                                                                                                                              | ALBU_HUMAN  | 69349  | 100% | 6  | 7  | 28  | 0.05% | 14.60% |
| XTC1-p13 | (P04062) Glucosylceramidase precursor (EC 3.2.1.45) (Beta-glucocerebrosidase) (Acid beta-glucosidase) (D-glucosyl-N-acylsphingosine glucohydrolase) (Alglucerase) (Imiglucerase)                                                              | GLCM_HUMAN  | 59700  | 100% | 11 | 14 | 63  | 0.11% | 32.10% |
| XTC1-p13 | (P04075) Fructose-bisphosphate aldolase A (EC 4.1.2.13) (Muscle-type aldolase) (Lung cancer antigen NY-LU-1)                                                                                                                                  | ALDOA_HUMAN | 39271  | 100% | 9  | 10 | 45  | 0.08% | 36.10% |
| XTC1-p13 | (P04083) Annexin A1 (Annexin I) (Lipocortin I) (Calpactin II) (Chromobindin-9) (p35) (Phospholipase A2 inhibitory protein)                                                                                                                    | ANXA1_HUMAN | 38567  | 100% | 17 | 23 | 193 | 0.34% | 56.80% |
| XTC1-p13 | (P04216) Thy-1 membrane glycoprotein precursor (Thy-1 antigen) (CD90 antigen) (CDw90 antigen)                                                                                                                                                 | THY1_HUMAN  | 17917  | 100% | 7  | 12 | 97  | 0.17% | 54.70% |
| XTC1-p13 | (P04233) HLA class II histocompatibility antigen gamma chain (HLA-DR antigens-associated invariant chain) (Ia antigen-associated invariant chain) (Ii) (p33) (CD74 antigen)                                                                   | HG2A_HUMAN  | 33498  | 100% | 3  | 5  | 11  | 0.02% | 22.60% |
| XTC1-p13 | (P04264) Keratin, type II cytoskeletal 1 (Cytokeratin-1) (CK-1) (Keratin-1) (K1) (67 kDa cytokeratin) (Hair alpha protein)                                                                                                                    | K2C1_HUMAN  | 65870  | 100% | 9  | 10 | 32  | 0.06% | 20.80% |
| XTC1-p13 | (P04406) Glyceraldehyde-3-phosphate dehydrogenase (EC 1.2.1.12) (GAPDH)                                                                                                                                                                       | G3P_HUMAN   | 35904  | 100% | 7  | 10 | 50  | 0.09% | 32.90% |
| XTC1-p13 | (P04632) Calpain small subunit 1 (CSS1) (Calcium-dependent protease small subunit 1) (Calcium-dependent protease small subunit) (CDPS) (Calpain regulatory subunit) (Calcium-activated neutral proteinase small subunit) (CANP small subunit) | CPNS1_HUMAN | 28299  | 100% | 4  | 5  | 23  | 0.04% | 26.90% |
| XTC1-p13 | (P04792) Heat-shock protein beta-1 (HspB1) (Heat shock 27 kDa protein) (HSP 27) (Stress-responsive protein 27) (SRP27) (Estrogen-regulated 24 kDa protein) (28 kDa heat shock protein)                                                        | HSPB1_HUMAN | 22765  | 100% | 10 | 13 | 94  | 0.16% | 73.20% |
| XTC1-p13 | (P04843) Dolichyl-diphosphooligosaccharide--protein glycosyltransferase 67 kDa subunit precursor (EC 2.4.1.119) (Ribophorin I) (RPN-I)                                                                                                        | RIB1_HUMAN  | 68553  | 100% | 2  | 2  | 2   | 0.00% | 5.27%  |
| XTC1-p13 | (P04844) Dolichyl-diphosphooligosaccharide--protein glycosyltransferase 63 kDa subunit precursor (EC 2.4.1.119) (Ribophorin II) (RPN-II) (RIBIIR)                                                                                             | RIB2_HUMAN  | 69267  | 100% | 2  | 2  | 2   | 0.00% | 5.71%  |
| XTC1-p13 | (P04899) Guanine nucleotide-binding protein G(i), alpha-2 subunit (Adenylate cyclase-inhibiting G alpha protein)                                                                                                                              | GNAI2_HUMAN | 40303  | 100% | 2  | 2  | 4   | 0.01% | 7.06%  |
| XTC1-p13 | (P05023) Sodium/potassium-transporting ATPase alpha-1 chain precursor (EC 3.6.3.9) (Sodium pump 1) (Na+/K+ ATPase 1)                                                                                                                          | AT1A1_HUMAN | 112882 | 100% | 9  | 10 | 17  | 0.03% | 15.20% |
| XTC1-p13 | (P05026) Sodium/potassium-transporting ATPase subunit beta-1 (Sodium/potassium-dependent ATPase beta-1 subunit)                                                                                                                               | AT1B1_HUMAN | 35045  | 100% | 4  | 4  | 6   | 0.01% | 20.80% |

## Protein Identified Sequence Coverage in XTC-1

|          |                                                                                                                                                                                                                            |             |        |      |    |    |     |       |        |
|----------|----------------------------------------------------------------------------------------------------------------------------------------------------------------------------------------------------------------------------|-------------|--------|------|----|----|-----|-------|--------|
| XTC1-p13 | (P05106) Integrin beta-3 precursor (Platelet membrane glycoprotein IIIa) (GPIIIa) (CD61 antigen)                                                                                                                           | ITB3_HUMAN  | 87196  | 100% | 2  | 2  | 2   | 0.00% | 4.44%  |
| XTC1-p13 | (P05362) Intercellular adhesion molecule 1 precursor (ICAM-1) (Major group rhinovirus receptor) (CD54 antigen)                                                                                                             | ICAM1_HUMAN | 57807  | 100% | 14 | 14 | 51  | 0.09% | 43.60% |
| XTC1-p13 | (P05387) 60S acidic ribosomal protein P2 (NY-REN-44 antigen)                                                                                                                                                               | RLA2_HUMAN  | 11647  | 100% | 3  | 3  | 8   | 0.01% | 53.00% |
| XTC1-p13 | (P05388) 60S acidic ribosomal protein P0 (L10E)                                                                                                                                                                            | RLA0_HUMAN  | 34256  | 100% | 6  | 6  | 15  | 0.03% | 29.70% |
| XTC1-p13 | (P05455) Lupus La protein (Sjogren syndrome type B antigen) (SS-B) (La ribonucleoprotein) (La autoantigen)                                                                                                                 | LA_HUMAN    | 46821  | 100% | 2  | 2  | 4   | 0.01% | 6.86%  |
| XTC1-p13 | (P05556) Integrin beta-1 precursor (Fibronectin receptor beta subunit) (Integrin VLA-4 beta subunit) (CD29 antigen)                                                                                                        | ITB1_HUMAN  | 88447  | 100% | 11 | 12 | 24  | 0.04% | 19.20% |
| XTC1-p13 | (P05783) Keratin, type I cytoskeletal 18 (Cytokeratin-18) (CK-18) (Keratin-18) (K18)                                                                                                                                       | K1C18_HUMAN | 47910  | 100% | 10 | 14 | 46  | 0.08% | 40.30% |
| XTC1-p13 | (P05787) Keratin, type II cytoskeletal 8 (Cytokeratin-8) (CK-8) (Keratin-8) (K8)                                                                                                                                           | K2C8_HUMAN  | 53557  | 100% | 13 | 13 | 67  | 0.12% | 30.90% |
| XTC1-p13 | (P06276) Cholinesterase precursor (EC 3.1.1.8) (Acylcholine acylhydrolase) (Choline esterase II) (Butyrylcholine esterase) (Pseudocholinesterase)                                                                          | CHLE_HUMAN  | 68402  | 100% | 3  | 4  | 10  | 0.02% | 9.97%  |
| XTC1-p13 | (P06280) Alpha-galactosidase A precursor (EC 3.2.1.22) (Melibiase) (Alpha-D-galactoside galactohydrolase) (Alpha-D-galactosidase A) (Agalsidase alfa)                                                                      | AGAL_HUMAN  | 48750  | 100% | 3  | 3  | 4   | 0.01% | 8.62%  |
| XTC1-p13 | (P06576) ATP synthase beta chain, mitochondrial precursor (EC 3.6.3.14)                                                                                                                                                    | ATPB_HUMAN  | 56543  | 100% | 6  | 6  | 8   | 0.01% | 17.60% |
| XTC1-p13 | (P06703) Protein S100-A6 (S100 calcium-binding protein A6) (Calcyclin) (Prolactin receptor-associated protein) (PRA) (Growth factor-inducible protein 2A9) (MLN 4)                                                         | S10A6_HUMAN | 10162  | 100% | 4  | 5  | 18  | 0.03% | 30.00% |
| XTC1-p13 | (P06733) Alpha-enolase (EC 4.2.1.11) (2-phospho-D-glycerate hydro-lyase) (Non-neural enolase) (NNE) (Enolase 1) (Phosphopyruvate hydratase) (C-myc promoter-binding protein) (MBP-1) (MPB-1) (Plasminogen-binding protein) | ENOA_HUMAN  | 47021  | 100% | 15 | 20 | 159 | 0.28% | 55.20% |
| XTC1-p13 | (P06744) Glucose-6-phosphate isomerase (EC 5.3.1.9) (GPI) (Phosphoglucose isomerase) (PGI) (Phosphohexose isomerase) (PHI) (Neuroleukin) (NLK) (Sperm antigen 36) (SA-36)                                                  | G6PI_HUMAN  | 62999  | 100% | 2  | 2  | 4   | 0.01% | 5.39%  |
| XTC1-p13 | (P06748) Nucleophosmin (NPM) (Nucleolar phosphoprotein B23) (Numatrin) (Nucleolar protein NO38)                                                                                                                            | NPM_HUMAN   | 32557  | 100% | 5  | 7  | 41  | 0.07% | 25.90% |
| XTC1-p13 | (P06753) Tropomyosin alpha-3 chain (Tropomyosin-3) (Tropomyosin gamma) (hTM5)                                                                                                                                              | TPM3_HUMAN  | 32802  | 100% | 2  | 2  | 11  | 0.02% | 12.00% |
| XTC1-p13 | (P06756) Integrin alpha-V precursor (Vitronectin receptor alpha subunit) (CD51 antigen) [Contains: Integrin alpha-V heavy chain; Integrin alpha-V light chain]                                                             | ITAV_HUMAN  | 116037 | 100% | 14 | 16 | 51  | 0.09% | 22.60% |
| XTC1-p13 | (P06865) Beta-hexosaminidase alpha chain precursor (EC 3.2.1.52) (N-acetyl-beta-glucosaminidase) (Beta-N-acetylhexosaminidase) (Hexosaminidase A)                                                                          | HEXA_HUMAN  | 60672  | 100% | 18 | 22 | 104 | 0.18% | 36.10% |



## Protein Identified Sequence Coverage in XTC-1

|          |                                                                                                                                                                                                                                                      |             |       |      |    |    |     |       |        |
|----------|------------------------------------------------------------------------------------------------------------------------------------------------------------------------------------------------------------------------------------------------------|-------------|-------|------|----|----|-----|-------|--------|
| XTC1-p13 | (P07195) L-lactate dehydrogenase B chain (EC 1.1.1.27) (LDH-B) (LDH heart subunit) (LDH-H) (NY-REN-46 antigen)                                                                                                                                       | LDHB_HUMAN  | 36489 | 100% | 9  | 9  | 28  | 0.05% | 37.80% |
| XTC1-p13 | (P07237) Protein disulfide-isomerase precursor (EC 5.3.4.1) (PDI) (Prolyl 4-hydroxylase beta subunit) (Cellular thyroid hormone-binding protein) (p55)                                                                                               | PDIA1_HUMAN | 57100 | 100% | 9  | 11 | 28  | 0.05% | 24.80% |
| XTC1-p13 | (P07339) Cathepsin D precursor (EC 3.4.23.5) [Contains: Cathepsin D light chain; Cathepsin D heavy chain]                                                                                                                                            | CATD_HUMAN  | 44535 | 100% | 17 | 24 | 327 | 0.57% | 58.70% |
| XTC1-p13 | (P07355) Annexin A2 (Annexin II) (Lipocortin II) (Calpactin I heavy chain) (Chromobindin-8) (p36) (Protein I) (Placental anticoagulant protein IV) (PAP-IV)                                                                                          | ANXA2_HUMAN | 38457 | 100% | 24 | 33 | 449 | 0.78% | 63.60% |
| XTC1-p13 | (P07437) Tubulin beta-2 chain                                                                                                                                                                                                                        | TBB2_HUMAN  | 49653 | 100% | 16 | 20 | 117 | 0.20% | 55.00% |
| XTC1-p13 | (P07602) Proactivator polypeptide precursor [Contains: Saposin A (Protein A); Saposin B-Val; Saposin B (Sphingolipid activator protein 1) (SAP-1) (Cerebroside sulfate activator) (CSAct) (Dispersin) (Sulfatide/GM1 activator); Saposin C (Co-beta- | SAP_HUMAN   | 58094 | 100% | 24 | 34 | 499 | 0.87% | 49.00% |
| XTC1-p13 | (P07686) Beta-hexosaminidase beta chain precursor (EC 3.2.1.52) (N-acetyl-beta-glucosaminidase) (Beta-N-acetylhexosaminidase) (Hexosaminidase B) (Cervical cancer proto-oncogene 7) (HCC-7) [Contains: Beta-hexosaminidase beta-B chain; Beta-hexos  | HEXB_HUMAN  | 63095 | 100% | 16 | 18 | 174 | 0.30% | 48.00% |
| XTC1-p13 | (P07711) Cathepsin L precursor (EC 3.4.22.15) (Major excreted protein) (MEP) [Contains: Cathepsin L heavy chain; Cathepsin L light chain]                                                                                                            | CATL_HUMAN  | 37546 | 100% | 7  | 8  | 20  | 0.03% | 34.20% |
| XTC1-p13 | (P07737) Profilin-1 (Profilin I)                                                                                                                                                                                                                     | PROF1_HUMAN | 14905 | 100% | 5  | 5  | 28  | 0.05% | 47.50% |
| XTC1-p13 | (P07858) Cathepsin B precursor (EC 3.4.22.1) (Cathepsin B1) (APP secretase) (APPS) [Contains: Cathepsin B light chain; Cathepsin B heavy chain]                                                                                                      | CATB_HUMAN  | 37803 | 100% | 7  | 8  | 22  | 0.04% | 34.50% |
| XTC1-p13 | (P07900) Heat shock protein HSP 90-alpha (HSP 86) (NY-REN-38 antigen)                                                                                                                                                                                | HS90A_HUMAN | 84514 | 100% | 6  | 6  | 21  | 0.04% | 23.10% |
| XTC1-p13 | (P07910) Heterogeneous nuclear ribonucleoproteins C1/C2 (hnRNP C1 / hnRNP C2)                                                                                                                                                                        | HNRPC_HUMAN | 33653 | 100% | 2  | 2  | 2   | 0.00% | 9.15%  |
| XTC1-p13 | (P08107) Heat shock 70 kDa protein 1 (HSP70.1) (HSP70-1/HSP70-2)                                                                                                                                                                                     | HSP71_HUMAN | 70036 | 100% | 5  | 5  | 12  | 0.02% | 15.00% |
| XTC1-p13 | (P08133) Annexin A6 (Annexin VI) (Lipocortin VI) (P68) (P70) (Protein III) (Chromobindin-20) (67 kDa calelectrin) (Calphobindin-II) (CPB-II)                                                                                                         | ANXA6_HUMAN | 75728 | 100% | 2  | 2  | 3   | 0.01% | 7.14%  |
| XTC1-p13 | (P08174) Complement decay-accelerating factor precursor (CD55 antigen)                                                                                                                                                                               | DAF_HUMAN   | 41382 | 100% | 3  | 3  | 3   | 0.01% | 10.20% |
| XTC1-p13 | (P08195) 4F2 cell-surface antigen heavy chain (4F2hc) (Lymphocyte activation antigen 4F2 large subunit) (4F2 heavy chain antigen) (CD98 antigen)                                                                                                     | 4F2_HUMAN   | 57929 | 100% | 8  | 9  | 21  | 0.04% | 23.10% |
| XTC1-p13 | (P08236) Beta-glucuronidase precursor (EC 3.2.1.31) (Beta-G1)                                                                                                                                                                                        | BGLR_HUMAN  | 74699 | 100% | 2  | 2  | 4   | 0.01% | 5.07%  |

## Protein Identified Sequence Coverage in XTC-1

|          |                                                                                                                                                                                                                                        |             |        |      |    |    |    |       |        |
|----------|----------------------------------------------------------------------------------------------------------------------------------------------------------------------------------------------------------------------------------------|-------------|--------|------|----|----|----|-------|--------|
| XTC1-p13 | (P08238) Heat shock protein HSP 90-beta (HSP 84) (HSP 90)                                                                                                                                                                              | HS90B_HUMAN | 83118  | 100% | 14 | 16 | 50 | 0.09% | 28.80% |
| XTC1-p13 | (P08571) Monocyte differentiation antigen CD14 precursor (Myeloid cell-specific leucine-rich glycoprotein) [Contains: Monocyte differentiation antigen CD14, urinary form; Monocyte differentiation antigen CD14, membrane-bound form] | CD14_HUMAN  | 40059  | 100% | 7  | 9  | 43 | 0.07% | 31.50% |
| XTC1-p13 | (P08582) Melanotransferrin precursor (Melanoma-associated antigen p97) (CD228 antigen)                                                                                                                                                 | TRFM_HUMAN  | 80223  | 100% | 11 | 12 | 27 | 0.05% | 26.00% |
| XTC1-p13 | (P08648) Integrin alpha-5 precursor (Fibronectin receptor alpha subunit) (Integrin alpha-F) (VLA-5) (CD49e antigen) [Contains: Integrin alpha-5 heavy chain; Integrin alpha-5 light chain]                                             | ITA5_HUMAN  | 114521 | 100% | 3  | 3  | 10 | 0.02% | 4.96%  |
| XTC1-p13 | (P08670) Vimentin                                                                                                                                                                                                                      | VIME_HUMAN  | 53503  | 100% | 16 | 17 | 49 | 0.09% | 40.90% |
| XTC1-p13 | (P08727) Keratin, type I cytoskeletal 19 (Cytokeratin-19) (CK-19) (Keratin-19) (K19)                                                                                                                                                   | K1C19_HUMAN | 44075  | 100% | 12 | 12 | 43 | 0.07% | 38.20% |
| XTC1-p13 | (P08729) Keratin, type II cytoskeletal 7 (Cytokeratin-7) (CK-7) (Keratin-7) (K7) (Sarcolelectin)                                                                                                                                       | K2C7_HUMAN  | 51270  | 100% | 8  | 8  | 26 | 0.05% | 19.70% |
| XTC1-p13 | (P08758) Annexin A5 (Annexin V) (Lipocortin V) (Endonexin II) (Calphobindin I) (CBP-I) (Placental anticoagulant protein I) (PAP-I) (PP4) (Thromboplastin inhibitor) (Vascular anticoagulant-alpha) (VAC-alpha) (Anchorin CII)          | ANXA5_HUMAN | 35789  | 100% | 13 | 18 | 99 | 0.17% | 58.30% |
| XTC1-p13 | (P08865) 40S ribosomal protein SA (p40) (34/67 kDa laminin receptor) (Colon carcinoma laminin-binding protein) (NEM/1CHD4) (Multidrug resistance-associated protein MGr1-Ag)                                                           | RSSA_HUMAN  | 32705  | 100% | 10 | 13 | 62 | 0.11% | 47.30% |
| XTC1-p13 | (P08962) CD63 antigen (Melanoma-associated antigen ME491) (Lysosome-associated membrane glycoprotein 3) (LAMP-3) (Ocular melanoma-associated antigen) (OMA81H) (Granulophysin) (Tetraspanin-30) (Tspan-30)                             | CD63_HUMAN  | 25487  | 100% | 7  | 9  | 27 | 0.05% | 28.70% |
| XTC1-p13 | (P09104) Gamma-enolase (EC 4.2.1.11) (2-phospho D-glycerate hydro-lyase) (Neural enolase) (Neuron-specific enolase) (NSE) (Enolase 2)                                                                                                  | ENOG_HUMAN  | 47121  | 100% | 2  | 2  | 2  | 0.00% | 16.20% |
| XTC1-p13 | (P09211) Glutathione S-transferase P (EC 2.5.1.18) (GST class-pi) (GSTP1-1)                                                                                                                                                            | GSTP1_HUMAN | 23208  | 100% | 3  | 3  | 9  | 0.02% | 24.40% |
| XTC1-p13 | (P09382) Galectin-1 (Lectin galactoside-binding soluble 1) (Beta-galactoside-binding lectin L-14-I) (Lactose-binding lectin 1) (S-Lac lectin 1) (Galaptin) (14 kDa lectin) (HPL) (HBL) (Putative MAPK-activating protein MP12)         | LEG1_HUMAN  | 14567  | 100% | 4  | 4  | 19 | 0.03% | 48.50% |
| XTC1-p13 | (P09429) High mobility group protein B1 (High mobility group protein 1) (HMG-1)                                                                                                                                                        | HMGB1_HUMAN | 24746  | 100% | 4  | 5  | 11 | 0.02% | 19.20% |
| XTC1-p13 | (P09486) SPARC precursor (Secreted protein acidic and rich in cysteine) (Osteonectin) (ON) (Basement-membrane protein 40) (BM-40)                                                                                                      | SPRC_HUMAN  | 34614  | 100% | 10 | 11 | 35 | 0.06% | 31.70% |
| XTC1-p13 | (P09493) Tropomyosin 1 alpha chain (Alpha-tropomyosin)                                                                                                                                                                                 | TPM1_HUMAN  | 32692  | 100% | 4  | 4  | 13 | 0.02% | 12.70% |

## Protein Identified Sequence Coverage in XTC-1

|          |                                                                                                                                                                                                                                                        |             |        |      |    |    |     |       |        |
|----------|--------------------------------------------------------------------------------------------------------------------------------------------------------------------------------------------------------------------------------------------------------|-------------|--------|------|----|----|-----|-------|--------|
| XTC1-p13 | (P09651) Heterogeneous nuclear ribonucleoprotein A1 (Helix-destabilizing protein) (Single-strand RNA-binding protein) (hnRNP core protein A1)                                                                                                          | ROA1_HUMAN  | 38697  | 100% | 3  | 3  | 12  | 0.02% | 10.50% |
| XTC1-p13 | (P09661) U2 small nuclear ribonucleoprotein A' (U2 snRNP-A')                                                                                                                                                                                           | RU2A_HUMAN  | 28399  | 100% | 4  | 4  | 8   | 0.01% | 21.20% |
| XTC1-p13 | (P09668) Cathepsin H precursor (EC 3.4.22.16) [Contains: Cathepsin H mini chain; Cathepsin H heavy chain; Cathepsin H light chain]                                                                                                                     | CATH_HUMAN  | 37360  | 100% | 5  | 6  | 13  | 0.02% | 28.70% |
| XTC1-p13 | (P0C0S5) Histone H2A.Z (H2A/z)                                                                                                                                                                                                                         | H2AZ_HUMAN  | 13404  | 100% | 2  | 2  | 8   | 0.01% | 35.40% |
| XTC1-p13 | (P10253) Lysosomal alpha-glucosidase precursor (EC 3.2.1.20) (Acid maltase) (Aglucosidase alfa) [Contains: 76 kDa lysosomal alpha-glucosidase; 70 kDa lysosomal alpha-glucosidase]                                                                     | LYAG_HUMAN  | 105321 | 100% | 18 | 21 | 130 | 0.23% | 27.00% |
| XTC1-p13 | (P10619) Lysosomal protective protein precursor (EC 3.4.16.5) (Cathepsin A) (Carboxypeptidase C) (Protective protein for beta-galactosidase) [Contains: Lysosomal protective protein 32 kDa chain; Lysosomal protective protein 20 kDa chain]          | PPGB_HUMAN  | 54450  | 100% | 11 | 16 | 124 | 0.22% | 31.70% |
| XTC1-p13 | (P10809) 60 kDa heat shock protein, mitochondrial precursor (Hsp60) (60 kDa chaperonin) (CPN60) (Heat shock protein 60) (HSP-60) (Mitochondrial matrix protein P1) (P60 lymphocyte protein) (HuCHA60)                                                  | CH60_HUMAN  | 61038  | 100% | 9  | 11 | 26  | 0.05% | 24.80% |
| XTC1-p13 | (P10909) Clusterin precursor (Complement-associated protein SP-40,40) (Complement cytotoxicity inhibitor) (CLI) (NA1/NA2) (Apolipoprotein J) (Apo-J) (Testosterone-repressed prostate message 2) (TRPM-2) [Contains: Clusterin beta chain (ApoJalpha)] | CLUS_HUMAN  | 52477  | 100% | 5  | 5  | 12  | 0.02% | 19.20% |
| XTC1-p13 | (P11021) 78 kDa glucose-regulated protein precursor (GRP 78) (Immunoglobulin heavy chain-binding protein) (BiP) (Endoplasmic reticulum lumenal Ca(2+)-binding protein grp78)                                                                           | GRP78_HUMAN | 72317  | 100% | 21 | 26 | 176 | 0.31% | 42.40% |
| XTC1-p13 | (P11117) Lysosomal acid phosphatase precursor (EC 3.1.3.2) (LAP)                                                                                                                                                                                       | PPAL_HUMAN  | 48299  | 100% | 5  | 6  | 10  | 0.02% | 16.10% |
| XTC1-p13 | (P11142) Heat shock cognate 71 kDa protein (Heat shock 70 kDa protein 8)                                                                                                                                                                               | HSP7C_HUMAN | 70882  | 100% | 17 | 20 | 65  | 0.11% | 39.30% |
| XTC1-p13 | (P11177) Pyruvate dehydrogenase E1 component subunit beta, mitochondrial precursor (EC 1.2.4.1) (PDHE1-B)                                                                                                                                              | ODPB_HUMAN  | 39201  | 100% | 2  | 2  | 3   | 0.01% | 8.91%  |
| XTC1-p13 | (P11279) Lysosome-associated membrane glycoprotein 1 precursor (LAMP-1) (CD107a antigen)                                                                                                                                                               | LAMP1_HUMAN | 44756  | 100% | 10 | 13 | 74  | 0.13% | 33.90% |
| XTC1-p13 | (P11717) Cation-independent mannose-6-phosphate receptor precursor (CI Man-6-P receptor) (CI-MPR) (M6PR) (Insulin-like growth factor 2 receptor) (Insulin like growth factor II receptor) (IGF-II receptor) (M6P/IGF2 receptor) (M6P/IGF2R) (300 kD)   | MPRI_HUMAN  | 274256 | 100% | 2  | 2  | 3   | 0.01% | 1.32%  |
| XTC1-p13 | (P12004) Proliferating cell nuclear antigen (PCNA) (Cyclin)                                                                                                                                                                                            | PCNA_HUMAN  | 28751  | 100% | 2  | 2  | 3   | 0.01% | 12.30% |

## Protein Identified Sequence Coverage in XTC-1

|          |                                                                                                                                                                                                                                                      |             |        |      |    |    |     |       |        |
|----------|------------------------------------------------------------------------------------------------------------------------------------------------------------------------------------------------------------------------------------------------------|-------------|--------|------|----|----|-----|-------|--------|
| XTC1-p13 | (P12277) Creatine kinase B-type (EC 2.7.3.2) (Creatine kinase, B chain) (B-CK)                                                                                                                                                                       | KCRB_HUMAN  | 42627  | 100% | 3  | 3  | 17  | 0.03% | 14.20% |
| XTC1-p13 | (P12429) Annexin A3 (Annexin III) (Lipocortin III) (Placental anticoagulant protein III) (PAP-III) (35-alpha calcimedlin) (Inositol 1,2-cyclic phosphate 2-phosphohydrolase)                                                                         | ANXA3_HUMAN | 36228  | 100% | 8  | 8  | 26  | 0.05% | 33.90% |
| XTC1-p13 | (P12814) Alpha-actinin-1 (Alpha-actinin cytoskeletal isoform) (Non-muscle alpha-actinin-1) (F-actin cross linking protein)                                                                                                                           | ACTN1_HUMAN | 103043 | 100% | 2  | 2  | 3   | 0.01% | 10.80% |
| XTC1-p13 | (P13010) ATP-dependent DNA helicase 2 subunit 2 (EC 3.6.1.-) (ATP-dependent DNA helicase II 80 kDa subunit) (Lupus Ku autoantigen protein p86) (Ku86) (Ku80) (86 kDa subunit of Ku antigen) (Thyroid-lupus autoantigen) (TLAA) (CTC box-binding fac  | KU86_HUMAN  | 82558  | 100% | 3  | 3  | 4   | 0.01% | 9.58%  |
| XTC1-p13 | (P13284) Gamma-interferon-inducible lysosomal thiol reductase precursor (Gamma-interferon-inducible protein IP-30)                                                                                                                                   | GILT_HUMAN  | 29131  | 100% | 4  | 5  | 30  | 0.05% | 33.00% |
| XTC1-p13 | (P13473) Lysosome-associated membrane glycoprotein 2 precursor (LAMP-2) (CD107b antigen)                                                                                                                                                             | LAMP2_HUMAN | 44943  | 100% | 5  | 7  | 58  | 0.10% | 22.40% |
| XTC1-p13 | (P13591) Neural cell adhesion molecule 1, 140 kDa isoform precursor (N-CAM 140) (NCAM-140) (CD56 antigen)                                                                                                                                            | NCA11_HUMAN | 93343  | 100% | 3  | 4  | 11  | 0.02% | 5.78%  |
| XTC1-p13 | (P13639) Elongation factor 2 (EF-2)                                                                                                                                                                                                                  | EF2_HUMAN   | 95191  | 100% | 6  | 7  | 18  | 0.03% | 11.20% |
| XTC1-p13 | (P13645) Keratin, type I cytoskeletal 10 (Cytokeratin-10) (CK-10) (Keratin-10) (K10)                                                                                                                                                                 | K1C10_HUMAN | 59502  | 100% | 3  | 3  | 5   | 0.01% | 11.10% |
| XTC1-p13 | (P13667) Protein disulfide-isomerase A4 precursor (EC 5.3.4.1) (Protein ERp-72) (ERp72)                                                                                                                                                              | PDIA4_HUMAN | 72916  | 100% | 11 | 11 | 44  | 0.08% | 19.20% |
| XTC1-p13 | (P13693) Translationally-controlled tumor protein (TCTP) (p23) (Histamine-releasing factor) (HRF) (Fortilin)                                                                                                                                         | TCTP_HUMAN  | 19578  | 100% | 2  | 2  | 2   | 0.00% | 20.90% |
| XTC1-p13 | (P13797) Plastin-3 (T-plastin)                                                                                                                                                                                                                       | PLST_HUMAN  | 70421  | 100% | 13 | 15 | 41  | 0.07% | 27.00% |
| XTC1-p13 | (P13987) CD59 glycoprotein precursor (Membrane attack complex inhibition factor) (MACIF) (MAC-inhibitory protein) (MAC-IP) (Protectin) (MEM43 antigen) (Membrane inhibitor of reactive lysis) (MIRL) (20 kDa homologous restriction factor) (HRF-20) | CD59_HUMAN  | 14159  | 100% | 5  | 7  | 132 | 0.23% | 37.50% |
| XTC1-p13 | (P14314) Glucosidase 2 beta subunit precursor (Glucosidase II beta subunit) (Protein kinase C substrate, 60.1 kDa protein, heavy chain) (PKCSH) (80K-H protein)                                                                                      | GLU2B_HUMAN | 59279  | 100% | 9  | 10 | 29  | 0.05% | 28.30% |
| XTC1-p13 | (P14618) Pyruvate kinase isozymes M1/M2 (EC 2.7.1.40) (Pyruvate kinase muscle isozyme) (Cytosolic thyroid hormone-binding protein) (CTHBP) (THBP1)                                                                                                   | KPYM_HUMAN  | 57788  | 100% | 16 | 22 | 70  | 0.12% | 44.30% |
| XTC1-p13 | (P14625) Endoplasmic precursor (Heat shock protein 90 kDa beta member 1) (94 kDa glucose-regulated protein) (GRP94) (gp96 homolog) (Tumor rejection antigen 1)                                                                                       | ENPL_HUMAN  | 92454  | 100% | 10 | 11 | 30  | 0.05% | 20.40% |
| XTC1-p13 | (P14927) Ubiquinol-cytochrome c reductase complex 14 kDa protein (EC 1.10.2.2) (Complex III subunit VI) (QP-C)                                                                                                                                       | UCR6_HUMAN  | 13382  | 100% | 2  | 2  | 6   | 0.01% | 20.90% |

## Protein Identified Sequence Coverage in XTC-1

|          |                                                                                                                                                                                                                                                     |             |        |      |    |    |     |       |        |
|----------|-----------------------------------------------------------------------------------------------------------------------------------------------------------------------------------------------------------------------------------------------------|-------------|--------|------|----|----|-----|-------|--------|
| XTC1-p13 | (P15289) Arylsulfatase A precursor (EC 3.1.6.8) (ASA) (Cerebroside-sulfatase) [Contains: Arylsulfatase A component B; Arylsulfatase A component C]                                                                                                  | ARSA_HUMAN  | 53571  | 100% | 6  | 9  | 56  | 0.10% | 19.30% |
| XTC1-p13 | (P15311) Ezrin (p81) (Cytovillin) (Villin-2)                                                                                                                                                                                                        | EZRI_HUMAN  | 69251  | 100% | 2  | 2  | 2   | 0.00% | 10.30% |
| XTC1-p13 | (P15531) Nucleoside diphosphate kinase A (EC 2.7.4.6) (NDK A) (NDP kinase A) (Tumor metastatic process-associated protein) (Metastasis inhibition factor nm23) (nm23-H1) (Granzyme A-activated DNase) (GAAD)                                        | NDKA_HUMAN  | 17131  | 100% | 2  | 2  | 11  | 0.02% | 40.80% |
| XTC1-p13 | (P15586) N-acetylglucosamine-6-sulfatase precursor (EC 3.1.6.14) (G6S) (Glucosamine-6-sulfatase)                                                                                                                                                    | GL6S_HUMAN  | 62066  | 100% | 21 | 23 | 195 | 0.34% | 57.60% |
| XTC1-p13 | (P15848) Arylsulfatase B precursor (EC 3.1.6.12) (ASB) (N-acetylgalactosamine-4-sulfatase) (G4S)                                                                                                                                                    | ARSB_HUMAN  | 59671  | 100% | 4  | 4  | 6   | 0.01% | 14.60% |
| XTC1-p13 | (P15941) Mucin-1 precursor (MUC-1) (Polymorphic epithelial mucin) (PEM) (PEMT) (Episialin) (Tumor-associated mucin) (Carcinoma-associated mucin) (Tumor-associated epithelial membrane antigen) (EMA) (H23AG) (Peanut-reactive urinary mucin) (PUM) | MUC1_HUMAN  | 122051 | 100% | 4  | 4  | 18  | 0.03% | 3.98%  |
| XTC1-p13 | (P16070) CD44 antigen precursor (Phagocytic glycoprotein I) (PGP-1) (HUTCH-I) (Extracellular matrix receptor-III) (ECMR-III) (GP90 lymphocyte homing/adhesion receptor) (Hermes antigen) (Hyaluronate receptor) (Heparan sulfate proteoglycan) (Epi | CD44_HUMAN  | 81535  | 100% | 4  | 5  | 39  | 0.07% | 7.01%  |
| XTC1-p13 | (P16278) Beta-galactosidase precursor (EC 3.2.1.23) (Lactase) (Acid beta-galactosidase)                                                                                                                                                             | BGAL_HUMAN  | 76076  | 100% | 14 | 15 | 67  | 0.12% | 26.90% |
| XTC1-p13 | (P16402) Histone H1.3 (Histone H1c)                                                                                                                                                                                                                 | H13_HUMAN   | 22202  | 100% | 3  | 3  | 9   | 0.02% | 13.20% |
| XTC1-p13 | (P17050) Alpha-N-acetylgalactosaminidase precursor (EC 3.2.1.49) (Alpha-galactosidase B)                                                                                                                                                            | NAGAB_HUMAN | 46548  | 100% | 9  | 10 | 43  | 0.07% | 33.30% |
| XTC1-p13 | (P17301) Integrin alpha-2 precursor (Platelet membrane glycoprotein Ia) (GPIa) (Collagen receptor) (VLA-2 alpha chain) (CD49b antigen)                                                                                                              | ITA2_HUMAN  | 129280 | 100% | 6  | 6  | 14  | 0.02% | 10.20% |
| XTC1-p13 | (P17900) Ganglioside GM2 activator precursor (GM2-AP) (Cerebroside sulfate activator protein) (Shingolipid activator protein 3) (SAP-3) [Contains: Ganglioside GM2 activator isoform short]                                                         | SAP3_HUMAN  | 20805  | 100% | 6  | 7  | 29  | 0.05% | 59.10% |
| XTC1-p13 | (P18583) SON protein (SON3) (Negative regulatory element-binding protein) (NRE-binding protein) (DBP 5) (Bax antagonist selected in saccharomyces 1) (BASS1)                                                                                        | SON_HUMAN   | 263828 | 100% | 3  | 3  | 4   | 0.01% | 2.35%  |
| XTC1-p13 | (P18669) Phosphoglycerate mutase 1 (EC 5.4.2.1) (EC 5.4.2.4) (EC 3.1.3.13) (Phosphoglycerate mutase isozyme B) (PGAM-B) (BPG-dependent PGAM 1)                                                                                                      | PGAM1_HUMAN | 28656  | 100% | 3  | 3  | 8   | 0.01% | 20.60% |
| XTC1-p13 | (P18859) ATP synthase coupling factor 6, mitochondrial precursor (EC 3.6.3.14) (ATPase subunit F6)                                                                                                                                                  | ATP5J_HUMAN | 12570  | 100% | 3  | 3  | 13  | 0.02% | 44.40% |
| XTC1-p13 | (P19022) Neural-cadherin precursor (N-cadherin) (Cadherin-2) (CDw325 antigen)                                                                                                                                                                       | CADH2_HUMAN | 99836  | 100% | 4  | 4  | 16  | 0.03% | 13.20% |
| XTC1-p13 | (P19105) Myosin regulatory light chain 2, nonsarcomeric (Myosin RLC)                                                                                                                                                                                | MLRM_HUMAN  | 19646  | 100% | 7  | 7  | 15  | 0.03% | 58.20% |

## Protein Identified Sequence Coverage in XTC-1

|          |                                                                                                                                                                                                                                                      |             |        |      |    |    |    |       |        |
|----------|------------------------------------------------------------------------------------------------------------------------------------------------------------------------------------------------------------------------------------------------------|-------------|--------|------|----|----|----|-------|--------|
| XTC1-p13 | (P19338) Nucleolin (Protein C23)                                                                                                                                                                                                                     | NUCL_HUMAN  | 76467  | 100% | 4  | 4  | 7  | 0.01% | 8.18%  |
| XTC1-p13 | (P19440) Gamma-glutamyltranspeptidase 1 precursor (EC 2.3.2.2) (Gamma-glutamyltransferase 1) (CD224 antigen) [Contains: Gamma-glutamyltranspeptidase 1 heavy chain; Gamma-glutamyltranspeptidase 1 light chain]                                      | GGT1_HUMAN  | 61393  | 100% | 2  | 2  | 2  | 0.00% | 5.10%  |
| XTC1-p13 | (P20591) Interferon-induced GTP-binding protein Mx1 (Interferon-regulated resistance GTP-binding protein MxA) (Interferon-induced protein p78) (IFI-78K)                                                                                             | MX1_HUMAN   | 75387  | 100% | 4  | 4  | 6  | 0.01% | 10.40% |
| XTC1-p13 | (P20618) Proteasome subunit beta type 1 (EC 3.4.25.1) (Proteasome component C5) (Macropain subunit C5) (Multicatalytic endopeptidase complex subunit C5) (Proteasome gamma chain)                                                                    | PSB1_HUMAN  | 26473  | 100% | 9  | 10 | 45 | 0.08% | 53.50% |
| XTC1-p13 | (P20674) Cytochrome c oxidase polypeptide Va, mitochondrial precursor (EC 1.9.3.1)                                                                                                                                                                   | COX5A_HUMAN | 16757  | 100% | 2  | 2  | 4  | 0.01% | 30.00% |
| XTC1-p13 | (P20810) Calpastatin (Calpain inhibitor) (Sperm BS-17 component)                                                                                                                                                                                     | ICAL_HUMAN  | 76485  | 100% | 2  | 2  | 2  | 0.00% | 4.52%  |
| XTC1-p13 | (P20908) Collagen alpha-1(V) chain precursor                                                                                                                                                                                                         | CO5A1_HUMAN | 183545 | 100% | 5  | 5  | 7  | 0.01% | 4.84%  |
| XTC1-p13 | (P20933) N(4)-(beta-N-acetylglucosaminy)-L-asparaginase precursor (EC 3.5.1.26) (Glycosylasparaginase) (Aspartylglucosaminidase) (N4-(N-acetyl-beta-glucosaminy)-L-asparagine amidase) (AGA) [Contains: Glycosylasparaginase alpha chain; Glycosyl   | ASPG_HUMAN  | 37176  | 100% | 3  | 3  | 10 | 0.02% | 17.10% |
| XTC1-p13 | (P21333) Filamin-A (Alpha-filamin) (Filamin-1) (Endothelial actin-binding protein) (Actin-binding protein 280) (ABP-280) (Nonmuscle filamin)                                                                                                         | FLNA_HUMAN  | 280602 | 100% | 10 | 10 | 38 | 0.07% | 7.22%  |
| XTC1-p13 | (P21589) 5'-nucleotidase precursor (EC 3.1.3.5) (Ecto-5'-nucleotidase) (5'-NT) (CD73 antigen)                                                                                                                                                        | 5NTD_HUMAN  | 63351  | 100% | 3  | 3  | 5  | 0.01% | 11.00% |
| XTC1-p13 | (P21926) CD9 antigen (p24) (Leukocyte antigen MIC3) (Motility-related protein) (MRP-1) (Tetraspanin 29) (Tspan-29)                                                                                                                                   | CD9_HUMAN   | 25268  | 100% | 2  | 2  | 8  | 0.01% | 15.40% |
| XTC1-p13 | (P22307) Nonspecific lipid-transfer protein (EC 2.3.1.176) (Propanoyl-CoA C-acyltransferase) (NSLTP) (Sterol carrier protein 2) (SCP-2) (Sterol carrier protein X) (SCP-X) (SCP-chi) (SCPX)                                                          | NLTP_HUMAN  | 58977  | 100% | 3  | 3  | 16 | 0.03% | 6.22%  |
| XTC1-p13 | (P22314) Ubiquitin-activating enzyme E1 (A1S9 protein)                                                                                                                                                                                               | UBE1_HUMAN  | 117832 | 100% | 5  | 5  | 8  | 0.01% | 7.84%  |
| XTC1-p13 | (P22392) Nucleoside diphosphate kinase B (EC 2.7.4.6) (NDK B) (NDP kinase B) (nm23-H2) (C-myc purine-binding transcription factor PUF)                                                                                                               | NDKB_HUMAN  | 17280  | 100% | 7  | 10 | 54 | 0.09% | 53.90% |
| XTC1-p13 | (P22626) Heterogeneous nuclear ribonucleoproteins A2/B1 (hnRNP A2 / hnRNP B1)                                                                                                                                                                        | ROA2_HUMAN  | 37412  | 100% | 5  | 5  | 19 | 0.03% | 29.50% |
| XTC1-p13 | (P23246) Splicing factor, proline- and glutamine-rich (Polypyrimidine tract-binding protein-associated splicing factor) (PTB-associated splicing factor) (PSF) (DNA-binding p52/p100 complex, 100 kDa subunit) (100-kDa DNA-pairing protein) (hPOMp) | SFPQ_HUMAN  | 76132  | 100% | 2  | 2  | 3  | 0.01% | 5.52%  |

## Protein Identified Sequence Coverage in XTC-1

|          |                                                                                                                                                                                                                                                      |             |        |      |    |    |    |       |        |
|----------|------------------------------------------------------------------------------------------------------------------------------------------------------------------------------------------------------------------------------------------------------|-------------|--------|------|----|----|----|-------|--------|
| XTC1-p13 | (P23284) Peptidyl-prolyl cis-trans isomerase B precursor (EC 5.2.1.8) (PPIase) (Rotamase) (Cyclophilin B) (S-cyclophilin) (SCYLP) (CYP-S1)                                                                                                           | PPIB_HUMAN  | 22725  | 100% | 3  | 3  | 11 | 0.02% | 16.80% |
| XTC1-p13 | (P23396) 40S ribosomal protein S3                                                                                                                                                                                                                    | RS3_HUMAN   | 26671  | 100% | 2  | 2  | 2  | 0.00% | 14.40% |
| XTC1-p13 | (P23470) Receptor-type tyrosine-protein phosphatase gamma precursor (EC 3.1.3.48) (Protein-tyrosine phosphatase gamma) (R-PTP-gamma)                                                                                                                 | PTPRG_HUMAN | 162042 | 100% | 2  | 2  | 2  | 0.00% | 2.42%  |
| XTC1-p13 | (P23528) Cofilin-1 (Cofilin, non-muscle isoform) (18 kDa phosphoprotein) (p18)                                                                                                                                                                       | COF1_HUMAN  | 18354  | 100% | 4  | 5  | 24 | 0.04% | 35.80% |
| XTC1-p13 | (P25705) ATP synthase alpha chain, mitochondrial precursor (EC 3.6.3.14)                                                                                                                                                                             | ATPA_HUMAN  | 59734  | 100% | 2  | 2  | 2  | 0.00% | 5.06%  |
| XTC1-p13 | (P25788) Proteasome subunit alpha type 3 (EC 3.4.25.1) (Proteasome component C8) (Macropain subunit C8) (Multicatalytic endopeptidase complex subunit C8)                                                                                            | PSA3_HUMAN  | 28285  | 100% | 3  | 3  | 4  | 0.01% | 13.00% |
| XTC1-p13 | (P26006) Integrin alpha-3 precursor (Galactoprotein B3) (GAPB3) (VLA-3 alpha chain) (FRP-2) (CD49c antigen) [Contains: Integrin alpha-3 heavy chain; Integrin alpha-3 light chain]                                                                   | ITA3_HUMAN  | 118682 | 100% | 6  | 6  | 9  | 0.02% | 7.22%  |
| XTC1-p13 | (P26038) Moesin (Membrane-organizing extension spike protein)                                                                                                                                                                                        | MOES_HUMAN  | 67673  | 100% | 12 | 13 | 40 | 0.07% | 23.40% |
| XTC1-p13 | (P26599) Polypyrimidine tract-binding protein 1 (PTB) (Heterogeneous nuclear ribonucleoprotein I) (hnRNP I) (57 kDa RNA-binding protein PPTB-1)                                                                                                      | PTBP1_HUMAN | 57205  | 100% | 2  | 2  | 3  | 0.01% | 5.84%  |
| XTC1-p13 | (P26641) Elongation factor 1-gamma (EF-1-gamma) (eEF-1B gamma)                                                                                                                                                                                       | EF1G_HUMAN  | 49970  | 100% | 3  | 3  | 5  | 0.01% | 8.49%  |
| XTC1-p13 | (P26885) FK506-binding protein 2 precursor (EC 5.2.1.8) (Peptidyl-prolyl cis-trans isomerase) (PPIase) (Rotamase) (13 kDa FKBP) (FKBP-13)                                                                                                            | FKBP2_HUMAN | 15632  | 100% | 3  | 3  | 7  | 0.01% | 38.00% |
| XTC1-p13 | (P27348) 14-3-3 protein theta (14-3-3 protein tau) (14-3-3 protein T-cell) (HS1 protein)                                                                                                                                                             | 1433T_HUMAN | 27747  | 100% | 5  | 6  | 14 | 0.02% | 26.90% |
| XTC1-p13 | (P27487) Dipeptidyl peptidase 4 (EC 3.4.14.5) (Dipeptidyl peptidase IV) (DPP IV) (T-cell activation antigen CD26) (TP103) (Adenosine deaminase complexing protein 2) (ADABP) [Contains: Dipeptidyl peptidase 4 membrane form (Dipeptidyl peptidase   | DPP4_HUMAN  | 88263  | 100% | 9  | 10 | 26 | 0.05% | 14.40% |
| XTC1-p13 | (P27797) Calreticulin precursor (CRP55) (Calregulin) (HACBP) (ERp60) (grp60)                                                                                                                                                                         | CRTC_HUMAN  | 48125  | 100% | 10 | 12 | 44 | 0.08% | 44.10% |
| XTC1-p13 | (P27824) Calnexin precursor (Major histocompatibility complex class I antigen-binding protein p88) (p90) (IP90)                                                                                                                                      | CALX_HUMAN  | 67552  | 100% | 2  | 2  | 3  | 0.01% | 5.74%  |
| XTC1-p13 | (P28066) Proteasome subunit alpha type 5 (EC 3.4.25.1) (Proteasome zeta chain) (Macropain zeta chain) (Multicatalytic endopeptidase complex zeta chain)                                                                                              | PSA5_HUMAN  | 26393  | 100% | 2  | 2  | 2  | 0.00% | 14.10% |
| XTC1-p13 | (P28799) Granulins precursor (Proepithelin) (PEPI) [Contains: Acrogranin; Paragranulin; Granulin-1 (Granulin G); Granulin-2 (Granulin F); Granulin-3 (Granulin B); Granulin-4 (Granulin A); Granulin-5 (Granulin C); Granulin-6 (Granulin D); Granul | GRN_HUMAN   | 63522  | 100% | 6  | 6  | 16 | 0.03% | 16.20% |

## Protein Identified Sequence Coverage in XTC-1

|          |                                                                                                                                                                                                                                                    |                 |       |      |    |    |     |       |        |
|----------|----------------------------------------------------------------------------------------------------------------------------------------------------------------------------------------------------------------------------------------------------|-----------------|-------|------|----|----|-----|-------|--------|
| XTC1-p13 | (P29373) Cellular retinoic acid-binding protein 2 (Cellular retinoic acid-binding protein II) (CRABP-II) (Retinoic acid-binding protein II, cellular)                                                                                              | RABP2_HUMAN     | 15544 | 100% | 2  | 2  | 3   | 0.01% | 13.10% |
| XTC1-p13 | (P29401) Transketolase (EC 2.2.1.1) (TK)                                                                                                                                                                                                           | TKT_HUMAN       | 67861 | 100% | 3  | 3  | 3   | 0.01% | 9.15%  |
| XTC1-p13 | (P29966) Myristoylated alanine-rich C-kinase substrate (MARCKS) (Protein kinase C substrate, 80 kDa protein, light chain) (PKCSL) (80K-L protein)                                                                                                  | MARCS_HUMAN     | 31405 | 100% | 3  | 3  | 6   | 0.01% | 20.80% |
| XTC1-p13 | (P30040) Endoplasmic reticulum protein ERp29 precursor (ERp31) (ERp28)                                                                                                                                                                             | ERP29_HUMAN     | 28977 | 100% | 3  | 3  | 4   | 0.01% | 15.30% |
| XTC1-p13 | (P30041) Peroxiredoxin-6 (EC 1.11.1.15) (Antioxidant protein 2) (1-Cys peroxiredoxin) (1-Cys PRX) (Acidic calcium-independent phospholipase A2) (EC 3.1.1.-) (aiPLA2) (Non-selenium glutathione peroxidase) (EC 1.11.1.7) (NSGPx) (24 kDa protein) | PRDX6_HUMAN     | 24887 | 100% | 11 | 14 | 83  | 0.14% | 56.10% |
| XTC1-p13 | (P30044) Peroxiredoxin-5, mitochondrial precursor (EC 1.11.1.15) (Prx-V) (Peroxisomal antioxidant enzyme) (PLP) (Thioredoxin reductase) (Thioredoxin peroxidase PMP20) (Antioxidant enzyme B166) (AOEB166) (TPx type VI) (Liver tissue 2D-page spo | PRDX5_HUMAN     | 22008 | 100% | 8  | 10 | 39  | 0.07% | 55.10% |
| XTC1-p13 | (P30048) Thioredoxin-dependent peroxide reductase, mitochondrial precursor (EC 1.11.1.15) (Peroxiredoxin-3) (Antioxidant protein 1) (AOP-1) (MER5 protein homolog) (HBC189) (PRX III)                                                              | PRDX3_HUMAN     | 27675 | 100% | 3  | 3  | 13  | 0.02% | 14.50% |
| XTC1-p13 | (P30050) 60S ribosomal protein L12                                                                                                                                                                                                                 | RL12_HUMAN      | 17801 | 100% | 2  | 3  | 10  | 0.02% | 18.80% |
| XTC1-p13 | (P30101) Protein disulfide-isomerase A3 precursor (EC 5.3.4.1) (Disulfide isomerase ER-60) (ERp60) (58 kDa microsomal protein) (p58) (ERp57) (58 kDa glucose-regulated protein)                                                                    | PDIA3_HUMAN     | 56767 | 100% | 18 | 20 | 101 | 0.18% | 44.40% |
| XTC1-p13 | (P30447) HLA class I histocompatibility antigen, A-23 alpha chain precursor (MHC class I antigen A*23) (A-9)                                                                                                                                       | 1A23_HUMAN,1A24 | 40670 | 100% | 7  | 8  | 31  | 0.05% | 31.00% |
| XTC1-p13 | (P30481) HLA class I histocompatibility antigen, B-44 alpha chain precursor (MHC class I antigen B*44) (Bw-44)                                                                                                                                     | 1B44_HUMAN      | 40463 | 100% | 6  | 7  | 27  | 0.05% | 34.50% |
| XTC1-p13 | (P30504) HLA class I histocompatibility antigen, Cw-4 alpha chain precursor (MHC class I antigen Cw*4)                                                                                                                                             | 1C04_HUMAN      | 40977 | 100% | 2  | 2  | 2   | 0.00% | 17.20% |
| XTC1-p13 | (P31943) Heterogeneous nuclear ribonucleoprotein H (hnRNP H)                                                                                                                                                                                       | HNRH1_HUMAN     | 49081 | 100% | 4  | 4  | 7   | 0.01% | 13.40% |
| XTC1-p13 | (P31946) 14-3-3 protein beta/alpha (Protein kinase C inhibitor protein 1) (KCIP-1) (Protein 1054)                                                                                                                                                  | 1433B_HUMAN     | 27934 | 100% | 3  | 4  | 14  | 0.02% | 22.40% |
| XTC1-p13 | (P32119) Peroxiredoxin-2 (EC 1.11.1.15) (Thioredoxin peroxidase 1) (Thioredoxin-dependent peroxide reductase 1) (Thiol-specific antioxidant protein) (TSA) (PRP) (Natural killer cell-enhancing factor B) (NKEF-B)                                 | PRDX2_HUMAN     | 21743 | 100% | 7  | 8  | 59  | 0.10% | 45.70% |
| XTC1-p13 | (P32970) Tumor necrosis factor ligand superfamily member 7 (CD27 ligand) (CD27-L) (CD70 antigen)                                                                                                                                                   | TNFL7_HUMAN     | 21100 | 100% | 7  | 8  | 30  | 0.05% | 58.00% |



## Protein Identified Sequence Coverage in XTC-1

|          |                                                                                                                                                                                                                                                    |             |        |      |   |    |    |       |        |
|----------|----------------------------------------------------------------------------------------------------------------------------------------------------------------------------------------------------------------------------------------------------|-------------|--------|------|---|----|----|-------|--------|
| XTC1-p13 | (P34059) N-acetylgalactosamine-6-sulfatase precursor (EC 3.1.6.4) (N-acetylgalactosamine-6-sulfate sulfatase) (Galactose-6-sulfate sulfatase) (GalNAc6S sulfatase) (Chondroitinsulfatase) (Chondroitinase)                                         | GA6S_HUMAN  | 58009  | 100% | 9 | 9  | 28 | 0.05% | 22.60% |
| XTC1-p13 | (P34932) Heat shock 70 kDa protein 4 (Heat shock 70-related protein APG-2) (HSP70RY)                                                                                                                                                               | HSP74_HUMAN | 94283  | 100% | 3 | 3  | 4  | 0.01% | 7.98%  |
| XTC1-p13 | (P35052) Glypican-1 precursor                                                                                                                                                                                                                      | GPC1_HUMAN  | 61633  | 100% | 3 | 3  | 4  | 0.01% | 9.32%  |
| XTC1-p13 | (P35221) Alpha-1 catenin (Cadherin-associated protein) (Alpha E-catenin) (NY-REN-13 antigen)                                                                                                                                                       | CTN1_HUMAN  | 100055 | 100% | 6 | 7  | 13 | 0.02% | 12.80% |
| XTC1-p13 | (P35222) Beta-catenin                                                                                                                                                                                                                              | CTNB1_HUMAN | 85479  | 100% | 3 | 3  | 4  | 0.01% | 8.19%  |
| XTC1-p13 | (P35241) Radixin                                                                                                                                                                                                                                   | RADI_HUMAN  | 68548  | 100% | 3 | 4  | 7  | 0.01% | 13.00% |
| XTC1-p13 | (P35268) 60S ribosomal protein L22 (Epstein-Barr virus small RNA-associated protein) (EBER-associated protein) (EAP) (Heparin-binding protein HBp15)                                                                                               | RL22_HUMAN  | 14638  | 100% | 2 | 2  | 9  | 0.02% | 18.90% |
| XTC1-p13 | (P35527) Keratin, type I cytoskeletal 9 (Cytokeratin-9) (CK-9) (Keratin-9) (K9)                                                                                                                                                                    | K1C9_HUMAN  | 62113  | 100% | 3 | 4  | 6  | 0.01% | 10.90% |
| XTC1-p13 | (P35579) Myosin-9 (Myosin heavy chain, nonmuscle IIa) (Nonmuscle myosin heavy chain IIa) (NMMHC IIa) (NMMHC-IIA) (Cellular myosin heavy chain, type A) (Nonmuscle myosin heavy chain-A) (NMMHC-A)                                                  | MYH9_HUMAN  | 226388 | 100% | 8 | 9  | 18 | 0.03% | 7.86%  |
| XTC1-p13 | (P35613) Basigin precursor (Leukocyte activation antigen M6) (Collagenase stimulatory factor) (Extracellular matrix metalloproteinase inducer) (EMMPRIN) (5F7) (Tumor cell-derived collagenase stimulatory factor) (TCSF) (OK blood group antigen) | BASI_HUMAN  | 42182  | 100% | 8 | 9  | 31 | 0.05% | 34.80% |
| XTC1-p13 | (P35908) Keratin, type II cytoskeletal 2 epidermal (Cytokeratin-2e) (K2e) (CK 2e)                                                                                                                                                                  | K22E_HUMAN  | 65848  | 100% | 2 | 2  | 2  | 0.00% | 7.91%  |
| XTC1-p13 | (P36543) Vacuolar ATP synthase subunit E (EC 3.6.3.14) (V-ATPase E subunit) (Vacuolar proton pump E subunit) (V-ATPase 31 kDa subunit) (P31)                                                                                                       | VATE_HUMAN  | 26128  | 100% | 2 | 2  | 7  | 0.01% | 11.90% |
| XTC1-p13 | (P37108) Signal recognition particle 14 kDa protein (SRP14) (18 kDa Alu RNA-binding protein)                                                                                                                                                       | SRP14_HUMAN | 14527  | 100% | 2 | 2  | 5  | 0.01% | 31.60% |
| XTC1-p13 | (P37802) Transgelin-2 (SM22-alpha homolog)                                                                                                                                                                                                         | TAGL2_HUMAN | 22243  | 100% | 8 | 10 | 69 | 0.12% | 58.10% |
| XTC1-p13 | (P37837) Transaldolase (EC 2.2.1.2)                                                                                                                                                                                                                | TALDO_HUMAN | 37524  | 100% | 9 | 9  | 40 | 0.07% | 26.40% |
| XTC1-p13 | (P39023) 60S ribosomal protein L3 (HIV-1 TAR RNA binding protein B) (TARBP-B)                                                                                                                                                                      | RL3_HUMAN   | 45960  | 100% | 2 | 2  | 2  | 0.00% | 7.71%  |
| XTC1-p13 | (P40121) Macrophage capping protein (Actin-regulatory protein CAP-G)                                                                                                                                                                               | CAPG_HUMAN  | 38500  | 100% | 2 | 2  | 3  | 0.01% | 9.20%  |
| XTC1-p13 | (P40227) T-complex protein 1 subunit zeta (TCP-1-zeta) (CCT-zeta) (CCT-zeta-1) (Tcp20) (HTR3) (Acute morphine dependence-related protein 2)                                                                                                        | TCPZ_HUMAN  | 57876  | 100% | 2 | 3  | 8  | 0.01% | 7.17%  |
| XTC1-p13 | (P40925) Malate dehydrogenase, cytoplasmic (EC 1.1.1.37) (Cytosolic malate dehydrogenase)                                                                                                                                                          | MDHC_HUMAN  | 36278  | 100% | 5 | 5  | 13 | 0.02% | 20.10% |
| XTC1-p13 | (P41222) Prostaglandin-H2 D-isomerase precursor (EC 5.3.99.2) (Lipocalin-type prostaglandin-D synthase) (Glutathione-independent PGD synthetase) (Prostaglandin-D2 synthase) (PGD2 synthase) (PGDS2) (PGDS) (Beta-trace protein) (Cerebrin-28)     | PTGDS_HUMAN | 21011  | 100% | 4 | 4  | 14 | 0.02% | 34.70% |

## Protein Identified Sequence Coverage in XTC-1

|          |                                                                                                                                                                                                                                                     |                 |        |      |    |    |    |       |        |
|----------|-----------------------------------------------------------------------------------------------------------------------------------------------------------------------------------------------------------------------------------------------------|-----------------|--------|------|----|----|----|-------|--------|
| XTC1-p13 | (P43121) Cell surface glycoprotein MUC18 precursor (Melanoma-associated antigen MUC18) (Melanoma cell adhesion molecule) (Melanoma-associated antigen A32) (S-endo 1 endothelial-associated antigen) (Cell surface glycoprotein P1H12) (CD146 anti  | MUC18_HUMAN     | 71589  | 100% | 2  | 2  | 2  | 0.00% | 6.97%  |
| XTC1-p13 | (P43490) Nicotinamide phosphoribosyltransferase (EC 2.4.2.12) (NAMPRase) (Nampt) (Pre-B cell-enhancing factor) (Pre-B-cell colony-enhancing factor 1) (Visfatin)                                                                                    | NAMPT_HUMAN     | 55505  | 100% | 16 | 20 | 71 | 0.12% | 49.30% |
| XTC1-p13 | (P46379) Large proline-rich protein BAT3 (HLA-B-associated transcript 3) (Protein G3)                                                                                                                                                               | BAT3_HUMAN      | 119389 | 100% | 4  | 4  | 6  | 0.01% | 5.21%  |
| XTC1-p13 | (P46782) 40S ribosomal protein S5                                                                                                                                                                                                                   | RS5_HUMAN       | 22728  | 100% | 2  | 2  | 3  | 0.01% | 17.20% |
| XTC1-p13 | (P46821) Microtubule-associated protein 1B (MAP1B) [Contains: MAP1 light chain LC1]                                                                                                                                                                 | MAP1B_HUMAN     | 270602 | 100% | 4  | 4  | 6  | 0.01% | 2.96%  |
| XTC1-p13 | (P46940) Ras GTPase-activating-like protein IQGAP1 (p195)                                                                                                                                                                                           | IQGA1_HUMAN     | 189241 | 100% | 13 | 14 | 22 | 0.04% | 15.10% |
| XTC1-p13 | (P46976) Glycogenin-1 (EC 2.4.1.186)                                                                                                                                                                                                                | GLYG_HUMAN      | 39235  | 100% | 2  | 2  | 8  | 0.01% | 4.30%  |
| XTC1-p13 | (P47755) F-actin capping protein alpha-2 subunit (CapZ alpha-2)                                                                                                                                                                                     | CAZA2_HUMAN     | 32800  | 100% | 4  | 5  | 7  | 0.01% | 22.10% |
| XTC1-p13 | (P48643) T-complex protein 1 subunit epsilon (TCP-1-epsilon) (CCT-epsilon)                                                                                                                                                                          | TCPE_HUMAN      | 59654  | 100% | 7  | 7  | 10 | 0.02% | 30.70% |
| XTC1-p13 | (P48960) CD97 antigen precursor (Leukocyte antigen CD97)                                                                                                                                                                                            | CD97_HUMAN      | 91852  | 100% | 5  | 5  | 9  | 0.02% | 10.70% |
| XTC1-p13 | (P49327) Fatty acid synthase (EC 2.3.1.85) [Includes: [Acyl-carrier-protein] S-acetyltransferase (EC 2.3.1.38); [Acyl-carrier-protein] S-malonyltransferase (EC 2.3.1.39); 3-oxoacyl-[acyl-carrier-protein] synthase (EC 2.3.1.41); 3-oxoacyl-acyl- | FAS_HUMAN       | 273382 | 100% | 3  | 3  | 3  | 0.01% | 2.59%  |
| XTC1-p13 | (P49366) Deoxyhypusine synthase (EC 2.5.1.46) (DHS)                                                                                                                                                                                                 | DHYS_HUMAN      | 40953  | 100% | 6  | 7  | 17 | 0.03% | 28.70% |
| XTC1-p13 | (P50454) Collagen-binding protein 2 precursor (Colligin 2) (Rheumatoid arthritis-related antigen RA-A47) (Serpin H2)                                                                                                                                | SPH2_HUMAN      | 46424  | 100% | 10 | 12 | 50 | 0.09% | 29.70% |
| XTC1-p13 | (P50502) Hsc70-interacting protein (Hip) (Suppression of tumorigenicity protein 13) (Putative tumor suppressor ST13) (Protein FAM10A1) (Progesterone receptor-associated p48 protein) (NY-REN-33 antigen)                                           | F10A1_HUMAN,F10 | 27390  | 100% | 2  | 2  | 2  | 0.00% | 11.20% |
| XTC1-p13 | (P50895) Lutheran blood group glycoprotein precursor (B-CAM cell surface glycoprotein) (Auberger B antigen) (F8/G253 antigen)                                                                                                                       | LU_HUMAN        | 67386  | 100% | 2  | 2  | 4  | 0.01% | 6.37%  |
| XTC1-p13 | (P50897) Palmitoyl-protein thioesterase 1 precursor (EC 3.1.2.22) (Palmitoyl-protein hydrolase 1)                                                                                                                                                   | PPT1_HUMAN      | 34176  | 100% | 5  | 5  | 12 | 0.02% | 26.80% |
| XTC1-p13 | (P51665) 26S proteasome non-ATPase regulatory subunit 7 (26S proteasome regulatory subunit rpn8) (26S proteasome regulatory subunit S12) (Proteasome subunit p40) (Mov34 protein homolog)                                                           | PSD7_HUMAN      | 37008  | 100% | 4  | 4  | 9  | 0.02% | 22.50% |
| XTC1-p13 | (P51688) N-sulphoglucosamine sulphohydrolase precursor (EC 3.10.1.1) (Sulfoglucosamine sulfamidase) (Sulphamidase)                                                                                                                                  | SPHM_HUMAN      | 56678  | 100% | 7  | 7  | 34 | 0.06% | 23.90% |

## Protein Identified Sequence Coverage in XTC-1

|          |                                                                                                                                                                                                                                                      |                |       |      |    |    |     |       |        |
|----------|------------------------------------------------------------------------------------------------------------------------------------------------------------------------------------------------------------------------------------------------------|----------------|-------|------|----|----|-----|-------|--------|
| XTC1-p13 | (P52272) Heterogeneous nuclear ribonucleoprotein M (hnRNP M)                                                                                                                                                                                         | HNRPM_HUMAN    | 77368 | 100% | 4  | 4  | 10  | 0.02% | 9.88%  |
| XTC1-p13 | (P52907) F-actin capping protein alpha-1 subunit (CapZ alpha-1)                                                                                                                                                                                      | CAZA1_HUMAN    | 32774 | 100% | 2  | 2  | 4   | 0.01% | 18.90% |
| XTC1-p13 | (P53365) Arfaptin-2 (ADP-ribosylation factor-interacting protein 2) (Partner of RAC1) (POR1 protein)                                                                                                                                                 | ARFP2_HUMAN    | 37839 | 100% | 3  | 3  | 7   | 0.01% | 10.90% |
| XTC1-p13 | (P53367) Arfaptin-1 (ADP-ribosylation factor-interacting protein 1)                                                                                                                                                                                  | ARFP1_HUMAN    | 41722 | 100% | 4  | 4  | 14  | 0.02% | 16.40% |
| XTC1-p13 | (P53634) Dipeptidyl-peptidase 1 precursor (EC 3.4.14.1) (Dipeptidyl-peptidase I) (DPP-I) (DPPI) (Cathepsin C) (Cathepsin J) (Dipeptidyl transferase) [Contains: Dipeptidyl-peptidase 1 exclusion domain chain (Dipeptidyl-peptidase I exclusion dom  | CATC_HUMAN     | 51824 | 100% | 9  | 13 | 67  | 0.12% | 40.00% |
| XTC1-p13 | (P53999) Activated RNA polymerase II transcriptional coactivator p15 (SUB1 homolog) (Positive cofactor 4) (PC4) (p14)                                                                                                                                | TCP4_HUMAN     | 14247 | 100% | 3  | 3  | 16  | 0.03% | 26.20% |
| XTC1-p13 | (P54577) Tyrosyl-tRNA synthetase, cytoplasmic (EC 6.1.1.1) (Tyrosyl-tRNA ligase) (TyrRS)                                                                                                                                                             | SYYC_HUMAN     | 58996 | 100% | 6  | 6  | 13  | 0.02% | 15.20% |
| XTC1-p13 | (P55145) ARMET protein precursor (Arginine-rich protein)                                                                                                                                                                                             | ARMET_HUMAN    | 20240 | 100% | 3  | 3  | 6   | 0.01% | 17.30% |
| XTC1-p13 | (P55327) Tumor protein D52 (N8 protein)                                                                                                                                                                                                              | TPD52_HUMAN    | 19845 | 100% | 7  | 8  | 59  | 0.10% | 64.10% |
| XTC1-p13 | (P59998) Actin-related protein 2/3 complex subunit 4 (ARP2/3 complex 20 kDa subunit) (p20-ARC)                                                                                                                                                       | ARPC4_HUMAN    | 19518 | 100% | 3  | 3  | 7   | 0.01% | 18.00% |
| XTC1-p13 | (P60174) Triosephosphate isomerase (EC 5.3.1.1) (TIM) (Triose-phosphate isomerase)                                                                                                                                                                   | TPIS_HUMAN     | 26520 | 100% | 6  | 6  | 27  | 0.05% | 38.70% |
| XTC1-p13 | (P60660) Myosin light polypeptide 6 (Smooth muscle and nonmuscle myosin light chain alkali 6) (Myosin light chain alkali 3) (Myosin light chain 3) (MLC-3) (LC17)                                                                                    | MYL6_HUMAN     | 16781 | 100% | 5  | 6  | 15  | 0.03% | 41.30% |
| XTC1-p13 | (P60709) Actin, cytoplasmic 1 (Beta-actin)                                                                                                                                                                                                           | ACTB_HUMAN,ACT | 41776 | 100% | 17 | 24 | 261 | 0.45% | 55.70% |
| XTC1-p13 | (P60903) Protein S100-A10 (S100 calcium-binding protein A10) (Calpactin-1 light chain) (Calpactin I light chain) (p10 protein) (p11) (Cellular ligand of annexin II)                                                                                 | S10AA_HUMAN    | 11054 | 100% | 2  | 3  | 8   | 0.01% | 28.10% |
| XTC1-p13 | (P61026) Ras-related protein Rab-10                                                                                                                                                                                                                  | RAB10_HUMAN    | 22524 | 100% | 2  | 2  | 4   | 0.01% | 11.00% |
| XTC1-p13 | (P61088) Ubiquitin-conjugating enzyme E2 N (EC 6.3.2.19) (Ubiquitin-protein ligase N) (Ubiquitin carrier protein N) (Ubc13) (Bendless-like ubiquitin-conjugating enzyme)                                                                             | UBE2N_HUMAN    | 17121 | 100% | 4  | 5  | 12  | 0.02% | 36.80% |
| XTC1-p13 | (P61289) Proteasome activator complex subunit 3 (Proteasome activator 28-gamma subunit) (PA28gamma) (PA28g) (Activator of multicatalytic protease subunit 3) (11S regulator complex gamma subunit) (REG-gamma) (Ki nuclear autoantigen)              | PSME3_HUMAN    | 29489 | 100% | 2  | 2  | 4   | 0.01% | 11.80% |
| XTC1-p13 | (P61457) Pterin-4-alpha-carbinolamine dehydratase (EC 4.2.1.96) (PHS) (4-alpha-hydroxy-tetrahydropterin dehydratase) (Phenylalanine hydroxylase-stimulating protein) (Pterin carbinolamine dehydratase) (PCD) (Dimerization cofactor of hepatocyte n | PHS_HUMAN      | 11851 | 100% | 2  | 2  | 4   | 0.01% | 25.20% |

## Protein Identified Sequence Coverage in XTC-1

|          |                                                                                                                                                                                                                                                      |                |       |      |    |    |    |       |        |
|----------|------------------------------------------------------------------------------------------------------------------------------------------------------------------------------------------------------------------------------------------------------|----------------|-------|------|----|----|----|-------|--------|
| XTC1-p13 | (P61604) 10 kDa heat shock protein, mitochondrial (Hsp10) (10 kDa chaperonin) (CPN10) (Early-pregnancy factor) (EPF)                                                                                                                                 | CH10_HUMAN     | 10783 | 100% | 2  | 2  | 2  | 0.00% | 25.70% |
| XTC1-p13 | (P61758) Prefoldin subunit 3 (Von Hippel-Lindau-binding protein 1) (VHL-binding protein 1) (VBP-1) (HIBBJ46)                                                                                                                                         | PFD3_HUMAN     | 22609 | 100% | 2  | 2  | 3  | 0.01% | 12.70% |
| XTC1-p13 | (P61769) Beta-2-microglobulin precursor [Contains: Beta-2-microglobulin variant pl 5.3]                                                                                                                                                              | B2MG_HUMAN     | 13697 | 100% | 2  | 2  | 6  | 0.01% | 26.90% |
| XTC1-p13 | (P61916) Epididymal secretory protein E1 precursor (Niemann-Pick disease type C2 protein) (hE1)                                                                                                                                                      | NPC2_HUMAN     | 16552 | 100% | 9  | 11 | 47 | 0.08% | 74.20% |
| XTC1-p13 | (P61978) Heterogeneous nuclear ribonucleoprotein K (hnRNP K) (Transformation up-regulated nuclear protein) (TUNP)                                                                                                                                    | HNRPK_HUMAN    | 50961 | 100% | 4  | 5  | 12 | 0.02% | 15.30% |
| XTC1-p13 | (P61981) 14-3-3 protein gamma (Protein kinase C inhibitor protein 1) (KCIP-1)                                                                                                                                                                        | 1433G_HUMAN    | 28154 | 100% | 3  | 4  | 10 | 0.02% | 17.50% |
| XTC1-p13 | (P62158) Calmodulin (CaM)                                                                                                                                                                                                                            | CALM_HUMAN     | 16689 | 100% | 2  | 3  | 6  | 0.01% | 25.70% |
| XTC1-p13 | (P62166) Neuronal calcium sensor 1 (NCS-1) (Frequenin homolog) (Frequenin-like protein) (Frequenin-like ubiquitous protein)                                                                                                                          | NCS1_HUMAN     | 21730 | 100% | 2  | 2  | 4  | 0.01% | 14.80% |
| XTC1-p13 | (P62191) 26S protease regulatory subunit 4 (P26s4) (Proteasome 26S subunit ATPase 1)                                                                                                                                                                 | PRS4_HUMAN     | 49168 | 100% | 4  | 4  | 6  | 0.01% | 13.90% |
| XTC1-p13 | (P62241) 40S ribosomal protein S8                                                                                                                                                                                                                    | RS8_HUMAN      | 24057 | 100% | 2  | 2  | 4  | 0.01% | 13.50% |
| XTC1-p13 | (P62258) 14-3-3 protein epsilon (14-3-3E)                                                                                                                                                                                                            | 1433E_HUMAN    | 29157 | 100% | 8  | 9  | 44 | 0.08% | 48.20% |
| XTC1-p13 | (P62750) 60S ribosomal protein L23a                                                                                                                                                                                                                  | RL23A_HUMAN    | 17678 | 100% | 2  | 2  | 3  | 0.01% | 15.40% |
| XTC1-p13 | (P62805) Histone H4                                                                                                                                                                                                                                  | H4_HUMAN       | 11219 | 100% | 7  | 8  | 62 | 0.11% | 52.90% |
| XTC1-p13 | (P62888) 60S ribosomal protein L30                                                                                                                                                                                                                   | RL30_HUMAN     | 12636 | 100% | 2  | 2  | 8  | 0.01% | 24.60% |
| XTC1-p13 | (P62937) Peptidyl-prolyl cis-trans isomerase A (EC 5.2.1.8) (PPIase A) (Rotamase A) (Cyclophilin A) (Cyclosporin A-binding protein)                                                                                                                  | PPIA_HUMAN     | 17864 | 100% | 10 | 11 | 60 | 0.10% | 65.90% |
| XTC1-p13 | (P62942) FK506-binding protein 1A (EC 5.2.1.8) (Peptidyl-prolyl cis-trans isomerase) (PPIase) (Rotamase) (12 kDa FKBP) (FKBP-12) (Immunophilin FKBP12)                                                                                               | FKB1A_HUMAN    | 11802 | 100% | 2  | 2  | 7  | 0.01% | 25.20% |
| XTC1-p13 | (P62988) Ubiquitin                                                                                                                                                                                                                                   | UBIQ_HUMAN     | 8547  | 100% | 3  | 3  | 19 | 0.03% | 44.70% |
| XTC1-p13 | (P63104) 14-3-3 protein zeta/delta (Protein kinase C inhibitor protein 1) (KCIP-1)                                                                                                                                                                   | 1433Z_HUMAN    | 27728 | 100% | 7  | 10 | 50 | 0.09% | 44.10% |
| XTC1-p13 | (P63208) S-phase kinase-associated protein 1A (Cyclin A/CDK2-associated protein p19) (p19A) (p19skp1) (RNA polymerase II elongation factor-like protein) (Organ of Corti protein 2) (OCP-II protein) (OCP-2) (Transcription elongation factor B) (S) | SKP1_HUMAN     | 18509 | 100% | 2  | 3  | 3  | 0.01% | 29.00% |
| XTC1-p13 | (P63241) Eukaryotic translation initiation factor 5A-1 (eIF-5A-1) (eIF-5A1) (Eukaryotic initiation factor 5A isoform 1) (eIF-5A) (eIF-4D) (Rev-binding factor)                                                                                       | IF5A1_HUMAN    | 16684 | 100% | 3  | 4  | 7  | 0.01% | 23.50% |
| XTC1-p13 | (P67936) Tropomyosin alpha-4 chain (Tropomyosin-4) (TM30p1)                                                                                                                                                                                          | TPM4_HUMAN     | 28373 | 100% | 9  | 9  | 23 | 0.04% | 27.90% |
| XTC1-p13 | (P68032) Actin, alpha cardiac (Alpha-cardiac actin)                                                                                                                                                                                                  | ACTC_HUMAN,ACT | 42034 | 100% | 2  | 3  | 10 | 0.02% | 33.70% |
| XTC1-p13 | (P68036) Ubiquitin-conjugating enzyme E2 L3 (EC 6.3.2.19) (Ubiquitin-protein ligase L3) (Ubiquitin carrier protein L3) (UbcH7) (E2-F1) (L-UBC)                                                                                                       | UB2L3_HUMAN    | 17844 | 100% | 2  | 2  | 4  | 0.01% | 24.00% |

## Protein Identified Sequence Coverage in XTC-1

|          |                                                                                                                                                                                                                                                     |                |        |      |    |    |    |       |        |
|----------|-----------------------------------------------------------------------------------------------------------------------------------------------------------------------------------------------------------------------------------------------------|----------------|--------|------|----|----|----|-------|--------|
| XTC1-p13 | (P68104) Elongation factor 1-alpha 1 (EF-1-alpha-1) (Elongation factor 1 A-1) (eEF1A-1) (Elongation factor Tu) (EF-Tu)                                                                                                                              | EF1A1_HUMAN    | 50123  | 100% | 10 | 14 | 89 | 0.16% | 43.50% |
| XTC1-p13 | (P68363) Tubulin alpha-ubiquitous chain (Alpha-tubulin ubiquitous) (Tubulin K-alpha-1)                                                                                                                                                              | TBAK_HUMAN     | 50134  | 100% | 14 | 17 | 86 | 0.15% | 47.90% |
| XTC1-p13 | (P68371) Tubulin beta-2C chain (Tubulin beta-2 chain)                                                                                                                                                                                               | TBB2C_HUMAN    | 49813  | 100% | 5  | 5  | 32 | 0.06% | 58.20% |
| XTC1-p13 | (P68431) Histone H3.1 (H3/a) (H3/b) (H3/c) (H3/d) (H3/f) (H3/h) (H3/i) (H3/j) (H3/k) (H3/l)                                                                                                                                                         | H31_HUMAN      | 15256  | 100% | 3  | 3  | 7  | 0.01% | 29.60% |
| XTC1-p13 | (P78371) T-complex protein 1 subunit beta (TCP-1-beta) (CCT-beta)                                                                                                                                                                                   | TCPB_HUMAN     | 57341  | 100% | 7  | 8  | 30 | 0.05% | 22.80% |
| XTC1-p13 | (P78417) Glutathione transferase omega-1 (EC 2.5.1.18) (GSTO 1-1)                                                                                                                                                                                   | GSTO1_HUMAN    | 27549  | 100% | 4  | 5  | 17 | 0.03% | 21.20% |
| XTC1-p13 | (P84077) ADP-ribosylation factor 1                                                                                                                                                                                                                  | ARF1_HUMAN,ARF | 20453  | 100% | 6  | 6  | 10 | 0.02% | 49.40% |
| XTC1-p13 | (P84103) Splicing factor, arginine/serine-rich 3 (Pre-mRNA-splicing factor SRP20)                                                                                                                                                                   | SFRS3_HUMAN    | 19312  | 100% | 3  | 3  | 10 | 0.02% | 21.30% |
| XTC1-p13 | (Q00610) Clathrin heavy chain 1 (CLH-17)                                                                                                                                                                                                            | CLH1_HUMAN     | 191470 | 100% | 2  | 2  | 2  | 0.00% | 2.69%  |
| XTC1-p13 | (Q00839) Heterogenous nuclear ribonucleoprotein U (hnRNP U) (Scaffold attachment factor A) (SAF-A) (p120) (pp120)                                                                                                                                   | HNRPU_HUMAN    | 90331  | 100% | 2  | 2  | 3  | 0.01% | 4.50%  |
| XTC1-p13 | (Q01105) Protein SET (Phosphatase 2A inhibitor I2PP2A) (I-2PP2A) (Template-activating factor I) (TAF-I) (HLA-DR-associated protein II) (PHAPII) (Inhibitor of granzyme A-activated DNase) (IGAAD)                                                   | SET_HUMAN      | 33471  | 100% | 2  | 2  | 2  | 0.00% | 7.93%  |
| XTC1-p13 | (Q01469) Fatty acid-binding protein, epidermal (E-FABP) (Psoriasis-associated fatty acid-binding protein homolog) (PA-FABP)                                                                                                                         | FABPE_HUMAN    | 15015  | 100% | 2  | 2  | 6  | 0.01% | 18.70% |
| XTC1-p13 | (Q01518) Adenylyl cyclase-associated protein 1 (CAP 1)                                                                                                                                                                                              | CAP1_HUMAN     | 51524  | 100% | 9  | 10 | 36 | 0.06% | 35.70% |
| XTC1-p13 | (Q02083) N-acylethanolamine-hydrolyzing acid amidase precursor (EC 3.5.1.-) (N-acylsphingosine amidohydrolase-like) (ASAH-like protein) (Acid ceramidase-like protein)                                                                              | ASAHL_HUMAN    | 40015  | 100% | 2  | 2  | 6  | 0.01% | 7.52%  |
| XTC1-p13 | (Q04637) Eukaryotic translation initiation factor 4 gamma 1 (eIF-4-gamma 1) (eIF-4G1) (eIF-4G 1) (p220)                                                                                                                                             | IF4G1_HUMAN    | 175520 | 100% | 2  | 2  | 5  | 0.01% | 2.00%  |
| XTC1-p13 | (Q05639) Elongation factor 1-alpha 2 (EF-1-alpha-2) (Elongation factor 1 A-2) (eEF1A-2) (Statin S1)                                                                                                                                                 | EF1A2_HUMAN    | 50453  | 100% | 5  | 7  | 22 | 0.04% | 43.40% |
| XTC1-p13 | (Q06323) Proteasome activator complex subunit 1 (Proteasome activator 28-alpha subunit) (PA28alpha) (PA28a) (Activator of multicatalytic protease subunit 1) (11S regulator complex alpha subunit) (REG-alpha) (Interferon gamma up-regulated I-51) | PSME1_HUMAN    | 28706  | 100% | 12 | 14 | 91 | 0.16% | 40.20% |
| XTC1-p13 | (Q06830) Peroxiredoxin-1 (EC 1.11.1.15) (Thioredoxin peroxidase 2) (Thioredoxin-dependent peroxide reductase 2) (Proliferation-associated protein PAG) (Natural killer cell-enhancing factor A) (NKEF-A)                                            | PRDX1_HUMAN    | 22093  | 100% | 10 | 10 | 46 | 0.08% | 53.30% |
| XTC1-p13 | (Q07020) 60S ribosomal protein L18                                                                                                                                                                                                                  | RL18_HUMAN     | 21486  | 100% | 2  | 2  | 3  | 0.01% | 13.90% |
| XTC1-p13 | (Q07812) Apoptosis regulator BAX, membrane isoform alpha                                                                                                                                                                                            | BAXA_HUMAN,BAX | 24203  | 100% | 2  | 2  | 3  | 0.01% | 15.10% |

## Protein Identified Sequence Coverage in XTC-1

|          |                                                                                                                                                                                                                                                     |             |        |      |    |    |     |       |        |
|----------|-----------------------------------------------------------------------------------------------------------------------------------------------------------------------------------------------------------------------------------------------------|-------------|--------|------|----|----|-----|-------|--------|
| XTC1-p13 | (Q07954) Low-density lipoprotein receptor-related protein 1 precursor (LRP) (Alpha-2-macroglobulin receptor) (A2MR) (Apolipoprotein E receptor) (APOER) (CD91 antigen)                                                                              | LRP1_HUMAN  | 504543 | 100% | 2  | 2  | 3   | 0.01% | 0.59%  |
| XTC1-p13 | (Q08380) Galectin-3-binding protein precursor (Lectin galactoside-binding soluble 3-binding protein) (Mac-2-binding protein) (Mac-2 BP) (MAC2BP) (Tumor-associated antigen 90K)                                                                     | LG3BP_HUMAN | 65314  | 100% | 17 | 24 | 100 | 0.17% | 38.30% |
| XTC1-p13 | (Q09666) Neuroblast differentiation-associated protein AHNAK (Desmoyokin) (Fragments)                                                                                                                                                               | AHNAK_HUMAN | 312479 | 100% | 9  | 9  | 26  | 0.05% | 4.97%  |
| XTC1-p13 | (Q10588) ADP-ribosyl cyclase 2 precursor (EC 3.2.2.5) (Cyclic ADP-ribose hydrolase 2) (cADPr hydrolase 2) (Bone marrow stromal antigen 1) (BST-1) (CD157 antigen)                                                                                   | BST1_HUMAN  | 35721  | 100% | 3  | 3  | 3   | 0.01% | 17.00% |
| XTC1-p13 | (Q12906) Interleukin enhancer-binding factor 3 (Nuclear factor of activated T-cells 90 kDa) (NF-AT-90) (Double-stranded RNA-binding protein 76) (DRBP76) (Translational control protein 80) (TCP80) (Nuclear factor associated with dsRNA) (NFAR) ( | ILF3_HUMAN  | 95321  | 100% | 3  | 3  | 7   | 0.01% | 6.15%  |
| XTC1-p13 | (Q13200) 26S proteasome non-ATPase regulatory subunit 2 (26S proteasome regulatory subunit RPN1) (26S proteasome regulatory subunit S2) (26S proteasome subunit p97) (Tumor necrosis factor type 1 receptor-associated protein 2) (55.11 protein)   | PSD2_HUMAN  | 100184 | 100% | 3  | 3  | 4   | 0.01% | 7.38%  |
| XTC1-p13 | (Q13510) Acid ceramidase precursor (EC 3.5.1.23) (Acylsphingosine deacylase) (N-acylsphingosine amidohydrolase) (AC) (Putative 32 kDa heart protein) (PHP32) [Contains: Acid ceramidase alpha subunit; Acid ceramidase beta subunit]                | ASAH1_HUMAN | 44633  | 100% | 13 | 14 | 46  | 0.08% | 39.00% |
| XTC1-p13 | (Q13561) Dynactin subunit 2 (Dynactin complex 50 kDa subunit) (50 kDa dynein-associated polypeptide) (p50 dynamitin) (DCTN-50)                                                                                                                      | DCTN2_HUMAN | 44083  | 100% | 12 | 13 | 61  | 0.11% | 43.80% |
| XTC1-p13 | (Q13641) Trophoblast glycoprotein precursor (5T4 oncofetal trophoblast glycoprotein) (5T4 oncotrophoblast glycoprotein) (5T4 oncofetal antigen) (M6P1)                                                                                              | TPBG_HUMAN  | 46015  | 100% | 3  | 4  | 7   | 0.01% | 11.00% |
| XTC1-p13 | (Q13740) CD166 antigen precursor (Activated leukocyte-cell adhesion molecule) (ALCAM)                                                                                                                                                               | CD166_HUMAN | 65116  | 100% | 9  | 10 | 26  | 0.05% | 27.40% |
| XTC1-p13 | (Q13813) Spectrin alpha chain, brain (Spectrin, non-erythroid alpha chain) (Alpha-II spectrin) (Fodrin alpha chain)                                                                                                                                 | SPTA2_HUMAN | 284525 | 100% | 8  | 10 | 14  | 0.02% | 6.39%  |
| XTC1-p13 | (Q14103) Heterogeneous nuclear ribonucleoprotein D0 (hnRNP D0) (AU-rich element RNA-binding protein 1)                                                                                                                                              | HNRPD_HUMAN | 38417  | 100% | 3  | 3  | 7   | 0.01% | 12.70% |
| XTC1-p13 | (Q14126) Desmoglein-2 precursor (HDGC)                                                                                                                                                                                                              | DSG2_HUMAN  | 122367 | 100% | 7  | 7  | 11  | 0.02% | 11.80% |
| XTC1-p13 | (Q14247) Src substrate cortactin (Amplixin) (Oncogene EMS1)                                                                                                                                                                                         | SRC8_HUMAN  | 61617  | 100% | 3  | 3  | 4   | 0.01% | 11.10% |
| XTC1-p13 | (Q14498) RNA-binding region-containing protein 2 (Hepatocellular carcinoma protein 1) (Splicing factor HCC1)                                                                                                                                        | RNPC2_HUMAN | 59363  | 100% | 2  | 2  | 2   | 0.00% | 8.49%  |

## Protein Identified Sequence Coverage in XTC-1

|          |                                                                                                                                                                                                                             |                |        |      |   |   |    |       |        |
|----------|-----------------------------------------------------------------------------------------------------------------------------------------------------------------------------------------------------------------------------|----------------|--------|------|---|---|----|-------|--------|
| XTC1-p13 | (Q14508) WAP four-disulfide core domain protein 2 precursor (Major epididymis-specific protein E4) (Epididymal secretory protein E4) (Putative protease inhibitor WAP5)                                                     | WFDC2_HUMAN    | 12974  | 100% | 3 | 4 | 17 | 0.03% | 48.40% |
| XTC1-p13 | (Q15056) Eukaryotic translation initiation factor 4H (eIF-4H) (Williams-Beuren syndrome chromosome region 1 protein)                                                                                                        | IF4H_HUMAN     | 27237  | 100% | 2 | 2 | 3  | 0.01% | 17.00% |
| XTC1-p13 | (Q15084) Protein disulfide-isomerase A6 precursor (EC 5.3.4.1) (Protein disulfide isomerase P5) (Thioredoxin domain-containing protein 7)                                                                                   | PDIA6_HUMAN    | 48104  | 100% | 8 | 9 | 34 | 0.06% | 35.70% |
| XTC1-p13 | (Q15233) Non-POU domain-containing octamer-binding protein (NonO protein) (54 kDa nuclear RNA- and DNA-binding protein) (p54(nrb)) (p54nrb) (55 kDa nuclear protein) (NMT55) (DNA-binding p52/p100 complex, 52 kDa subunit) | NONO_HUMAN     | 54214  | 100% | 2 | 3 | 4  | 0.01% | 9.55%  |
| XTC1-p13 | (Q15262) Receptor-type tyrosine-protein phosphatase kappa precursor (EC 3.1.3.48) (Protein-tyrosine phosphatase kappa) (R-PTP-kappa)                                                                                        | PTPRK_HUMAN    | 162071 | 100% | 2 | 2 | 2  | 0.00% | 2.08%  |
| XTC1-p13 | (Q15293) Reticulocalbin-1 precursor                                                                                                                                                                                         | RCN1_HUMAN     | 38873  | 100% | 7 | 8 | 21 | 0.04% | 32.30% |
| XTC1-p13 | (Q15417) Calponin-3 (Calponin, acidic isoform)                                                                                                                                                                              | CNN3_HUMAN     | 36397  | 100% | 4 | 4 | 13 | 0.02% | 24.60% |
| XTC1-p13 | (Q15758) Neutral amino acid transporter B(0) (ATB(0)) (Sodium-dependent neutral amino acid transporter type 2) (RD114/simian type D retrovirus receptor) (Baboon M7 virus receptor)                                         | AAAT_HUMAN     | 56582  | 100% | 2 | 2 | 2  | 0.00% | 6.10%  |
| XTC1-p13 | (Q15907) Ras-related protein Rab-11B (GTP-binding protein YPT3)                                                                                                                                                             | RB11B_HUMAN    | 24340  | 100% | 4 | 4 | 6  | 0.01% | 25.80% |
| XTC1-p13 | (Q16270) Insulin-like growth factor-binding protein 7 precursor (IGFBP-7) (IBP-7) (IGF-binding protein 7) (MAC25 protein) (Prostacyclin-stimulating factor) (PGI2-stimulating factor) (IGFBP-rP1)                           | IBP7_HUMAN     | 29112  | 100% | 4 | 4 | 9  | 0.02% | 21.30% |
| XTC1-p13 | (Q16698) 2,4-dienoyl-CoA reductase, mitochondrial precursor (EC 1.3.1.34) (2,4-dienoyl-CoA reductase [NADPH]) (4-enoyl-CoA reductase [NADPH])                                                                               | DECR_HUMAN     | 36051  | 100% | 3 | 3 | 3  | 0.01% | 11.90% |
| XTC1-p13 | (Q5ZPR3) CD276 antigen precursor (Costimulatory molecule) (B7 homolog 3) (B7-H3) (4lg-B7-H3)                                                                                                                                | CD276_HUMAN    | 57216  | 100% | 3 | 3 | 9  | 0.02% | 10.50% |
| XTC1-p13 | (Q6EMK4) Vasorin precursor (Protein Slit-like 2)                                                                                                                                                                            | VASN_HUMAN     | 71696  | 100% | 7 | 7 | 19 | 0.03% | 15.20% |
| XTC1-p13 | (Q6F13) Histone H2A type 2-A (H2A.2)                                                                                                                                                                                        | H2A2A_HUMAN,H2 | 13947  | 100% | 2 | 4 | 15 | 0.03% | 49.60% |
| XTC1-p13 | (Q6NZI2) Polymerase I and transcript release factor (PTRF protein)                                                                                                                                                          | PTRF_HUMAN     | 43459  | 100% | 3 | 3 | 7  | 0.01% | 12.80% |
| XTC1-p13 | (Q71UM5) 40S ribosomal protein S27-like protein                                                                                                                                                                             | RS27L_HUMAN,RS | 9312   | 100% | 2 | 2 | 5  | 0.01% | 25.30% |
| XTC1-p13 | (Q86UP2) Kinectin (Kinesin receptor) (CG-1 antigen)                                                                                                                                                                         | KTN1_HUMAN     | 156258 | 100% | 3 | 3 | 3  | 0.01% | 2.65%  |
| XTC1-p13 | (Q8IWA5) Choline transporter-like protein 2 (Solute carrier family 44 member 2)                                                                                                                                             | CTL2_HUMAN     | 80138  | 100% | 2 | 2 | 10 | 0.02% | 3.54%  |
| XTC1-p13 | (Q8IYB3) Serine/arginine repetitive matrix protein 1 (Ser/Arg-related nuclear matrix protein) (SR-related nuclear matrix protein of 160 kDa) (SRm160)                                                                       | SRRM1_HUMAN    | 102319 | 100% | 3 | 3 | 3  | 0.01% | 6.97%  |
| XTC1-p13 | (Q8I郑9) G-protein coupled receptor 64 precursor (Epididymis-specific protein 6) (He6 receptor)                                                                                                                              | GPR64_HUMAN    | 111476 | 100% | 3 | 3 | 6  | 0.01% | 5.11%  |

## Protein Identified Sequence Coverage in XTC-1

|          |                                                                                                                                                                                             |             |        |      |    |    |    |       |        |
|----------|---------------------------------------------------------------------------------------------------------------------------------------------------------------------------------------------|-------------|--------|------|----|----|----|-------|--------|
| XTC1-p13 | (Q8NB7J) Sulfatase-modifying factor 2 precursor (C-alpha-formylglycine-generating enzyme 2)                                                                                                 | SUMF2_HUMAN | 33839  | 100% | 2  | 2  | 7  | 0.01% | 8.31%  |
| XTC1-p13 | (Q8NCC3) 1-O-acylceramide synthase precursor (EC 2.3.1.-) (ACS) (Lysosomal phospholipase A2) (Lysophospholipase 3) (LPLA2) (LCAT-like lysophospholipase) (LLPL)                             | LYPA3_HUMAN | 46641  | 100% | 6  | 6  | 19 | 0.03% | 23.30% |
| XTC1-p13 | (Q8NFFJ) Retinoic acid-induced protein 3 (G-protein coupled receptor family C group 5 member A) (Retinoic acid-induced gene 1 protein) (RAIG-1) (Orphan G-protein coupling receptor PEIG-1) | RAI3_HUMAN  | 40235  | 100% | 2  | 2  | 13 | 0.02% | 13.40% |
| XTC1-p13 | (Q92485) Acid sphingomyelinase-like phosphodiesterase 3b precursor (EC 3.1.4.-) (ASM-like phosphodiesterase 3b)                                                                             | ASM3B_HUMAN | 50796  | 100% | 4  | 5  | 15 | 0.03% | 13.80% |
| XTC1-p13 | (Q92520) Protein FAM3C precursor (Protein GS3786)                                                                                                                                           | FAM3C_HUMAN | 24663  | 100% | 2  | 2  | 3  | 0.01% | 15.40% |
| XTC1-p13 | (Q92820) Gamma-glutamyl hydrolase precursor (EC 3.4.19.9) (Gamma-Glu-X carboxypeptidase) (Conjugase) (GH)                                                                                   | GGH_HUMAN   | 35948  | 100% | 9  | 11 | 77 | 0.13% | 35.20% |
| XTC1-p13 | (Q92896) Golgi apparatus protein 1 precursor (Golgi sialoglycoprotein MG-160) (E-selectin ligand 1) (ESL1) (Cysteine-rich fibroblast growth factor receptor) (CFR-1)                        | GSLG1_HUMAN | 134577 | 100% | 4  | 4  | 7  | 0.01% | 5.94%  |
| XTC1-p13 | (Q93079) Histone H2B.j (H2B/j)                                                                                                                                                              | H2BJ_HUMAN  | 13743  | 100% | 2  | 2  | 34 | 0.06% | 20.00% |
| XTC1-p13 | (Q96AG4) Leucine-rich repeat-containing protein 59                                                                                                                                          | LRC59_HUMAN | 34913  | 100% | 3  | 3  | 6  | 0.01% | 14.00% |
| XTC1-p13 | (Q96AY3) FK506-binding protein 10 precursor (EC 5.2.1.8) (Peptidyl-prolyl cis-trans isomerase) (PPIase) (Rotamase) (65 kDa FK506-binding protein) (FKBP65) (Immunophilin FKBP65)            | FKB10_HUMAN | 64228  | 100% | 4  | 5  | 5  | 0.01% | 12.00% |
| XTC1-p13 | (Q96D15) Reticulocalbin-3 precursor (EF-hand calcium-binding protein RLP49)                                                                                                                 | RCN3_HUMAN  | 37475  | 100% | 2  | 2  | 5  | 0.01% | 8.23%  |
| XTC1-p13 | (Q96HE7) ERO1-like protein alpha precursor (EC 1.8.4.-) (ERO1-Lalpha) (Oxidoreductin-1-Lalpha) (Endoplasmic oxidoreductin-1-like protein) (ERO1-L)                                          | ERO1A_HUMAN | 54377  | 100% | 6  | 6  | 7  | 0.01% | 19.90% |
| XTC1-p13 | (Q96TA1) Niban-like protein (Meg-3)                                                                                                                                                         | NIBL_HUMAN  | 82666  | 100% | 3  | 3  | 5  | 0.01% | 6.55%  |
| XTC1-p13 | (Q99417) C-Myc-binding protein (Associate of Myc 1) (AMY-1)                                                                                                                                 | MYCBP_HUMAN | 11818  | 100% | 2  | 2  | 7  | 0.01% | 36.30% |
| XTC1-p13 | (Q99497) Protein DJ-1 (Oncogene DJ1)                                                                                                                                                        | PARK7_HUMAN | 19873  | 100% | 2  | 2  | 4  | 0.01% | 21.70% |
| XTC1-p13 | (Q99519) Sialidase-1 precursor (EC 3.2.1.18) (Lysosomal sialidase) (N-acetyl-alpha-neuraminidase 1) (Acetylneuraminyl hydrolase) (G9 sialidase)                                             | NEUR1_HUMAN | 45449  | 100% | 12 | 14 | 47 | 0.08% | 45.50% |
| XTC1-p13 | (Q99536) Synaptic vesicle membrane protein VAT-1 homolog (EC 1.-.-.-)                                                                                                                       | VAT1_HUMAN  | 41902  | 100% | 5  | 5  | 11 | 0.02% | 24.90% |
| XTC1-p13 | (Q99538) Legumain precursor (EC 3.4.22.34) (Asparaginyl endopeptidase) (Protease, cysteine 1)                                                                                               | LGMN_HUMAN  | 49393  | 100% | 3  | 3  | 10 | 0.02% | 9.70%  |
| XTC1-p13 | (Q99733) Nucleosome assembly protein 1-like 4 (Nucleosome assembly protein 2) (NAP2)                                                                                                        | NP1L4_HUMAN | 42806  | 100% | 3  | 3  | 3  | 0.01% | 14.70% |
| XTC1-p13 | (Q99832) T-complex protein 1 subunit eta (TCP-1-eta) (CCT-eta) (HIV-1 Nef-interacting protein)                                                                                              | TCPH_HUMAN  | 59350  | 100% | 3  | 3  | 8  | 0.01% | 9.21%  |



## Protein Identified Sequence Coverage in XTC-1

|          |                                                                                                                                                                                                            |             |        |      |    |    |    |       |        |
|----------|------------------------------------------------------------------------------------------------------------------------------------------------------------------------------------------------------------|-------------|--------|------|----|----|----|-------|--------|
| XTC1-p13 | (Q9BRK5) 45 kDa calcium-binding protein precursor (Cab45) (Stromal cell-derived factor 4) (SDF-4)                                                                                                          | CAB45_HUMAN | 41789  | 100% | 6  | 8  | 17 | 0.03% | 31.50% |
| XTC1-p13 | (Q9BUL8) Programmed cell death protein 10 (TF-1 cell apoptosis-related protein 15) (Cerebral cavernous malformations 3 protein)                                                                            | PDC10_HUMAN | 24685  | 100% | 4  | 4  | 8  | 0.01% | 27.80% |
| XTC1-p13 | (Q9H3G5) Probable serine carboxypeptidase CPVL precursor (EC 3.4.16.-) (Carboxypeptidase, vitellogenic-like) (Vitellogenic carboxypeptidase-like protein) (VCP-like protein) (HVLP)                        | CPVL_HUMAN  | 54148  | 100% | 4  | 4  | 12 | 0.02% | 9.87%  |
| XTC1-p13 | (Q9HAT2) Sialate O-acetyltransferase precursor (EC 3.1.1.53) (Sialic acid-specific 9-O-acetyltransferase) (H-Lse)                                                                                          | SIAE_HUMAN  | 58297  | 100% | 12 | 14 | 65 | 0.11% | 34.40% |
| XTC1-p13 | (Q9NVD7) Alpha-parvin (Calponin-like integrin-linked kinase-binding protein) (CH-ILKBP)                                                                                                                    | PARVA_HUMAN | 42227  | 100% | 2  | 2  | 4  | 0.01% | 7.53%  |
| XTC1-p13 | (Q9P2E9) Ribosome-binding protein 1 (Ribosome receptor protein) (180 kDa ribosome receptor homolog) (ES/130-related protein)                                                                               | RRBP1_HUMAN | 152453 | 100% | 4  | 4  | 5  | 0.01% | 3.48%  |
| XTC1-p13 | (Q9UBG0) Macrophage mannose receptor 2 precursor (Urokinase receptor-associated protein) (Endocytic receptor 180) (CD280 antigen)                                                                          | MRC2_HUMAN  | 166637 | 100% | 10 | 10 | 31 | 0.05% | 12.00% |
| XTC1-p13 | (Q9UBR2) Cathepsin Z precursor (EC 3.4.22.-) (Cathepsin X) (Cathepsin P)                                                                                                                                   | CATZ_HUMAN  | 33850  | 100% | 6  | 8  | 69 | 0.12% | 24.80% |
| XTC1-p13 | (Q9UHL4) Dipeptidyl-peptidase 2 precursor (EC 3.4.14.2) (Dipeptidyl-peptidase II) (DPP II) (Dipeptidyl aminopeptidase II) (Quiescent cell proline dipeptidase) (Dipeptidyl peptidase 7)                    | DPP2_HUMAN  | 54311  | 100% | 10 | 14 | 49 | 0.09% | 33.90% |
| XTC1-p13 | (Q9UL46) Proteasome activator complex subunit 2 (Proteasome activator 28-beta subunit) (PA28beta) (PA28b) (Activator of multicatalytic protease subunit 2) (11S regulator complex beta subunit) (REG-beta) | PSME2_HUMAN | 27213  | 100% | 8  | 11 | 54 | 0.09% | 49.20% |
| XTC1-p13 | (Q9UM22) Mammalian ependymin-related protein 1 precursor (MERP-1) (UCC1 protein)                                                                                                                           | EPDR1_HUMAN | 25420  | 100% | 5  | 5  | 43 | 0.07% | 23.70% |
| XTC1-p13 | (Q9UMF0) Intercellular adhesion molecule 5 precursor (ICAM-5) (Telencephalin)                                                                                                                              | ICAM5_HUMAN | 97311  | 100% | 2  | 2  | 2  | 0.00% | 4.87%  |
| XTC1-p13 | (Q9UMR5) Palmitoyl-protein thioesterase 2 precursor (EC 3.1.2.22) (Palmitoyl-protein hydrolase 2) (PPT-2) (G14)                                                                                            | PPT2_HUMAN  | 34291  | 100% | 2  | 3  | 8  | 0.01% | 7.95%  |
| XTC1-p13 | (Q9UQ80) Proliferation-associated protein 2G4 (Cell cycle protein p38-2G4 homolog) (hG4-1) (ErbB3-binding protein 1)                                                                                       | PA2G4_HUMAN | 43638  | 100% | 2  | 2  | 3  | 0.01% | 6.11%  |
| XTC1-p13 | (Q9Y224) Protein C14orf166                                                                                                                                                                                 | CN166_HUMAN | 28051  | 100% | 8  | 9  | 36 | 0.06% | 43.40% |
| XTC1-p13 | (Q9Y2B0) MIR-interacting saposin-like protein precursor (Transmembrane protein 4) (Putative secreted protein ZSIG9)                                                                                        | MSAP_HUMAN  | 20635  | 100% | 5  | 6  | 26 | 0.05% | 44.00% |
| XTC1-p13 | (Q9Y2E5) Epididymis-specific alpha-mannosidase precursor (EC 3.2.1.24) (Mannosidase alpha class 2B member 2)                                                                                               | MA2B2_HUMAN | 113870 | 100% | 10 | 11 | 27 | 0.05% | 17.30% |
| XTC1-p13 | (Q9Y383) Putative RNA-binding protein Luc7-like 2                                                                                                                                                          | LC7L2_HUMAN | 46497  | 100% | 3  | 3  | 5  | 0.01% | 9.18%  |
| XTC1-p13 | (Q9Y490) Talin-1                                                                                                                                                                                           | TLN1_HUMAN  | 269747 | 100% | 8  | 9  | 11 | 0.02% | 6.14%  |

## Protein Identified Sequence Coverage in XTC-1

|          |                                                                                                                                                       |             |        |      |    |    |    |       |        |
|----------|-------------------------------------------------------------------------------------------------------------------------------------------------------|-------------|--------|------|----|----|----|-------|--------|
| XTC1-p13 | (Q9Y4L1) 150 kDa oxygen-regulated protein precursor (Orp150) (Hypoxia up-regulated 1)                                                                 | OXR_P_HUMAN | 111319 | 100% | 10 | 11 | 27 | 0.05% | 15.50% |
| XTC1-p13 | (Q9Y5X3) Sorting nexin-5                                                                                                                              | SNX5_HUMAN  | 46800  | 100% | 2  | 2  | 3  | 0.01% | 6.44%  |
| XTC1-p29 | (O00115) Deoxyribonuclease-2-alpha precursor (EC 3.1.22.1) (Deoxyribonuclease II alpha) (DNase II alpha) (Acid DNase) (Lysosomal DNase II) (R31240_2) | DNS2A_HUMAN | 39563  | 100% | 3  | 4  | 6  | 0.06% | 24.20% |
| XTC1-p29 | (O00115) Deoxyribonuclease-2-alpha precursor (EC 3.1.22.1) (Deoxyribonuclease II alpha) (DNase II alpha) (Acid DNase) (Lysosomal DNase II) (R31240_2) | DNS2A_HUMAN | 39563  | 100% | 4  | 4  | 4  | 0.04% | 27.50% |
| XTC1-p29 | (O00115) Deoxyribonuclease-2-alpha precursor (EC 3.1.22.1) (Deoxyribonuclease II alpha) (DNase II alpha) (Acid DNase) (Lysosomal DNase II) (R31240_2) | DNS2A_HUMAN | 39563  | 100% | 4  | 4  | 10 | 0.09% | 27.50% |
| XTC1-p29 | (O00115) Deoxyribonuclease-2-alpha precursor (EC 3.1.22.1) (Deoxyribonuclease II alpha) (DNase II alpha) (Acid DNase) (Lysosomal DNase II) (R31240_2) | DNS2A_HUMAN | 39563  | 100% | 3  | 3  | 6  | 0.06% | 24.20% |
| XTC1-p29 | (O00115) Deoxyribonuclease-2-alpha precursor (EC 3.1.22.1) (Deoxyribonuclease II alpha) (DNase II alpha) (Acid DNase) (Lysosomal DNase II) (R31240_2) | DNS2A_HUMAN | 39563  | 100% | 3  | 3  | 5  | 0.05% | 10.00% |
| XTC1-p29 | (O00115) Deoxyribonuclease-2-alpha precursor (EC 3.1.22.1) (Deoxyribonuclease II alpha) (DNase II alpha) (Acid DNase) (Lysosomal DNase II) (R31240_2) | DNS2A_HUMAN | 39563  | 100% | 3  | 3  | 6  | 0.06% | 10.00% |
| XTC1-p29 | (O00115) Deoxyribonuclease-2-alpha precursor (EC 3.1.22.1) (Deoxyribonuclease II alpha) (DNase II alpha) (Acid DNase) (Lysosomal DNase II) (R31240_2) | DNS2A_HUMAN | 39563  | 100% | 2  | 2  | 3  | 0.03% | 7.22%  |
| XTC1-p29 | (O00115) Deoxyribonuclease-2-alpha precursor (EC 3.1.22.1) (Deoxyribonuclease II alpha) (DNase II alpha) (Acid DNase) (Lysosomal DNase II) (R31240_2) | DNS2A_HUMAN | 39563  | 100% | 4  | 4  | 9  | 0.08% | 11.90% |
| XTC1-p29 | (O00115) Deoxyribonuclease-2-alpha precursor (EC 3.1.22.1) (Deoxyribonuclease II alpha) (DNase II alpha) (Acid DNase) (Lysosomal DNase II) (R31240_2) | DNS2A_HUMAN | 39563  | 100% | 3  | 3  | 6  | 0.05% | 10.00% |
| XTC1-p29 | (O00115) Deoxyribonuclease-2-alpha precursor (EC 3.1.22.1) (Deoxyribonuclease II alpha) (DNase II alpha) (Acid DNase) (Lysosomal DNase II) (R31240_2) | DNS2A_HUMAN | 39563  | 100% | 2  | 2  | 5  | 0.04% | 6.11%  |
| XTC1-p29 | (O00468) Agrin precursor                                                                                                                              | AGRN_HUMAN  | 214863 | 100% | 2  | 2  | 2  | 0.02% | 2.05%  |
| XTC1-p29 | (O00468) Agrin precursor                                                                                                                              | AGRN_HUMAN  | 214863 | 100% | 2  | 2  | 2  | 0.02% | 2.05%  |
| XTC1-p29 | (O00468) Agrin precursor                                                                                                                              | AGRN_HUMAN  | 214863 | 100% | 5  | 5  | 6  | 0.06% | 3.47%  |
| XTC1-p29 | (O00468) Agrin precursor                                                                                                                              | AGRN_HUMAN  | 214863 | 100% | 11 | 12 | 18 | 0.17% | 9.83%  |
| XTC1-p29 | (O00468) Agrin precursor                                                                                                                              | AGRN_HUMAN  | 214863 | 100% | 12 | 12 | 13 | 0.12% | 8.41%  |
| XTC1-p29 | (O00468) Agrin precursor                                                                                                                              | AGRN_HUMAN  | 214863 | 100% | 12 | 13 | 20 | 0.18% | 9.29%  |
| XTC1-p29 | (O00468) Agrin precursor                                                                                                                              | AGRN_HUMAN  | 214863 | 100% | 7  | 7  | 8  | 0.08% | 10.50% |
| XTC1-p29 | (O00468) Agrin precursor                                                                                                                              | AGRN_HUMAN  | 214863 | 100% | 7  | 7  | 7  | 0.06% | 8.70%  |
| XTC1-p29 | (O00468) Agrin precursor                                                                                                                              | AGRN_HUMAN  | 214863 | 100% | 2  | 2  | 3  | 0.03% | 2.15%  |
| XTC1-p29 | (O00468) Agrin precursor                                                                                                                              | AGRN_HUMAN  | 214863 | 100% | 4  | 4  | 4  | 0.03% | 2.25%  |
| XTC1-p29 | (O00468) Agrin precursor                                                                                                                              | AGRN_HUMAN  | 214863 | 100% | 4  | 5  | 10 | 0.09% | 6.55%  |
| XTC1-p29 | (O00468) Agrin precursor                                                                                                                              | AGRN_HUMAN  | 214863 | 100% | 3  | 3  | 4  | 0.04% | 4.79%  |

## Protein Identified Sequence Coverage in XTC-1

|          |                                                                                                                                                                                                                                                    |             |        |      |   |   |   |       |        |
|----------|----------------------------------------------------------------------------------------------------------------------------------------------------------------------------------------------------------------------------------------------------|-------------|--------|------|---|---|---|-------|--------|
| XTC1-p29 | (O00469) Procollagen-lysine,2-oxoglutarate 5-dioxygenase 2 precursor (EC 1.14.11.4) (Lysyl hydroxylase 2) (LH2)                                                                                                                                    | PLOD2_HUMAN | 84669  | 100% | 3 | 3 | 3 | 0.03% | 5.83%  |
| XTC1-p29 | (O00469) Procollagen-lysine,2-oxoglutarate 5-dioxygenase 2 precursor (EC 1.14.11.4) (Lysyl hydroxylase 2) (LH2)                                                                                                                                    | PLOD2_HUMAN | 84669  | 100% | 2 | 3 | 3 | 0.03% | 5.29%  |
| XTC1-p29 | (O00560) Syntenin-1 (Syndecan-binding protein 1) (Melanoma differentiation-associated protein 9) (MDA-9) (Scaffold protein Pbp1) (Pro-TGF-alpha cytoplasmic domain-interacting protein 18) (TACIP18)                                               | SDCB1_HUMAN | 32427  | 100% | 2 | 2 | 2 | 0.02% | 14.10% |
| XTC1-p29 | (O00584) Ribonuclease T2 precursor (EC 3.1.27.-) (Ribonuclease 6)                                                                                                                                                                                  | RNT2_HUMAN  | 29463  | 100% | 2 | 2 | 2 | 0.02% | 12.90% |
| XTC1-p29 | (O00622) Protein CYR61 precursor (Cysteine-rich, angiogenic inducer, 61) (Insulin-like growth factor-binding protein 10) (Protein GIG1)                                                                                                            | CYR61_HUMAN | 42008  | 100% | 2 | 2 | 2 | 0.02% | 12.60% |
| XTC1-p29 | (O00754) Lysosomal alpha-mannosidase precursor (EC 3.2.1.24) (Mannosidase, alpha B) (Lysosomal acid alpha-mannosidase) (Laman) (Mannosidase alpha class 2B member 1) [Contains: Lysosomal alpha-mannosidase A peptide; Lysosomal alpha-mannosidase | MA2B1_HUMAN | 113656 | 100% | 2 | 2 | 3 | 0.03% | 2.77%  |
| XTC1-p29 | (O00754) Lysosomal alpha-mannosidase precursor (EC 3.2.1.24) (Mannosidase, alpha B) (Lysosomal acid alpha-mannosidase) (Laman) (Mannosidase alpha class 2B member 1) [Contains: Lysosomal alpha-mannosidase A peptide; Lysosomal alpha-mannosidase | MA2B1_HUMAN | 113656 | 100% | 3 | 3 | 3 | 0.03% | 6.04%  |
| XTC1-p29 | (O00754) Lysosomal alpha-mannosidase precursor (EC 3.2.1.24) (Mannosidase, alpha B) (Lysosomal acid alpha-mannosidase) (Laman) (Mannosidase alpha class 2B member 1) [Contains: Lysosomal alpha-mannosidase A peptide; Lysosomal alpha-mannosidase | MA2B1_HUMAN | 113656 | 100% | 2 | 2 | 2 | 0.02% | 4.36%  |
| XTC1-p29 | (O00754) Lysosomal alpha-mannosidase precursor (EC 3.2.1.24) (Mannosidase, alpha B) (Lysosomal acid alpha-mannosidase) (Laman) (Mannosidase alpha class 2B member 1) [Contains: Lysosomal alpha-mannosidase A peptide; Lysosomal alpha-mannosidase | MA2B1_HUMAN | 113656 | 100% | 3 | 3 | 5 | 0.05% | 4.75%  |
| XTC1-p29 | (O00754) Lysosomal alpha-mannosidase precursor (EC 3.2.1.24) (Mannosidase, alpha B) (Lysosomal acid alpha-mannosidase) (Laman) (Mannosidase alpha class 2B member 1) [Contains: Lysosomal alpha-mannosidase A peptide; Lysosomal alpha-mannosidase | MA2B1_HUMAN | 113656 | 100% | 2 | 2 | 4 | 0.04% | 5.54%  |
| XTC1-p29 | (O00754) Lysosomal alpha-mannosidase precursor (EC 3.2.1.24) (Mannosidase, alpha B) (Lysosomal acid alpha-mannosidase) (Laman) (Mannosidase alpha class 2B member 1) [Contains: Lysosomal alpha-mannosidase A peptide; Lysosomal alpha-mannosidase | MA2B1_HUMAN | 113656 | 100% | 3 | 3 | 4 | 0.04% | 5.45%  |

## Protein Identified Sequence Coverage in XTC-1

|          |                                                                                                                                                                                                                                                    |             |        |      |   |   |   |       |       |
|----------|----------------------------------------------------------------------------------------------------------------------------------------------------------------------------------------------------------------------------------------------------|-------------|--------|------|---|---|---|-------|-------|
| XTC1-p29 | (O00754) Lysosomal alpha-mannosidase precursor (EC 3.2.1.24) (Mannosidase, alpha B) (Lysosomal acid alpha-mannosidase) (Laman) (Mannosidase alpha class 2B member 1) [Contains: Lysosomal alpha-mannosidase A peptide; Lysosomal alpha-mannosidase | MA2B1_HUMAN | 113656 | 100% | 4 | 4 | 7 | 0.06% | 6.73% |
| XTC1-p29 | (O00754) Lysosomal alpha-mannosidase precursor (EC 3.2.1.24) (Mannosidase, alpha B) (Lysosomal acid alpha-mannosidase) (Laman) (Mannosidase alpha class 2B member 1) [Contains: Lysosomal alpha-mannosidase A peptide; Lysosomal alpha-mannosidase | MA2B1_HUMAN | 113656 | 100% | 2 | 2 | 2 | 0.02% | 3.37% |
| XTC1-p29 | (O00754) Lysosomal alpha-mannosidase precursor (EC 3.2.1.24) (Mannosidase, alpha B) (Lysosomal acid alpha-mannosidase) (Laman) (Mannosidase alpha class 2B member 1) [Contains: Lysosomal alpha-mannosidase A peptide; Lysosomal alpha-mannosidase | MA2B1_HUMAN | 113656 | 100% | 5 | 6 | 6 | 0.05% | 7.62% |
| XTC1-p29 | (O00754) Lysosomal alpha-mannosidase precursor (EC 3.2.1.24) (Mannosidase, alpha B) (Lysosomal acid alpha-mannosidase) (Laman) (Mannosidase alpha class 2B member 1) [Contains: Lysosomal alpha-mannosidase A peptide; Lysosomal alpha-mannosidase | MA2B1_HUMAN | 113656 | 100% | 5 | 5 | 6 | 0.05% | 7.92% |
| XTC1-p29 | (O00754) Lysosomal alpha-mannosidase precursor (EC 3.2.1.24) (Mannosidase, alpha B) (Lysosomal acid alpha-mannosidase) (Laman) (Mannosidase alpha class 2B member 1) [Contains: Lysosomal alpha-mannosidase A peptide; Lysosomal alpha-mannosidase | MA2B1_HUMAN | 113656 | 100% | 2 | 2 | 3 | 0.03% | 4.36% |
| XTC1-p29 | (O00754) Lysosomal alpha-mannosidase precursor (EC 3.2.1.24) (Mannosidase, alpha B) (Lysosomal acid alpha-mannosidase) (Laman) (Mannosidase alpha class 2B member 1) [Contains: Lysosomal alpha-mannosidase A peptide; Lysosomal alpha-mannosidase | MA2B1_HUMAN | 113656 | 100% | 3 | 3 | 3 | 0.03% | 4.26% |
| XTC1-p29 | (O00754) Lysosomal alpha-mannosidase precursor (EC 3.2.1.24) (Mannosidase, alpha B) (Lysosomal acid alpha-mannosidase) (Laman) (Mannosidase alpha class 2B member 1) [Contains: Lysosomal alpha-mannosidase A peptide; Lysosomal alpha-mannosidase | MA2B1_HUMAN | 113656 | 100% | 3 | 4 | 7 | 0.06% | 5.64% |
| XTC1-p29 | (O00754) Lysosomal alpha-mannosidase precursor (EC 3.2.1.24) (Mannosidase, alpha B) (Lysosomal acid alpha-mannosidase) (Laman) (Mannosidase alpha class 2B member 1) [Contains: Lysosomal alpha-mannosidase A peptide; Lysosomal alpha-mannosidase | MA2B1_HUMAN | 113656 | 100% | 4 | 5 | 6 | 0.05% | 7.62% |
| XTC1-p29 | (O00754) Lysosomal alpha-mannosidase precursor (EC 3.2.1.24) (Mannosidase, alpha B) (Lysosomal acid alpha-mannosidase) (Laman) (Mannosidase alpha class 2B member 1) [Contains: Lysosomal alpha-mannosidase A peptide; Lysosomal alpha-mannosidase | MA2B1_HUMAN | 113656 | 100% | 2 | 2 | 4 | 0.03% | 5.45% |

## Protein Identified Sequence Coverage in XTC-1

|          |                                                                                                                                                                                                              |             |       |      |   |   |    |       |        |
|----------|--------------------------------------------------------------------------------------------------------------------------------------------------------------------------------------------------------------|-------------|-------|------|---|---|----|-------|--------|
| XTC1-p29 | (O14672) ADAM 10 precursor (EC 3.4.24.81) (A disintegrin and metalloproteinase domain 10) (Mammalian disintegrin-metalloprotease) (Kuzbanian protein homolog) (CDw156c antigen)                              | ADA10_HUMAN | 84125 | 100% | 3 | 3 | 3  | 0.03% | 5.61%  |
| XTC1-p29 | (O14672) ADAM 10 precursor (EC 3.4.24.81) (A disintegrin and metalloproteinase domain 10) (Mammalian disintegrin-metalloprotease) (Kuzbanian protein homolog) (CDw156c antigen)                              | ADA10_HUMAN | 84125 | 100% | 2 | 2 | 2  | 0.02% | 3.07%  |
| XTC1-p29 | (O14672) ADAM 10 precursor (EC 3.4.24.81) (A disintegrin and metalloproteinase domain 10) (Mammalian disintegrin-metalloprotease) (Kuzbanian protein homolog) (CDw156c antigen)                              | ADA10_HUMAN | 84125 | 100% | 2 | 2 | 3  | 0.03% | 3.07%  |
| XTC1-p29 | (O14672) ADAM 10 precursor (EC 3.4.24.81) (A disintegrin and metalloproteinase domain 10) (Mammalian disintegrin-metalloprotease) (Kuzbanian protein homolog) (CDw156c antigen)                              | ADA10_HUMAN | 84125 | 100% | 3 | 4 | 9  | 0.08% | 7.75%  |
| XTC1-p29 | (O14773) Tripeptidyl-peptidase 1 precursor (EC 3.4.14.9) (Tripeptidyl-peptidase I) (TPP-I) (Tripeptidyl aminopeptidase) (Lysosomal pepstatin insensitive protease) (LPIC) (Growth-inhibiting gene 1 protein) | TPP1_HUMAN  | 61230 | 100% | 2 | 3 | 6  | 0.06% | 9.95%  |
| XTC1-p29 | (O14773) Tripeptidyl-peptidase 1 precursor (EC 3.4.14.9) (Tripeptidyl-peptidase I) (TPP-I) (Tripeptidyl aminopeptidase) (Lysosomal pepstatin insensitive protease) (LPIC) (Growth-inhibiting gene 1 protein) | TPP1_HUMAN  | 61230 | 100% | 2 | 3 | 4  | 0.04% | 9.95%  |
| XTC1-p29 | (O14773) Tripeptidyl-peptidase 1 precursor (EC 3.4.14.9) (Tripeptidyl-peptidase I) (TPP-I) (Tripeptidyl aminopeptidase) (Lysosomal pepstatin insensitive protease) (LPIC) (Growth-inhibiting gene 1 protein) | TPP1_HUMAN  | 61230 | 100% | 2 | 3 | 11 | 0.10% | 5.86%  |
| XTC1-p29 | (O14773) Tripeptidyl-peptidase 1 precursor (EC 3.4.14.9) (Tripeptidyl-peptidase I) (TPP-I) (Tripeptidyl aminopeptidase) (Lysosomal pepstatin insensitive protease) (LPIC) (Growth-inhibiting gene 1 protein) | TPP1_HUMAN  | 61230 | 100% | 2 | 2 | 5  | 0.05% | 5.86%  |
| XTC1-p29 | (O14773) Tripeptidyl-peptidase 1 precursor (EC 3.4.14.9) (Tripeptidyl-peptidase I) (TPP-I) (Tripeptidyl aminopeptidase) (Lysosomal pepstatin insensitive protease) (LPIC) (Growth-inhibiting gene 1 protein) | TPP1_HUMAN  | 61230 | 100% | 2 | 2 | 8  | 0.08% | 9.95%  |
| XTC1-p29 | (O14773) Tripeptidyl-peptidase 1 precursor (EC 3.4.14.9) (Tripeptidyl-peptidase I) (TPP-I) (Tripeptidyl aminopeptidase) (Lysosomal pepstatin insensitive protease) (LPIC) (Growth-inhibiting gene 1 protein) | TPP1_HUMAN  | 61230 | 100% | 6 | 7 | 10 | 0.09% | 21.50% |
| XTC1-p29 | (O14773) Tripeptidyl-peptidase 1 precursor (EC 3.4.14.9) (Tripeptidyl-peptidase I) (TPP-I) (Tripeptidyl aminopeptidase) (Lysosomal pepstatin insensitive protease) (LPIC) (Growth-inhibiting gene 1 protein) | TPP1_HUMAN  | 61230 | 100% | 5 | 6 | 10 | 0.09% | 23.80% |

## Protein Identified Sequence Coverage in XTC-1

|          |                                                                                                                                                                                                              |             |        |      |   |   |    |       |        |
|----------|--------------------------------------------------------------------------------------------------------------------------------------------------------------------------------------------------------------|-------------|--------|------|---|---|----|-------|--------|
| XTC1-p29 | (O14773) Tripeptidyl-peptidase 1 precursor (EC 3.4.14.9) (Tripeptidyl-peptidase I) (TPP-I) (Tripeptidyl aminopeptidase) (Lysosomal pepstatin insensitive protease) (LPIC) (Growth-inhibiting gene 1 protein) | TPP1_HUMAN  | 61230  | 100% | 6 | 7 | 8  | 0.07% | 27.50% |
| XTC1-p29 | (O14773) Tripeptidyl-peptidase 1 precursor (EC 3.4.14.9) (Tripeptidyl-peptidase I) (TPP-I) (Tripeptidyl aminopeptidase) (Lysosomal pepstatin insensitive protease) (LPIC) (Growth-inhibiting gene 1 protein) | TPP1_HUMAN  | 61230  | 100% | 6 | 7 | 10 | 0.09% | 21.50% |
| XTC1-p29 | (O14773) Tripeptidyl-peptidase 1 precursor (EC 3.4.14.9) (Tripeptidyl-peptidase I) (TPP-I) (Tripeptidyl aminopeptidase) (Lysosomal pepstatin insensitive protease) (LPIC) (Growth-inhibiting gene 1 protein) | TPP1_HUMAN  | 61230  | 100% | 4 | 7 | 9  | 0.08% | 15.50% |
| XTC1-p29 | (O14773) Tripeptidyl-peptidase 1 precursor (EC 3.4.14.9) (Tripeptidyl-peptidase I) (TPP-I) (Tripeptidyl aminopeptidase) (Lysosomal pepstatin insensitive protease) (LPIC) (Growth-inhibiting gene 1 protein) | TPP1_HUMAN  | 61230  | 100% | 3 | 3 | 4  | 0.04% | 13.50% |
| XTC1-p29 | (O14773) Tripeptidyl-peptidase 1 precursor (EC 3.4.14.9) (Tripeptidyl-peptidase I) (TPP-I) (Tripeptidyl aminopeptidase) (Lysosomal pepstatin insensitive protease) (LPIC) (Growth-inhibiting gene 1 protein) | TPP1_HUMAN  | 61230  | 100% | 4 | 5 | 6  | 0.05% | 12.60% |
| XTC1-p29 | (O14773) Tripeptidyl-peptidase 1 precursor (EC 3.4.14.9) (Tripeptidyl-peptidase I) (TPP-I) (Tripeptidyl aminopeptidase) (Lysosomal pepstatin insensitive protease) (LPIC) (Growth-inhibiting gene 1 protein) | TPP1_HUMAN  | 61230  | 100% | 3 | 3 | 6  | 0.05% | 19.70% |
| XTC1-p29 | (O14773) Tripeptidyl-peptidase 1 precursor (EC 3.4.14.9) (Tripeptidyl-peptidase I) (TPP-I) (Tripeptidyl aminopeptidase) (Lysosomal pepstatin insensitive protease) (LPIC) (Growth-inhibiting gene 1 protein) | TPP1_HUMAN  | 61230  | 100% | 3 | 3 | 8  | 0.07% | 9.41%  |
| XTC1-p29 | (O14773) Tripeptidyl-peptidase 1 precursor (EC 3.4.14.9) (Tripeptidyl-peptidase I) (TPP-I) (Tripeptidyl aminopeptidase) (Lysosomal pepstatin insensitive protease) (LPIC) (Growth-inhibiting gene 1 protein) | TPP1_HUMAN  | 61230  | 100% | 2 | 2 | 2  | 0.02% | 6.75%  |
| XTC1-p29 | (O14773) Tripeptidyl-peptidase 1 precursor (EC 3.4.14.9) (Tripeptidyl-peptidase I) (TPP-I) (Tripeptidyl aminopeptidase) (Lysosomal pepstatin insensitive protease) (LPIC) (Growth-inhibiting gene 1 protein) | TPP1_HUMAN  | 61230  | 100% | 2 | 2 | 9  | 0.08% | 10.80% |
| XTC1-p29 | (O15031) Plexin-B2 precursor (MM1)                                                                                                                                                                           | PLXB2_HUMAN | 205081 | 100% | 2 | 2 | 2  | 0.02% | 2.23%  |
| XTC1-p29 | (O15031) Plexin-B2 precursor (MM1)                                                                                                                                                                           | PLXB2_HUMAN | 205081 | 100% | 2 | 2 | 2  | 0.02% | 2.29%  |
| XTC1-p29 | (O15031) Plexin-B2 precursor (MM1)                                                                                                                                                                           | PLXB2_HUMAN | 205081 | 100% | 2 | 2 | 2  | 0.02% | 2.67%  |
| XTC1-p29 | (O15031) Plexin-B2 precursor (MM1)                                                                                                                                                                           | PLXB2_HUMAN | 205081 | 100% | 2 | 2 | 2  | 0.02% | 4.41%  |
| XTC1-p29 | (O15230) Laminin alpha-5 chain precursor                                                                                                                                                                     | LAMA5_HUMAN | 399681 | 100% | 2 | 2 | 2  | 0.02% | 1.14%  |
| XTC1-p29 | (O15240) Neurosecretory protein VGF precursor                                                                                                                                                                | VGF_HUMAN   | 67269  | 100% | 2 | 2 | 4  | 0.03% | 5.68%  |
| XTC1-p29 | (O15446) RNA polymerase I-associated factor PAF49 (Anti-sense to ERCC-1 protein) (ASE-1) (CD3-epsilon-associated protein) (CD3E-associated protein) (CAST)                                                   | PAF49_HUMAN | 54968  | 100% | 2 | 2 | 2  | 0.02% | 12.90% |

## Protein Identified Sequence Coverage in XTC-1

|          |                                                                                                                                                                                                                                                    |             |       |      |   |   |    |       |        |
|----------|----------------------------------------------------------------------------------------------------------------------------------------------------------------------------------------------------------------------------------------------------|-------------|-------|------|---|---|----|-------|--------|
| XTC1-p29 | (O43169) Cytochrome b5 outer mitochondrial membrane isoform precursor                                                                                                                                                                              | CYB5M_HUMAN | 16314 | 100% | 2 | 2 | 4  | 0.04% | 36.30% |
| XTC1-p29 | (O43399) Tumor protein D54 (hD54) (Tumor protein D52-like 2)                                                                                                                                                                                       | TPD54_HUMAN | 22220 | 100% | 2 | 2 | 2  | 0.02% | 13.10% |
| XTC1-p29 | (O43399) Tumor protein D54 (hD54) (Tumor protein D52-like 2)                                                                                                                                                                                       | TPD54_HUMAN | 22220 | 100% | 2 | 2 | 2  | 0.02% | 13.10% |
| XTC1-p29 | (O43399) Tumor protein D54 (hD54) (Tumor protein D52-like 2)                                                                                                                                                                                       | TPD54_HUMAN | 22220 | 100% | 5 | 5 | 9  | 0.08% | 42.70% |
| XTC1-p29 | (O43399) Tumor protein D54 (hD54) (Tumor protein D52-like 2)                                                                                                                                                                                       | TPD54_HUMAN | 22220 | 100% | 5 | 6 | 11 | 0.10% | 49.50% |
| XTC1-p29 | (O43399) Tumor protein D54 (hD54) (Tumor protein D52-like 2)                                                                                                                                                                                       | TPD54_HUMAN | 22220 | 100% | 5 | 5 | 7  | 0.06% | 44.70% |
| XTC1-p29 | (O43399) Tumor protein D54 (hD54) (Tumor protein D52-like 2)                                                                                                                                                                                       | TPD54_HUMAN | 22220 | 100% | 7 | 8 | 14 | 0.13% | 41.70% |
| XTC1-p29 | (O43399) Tumor protein D54 (hD54) (Tumor protein D52-like 2)                                                                                                                                                                                       | TPD54_HUMAN | 22220 | 100% | 3 | 3 | 5  | 0.04% | 22.30% |
| XTC1-p29 | (O43399) Tumor protein D54 (hD54) (Tumor protein D52-like 2)                                                                                                                                                                                       | TPD54_HUMAN | 22220 | 100% | 3 | 3 | 6  | 0.06% | 28.60% |
| XTC1-p29 | (O43399) Tumor protein D54 (hD54) (Tumor protein D52-like 2)                                                                                                                                                                                       | TPD54_HUMAN | 22220 | 100% | 4 | 4 | 5  | 0.04% | 30.60% |
| XTC1-p29 | (O43399) Tumor protein D54 (hD54) (Tumor protein D52-like 2)                                                                                                                                                                                       | TPD54_HUMAN | 22220 | 100% | 2 | 2 | 4  | 0.03% | 14.60% |
| XTC1-p29 | (O43399) Tumor protein D54 (hD54) (Tumor protein D52-like 2)                                                                                                                                                                                       | TPD54_HUMAN | 22220 | 100% | 3 | 4 | 6  | 0.05% | 28.60% |
| XTC1-p29 | (O43399) Tumor protein D54 (hD54) (Tumor protein D52-like 2)                                                                                                                                                                                       | TPD54_HUMAN | 22220 | 100% | 3 | 4 | 5  | 0.04% | 14.60% |
| XTC1-p29 | (O43570) Carbonic anhydrase 12 precursor (EC 4.2.1.1) (Carbonic anhydrase XII) (Carbonate dehydratase XII) (CA-XII) (Tumor antigen HOM-RCC 3.1.3)                                                                                                  | CAH12_HUMAN | 39434 | 100% | 3 | 4 | 4  | 0.04% | 18.60% |
| XTC1-p29 | (O43570) Carbonic anhydrase 12 precursor (EC 4.2.1.1) (Carbonic anhydrase XII) (Carbonate dehydratase XII) (CA-XII) (Tumor antigen HOM-RCC 3.1.3)                                                                                                  | CAH12_HUMAN | 39434 | 100% | 2 | 2 | 2  | 0.02% | 13.00% |
| XTC1-p29 | (O43570) Carbonic anhydrase 12 precursor (EC 4.2.1.1) (Carbonic anhydrase XII) (Carbonate dehydratase XII) (CA-XII) (Tumor antigen HOM-RCC 3.1.3)                                                                                                  | CAH12_HUMAN | 39434 | 100% | 2 | 2 | 4  | 0.04% | 10.70% |
| XTC1-p29 | (O43570) Carbonic anhydrase 12 precursor (EC 4.2.1.1) (Carbonic anhydrase XII) (Carbonate dehydratase XII) (CA-XII) (Tumor antigen HOM-RCC 3.1.3)                                                                                                  | CAH12_HUMAN | 39434 | 100% | 2 | 2 | 3  | 0.03% | 10.20% |
| XTC1-p29 | (O43809) Cleavage and polyadenylation specificity factor 5 (Cleavage and polyadenylation specificity factor 25 kDa subunit) (CPSF 25 kDa subunit) (Pre-mRNA cleavage factor 1m 25-kDa subunit) (Nucleoside diphosphate-linked moiety X motif 21) ( | CPSF5_HUMAN | 26210 | 100% | 2 | 2 | 2  | 0.02% | 13.20% |
| XTC1-p29 | (O43852) Calumenin precursor (Crocalbin) (IEF SSP 9302)                                                                                                                                                                                            | CALU_HUMAN  | 37090 | 100% | 2 | 3 | 5  | 0.05% | 10.20% |
| XTC1-p29 | (O43852) Calumenin precursor (Crocalbin) (IEF SSP 9302)                                                                                                                                                                                            | CALU_HUMAN  | 37090 | 100% | 2 | 2 | 2  | 0.02% | 15.60% |
| XTC1-p29 | (O43852) Calumenin precursor (Crocalbin) (IEF SSP 9302)                                                                                                                                                                                            | CALU_HUMAN  | 37090 | 100% | 5 | 5 | 5  | 0.04% | 24.40% |

## Protein Identified Sequence Coverage in XTC-1

|          |                                                                                                                                                                                                          |             |        |      |   |   |   |       |        |
|----------|----------------------------------------------------------------------------------------------------------------------------------------------------------------------------------------------------------|-------------|--------|------|---|---|---|-------|--------|
| XTC1-p29 | (O43852) Calumenin precursor (Crococalbin) (IEF SSP 9302)                                                                                                                                                | CALU_HUMAN  | 37090  | 100% | 3 | 3 | 5 | 0.04% | 11.10% |
| XTC1-p29 | (O43852) Calumenin precursor (Crococalbin) (IEF SSP 9302)                                                                                                                                                | CALU_HUMAN  | 37090  | 100% | 3 | 3 | 4 | 0.04% | 20.60% |
| XTC1-p29 | (O43852) Calumenin precursor (Crococalbin) (IEF SSP 9302)                                                                                                                                                | CALU_HUMAN  | 37090  | 100% | 2 | 2 | 3 | 0.03% | 16.80% |
| XTC1-p29 | (O43852) Calumenin precursor (Crococalbin) (IEF SSP 9302)                                                                                                                                                | CALU_HUMAN  | 37090  | 100% | 2 | 3 | 8 | 0.07% | 16.80% |
| XTC1-p29 | (O60664) Mannose-6-phosphate receptor-binding protein 1 (Cargo selection protein TIP47) (47 kDa mannose 6-phosphate receptor-binding protein) (Placental protein 17) (PP17)                              | M6PBP_HUMAN | 47028  | 100% | 2 | 2 | 2 | 0.02% | 7.37%  |
| XTC1-p29 | (O60664) Mannose-6-phosphate receptor-binding protein 1 (Cargo selection protein TIP47) (47 kDa mannose 6-phosphate receptor-binding protein) (47 kDa MPR-binding protein) (Placental protein 17) (PP17) | M6PBP_HUMAN | 47028  | 100% | 2 | 2 | 2 | 0.02% | 6.91%  |
| XTC1-p29 | (O60664) Mannose-6-phosphate receptor-binding protein 1 (Cargo selection protein TIP47) (47 kDa mannose 6-phosphate receptor-binding protein) (47 kDa MPR-binding protein) (Placental protein 17) (PP17) | M6PBP_HUMAN | 47028  | 100% | 3 | 3 | 3 | 0.03% | 10.60% |
| XTC1-p29 | (O60664) Mannose-6-phosphate receptor-binding protein 1 (Cargo selection protein TIP47) (47 kDa mannose 6-phosphate receptor-binding protein) (47 kDa MPR-binding protein) (Placental protein 17) (PP17) | M6PBP_HUMAN | 47028  | 100% | 2 | 2 | 2 | 0.02% | 10.40% |
| XTC1-p29 | (O75367) Core histone macro-H2A.1 (Histone macroH2A1) (mH2A1) (H2A.y) (H2A.y) (Medulloblastoma antigen MU-MB-50.205)                                                                                     | H2AY_HUMAN  | 39470  | 100% | 2 | 2 | 2 | 0.02% | 8.36%  |
| XTC1-p29 | (O75367) Core histone macro-H2A.1 (Histone macroH2A1) (mH2A1) (H2A.y) (H2A.y) (Medulloblastoma antigen MU-MB-50.205)                                                                                     | H2AY_HUMAN  | 39470  | 100% | 3 | 4 | 5 | 0.04% | 12.90% |
| XTC1-p29 | (O75367) Core histone macro-H2A.1 (Histone macroH2A1) (mH2A1) (H2A.y) (H2A.y) (Medulloblastoma antigen MU-MB-50.205)                                                                                     | H2AY_HUMAN  | 39470  | 100% | 2 | 2 | 2 | 0.02% | 7.01%  |
| XTC1-p29 | (O75367) Core histone macro-H2A.1 (Histone macroH2A1) (mH2A1) (H2A.y) (H2A.y) (Medulloblastoma antigen MU-MB-50.205)                                                                                     | H2AY_HUMAN  | 39470  | 100% | 2 | 3 | 4 | 0.03% | 9.97%  |
| XTC1-p29 | (O75367) Core histone macro-H2A.1 (Histone macroH2A1) (mH2A1) (H2A.y) (H2A.y) (Medulloblastoma antigen MU-MB-50.205)                                                                                     | H2AY_HUMAN  | 39470  | 100% | 2 | 3 | 3 | 0.03% | 9.97%  |
| XTC1-p29 | (O75629) CREG1 protein precursor (Cellular repressor of E1A-stimulated genes 1)                                                                                                                          | CREG1_HUMAN | 24057  | 100% | 2 | 3 | 4 | 0.04% | 15.00% |
| XTC1-p29 | (O75629) CREG1 protein precursor (Cellular repressor of E1A-stimulated genes 1)                                                                                                                          | CREG1_HUMAN | 24057  | 100% | 2 | 2 | 3 | 0.03% | 16.80% |
| XTC1-p29 | (O75976) Carboxypeptidase D precursor (EC 3.4.17.22) (Metallo-carboxypeptidase D) (gp180)                                                                                                                | CBPD_HUMAN  | 152899 | 100% | 2 | 2 | 4 | 0.04% | 2.90%  |
| XTC1-p29 | (O75976) Carboxypeptidase D precursor (EC 3.4.17.22) (Metallo-carboxypeptidase D) (gp180)                                                                                                                | CBPD_HUMAN  | 152899 | 100% | 2 | 3 | 3 | 0.03% | 2.17%  |
| XTC1-p29 | (O75976) Carboxypeptidase D precursor (EC 3.4.17.22) (Metallo-carboxypeptidase D) (gp180)                                                                                                                | CBPD_HUMAN  | 152899 | 100% | 3 | 4 | 4 | 0.04% | 3.62%  |
| XTC1-p29 | (O75976) Carboxypeptidase D precursor (EC 3.4.17.22) (Metallo-carboxypeptidase D) (gp180)                                                                                                                | CBPD_HUMAN  | 152899 | 100% | 4 | 4 | 4 | 0.04% | 5.51%  |



## Protein Identified Sequence Coverage in XTC-1

|          |                                                                                                                                                                                                                                                     |             |        |      |   |   |    |       |        |
|----------|-----------------------------------------------------------------------------------------------------------------------------------------------------------------------------------------------------------------------------------------------------|-------------|--------|------|---|---|----|-------|--------|
| XTC1-p29 | (O75976) Carboxypeptidase D precursor (EC 3.4.17.22) (Metallo-carboxypeptidase D) (gp180)                                                                                                                                                           | CBPD_HUMAN  | 152899 | 100% | 3 | 3 | 5  | 0.05% | 4.78%  |
| XTC1-p29 | (O75976) Carboxypeptidase D precursor (EC 3.4.17.22) (Metallo-carboxypeptidase D) (gp180)                                                                                                                                                           | CBPD_HUMAN  | 152899 | 100% | 2 | 2 | 2  | 0.02% | 3.41%  |
| XTC1-p29 | (O75976) Carboxypeptidase D precursor (EC 3.4.17.22) (Metallo-carboxypeptidase D) (gp180)                                                                                                                                                           | CBPD_HUMAN  | 152899 | 100% | 3 | 3 | 4  | 0.04% | 4.13%  |
| XTC1-p29 | (O75976) Carboxypeptidase D precursor (EC 3.4.17.22) (Metallo-carboxypeptidase D) (gp180)                                                                                                                                                           | CBPD_HUMAN  | 152899 | 100% | 2 | 2 | 3  | 0.03% | 3.12%  |
| XTC1-p29 | (O75976) Carboxypeptidase D precursor (EC 3.4.17.22) (Metallo-carboxypeptidase D) (gp180)                                                                                                                                                           | CBPD_HUMAN  | 152899 | 100% | 3 | 3 | 4  | 0.04% | 6.74%  |
| XTC1-p29 | (P00390) Glutathione reductase, mitochondrial precursor (EC 1.8.1.7) (GR) (GRase)                                                                                                                                                                   | GSHR_HUMAN  | 56239  | 100% | 2 | 2 | 2  | 0.02% | 8.43%  |
| XTC1-p29 | (P00533) Epidermal growth factor receptor precursor (EC 2.7.10.1) (Receptor tyrosine-protein kinase ErbB-1)                                                                                                                                         | EGFR_HUMAN  | 134261 | 100% | 2 | 2 | 2  | 0.02% | 2.23%  |
| XTC1-p29 | (P00533) Epidermal growth factor receptor precursor (EC 2.7.10.1) (Receptor tyrosine-protein kinase ErbB-1)                                                                                                                                         | EGFR_HUMAN  | 134261 | 100% | 2 | 3 | 3  | 0.03% | 2.89%  |
| XTC1-p29 | (P00558) Phosphoglycerate kinase 1 (EC 2.7.2.3) (Primer recognition protein 2) (PRP 2)                                                                                                                                                              | PGK1_HUMAN  | 44466  | 100% | 2 | 3 | 5  | 0.05% | 8.41%  |
| XTC1-p29 | (P00558) Phosphoglycerate kinase 1 (EC 2.7.2.3) (Primer recognition protein 2) (PRP 2)                                                                                                                                                              | PGK1_HUMAN  | 44466  | 100% | 2 | 2 | 4  | 0.04% | 8.17%  |
| XTC1-p29 | (P00558) Phosphoglycerate kinase 1 (EC 2.7.2.3) (Primer recognition protein 2) (PRP 2)                                                                                                                                                              | PGK1_HUMAN  | 44466  | 100% | 2 | 3 | 4  | 0.04% | 8.17%  |
| XTC1-p29 | (P00558) Phosphoglycerate kinase 1 (EC 2.7.2.3) (Primer recognition protein 2) (PRP 2)                                                                                                                                                              | PGK1_HUMAN  | 44466  | 100% | 6 | 7 | 12 | 0.11% | 23.10% |
| XTC1-p29 | (P00558) Phosphoglycerate kinase 1 (EC 2.7.2.3) (Primer recognition protein 2) (PRP 2)                                                                                                                                                              | PGK1_HUMAN  | 44466  | 100% | 2 | 4 | 5  | 0.04% | 8.65%  |
| XTC1-p29 | (P00749) Urokinase-type plasminogen activator precursor (EC 3.4.21.73) (uPA) (U-plasminogen activator) [Contains: Urokinase-type plasminogen activator long chain A; Urokinase-type plasminogen activator short chain A; Urokinase-type plasminogen | UROK_HUMAN  | 48508  | 100% | 2 | 2 | 2  | 0.02% | 6.96%  |
| XTC1-p29 | (P01019) Angiotensinogen precursor [Contains: Angiotensin-1 (Angiotensin I) (Ang I); Angiotensin-2 (Angiotensin II) (Ang II); Angiotensin-3 (Angiotensin III) (Ang III) (Des-Asp[1]-angiotensin II)]                                                | ANGT_HUMAN  | 53137  | 100% | 2 | 2 | 4  | 0.04% | 7.42%  |
| XTC1-p29 | (P01019) Angiotensinogen precursor [Contains: Angiotensin-1 (Angiotensin I) (Ang I); Angiotensin-2 (Angiotensin II) (Ang II); Angiotensin-3 (Angiotensin III) (Ang III) (Des-Asp[1]-angiotensin II)]                                                | ANGT_HUMAN  | 53137  | 100% | 3 | 3 | 5  | 0.04% | 10.90% |
| XTC1-p29 | (P01033) Metalloproteinase inhibitor 1 precursor (TIMP-1) (Erythroid potentiating activity) (EPA) (Tissue inhibitor of metalloproteinases) (Fibroblast collagenase inhibitor) (Collagenase inhibitor)                                               | TIMP1_HUMAN | 23153  | 100% | 2 | 3 | 6  | 0.06% | 13.50% |
| XTC1-p29 | (P01033) Metalloproteinase inhibitor 1 precursor (TIMP-1) (Erythroid potentiating activity) (EPA) (Tissue inhibitor of metalloproteinases) (Fibroblast collagenase inhibitor) (Collagenase inhibitor)                                               | TIMP1_HUMAN | 23153  | 100% | 2 | 2 | 2  | 0.02% | 13.50% |

## Protein Identified Sequence Coverage in XTC-1

|          |                                                                                                                                                                                                       |             |        |      |   |   |    |       |        |
|----------|-------------------------------------------------------------------------------------------------------------------------------------------------------------------------------------------------------|-------------|--------|------|---|---|----|-------|--------|
| XTC1-p29 | (P01033) Metalloproteinase inhibitor 1 precursor (TIMP-1) (Erythroid potentiating activity) (EPA) (Tissue inhibitor of metalloproteinases) (Fibroblast collagenase inhibitor) (Collagenase inhibitor) | TIMP1_HUMAN | 23153  | 100% | 2 | 3 | 3  | 0.03% | 13.50% |
| XTC1-p29 | (P01033) Metalloproteinase inhibitor 1 precursor (TIMP-1) (Erythroid potentiating activity) (EPA) (Tissue inhibitor of metalloproteinases) (Fibroblast collagenase inhibitor) (Collagenase inhibitor) | TIMP1_HUMAN | 23153  | 100% | 2 | 2 | 3  | 0.03% | 13.50% |
| XTC1-p29 | (P01033) Metalloproteinase inhibitor 1 precursor (TIMP-1) (Erythroid potentiating activity) (EPA) (Tissue inhibitor of metalloproteinases) (Fibroblast collagenase inhibitor) (Collagenase inhibitor) | TIMP1_HUMAN | 23153  | 100% | 3 | 3 | 3  | 0.03% | 24.60% |
| XTC1-p29 | (P02545) Lamin-A/C (70 kDa lamin) (NY-REN-32 antigen)                                                                                                                                                 | LMNA_HUMAN  | 74123  | 100% | 2 | 2 | 2  | 0.02% | 4.37%  |
| XTC1-p29 | (P02751) Fibronectin precursor (FN) (Cold-insoluble globulin) (CIG)                                                                                                                                   | FINC_HUMAN  | 262581 | 100% | 2 | 2 | 2  | 0.02% | 1.47%  |
| XTC1-p29 | (P02751) Fibronectin precursor (FN) (Cold-insoluble globulin) (CIG)                                                                                                                                   | FINC_HUMAN  | 262581 | 100% | 3 | 3 | 4  | 0.04% | 2.85%  |
| XTC1-p29 | (P02751) Fibronectin precursor (FN) (Cold-insoluble globulin) (CIG)                                                                                                                                   | FINC_HUMAN  | 262581 | 100% | 2 | 2 | 2  | 0.02% | 1.89%  |
| XTC1-p29 | (P02751) Fibronectin precursor (FN) (Cold-insoluble globulin) (CIG)                                                                                                                                   | FINC_HUMAN  | 262581 | 100% | 2 | 2 | 2  | 0.02% | 1.59%  |
| XTC1-p29 | (P02751) Fibronectin precursor (FN) (Cold-insoluble globulin) (CIG)                                                                                                                                   | FINC_HUMAN  | 262581 | 100% | 6 | 6 | 9  | 0.08% | 6.24%  |
| XTC1-p29 | (P02751) Fibronectin precursor (FN) (Cold-insoluble globulin) (CIG)                                                                                                                                   | FINC_HUMAN  | 262581 | 100% | 3 | 3 | 3  | 0.03% | 3.65%  |
| XTC1-p29 | (P02751) Fibronectin precursor (FN) (Cold-insoluble globulin) (CIG)                                                                                                                                   | FINC_HUMAN  | 262581 | 100% | 2 | 2 | 2  | 0.02% | 1.26%  |
| XTC1-p29 | (P02751) Fibronectin precursor (FN) (Cold-insoluble globulin) (CIG)                                                                                                                                   | FINC_HUMAN  | 262581 | 100% | 2 | 2 | 2  | 0.02% | 1.97%  |
| XTC1-p29 | (P02768) Serum albumin precursor                                                                                                                                                                      | ALBU_HUMAN  | 69349  | 100% | 3 | 3 | 4  | 0.04% | 7.06%  |
| XTC1-p29 | (P04004) Vitronectin precursor (Serum spreading factor) (S-protein) (V75) [Contains: Vitronectin V65 subunit; Vitronectin V10 subunit; Somatomedin B]                                                 | VTNC_HUMAN  | 54288  | 100% | 2 | 2 | 2  | 0.02% | 8.79%  |
| XTC1-p29 | (P04062) Glucosylceramidase precursor (EC 3.2.1.45) (Beta-glucocerebrosidase) (Acid beta-glucosidase) (D-glucosyl-N-acylsphingosine glucohydrolase) (Alglucerase) (Imiglucerase)                      | GLCM_HUMAN  | 59700  | 100% | 3 | 4 | 9  | 0.09% | 12.30% |
| XTC1-p29 | (P04062) Glucosylceramidase precursor (EC 3.2.1.45) (Beta-glucocerebrosidase) (Acid beta-glucosidase) (D-glucosyl-N-acylsphingosine glucohydrolase) (Alglucerase) (Imiglucerase)                      | GLCM_HUMAN  | 59700  | 100% | 5 | 7 | 7  | 0.07% | 12.70% |
| XTC1-p29 | (P04062) Glucosylceramidase precursor (EC 3.2.1.45) (Beta-glucocerebrosidase) (Acid beta-glucosidase) (D-glucosyl-N-acylsphingosine glucohydrolase) (Alglucerase) (Imiglucerase)                      | GLCM_HUMAN  | 59700  | 100% | 5 | 8 | 16 | 0.15% | 12.70% |
| XTC1-p29 | (P04062) Glucosylceramidase precursor (EC 3.2.1.45) (Beta-glucocerebrosidase) (Acid beta-glucosidase) (D-glucosyl-N-acylsphingosine glucohydrolase) (Alglucerase) (Imiglucerase)                      | GLCM_HUMAN  | 59700  | 100% | 4 | 5 | 13 | 0.12% | 12.30% |

## Protein Identified Sequence Coverage in XTC-1

|          |                                                                                                                                                                                  |             |       |      |   |   |    |       |        |
|----------|----------------------------------------------------------------------------------------------------------------------------------------------------------------------------------|-------------|-------|------|---|---|----|-------|--------|
| XTC1-p29 | (P04062) Glucosylceramidase precursor (EC 3.2.1.45) (Beta-glucocerebrosidase) (Acid beta-glucosidase) (D-glucosyl-N-acylsphingosine glucohydrolase) (Alglucerase) (Imiglucerase) | GLCM_HUMAN  | 59700 | 100% | 3 | 4 | 7  | 0.07% | 9.51%  |
| XTC1-p29 | (P04062) Glucosylceramidase precursor (EC 3.2.1.45) (Beta-glucocerebrosidase) (Acid beta-glucosidase) (D-glucosyl-N-acylsphingosine glucohydrolase) (Alglucerase) (Imiglucerase) | GLCM_HUMAN  | 59700 | 100% | 8 | 8 | 12 | 0.11% | 25.20% |
| XTC1-p29 | (P04062) Glucosylceramidase precursor (EC 3.2.1.45) (Beta-glucocerebrosidase) (Acid beta-glucosidase) (D-glucosyl-N-acylsphingosine glucohydrolase) (Alglucerase) (Imiglucerase) | GLCM_HUMAN  | 59700 | 100% | 6 | 7 | 12 | 0.11% | 18.10% |
| XTC1-p29 | (P04062) Glucosylceramidase precursor (EC 3.2.1.45) (Beta-glucocerebrosidase) (Acid beta-glucosidase) (D-glucosyl-N-acylsphingosine glucohydrolase) (Alglucerase) (Imiglucerase) | GLCM_HUMAN  | 59700 | 100% | 4 | 4 | 7  | 0.06% | 14.20% |
| XTC1-p29 | (P04062) Glucosylceramidase precursor (EC 3.2.1.45) (Beta-glucocerebrosidase) (Acid beta-glucosidase) (D-glucosyl-N-acylsphingosine glucohydrolase) (Alglucerase) (Imiglucerase) | GLCM_HUMAN  | 59700 | 100% | 8 | 9 | 12 | 0.11% | 21.10% |
| XTC1-p29 | (P04062) Glucosylceramidase precursor (EC 3.2.1.45) (Beta-glucocerebrosidase) (Acid beta-glucosidase) (D-glucosyl-N-acylsphingosine glucohydrolase) (Alglucerase) (Imiglucerase) | GLCM_HUMAN  | 59700 | 100% | 6 | 6 | 10 | 0.09% | 14.90% |
| XTC1-p29 | (P04062) Glucosylceramidase precursor (EC 3.2.1.45) (Beta-glucocerebrosidase) (Acid beta-glucosidase) (D-glucosyl-N-acylsphingosine glucohydrolase) (Alglucerase) (Imiglucerase) | GLCM_HUMAN  | 59700 | 100% | 3 | 3 | 6  | 0.06% | 13.40% |
| XTC1-p29 | (P04062) Glucosylceramidase precursor (EC 3.2.1.45) (Beta-glucocerebrosidase) (Acid beta-glucosidase) (D-glucosyl-N-acylsphingosine glucohydrolase) (Alglucerase) (Imiglucerase) | GLCM_HUMAN  | 59700 | 100% | 2 | 2 | 3  | 0.03% | 5.04%  |
| XTC1-p29 | (P04062) Glucosylceramidase precursor (EC 3.2.1.45) (Beta-glucocerebrosidase) (Acid beta-glucosidase) (D-glucosyl-N-acylsphingosine glucohydrolase) (Alglucerase) (Imiglucerase) | GLCM_HUMAN  | 59700 | 100% | 2 | 2 | 4  | 0.03% | 9.70%  |
| XTC1-p29 | (P04062) Glucosylceramidase precursor (EC 3.2.1.45) (Beta-glucocerebrosidase) (Acid beta-glucosidase) (D-glucosyl-N-acylsphingosine glucohydrolase) (Alglucerase) (Imiglucerase) | GLCM_HUMAN  | 59700 | 100% | 4 | 6 | 8  | 0.07% | 13.10% |
| XTC1-p29 | (P04075) Fructose-bisphosphate aldolase A (EC 4.1.2.13) (Muscle-type aldolase) (Lung cancer antigen NY-LU-1)                                                                     | ALDOA_HUMAN | 39271 | 100% | 2 | 2 | 2  | 0.02% | 9.37%  |
| XTC1-p29 | (P04075) Fructose-bisphosphate aldolase A (EC 4.1.2.13) (Muscle-type aldolase) (Lung cancer antigen NY-LU-1)                                                                     | ALDOA_HUMAN | 39271 | 100% | 2 | 2 | 3  | 0.03% | 6.34%  |
| XTC1-p29 | (P04075) Fructose-bisphosphate aldolase A (EC 4.1.2.13) (Muscle-type aldolase) (Lung cancer antigen NY-LU-1)                                                                     | ALDOA_HUMAN | 39271 | 100% | 2 | 2 | 3  | 0.03% | 9.37%  |
| XTC1-p29 | (P04075) Fructose-bisphosphate aldolase A (EC 4.1.2.13) (Muscle-type aldolase) (Lung cancer antigen NY-LU-1)                                                                     | ALDOA_HUMAN | 39271 | 100% | 2 | 2 | 3  | 0.03% | 9.37%  |
| XTC1-p29 | (P04075) Fructose-bisphosphate aldolase A (EC 4.1.2.13) (Muscle-type aldolase) (Lung cancer antigen NY-LU-1)                                                                     | ALDOA_HUMAN | 39271 | 100% | 2 | 3 | 3  | 0.03% | 9.64%  |

## Protein Identified Sequence Coverage in XTC-1

|          |                                                                                                                                  |             |       |      |   |    |    |       |        |
|----------|----------------------------------------------------------------------------------------------------------------------------------|-------------|-------|------|---|----|----|-------|--------|
| XTC1-p29 | (P04083) Annexin A1 (Annexin I) (Lipocortin I)<br>(Calpactin II) (Chromobindin-9) (p35)<br>(Phospholipase A2 inhibitory protein) | ANXA1_HUMAN | 38567 | 100% | 2 | 2  | 2  | 0.02% | 11.60% |
| XTC1-p29 | (P04083) Annexin A1 (Annexin I) (Lipocortin I)<br>(Calpactin II) (Chromobindin-9) (p35)<br>(Phospholipase A2 inhibitory protein) | ANXA1_HUMAN | 38567 | 100% | 5 | 5  | 9  | 0.08% | 17.10% |
| XTC1-p29 | (P04083) Annexin A1 (Annexin I) (Lipocortin I)<br>(Calpactin II) (Chromobindin-9) (p35)<br>(Phospholipase A2 inhibitory protein) | ANXA1_HUMAN | 38567 | 100% | 8 | 9  | 15 | 0.14% | 33.60% |
| XTC1-p29 | (P04083) Annexin A1 (Annexin I) (Lipocortin I)<br>(Calpactin II) (Chromobindin-9) (p35)<br>(Phospholipase A2 inhibitory protein) | ANXA1_HUMAN | 38567 | 100% | 5 | 5  | 8  | 0.07% | 23.80% |
| XTC1-p29 | (P04083) Annexin A1 (Annexin I) (Lipocortin I)<br>(Calpactin II) (Chromobindin-9) (p35)<br>(Phospholipase A2 inhibitory protein) | ANXA1_HUMAN | 38567 | 100% | 7 | 7  | 13 | 0.12% | 34.50% |
| XTC1-p29 | (P04083) Annexin A1 (Annexin I) (Lipocortin I)<br>(Calpactin II) (Chromobindin-9) (p35)<br>(Phospholipase A2 inhibitory protein) | ANXA1_HUMAN | 38567 | 100% | 8 | 8  | 15 | 0.13% | 36.50% |
| XTC1-p29 | (P04083) Annexin A1 (Annexin I) (Lipocortin I)<br>(Calpactin II) (Chromobindin-9) (p35)<br>(Phospholipase A2 inhibitory protein) | ANXA1_HUMAN | 38567 | 100% | 4 | 5  | 8  | 0.07% | 16.80% |
| XTC1-p29 | (P04083) Annexin A1 (Annexin I) (Lipocortin I)<br>(Calpactin II) (Chromobindin-9) (p35)<br>(Phospholipase A2 inhibitory protein) | ANXA1_HUMAN | 38567 | 100% | 4 | 4  | 9  | 0.08% | 17.70% |
| XTC1-p29 | (P04083) Annexin A1 (Annexin I) (Lipocortin I)<br>(Calpactin II) (Chromobindin-9) (p35)<br>(Phospholipase A2 inhibitory protein) | ANXA1_HUMAN | 38567 | 100% | 3 | 4  | 8  | 0.07% | 13.30% |
| XTC1-p29 | (P04179) Superoxide dismutase [Mn], mitochondrial<br>precursor (EC 1.15.1.1)                                                     | SODM_HUMAN  | 24705 | 100% | 2 | 2  | 2  | 0.02% | 10.40% |
| XTC1-p29 | (P04179) Superoxide dismutase [Mn], mitochondrial<br>precursor (EC 1.15.1.1)                                                     | SODM_HUMAN  | 24705 | 100% | 2 | 2  | 2  | 0.02% | 10.40% |
| XTC1-p29 | (P04216) Thy-1 membrane glycoprotein precursor<br>(Thy-1 antigen) (CD90 antigen) (CDw90 antigen)                                 | THY1_HUMAN  | 17917 | 100% | 7 | 7  | 17 | 0.16% | 54.00% |
| XTC1-p29 | (P04216) Thy-1 membrane glycoprotein precursor<br>(Thy-1 antigen) (CD90 antigen) (CDw90 antigen)                                 | THY1_HUMAN  | 17917 | 100% | 8 | 13 | 19 | 0.19% | 47.80% |
| XTC1-p29 | (P04216) Thy-1 membrane glycoprotein precursor<br>(Thy-1 antigen) (CD90 antigen) (CDw90 antigen)                                 | THY1_HUMAN  | 17917 | 100% | 9 | 14 | 34 | 0.32% | 56.50% |
| XTC1-p29 | (P04216) Thy-1 membrane glycoprotein precursor<br>(Thy-1 antigen) (CD90 antigen) (CDw90 antigen)                                 | THY1_HUMAN  | 17917 | 100% | 7 | 9  | 26 | 0.24% | 47.80% |
| XTC1-p29 | (P04216) Thy-1 membrane glycoprotein precursor<br>(Thy-1 antigen) (CD90 antigen) (CDw90 antigen)                                 | THY1_HUMAN  | 17917 | 100% | 4 | 4  | 9  | 0.09% | 36.00% |
| XTC1-p29 | (P04216) Thy-1 membrane glycoprotein precursor<br>(Thy-1 antigen) (CD90 antigen) (CDw90 antigen)                                 | THY1_HUMAN  | 17917 | 100% | 4 | 5  | 13 | 0.12% | 24.80% |
| XTC1-p29 | (P04216) Thy-1 membrane glycoprotein precursor<br>(Thy-1 antigen) (CD90 antigen) (CDw90 antigen)                                 | THY1_HUMAN  | 17917 | 100% | 4 | 7  | 15 | 0.14% | 24.80% |
| XTC1-p29 | (P04216) Thy-1 membrane glycoprotein precursor<br>(Thy-1 antigen) (CD90 antigen) (CDw90 antigen)                                 | THY1_HUMAN  | 17917 | 100% | 4 | 7  | 57 | 0.52% | 24.80% |

## Protein Identified Sequence Coverage in XTC-1

|          |                                                                                                                                                                                        |             |       |      |   |   |    |       |        |
|----------|----------------------------------------------------------------------------------------------------------------------------------------------------------------------------------------|-------------|-------|------|---|---|----|-------|--------|
| XTC1-p29 | (P04216) Thy-1 membrane glycoprotein precursor (Thy-1 antigen) (CD90 antigen) (CDw90 antigen)                                                                                          | THY1_HUMAN  | 17917 | 100% | 4 | 7 | 25 | 0.22% | 24.80% |
| XTC1-p29 | (P04216) Thy-1 membrane glycoprotein precursor (Thy-1 antigen) (CD90 antigen) (CDw90 antigen)                                                                                          | THY1_HUMAN  | 17917 | 100% | 4 | 7 | 33 | 0.29% | 24.80% |
| XTC1-p29 | (P04216) Thy-1 membrane glycoprotein precursor (Thy-1 antigen) (CD90 antigen) (CDw90 antigen)                                                                                          | THY1_HUMAN  | 17917 | 100% | 2 | 3 | 15 | 0.13% | 14.90% |
| XTC1-p29 | (P04233) HLA class II histocompatibility antigen gamma chain (HLA-DR antigens-associated invariant chain) (Ia antigen-associated invariant chain) (Ii) (p33) (CD74 antigen)            | HG2A_HUMAN  | 33498 | 100% | 3 | 4 | 4  | 0.04% | 23.30% |
| XTC1-p29 | (P04233) HLA class II histocompatibility antigen gamma chain (HLA-DR antigens-associated invariant chain) (Ia antigen-associated invariant chain) (Ii) (p33) (CD74 antigen)            | HG2A_HUMAN  | 33498 | 100% | 4 | 4 | 5  | 0.05% | 23.30% |
| XTC1-p29 | (P04233) HLA class II histocompatibility antigen gamma chain (HLA-DR antigens-associated invariant chain) (Ia antigen-associated invariant chain) (Ii) (p33) (CD74 antigen)            | HG2A_HUMAN  | 33498 | 100% | 3 | 3 | 4  | 0.04% | 22.60% |
| XTC1-p29 | (P04233) HLA class II histocompatibility antigen gamma chain (HLA-DR antigens-associated invariant chain) (Ia antigen-associated invariant chain) (Ii) (p33) (CD74 antigen)            | HG2A_HUMAN  | 33498 | 100% | 2 | 2 | 2  | 0.02% | 7.43%  |
| XTC1-p29 | (P04233) HLA class II histocompatibility antigen gamma chain (HLA-DR antigens-associated invariant chain) (Ia antigen-associated invariant chain) (Ii) (p33) (CD74 antigen)            | HG2A_HUMAN  | 33498 | 100% | 2 | 2 | 4  | 0.04% | 11.10% |
| XTC1-p29 | (P04233) HLA class II histocompatibility antigen gamma chain (HLA-DR antigens-associated invariant chain) (Ia antigen-associated invariant chain) (Ii) (p33) (CD74 antigen)            | HG2A_HUMAN  | 33498 | 100% | 3 | 3 | 5  | 0.04% | 14.20% |
| XTC1-p29 | (P04264) Keratin, type II cytoskeletal 1 (Cytokeratin-1) (CK-1) (Keratin-1) (K1) (67 kDa cyokeratin) (Hair alpha protein)                                                              | K2C1_HUMAN  | 65870 | 100% | 2 | 2 | 2  | 0.02% | 3.73%  |
| XTC1-p29 | (P04406) Glyceraldehyde-3-phosphate dehydrogenase (EC 1.2.1.12) (GAPDH)                                                                                                                | G3P_HUMAN   | 35904 | 100% | 4 | 4 | 6  | 0.06% | 22.20% |
| XTC1-p29 | (P04406) Glyceraldehyde-3-phosphate dehydrogenase (EC 1.2.1.12) (GAPDH)                                                                                                                | G3P_HUMAN   | 35904 | 100% | 4 | 4 | 6  | 0.06% | 18.00% |
| XTC1-p29 | (P04406) Glyceraldehyde-3-phosphate dehydrogenase (EC 1.2.1.12) (GAPDH)                                                                                                                | G3P_HUMAN   | 35904 | 100% | 5 | 5 | 9  | 0.08% | 26.30% |
| XTC1-p29 | (P04406) Glyceraldehyde-3-phosphate dehydrogenase (EC 1.2.1.12) (GAPDH)                                                                                                                | G3P_HUMAN   | 35904 | 100% | 6 | 6 | 11 | 0.10% | 29.60% |
| XTC1-p29 | (P04406) Glyceraldehyde-3-phosphate dehydrogenase (EC 1.2.1.12) (GAPDH)                                                                                                                | G3P_HUMAN   | 35904 | 100% | 5 | 5 | 9  | 0.08% | 26.60% |
| XTC1-p29 | (P04406) Glyceraldehyde-3-phosphate dehydrogenase (EC 1.2.1.12) (GAPDH)                                                                                                                | G3P_HUMAN   | 35904 | 100% | 2 | 2 | 3  | 0.03% | 13.50% |
| XTC1-p29 | (P04406) Glyceraldehyde-3-phosphate dehydrogenase (EC 1.2.1.12) (GAPDH)                                                                                                                | G3P_HUMAN   | 35904 | 100% | 2 | 3 | 9  | 0.08% | 15.60% |
| XTC1-p29 | (P04792) Heat-shock protein beta-1 (HspB1) (Heat shock 27 kDa protein) (HSP 27) (Stress-responsive protein 27) (SRP27) (Estrogen-regulated 24 kDa protein) (28 kDa heat shock protein) | HSPB1_HUMAN | 22765 | 100% | 3 | 3 | 4  | 0.04% | 28.30% |

## Protein Identified Sequence Coverage in XTC-1

|          |                                                                                                                                                                                        |             |       |      |   |   |   |       |        |
|----------|----------------------------------------------------------------------------------------------------------------------------------------------------------------------------------------|-------------|-------|------|---|---|---|-------|--------|
| XTC1-p29 | (P04792) Heat-shock protein beta-1 (HspB1) (Heat shock 27 kDa protein) (HSP 27) (Stress-responsive protein 27) (SRP27) (Estrogen-regulated 24 kDa protein) (28 kDa heat shock protein) | HSPB1_HUMAN | 22765 | 100% | 2 | 2 | 4 | 0.04% | 13.20% |
| XTC1-p29 | (P04792) Heat-shock protein beta-1 (HspB1) (Heat shock 27 kDa protein) (HSP 27) (Stress-responsive protein 27) (SRP27) (Estrogen-regulated 24 kDa protein) (28 kDa heat shock protein) | HSPB1_HUMAN | 22765 | 100% | 3 | 3 | 3 | 0.03% | 28.30% |
| XTC1-p29 | (P04792) Heat-shock protein beta-1 (HspB1) (Heat shock 27 kDa protein) (HSP 27) (Stress-responsive protein 27) (SRP27) (Estrogen-regulated 24 kDa protein) (28 kDa heat shock protein) | HSPB1_HUMAN | 22765 | 100% | 2 | 2 | 4 | 0.04% | 13.20% |
| XTC1-p29 | (P05026) Sodium/potassium-transporting ATPase subunit beta-1 (Sodium/potassium-dependent ATPase beta-1 subunit)                                                                        | AT1B1_HUMAN | 35045 | 100% | 2 | 2 | 3 | 0.03% | 13.20% |
| XTC1-p29 | (P05026) Sodium/potassium-transporting ATPase subunit beta-1 (Sodium/potassium-dependent ATPase beta-1 subunit)                                                                        | AT1B1_HUMAN | 35045 | 100% | 2 | 2 | 2 | 0.02% | 13.20% |
| XTC1-p29 | (P05026) Sodium/potassium-transporting ATPase subunit beta-1 (Sodium/potassium-dependent ATPase beta-1 subunit)                                                                        | AT1B1_HUMAN | 35045 | 100% | 2 | 2 | 2 | 0.02% | 8.25%  |
| XTC1-p29 | (P05106) Integrin beta-3 precursor (Platelet membrane glycoprotein IIIa) (GPIIIa) (CD61 antigen)                                                                                       | ITB3_HUMAN  | 87196 | 100% | 2 | 2 | 2 | 0.02% | 5.33%  |
| XTC1-p29 | (P05106) Integrin beta-3 precursor (Platelet membrane glycoprotein IIIa) (GPIIIa) (CD61 antigen)                                                                                       | ITB3_HUMAN  | 87196 | 100% | 2 | 2 | 3 | 0.03% | 3.30%  |
| XTC1-p29 | (P05106) Integrin beta-3 precursor (Platelet membrane glycoprotein IIIa) (GPIIIa) (CD61 antigen)                                                                                       | ITB3_HUMAN  | 87196 | 100% | 2 | 2 | 4 | 0.04% | 6.09%  |
| XTC1-p29 | (P05106) Integrin beta-3 precursor (Platelet membrane glycoprotein IIIa) (GPIIIa) (CD61 antigen)                                                                                       | ITB3_HUMAN  | 87196 | 100% | 2 | 2 | 4 | 0.04% | 7.11%  |
| XTC1-p29 | (P05362) Intercellular adhesion molecule 1 precursor (ICAM-1) (Major group rhinovirus receptor) (CD54 antigen)                                                                         | ICAM1_HUMAN | 57807 | 100% | 3 | 3 | 6 | 0.06% | 11.70% |
| XTC1-p29 | (P05362) Intercellular adhesion molecule 1 precursor (ICAM-1) (Major group rhinovirus receptor) (CD54 antigen)                                                                         | ICAM1_HUMAN | 57807 | 100% | 5 | 5 | 5 | 0.05% | 21.80% |
| XTC1-p29 | (P05362) Intercellular adhesion molecule 1 precursor (ICAM-1) (Major group rhinovirus receptor) (CD54 antigen)                                                                         | ICAM1_HUMAN | 57807 | 100% | 3 | 3 | 4 | 0.04% | 11.70% |
| XTC1-p29 | (P05362) Intercellular adhesion molecule 1 precursor (ICAM-1) (Major group rhinovirus receptor) (CD54 antigen)                                                                         | ICAM1_HUMAN | 57807 | 100% | 2 | 2 | 4 | 0.04% | 4.51%  |
| XTC1-p29 | (P05362) Intercellular adhesion molecule 1 precursor (ICAM-1) (Major group rhinovirus receptor) (CD54 antigen)                                                                         | ICAM1_HUMAN | 57807 | 100% | 3 | 3 | 6 | 0.06% | 16.90% |
| XTC1-p29 | (P05362) Intercellular adhesion molecule 1 precursor (ICAM-1) (Major group rhinovirus receptor) (CD54 antigen)                                                                         | ICAM1_HUMAN | 57807 | 100% | 4 | 4 | 8 | 0.07% | 9.59%  |

## Protein Identified Sequence Coverage in XTC-1

|          |                                                                                                                     |             |       |      |    |    |    |       |        |
|----------|---------------------------------------------------------------------------------------------------------------------|-------------|-------|------|----|----|----|-------|--------|
| XTC1-p29 | (P05362) Intercellular adhesion molecule 1 precursor (ICAM-1) (Major group rhinovirus receptor) (CD54 antigen)      | ICAM1_HUMAN | 57807 | 100% | 6  | 6  | 10 | 0.09% | 16.00% |
| XTC1-p29 | (P05362) Intercellular adhesion molecule 1 precursor (ICAM-1) (Major group rhinovirus receptor) (CD54 antigen)      | ICAM1_HUMAN | 57807 | 100% | 2  | 2  | 4  | 0.04% | 5.64%  |
| XTC1-p29 | (P05362) Intercellular adhesion molecule 1 precursor (ICAM-1) (Major group rhinovirus receptor) (CD54 antigen)      | ICAM1_HUMAN | 57807 | 100% | 6  | 6  | 7  | 0.06% | 16.50% |
| XTC1-p29 | (P05362) Intercellular adhesion molecule 1 precursor (ICAM-1) (Major group rhinovirus receptor) (CD54 antigen)      | ICAM1_HUMAN | 57807 | 100% | 5  | 5  | 9  | 0.08% | 12.20% |
| XTC1-p29 | (P05362) Intercellular adhesion molecule 1 precursor (ICAM-1) (Major group rhinovirus receptor) (CD54 antigen)      | ICAM1_HUMAN | 57807 | 100% | 4  | 4  | 5  | 0.04% | 12.40% |
| XTC1-p29 | (P05362) Intercellular adhesion molecule 1 precursor (ICAM-1) (Major group rhinovirus receptor) (CD54 antigen)      | ICAM1_HUMAN | 57807 | 100% | 2  | 2  | 2  | 0.02% | 9.40%  |
| XTC1-p29 | (P05388) 60S acidic ribosomal protein P0 (L10E)                                                                     | RLA0_HUMAN  | 34256 | 100% | 2  | 2  | 3  | 0.03% | 6.94%  |
| XTC1-p29 | (P05455) Lupus La protein (Sjogren syndrome type B antigen) (SS-B) (La ribonucleoprotein) (La autoantigen)          | LA_HUMAN    | 46821 | 100% | 2  | 2  | 3  | 0.03% | 7.35%  |
| XTC1-p29 | (P05556) Integrin beta-1 precursor (Fibronectin receptor beta subunit) (Integrin VLA-4 beta subunit) (CD29 antigen) | ITB1_HUMAN  | 88447 | 100% | 2  | 2  | 3  | 0.03% | 5.64%  |
| XTC1-p29 | (P05556) Integrin beta-1 precursor (Fibronectin receptor beta subunit) (Integrin VLA-4 beta subunit) (CD29 antigen) | ITB1_HUMAN  | 88447 | 100% | 7  | 7  | 8  | 0.07% | 11.90% |
| XTC1-p29 | (P05556) Integrin beta-1 precursor (Fibronectin receptor beta subunit) (Integrin VLA-4 beta subunit) (CD29 antigen) | ITB1_HUMAN  | 88447 | 100% | 4  | 4  | 7  | 0.06% | 8.15%  |
| XTC1-p29 | (P05556) Integrin beta-1 precursor (Fibronectin receptor beta subunit) (Integrin VLA-4 beta subunit) (CD29 antigen) | ITB1_HUMAN  | 88447 | 100% | 4  | 4  | 6  | 0.06% | 7.02%  |
| XTC1-p29 | (P05556) Integrin beta-1 precursor (Fibronectin receptor beta subunit) (Integrin VLA-4 beta subunit) (CD29 antigen) | ITB1_HUMAN  | 88447 | 100% | 7  | 8  | 12 | 0.11% | 11.20% |
| XTC1-p29 | (P05556) Integrin beta-1 precursor (Fibronectin receptor beta subunit) (Integrin VLA-4 beta subunit) (CD29 antigen) | ITB1_HUMAN  | 88447 | 100% | 3  | 3  | 3  | 0.03% | 8.02%  |
| XTC1-p29 | (P05556) Integrin beta-1 precursor (Fibronectin receptor beta subunit) (Integrin VLA-4 beta subunit) (CD29 antigen) | ITB1_HUMAN  | 88447 | 100% | 10 | 11 | 20 | 0.18% | 17.00% |
| XTC1-p29 | (P05556) Integrin beta-1 precursor (Fibronectin receptor beta subunit) (Integrin VLA-4 beta subunit) (CD29 antigen) | ITB1_HUMAN  | 88447 | 100% | 6  | 7  | 12 | 0.11% | 9.90%  |
| XTC1-p29 | (P05556) Integrin beta-1 precursor (Fibronectin receptor beta subunit) (Integrin VLA-4 beta subunit) (CD29 antigen) | ITB1_HUMAN  | 88447 | 100% | 4  | 4  | 6  | 0.06% | 10.80% |
| XTC1-p29 | (P05556) Integrin beta-1 precursor (Fibronectin receptor beta subunit) (Integrin VLA-4 beta subunit) (CD29 antigen) | ITB1_HUMAN  | 88447 | 100% | 5  | 6  | 9  | 0.08% | 7.89%  |
| XTC1-p29 | (P05556) Integrin beta-1 precursor (Fibronectin receptor beta subunit) (Integrin VLA-4 beta subunit) (CD29 antigen) | ITB1_HUMAN  | 88447 | 100% | 2  | 3  | 6  | 0.05% | 3.88%  |

## Protein Identified Sequence Coverage in XTC-1

|          |                                                                                                                                                                                                                            |             |       |      |   |   |    |       |        |
|----------|----------------------------------------------------------------------------------------------------------------------------------------------------------------------------------------------------------------------------|-------------|-------|------|---|---|----|-------|--------|
| XTC1-p29 | (P05556) Integrin beta-1 precursor (Fibronectin receptor beta subunit) (Integrin VLA-4 beta subunit) (CD29 antigen)                                                                                                        | ITB1_HUMAN  | 88447 | 100% | 4 | 5 | 8  | 0.07% | 10.20% |
| XTC1-p29 | (P06276) Cholinesterase precursor (EC 3.1.1.8) (Acylocholine acylhydrolase) (Choline esterase II) (Butyrylcholine esterase) (Pseudocholinesterase)                                                                         | CHLE_HUMAN  | 68402 | 100% | 2 | 2 | 2  | 0.02% | 6.48%  |
| XTC1-p29 | (P06276) Cholinesterase precursor (EC 3.1.1.8) (Acylocholine acylhydrolase) (Choline esterase II) (Butyrylcholine esterase) (Pseudocholinesterase)                                                                         | CHLE_HUMAN  | 68402 | 100% | 2 | 2 | 2  | 0.02% | 6.48%  |
| XTC1-p29 | (P06276) Cholinesterase precursor (EC 3.1.1.8) (Acylocholine acylhydrolase) (Choline esterase II) (Butyrylcholine esterase) (Pseudocholinesterase)                                                                         | CHLE_HUMAN  | 68402 | 100% | 3 | 3 | 3  | 0.03% | 8.47%  |
| XTC1-p29 | (P06276) Cholinesterase precursor (EC 3.1.1.8) (Acylocholine acylhydrolase) (Choline esterase II) (Butyrylcholine esterase) (Pseudocholinesterase)                                                                         | CHLE_HUMAN  | 68402 | 100% | 4 | 5 | 9  | 0.08% | 10.50% |
| XTC1-p29 | (P06276) Cholinesterase precursor (EC 3.1.1.8) (Acylocholine acylhydrolase) (Choline esterase II) (Butyrylcholine esterase) (Pseudocholinesterase)                                                                         | CHLE_HUMAN  | 68402 | 100% | 4 | 4 | 6  | 0.05% | 13.00% |
| XTC1-p29 | (P06276) Cholinesterase precursor (EC 3.1.1.8) (Acylocholine acylhydrolase) (Choline esterase II) (Butyrylcholine esterase) (Pseudocholinesterase)                                                                         | CHLE_HUMAN  | 68402 | 100% | 5 | 6 | 7  | 0.06% | 12.10% |
| XTC1-p29 | (P06276) Cholinesterase precursor (EC 3.1.1.8) (Acylocholine acylhydrolase) (Choline esterase II) (Butyrylcholine esterase) (Pseudocholinesterase)                                                                         | CHLE_HUMAN  | 68402 | 100% | 3 | 3 | 3  | 0.03% | 6.81%  |
| XTC1-p29 | (P06276) Cholinesterase precursor (EC 3.1.1.8) (Acylocholine acylhydrolase) (Choline esterase II) (Butyrylcholine esterase) (Pseudocholinesterase)                                                                         | CHLE_HUMAN  | 68402 | 100% | 3 | 3 | 5  | 0.05% | 7.14%  |
| XTC1-p29 | (P06276) Cholinesterase precursor (EC 3.1.1.8) (Acylocholine acylhydrolase) (Choline esterase II) (Butyrylcholine esterase) (Pseudocholinesterase)                                                                         | CHLE_HUMAN  | 68402 | 100% | 2 | 2 | 2  | 0.02% | 5.15%  |
| XTC1-p29 | (P06276) Cholinesterase precursor (EC 3.1.1.8) (Acylocholine acylhydrolase) (Choline esterase II) (Butyrylcholine esterase) (Pseudocholinesterase)                                                                         | CHLE_HUMAN  | 68402 | 100% | 2 | 2 | 2  | 0.02% | 5.98%  |
| XTC1-p29 | (P06276) Cholinesterase precursor (EC 3.1.1.8) (Acylocholine acylhydrolase) (Choline esterase II) (Butyrylcholine esterase) (Pseudocholinesterase)                                                                         | CHLE_HUMAN  | 68402 | 100% | 2 | 3 | 6  | 0.05% | 6.98%  |
| XTC1-p29 | (P06576) ATP synthase beta chain, mitochondrial precursor (EC 3.6.3.14)                                                                                                                                                    | ATPB_HUMAN  | 56543 | 100% | 2 | 2 | 2  | 0.02% | 10.20% |
| XTC1-p29 | (P06703) Protein S100-A6 (S100 calcium-binding protein A6) (Calcyclin) (Prolactin receptor-associated protein) (PRA) (Growth factor-inducible protein 2A9) (MLN 4)                                                         | S10A6_HUMAN | 10162 | 100% | 2 | 2 | 2  | 0.02% | 16.70% |
| XTC1-p29 | (P06733) Alpha-enolase (EC 4.2.1.11) (2-phospho-D-glycerate hydro-lyase) (Non-neural enolase) (NNE) (Enolase 1) (Phosphopyruvate hydratase) (C-myc promoter-binding protein) (MBP-1) (MPB-1) (Plasminogen-binding protein) | ENOA_HUMAN  | 47021 | 100% | 6 | 6 | 11 | 0.10% | 19.90% |
| XTC1-p29 | (P06733) Alpha-enolase (EC 4.2.1.11) (2-phospho-D-glycerate hydro-lyase) (Non-neural enolase) (NNE) (Enolase 1) (Phosphopyruvate hydratase) (C-myc promoter-binding protein) (MBP-1) (MPB-1) (Plasminogen-binding protein) | ENOA_HUMAN  | 47021 | 100% | 6 | 6 | 11 | 0.10% | 24.50% |



## Protein Identified Sequence Coverage in XTC-1

|          |                                                                                                                                                                                                                            |            |       |      |   |   |    |       |        |
|----------|----------------------------------------------------------------------------------------------------------------------------------------------------------------------------------------------------------------------------|------------|-------|------|---|---|----|-------|--------|
| XTC1-p29 | (P06733) Alpha-enolase (EC 4.2.1.11) (2-phospho-D-glycerate hydro-lyase) (Non-neural enolase) (NNE) (Enolase 1) (Phosphopyruvate hydratase) (C-myc promoter-binding protein) (MBP-1) (MPB-1) (Plasminogen-binding protein) | ENOA_HUMAN | 47021 | 100% | 4 | 4 | 11 | 0.10% | 17.10% |
| XTC1-p29 | (P06733) Alpha-enolase (EC 4.2.1.11) (2-phospho-D-glycerate hydro-lyase) (Non-neural enolase) (NNE) (Enolase 1) (Phosphopyruvate hydratase) (C-myc promoter-binding protein) (MBP-1) (MPB-1) (Plasminogen-binding protein) | ENOA_HUMAN | 47021 | 100% | 7 | 7 | 8  | 0.07% | 25.60% |
| XTC1-p29 | (P06733) Alpha-enolase (EC 4.2.1.11) (2-phospho-D-glycerate hydro-lyase) (Non-neural enolase) (NNE) (Enolase 1) (Phosphopyruvate hydratase) (C-myc promoter-binding protein) (MBP-1) (MPB-1) (Plasminogen-binding protein) | ENOA_HUMAN | 47021 | 100% | 7 | 7 | 12 | 0.11% | 22.20% |
| XTC1-p29 | (P06733) Alpha-enolase (EC 4.2.1.11) (2-phospho-D-glycerate hydro-lyase) (Non-neural enolase) (NNE) (Enolase 1) (Phosphopyruvate hydratase) (C-myc promoter-binding protein) (MBP-1) (MPB-1) (Plasminogen-binding protein) | ENOA_HUMAN | 47021 | 100% | 2 | 2 | 4  | 0.04% | 12.00% |
| XTC1-p29 | (P06733) Alpha-enolase (EC 4.2.1.11) (2-phospho-D-glycerate hydro-lyase) (Non-neural enolase) (NNE) (Enolase 1) (Phosphopyruvate hydratase) (C-myc promoter-binding protein) (MBP-1) (MPB-1) (Plasminogen-binding protein) | ENOA_HUMAN | 47021 | 100% | 7 | 9 | 10 | 0.09% | 27.30% |
| XTC1-p29 | (P06733) Alpha-enolase (EC 4.2.1.11) (2-phospho-D-glycerate hydro-lyase) (Non-neural enolase) (NNE) (Enolase 1) (Phosphopyruvate hydratase) (C-myc promoter-binding protein) (MBP-1) (MPB-1) (Plasminogen-binding protein) | ENOA_HUMAN | 47021 | 100% | 3 | 4 | 6  | 0.05% | 15.90% |
| XTC1-p29 | (P06733) Alpha-enolase (EC 4.2.1.11) (2-phospho-D-glycerate hydro-lyase) (Non-neural enolase) (NNE) (Enolase 1) (Phosphopyruvate hydratase) (C-myc promoter-binding protein) (MBP-1) (MPB-1) (Plasminogen-binding protein) | ENOA_HUMAN | 47021 | 100% | 3 | 3 | 3  | 0.03% | 15.70% |
| XTC1-p29 | (P06748) Nucleophosmin (NPM) (Nucleolar phosphoprotein B23) (Numatrin) (Nucleolar protein NO38)                                                                                                                            | NPM_HUMAN  | 32557 | 100% | 2 | 2 | 3  | 0.03% | 16.70% |
| XTC1-p29 | (P06748) Nucleophosmin (NPM) (Nucleolar phosphoprotein B23) (Numatrin) (Nucleolar protein NO38)                                                                                                                            | NPM_HUMAN  | 32557 | 100% | 3 | 4 | 7  | 0.06% | 21.40% |
| XTC1-p29 | (P06748) Nucleophosmin (NPM) (Nucleolar phosphoprotein B23) (Numatrin) (Nucleolar protein NO38)                                                                                                                            | NPM_HUMAN  | 32557 | 100% | 2 | 3 | 5  | 0.05% | 16.70% |
| XTC1-p29 | (P06748) Nucleophosmin (NPM) (Nucleolar phosphoprotein B23) (Numatrin) (Nucleolar protein NO38)                                                                                                                            | NPM_HUMAN  | 32557 | 100% | 4 | 4 | 7  | 0.06% | 25.90% |
| XTC1-p29 | (P06748) Nucleophosmin (NPM) (Nucleolar phosphoprotein B23) (Numatrin) (Nucleolar protein NO38)                                                                                                                            | NPM_HUMAN  | 32557 | 100% | 4 | 4 | 5  | 0.04% | 25.90% |
| XTC1-p29 | (P06748) Nucleophosmin (NPM) (Nucleolar phosphoprotein B23) (Numatrin) (Nucleolar protein NO38)                                                                                                                            | NPM_HUMAN  | 32557 | 100% | 2 | 2 | 4  | 0.04% | 13.60% |

## Protein Identified Sequence Coverage in XTC-1

|          |                                                                                                                                                                |            |        |      |   |   |    |       |        |
|----------|----------------------------------------------------------------------------------------------------------------------------------------------------------------|------------|--------|------|---|---|----|-------|--------|
| XTC1-p29 | (P06748) Nucleophosmin (NPM) (Nucleolar phosphoprotein B23) (Numatrin) (Nucleolar protein NO38)                                                                | NPM_HUMAN  | 32557  | 100% | 3 | 5 | 18 | 0.15% | 18.40% |
| XTC1-p29 | (P06748) Nucleophosmin (NPM) (Nucleolar phosphoprotein B23) (Numatrin) (Nucleolar protein NO38)                                                                | NPM_HUMAN  | 32557  | 100% | 3 | 5 | 6  | 0.05% | 18.40% |
| XTC1-p29 | (P06756) Integrin alpha-V precursor (Vitronectin receptor alpha subunit) (CD51 antigen) [Contains: Integrin alpha-V heavy chain; Integrin alpha-V light chain] | ITAV_HUMAN | 116037 | 100% | 2 | 3 | 5  | 0.05% | 3.63%  |
| XTC1-p29 | (P06756) Integrin alpha-V precursor (Vitronectin receptor alpha subunit) (CD51 antigen) [Contains: Integrin alpha-V heavy chain; Integrin alpha-V light chain] | ITAV_HUMAN | 116037 | 100% | 3 | 4 | 4  | 0.04% | 5.44%  |
| XTC1-p29 | (P06756) Integrin alpha-V precursor (Vitronectin receptor alpha subunit) (CD51 antigen) [Contains: Integrin alpha-V heavy chain; Integrin alpha-V light chain] | ITAV_HUMAN | 116037 | 100% | 2 | 3 | 4  | 0.04% | 3.63%  |
| XTC1-p29 | (P06756) Integrin alpha-V precursor (Vitronectin receptor alpha subunit) (CD51 antigen) [Contains: Integrin alpha-V heavy chain; Integrin alpha-V light chain] | ITAV_HUMAN | 116037 | 100% | 2 | 2 | 3  | 0.03% | 3.91%  |
| XTC1-p29 | (P06756) Integrin alpha-V precursor (Vitronectin receptor alpha subunit) (CD51 antigen) [Contains: Integrin alpha-V heavy chain; Integrin alpha-V light chain] | ITAV_HUMAN | 116037 | 100% | 3 | 3 | 6  | 0.06% | 5.73%  |
| XTC1-p29 | (P06756) Integrin alpha-V precursor (Vitronectin receptor alpha subunit) (CD51 antigen) [Contains: Integrin alpha-V heavy chain; Integrin alpha-V light chain] | ITAV_HUMAN | 116037 | 100% | 6 | 6 | 8  | 0.07% | 11.50% |
| XTC1-p29 | (P06756) Integrin alpha-V precursor (Vitronectin receptor alpha subunit) (CD51 antigen) [Contains: Integrin alpha-V heavy chain; Integrin alpha-V light chain] | ITAV_HUMAN | 116037 | 100% | 8 | 8 | 12 | 0.11% | 12.60% |
| XTC1-p29 | (P06756) Integrin alpha-V precursor (Vitronectin receptor alpha subunit) (CD51 antigen) [Contains: Integrin alpha-V heavy chain; Integrin alpha-V light chain] | ITAV_HUMAN | 116037 | 100% | 5 | 5 | 7  | 0.06% | 8.87%  |
| XTC1-p29 | (P06756) Integrin alpha-V precursor (Vitronectin receptor alpha subunit) (CD51 antigen) [Contains: Integrin alpha-V heavy chain; Integrin alpha-V light chain] | ITAV_HUMAN | 116037 | 100% | 8 | 8 | 10 | 0.09% | 11.80% |
| XTC1-p29 | (P06756) Integrin alpha-V precursor (Vitronectin receptor alpha subunit) (CD51 antigen) [Contains: Integrin alpha-V heavy chain; Integrin alpha-V light chain] | ITAV_HUMAN | 116037 | 100% | 5 | 5 | 6  | 0.05% | 6.68%  |
| XTC1-p29 | (P06756) Integrin alpha-V precursor (Vitronectin receptor alpha subunit) (CD51 antigen) [Contains: Integrin alpha-V heavy chain; Integrin alpha-V light chain] | ITAV_HUMAN | 116037 | 100% | 3 | 3 | 5  | 0.05% | 6.77%  |
| XTC1-p29 | (P06756) Integrin alpha-V precursor (Vitronectin receptor alpha subunit) (CD51 antigen) [Contains: Integrin alpha-V heavy chain; Integrin alpha-V light chain] | ITAV_HUMAN | 116037 | 100% | 3 | 4 | 6  | 0.05% | 4.39%  |

## Protein Identified Sequence Coverage in XTC-1

|          |                                                                                                                                                                |            |        |      |    |    |    |       |        |
|----------|----------------------------------------------------------------------------------------------------------------------------------------------------------------|------------|--------|------|----|----|----|-------|--------|
| XTC1-p29 | (P06756) Integrin alpha-V precursor (Vitronectin receptor alpha subunit) (CD51 antigen) [Contains: Integrin alpha-V heavy chain; Integrin alpha-V light chain] | ITAV_HUMAN | 116037 | 100% | 7  | 9  | 21 | 0.18% | 9.64%  |
| XTC1-p29 | (P06756) Integrin alpha-V precursor (Vitronectin receptor alpha subunit) (CD51 antigen) [Contains: Integrin alpha-V heavy chain; Integrin alpha-V light chain] | ITAV_HUMAN | 116037 | 100% | 4  | 5  | 7  | 0.06% | 9.35%  |
| XTC1-p29 | (P06756) Integrin alpha-V precursor (Vitronectin receptor alpha subunit) (CD51 antigen) [Contains: Integrin alpha-V heavy chain; Integrin alpha-V light chain] | ITAV_HUMAN | 116037 | 100% | 5  | 5  | 13 | 0.11% | 10.00% |
| XTC1-p29 | (P06865) Beta-hexosaminidase alpha chain precursor (EC 3.2.1.52) (N-acetyl-beta-glucosaminidase) (Beta-N-acetylhexosaminidase) (Hexosaminidase A)              | HEXA_HUMAN | 60672  | 100% | 2  | 2  | 2  | 0.02% | 3.40%  |
| XTC1-p29 | (P06865) Beta-hexosaminidase alpha chain precursor (EC 3.2.1.52) (N-acetyl-beta-glucosaminidase) (Beta-N-acetylhexosaminidase) (Hexosaminidase A)              | HEXA_HUMAN | 60672  | 100% | 3  | 3  | 3  | 0.03% | 4.16%  |
| XTC1-p29 | (P06865) Beta-hexosaminidase alpha chain precursor (EC 3.2.1.52) (N-acetyl-beta-glucosaminidase) (Beta-N-acetylhexosaminidase) (Hexosaminidase A)              | HEXA_HUMAN | 60672  | 100% | 3  | 3  | 3  | 0.03% | 7.94%  |
| XTC1-p29 | (P06865) Beta-hexosaminidase alpha chain precursor (EC 3.2.1.52) (N-acetyl-beta-glucosaminidase) (Beta-N-acetylhexosaminidase) (Hexosaminidase A)              | HEXA_HUMAN | 60672  | 100% | 7  | 7  | 11 | 0.10% | 17.40% |
| XTC1-p29 | (P06865) Beta-hexosaminidase alpha chain precursor (EC 3.2.1.52) (N-acetyl-beta-glucosaminidase) (Beta-N-acetylhexosaminidase) (Hexosaminidase A)              | HEXA_HUMAN | 60672  | 100% | 10 | 11 | 13 | 0.12% | 23.30% |
| XTC1-p29 | (P06865) Beta-hexosaminidase alpha chain precursor (EC 3.2.1.52) (N-acetyl-beta-glucosaminidase) (Beta-N-acetylhexosaminidase) (Hexosaminidase A)              | HEXA_HUMAN | 60672  | 100% | 9  | 9  | 12 | 0.11% | 19.80% |
| XTC1-p29 | (P06865) Beta-hexosaminidase alpha chain precursor (EC 3.2.1.52) (N-acetyl-beta-glucosaminidase) (Beta-N-acetylhexosaminidase) (Hexosaminidase A)              | HEXA_HUMAN | 60672  | 100% | 4  | 4  | 4  | 0.03% | 9.07%  |
| XTC1-p29 | (P06865) Beta-hexosaminidase alpha chain precursor (EC 3.2.1.52) (N-acetyl-beta-glucosaminidase) (Beta-N-acetylhexosaminidase) (Hexosaminidase A)              | HEXA_HUMAN | 60672  | 100% | 4  | 4  | 4  | 0.03% | 8.88%  |
| XTC1-p29 | (P06865) Beta-hexosaminidase alpha chain precursor (EC 3.2.1.52) (N-acetyl-beta-glucosaminidase) (Beta-N-acetylhexosaminidase) (Hexosaminidase A)              | HEXA_HUMAN | 60672  | 100% | 4  | 5  | 5  | 0.04% | 15.30% |
| XTC1-p29 | (P06865) Beta-hexosaminidase alpha chain precursor (EC 3.2.1.52) (N-acetyl-beta-glucosaminidase) (Beta-N-acetylhexosaminidase) (Hexosaminidase A)              | HEXA_HUMAN | 60672  | 100% | 2  | 2  | 3  | 0.03% | 8.32%  |
| XTC1-p29 | (P07225) Vitamin K-dependent protein S precursor                                                                                                               | PROS_HUMAN | 75105  | 100% | 2  | 3  | 4  | 0.03% | 6.66%  |

## Protein Identified Sequence Coverage in XTC-1

|          |                                                                                                                                                        |             |       |      |    |    |    |       |        |
|----------|--------------------------------------------------------------------------------------------------------------------------------------------------------|-------------|-------|------|----|----|----|-------|--------|
| XTC1-p29 | (P07237) Protein disulfide-isomerase precursor (EC 5.3.4.1) (PDI) (Prolyl 4-hydroxylase beta subunit) (Cellular thyroid hormone-binding protein) (p55) | PDIA1_HUMAN | 57100 | 100% | 10 | 12 | 18 | 0.17% | 28.90% |
| XTC1-p29 | (P07237) Protein disulfide-isomerase precursor (EC 5.3.4.1) (PDI) (Prolyl 4-hydroxylase beta subunit) (Cellular thyroid hormone-binding protein) (p55) | PDIA1_HUMAN | 57100 | 100% | 14 | 15 | 26 | 0.24% | 33.10% |
| XTC1-p29 | (P07237) Protein disulfide-isomerase precursor (EC 5.3.4.1) (PDI) (Prolyl 4-hydroxylase beta subunit) (Cellular thyroid hormone-binding protein) (p55) | PDIA1_HUMAN | 57100 | 100% | 7  | 7  | 8  | 0.07% | 22.80% |
| XTC1-p29 | (P07237) Protein disulfide-isomerase precursor (EC 5.3.4.1) (PDI) (Prolyl 4-hydroxylase beta subunit) (Cellular thyroid hormone-binding protein) (p55) | PDIA1_HUMAN | 57100 | 100% | 16 | 17 | 19 | 0.17% | 37.60% |
| XTC1-p29 | (P07237) Protein disulfide-isomerase precursor (EC 5.3.4.1) (PDI) (Prolyl 4-hydroxylase beta subunit) (Cellular thyroid hormone-binding protein) (p55) | PDIA1_HUMAN | 57100 | 100% | 12 | 13 | 21 | 0.19% | 28.30% |
| XTC1-p29 | (P07237) Protein disulfide-isomerase precursor (EC 5.3.4.1) (PDI) (Prolyl 4-hydroxylase beta subunit) (Cellular thyroid hormone-binding protein) (p55) | PDIA1_HUMAN | 57100 | 100% | 5  | 5  | 8  | 0.08% | 19.70% |
| XTC1-p29 | (P07237) Protein disulfide-isomerase precursor (EC 5.3.4.1) (PDI) (Prolyl 4-hydroxylase beta subunit) (Cellular thyroid hormone-binding protein) (p55) | PDIA1_HUMAN | 57100 | 100% | 4  | 6  | 8  | 0.07% | 15.90% |
| XTC1-p29 | (P07237) Protein disulfide-isomerase precursor (EC 5.3.4.1) (PDI) (Prolyl 4-hydroxylase beta subunit) (Cellular thyroid hormone-binding protein) (p55) | PDIA1_HUMAN | 57100 | 100% | 2  | 4  | 6  | 0.05% | 10.80% |
| XTC1-p29 | (P07237) Protein disulfide-isomerase precursor (EC 5.3.4.1) (PDI) (Prolyl 4-hydroxylase beta subunit) (Cellular thyroid hormone-binding protein) (p55) | PDIA1_HUMAN | 57100 | 100% | 2  | 2  | 3  | 0.03% | 7.48%  |
| XTC1-p29 | (P07237) Protein disulfide-isomerase precursor (EC 5.3.4.1) (PDI) (Prolyl 4-hydroxylase beta subunit) (Cellular thyroid hormone-binding protein) (p55) | PDIA1_HUMAN | 57100 | 100% | 4  | 5  | 9  | 0.08% | 14.20% |
| XTC1-p29 | (P07237) Protein disulfide-isomerase precursor (EC 5.3.4.1) (PDI) (Prolyl 4-hydroxylase beta subunit) (Cellular thyroid hormone-binding protein) (p55) | PDIA1_HUMAN | 57100 | 100% | 2  | 2  | 3  | 0.03% | 9.45%  |
| XTC1-p29 | (P07339) Cathepsin D precursor (EC 3.4.23.5) [Contains: Cathepsin D light chain; Cathepsin D heavy chain]                                              | CATD_HUMAN  | 44535 | 100% | 7  | 8  | 18 | 0.17% | 17.70% |
| XTC1-p29 | (P07339) Cathepsin D precursor (EC 3.4.23.5) [Contains: Cathepsin D light chain; Cathepsin D heavy chain]                                              | CATD_HUMAN  | 44535 | 100% | 8  | 8  | 9  | 0.09% | 22.10% |
| XTC1-p29 | (P07339) Cathepsin D precursor (EC 3.4.23.5) [Contains: Cathepsin D light chain; Cathepsin D heavy chain]                                              | CATD_HUMAN  | 44535 | 100% | 9  | 10 | 21 | 0.20% | 26.90% |

## Protein Identified Sequence Coverage in XTC-1

|          |                                                                                                                                                                   |             |       |      |    |    |     |       |        |
|----------|-------------------------------------------------------------------------------------------------------------------------------------------------------------------|-------------|-------|------|----|----|-----|-------|--------|
| XTC1-p29 | (P07339) Cathepsin D precursor (EC 3.4.23.5)<br>[Contains: Cathepsin D light chain; Cathepsin D heavy chain]                                                      | CATD_HUMAN  | 44535 | 100% | 8  | 9  | 17  | 0.16% | 21.60% |
| XTC1-p29 | (P07339) Cathepsin D precursor (EC 3.4.23.5)<br>[Contains: Cathepsin D light chain; Cathepsin D heavy chain]                                                      | CATD_HUMAN  | 44535 | 100% | 3  | 3  | 4   | 0.04% | 15.00% |
| XTC1-p29 | (P07339) Cathepsin D precursor (EC 3.4.23.5)<br>[Contains: Cathepsin D light chain; Cathepsin D heavy chain]                                                      | CATD_HUMAN  | 44535 | 100% | 15 | 20 | 55  | 0.51% | 55.80% |
| XTC1-p29 | (P07339) Cathepsin D precursor (EC 3.4.23.5)<br>[Contains: Cathepsin D light chain; Cathepsin D heavy chain]                                                      | CATD_HUMAN  | 44535 | 100% | 19 | 23 | 57  | 0.53% | 58.50% |
| XTC1-p29 | (P07339) Cathepsin D precursor (EC 3.4.23.5)<br>[Contains: Cathepsin D light chain; Cathepsin D heavy chain]                                                      | CATD_HUMAN  | 44535 | 100% | 15 | 20 | 96  | 0.88% | 54.10% |
| XTC1-p29 | (P07339) Cathepsin D precursor (EC 3.4.23.5)<br>[Contains: Cathepsin D light chain; Cathepsin D heavy chain]                                                      | CATD_HUMAN  | 44535 | 100% | 19 | 24 | 77  | 0.69% | 60.70% |
| XTC1-p29 | (P07339) Cathepsin D precursor (EC 3.4.23.5)<br>[Contains: Cathepsin D light chain; Cathepsin D heavy chain]                                                      | CATD_HUMAN  | 44535 | 100% | 16 | 18 | 68  | 0.60% | 51.70% |
| XTC1-p29 | (P07339) Cathepsin D precursor (EC 3.4.23.5)<br>[Contains: Cathepsin D light chain; Cathepsin D heavy chain]                                                      | CATD_HUMAN  | 44535 | 100% | 5  | 5  | 21  | 0.20% | 31.80% |
| XTC1-p29 | (P07339) Cathepsin D precursor (EC 3.4.23.5)<br>[Contains: Cathepsin D light chain; Cathepsin D heavy chain]                                                      | CATD_HUMAN  | 44535 | 100% | 13 | 16 | 62  | 0.53% | 44.70% |
| XTC1-p29 | (P07339) Cathepsin D precursor (EC 3.4.23.5)<br>[Contains: Cathepsin D light chain; Cathepsin D heavy chain]                                                      | CATD_HUMAN  | 44535 | 100% | 4  | 7  | 15  | 0.13% | 21.60% |
| XTC1-p29 | (P07339) Cathepsin D precursor (EC 3.4.23.5)<br>[Contains: Cathepsin D light chain; Cathepsin D heavy chain]                                                      | CATD_HUMAN  | 44535 | 100% | 7  | 10 | 113 | 0.96% | 27.40% |
| XTC1-p29 | (P07339) Cathepsin D precursor (EC 3.4.23.5)<br>[Contains: Cathepsin D light chain; Cathepsin D heavy chain]                                                      | CATD_HUMAN  | 44535 | 100% | 4  | 5  | 7   | 0.06% | 21.60% |
| XTC1-p29 | (P07339) Cathepsin D precursor (EC 3.4.23.5)<br>[Contains: Cathepsin D light chain; Cathepsin D heavy chain]                                                      | CATD_HUMAN  | 44535 | 100% | 4  | 6  | 55  | 0.49% | 19.70% |
| XTC1-p29 | (P07339) Cathepsin D precursor (EC 3.4.23.5)<br>[Contains: Cathepsin D light chain; Cathepsin D heavy chain]                                                      | CATD_HUMAN  | 44535 | 100% | 5  | 7  | 22  | 0.19% | 23.30% |
| XTC1-p29 | (P07339) Cathepsin D precursor (EC 3.4.23.5)<br>[Contains: Cathepsin D light chain; Cathepsin D heavy chain]                                                      | CATD_HUMAN  | 44535 | 100% | 3  | 5  | 78  | 0.69% | 24.80% |
| XTC1-p29 | (P07355) Annexin A2 (Annexin II) (Lipocortin II)<br>(Calpactin I heavy chain) (Chromobindin-8) (p36)<br>(Protein I) (Placental anticoagulant protein IV) (PAP-IV) | ANXA2_HUMAN | 38457 | 100% | 8  | 11 | 15  | 0.14% | 32.20% |
| XTC1-p29 | (P07355) Annexin A2 (Annexin II) (Lipocortin II)<br>(Calpactin I heavy chain) (Chromobindin-8) (p36)<br>(Protein I) (Placental anticoagulant protein IV) (PAP-IV) | ANXA2_HUMAN | 38457 | 100% | 13 | 17 | 28  | 0.26% | 43.20% |

Protein Identified Sequence Coverage in XTC-1

|          |                                                                                                                                                                                                                                                      |             |       |      |    |    |    |       |        |
|----------|------------------------------------------------------------------------------------------------------------------------------------------------------------------------------------------------------------------------------------------------------|-------------|-------|------|----|----|----|-------|--------|
| XTC1-p29 | (P07355) Annexin A2 (Annexin II) (Lipocortin II) (Calpactin I heavy chain) (Chromobindin-8) (p36) (Protein I) (Placental anticoagulant protein IV) (PAP-IV)                                                                                          | ANXA2_HUMAN | 38457 | 100% | 9  | 11 | 14 | 0.13% | 34.30% |
| XTC1-p29 | (P07355) Annexin A2 (Annexin II) (Lipocortin II) (Calpactin I heavy chain) (Chromobindin-8) (p36) (Protein I) (Placental anticoagulant protein IV) (PAP-IV)                                                                                          | ANXA2_HUMAN | 38457 | 100% | 15 | 18 | 24 | 0.21% | 51.80% |
| XTC1-p29 | (P07355) Annexin A2 (Annexin II) (Lipocortin II) (Calpactin I heavy chain) (Chromobindin-8) (p36) (Protein I) (Placental anticoagulant protein IV) (PAP-IV)                                                                                          | ANXA2_HUMAN | 38457 | 100% | 9  | 13 | 21 | 0.19% | 30.20% |
| XTC1-p29 | (P07355) Annexin A2 (Annexin II) (Lipocortin II) (Calpactin I heavy chain) (Chromobindin-8) (p36) (Protein I) (Placental anticoagulant protein IV) (PAP-IV)                                                                                          | ANXA2_HUMAN | 38457 | 100% | 2  | 2  | 4  | 0.04% | 10.90% |
| XTC1-p29 | (P07355) Annexin A2 (Annexin II) (Lipocortin II) (Calpactin I heavy chain) (Chromobindin-8) (p36) (Protein I) (Placental anticoagulant protein IV) (PAP-IV)                                                                                          | ANXA2_HUMAN | 38457 | 100% | 8  | 9  | 14 | 0.12% | 28.40% |
| XTC1-p29 | (P07355) Annexin A2 (Annexin II) (Lipocortin II) (Calpactin I heavy chain) (Chromobindin-8) (p36) (Protein I) (Placental anticoagulant protein IV) (PAP-IV)                                                                                          | ANXA2_HUMAN | 38457 | 100% | 3  | 4  | 8  | 0.07% | 11.80% |
| XTC1-p29 | (P07355) Annexin A2 (Annexin II) (Lipocortin II) (Calpactin I heavy chain) (Chromobindin-8) (p36) (Protein I) (Placental anticoagulant protein IV) (PAP-IV)                                                                                          | ANXA2_HUMAN | 38457 | 100% | 3  | 3  | 3  | 0.03% | 15.70% |
| XTC1-p29 | (P07355) Annexin A2 (Annexin II) (Lipocortin II) (Calpactin I heavy chain) (Chromobindin-8) (p36) (Protein I) (Placental anticoagulant protein IV) (PAP-IV)                                                                                          | ANXA2_HUMAN | 38457 | 100% | 2  | 3  | 5  | 0.04% | 10.40% |
| XTC1-p29 | (P07355) Annexin A2 (Annexin II) (Lipocortin II) (Calpactin I heavy chain) (Chromobindin-8) (p36) (Protein I) (Placental anticoagulant protein IV) (PAP-IV)                                                                                          | ANXA2_HUMAN | 38457 | 100% | 2  | 3  | 9  | 0.08% | 11.80% |
| XTC1-p29 | (P07437) Tubulin beta-2 chain                                                                                                                                                                                                                        | TBB2_HUMAN  | 49653 | 100% | 4  | 4  | 6  | 0.06% | 18.90% |
| XTC1-p29 | (P07437) Tubulin beta-2 chain                                                                                                                                                                                                                        | TBB2_HUMAN  | 49653 | 100% | 2  | 2  | 2  | 0.02% | 9.68%  |
| XTC1-p29 | (P07437) Tubulin beta-2 chain                                                                                                                                                                                                                        | TBB2_HUMAN  | 49653 | 100% | 3  | 3  | 3  | 0.03% | 12.80% |
| XTC1-p29 | (P07437) Tubulin beta-2 chain                                                                                                                                                                                                                        | TBB2_HUMAN  | 49653 | 100% | 7  | 9  | 12 | 0.11% | 28.60% |
| XTC1-p29 | (P07437) Tubulin beta-2 chain                                                                                                                                                                                                                        | TBB2_HUMAN  | 49653 | 100% | 2  | 3  | 6  | 0.05% | 9.01%  |
| XTC1-p29 | (P07437) Tubulin beta-2 chain                                                                                                                                                                                                                        | TBB2_HUMAN  | 49653 | 100% | 4  | 4  | 6  | 0.05% | 11.70% |
| XTC1-p29 | (P07437) Tubulin beta-2 chain                                                                                                                                                                                                                        | TBB2_HUMAN  | 49653 | 100% | 2  | 4  | 8  | 0.07% | 9.68%  |
| XTC1-p29 | (P07602) Proactivator polypeptide precursor [Contains: Saposin A (Protein A); Saposin B-Val; Saposin B (Sphingolipid activator protein 1) (SAP-1) (Cerebroside sulfate activator) (CSAct) (Dispersin) (Sulfatide/GM1 activator); Saposin C (Co-beta- | SAP_HUMAN   | 58094 | 100% | 12 | 17 | 46 | 0.44% | 22.50% |
| XTC1-p29 | (P07602) Proactivator polypeptide precursor [Contains: Saposin A (Protein A); Saposin B-Val; Saposin B (Sphingolipid activator protein 1) (SAP-1) (Cerebroside sulfate activator) (CSAct) (Dispersin) (Sulfatide/GM1 activator); Saposin C (Co-beta- | SAP_HUMAN   | 58094 | 100% | 12 | 17 | 33 | 0.32% | 25.60% |

## Protein Identified Sequence Coverage in XTC-1

|          |                                                                                                                                                                                                                                                                  |           |       |      |    |    |     |       |        |
|----------|------------------------------------------------------------------------------------------------------------------------------------------------------------------------------------------------------------------------------------------------------------------|-----------|-------|------|----|----|-----|-------|--------|
| XTC1-p29 | (P07602) Proactivator polypeptide precursor<br>[Contains: Saposin A (Protein A); Saposin B-Val;<br>Saposin B (Sphingolipid activator protein 1) (SAP-1)<br>(Cerebroside sulfate activator) (CSAct) (Dispersin)<br>(Sulfatide/GM1 activator); Saposin C (Co-beta- | SAP_HUMAN | 58094 | 100% | 14 | 20 | 66  | 0.61% | 23.30% |
| XTC1-p29 | (P07602) Proactivator polypeptide precursor<br>[Contains: Saposin A (Protein A); Saposin B-Val;<br>Saposin B (Sphingolipid activator protein 1) (SAP-1)<br>(Cerebroside sulfate activator) (CSAct) (Dispersin)<br>(Sulfatide/GM1 activator); Saposin C (Co-beta- | SAP_HUMAN | 58094 | 100% | 9  | 12 | 38  | 0.35% | 20.60% |
| XTC1-p29 | (P07602) Proactivator polypeptide precursor<br>[Contains: Saposin A (Protein A); Saposin B-Val;<br>Saposin B (Sphingolipid activator protein 1) (SAP-1)<br>(Cerebroside sulfate activator) (CSAct) (Dispersin)<br>(Sulfatide/GM1 activator); Saposin C (Co-beta- | SAP_HUMAN | 58094 | 100% | 4  | 4  | 11  | 0.11% | 13.20% |
| XTC1-p29 | (P07602) Proactivator polypeptide precursor<br>[Contains: Saposin A (Protein A); Saposin B-Val;<br>Saposin B (Sphingolipid activator protein 1) (SAP-1)<br>(Cerebroside sulfate activator) (CSAct) (Dispersin)<br>(Sulfatide/GM1 activator); Saposin C (Co-beta- | SAP_HUMAN | 58094 | 100% | 14 | 16 | 45  | 0.41% | 37.20% |
| XTC1-p29 | (P07602) Proactivator polypeptide precursor<br>[Contains: Saposin A (Protein A); Saposin B-Val;<br>Saposin B (Sphingolipid activator protein 1) (SAP-1)<br>(Cerebroside sulfate activator) (CSAct) (Dispersin)<br>(Sulfatide/GM1 activator); Saposin C (Co-beta- | SAP_HUMAN | 58094 | 100% | 14 | 17 | 57  | 0.53% | 35.70% |
| XTC1-p29 | (P07602) Proactivator polypeptide precursor<br>[Contains: Saposin A (Protein A); Saposin B-Val;<br>Saposin B (Sphingolipid activator protein 1) (SAP-1)<br>(Cerebroside sulfate activator) (CSAct) (Dispersin)<br>(Sulfatide/GM1 activator); Saposin C (Co-beta- | SAP_HUMAN | 58094 | 100% | 12 | 14 | 110 | 1.00% | 32.10% |
| XTC1-p29 | (P07602) Proactivator polypeptide precursor<br>[Contains: Saposin A (Protein A); Saposin B-Val;<br>Saposin B (Sphingolipid activator protein 1) (SAP-1)<br>(Cerebroside sulfate activator) (CSAct) (Dispersin)<br>(Sulfatide/GM1 activator); Saposin C (Co-beta- | SAP_HUMAN | 58094 | 100% | 18 | 21 | 90  | 0.80% | 42.20% |
| XTC1-p29 | (P07602) Proactivator polypeptide precursor<br>[Contains: Saposin A (Protein A); Saposin B-Val;<br>Saposin B (Sphingolipid activator protein 1) (SAP-1)<br>(Cerebroside sulfate activator) (CSAct) (Dispersin)<br>(Sulfatide/GM1 activator); Saposin C (Co-beta- | SAP_HUMAN | 58094 | 100% | 14 | 16 | 59  | 0.52% | 32.10% |
| XTC1-p29 | (P07602) Proactivator polypeptide precursor<br>[Contains: Saposin A (Protein A); Saposin B-Val;<br>Saposin B (Sphingolipid activator protein 1) (SAP-1)<br>(Cerebroside sulfate activator) (CSAct) (Dispersin)<br>(Sulfatide/GM1 activator); Saposin C (Co-beta- | SAP_HUMAN | 58094 | 100% | 5  | 5  | 14  | 0.13% | 23.10% |

## Protein Identified Sequence Coverage in XTC-1

|          |                                                                                                                                                                                                                                                                     |            |       |      |    |    |    |       |        |
|----------|---------------------------------------------------------------------------------------------------------------------------------------------------------------------------------------------------------------------------------------------------------------------|------------|-------|------|----|----|----|-------|--------|
| XTC1-p29 | (P07602) Proactivator polypeptide precursor<br>[Contains: Saposin A (Protein A); Saposin B-Val;<br>Saposin B (Sphingolipid activator protein 1) (SAP-1)<br>(Cerebroside sulfate activator) (CSAct) (Dispersin)<br>(Sulfatide/GM1 activator); Saposin C (Co-beta-    | SAP_HUMAN  | 58094 | 100% | 9  | 11 | 63 | 0.54% | 25.60% |
| XTC1-p29 | (P07602) Proactivator polypeptide precursor<br>[Contains: Saposin A (Protein A); Saposin B-Val;<br>Saposin B (Sphingolipid activator protein 1) (SAP-1)<br>(Cerebroside sulfate activator) (CSAct) (Dispersin)<br>(Sulfatide/GM1 activator); Saposin C (Co-beta-    | SAP_HUMAN  | 58094 | 100% | 11 | 13 | 97 | 0.82% | 38.70% |
| XTC1-p29 | (P07602) Proactivator polypeptide precursor<br>[Contains: Saposin A (Protein A); Saposin B-Val;<br>Saposin B (Sphingolipid activator protein 1) (SAP-1)<br>(Cerebroside sulfate activator) (CSAct) (Dispersin)<br>(Sulfatide/GM1 activator); Saposin C (Co-beta-    | SAP_HUMAN  | 58094 | 100% | 4  | 5  | 9  | 0.08% | 17.60% |
| XTC1-p29 | (P07602) Proactivator polypeptide precursor<br>[Contains: Saposin A (Protein A); Saposin B-Val;<br>Saposin B (Sphingolipid activator protein 1) (SAP-1)<br>(Cerebroside sulfate activator) (CSAct) (Dispersin)<br>(Sulfatide/GM1 activator); Saposin C (Co-beta-    | SAP_HUMAN  | 58094 | 100% | 6  | 9  | 27 | 0.23% | 22.70% |
| XTC1-p29 | (P07602) Proactivator polypeptide precursor<br>[Contains: Saposin A (Protein A); Saposin B-Val;<br>Saposin B (Sphingolipid activator protein 1) (SAP-1)<br>(Cerebroside sulfate activator) (CSAct) (Dispersin)<br>(Sulfatide/GM1 activator); Saposin C (Co-beta-    | SAP_HUMAN  | 58094 | 100% | 4  | 4  | 7  | 0.06% | 18.90% |
| XTC1-p29 | (P07686) Beta-hexosaminidase beta chain precursor<br>(EC 3.2.1.52) (N-acetyl-beta-glucosaminidase) (Beta<br>N-acetylhexosaminidase) (Hexosaminidase B)<br>(Cervical cancer proto-oncogene 7) (HCC-7)<br>[Contains: Beta-hexosaminidase beta-B chain; Beta-<br>hexos | HEXB_HUMAN | 63095 | 100% | 2  | 2  | 4  | 0.04% | 6.47%  |
| XTC1-p29 | (P07686) Beta-hexosaminidase beta chain precursor<br>(EC 3.2.1.52) (N-acetyl-beta-glucosaminidase) (Beta<br>N-acetylhexosaminidase) (Hexosaminidase B)<br>(Cervical cancer proto-oncogene 7) (HCC-7)<br>[Contains: Beta-hexosaminidase beta-B chain; Beta-<br>hexos | HEXB_HUMAN | 63095 | 100% | 2  | 2  | 4  | 0.04% | 6.47%  |
| XTC1-p29 | (P07686) Beta-hexosaminidase beta chain precursor<br>(EC 3.2.1.52) (N-acetyl-beta-glucosaminidase) (Beta<br>N-acetylhexosaminidase) (Hexosaminidase B)<br>(Cervical cancer proto-oncogene 7) (HCC-7)<br>[Contains: Beta-hexosaminidase beta-B chain; Beta-<br>hexos | HEXB_HUMAN | 63095 | 100% | 4  | 4  | 8  | 0.07% | 15.50% |



Protein Identified Sequence Coverage in XTC-1

|          |                                                                                                                                                                                                                                                     |            |       |      |    |    |    |       |        |
|----------|-----------------------------------------------------------------------------------------------------------------------------------------------------------------------------------------------------------------------------------------------------|------------|-------|------|----|----|----|-------|--------|
| XTC1-p29 | (P07686) Beta-hexosaminidase beta chain precursor (EC 3.2.1.52) (N-acetyl-beta-glucosaminidase) (Beta-N-acetylhexosaminidase) (Hexosaminidase B) (Cervical cancer proto-oncogene 7) (HCC-7) [Contains: Beta-hexosaminidase beta-B chain; Beta-hexos | HEXB_HUMAN | 63095 | 100% | 2  | 2  | 8  | 0.08% | 6.47%  |
| XTC1-p29 | (P07686) Beta-hexosaminidase beta chain precursor (EC 3.2.1.52) (N-acetyl-beta-glucosaminidase) (Beta-N-acetylhexosaminidase) (Hexosaminidase B) (Cervical cancer proto-oncogene 7) (HCC-7) [Contains: Beta-hexosaminidase beta-B chain; Beta-hexos | HEXB_HUMAN | 63095 | 100% | 11 | 11 | 19 | 0.18% | 28.60% |
| XTC1-p29 | (P07686) Beta-hexosaminidase beta chain precursor (EC 3.2.1.52) (N-acetyl-beta-glucosaminidase) (Beta-N-acetylhexosaminidase) (Hexosaminidase B) (Cervical cancer proto-oncogene 7) (HCC-7) [Contains: Beta-hexosaminidase beta-B chain; Beta-hexos | HEXB_HUMAN | 63095 | 100% | 13 | 14 | 23 | 0.21% | 31.10% |
| XTC1-p29 | (P07686) Beta-hexosaminidase beta chain precursor (EC 3.2.1.52) (N-acetyl-beta-glucosaminidase) (Beta-N-acetylhexosaminidase) (Hexosaminidase B) (Cervical cancer proto-oncogene 7) (HCC-7) [Contains: Beta-hexosaminidase beta-B chain; Beta-hexos | HEXB_HUMAN | 63095 | 100% | 11 | 12 | 27 | 0.25% | 27.90% |
| XTC1-p29 | (P07686) Beta-hexosaminidase beta chain precursor (EC 3.2.1.52) (N-acetyl-beta-glucosaminidase) (Beta-N-acetylhexosaminidase) (Hexosaminidase B) (Cervical cancer proto-oncogene 7) (HCC-7) [Contains: Beta-hexosaminidase beta-B chain; Beta-hexos | HEXB_HUMAN | 63095 | 100% | 14 | 16 | 28 | 0.25% | 31.30% |
| XTC1-p29 | (P07686) Beta-hexosaminidase beta chain precursor (EC 3.2.1.52) (N-acetyl-beta-glucosaminidase) (Beta-N-acetylhexosaminidase) (Hexosaminidase B) (Cervical cancer proto-oncogene 7) (HCC-7) [Contains: Beta-hexosaminidase beta-B chain; Beta-hexos | HEXB_HUMAN | 63095 | 100% | 10 | 11 | 20 | 0.18% | 20.90% |
| XTC1-p29 | (P07686) Beta-hexosaminidase beta chain precursor (EC 3.2.1.52) (N-acetyl-beta-glucosaminidase) (Beta-N-acetylhexosaminidase) (Hexosaminidase B) (Cervical cancer proto-oncogene 7) (HCC-7) [Contains: Beta-hexosaminidase beta-B chain; Beta-hexos | HEXB_HUMAN | 63095 | 100% | 3  | 3  | 6  | 0.06% | 12.80% |

## Protein Identified Sequence Coverage in XTC-1

|          |                                                                                                                                                                                                                                                     |            |       |      |   |    |    |       |        |
|----------|-----------------------------------------------------------------------------------------------------------------------------------------------------------------------------------------------------------------------------------------------------|------------|-------|------|---|----|----|-------|--------|
| XTC1-p29 | (P07686) Beta-hexosaminidase beta chain precursor (EC 3.2.1.52) (N-acetyl-beta-glucosaminidase) (Beta-N-acetylhexosaminidase) (Hexosaminidase B) (Cervical cancer proto-oncogene 7) (HCC-7) [Contains: Beta-hexosaminidase beta-B chain; Beta-hexos | HEXB_HUMAN | 63095 | 100% | 8 | 10 | 19 | 0.16% | 19.20% |
| XTC1-p29 | (P07686) Beta-hexosaminidase beta chain precursor (EC 3.2.1.52) (N-acetyl-beta-glucosaminidase) (Beta-N-acetylhexosaminidase) (Hexosaminidase B) (Cervical cancer proto-oncogene 7) (HCC-7) [Contains: Beta-hexosaminidase beta-B chain; Beta-hexos | HEXB_HUMAN | 63095 | 100% | 3 | 3  | 6  | 0.05% | 8.27%  |
| XTC1-p29 | (P07686) Beta-hexosaminidase beta chain precursor (EC 3.2.1.52) (N-acetyl-beta-glucosaminidase) (Beta-N-acetylhexosaminidase) (Hexosaminidase B) (Cervical cancer proto-oncogene 7) (HCC-7) [Contains: Beta-hexosaminidase beta-B chain; Beta-hexos | HEXB_HUMAN | 63095 | 100% | 2 | 3  | 4  | 0.04% | 7.91%  |
| XTC1-p29 | (P07686) Beta-hexosaminidase beta chain precursor (EC 3.2.1.52) (N-acetyl-beta-glucosaminidase) (Beta-N-acetylhexosaminidase) (Hexosaminidase B) (Cervical cancer proto-oncogene 7) (HCC-7) [Contains: Beta-hexosaminidase beta-B chain; Beta-hexos | HEXB_HUMAN | 63095 | 100% | 3 | 4  | 13 | 0.11% | 10.30% |
| XTC1-p29 | (P07711) Cathepsin L precursor (EC 3.4.22.15) (Major excreted protein) (MEP) [Contains: Cathepsin L heavy chain; Cathepsin L light chain]                                                                                                           | CATL_HUMAN | 37546 | 100% | 3 | 3  | 4  | 0.04% | 6.31%  |
| XTC1-p29 | (P07711) Cathepsin L precursor (EC 3.4.22.15) (Major excreted protein) (MEP) [Contains: Cathepsin L heavy chain; Cathepsin L light chain]                                                                                                           | CATL_HUMAN | 37546 | 100% | 2 | 3  | 6  | 0.06% | 5.11%  |
| XTC1-p29 | (P07711) Cathepsin L precursor (EC 3.4.22.15) (Major excreted protein) (MEP) [Contains: Cathepsin L heavy chain; Cathepsin L light chain]                                                                                                           | CATL_HUMAN | 37546 | 100% | 2 | 3  | 6  | 0.05% | 5.11%  |
| XTC1-p29 | (P07711) Cathepsin L precursor (EC 3.4.22.15) (Major excreted protein) (MEP) [Contains: Cathepsin L heavy chain; Cathepsin L light chain]                                                                                                           | CATL_HUMAN | 37546 | 100% | 5 | 5  | 6  | 0.06% | 24.00% |
| XTC1-p29 | (P07711) Cathepsin L precursor (EC 3.4.22.15) (Major excreted protein) (MEP) [Contains: Cathepsin L heavy chain; Cathepsin L light chain]                                                                                                           | CATL_HUMAN | 37546 | 100% | 4 | 4  | 7  | 0.06% | 21.00% |
| XTC1-p29 | (P07711) Cathepsin L precursor (EC 3.4.22.15) (Major excreted protein) (MEP) [Contains: Cathepsin L heavy chain; Cathepsin L light chain]                                                                                                           | CATL_HUMAN | 37546 | 100% | 6 | 7  | 19 | 0.17% | 37.50% |

## Protein Identified Sequence Coverage in XTC-1

|          |                                                                                                                                                    |             |       |      |    |    |    |       |        |
|----------|----------------------------------------------------------------------------------------------------------------------------------------------------|-------------|-------|------|----|----|----|-------|--------|
| XTC1-p29 | (P07711) Cathepsin L precursor (EC 3.4.22.15)<br>(Major excreted protein) (MEP) [Contains: Cathepsin L heavy chain; Cathepsin L light chain]       | CATL_HUMAN  | 37546 | 100% | 10 | 12 | 15 | 0.13% | 50.50% |
| XTC1-p29 | (P07711) Cathepsin L precursor (EC 3.4.22.15)<br>(Major excreted protein) (MEP) [Contains: Cathepsin L heavy chain; Cathepsin L light chain]       | CATL_HUMAN  | 37546 | 100% | 5  | 5  | 11 | 0.10% | 23.40% |
| XTC1-p29 | (P07711) Cathepsin L precursor (EC 3.4.22.15)<br>(Major excreted protein) (MEP) [Contains: Cathepsin L heavy chain; Cathepsin L light chain]       | CATL_HUMAN  | 37546 | 100% | 4  | 4  | 13 | 0.12% | 29.70% |
| XTC1-p29 | (P07711) Cathepsin L precursor (EC 3.4.22.15)<br>(Major excreted protein) (MEP) [Contains: Cathepsin L heavy chain; Cathepsin L light chain]       | CATL_HUMAN  | 37546 | 100% | 3  | 3  | 3  | 0.03% | 12.00% |
| XTC1-p29 | (P07711) Cathepsin L precursor (EC 3.4.22.15)<br>(Major excreted protein) (MEP) [Contains: Cathepsin L heavy chain; Cathepsin L light chain]       | CATL_HUMAN  | 37546 | 100% | 3  | 4  | 18 | 0.15% | 15.30% |
| XTC1-p29 | (P07711) Cathepsin L precursor (EC 3.4.22.15)<br>(Major excreted protein) (MEP) [Contains: Cathepsin L heavy chain; Cathepsin L light chain]       | CATL_HUMAN  | 37546 | 100% | 2  | 2  | 6  | 0.05% | 14.40% |
| XTC1-p29 | (P07711) Cathepsin L precursor (EC 3.4.22.15)<br>(Major excreted protein) (MEP) [Contains: Cathepsin L heavy chain; Cathepsin L light chain]       | CATL_HUMAN  | 37546 | 100% | 2  | 3  | 4  | 0.03% | 15.90% |
| XTC1-p29 | (P07711) Cathepsin L precursor (EC 3.4.22.15)<br>(Major excreted protein) (MEP) [Contains: Cathepsin L heavy chain; Cathepsin L light chain]       | CATL_HUMAN  | 37546 | 100% | 2  | 2  | 7  | 0.06% | 12.60% |
| XTC1-p29 | (P07737) Profilin-1 (Profilin I)                                                                                                                   | PROF1_HUMAN | 14905 | 100% | 3  | 3  | 4  | 0.04% | 31.70% |
| XTC1-p29 | (P07858) Cathepsin B precursor (EC 3.4.22.1)<br>(Cathepsin B1) (APP secretase) (APPS) [Contains: Cathepsin B light chain; Cathepsin B heavy chain] | CATB_HUMAN  | 37803 | 100% | 6  | 7  | 18 | 0.17% | 28.00% |
| XTC1-p29 | (P07858) Cathepsin B precursor (EC 3.4.22.1)<br>(Cathepsin B1) (APP secretase) (APPS) [Contains: Cathepsin B light chain; Cathepsin B heavy chain] | CATB_HUMAN  | 37803 | 100% | 7  | 10 | 22 | 0.20% | 36.00% |
| XTC1-p29 | (P07858) Cathepsin B precursor (EC 3.4.22.1)<br>(Cathepsin B1) (APP secretase) (APPS) [Contains: Cathepsin B light chain; Cathepsin B heavy chain] | CATB_HUMAN  | 37803 | 100% | 5  | 5  | 12 | 0.11% | 25.70% |
| XTC1-p29 | (P07858) Cathepsin B precursor (EC 3.4.22.1)<br>(Cathepsin B1) (APP secretase) (APPS) [Contains: Cathepsin B light chain; Cathepsin B heavy chain] | CATB_HUMAN  | 37803 | 100% | 8  | 9  | 22 | 0.20% | 33.90% |
| XTC1-p29 | (P07858) Cathepsin B precursor (EC 3.4.22.1)<br>(Cathepsin B1) (APP secretase) (APPS) [Contains: Cathepsin B light chain; Cathepsin B heavy chain] | CATB_HUMAN  | 37803 | 100% | 6  | 8  | 15 | 0.13% | 22.70% |

## Protein Identified Sequence Coverage in XTC-1

|          |                                                                                                                                                  |             |        |      |   |   |    |       |        |
|----------|--------------------------------------------------------------------------------------------------------------------------------------------------|-------------|--------|------|---|---|----|-------|--------|
| XTC1-p29 | (P07858) Cathepsin B precursor (EC 3.4.22.1) (Cathepsin B1) (APP secretase) (APPS) [Contains: Cathepsin B light chain; Cathepsin B heavy chain]  | CATB_HUMAN  | 37803  | 100% | 2 | 2 | 8  | 0.08% | 11.80% |
| XTC1-p29 | (P07858) Cathepsin B precursor (EC 3.4.22.1) (Cathepsin B1) (APP secretase) (APPS) [Contains: Cathepsin B light chain; Cathepsin B heavy chain]  | CATB_HUMAN  | 37803  | 100% | 3 | 4 | 11 | 0.09% | 14.50% |
| XTC1-p29 | (P07858) Cathepsin B precursor (EC 3.4.22.1) (Cathepsin B1) (APP secretase) (APPS) [Contains: Cathepsin B light chain; Cathepsin B heavy chain]  | CATB_HUMAN  | 37803  | 100% | 2 | 2 | 8  | 0.07% | 11.20% |
| XTC1-p29 | (P07942) Laminin beta-1 chain precursor (Laminin B1 chain)                                                                                       | LAMB1_HUMAN | 198045 | 100% | 2 | 2 | 2  | 0.02% | 2.91%  |
| XTC1-p29 | (P07942) Laminin beta-1 chain precursor (Laminin B1 chain)                                                                                       | LAMB1_HUMAN | 198045 | 100% | 2 | 2 | 2  | 0.02% | 2.91%  |
| XTC1-p29 | (P07942) Laminin beta-1 chain precursor (Laminin B1 chain)                                                                                       | LAMB1_HUMAN | 198045 | 100% | 4 | 5 | 5  | 0.04% | 4.87%  |
| XTC1-p29 | (P07942) Laminin beta-1 chain precursor (Laminin B1 chain)                                                                                       | LAMB1_HUMAN | 198045 | 100% | 3 | 3 | 4  | 0.04% | 3.42%  |
| XTC1-p29 | (P07942) Laminin beta-1 chain precursor (Laminin B1 chain)                                                                                       | LAMB1_HUMAN | 198045 | 100% | 3 | 3 | 5  | 0.05% | 4.48%  |
| XTC1-p29 | (P07942) Laminin beta-1 chain precursor (Laminin B1 chain)                                                                                       | LAMB1_HUMAN | 198045 | 100% | 2 | 2 | 2  | 0.02% | 2.07%  |
| XTC1-p29 | (P07942) Laminin beta-1 chain precursor (Laminin B1 chain)                                                                                       | LAMB1_HUMAN | 198045 | 100% | 3 | 4 | 8  | 0.07% | 4.59%  |
| XTC1-p29 | (P08174) Complement decay-accelerating factor precursor (CD55 antigen)                                                                           | DAF_HUMAN   | 41382  | 100% | 3 | 3 | 3  | 0.03% | 15.70% |
| XTC1-p29 | (P08174) Complement decay-accelerating factor precursor (CD55 antigen)                                                                           | DAF_HUMAN   | 41382  | 100% | 3 | 3 | 5  | 0.05% | 12.90% |
| XTC1-p29 | (P08174) Complement decay-accelerating factor precursor (CD55 antigen)                                                                           | DAF_HUMAN   | 41382  | 100% | 4 | 4 | 5  | 0.04% | 17.80% |
| XTC1-p29 | (P08174) Complement decay-accelerating factor precursor (CD55 antigen)                                                                           | DAF_HUMAN   | 41382  | 100% | 3 | 3 | 4  | 0.03% | 10.50% |
| XTC1-p29 | (P08195) 4F2 cell-surface antigen heavy chain (4F2hc) (Lymphocyte activation antigen 4F2 large subunit) (4F2 heavy chain antigen) (CD98 antigen) | 4F2_HUMAN   | 57929  | 100% | 2 | 2 | 3  | 0.03% | 6.81%  |
| XTC1-p29 | (P08195) 4F2 cell-surface antigen heavy chain (4F2hc) (Lymphocyte activation antigen 4F2 large subunit) (4F2 heavy chain antigen) (CD98 antigen) | 4F2_HUMAN   | 57929  | 100% | 2 | 2 | 3  | 0.03% | 5.10%  |
| XTC1-p29 | (P08195) 4F2 cell-surface antigen heavy chain (4F2hc) (Lymphocyte activation antigen 4F2 large subunit) (4F2 heavy chain antigen) (CD98 antigen) | 4F2_HUMAN   | 57929  | 100% | 2 | 2 | 3  | 0.03% | 6.24%  |
| XTC1-p29 | (P08195) 4F2 cell-surface antigen heavy chain (4F2hc) (Lymphocyte activation antigen 4F2 large subunit) (4F2 heavy chain antigen) (CD98 antigen) | 4F2_HUMAN   | 57929  | 100% | 2 | 2 | 2  | 0.02% | 4.91%  |
| XTC1-p29 | (P08238) Heat shock protein HSP 90-beta (HSP 84) (HSP 90)                                                                                        | HS90B_HUMAN | 83118  | 100% | 2 | 2 | 2  | 0.02% | 3.73%  |
| XTC1-p29 | (P08238) Heat shock protein HSP 90-beta (HSP 84) (HSP 90)                                                                                        | HS90B_HUMAN | 83118  | 100% | 2 | 3 | 3  | 0.03% | 5.39%  |

## Protein Identified Sequence Coverage in XTC-1

|          |                                                                                                                                                                                                                                        |            |        |      |   |   |    |       |        |
|----------|----------------------------------------------------------------------------------------------------------------------------------------------------------------------------------------------------------------------------------------|------------|--------|------|---|---|----|-------|--------|
| XTC1-p29 | (P08571) Monocyte differentiation antigen CD14 precursor (Myeloid cell-specific leucine-rich glycoprotein) [Contains: Monocyte differentiation antigen CD14, urinary form; Monocyte differentiation antigen CD14, membrane-bound form] | CD14_HUMAN | 40059  | 100% | 4 | 5 | 9  | 0.08% | 20.50% |
| XTC1-p29 | (P08571) Monocyte differentiation antigen CD14 precursor (Myeloid cell-specific leucine-rich glycoprotein) [Contains: Monocyte differentiation antigen CD14, urinary form; Monocyte differentiation antigen CD14, membrane-bound form] | CD14_HUMAN | 40059  | 100% | 4 | 5 | 10 | 0.09% | 20.30% |
| XTC1-p29 | (P08571) Monocyte differentiation antigen CD14 precursor (Myeloid cell-specific leucine-rich glycoprotein) [Contains: Monocyte differentiation antigen CD14, urinary form; Monocyte differentiation antigen CD14, membrane-bound form] | CD14_HUMAN | 40059  | 100% | 4 | 6 | 10 | 0.09% | 20.30% |
| XTC1-p29 | (P08571) Monocyte differentiation antigen CD14 precursor (Myeloid cell-specific leucine-rich glycoprotein) [Contains: Monocyte differentiation antigen CD14, urinary form; Monocyte differentiation antigen CD14, membrane-bound form] | CD14_HUMAN | 40059  | 100% | 7 | 9 | 13 | 0.12% | 25.30% |
| XTC1-p29 | (P08571) Monocyte differentiation antigen CD14 precursor (Myeloid cell-specific leucine-rich glycoprotein) [Contains: Monocyte differentiation antigen CD14, urinary form; Monocyte differentiation antigen CD14, membrane-bound form] | CD14_HUMAN | 40059  | 100% | 4 | 4 | 6  | 0.05% | 15.70% |
| XTC1-p29 | (P08571) Monocyte differentiation antigen CD14 precursor (Myeloid cell-specific leucine-rich glycoprotein) [Contains: Monocyte differentiation antigen CD14, urinary form; Monocyte differentiation antigen CD14, membrane-bound form] | CD14_HUMAN | 40059  | 100% | 2 | 2 | 3  | 0.03% | 10.40% |
| XTC1-p29 | (P08571) Monocyte differentiation antigen CD14 precursor (Myeloid cell-specific leucine-rich glycoprotein) [Contains: Monocyte differentiation antigen CD14, urinary form; Monocyte differentiation antigen CD14, membrane-bound form] | CD14_HUMAN | 40059  | 100% | 3 | 4 | 5  | 0.04% | 18.90% |
| XTC1-p29 | (P08571) Monocyte differentiation antigen CD14 precursor (Myeloid cell-specific leucine-rich glycoprotein) [Contains: Monocyte differentiation antigen CD14, urinary form; Monocyte differentiation antigen CD14, membrane-bound form] | CD14_HUMAN | 40059  | 100% | 3 | 6 | 17 | 0.14% | 15.50% |
| XTC1-p29 | (P08581) Hepatocyte growth factor receptor precursor (EC 2.7.10.1) (HGF receptor) (Scatter factor receptor) (SF receptor) (HGF/SF receptor) (Met proto-oncogene tyrosine kinase) (c-Met)                                               | MET_HUMAN  | 155511 | 100% | 2 | 2 | 2  | 0.02% | 2.88%  |

## Protein Identified Sequence Coverage in XTC-1

|          |                                                                                                                                                                                            |            |        |      |    |    |    |       |        |
|----------|--------------------------------------------------------------------------------------------------------------------------------------------------------------------------------------------|------------|--------|------|----|----|----|-------|--------|
| XTC1-p29 | (P08581) Hepatocyte growth factor receptor precursor (EC 2.7.10.1) (HGF receptor) (Scatter factor receptor) (SF receptor) (HGF/SF receptor) (Met proto-oncogene tyrosine kinase) (c-Met)   | MET_HUMAN  | 155511 | 100% | 2  | 2  | 2  | 0.02% | 2.30%  |
| XTC1-p29 | (P08581) Hepatocyte growth factor receptor precursor (EC 2.7.10.1) (HGF receptor) (Scatter factor receptor) (SF receptor) (HGF/SF receptor) (Met proto-oncogene tyrosine kinase) (c-Met)   | MET_HUMAN  | 155511 | 100% | 2  | 2  | 2  | 0.02% | 3.09%  |
| XTC1-p29 | (P08582) Melanotransferrin precursor (Melanoma-associated antigen p97) (CD228 antigen)                                                                                                     | TRFM_HUMAN | 80223  | 100% | 2  | 2  | 2  | 0.02% | 5.83%  |
| XTC1-p29 | (P08582) Melanotransferrin precursor (Melanoma-associated antigen p97) (CD228 antigen)                                                                                                     | TRFM_HUMAN | 80223  | 100% | 4  | 4  | 5  | 0.05% | 9.62%  |
| XTC1-p29 | (P08582) Melanotransferrin precursor (Melanoma-associated antigen p97) (CD228 antigen)                                                                                                     | TRFM_HUMAN | 80223  | 100% | 6  | 8  | 11 | 0.10% | 12.50% |
| XTC1-p29 | (P08582) Melanotransferrin precursor (Melanoma-associated antigen p97) (CD228 antigen)                                                                                                     | TRFM_HUMAN | 80223  | 100% | 2  | 2  | 3  | 0.03% | 5.69%  |
| XTC1-p29 | (P08582) Melanotransferrin precursor (Melanoma-associated antigen p97) (CD228 antigen)                                                                                                     | TRFM_HUMAN | 80223  | 100% | 11 | 13 | 15 | 0.13% | 24.90% |
| XTC1-p29 | (P08582) Melanotransferrin precursor (Melanoma-associated antigen p97) (CD228 antigen)                                                                                                     | TRFM_HUMAN | 80223  | 100% | 5  | 5  | 5  | 0.04% | 10.30% |
| XTC1-p29 | (P08582) Melanotransferrin precursor (Melanoma-associated antigen p97) (CD228 antigen)                                                                                                     | TRFM_HUMAN | 80223  | 100% | 5  | 5  | 8  | 0.08% | 16.40% |
| XTC1-p29 | (P08582) Melanotransferrin precursor (Melanoma-associated antigen p97) (CD228 antigen)                                                                                                     | TRFM_HUMAN | 80223  | 100% | 2  | 2  | 2  | 0.02% | 4.61%  |
| XTC1-p29 | (P08582) Melanotransferrin precursor (Melanoma-associated antigen p97) (CD228 antigen)                                                                                                     | TRFM_HUMAN | 80223  | 100% | 2  | 3  | 4  | 0.03% | 7.86%  |
| XTC1-p29 | (P08582) Melanotransferrin precursor (Melanoma-associated antigen p97) (CD228 antigen)                                                                                                     | TRFM_HUMAN | 80223  | 100% | 5  | 5  | 7  | 0.06% | 12.20% |
| XTC1-p29 | (P08582) Melanotransferrin precursor (Melanoma-associated antigen p97) (CD228 antigen)                                                                                                     | TRFM_HUMAN | 80223  | 100% | 3  | 3  | 4  | 0.04% | 8.94%  |
| XTC1-p29 | (P08582) Melanotransferrin precursor (Melanoma-associated antigen p97) (CD228 antigen)                                                                                                     | TRFM_HUMAN | 80223  | 100% | 2  | 2  | 3  | 0.03% | 6.91%  |
| XTC1-p29 | (P08648) Integrin alpha-5 precursor (Fibronectin receptor alpha subunit) (Integrin alpha-F) (VLA-5) (CD49e antigen) [Contains: Integrin alpha-5 heavy chain; Integrin alpha-5 light chain] | ITA5_HUMAN | 114521 | 100% | 2  | 2  | 2  | 0.02% | 3.34%  |
| XTC1-p29 | (P08648) Integrin alpha-5 precursor (Fibronectin receptor alpha subunit) (Integrin alpha-F) (VLA-5) (CD49e antigen) [Contains: Integrin alpha-5 heavy chain; Integrin alpha-5 light chain] | ITA5_HUMAN | 114521 | 100% | 2  | 2  | 2  | 0.02% | 2.86%  |
| XTC1-p29 | (P08648) Integrin alpha-5 precursor (Fibronectin receptor alpha subunit) (Integrin alpha-F) (VLA-5) (CD49e antigen) [Contains: Integrin alpha-5 heavy chain; Integrin alpha-5 light chain] | ITA5_HUMAN | 114521 | 100% | 3  | 4  | 4  | 0.04% | 4.96%  |
| XTC1-p29 | (P08648) Integrin alpha-5 precursor (Fibronectin receptor alpha subunit) (Integrin alpha-F) (VLA-5) (CD49e antigen) [Contains: Integrin alpha-5 heavy chain; Integrin alpha-5 light chain] | ITA5_HUMAN | 114521 | 100% | 3  | 3  | 5  | 0.05% | 4.29%  |
| XTC1-p29 | (P08648) Integrin alpha-5 precursor (Fibronectin receptor alpha subunit) (Integrin alpha-F) (VLA-5) (CD49e antigen) [Contains: Integrin alpha-5 heavy chain; Integrin alpha-5 light chain] | ITA5_HUMAN | 114521 | 100% | 2  | 2  | 2  | 0.02% | 4.29%  |

## Protein Identified Sequence Coverage in XTC-1

|          |                                                                                                                                                                                                                                |             |        |      |   |   |   |       |        |
|----------|--------------------------------------------------------------------------------------------------------------------------------------------------------------------------------------------------------------------------------|-------------|--------|------|---|---|---|-------|--------|
| XTC1-p29 | (P08648) Integrin alpha-5 precursor (Fibronectin receptor alpha subunit) (Integrin alpha-F) (VLA-5) (CD49e antigen) [Contains: Integrin alpha-5 heavy chain; Integrin alpha-5 light chain]                                     | ITA5_HUMAN  | 114521 | 100% | 2 | 2 | 2 | 0.02% | 2.76%  |
| XTC1-p29 | (P08648) Integrin alpha-5 precursor (Fibronectin receptor alpha subunit) (Integrin alpha-F) (VLA-5) (CD49e antigen) [Contains: Integrin alpha-5 heavy chain; Integrin alpha-5 light chain]                                     | ITA5_HUMAN  | 114521 | 100% | 2 | 2 | 2 | 0.02% | 4.77%  |
| XTC1-p29 | (P08758) Annexin A5 (Annexin V) (Lipocortin V) (Endonexin II) (Calphobindin I) (CBP-I) (Placental anticoagulant protein I) (PAP-I) (PP4) (Thromboplastin inhibitor) (Vascular anticoagulant-alpha) (VAC-alpha) (Anchoring CII) | ANXA5_HUMAN | 35789  | 100% | 2 | 2 | 4 | 0.04% | 7.84%  |
| XTC1-p29 | (P08758) Annexin A5 (Annexin V) (Lipocortin V) (Endonexin II) (Calphobindin I) (CBP-I) (Placental anticoagulant protein I) (PAP-I) (PP4) (Thromboplastin inhibitor) (Vascular anticoagulant-alpha) (VAC-alpha) (Anchoring CII) | ANXA5_HUMAN | 35789  | 100% | 4 | 4 | 4 | 0.04% | 21.60% |
| XTC1-p29 | (P08758) Annexin A5 (Annexin V) (Lipocortin V) (Endonexin II) (Calphobindin I) (CBP-I) (Placental anticoagulant protein I) (PAP-I) (PP4) (Thromboplastin inhibitor) (Vascular anticoagulant-alpha) (VAC-alpha) (Anchoring CII) | ANXA5_HUMAN | 35789  | 100% | 3 | 3 | 4 | 0.04% | 12.50% |
| XTC1-p29 | (P08758) Annexin A5 (Annexin V) (Lipocortin V) (Endonexin II) (Calphobindin I) (CBP-I) (Placental anticoagulant protein I) (PAP-I) (PP4) (Thromboplastin inhibitor) (Vascular anticoagulant-alpha) (VAC-alpha) (Anchoring CII) | ANXA5_HUMAN | 35789  | 100% | 2 | 2 | 2 | 0.02% | 7.84%  |
| XTC1-p29 | (P08758) Annexin A5 (Annexin V) (Lipocortin V) (Endonexin II) (Calphobindin I) (CBP-I) (Placental anticoagulant protein I) (PAP-I) (PP4) (Thromboplastin inhibitor) (Vascular anticoagulant-alpha) (VAC-alpha) (Anchoring CII) | ANXA5_HUMAN | 35789  | 100% | 4 | 4 | 6 | 0.05% | 19.10% |
| XTC1-p29 | (P08758) Annexin A5 (Annexin V) (Lipocortin V) (Endonexin II) (Calphobindin I) (CBP-I) (Placental anticoagulant protein I) (PAP-I) (PP4) (Thromboplastin inhibitor) (Vascular anticoagulant-alpha) (VAC-alpha) (Anchoring CII) | ANXA5_HUMAN | 35789  | 100% | 2 | 2 | 5 | 0.04% | 20.40% |
| XTC1-p29 | (P08865) 40S ribosomal protein SA (p40) (34/67 kDa laminin receptor) (Colon carcinoma laminin-binding protein) (NEM/1CHD4) (Multidrug resistance-associated protein MGr1-Ag)                                                   | RSSA_HUMAN  | 32705  | 100% | 4 | 4 | 5 | 0.05% | 22.80% |
| XTC1-p29 | (P08865) 40S ribosomal protein SA (p40) (34/67 kDa laminin receptor) (Colon carcinoma laminin-binding protein) (NEM/1CHD4) (Multidrug resistance-associated protein MGr1-Ag)                                                   | RSSA_HUMAN  | 32705  | 100% | 2 | 2 | 4 | 0.04% | 10.90% |
| XTC1-p29 | (P08865) 40S ribosomal protein SA (p40) (34/67 kDa laminin receptor) (Colon carcinoma laminin-binding protein) (NEM/1CHD4) (Multidrug resistance-associated protein MGr1-Ag)                                                   | RSSA_HUMAN  | 32705  | 100% | 3 | 3 | 4 | 0.04% | 13.60% |
| XTC1-p29 | (P08865) 40S ribosomal protein SA (p40) (34/67 kDa laminin receptor) (Colon carcinoma laminin-binding protein) (NEM/1CHD4) (Multidrug resistance-associated protein MGr1-Ag)                                                   | RSSA_HUMAN  | 32705  | 100% | 2 | 2 | 4 | 0.03% | 17.00% |

## Protein Identified Sequence Coverage in XTC-1

|          |                                                                                                                                                                                                                                |             |       |      |   |   |    |       |        |
|----------|--------------------------------------------------------------------------------------------------------------------------------------------------------------------------------------------------------------------------------|-------------|-------|------|---|---|----|-------|--------|
| XTC1-p29 | (P08962) CD63 antigen (Melanoma-associated antigen ME491) (Lysosome-associated membrane glycoprotein 3) (LAMP-3) (Ocular melanoma-associated antigen) (OMA81H) (Granulophysin) (Tetraspanin-30) (Tspan-30)                     | CD63_HUMAN  | 25487 | 100% | 3 | 3 | 10 | 0.09% | 16.90% |
| XTC1-p29 | (P08962) CD63 antigen (Melanoma-associated antigen ME491) (Lysosome-associated membrane glycoprotein 3) (LAMP-3) (Ocular melanoma-associated antigen) (OMA81H) (Granulophysin) (Tetraspanin-30) (Tspan-30)                     | CD63_HUMAN  | 25487 | 100% | 4 | 6 | 10 | 0.10% | 24.50% |
| XTC1-p29 | (P08962) CD63 antigen (Melanoma-associated antigen ME491) (Lysosome-associated membrane glycoprotein 3) (LAMP-3) (Ocular melanoma-associated antigen) (OMA81H) (Granulophysin) (Tetraspanin-30) (Tspan-30)                     | CD63_HUMAN  | 25487 | 100% | 3 | 4 | 15 | 0.14% | 16.90% |
| XTC1-p29 | (P08962) CD63 antigen (Melanoma-associated antigen ME491) (Lysosome-associated membrane glycoprotein 3) (LAMP-3) (Ocular melanoma-associated antigen) (OMA81H) (Granulophysin) (Tetraspanin-30) (Tspan-30)                     | CD63_HUMAN  | 25487 | 100% | 3 | 3 | 10 | 0.09% | 16.90% |
| XTC1-p29 | (P08962) CD63 antigen (Melanoma-associated antigen ME491) (Lysosome-associated membrane glycoprotein 3) (LAMP-3) (Ocular melanoma-associated antigen) (OMA81H) (Granulophysin) (Tetraspanin-30) (Tspan-30)                     | CD63_HUMAN  | 25487 | 100% | 4 | 4 | 10 | 0.10% | 24.50% |
| XTC1-p29 | (P09012) U1 small nuclear ribonucleoprotein A (U1 snRNP protein A) (U1A protein) (U1-A)                                                                                                                                        | SNRPA_HUMAN | 31131 | 100% | 2 | 2 | 2  | 0.02% | 13.50% |
| XTC1-p29 | (P09211) Glutathione S-transferase P (EC 2.5.1.18) (GST class-pi) (GSTP1-1)                                                                                                                                                    | GSTP1_HUMAN | 23208 | 100% | 2 | 2 | 2  | 0.02% | 17.20% |
| XTC1-p29 | (P09211) Glutathione S-transferase P (EC 2.5.1.18) (GST class-pi) (GSTP1-1)                                                                                                                                                    | GSTP1_HUMAN | 23208 | 100% | 2 | 2 | 2  | 0.02% | 18.70% |
| XTC1-p29 | (P09382) Galectin-1 (Lectin galactoside-binding soluble 1) (Beta-galactoside-binding lectin L-14-I) (Lactose-binding lectin 1) (S-Lac lectin 1) (Galaptin) (14 kDa lectin) (HPL) (HBL) (Putative MAPK-activating protein MP12) | LEG1_HUMAN  | 14567 | 100% | 4 | 4 | 5  | 0.05% | 46.30% |
| XTC1-p29 | (P09382) Galectin-1 (Lectin galactoside-binding soluble 1) (Beta-galactoside-binding lectin L-14-I) (Lactose-binding lectin 1) (S-Lac lectin 1) (Galaptin) (14 kDa lectin) (HPL) (HBL) (Putative MAPK-activating protein MP12) | LEG1_HUMAN  | 14567 | 100% | 5 | 5 | 8  | 0.07% | 57.50% |
| XTC1-p29 | (P09382) Galectin-1 (Lectin galactoside-binding soluble 1) (Beta-galactoside-binding lectin L-14-I) (Lactose-binding lectin 1) (S-Lac lectin 1) (Galaptin) (14 kDa lectin) (HPL) (HBL) (Putative MAPK-activating protein MP12) | LEG1_HUMAN  | 14567 | 100% | 2 | 2 | 4  | 0.04% | 20.90% |
| XTC1-p29 | (P09382) Galectin-1 (Lectin galactoside-binding soluble 1) (Beta-galactoside-binding lectin L-14-I) (Lactose-binding lectin 1) (S-Lac lectin 1) (Galaptin) (14 kDa lectin) (HPL) (HBL) (Putative MAPK-activating protein MP12) | LEG1_HUMAN  | 14567 | 100% | 5 | 5 | 7  | 0.06% | 57.50% |



## Protein Identified Sequence Coverage in XTC-1

|          |                                                                                                                                                                                                                                |             |       |      |   |   |    |       |        |
|----------|--------------------------------------------------------------------------------------------------------------------------------------------------------------------------------------------------------------------------------|-------------|-------|------|---|---|----|-------|--------|
| XTC1-p29 | (P09382) Galectin-1 (Lectin galactoside-binding soluble 1) (Beta-galactoside-binding lectin L-14-l) (Lactose-binding lectin 1) (S-Lac lectin 1) (Galaptin) (14 kDa lectin) (HPL) (HBL) (Putative MAPK-activating protein MP12) | LEG1_HUMAN  | 14567 | 100% | 3 | 3 | 6  | 0.05% | 32.10% |
| XTC1-p29 | (P09382) Galectin-1 (Lectin galactoside-binding soluble 1) (Beta-galactoside-binding lectin L-14-l) (Lactose-binding lectin 1) (S-Lac lectin 1) (Galaptin) (14 kDa lectin) (HPL) (HBL) (Putative MAPK-activating protein MP12) | LEG1_HUMAN  | 14567 | 100% | 3 | 4 | 6  | 0.05% | 37.30% |
| XTC1-p29 | (P09382) Galectin-1 (Lectin galactoside-binding soluble 1) (Beta-galactoside-binding lectin L-14-l) (Lactose-binding lectin 1) (S-Lac lectin 1) (Galaptin) (14 kDa lectin) (HPL) (HBL) (Putative MAPK-activating protein MP12) | LEG1_HUMAN  | 14567 | 100% | 2 | 3 | 5  | 0.04% | 31.30% |
| XTC1-p29 | (P09429) High mobility group protein B1 (High mobility group protein 1) (HMG-1)                                                                                                                                                | HMGB1_HUMAN | 24746 | 100% | 3 | 3 | 5  | 0.05% | 19.20% |
| XTC1-p29 | (P09429) High mobility group protein B1 (High mobility group protein 1) (HMG-1)                                                                                                                                                | HMGB1_HUMAN | 24746 | 100% | 3 | 5 | 8  | 0.07% | 22.40% |
| XTC1-p29 | (P09486) SPARC precursor (Secreted protein acidic and rich in cysteine) (Osteonectin) (ON) (Basement-membrane protein 40) (BM-40)                                                                                              | SPRC_HUMAN  | 34614 | 100% | 5 | 5 | 8  | 0.07% | 25.70% |
| XTC1-p29 | (P09486) SPARC precursor (Secreted protein acidic and rich in cysteine) (Osteonectin) (ON) (Basement-membrane protein 40) (BM-40)                                                                                              | SPRC_HUMAN  | 34614 | 100% | 4 | 5 | 7  | 0.06% | 22.80% |
| XTC1-p29 | (P09486) SPARC precursor (Secreted protein acidic and rich in cysteine) (Osteonectin) (ON) (Basement-membrane protein 40) (BM-40)                                                                                              | SPRC_HUMAN  | 34614 | 100% | 3 | 3 | 4  | 0.04% | 16.80% |
| XTC1-p29 | (P09486) SPARC precursor (Secreted protein acidic and rich in cysteine) (Osteonectin) (ON) (Basement-membrane protein 40) (BM-40)                                                                                              | SPRC_HUMAN  | 34614 | 100% | 7 | 8 | 10 | 0.09% | 34.00% |
| XTC1-p29 | (P09486) SPARC precursor (Secreted protein acidic and rich in cysteine) (Osteonectin) (ON) (Basement-membrane protein 40) (BM-40)                                                                                              | SPRC_HUMAN  | 34614 | 100% | 4 | 4 | 5  | 0.04% | 14.20% |
| XTC1-p29 | (P09486) SPARC precursor (Secreted protein acidic and rich in cysteine) (Osteonectin) (ON) (Basement-membrane protein 40) (BM-40)                                                                                              | SPRC_HUMAN  | 34614 | 100% | 3 | 3 | 4  | 0.04% | 25.70% |
| XTC1-p29 | (P09486) SPARC precursor (Secreted protein acidic and rich in cysteine) (Osteonectin) (ON) (Basement-membrane protein 40) (BM-40)                                                                                              | SPRC_HUMAN  | 34614 | 100% | 2 | 2 | 2  | 0.02% | 14.90% |
| XTC1-p29 | (P09603) Macrophage colony-stimulating factor 1 precursor (CSF-1) (MCSF) (M-CSF) (Lanimosim)                                                                                                                                   | CSF1_HUMAN  | 60101 | 100% | 2 | 2 | 2  | 0.02% | 5.78%  |
| XTC1-p29 | (P09661) U2 small nuclear ribonucleoprotein A' (U2 snRNP-A')                                                                                                                                                                   | RU2A_HUMAN  | 28399 | 100% | 3 | 3 | 4  | 0.04% | 18.80% |
| XTC1-p29 | (P09661) U2 small nuclear ribonucleoprotein A' (U2 snRNP-A')                                                                                                                                                                   | RU2A_HUMAN  | 28399 | 100% | 4 | 4 | 5  | 0.05% | 24.70% |
| XTC1-p29 | (P09661) U2 small nuclear ribonucleoprotein A' (U2 snRNP-A')                                                                                                                                                                   | RU2A_HUMAN  | 28399 | 100% | 6 | 6 | 6  | 0.05% | 34.90% |
| XTC1-p29 | (P09661) U2 small nuclear ribonucleoprotein A' (U2 snRNP-A')                                                                                                                                                                   | RU2A_HUMAN  | 28399 | 100% | 7 | 7 | 11 | 0.10% | 32.50% |
| XTC1-p29 | (P09661) U2 small nuclear ribonucleoprotein A' (U2 snRNP-A')                                                                                                                                                                   | RU2A_HUMAN  | 28399 | 100% | 2 | 2 | 3  | 0.03% | 11.00% |
| XTC1-p29 | (P09661) U2 small nuclear ribonucleoprotein A' (U2 snRNP-A')                                                                                                                                                                   | RU2A_HUMAN  | 28399 | 100% | 4 | 4 | 6  | 0.05% | 24.30% |

## Protein Identified Sequence Coverage in XTC-1

|          |                                                                                                                                                                                        |            |        |      |   |   |    |       |        |
|----------|----------------------------------------------------------------------------------------------------------------------------------------------------------------------------------------|------------|--------|------|---|---|----|-------|--------|
| XTC1-p29 | (P09661) U2 small nuclear ribonucleoprotein A' (U2 snRNP-A)                                                                                                                            | RU2A_HUMAN | 28399  | 100% | 4 | 4 | 4  | 0.03% | 26.30% |
| XTC1-p29 | (P09661) U2 small nuclear ribonucleoprotein A' (U2 snRNP-A)                                                                                                                            | RU2A_HUMAN | 28399  | 100% | 2 | 2 | 2  | 0.02% | 24.70% |
| XTC1-p29 | (P09661) U2 small nuclear ribonucleoprotein A' (U2 snRNP-A)                                                                                                                            | RU2A_HUMAN | 28399  | 100% | 2 | 2 | 3  | 0.03% | 11.40% |
| XTC1-p29 | (P09668) Cathepsin H precursor (EC 3.4.22.16) [Contains: Cathepsin H mini chain; Cathepsin H heavy chain; Cathepsin H light chain]                                                     | CATH_HUMAN | 37360  | 100% | 5 | 5 | 9  | 0.08% | 33.10% |
| XTC1-p29 | (P09668) Cathepsin H precursor (EC 3.4.22.16) [Contains: Cathepsin H mini chain; Cathepsin H heavy chain; Cathepsin H light chain]                                                     | CATH_HUMAN | 37360  | 100% | 4 | 4 | 5  | 0.04% | 25.10% |
| XTC1-p29 | (P09668) Cathepsin H precursor (EC 3.4.22.16) [Contains: Cathepsin H mini chain; Cathepsin H heavy chain; Cathepsin H light chain]                                                     | CATH_HUMAN | 37360  | 100% | 3 | 3 | 7  | 0.06% | 8.96%  |
| XTC1-p29 | (P09668) Cathepsin H precursor (EC 3.4.22.16) [Contains: Cathepsin H mini chain; Cathepsin H heavy chain; Cathepsin H light chain]                                                     | CATH_HUMAN | 37360  | 100% | 3 | 3 | 9  | 0.08% | 24.20% |
| XTC1-p29 | (P0C0L5) Complement C4-B precursor (Basic complement C4) [Contains: Complement C4 beta chain; Complement C4-B alpha chain; C4a anaphylatoxin; C4b-B; C4d-B; Complement C4 gamma chain] | CO4B_HUMAN | 192777 | 100% | 2 | 2 | 2  | 0.02% | 1.83%  |
| XTC1-p29 | (P0C0L5) Complement C4-B precursor (Basic complement C4) [Contains: Complement C4 beta chain; Complement C4-B alpha chain; C4a anaphylatoxin; C4b-B; C4d-B; Complement C4 gamma chain] | CO4B_HUMAN | 192777 | 100% | 2 | 2 | 3  | 0.03% | 2.01%  |
| XTC1-p29 | (P0C0L5) Complement C4-B precursor (Basic complement C4) [Contains: Complement C4 beta chain; Complement C4-B alpha chain; C4a anaphylatoxin; C4b-B; C4d-B; Complement C4 gamma chain] | CO4B_HUMAN | 192777 | 100% | 4 | 4 | 7  | 0.06% | 5.85%  |
| XTC1-p29 | (P0C0L5) Complement C4-B precursor (Basic complement C4) [Contains: Complement C4 beta chain; Complement C4-B alpha chain; C4a anaphylatoxin; C4b-B; C4d-B; Complement C4 gamma chain] | CO4B_HUMAN | 192777 | 100% | 3 | 3 | 4  | 0.03% | 4.19%  |
| XTC1-p29 | (P0C0L5) Complement C4-B precursor (Basic complement C4) [Contains: Complement C4 beta chain; Complement C4-B alpha chain; C4a anaphylatoxin; C4b-B; C4d-B; Complement C4 gamma chain] | CO4B_HUMAN | 192777 | 100% | 2 | 2 | 3  | 0.03% | 2.92%  |
| XTC1-p29 | (P0C0S5) Histone H2A.Z (H2A/z)                                                                                                                                                         | H2AZ_HUMAN | 13404  | 100% | 2 | 2 | 6  | 0.06% | 23.60% |
| XTC1-p29 | (P0C0S5) Histone H2A.Z (H2A/z)                                                                                                                                                         | H2AZ_HUMAN | 13404  | 100% | 3 | 3 | 8  | 0.07% | 31.50% |
| XTC1-p29 | (P0C0S5) Histone H2A.Z (H2A/z)                                                                                                                                                         | H2AZ_HUMAN | 13404  | 100% | 2 | 2 | 17 | 0.16% | 35.40% |
| XTC1-p29 | (P0C0S5) Histone H2A.Z (H2A/z)                                                                                                                                                         | H2AZ_HUMAN | 13404  | 100% | 2 | 2 | 7  | 0.06% | 23.60% |
| XTC1-p29 | (P0C0S5) Histone H2A.Z (H2A/z)                                                                                                                                                         | H2AZ_HUMAN | 13404  | 100% | 2 | 2 | 4  | 0.04% | 18.90% |
| XTC1-p29 | (P0C0S5) Histone H2A.Z (H2A/z)                                                                                                                                                         | H2AZ_HUMAN | 13404  | 100% | 2 | 2 | 3  | 0.03% | 29.90% |
| XTC1-p29 | (P0C0S5) Histone H2A.Z (H2A/z)                                                                                                                                                         | H2AZ_HUMAN | 13404  | 100% | 2 | 2 | 4  | 0.03% | 36.20% |
| XTC1-p29 | (P0C0S5) Histone H2A.Z (H2A/z)                                                                                                                                                         | H2AZ_HUMAN | 13404  | 100% | 2 | 2 | 10 | 0.09% | 29.90% |

## Protein Identified Sequence Coverage in XTC-1

|          |                                                                                                                                                                                    |            |        |      |    |    |    |       |        |
|----------|------------------------------------------------------------------------------------------------------------------------------------------------------------------------------------|------------|--------|------|----|----|----|-------|--------|
| XTC1-p29 | (P10253) Lysosomal alpha-glucosidase precursor (EC 3.2.1.20) (Acid maltase) (Aglucosidase alfa) [Contains: 76 kDa lysosomal alpha-glucosidase; 70 kDa lysosomal alpha-glucosidase] | LYAG_HUMAN | 105321 | 100% | 5  | 5  | 9  | 0.09% | 7.67%  |
| XTC1-p29 | (P10253) Lysosomal alpha-glucosidase precursor (EC 3.2.1.20) (Acid maltase) (Aglucosidase alfa) [Contains: 76 kDa lysosomal alpha-glucosidase; 70 kDa lysosomal alpha-glucosidase] | LYAG_HUMAN | 105321 | 100% | 4  | 4  | 4  | 0.04% | 7.67%  |
| XTC1-p29 | (P10253) Lysosomal alpha-glucosidase precursor (EC 3.2.1.20) (Acid maltase) (Aglucosidase alfa) [Contains: 76 kDa lysosomal alpha-glucosidase; 70 kDa lysosomal alpha-glucosidase] | LYAG_HUMAN | 105321 | 100% | 5  | 6  | 8  | 0.07% | 7.67%  |
| XTC1-p29 | (P10253) Lysosomal alpha-glucosidase precursor (EC 3.2.1.20) (Acid maltase) (Aglucosidase alfa) [Contains: 76 kDa lysosomal alpha-glucosidase; 70 kDa lysosomal alpha-glucosidase] | LYAG_HUMAN | 105321 | 100% | 4  | 4  | 7  | 0.06% | 4.52%  |
| XTC1-p29 | (P10253) Lysosomal alpha-glucosidase precursor (EC 3.2.1.20) (Acid maltase) (Aglucosidase alfa) [Contains: 76 kDa lysosomal alpha-glucosidase; 70 kDa lysosomal alpha-glucosidase] | LYAG_HUMAN | 105321 | 100% | 11 | 11 | 17 | 0.16% | 20.80% |
| XTC1-p29 | (P10253) Lysosomal alpha-glucosidase precursor (EC 3.2.1.20) (Acid maltase) (Aglucosidase alfa) [Contains: 76 kDa lysosomal alpha-glucosidase; 70 kDa lysosomal alpha-glucosidase] | LYAG_HUMAN | 105321 | 100% | 10 | 11 | 24 | 0.22% | 17.90% |
| XTC1-p29 | (P10253) Lysosomal alpha-glucosidase precursor (EC 3.2.1.20) (Acid maltase) (Aglucosidase alfa) [Contains: 76 kDa lysosomal alpha-glucosidase; 70 kDa lysosomal alpha-glucosidase] | LYAG_HUMAN | 105321 | 100% | 8  | 9  | 18 | 0.16% | 13.90% |
| XTC1-p29 | (P10253) Lysosomal alpha-glucosidase precursor (EC 3.2.1.20) (Acid maltase) (Aglucosidase alfa) [Contains: 76 kDa lysosomal alpha-glucosidase; 70 kDa lysosomal alpha-glucosidase] | LYAG_HUMAN | 105321 | 100% | 16 | 17 | 29 | 0.26% | 24.60% |
| XTC1-p29 | (P10253) Lysosomal alpha-glucosidase precursor (EC 3.2.1.20) (Acid maltase) (Aglucosidase alfa) [Contains: 76 kDa lysosomal alpha-glucosidase; 70 kDa lysosomal alpha-glucosidase] | LYAG_HUMAN | 105321 | 100% | 12 | 12 | 27 | 0.24% | 17.60% |
| XTC1-p29 | (P10253) Lysosomal alpha-glucosidase precursor (EC 3.2.1.20) (Acid maltase) (Aglucosidase alfa) [Contains: 76 kDa lysosomal alpha-glucosidase; 70 kDa lysosomal alpha-glucosidase] | LYAG_HUMAN | 105321 | 100% | 4  | 4  | 10 | 0.09% | 10.10% |
| XTC1-p29 | (P10253) Lysosomal alpha-glucosidase precursor (EC 3.2.1.20) (Acid maltase) (Aglucosidase alfa) [Contains: 76 kDa lysosomal alpha-glucosidase; 70 kDa lysosomal alpha-glucosidase] | LYAG_HUMAN | 105321 | 100% | 5  | 5  | 8  | 0.07% | 7.04%  |

## Protein Identified Sequence Coverage in XTC-1

|          |                                                                                                                                                                                                                                               |            |        |      |    |    |    |       |        |
|----------|-----------------------------------------------------------------------------------------------------------------------------------------------------------------------------------------------------------------------------------------------|------------|--------|------|----|----|----|-------|--------|
| XTC1-p29 | (P10253) Lysosomal alpha-glucosidase precursor (EC 3.2.1.20) (Acid maltase) (Aglucosidase alfa) [Contains: 76 kDa lysosomal alpha-glucosidase; 70 kDa lysosomal alpha-glucosidase]                                                            | LYAG_HUMAN | 105321 | 100% | 3  | 3  | 4  | 0.03% | 7.56%  |
| XTC1-p29 | (P10253) Lysosomal alpha-glucosidase precursor (EC 3.2.1.20) (Acid maltase) (Aglucosidase alfa) [Contains: 76 kDa lysosomal alpha-glucosidase; 70 kDa lysosomal alpha-glucosidase]                                                            | LYAG_HUMAN | 105321 | 100% | 5  | 5  | 15 | 0.13% | 10.20% |
| XTC1-p29 | (P10253) Lysosomal alpha-glucosidase precursor (EC 3.2.1.20) (Acid maltase) (Aglucosidase alfa) [Contains: 76 kDa lysosomal alpha-glucosidase; 70 kDa lysosomal alpha-glucosidase]                                                            | LYAG_HUMAN | 105321 | 100% | 3  | 3  | 10 | 0.09% | 5.99%  |
| XTC1-p29 | (P10253) Lysosomal alpha-glucosidase precursor (EC 3.2.1.20) (Acid maltase) (Aglucosidase alfa) [Contains: 76 kDa lysosomal alpha-glucosidase; 70 kDa lysosomal alpha-glucosidase]                                                            | LYAG_HUMAN | 105321 | 100% | 5  | 6  | 14 | 0.12% | 12.50% |
| XTC1-p29 | (P10253) Lysosomal alpha-glucosidase precursor (EC 3.2.1.20) (Acid maltase) (Aglucosidase alfa) [Contains: 76 kDa lysosomal alpha-glucosidase; 70 kDa lysosomal alpha-glucosidase]                                                            | LYAG_HUMAN | 105321 | 100% | 3  | 4  | 15 | 0.13% | 7.25%  |
| XTC1-p29 | (P10619) Lysosomal protective protein precursor (EC 3.4.16.5) (Cathepsin A) (Carboxypeptidase C) (Protective protein for beta-galactosidase) [Contains: Lysosomal protective protein 32 kDa chain; Lysosomal protective protein 20 kDa chain] | PPGB_HUMAN | 54450  | 100% | 3  | 4  | 8  | 0.08% | 9.38%  |
| XTC1-p29 | (P10619) Lysosomal protective protein precursor (EC 3.4.16.5) (Cathepsin A) (Carboxypeptidase C) (Protective protein for beta-galactosidase) [Contains: Lysosomal protective protein 32 kDa chain; Lysosomal protective protein 20 kDa chain] | PPGB_HUMAN | 54450  | 100% | 2  | 2  | 4  | 0.04% | 4.79%  |
| XTC1-p29 | (P10619) Lysosomal protective protein precursor (EC 3.4.16.5) (Cathepsin A) (Carboxypeptidase C) (Protective protein for beta-galactosidase) [Contains: Lysosomal protective protein 32 kDa chain; Lysosomal protective protein 20 kDa chain] | PPGB_HUMAN | 54450  | 100% | 3  | 4  | 10 | 0.09% | 7.71%  |
| XTC1-p29 | (P10619) Lysosomal protective protein precursor (EC 3.4.16.5) (Cathepsin A) (Carboxypeptidase C) (Protective protein for beta-galactosidase) [Contains: Lysosomal protective protein 32 kDa chain; Lysosomal protective protein 20 kDa chain] | PPGB_HUMAN | 54450  | 100% | 2  | 2  | 4  | 0.04% | 4.79%  |
| XTC1-p29 | (P10619) Lysosomal protective protein precursor (EC 3.4.16.5) (Cathepsin A) (Carboxypeptidase C) (Protective protein for beta-galactosidase) [Contains: Lysosomal protective protein 32 kDa chain; Lysosomal protective protein 20 kDa chain] | PPGB_HUMAN | 54450  | 100% | 10 | 12 | 20 | 0.18% | 29.40% |

## Protein Identified Sequence Coverage in XTC-1

|          |                                                                                                                                                                                                                                               |            |       |      |    |    |    |       |        |
|----------|-----------------------------------------------------------------------------------------------------------------------------------------------------------------------------------------------------------------------------------------------|------------|-------|------|----|----|----|-------|--------|
| XTC1-p29 | (P10619) Lysosomal protective protein precursor (EC 3.4.16.5) (Cathepsin A) (Carboxypeptidase C) (Protective protein for beta-galactosidase) [Contains: Lysosomal protective protein 32 kDa chain; Lysosomal protective protein 20 kDa chain] | PPGB_HUMAN | 54450 | 100% | 9  | 10 | 19 | 0.18% | 22.70% |
| XTC1-p29 | (P10619) Lysosomal protective protein precursor (EC 3.4.16.5) (Cathepsin A) (Carboxypeptidase C) (Protective protein for beta-galactosidase) [Contains: Lysosomal protective protein 32 kDa chain; Lysosomal protective protein 20 kDa chain] | PPGB_HUMAN | 54450 | 100% | 6  | 9  | 23 | 0.21% | 14.20% |
| XTC1-p29 | (P10619) Lysosomal protective protein precursor (EC 3.4.16.5) (Cathepsin A) (Carboxypeptidase C) (Protective protein for beta-galactosidase) [Contains: Lysosomal protective protein 32 kDa chain; Lysosomal protective protein 20 kDa chain] | PPGB_HUMAN | 54450 | 100% | 11 | 13 | 23 | 0.21% | 30.80% |
| XTC1-p29 | (P10619) Lysosomal protective protein precursor (EC 3.4.16.5) (Cathepsin A) (Carboxypeptidase C) (Protective protein for beta-galactosidase) [Contains: Lysosomal protective protein 32 kDa chain; Lysosomal protective protein 20 kDa chain] | PPGB_HUMAN | 54450 | 100% | 8  | 8  | 15 | 0.13% | 19.80% |
| XTC1-p29 | (P10619) Lysosomal protective protein precursor (EC 3.4.16.5) (Cathepsin A) (Carboxypeptidase C) (Protective protein for beta-galactosidase) [Contains: Lysosomal protective protein 32 kDa chain; Lysosomal protective protein 20 kDa chain] | PPGB_HUMAN | 54450 | 100% | 4  | 4  | 10 | 0.09% | 13.30% |
| XTC1-p29 | (P10619) Lysosomal protective protein precursor (EC 3.4.16.5) (Cathepsin A) (Carboxypeptidase C) (Protective protein for beta-galactosidase) [Contains: Lysosomal protective protein 32 kDa chain; Lysosomal protective protein 20 kDa chain] | PPGB_HUMAN | 54450 | 100% | 6  | 7  | 21 | 0.18% | 17.50% |
| XTC1-p29 | (P10619) Lysosomal protective protein precursor (EC 3.4.16.5) (Cathepsin A) (Carboxypeptidase C) (Protective protein for beta-galactosidase) [Contains: Lysosomal protective protein 32 kDa chain; Lysosomal protective protein 20 kDa chain] | PPGB_HUMAN | 54450 | 100% | 4  | 6  | 12 | 0.10% | 11.90% |
| XTC1-p29 | (P10619) Lysosomal protective protein precursor (EC 3.4.16.5) (Cathepsin A) (Carboxypeptidase C) (Protective protein for beta-galactosidase) [Contains: Lysosomal protective protein 32 kDa chain; Lysosomal protective protein 20 kDa chain] | PPGB_HUMAN | 54450 | 100% | 4  | 5  | 12 | 0.11% | 18.50% |
| XTC1-p29 | (P10619) Lysosomal protective protein precursor (EC 3.4.16.5) (Cathepsin A) (Carboxypeptidase C) (Protective protein for beta-galactosidase) [Contains: Lysosomal protective protein 32 kDa chain; Lysosomal protective protein 20 kDa chain] | PPGB_HUMAN | 54450 | 100% | 4  | 5  | 7  | 0.06% | 17.70% |

## Protein Identified Sequence Coverage in XTC-1

|          |                                                                                                                                                                                                                                                        |             |       |      |    |    |     |       |        |
|----------|--------------------------------------------------------------------------------------------------------------------------------------------------------------------------------------------------------------------------------------------------------|-------------|-------|------|----|----|-----|-------|--------|
| XTC1-p29 | (P10619) Lysosomal protective protein precursor (EC 3.4.16.5) (Cathepsin A) (Carboxypeptidase C) (Protective protein for beta-galactosidase) [Contains: Lysosomal protective protein 32 kDa chain; Lysosomal protective protein 20 kDa chain]          | PPGB_HUMAN  | 54450 | 100% | 2  | 3  | 5   | 0.04% | 7.50%  |
| XTC1-p29 | (P10809) 60 kDa heat shock protein, mitochondrial precursor (Hsp60) (60 kDa chaperonin) (CPN60) (Heat shock protein 60) (HSP-60) (Mitochondrial matrix protein P1) (P60 lymphocyte protein) (HuCHA60)                                                  | CH60_HUMAN  | 61038 | 100% | 2  | 3  | 4   | 0.03% | 8.03%  |
| XTC1-p29 | (P10809) 60 kDa heat shock protein, mitochondrial precursor (Hsp60) (60 kDa chaperonin) (CPN60) (Heat shock protein 60) (HSP-60) (Mitochondrial matrix protein P1) (P60 lymphocyte protein) (HuCHA60)                                                  | CH60_HUMAN  | 61038 | 100% | 3  | 3  | 5   | 0.04% | 10.60% |
| XTC1-p29 | (P10909) Clusterin precursor (Complement-associated protein SP-40,40) (Complement cytotoxicity inhibitor) (CLI) (NA1/NA2) (Apolipoprotein J) (Apo-J) (Testosterone-repressed prostate message 2) (TRPM-2) [Contains: Clusterin beta chain (ApoJalpha)] | CLUS_HUMAN  | 52477 | 100% | 2  | 2  | 2   | 0.02% | 7.57%  |
| XTC1-p29 | (P10909) Clusterin precursor (Complement-associated protein SP-40,40) (Complement cytotoxicity inhibitor) (CLI) (NA1/NA2) (Apolipoprotein J) (Apo-J) (Testosterone-repressed prostate message 2) (TRPM-2) [Contains: Clusterin beta chain (ApoJalpha)] | CLUS_HUMAN  | 52477 | 100% | 2  | 2  | 2   | 0.02% | 7.57%  |
| XTC1-p29 | (P11021) 78 kDa glucose-regulated protein precursor (GRP 78) (Immunoglobulin heavy chain-binding protein) (BiP) (Endoplasmic reticulum luminal Ca(2+)-binding protein grp78)                                                                           | GRP78_HUMAN | 72317 | 100% | 2  | 2  | 3   | 0.03% | 4.89%  |
| XTC1-p29 | (P11021) 78 kDa glucose-regulated protein precursor (GRP 78) (Immunoglobulin heavy chain-binding protein) (BiP) (Endoplasmic reticulum luminal Ca(2+)-binding protein grp78)                                                                           | GRP78_HUMAN | 72317 | 100% | 22 | 27 | 62  | 0.57% | 44.80% |
| XTC1-p29 | (P11021) 78 kDa glucose-regulated protein precursor (GRP 78) (Immunoglobulin heavy chain-binding protein) (BiP) (Endoplasmic reticulum luminal Ca(2+)-binding protein grp78)                                                                           | GRP78_HUMAN | 72317 | 100% | 26 | 32 | 62  | 0.57% | 48.60% |
| XTC1-p29 | (P11021) 78 kDa glucose-regulated protein precursor (GRP 78) (Immunoglobulin heavy chain-binding protein) (BiP) (Endoplasmic reticulum luminal Ca(2+)-binding protein grp78)                                                                           | GRP78_HUMAN | 72317 | 100% | 23 | 30 | 102 | 0.93% | 41.40% |
| XTC1-p29 | (P11021) 78 kDa glucose-regulated protein precursor (GRP 78) (Immunoglobulin heavy chain-binding protein) (BiP) (Endoplasmic reticulum luminal Ca(2+)-binding protein grp78)                                                                           | GRP78_HUMAN | 72317 | 100% | 30 | 39 | 80  | 0.72% | 49.10% |
| XTC1-p29 | (P11021) 78 kDa glucose-regulated protein precursor (GRP 78) (Immunoglobulin heavy chain-binding protein) (BiP) (Endoplasmic reticulum luminal Ca(2+)-binding protein grp78)                                                                           | GRP78_HUMAN | 72317 | 100% | 25 | 33 | 65  | 0.57% | 41.90% |

## Protein Identified Sequence Coverage in XTC-1

|          |                                                                                                                                                                              |             |        |      |    |    |    |       |        |
|----------|------------------------------------------------------------------------------------------------------------------------------------------------------------------------------|-------------|--------|------|----|----|----|-------|--------|
| XTC1-p29 | (P11021) 78 kDa glucose-regulated protein precursor (GRP 78) (Immunoglobulin heavy chain-binding protein) (BiP) (Endoplasmic reticulum lumenal Ca(2+)-binding protein grp78) | GRP78_HUMAN | 72317  | 100% | 3  | 3  | 35 | 0.33% | 8.26%  |
| XTC1-p29 | (P11021) 78 kDa glucose-regulated protein precursor (GRP 78) (Immunoglobulin heavy chain-binding protein) (BiP) (Endoplasmic reticulum lumenal Ca(2+)-binding protein grp78) | GRP78_HUMAN | 72317  | 100% | 15 | 19 | 63 | 0.54% | 31.20% |
| XTC1-p29 | (P11021) 78 kDa glucose-regulated protein precursor (GRP 78) (Immunoglobulin heavy chain-binding protein) (BiP) (Endoplasmic reticulum lumenal Ca(2+)-binding protein grp78) | GRP78_HUMAN | 72317  | 100% | 2  | 2  | 34 | 0.29% | 5.05%  |
| XTC1-p29 | (P11021) 78 kDa glucose-regulated protein precursor (GRP 78) (Immunoglobulin heavy chain-binding protein) (BiP) (Endoplasmic reticulum lumenal Ca(2+)-binding protein grp78) | GRP78_HUMAN | 72317  | 100% | 4  | 6  | 14 | 0.12% | 10.20% |
| XTC1-p29 | (P11021) 78 kDa glucose-regulated protein precursor (GRP 78) (Immunoglobulin heavy chain-binding protein) (BiP) (Endoplasmic reticulum lumenal Ca(2+)-binding protein grp78) | GRP78_HUMAN | 72317  | 100% | 5  | 8  | 23 | 0.20% | 11.50% |
| XTC1-p29 | (P11021) 78 kDa glucose-regulated protein precursor (GRP 78) (Immunoglobulin heavy chain-binding protein) (BiP) (Endoplasmic reticulum lumenal Ca(2+)-binding protein grp78) | GRP78_HUMAN | 72317  | 100% | 3  | 4  | 18 | 0.16% | 8.26%  |
| XTC1-p29 | (P11047) Laminin gamma-1 chain precursor (Laminin B2 chain)                                                                                                                  | LAMC1_HUMAN | 177587 | 100% | 3  | 3  | 4  | 0.04% | 2.55%  |
| XTC1-p29 | (P11047) Laminin gamma-1 chain precursor (Laminin B2 chain)                                                                                                                  | LAMC1_HUMAN | 177587 | 100% | 4  | 4  | 4  | 0.04% | 3.54%  |
| XTC1-p29 | (P11047) Laminin gamma-1 chain precursor (Laminin B2 chain)                                                                                                                  | LAMC1_HUMAN | 177587 | 100% | 4  | 4  | 5  | 0.05% | 3.11%  |
| XTC1-p29 | (P11047) Laminin gamma-1 chain precursor (Laminin B2 chain)                                                                                                                  | LAMC1_HUMAN | 177587 | 100% | 4  | 4  | 6  | 0.05% | 3.60%  |
| XTC1-p29 | (P11047) Laminin gamma-1 chain precursor (Laminin B2 chain)                                                                                                                  | LAMC1_HUMAN | 177587 | 100% | 2  | 2  | 2  | 0.02% | 1.68%  |
| XTC1-p29 | (P11047) Laminin gamma-1 chain precursor (Laminin B2 chain)                                                                                                                  | LAMC1_HUMAN | 177587 | 100% | 3  | 3  | 3  | 0.03% | 2.55%  |
| XTC1-p29 | (P11047) Laminin gamma-1 chain precursor (Laminin B2 chain)                                                                                                                  | LAMC1_HUMAN | 177587 | 100% | 6  | 6  | 9  | 0.08% | 5.59%  |
| XTC1-p29 | (P11047) Laminin gamma-1 chain precursor (Laminin B2 chain)                                                                                                                  | LAMC1_HUMAN | 177587 | 100% | 5  | 5  | 7  | 0.07% | 7.71%  |
| XTC1-p29 | (P11047) Laminin gamma-1 chain precursor (Laminin B2 chain)                                                                                                                  | LAMC1_HUMAN | 177587 | 100% | 3  | 3  | 3  | 0.03% | 2.42%  |
| XTC1-p29 | (P11047) Laminin gamma-1 chain precursor (Laminin B2 chain)                                                                                                                  | LAMC1_HUMAN | 177587 | 100% | 2  | 2  | 3  | 0.03% | 1.99%  |
| XTC1-p29 | (P11047) Laminin gamma-1 chain precursor (Laminin B2 chain)                                                                                                                  | LAMC1_HUMAN | 177587 | 100% | 3  | 3  | 3  | 0.03% | 4.91%  |
| XTC1-p29 | (P11117) Lysosomal acid phosphatase precursor (EC 3.1.3.2) (LAP)                                                                                                             | PPAL_HUMAN  | 48299  | 100% | 3  | 3  | 5  | 0.05% | 10.90% |
| XTC1-p29 | (P11117) Lysosomal acid phosphatase precursor (EC 3.1.3.2) (LAP)                                                                                                             | PPAL_HUMAN  | 48299  | 100% | 2  | 2  | 2  | 0.02% | 8.27%  |
| XTC1-p29 | (P11117) Lysosomal acid phosphatase precursor (EC 3.1.3.2) (LAP)                                                                                                             | PPAL_HUMAN  | 48299  | 100% | 3  | 3  | 3  | 0.03% | 10.90% |
| XTC1-p29 | (P11117) Lysosomal acid phosphatase precursor (EC 3.1.3.2) (LAP)                                                                                                             | PPAL_HUMAN  | 48299  | 100% | 3  | 3  | 3  | 0.03% | 10.90% |

## Protein Identified Sequence Coverage in XTC-1

|          |                                                                                                                                                                                                                                                      |             |        |      |   |   |    |       |        |
|----------|------------------------------------------------------------------------------------------------------------------------------------------------------------------------------------------------------------------------------------------------------|-------------|--------|------|---|---|----|-------|--------|
| XTC1-p29 | (P11142) Heat shock cognate 71 kDa protein (Heat shock 70 kDa protein 8)                                                                                                                                                                             | HSP7C_HUMAN | 70882  | 100% | 2 | 2 | 2  | 0.02% | 5.11%  |
| XTC1-p29 | (P11142) Heat shock cognate 71 kDa protein (Heat shock 70 kDa protein 8)                                                                                                                                                                             | HSP7C_HUMAN | 70882  | 100% | 8 | 8 | 8  | 0.07% | 18.90% |
| XTC1-p29 | (P11142) Heat shock cognate 71 kDa protein (Heat shock 70 kDa protein 8)                                                                                                                                                                             | HSP7C_HUMAN | 70882  | 100% | 8 | 8 | 13 | 0.12% | 21.10% |
| XTC1-p29 | (P11142) Heat shock cognate 71 kDa protein (Heat shock 70 kDa protein 8)                                                                                                                                                                             | HSP7C_HUMAN | 70882  | 100% | 4 | 4 | 4  | 0.03% | 13.90% |
| XTC1-p29 | (P11279) Lysosome-associated membrane glycoprotein 1 precursor (LAMP-1) (CD107a antigen)                                                                                                                                                             | LAMP1_HUMAN | 44756  | 100% | 3 | 4 | 6  | 0.06% | 17.10% |
| XTC1-p29 | (P11279) Lysosome-associated membrane glycoprotein 1 precursor (LAMP-1) (CD107a antigen)                                                                                                                                                             | LAMP1_HUMAN | 44756  | 100% | 5 | 7 | 9  | 0.09% | 25.20% |
| XTC1-p29 | (P11279) Lysosome-associated membrane glycoprotein 1 precursor (LAMP-1) (CD107a antigen)                                                                                                                                                             | LAMP1_HUMAN | 44756  | 100% | 5 | 7 | 10 | 0.09% | 25.20% |
| XTC1-p29 | (P11279) Lysosome-associated membrane glycoprotein 1 precursor (LAMP-1) (CD107a antigen)                                                                                                                                                             | LAMP1_HUMAN | 44756  | 100% | 2 | 2 | 5  | 0.05% | 7.21%  |
| XTC1-p29 | (P11279) Lysosome-associated membrane glycoprotein 1 precursor (LAMP-1) (CD107a antigen)                                                                                                                                                             | LAMP1_HUMAN | 44756  | 100% | 2 | 2 | 10 | 0.10% | 12.50% |
| XTC1-p29 | (P11279) Lysosome-associated membrane glycoprotein 1 precursor (LAMP-1) (CD107a antigen)                                                                                                                                                             | LAMP1_HUMAN | 44756  | 100% | 4 | 4 | 5  | 0.04% | 9.86%  |
| XTC1-p29 | (P11171) Cation-independent mannose-6-phosphate receptor precursor (CI Man-6-P receptor) (CI-MPR) (M6PR) (Insulin-like growth factor 2 receptor) (Insulin like growth factor II receptor) (IGF-II receptor) (M6P/IGF2 receptor) (M6P/IGF2R) (300 kD) | MPRI_HUMAN  | 274256 | 100% | 3 | 3 | 4  | 0.04% | 2.65%  |
| XTC1-p29 | (P12109) Collagen alpha-1(VI) chain precursor                                                                                                                                                                                                        | CO6A1_HUMAN | 108531 | 100% | 4 | 5 | 8  | 0.07% | 7.68%  |
| XTC1-p29 | (P12109) Collagen alpha-1(VI) chain precursor                                                                                                                                                                                                        | CO6A1_HUMAN | 108531 | 100% | 7 | 8 | 9  | 0.08% | 12.50% |
| XTC1-p29 | (P12109) Collagen alpha-1(VI) chain precursor                                                                                                                                                                                                        | CO6A1_HUMAN | 108531 | 100% | 4 | 4 | 5  | 0.05% | 6.32%  |
| XTC1-p29 | (P12109) Collagen alpha-1(VI) chain precursor                                                                                                                                                                                                        | CO6A1_HUMAN | 108531 | 100% | 5 | 7 | 8  | 0.07% | 10.10% |
| XTC1-p29 | (P12109) Collagen alpha-1(VI) chain precursor                                                                                                                                                                                                        | CO6A1_HUMAN | 108531 | 100% | 7 | 7 | 11 | 0.10% | 11.30% |
| XTC1-p29 | (P12109) Collagen alpha-1(VI) chain precursor                                                                                                                                                                                                        | CO6A1_HUMAN | 108531 | 100% | 5 | 5 | 7  | 0.07% | 12.50% |
| XTC1-p29 | (P12109) Collagen alpha-1(VI) chain precursor                                                                                                                                                                                                        | CO6A1_HUMAN | 108531 | 100% | 3 | 5 | 7  | 0.06% | 6.23%  |
| XTC1-p29 | (P12109) Collagen alpha-1(VI) chain precursor                                                                                                                                                                                                        | CO6A1_HUMAN | 108531 | 100% | 3 | 3 | 4  | 0.03% | 5.06%  |
| XTC1-p29 | (P12109) Collagen alpha-1(VI) chain precursor                                                                                                                                                                                                        | CO6A1_HUMAN | 108531 | 100% | 2 | 2 | 3  | 0.03% | 5.06%  |
| XTC1-p29 | (P12830) Epithelial-cadherin precursor (E-cadherin) (Uvomorulin) (Cadherin-1) (CAM 120/80) (CD324 antigen) [Contains: E-Cad/CTF1; E-Cad/CTF2; E-Cad/CTF3]                                                                                            | CADH1_HUMAN | 97440  | 100% | 2 | 3 | 5  | 0.04% | 5.67%  |
| XTC1-p29 | (P13284) Gamma-interferon-inducible lysosomal thiol reductase precursor (Gamma-interferon-inducible protein IP-30)                                                                                                                                   | GILT_HUMAN  | 29131  | 100% | 2 | 2 | 2  | 0.02% | 24.50% |
| XTC1-p29 | (P13284) Gamma-interferon-inducible lysosomal thiol reductase precursor (Gamma-interferon-inducible protein IP-30)                                                                                                                                   | GILT_HUMAN  | 29131  | 100% | 3 | 3 | 6  | 0.06% | 28.70% |
| XTC1-p29 | (P13284) Gamma-interferon-inducible lysosomal thiol reductase precursor (Gamma-interferon-inducible protein IP-30)                                                                                                                                   | GILT_HUMAN  | 29131  | 100% | 2 | 3 | 5  | 0.05% | 24.50% |



## Protein Identified Sequence Coverage in XTC-1

|          |                                                                                                                    |             |       |      |   |   |    |       |        |
|----------|--------------------------------------------------------------------------------------------------------------------|-------------|-------|------|---|---|----|-------|--------|
| XTC1-p29 | (P13284) Gamma-interferon-inducible lysosomal thiol reductase precursor (Gamma-interferon-inducible protein IP-30) | GILT_HUMAN  | 29131 | 100% | 3 | 4 | 8  | 0.07% | 28.70% |
| XTC1-p29 | (P13284) Gamma-interferon-inducible lysosomal thiol reductase precursor (Gamma-interferon-inducible protein IP-30) | GILT_HUMAN  | 29131 | 100% | 2 | 3 | 5  | 0.04% | 21.10% |
| XTC1-p29 | (P13284) Gamma-interferon-inducible lysosomal thiol reductase precursor (Gamma-interferon-inducible protein IP-30) | GILT_HUMAN  | 29131 | 100% | 2 | 2 | 5  | 0.04% | 25.70% |
| XTC1-p29 | (P13284) Gamma-interferon-inducible lysosomal thiol reductase precursor (Gamma-interferon-inducible protein IP-30) | GILT_HUMAN  | 29131 | 100% | 2 | 3 | 15 | 0.13% | 21.10% |
| XTC1-p29 | (P13284) Gamma-interferon-inducible lysosomal thiol reductase precursor (Gamma-interferon-inducible protein IP-30) | GILT_HUMAN  | 29131 | 100% | 2 | 2 | 3  | 0.03% | 25.70% |
| XTC1-p29 | (P13284) Gamma-interferon-inducible lysosomal thiol reductase precursor (Gamma-interferon-inducible protein IP-30) | GILT_HUMAN  | 29131 | 100% | 2 | 2 | 2  | 0.02% | 21.10% |
| XTC1-p29 | (P13473) Lysosome-associated membrane glycoprotein 2 precursor (LAMP-2) (CD107b antigen)                           | LAMP2_HUMAN | 44943 | 100% | 2 | 2 | 4  | 0.04% | 8.78%  |
| XTC1-p29 | (P13473) Lysosome-associated membrane glycoprotein 2 precursor (LAMP-2) (CD107b antigen)                           | LAMP2_HUMAN | 44943 | 100% | 3 | 4 | 4  | 0.04% | 11.20% |
| XTC1-p29 | (P13473) Lysosome-associated membrane glycoprotein 2 precursor (LAMP-2) (CD107b antigen)                           | LAMP2_HUMAN | 44943 | 100% | 2 | 2 | 3  | 0.03% | 7.07%  |
| XTC1-p29 | (P13591) Neural cell adhesion molecule 1, 140 kDa isoform precursor (N-CAM 140) (NCAM-140) (CD56 antigen)          | NCA11_HUMAN | 93343 | 100% | 2 | 2 | 2  | 0.02% | 3.42%  |
| XTC1-p29 | (P13591) Neural cell adhesion molecule 1, 140 kDa isoform precursor (N-CAM 140) (NCAM-140) (CD56 antigen)          | NCA11_HUMAN | 93343 | 100% | 4 | 4 | 5  | 0.05% | 8.37%  |
| XTC1-p29 | (P13591) Neural cell adhesion molecule 1, 140 kDa isoform precursor (N-CAM 140) (NCAM-140) (CD56 antigen)          | NCA11_HUMAN | 93343 | 100% | 2 | 2 | 3  | 0.03% | 5.19%  |
| XTC1-p29 | (P13591) Neural cell adhesion molecule 1, 140 kDa isoform precursor (N-CAM 140) (NCAM-140) (CD56 antigen)          | NCA11_HUMAN | 93343 | 100% | 3 | 3 | 3  | 0.03% | 4.13%  |
| XTC1-p29 | (P13591) Neural cell adhesion molecule 1, 140 kDa isoform precursor (N-CAM 140) (NCAM-140) (CD56 antigen)          | NCA11_HUMAN | 93343 | 100% | 3 | 3 | 5  | 0.04% | 4.72%  |
| XTC1-p29 | (P13591) Neural cell adhesion molecule 1, 140 kDa isoform precursor (N-CAM 140) (NCAM-140) (CD56 antigen)          | NCA11_HUMAN | 93343 | 100% | 2 | 2 | 3  | 0.03% | 4.60%  |
| XTC1-p29 | (P13591) Neural cell adhesion molecule 1, 140 kDa isoform precursor (N-CAM 140) (NCAM-140) (CD56 antigen)          | NCA11_HUMAN | 93343 | 100% | 3 | 3 | 3  | 0.03% | 9.79%  |
| XTC1-p29 | (P13591) Neural cell adhesion molecule 1, 140 kDa isoform precursor (N-CAM 140) (NCAM-140) (CD56 antigen)          | NCA11_HUMAN | 93343 | 100% | 2 | 2 | 2  | 0.02% | 4.48%  |
| XTC1-p29 | (P13591) Neural cell adhesion molecule 1, 140 kDa isoform precursor (N-CAM 140) (NCAM-140) (CD56 antigen)          | NCA11_HUMAN | 93343 | 100% | 3 | 3 | 4  | 0.04% | 7.08%  |

## Protein Identified Sequence Coverage in XTC-1

|          |                                                                                                                                                                                                                                                      |             |        |      |    |    |    |       |        |
|----------|------------------------------------------------------------------------------------------------------------------------------------------------------------------------------------------------------------------------------------------------------|-------------|--------|------|----|----|----|-------|--------|
| XTC1-p29 | (P13611) Versican core protein precursor (Large fibroblast proteoglycan) (Chondroitin sulfate proteoglycan core protein 2) (PG-M) (Glial hyaluronate-binding protein) (GHAP)                                                                         | CSPG2_HUMAN | 372795 | 100% | 2  | 2  | 2  | 0.02% | 0.88%  |
| XTC1-p29 | (P13611) Versican core protein precursor (Large fibroblast proteoglycan) (Chondroitin sulfate proteoglycan core protein 2) (PG-M) (Glial hyaluronate-binding protein) (GHAP)                                                                         | CSPG2_HUMAN | 372795 | 100% | 5  | 5  | 5  | 0.04% | 2.09%  |
| XTC1-p29 | (P13611) Versican core protein precursor (Large fibroblast proteoglycan) (Chondroitin sulfate proteoglycan core protein 2) (PG-M) (Glial hyaluronate-binding protein) (GHAP)                                                                         | CSPG2_HUMAN | 372795 | 100% | 4  | 4  | 5  | 0.04% | 1.91%  |
| XTC1-p29 | (P13667) Protein disulfide-isomerase A4 precursor (EC 5.3.4.1) (Protein ERp-72) (ERp72)                                                                                                                                                              | PDIA4_HUMAN | 72916  | 100% | 17 | 18 | 34 | 0.31% | 34.90% |
| XTC1-p29 | (P13667) Protein disulfide-isomerase A4 precursor (EC 5.3.4.1) (Protein ERp-72) (ERp72)                                                                                                                                                              | PDIA4_HUMAN | 72916  | 100% | 17 | 18 | 38 | 0.35% | 30.40% |
| XTC1-p29 | (P13667) Protein disulfide-isomerase A4 precursor (EC 5.3.4.1) (Protein ERp-72) (ERp72)                                                                                                                                                              | PDIA4_HUMAN | 72916  | 100% | 12 | 13 | 32 | 0.29% | 25.40% |
| XTC1-p29 | (P13667) Protein disulfide-isomerase A4 precursor (EC 5.3.4.1) (Protein ERp-72) (ERp72)                                                                                                                                                              | PDIA4_HUMAN | 72916  | 100% | 23 | 28 | 42 | 0.38% | 39.10% |
| XTC1-p29 | (P13667) Protein disulfide-isomerase A4 precursor (EC 5.3.4.1) (Protein ERp-72) (ERp72)                                                                                                                                                              | PDIA4_HUMAN | 72916  | 100% | 19 | 19 | 34 | 0.30% | 31.60% |
| XTC1-p29 | (P13667) Protein disulfide-isomerase A4 precursor (EC 5.3.4.1) (Protein ERp-72) (ERp72)                                                                                                                                                              | PDIA4_HUMAN | 72916  | 100% | 7  | 7  | 12 | 0.11% | 19.20% |
| XTC1-p29 | (P13667) Protein disulfide-isomerase A4 precursor (EC 5.3.4.1) (Protein ERp-72) (ERp72)                                                                                                                                                              | PDIA4_HUMAN | 72916  | 100% | 13 | 13 | 24 | 0.21% | 27.40% |
| XTC1-p29 | (P13667) Protein disulfide-isomerase A4 precursor (EC 5.3.4.1) (Protein ERp-72) (ERp72)                                                                                                                                                              | PDIA4_HUMAN | 72916  | 100% | 2  | 3  | 5  | 0.04% | 5.89%  |
| XTC1-p29 | (P13667) Protein disulfide-isomerase A4 precursor (EC 5.3.4.1) (Protein ERp-72) (ERp72)                                                                                                                                                              | PDIA4_HUMAN | 72916  | 100% | 3  | 3  | 3  | 0.03% | 10.40% |
| XTC1-p29 | (P13667) Protein disulfide-isomerase A4 precursor (EC 5.3.4.1) (Protein ERp-72) (ERp72)                                                                                                                                                              | PDIA4_HUMAN | 72916  | 100% | 4  | 5  | 11 | 0.09% | 12.90% |
| XTC1-p29 | (P13667) Protein disulfide-isomerase A4 precursor (EC 5.3.4.1) (Protein ERp-72) (ERp72)                                                                                                                                                              | PDIA4_HUMAN | 72916  | 100% | 3  | 4  | 5  | 0.04% | 8.99%  |
| XTC1-p29 | (P13987) CD59 glycoprotein precursor (Membrane attack complex inhibition factor) (MACIF) (MAC-inhibitory protein) (MAC-IP) (Protectin) (MEM43 antigen) (Membrane inhibitor of reactive lysis) (MIRL) (20 kDa homologous restriction factor) (HRF-20) | CD59_HUMAN  | 14159  | 100% | 2  | 2  | 35 | 0.34% | 22.70% |
| XTC1-p29 | (P13987) CD59 glycoprotein precursor (Membrane attack complex inhibition factor) (MACIF) (MAC-inhibitory protein) (MAC-IP) (Protectin) (MEM43 antigen) (Membrane inhibitor of reactive lysis) (MIRL) (20 kDa homologous restriction factor) (HRF-20) | CD59_HUMAN  | 14159  | 100% | 3  | 3  | 75 | 0.70% | 28.10% |
| XTC1-p29 | (P13987) CD59 glycoprotein precursor (Membrane attack complex inhibition factor) (MACIF) (MAC-inhibitory protein) (MAC-IP) (Protectin) (MEM43 antigen) (Membrane inhibitor of reactive lysis) (MIRL) (20 kDa homologous restriction factor) (HRF-20) | CD59_HUMAN  | 14159  | 100% | 3  | 3  | 72 | 0.66% | 22.70% |

## Protein Identified Sequence Coverage in XTC-1

|          |                                                                                                                                                                                                                                                      |             |       |      |    |    |    |       |        |
|----------|------------------------------------------------------------------------------------------------------------------------------------------------------------------------------------------------------------------------------------------------------|-------------|-------|------|----|----|----|-------|--------|
| XTC1-p29 | (P13987) CD59 glycoprotein precursor (Membrane attack complex inhibition factor) (MACIF) (MAC-inhibitory protein) (MAC-IP) (Protectin) (MEM43 antigen) (Membrane inhibitor of reactive lysis) (MIRL) (20 kDa homologous restriction factor) (HRF-20) | CD59_HUMAN  | 14159 | 100% | 3  | 5  | 16 | 0.15% | 25.00% |
| XTC1-p29 | (P13987) CD59 glycoprotein precursor (Membrane attack complex inhibition factor) (MACIF) (MAC-inhibitory protein) (MAC-IP) (Protectin) (MEM43 antigen) (Membrane inhibitor of reactive lysis) (MIRL) (20 kDa homologous restriction factor) (HRF-20) | CD59_HUMAN  | 14159 | 100% | 4  | 4  | 15 | 0.14% | 25.00% |
| XTC1-p29 | (P13987) CD59 glycoprotein precursor (Membrane attack complex inhibition factor) (MACIF) (MAC-inhibitory protein) (MAC-IP) (Protectin) (MEM43 antigen) (Membrane inhibitor of reactive lysis) (MIRL) (20 kDa homologous restriction factor) (HRF-20) | CD59_HUMAN  | 14159 | 100% | 3  | 5  | 20 | 0.18% | 25.00% |
| XTC1-p29 | (P13987) CD59 glycoprotein precursor (Membrane attack complex inhibition factor) (MACIF) (MAC-inhibitory protein) (MAC-IP) (Protectin) (MEM43 antigen) (Membrane inhibitor of reactive lysis) (MIRL) (20 kDa homologous restriction factor) (HRF-20) | CD59_HUMAN  | 14159 | 100% | 4  | 6  | 30 | 0.27% | 25.00% |
| XTC1-p29 | (P13987) CD59 glycoprotein precursor (Membrane attack complex inhibition factor) (MACIF) (MAC-inhibitory protein) (MAC-IP) (Protectin) (MEM43 antigen) (Membrane inhibitor of reactive lysis) (MIRL) (20 kDa homologous restriction factor) (HRF-20) | CD59_HUMAN  | 14159 | 100% | 3  | 4  | 24 | 0.21% | 18.80% |
| XTC1-p29 | (P13987) CD59 glycoprotein precursor (Membrane attack complex inhibition factor) (MACIF) (MAC-inhibitory protein) (MAC-IP) (Protectin) (MEM43 antigen) (Membrane inhibitor of reactive lysis) (MIRL) (20 kDa homologous restriction factor) (HRF-20) | CD59_HUMAN  | 14159 | 100% | 2  | 2  | 13 | 0.11% | 14.10% |
| XTC1-p29 | (P14314) Glucosidase 2 beta subunit precursor (Glucosidase II beta subunit) (Protein kinase C substrate, 60.1 kDa protein, heavy chain) (PKCSH) (80K-H protein)                                                                                      | GLU2B_HUMAN | 59279 | 100% | 4  | 4  | 4  | 0.04% | 10.60% |
| XTC1-p29 | (P14314) Glucosidase 2 beta subunit precursor (Glucosidase II beta subunit) (Protein kinase C substrate, 60.1 kDa protein, heavy chain) (PKCSH) (80K-H protein)                                                                                      | GLU2B_HUMAN | 59279 | 100% | 18 | 18 | 32 | 0.29% | 38.10% |
| XTC1-p29 | (P14314) Glucosidase 2 beta subunit precursor (Glucosidase II beta subunit) (Protein kinase C substrate, 60.1 kDa protein, heavy chain) (PKCSH) (80K-H protein)                                                                                      | GLU2B_HUMAN | 59279 | 100% | 19 | 22 | 42 | 0.39% | 54.30% |
| XTC1-p29 | (P14314) Glucosidase 2 beta subunit precursor (Glucosidase II beta subunit) (Protein kinase C substrate, 60.1 kDa protein, heavy chain) (PKCSH) (80K-H protein)                                                                                      | GLU2B_HUMAN | 59279 | 100% | 11 | 12 | 55 | 0.50% | 31.30% |

## Protein Identified Sequence Coverage in XTC-1

|          |                                                                                                                                                                 |             |       |      |    |    |    |       |        |
|----------|-----------------------------------------------------------------------------------------------------------------------------------------------------------------|-------------|-------|------|----|----|----|-------|--------|
| XTC1-p29 | (P14314) Glucosidase 2 beta subunit precursor (Glucosidase II beta subunit) (Protein kinase C substrate, 60.1 kDa protein, heavy chain) (PKCSH) (80K-H protein) | GLU2B_HUMAN | 59279 | 100% | 23 | 27 | 55 | 0.49% | 54.80% |
| XTC1-p29 | (P14314) Glucosidase 2 beta subunit precursor (Glucosidase II beta subunit) (Protein kinase C substrate, 60.1 kDa protein, heavy chain) (PKCSH) (80K-H protein) | GLU2B_HUMAN | 59279 | 100% | 13 | 13 | 44 | 0.39% | 23.30% |
| XTC1-p29 | (P14314) Glucosidase 2 beta subunit precursor (Glucosidase II beta subunit) (Protein kinase C substrate, 60.1 kDa protein, heavy chain) (PKCSH) (80K-H protein) | GLU2B_HUMAN | 59279 | 100% | 6  | 6  | 12 | 0.11% | 25.60% |
| XTC1-p29 | (P14314) Glucosidase 2 beta subunit precursor (Glucosidase II beta subunit) (Protein kinase C substrate, 60.1 kDa protein, heavy chain) (PKCSH) (80K-H protein) | GLU2B_HUMAN | 59279 | 100% | 12 | 15 | 48 | 0.41% | 42.30% |
| XTC1-p29 | (P14314) Glucosidase 2 beta subunit precursor (Glucosidase II beta subunit) (Protein kinase C substrate, 60.1 kDa protein, heavy chain) (PKCSH) (80K-H protein) | GLU2B_HUMAN | 59279 | 100% | 3  | 4  | 15 | 0.13% | 12.10% |
| XTC1-p29 | (P14314) Glucosidase 2 beta subunit precursor (Glucosidase II beta subunit) (Protein kinase C substrate, 60.1 kDa protein, heavy chain) (PKCSH) (80K-H protein) | GLU2B_HUMAN | 59279 | 100% | 5  | 6  | 9  | 0.08% | 16.50% |
| XTC1-p29 | (P14384) Carboxypeptidase M precursor (EC 3.4.17.12)                                                                                                            | CBPM_HUMAN  | 50497 | 100% | 2  | 2  | 2  | 0.02% | 9.03%  |
| XTC1-p29 | (P14618) Pyruvate kinase isozymes M1/M2 (EC 2.7.1.40) (Pyruvate kinase muscle isozyme) (Cytosolic thyroid hormone-binding protein) (CTHBP) (THBP1)              | KPYM_HUMAN  | 57788 | 100% | 2  | 2  | 3  | 0.03% | 6.42%  |
| XTC1-p29 | (P14618) Pyruvate kinase isozymes M1/M2 (EC 2.7.1.40) (Pyruvate kinase muscle isozyme) (Cytosolic thyroid hormone-binding protein) (CTHBP) (THBP1)              | KPYM_HUMAN  | 57788 | 100% | 2  | 2  | 3  | 0.03% | 6.42%  |
| XTC1-p29 | (P14618) Pyruvate kinase isozymes M1/M2 (EC 2.7.1.40) (Pyruvate kinase muscle isozyme) (Cytosolic thyroid hormone-binding protein) (CTHBP) (THBP1)              | KPYM_HUMAN  | 57788 | 100% | 2  | 2  | 3  | 0.03% | 5.09%  |
| XTC1-p29 | (P14618) Pyruvate kinase isozymes M1/M2 (EC 2.7.1.40) (Pyruvate kinase muscle isozyme) (Cytosolic thyroid hormone-binding protein) (CTHBP) (THBP1)              | KPYM_HUMAN  | 57788 | 100% | 2  | 2  | 2  | 0.02% | 7.36%  |
| XTC1-p29 | (P14618) Pyruvate kinase isozymes M1/M2 (EC 2.7.1.40) (Pyruvate kinase muscle isozyme) (Cytosolic thyroid hormone-binding protein) (CTHBP) (THBP1)              | KPYM_HUMAN  | 57788 | 100% | 2  | 3  | 3  | 0.03% | 7.55%  |
| XTC1-p29 | (P14618) Pyruvate kinase isozymes M1/M2 (EC 2.7.1.40) (Pyruvate kinase muscle isozyme) (Cytosolic thyroid hormone-binding protein) (CTHBP) (THBP1)              | KPYM_HUMAN  | 57788 | 100% | 2  | 3  | 3  | 0.03% | 7.36%  |
| XTC1-p29 | (P14625) Endoplasmic precursor (Heat shock protein 90 kDa beta member 1) (94 kDa glucose-regulated protein) (GRP94) (gp96 homolog) (Tumor rejection antigen 1)  | ENPL_HUMAN  | 92454 | 100% | 2  | 2  | 2  | 0.02% | 3.74%  |

## Protein Identified Sequence Coverage in XTC-1

|          |                                                                                                                                                                                                              |            |       |      |   |   |    |       |        |
|----------|--------------------------------------------------------------------------------------------------------------------------------------------------------------------------------------------------------------|------------|-------|------|---|---|----|-------|--------|
| XTC1-p29 | (P14625) Endoplasmin precursor (Heat shock protein 90 kDa beta member 1) (94 kDa glucose-regulated protein) (GRP94) (gp96 homolog) (Tumor rejection antigen 1)                                               | ENPL_HUMAN | 92454 | 100% | 2 | 2 | 3  | 0.03% | 4.11%  |
| XTC1-p29 | (P14625) Endoplasmin precursor (Heat shock protein 90 kDa beta member 1) (94 kDa glucose-regulated protein) (GRP94) (gp96 homolog) (Tumor rejection antigen 1)                                               | ENPL_HUMAN | 92454 | 100% | 3 | 3 | 3  | 0.03% | 8.34%  |
| XTC1-p29 | (P15289) Arylsulfatase A precursor (EC 3.1.6.8) (ASA) (Cerebroside-sulfatase) [Contains: Arylsulfatase A component B; Arylsulfatase A component C]                                                           | ARSA_HUMAN | 53571 | 100% | 3 | 3 | 4  | 0.04% | 10.80% |
| XTC1-p29 | (P15289) Arylsulfatase A precursor (EC 3.1.6.8) (ASA) (Cerebroside-sulfatase) [Contains: Arylsulfatase A component B; Arylsulfatase A component C]                                                           | ARSA_HUMAN | 53571 | 100% | 3 | 3 | 6  | 0.06% | 10.70% |
| XTC1-p29 | (P15289) Arylsulfatase A precursor (EC 3.1.6.8) (ASA) (Cerebroside-sulfatase) [Contains: Arylsulfatase A component B; Arylsulfatase A component C]                                                           | ARSA_HUMAN | 53571 | 100% | 2 | 2 | 2  | 0.02% | 6.11%  |
| XTC1-p29 | (P15289) Arylsulfatase A precursor (EC 3.1.6.8) (ASA) (Cerebroside-sulfatase) [Contains: Arylsulfatase A component B; Arylsulfatase A component C]                                                           | ARSA_HUMAN | 53571 | 100% | 3 | 3 | 4  | 0.04% | 11.20% |
| XTC1-p29 | (P15289) Arylsulfatase A precursor (EC 3.1.6.8) (ASA) (Cerebroside-sulfatase) [Contains: Arylsulfatase A component B; Arylsulfatase A component C]                                                           | ARSA_HUMAN | 53571 | 100% | 2 | 2 | 2  | 0.02% | 6.51%  |
| XTC1-p29 | (P15289) Arylsulfatase A precursor (EC 3.1.6.8) (ASA) (Cerebroside-sulfatase) [Contains: Arylsulfatase A component B; Arylsulfatase A component C]                                                           | ARSA_HUMAN | 53571 | 100% | 3 | 4 | 5  | 0.04% | 11.20% |
| XTC1-p29 | (P15289) Arylsulfatase A precursor (EC 3.1.6.8) (ASA) (Cerebroside-sulfatase) [Contains: Arylsulfatase A component B; Arylsulfatase A component C]                                                           | ARSA_HUMAN | 53571 | 100% | 5 | 5 | 8  | 0.07% | 17.80% |
| XTC1-p29 | (P15529) Membrane cofactor protein precursor (Trophoblast leukocyte common antigen) (TLX) (CD46 antigen)                                                                                                     | MCP_HUMAN  | 43730 | 100% | 2 | 2 | 2  | 0.02% | 6.38%  |
| XTC1-p29 | (P15529) Membrane cofactor protein precursor (Trophoblast leukocyte common antigen) (TLX) (CD46 antigen)                                                                                                     | MCP_HUMAN  | 43730 | 100% | 2 | 2 | 3  | 0.03% | 6.38%  |
| XTC1-p29 | (P15531) Nucleoside diphosphate kinase A (EC 2.7.4.6) (NDK A) (NDP kinase A) (Tumor metastatic process-associated protein) (Metastasis inhibition factor nm23) (nm23-H1) (Granzyme A-activated DNase) (GAAD) | NDKA_HUMAN | 17131 | 100% | 2 | 2 | 2  | 0.02% | 32.90% |
| XTC1-p29 | (P15531) Nucleoside diphosphate kinase A (EC 2.7.4.6) (NDK A) (NDP kinase A) (Tumor metastatic process-associated protein) (Metastasis inhibition factor nm23) (nm23-H1) (Granzyme A-activated DNase) (GAAD) | NDKA_HUMAN | 17131 | 100% | 2 | 2 | 3  | 0.03% | 34.90% |
| XTC1-p29 | (P15586) N-acetylglucosamine-6-sulfatase precursor (EC 3.1.6.14) (G6S) (Glucosamine-6-sulfatase)                                                                                                             | GL6S_HUMAN | 62066 | 100% | 7 | 8 | 19 | 0.18% | 21.60% |

## Protein Identified Sequence Coverage in XTC-1

|          |                                                                                                                                                                                                                                                     |            |        |      |   |    |    |       |        |
|----------|-----------------------------------------------------------------------------------------------------------------------------------------------------------------------------------------------------------------------------------------------------|------------|--------|------|---|----|----|-------|--------|
| XTC1-p29 | (P15586) N-acetylglucosamine-6-sulfatase precursor (EC 3.1.6.14) (G6S) (Glucosamine-6-sulfatase)                                                                                                                                                    | GL6S_HUMAN | 62066  | 100% | 5 | 7  | 15 | 0.15% | 11.80% |
| XTC1-p29 | (P15586) N-acetylglucosamine-6-sulfatase precursor (EC 3.1.6.14) (G6S) (Glucosamine-6-sulfatase)                                                                                                                                                    | GL6S_HUMAN | 62066  | 100% | 9 | 11 | 24 | 0.22% | 23.90% |
| XTC1-p29 | (P15586) N-acetylglucosamine-6-sulfatase precursor (EC 3.1.6.14) (G6S) (Glucosamine-6-sulfatase)                                                                                                                                                    | GL6S_HUMAN | 62066  | 100% | 5 | 6  | 16 | 0.15% | 11.20% |
| XTC1-p29 | (P15586) N-acetylglucosamine-6-sulfatase precursor (EC 3.1.6.14) (G6S) (Glucosamine-6-sulfatase)                                                                                                                                                    | GL6S_HUMAN | 62066  | 100% | 8 | 8  | 12 | 0.12% | 29.20% |
| XTC1-p29 | (P15586) N-acetylglucosamine-6-sulfatase precursor (EC 3.1.6.14) (G6S) (Glucosamine-6-sulfatase)                                                                                                                                                    | GL6S_HUMAN | 62066  | 100% | 6 | 6  | 10 | 0.09% | 15.80% |
| XTC1-p29 | (P15586) N-acetylglucosamine-6-sulfatase precursor (EC 3.1.6.14) (G6S) (Glucosamine-6-sulfatase)                                                                                                                                                    | GL6S_HUMAN | 62066  | 100% | 9 | 9  | 15 | 0.14% | 27.40% |
| XTC1-p29 | (P15586) N-acetylglucosamine-6-sulfatase precursor (EC 3.1.6.14) (G6S) (Glucosamine-6-sulfatase)                                                                                                                                                    | GL6S_HUMAN | 62066  | 100% | 6 | 6  | 16 | 0.15% | 18.70% |
| XTC1-p29 | (P15586) N-acetylglucosamine-6-sulfatase precursor (EC 3.1.6.14) (G6S) (Glucosamine-6-sulfatase)                                                                                                                                                    | GL6S_HUMAN | 62066  | 100% | 8 | 8  | 17 | 0.15% | 23.00% |
| XTC1-p29 | (P15586) N-acetylglucosamine-6-sulfatase precursor (EC 3.1.6.14) (G6S) (Glucosamine-6-sulfatase)                                                                                                                                                    | GL6S_HUMAN | 62066  | 100% | 5 | 5  | 8  | 0.07% | 10.70% |
| XTC1-p29 | (P15586) N-acetylglucosamine-6-sulfatase precursor (EC 3.1.6.14) (G6S) (Glucosamine-6-sulfatase)                                                                                                                                                    | GL6S_HUMAN | 62066  | 100% | 2 | 2  | 4  | 0.04% | 9.96%  |
| XTC1-p29 | (P15586) N-acetylglucosamine-6-sulfatase precursor (EC 3.1.6.14) (G6S) (Glucosamine-6-sulfatase)                                                                                                                                                    | GL6S_HUMAN | 62066  | 100% | 5 | 5  | 8  | 0.07% | 11.20% |
| XTC1-p29 | (P15586) N-acetylglucosamine-6-sulfatase precursor (EC 3.1.6.14) (G6S) (Glucosamine-6-sulfatase)                                                                                                                                                    | GL6S_HUMAN | 62066  | 100% | 3 | 4  | 12 | 0.10% | 14.30% |
| XTC1-p29 | (P15586) N-acetylglucosamine-6-sulfatase precursor (EC 3.1.6.14) (G6S) (Glucosamine-6-sulfatase)                                                                                                                                                    | GL6S_HUMAN | 62066  | 100% | 3 | 3  | 6  | 0.05% | 6.16%  |
| XTC1-p29 | (P15880) 40S ribosomal protein S2 (S4) (LLRep3 protein)                                                                                                                                                                                             | RS2_HUMAN  | 31307  | 100% | 2 | 2  | 3  | 0.03% | 10.90% |
| XTC1-p29 | (P15941) Mucin-1 precursor (MUC-1) (Polymorphic epithelial mucin) (PEM) (PEMT) (Episialin) (Tumor-associated mucin) (Carcinoma-associated mucin) (Tumor-associated epithelial membrane antigen) (EMA) (H23AG) (Peanut-reactive urinary mucin) (PUM) | MUC1_HUMAN | 122051 | 100% | 2 | 2  | 4  | 0.04% | 1.75%  |
| XTC1-p29 | (P15941) Mucin-1 precursor (MUC-1) (Polymorphic epithelial mucin) (PEM) (PEMT) (Episialin) (Tumor-associated mucin) (Carcinoma-associated mucin) (Tumor-associated epithelial membrane antigen) (EMA) (H23AG) (Peanut-reactive urinary mucin) (PUM) | MUC1_HUMAN | 122051 | 100% | 2 | 2  | 2  | 0.02% | 1.75%  |

## Protein Identified Sequence Coverage in XTC-1

|          |                                                                                                                                                                                                                                                     |            |        |      |    |    |    |       |        |
|----------|-----------------------------------------------------------------------------------------------------------------------------------------------------------------------------------------------------------------------------------------------------|------------|--------|------|----|----|----|-------|--------|
| XTC1-p29 | (P15941) Mucin-1 precursor (MUC-1) (Polymorphic epithelial mucin) (PEM) (PEMT) (Episialin) (Tumor-associated mucin) (Carcinoma-associated mucin) (Tumor-associated epithelial membrane antigen) (EMA) (H23AG) (Peanut-reactive urinary mucin) (PUM) | MUC1_HUMAN | 122051 | 100% | 3  | 3  | 3  | 0.03% | 2.63%  |
| XTC1-p29 | (P15941) Mucin-1 precursor (MUC-1) (Polymorphic epithelial mucin) (PEM) (PEMT) (Episialin) (Tumor-associated mucin) (Carcinoma-associated mucin) (Tumor-associated epithelial membrane antigen) (EMA) (H23AG) (Peanut-reactive urinary mucin) (PUM) | MUC1_HUMAN | 122051 | 100% | 3  | 3  | 5  | 0.04% | 3.59%  |
| XTC1-p29 | (P16070) CD44 antigen precursor (Phagocytic glycoprotein I) (PGP-1) (HUTCH-I) (Extracellular matrix receptor-III) (ECMR-III) (GP90 lymphocyte homing/adhesion receptor) (Hermes antigen) (Hyaluronate receptor) (Heparan sulfate proteoglycan) (Epi | CD44_HUMAN | 81535  | 100% | 2  | 3  | 4  | 0.04% | 2.96%  |
| XTC1-p29 | (P16070) CD44 antigen precursor (Phagocytic glycoprotein I) (PGP-1) (HUTCH-I) (Extracellular matrix receptor-III) (ECMR-III) (GP90 lymphocyte homing/adhesion receptor) (Hermes antigen) (Hyaluronate receptor) (Heparan sulfate proteoglycan) (Epi | CD44_HUMAN | 81535  | 100% | 4  | 4  | 7  | 0.06% | 6.87%  |
| XTC1-p29 | (P16070) CD44 antigen precursor (Phagocytic glycoprotein I) (PGP-1) (HUTCH-I) (Extracellular matrix receptor-III) (ECMR-III) (GP90 lymphocyte homing/adhesion receptor) (Hermes antigen) (Hyaluronate receptor) (Heparan sulfate proteoglycan) (Epi | CD44_HUMAN | 81535  | 100% | 2  | 3  | 7  | 0.06% | 2.96%  |
| XTC1-p29 | (P16070) CD44 antigen precursor (Phagocytic glycoprotein I) (PGP-1) (HUTCH-I) (Extracellular matrix receptor-III) (ECMR-III) (GP90 lymphocyte homing/adhesion receptor) (Hermes antigen) (Hyaluronate receptor) (Heparan sulfate proteoglycan) (Epi | CD44_HUMAN | 81535  | 100% | 4  | 5  | 8  | 0.07% | 6.87%  |
| XTC1-p29 | (P16070) CD44 antigen precursor (Phagocytic glycoprotein I) (PGP-1) (HUTCH-I) (Extracellular matrix receptor-III) (ECMR-III) (GP90 lymphocyte homing/adhesion receptor) (Hermes antigen) (Hyaluronate receptor) (Heparan sulfate proteoglycan) (Epi | CD44_HUMAN | 81535  | 100% | 4  | 4  | 6  | 0.05% | 6.87%  |
| XTC1-p29 | (P16278) Beta-galactosidase precursor (EC 3.2.1.23) (Lactase) (Acid beta-galactosidase)                                                                                                                                                             | BGAL_HUMAN | 76076  | 100% | 2  | 2  | 3  | 0.03% | 3.69%  |
| XTC1-p29 | (P16278) Beta-galactosidase precursor (EC 3.2.1.23) (Lactase) (Acid beta-galactosidase)                                                                                                                                                             | BGAL_HUMAN | 76076  | 100% | 10 | 11 | 15 | 0.14% | 21.90% |
| XTC1-p29 | (P16278) Beta-galactosidase precursor (EC 3.2.1.23) (Lactase) (Acid beta-galactosidase)                                                                                                                                                             | BGAL_HUMAN | 76076  | 100% | 9  | 10 | 14 | 0.13% | 16.10% |
| XTC1-p29 | (P16278) Beta-galactosidase precursor (EC 3.2.1.23) (Lactase) (Acid beta-galactosidase)                                                                                                                                                             | BGAL_HUMAN | 76076  | 100% | 5  | 5  | 13 | 0.12% | 12.70% |
| XTC1-p29 | (P16278) Beta-galactosidase precursor (EC 3.2.1.23) (Lactase) (Acid beta-galactosidase)                                                                                                                                                             | BGAL_HUMAN | 76076  | 100% | 10 | 11 | 15 | 0.13% | 19.40% |
| XTC1-p29 | (P16278) Beta-galactosidase precursor (EC 3.2.1.23) (Lactase) (Acid beta-galactosidase)                                                                                                                                                             | BGAL_HUMAN | 76076  | 100% | 11 | 11 | 18 | 0.16% | 22.70% |

## Protein Identified Sequence Coverage in XTC-1

|          |                                                                                                                                        |             |        |      |   |   |    |       |        |
|----------|----------------------------------------------------------------------------------------------------------------------------------------|-------------|--------|------|---|---|----|-------|--------|
| XTC1-p29 | (P16278) Beta-galactosidase precursor (EC 3.2.1.23) (Lactase) (Acid beta-galactosidase)                                                | BGAL_HUMAN  | 76076  | 100% | 6 | 6 | 9  | 0.08% | 12.10% |
| XTC1-p29 | (P16278) Beta-galactosidase precursor (EC 3.2.1.23) (Lactase) (Acid beta-galactosidase)                                                | BGAL_HUMAN  | 76076  | 100% | 3 | 3 | 4  | 0.03% | 5.76%  |
| XTC1-p29 | (P16401) Histone H1.5 (Histone H1a)                                                                                                    | H15_HUMAN   | 22433  | 100% | 2 | 2 | 2  | 0.02% | 10.70% |
| XTC1-p29 | (P16401) Histone H1.5 (Histone H1a)                                                                                                    | H15_HUMAN   | 22433  | 100% | 2 | 2 | 2  | 0.02% | 10.70% |
| XTC1-p29 | (P16401) Histone H1.5 (Histone H1a)                                                                                                    | H15_HUMAN   | 22433  | 100% | 3 | 3 | 6  | 0.05% | 10.70% |
| XTC1-p29 | (P16402) Histone H1.3 (Histone H1c)                                                                                                    | H13_HUMAN   | 22202  | 100% | 5 | 5 | 9  | 0.08% | 15.50% |
| XTC1-p29 | (P16402) Histone H1.3 (Histone H1c)                                                                                                    | H13_HUMAN   | 22202  | 100% | 2 | 2 | 4  | 0.04% | 9.09%  |
| XTC1-p29 | (P16402) Histone H1.3 (Histone H1c)                                                                                                    | H13_HUMAN   | 22202  | 100% | 4 | 4 | 5  | 0.04% | 15.00% |
| XTC1-p29 | (P16402) Histone H1.3 (Histone H1c)                                                                                                    | H13_HUMAN   | 22202  | 100% | 3 | 3 | 5  | 0.04% | 10.90% |
| XTC1-p29 | (P16402) Histone H1.3 (Histone H1c)                                                                                                    | H13_HUMAN   | 22202  | 100% | 3 | 3 | 4  | 0.03% | 14.50% |
| XTC1-p29 | (P17050) Alpha-N-acetylgalactosaminidase precursor (EC 3.2.1.49) (Alpha-galactosidase B)                                               | NAGAB_HUMAN | 46548  | 100% | 2 | 2 | 2  | 0.02% | 8.76%  |
| XTC1-p29 | (P17050) Alpha-N-acetylgalactosaminidase precursor (EC 3.2.1.49) (Alpha-galactosidase B)                                               | NAGAB_HUMAN | 46548  | 100% | 2 | 2 | 2  | 0.02% | 10.20% |
| XTC1-p29 | (P17050) Alpha-N-acetylgalactosaminidase precursor (EC 3.2.1.49) (Alpha-galactosidase B)                                               | NAGAB_HUMAN | 46548  | 100% | 2 | 2 | 4  | 0.04% | 6.81%  |
| XTC1-p29 | (P17050) Alpha-N-acetylgalactosaminidase precursor (EC 3.2.1.49) (Alpha-galactosidase B)                                               | NAGAB_HUMAN | 46548  | 100% | 7 | 7 | 11 | 0.10% | 23.80% |
| XTC1-p29 | (P17050) Alpha-N-acetylgalactosaminidase precursor (EC 3.2.1.49) (Alpha-galactosidase B)                                               | NAGAB_HUMAN | 46548  | 100% | 5 | 5 | 5  | 0.04% | 14.80% |
| XTC1-p29 | (P17050) Alpha-N-acetylgalactosaminidase precursor (EC 3.2.1.49) (Alpha-galactosidase B)                                               | NAGAB_HUMAN | 46548  | 100% | 5 | 5 | 11 | 0.10% | 16.30% |
| XTC1-p29 | (P17050) Alpha-N-acetylgalactosaminidase precursor (EC 3.2.1.49) (Alpha-galactosidase B)                                               | NAGAB_HUMAN | 46548  | 100% | 2 | 2 | 2  | 0.02% | 9.00%  |
| XTC1-p29 | (P17050) Alpha-N-acetylgalactosaminidase precursor (EC 3.2.1.49) (Alpha-galactosidase B)                                               | NAGAB_HUMAN | 46548  | 100% | 3 | 3 | 3  | 0.03% | 9.73%  |
| XTC1-p29 | (P17050) Alpha-N-acetylgalactosaminidase precursor (EC 3.2.1.49) (Alpha-galactosidase B)                                               | NAGAB_HUMAN | 46548  | 100% | 2 | 2 | 2  | 0.02% | 9.00%  |
| XTC1-p29 | (P17174) Aspartate aminotransferase, cytoplasmic (EC 2.6.1.1) (Transaminase A) (Glutamate oxaloacetate transaminase 1)                 | AATC_HUMAN  | 46099  | 100% | 2 | 2 | 4  | 0.04% | 9.71%  |
| XTC1-p29 | (P17174) Aspartate aminotransferase, cytoplasmic (EC 2.6.1.1) (Transaminase A) (Glutamate oxaloacetate transaminase 1)                 | AATC_HUMAN  | 46099  | 100% | 2 | 2 | 2  | 0.02% | 9.71%  |
| XTC1-p29 | (P17174) Aspartate aminotransferase, cytoplasmic (EC 2.6.1.1) (Transaminase A) (Glutamate oxaloacetate transaminase 1)                 | AATC_HUMAN  | 46099  | 100% | 2 | 2 | 2  | 0.02% | 8.01%  |
| XTC1-p29 | (P17174) Aspartate aminotransferase, cytoplasmic (EC 2.6.1.1) (Transaminase A) (Glutamate oxaloacetate transaminase 1)                 | AATC_HUMAN  | 46099  | 100% | 2 | 2 | 4  | 0.04% | 9.71%  |
| XTC1-p29 | (P17174) Aspartate aminotransferase, cytoplasmic (EC 2.6.1.1) (Transaminase A) (Glutamate oxaloacetate transaminase 1)                 | AATC_HUMAN  | 46099  | 100% | 2 | 3 | 3  | 0.03% | 9.47%  |
| XTC1-p29 | (P17174) Aspartate aminotransferase, cytoplasmic (EC 2.6.1.1) (Transaminase A) (Glutamate oxaloacetate transaminase 1)                 | AATC_HUMAN  | 46099  | 100% | 2 | 2 | 2  | 0.02% | 9.47%  |
| XTC1-p29 | (P17174) Aspartate aminotransferase, cytoplasmic (EC 2.6.1.1) (Transaminase A) (Glutamate oxaloacetate transaminase 1)                 | AATC_HUMAN  | 46099  | 100% | 3 | 3 | 6  | 0.05% | 15.50% |
| XTC1-p29 | (P17301) Integrin alpha-2 precursor (Platelet membrane glycoprotein Ia) (GPIa) (Collagen receptor) (VLA-2 alpha chain) (CD49b antigen) | ITA2_HUMAN  | 129280 | 100% | 3 | 3 | 5  | 0.05% | 6.01%  |



## Protein Identified Sequence Coverage in XTC-1

|          |                                                                                                                                                                                             |             |        |      |   |   |   |       |        |
|----------|---------------------------------------------------------------------------------------------------------------------------------------------------------------------------------------------|-------------|--------|------|---|---|---|-------|--------|
| XTC1-p29 | (P17301) Integrin alpha-2 precursor (Platelet membrane glycoprotein Ia) (GPIa) (Collagen receptor) (VLA-2 alpha chain) (CD49b antigen)                                                      | ITA2_HUMAN  | 129280 | 100% | 3 | 3 | 4 | 0.03% | 6.35%  |
| XTC1-p29 | (P17900) Ganglioside GM2 activator precursor (GM2-AP) (Cerebroside sulfate activator protein) (Shingolipid activator protein 3) (SAP-3) [Contains: Ganglioside GM2 activator isoform short] | SAP3_HUMAN  | 20805  | 100% | 3 | 3 | 6 | 0.06% | 33.70% |
| XTC1-p29 | (P17900) Ganglioside GM2 activator precursor (GM2-AP) (Cerebroside sulfate activator protein) (Shingolipid activator protein 3) (SAP-3) [Contains: Ganglioside GM2 activator isoform short] | SAP3_HUMAN  | 20805  | 100% | 4 | 5 | 8 | 0.07% | 38.90% |
| XTC1-p29 | (P17900) Ganglioside GM2 activator precursor (GM2-AP) (Cerebroside sulfate activator protein) (Shingolipid activator protein 3) (SAP-3) [Contains: Ganglioside GM2 activator isoform short] | SAP3_HUMAN  | 20805  | 100% | 2 | 2 | 5 | 0.05% | 28.00% |
| XTC1-p29 | (P17900) Ganglioside GM2 activator precursor (GM2-AP) (Cerebroside sulfate activator protein) (Shingolipid activator protein 3) (SAP-3) [Contains: Ganglioside GM2 activator isoform short] | SAP3_HUMAN  | 20805  | 100% | 4 | 4 | 4 | 0.04% | 38.90% |
| XTC1-p29 | (P17900) Ganglioside GM2 activator precursor (GM2-AP) (Cerebroside sulfate activator protein) (Shingolipid activator protein 3) (SAP-3) [Contains: Ganglioside GM2 activator isoform short] | SAP3_HUMAN  | 20805  | 100% | 2 | 2 | 3 | 0.03% | 16.10% |
| XTC1-p29 | (P18084) Integrin beta-5 precursor                                                                                                                                                          | ITB5_HUMAN  | 88037  | 100% | 3 | 3 | 3 | 0.03% | 9.14%  |
| XTC1-p29 | (P19022) Neural-cadherin precursor (N-cadherin) (Cadherin-2) (CDw325 antigen)                                                                                                               | CADH2_HUMAN | 99836  | 100% | 3 | 3 | 3 | 0.03% | 9.71%  |
| XTC1-p29 | (P19022) Neural-cadherin precursor (N-cadherin) (Cadherin-2) (CDw325 antigen)                                                                                                               | CADH2_HUMAN | 99836  | 100% | 2 | 2 | 2 | 0.02% | 6.84%  |
| XTC1-p29 | (P19022) Neural-cadherin precursor (N-cadherin) (Cadherin-2) (CDw325 antigen)                                                                                                               | CADH2_HUMAN | 99836  | 100% | 4 | 4 | 5 | 0.05% | 10.60% |
| XTC1-p29 | (P19022) Neural-cadherin precursor (N-cadherin) (Cadherin-2) (CDw325 antigen)                                                                                                               | CADH2_HUMAN | 99836  | 100% | 4 | 4 | 6 | 0.06% | 10.00% |
| XTC1-p29 | (P19022) Neural-cadherin precursor (N-cadherin) (Cadherin-2) (CDw325 antigen)                                                                                                               | CADH2_HUMAN | 99836  | 100% | 2 | 2 | 4 | 0.04% | 6.51%  |
| XTC1-p29 | (P19022) Neural-cadherin precursor (N-cadherin) (Cadherin-2) (CDw325 antigen)                                                                                                               | CADH2_HUMAN | 99836  | 100% | 3 | 3 | 3 | 0.03% | 7.17%  |
| XTC1-p29 | (P19022) Neural-cadherin precursor (N-cadherin) (Cadherin-2) (CDw325 antigen)                                                                                                               | CADH2_HUMAN | 99836  | 100% | 3 | 3 | 6 | 0.05% | 6.95%  |
| XTC1-p29 | (P19022) Neural-cadherin precursor (N-cadherin) (Cadherin-2) (CDw325 antigen)                                                                                                               | CADH2_HUMAN | 99836  | 100% | 4 | 4 | 6 | 0.06% | 11.90% |
| XTC1-p29 | (P19022) Neural-cadherin precursor (N-cadherin) (Cadherin-2) (CDw325 antigen)                                                                                                               | CADH2_HUMAN | 99836  | 100% | 2 | 2 | 2 | 0.02% | 3.53%  |
| XTC1-p29 | (P19022) Neural-cadherin precursor (N-cadherin) (Cadherin-2) (CDw325 antigen)                                                                                                               | CADH2_HUMAN | 99836  | 100% | 2 | 2 | 2 | 0.02% | 6.73%  |
| XTC1-p29 | (P19338) Nucleolin (Protein C23)                                                                                                                                                            | NUCL_HUMAN  | 76467  | 100% | 3 | 3 | 3 | 0.03% | 8.89%  |
| XTC1-p29 | (P19338) Nucleolin (Protein C23)                                                                                                                                                            | NUCL_HUMAN  | 76467  | 100% | 3 | 5 | 5 | 0.04% | 8.89%  |

## Protein Identified Sequence Coverage in XTC-1

|          |                                                                                                                                                                                                                 |             |        |      |   |   |   |       |        |
|----------|-----------------------------------------------------------------------------------------------------------------------------------------------------------------------------------------------------------------|-------------|--------|------|---|---|---|-------|--------|
| XTC1-p29 | (P19440) Gamma-glutamyltranspeptidase 1 precursor (EC 2.3.2.2) (Gamma-glutamyltransferase 1) (CD224 antigen) [Contains: Gamma-glutamyltranspeptidase 1 heavy chain; Gamma-glutamyltranspeptidase 1 light chain] | GGT1_HUMAN  | 61393  | 100% | 2 | 2 | 2 | 0.02% | 5.10%  |
| XTC1-p29 | (P20618) Proteasome subunit beta type 1 (EC 3.4.25.1) (Proteasome component C5) (Macropain subunit C5) (Multicatalytic endopeptidase complex subunit C5) (Proteasome gamma chain)                               | PSB1_HUMAN  | 26473  | 100% | 3 | 3 | 4 | 0.04% | 21.60% |
| XTC1-p29 | (P20618) Proteasome subunit beta type 1 (EC 3.4.25.1) (Proteasome component C5) (Macropain subunit C5) (Multicatalytic endopeptidase complex subunit C5) (Proteasome gamma chain)                               | PSB1_HUMAN  | 26473  | 100% | 4 | 6 | 8 | 0.07% | 26.10% |
| XTC1-p29 | (P20618) Proteasome subunit beta type 1 (EC 3.4.25.1) (Proteasome component C5) (Macropain subunit C5) (Multicatalytic endopeptidase complex subunit C5) (Proteasome gamma chain)                               | PSB1_HUMAN  | 26473  | 100% | 2 | 2 | 2 | 0.02% | 10.40% |
| XTC1-p29 | (P20618) Proteasome subunit beta type 1 (EC 3.4.25.1) (Proteasome component C5) (Macropain subunit C5) (Multicatalytic endopeptidase complex subunit C5) (Proteasome gamma chain)                               | PSB1_HUMAN  | 26473  | 100% | 3 | 4 | 5 | 0.04% | 14.50% |
| XTC1-p29 | (P20618) Proteasome subunit beta type 1 (EC 3.4.25.1) (Proteasome component C5) (Macropain subunit C5) (Multicatalytic endopeptidase complex subunit C5) (Proteasome gamma chain)                               | PSB1_HUMAN  | 26473  | 100% | 2 | 3 | 3 | 0.03% | 14.10% |
| XTC1-p29 | (P20618) Proteasome subunit beta type 1 (EC 3.4.25.1) (Proteasome component C5) (Macropain subunit C5) (Multicatalytic endopeptidase complex subunit C5) (Proteasome gamma chain)                               | PSB1_HUMAN  | 26473  | 100% | 2 | 2 | 3 | 0.03% | 14.90% |
| XTC1-p29 | (P20908) Collagen alpha-1(V) chain precursor                                                                                                                                                                    | CO5A1_HUMAN | 183545 | 100% | 4 | 5 | 9 | 0.08% | 4.03%  |
| XTC1-p29 | (P20908) Collagen alpha-1(V) chain precursor                                                                                                                                                                    | CO5A1_HUMAN | 183545 | 100% | 2 | 2 | 4 | 0.04% | 2.18%  |
| XTC1-p29 | (P20908) Collagen alpha-1(V) chain precursor                                                                                                                                                                    | CO5A1_HUMAN | 183545 | 100% | 3 | 3 | 6 | 0.05% | 3.54%  |
| XTC1-p29 | (P20908) Collagen alpha-1(V) chain precursor                                                                                                                                                                    | CO5A1_HUMAN | 183545 | 100% | 4 | 4 | 5 | 0.04% | 4.03%  |
| XTC1-p29 | (P20908) Collagen alpha-1(V) chain precursor                                                                                                                                                                    | CO5A1_HUMAN | 183545 | 100% | 3 | 3 | 4 | 0.04% | 3.16%  |
| XTC1-p29 | (P20908) Collagen alpha-1(V) chain precursor                                                                                                                                                                    | CO5A1_HUMAN | 183545 | 100% | 4 | 4 | 6 | 0.06% | 4.62%  |
| XTC1-p29 | (P20908) Collagen alpha-1(V) chain precursor                                                                                                                                                                    | CO5A1_HUMAN | 183545 | 100% | 3 | 3 | 6 | 0.05% | 3.26%  |
| XTC1-p29 | (P20908) Collagen alpha-1(V) chain precursor                                                                                                                                                                    | CO5A1_HUMAN | 183545 | 100% | 2 | 2 | 2 | 0.02% | 2.56%  |
| XTC1-p29 | (P20908) Collagen alpha-1(V) chain precursor                                                                                                                                                                    | CO5A1_HUMAN | 183545 | 100% | 2 | 3 | 7 | 0.06% | 2.18%  |
| XTC1-p29 | (P20908) Collagen alpha-1(V) chain precursor                                                                                                                                                                    | CO5A1_HUMAN | 183545 | 100% | 3 | 3 | 3 | 0.03% | 4.03%  |
| XTC1-p29 | (P20908) Collagen alpha-1(V) chain precursor                                                                                                                                                                    | CO5A1_HUMAN | 183545 | 100% | 4 | 5 | 7 | 0.06% | 5.01%  |
| XTC1-p29 | (P21333) Filamin-A (Alpha-filamin) (Filamin-1) (Endothelial actin-binding protein) (Actin-binding protein 280) (ABP-280) (Nonmuscle filamin)                                                                    | FLNA_HUMAN  | 280602 | 100% | 2 | 2 | 2 | 0.02% | 2.57%  |
| XTC1-p29 | (P21589) 5'-nucleotidase precursor (EC 3.1.3.5) (Ecto-5'-nucleotidase) (5'-NT) (CD73 antigen)                                                                                                                   | 5NTD_HUMAN  | 63351  | 100% | 2 | 3 | 3 | 0.03% | 6.45%  |
| XTC1-p29 | (P21589) 5'-nucleotidase precursor (EC 3.1.3.5) (Ecto-5'-nucleotidase) (5'-NT) (CD73 antigen)                                                                                                                   | 5NTD_HUMAN  | 63351  | 100% | 2 | 3 | 3 | 0.03% | 6.45%  |

## Protein Identified Sequence Coverage in XTC-1

|          |                                                                                                                                                                                                                              |             |       |      |   |   |    |       |        |
|----------|------------------------------------------------------------------------------------------------------------------------------------------------------------------------------------------------------------------------------|-------------|-------|------|---|---|----|-------|--------|
| XTC1-p29 | (P21589) 5'-nucleotidase precursor (EC 3.1.3.5) (Ecto-5'-nucleotidase) (5'-NT) (CD73 antigen)                                                                                                                                | 5NTD_HUMAN  | 63351 | 100% | 2 | 2 | 3  | 0.03% | 5.23%  |
| XTC1-p29 | (P21589) 5'-nucleotidase precursor (EC 3.1.3.5) (Ecto-5'-nucleotidase) (5'-NT) (CD73 antigen)                                                                                                                                | 5NTD_HUMAN  | 63351 | 100% | 3 | 3 | 5  | 0.05% | 9.23%  |
| XTC1-p29 | (P21589) 5'-nucleotidase precursor (EC 3.1.3.5) (Ecto-5'-nucleotidase) (5'-NT) (CD73 antigen)                                                                                                                                | 5NTD_HUMAN  | 63351 | 100% | 3 | 3 | 5  | 0.04% | 9.06%  |
| XTC1-p29 | (P21589) 5'-nucleotidase precursor (EC 3.1.3.5) (Ecto-5'-nucleotidase) (5'-NT) (CD73 antigen)                                                                                                                                | 5NTD_HUMAN  | 63351 | 100% | 5 | 5 | 11 | 0.09% | 20.40% |
| XTC1-p29 | (P21589) 5'-nucleotidase precursor (EC 3.1.3.5) (Ecto-5'-nucleotidase) (5'-NT) (CD73 antigen)                                                                                                                                | 5NTD_HUMAN  | 63351 | 100% | 2 | 2 | 3  | 0.03% | 7.84%  |
| XTC1-p29 | (P21796) Voltage-dependent anion-selective channel protein 1 (VDAC-1) (hVDAC1) (Outer mitochondrial membrane protein porin 1) (Plasmalemmal porin) (Porin 31HL) (Porin 31HM)                                                 | VDAC1_HUMAN | 30625 | 100% | 2 | 2 | 2  | 0.02% | 7.45%  |
| XTC1-p29 | (P21796) Voltage-dependent anion-selective channel protein 1 (VDAC-1) (hVDAC1) (Outer mitochondrial membrane protein porin 1) (Plasmalemmal porin) (Porin 31HL) (Porin 31HM)                                                 | VDAC1_HUMAN | 30625 | 100% | 2 | 2 | 2  | 0.02% | 7.45%  |
| XTC1-p29 | (P21796) Voltage-dependent anion-selective channel protein 1 (VDAC-1) (hVDAC1) (Outer mitochondrial membrane protein porin 1) (Plasmalemmal porin) (Porin 31HL) (Porin 31HM)                                                 | VDAC1_HUMAN | 30625 | 100% | 2 | 2 | 3  | 0.03% | 15.20% |
| XTC1-p29 | (P21926) CD9 antigen (p24) (Leukocyte antigen MIC3) (Motility-related protein) (MRP-1) (Tetraspanin 29) (Tspan-29)                                                                                                           | CD9_HUMAN   | 25268 | 100% | 2 | 3 | 5  | 0.05% | 15.40% |
| XTC1-p29 | (P21926) CD9 antigen (p24) (Leukocyte antigen MIC3) (Motility-related protein) (MRP-1) (Tetraspanin 29) (Tspan-29)                                                                                                           | CD9_HUMAN   | 25268 | 100% | 2 | 3 | 6  | 0.06% | 15.40% |
| XTC1-p29 | (P21926) CD9 antigen (p24) (Leukocyte antigen MIC3) (Motility-related protein) (MRP-1) (Tetraspanin 29) (Tspan-29)                                                                                                           | CD9_HUMAN   | 25268 | 100% | 2 | 3 | 8  | 0.07% | 15.40% |
| XTC1-p29 | (P21926) CD9 antigen (p24) (Leukocyte antigen MIC3) (Motility-related protein) (MRP-1) (Tetraspanin 29) (Tspan-29)                                                                                                           | CD9_HUMAN   | 25268 | 100% | 2 | 3 | 7  | 0.06% | 15.40% |
| XTC1-p29 | (P21926) CD9 antigen (p24) (Leukocyte antigen MIC3) (Motility-related protein) (MRP-1) (Tetraspanin 29) (Tspan-29)                                                                                                           | CD9_HUMAN   | 25268 | 100% | 2 | 2 | 5  | 0.04% | 15.40% |
| XTC1-p29 | (P22234) Multifunctional protein ADE2 [Includes: Phosphoribosylaminoimidazole-succinocarboxamide synthase (EC 6.3.2.6) (SAICAR synthetase); Phosphoribosylaminoimidazole carboxylase (EC 4.1.1.21) (AIR carboxylase) (AIRC)] | PUR6_HUMAN  | 46931 | 100% | 2 | 2 | 2  | 0.02% | 5.90%  |
| XTC1-p29 | (P22234) Multifunctional protein ADE2 [Includes: Phosphoribosylaminoimidazole-succinocarboxamide synthase (EC 6.3.2.6) (SAICAR synthetase); Phosphoribosylaminoimidazole carboxylase (EC 4.1.1.21) (AIR carboxylase) (AIRC)] | PUR6_HUMAN  | 46931 | 100% | 2 | 2 | 3  | 0.03% | 6.84%  |
| XTC1-p29 | (P22307) Nonspecific lipid-transfer protein (EC 2.3.1.176) (Propanoyl-CoA C-acyltransferase) (NSL-TP) (Sterol carrier protein 2) (SCP-2) (Sterol carrier protein X) (SCP-X) (SCP-chi) (SCPX)                                 | NLTP_HUMAN  | 58977 | 100% | 2 | 2 | 2  | 0.02% | 4.20%  |

## Protein Identified Sequence Coverage in XTC-1

|          |                                                                                                                                                                                                 |            |        |      |   |   |    |       |        |
|----------|-------------------------------------------------------------------------------------------------------------------------------------------------------------------------------------------------|------------|--------|------|---|---|----|-------|--------|
| XTC1-p29 | (P22307) Nonspecific lipid-transfer protein (EC 2.3.1.176) (Propanoyl-CoA C-acyltransferase) (NSL-TP) (Sterol carrier protein 2) (SCP-2) (Sterol carrier protein X) (SCP-X) (SCP-chi) (SCPX)    | NLTP_HUMAN | 58977  | 100% | 2 | 2 | 4  | 0.04% | 4.20%  |
| XTC1-p29 | (P22307) Nonspecific lipid-transfer protein (EC 2.3.1.176) (Propanoyl-CoA C-acyltransferase) (NSL-TP) (Sterol carrier protein 2) (SCP-2) (Sterol carrier protein X) (SCP-X) (SCP-chi) (SCPX)    | NLTP_HUMAN | 58977  | 100% | 2 | 2 | 2  | 0.02% | 4.20%  |
| XTC1-p29 | (P22392) Nucleoside diphosphate kinase B (EC 2.7.4.6) (NDK B) (NDP kinase B) (nm23-H2) (C-myc purine-binding transcription factor PUF)                                                          | NDKB_HUMAN | 17280  | 100% | 5 | 6 | 9  | 0.08% | 47.40% |
| XTC1-p29 | (P22392) Nucleoside diphosphate kinase B (EC 2.7.4.6) (NDK B) (NDP kinase B) (nm23-H2) (C-myc purine-binding transcription factor PUF)                                                          | NDKB_HUMAN | 17280  | 100% | 6 | 8 | 15 | 0.14% | 54.60% |
| XTC1-p29 | (P22392) Nucleoside diphosphate kinase B (EC 2.7.4.6) (NDK B) (NDP kinase B) (nm23-H2) (C-myc purine-binding transcription factor PUF)                                                          | NDKB_HUMAN | 17280  | 100% | 4 | 4 | 9  | 0.08% | 41.40% |
| XTC1-p29 | (P22392) Nucleoside diphosphate kinase B (EC 2.7.4.6) (NDK B) (NDP kinase B) (nm23-H2) (C-myc purine-binding transcription factor PUF)                                                          | NDKB_HUMAN | 17280  | 100% | 5 | 7 | 10 | 0.09% | 42.10% |
| XTC1-p29 | (P22392) Nucleoside diphosphate kinase B (EC 2.7.4.6) (NDK B) (NDP kinase B) (nm23-H2) (C-myc purine-binding transcription factor PUF)                                                          | NDKB_HUMAN | 17280  | 100% | 5 | 6 | 14 | 0.12% | 44.10% |
| XTC1-p29 | (P22392) Nucleoside diphosphate kinase B (EC 2.7.4.6) (NDK B) (NDP kinase B) (nm23-H2) (C-myc purine-binding transcription factor PUF)                                                          | NDKB_HUMAN | 17280  | 100% | 2 | 2 | 2  | 0.02% | 14.50% |
| XTC1-p29 | (P22392) Nucleoside diphosphate kinase B (EC 2.7.4.6) (NDK B) (NDP kinase B) (nm23-H2) (C-myc purine-binding transcription factor PUF)                                                          | NDKB_HUMAN | 17280  | 100% | 2 | 2 | 4  | 0.03% | 21.10% |
| XTC1-p29 | (P23284) Peptidyl-prolyl cis-trans isomerase B precursor (EC 5.2.1.8) (PPlase) (Rotamase) (Cyclophilin B) (S-cyclophilin) (SCYLP) (CYP-S1)                                                      | PPIB_HUMAN | 22725  | 100% | 2 | 2 | 3  | 0.03% | 11.10% |
| XTC1-p29 | (P23284) Peptidyl-prolyl cis-trans isomerase B precursor (EC 5.2.1.8) (PPlase) (Rotamase) (Cyclophilin B) (S-cyclophilin) (SCYLP) (CYP-S1)                                                      | PPIB_HUMAN | 22725  | 100% | 3 | 3 | 3  | 0.03% | 16.80% |
| XTC1-p29 | (P23284) Peptidyl-prolyl cis-trans isomerase B precursor (EC 5.2.1.8) (PPlase) (Rotamase) (Cyclophilin B) (S-cyclophilin) (SCYLP) (CYP-S1)                                                      | PPIB_HUMAN | 22725  | 100% | 3 | 3 | 5  | 0.04% | 16.80% |
| XTC1-p29 | (P23528) Cofilin-1 (Cofilin, non-muscle isoform) (18 kDa phosphoprotein) (p18)                                                                                                                  | COF1_HUMAN | 18354  | 100% | 2 | 2 | 2  | 0.02% | 25.50% |
| XTC1-p29 | (P23528) Cofilin-1 (Cofilin, non-muscle isoform) (18 kDa phosphoprotein) (p18)                                                                                                                  | COF1_HUMAN | 18354  | 100% | 2 | 3 | 4  | 0.04% | 18.80% |
| XTC1-p29 | (P23528) Cofilin-1 (Cofilin, non-muscle isoform) (18 kDa phosphoprotein) (p18)                                                                                                                  | COF1_HUMAN | 18354  | 100% | 2 | 2 | 2  | 0.02% | 20.60% |
| XTC1-p29 | (P24821) Tenascin precursor (TN) (Hexabrachion) (Cytotactin) (Neuronectin) (GMEM) (JI) (Miotendinous antigen) (Glioma-associated-extracellular matrix antigen) (GP 150-225) (Tenascin C) (TN-C) | TENA_HUMAN | 240845 | 100% | 2 | 2 | 2  | 0.02% | 1.86%  |

## Protein Identified Sequence Coverage in XTC-1

|          |                                                                                                                                                                                                 |            |        |      |   |   |    |       |       |
|----------|-------------------------------------------------------------------------------------------------------------------------------------------------------------------------------------------------|------------|--------|------|---|---|----|-------|-------|
| XTC1-p29 | (P24821) Tenascin precursor (TN) (Hexabrachion) (Cytotactin) (Neuronectin) (GMEM) (JI) (Miotendinous antigen) (Glioma-associated-extracellular matrix antigen) (GP 150-225) (Tenascin C) (TN-C) | TENA_HUMAN | 240845 | 100% | 3 | 3 | 6  | 0.05% | 2.04% |
| XTC1-p29 | (P24821) Tenascin precursor (TN) (Hexabrachion) (Cytotactin) (Neuronectin) (GMEM) (JI) (Miotendinous antigen) (Glioma-associated-extracellular matrix antigen) (GP 150-225) (Tenascin C) (TN-C) | TENA_HUMAN | 240845 | 100% | 2 | 2 | 2  | 0.02% | 2.00% |
| XTC1-p29 | (P24821) Tenascin precursor (TN) (Hexabrachion) (Cytotactin) (Neuronectin) (GMEM) (JI) (Miotendinous antigen) (Glioma-associated-extracellular matrix antigen) (GP 150-225) (Tenascin C) (TN-C) | TENA_HUMAN | 240845 | 100% | 8 | 8 | 10 | 0.09% | 6.22% |
| XTC1-p29 | (P24821) Tenascin precursor (TN) (Hexabrachion) (Cytotactin) (Neuronectin) (GMEM) (JI) (Miotendinous antigen) (Glioma-associated-extracellular matrix antigen) (GP 150-225) (Tenascin C) (TN-C) | TENA_HUMAN | 240845 | 100% | 6 | 6 | 7  | 0.06% | 4.50% |
| XTC1-p29 | (P24821) Tenascin precursor (TN) (Hexabrachion) (Cytotactin) (Neuronectin) (GMEM) (JI) (Miotendinous antigen) (Glioma-associated-extracellular matrix antigen) (GP 150-225) (Tenascin C) (TN-C) | TENA_HUMAN | 240845 | 100% | 7 | 7 | 10 | 0.09% | 4.36% |
| XTC1-p29 | (P24821) Tenascin precursor (TN) (Hexabrachion) (Cytotactin) (Neuronectin) (GMEM) (JI) (Miotendinous antigen) (Glioma-associated-extracellular matrix antigen) (GP 150-225) (Tenascin C) (TN-C) | TENA_HUMAN | 240845 | 100% | 5 | 5 | 6  | 0.06% | 5.18% |
| XTC1-p29 | (P24821) Tenascin precursor (TN) (Hexabrachion) (Cytotactin) (Neuronectin) (GMEM) (JI) (Miotendinous antigen) (Glioma-associated-extracellular matrix antigen) (GP 150-225) (Tenascin C) (TN-C) | TENA_HUMAN | 240845 | 100% | 2 | 2 | 2  | 0.02% | 2.64% |
| XTC1-p29 | (P24821) Tenascin precursor (TN) (Hexabrachion) (Cytotactin) (Neuronectin) (GMEM) (JI) (Miotendinous antigen) (Glioma-associated-extracellular matrix antigen) (GP 150-225) (Tenascin C) (TN-C) | TENA_HUMAN | 240845 | 100% | 6 | 6 | 7  | 0.06% | 5.72% |
| XTC1-p29 | (P24821) Tenascin precursor (TN) (Hexabrachion) (Cytotactin) (Neuronectin) (GMEM) (JI) (Miotendinous antigen) (Glioma-associated-extracellular matrix antigen) (GP 150-225) (Tenascin C) (TN-C) | TENA_HUMAN | 240845 | 100% | 3 | 4 | 5  | 0.04% | 3.23% |
| XTC1-p29 | (P24821) Tenascin precursor (TN) (Hexabrachion) (Cytotactin) (Neuronectin) (GMEM) (JI) (Miotendinous antigen) (Glioma-associated-extracellular matrix antigen) (GP 150-225) (Tenascin C) (TN-C) | TENA_HUMAN | 240845 | 100% | 2 | 2 | 2  | 0.02% | 2.64% |
| XTC1-p29 | (P26006) Integrin alpha-3 precursor (Galactoprotein B3) (GAPB3) (VLA-3 alpha chain) (FRP-2) (CD49c antigen) [Contains: Integrin alpha-3 heavy chain; Integrin alpha-3 light chain]              | ITA3_HUMAN | 118682 | 100% | 3 | 3 | 4  | 0.04% | 4.22% |

## Protein Identified Sequence Coverage in XTC-1

|          |                                                                                                                                                                                                                                                    |             |        |      |   |   |    |       |        |
|----------|----------------------------------------------------------------------------------------------------------------------------------------------------------------------------------------------------------------------------------------------------|-------------|--------|------|---|---|----|-------|--------|
| XTC1-p29 | (P26006) Integrin alpha-3 precursor (Galactoprotein B3) (GAPB3) (VLA-3 alpha chain) (FRP-2) (CD49c antigen) [Contains: Integrin alpha-3 heavy chain; Integrin alpha-3 light chain]                                                                 | ITA3_HUMAN  | 118682 | 100% | 2 | 2 | 2  | 0.02% | 3.19%  |
| XTC1-p29 | (P26006) Integrin alpha-3 precursor (Galactoprotein B3) (GAPB3) (VLA-3 alpha chain) (FRP-2) (CD49c antigen) [Contains: Integrin alpha-3 heavy chain; Integrin alpha-3 light chain]                                                                 | ITA3_HUMAN  | 118682 | 100% | 2 | 2 | 2  | 0.02% | 1.88%  |
| XTC1-p29 | (P26038) Moesin (Membrane-organizing extension spike protein)                                                                                                                                                                                      | MOES_HUMAN  | 67673  | 100% | 5 | 6 | 7  | 0.06% | 12.30% |
| XTC1-p29 | (P26038) Moesin (Membrane-organizing extension spike protein)                                                                                                                                                                                      | MOES_HUMAN  | 67673  | 100% | 4 | 4 | 4  | 0.04% | 6.60%  |
| XTC1-p29 | (P26038) Moesin (Membrane-organizing extension spike protein)                                                                                                                                                                                      | MOES_HUMAN  | 67673  | 100% | 4 | 4 | 5  | 0.04% | 10.20% |
| XTC1-p29 | (P26038) Moesin (Membrane-organizing extension spike protein)                                                                                                                                                                                      | MOES_HUMAN  | 67673  | 100% | 5 | 5 | 7  | 0.07% | 15.60% |
| XTC1-p29 | (P26038) Moesin (Membrane-organizing extension spike protein)                                                                                                                                                                                      | MOES_HUMAN  | 67673  | 100% | 3 | 4 | 4  | 0.03% | 7.99%  |
| XTC1-p29 | (P26038) Moesin (Membrane-organizing extension spike protein)                                                                                                                                                                                      | MOES_HUMAN  | 67673  | 100% | 4 | 5 | 7  | 0.06% | 14.40% |
| XTC1-p29 | (P26038) Moesin (Membrane-organizing extension spike protein)                                                                                                                                                                                      | MOES_HUMAN  | 67673  | 100% | 2 | 2 | 2  | 0.02% | 6.08%  |
| XTC1-p29 | (P27348) 14-3-3 protein theta (14-3-3 protein tau) (14-3-3 protein T-cell) (HS1 protein)                                                                                                                                                           | 1433T_HUMAN | 27747  | 100% | 2 | 2 | 2  | 0.02% | 15.50% |
| XTC1-p29 | (P27487) Dipeptidyl peptidase 4 (EC 3.4.14.5) (Dipeptidyl peptidase IV) (DPP IV) (T-cell activation antigen CD26) (TP103) (Adenosine deaminase complexing protein 2) (ADABP) [Contains: Dipeptidyl peptidase 4 membrane form (Dipeptidyl peptidase | DPP4_HUMAN  | 88263  | 100% | 5 | 5 | 9  | 0.09% | 9.40%  |
| XTC1-p29 | (P27487) Dipeptidyl peptidase 4 (EC 3.4.14.5) (Dipeptidyl peptidase IV) (DPP IV) (T-cell activation antigen CD26) (TP103) (Adenosine deaminase complexing protein 2) (ADABP) [Contains: Dipeptidyl peptidase 4 membrane form (Dipeptidyl peptidase | DPP4_HUMAN  | 88263  | 100% | 7 | 7 | 7  | 0.07% | 15.30% |
| XTC1-p29 | (P27487) Dipeptidyl peptidase 4 (EC 3.4.14.5) (Dipeptidyl peptidase IV) (DPP IV) (T-cell activation antigen CD26) (TP103) (Adenosine deaminase complexing protein 2) (ADABP) [Contains: Dipeptidyl peptidase 4 membrane form (Dipeptidyl peptidase | DPP4_HUMAN  | 88263  | 100% | 8 | 9 | 9  | 0.08% | 16.40% |
| XTC1-p29 | (P27487) Dipeptidyl peptidase 4 (EC 3.4.14.5) (Dipeptidyl peptidase IV) (DPP IV) (T-cell activation antigen CD26) (TP103) (Adenosine deaminase complexing protein 2) (ADABP) [Contains: Dipeptidyl peptidase 4 membrane form (Dipeptidyl peptidase | DPP4_HUMAN  | 88263  | 100% | 8 | 9 | 12 | 0.11% | 14.40% |

## Protein Identified Sequence Coverage in XTC-1

|          |                                                                                                                                                                                                                                                    |             |       |      |    |    |    |       |        |
|----------|----------------------------------------------------------------------------------------------------------------------------------------------------------------------------------------------------------------------------------------------------|-------------|-------|------|----|----|----|-------|--------|
| XTC1-p29 | (P27487) Dipeptidyl peptidase 4 (EC 3.4.14.5) (Dipeptidyl peptidase IV) (DPP IV) (T-cell activation antigen CD26) (TP103) (Adenosine deaminase complexing protein 2) (ADABP) [Contains: Dipeptidyl peptidase 4 membrane form (Dipeptidyl peptidase | DPP4_HUMAN  | 88263 | 100% | 2  | 2  | 2  | 0.02% | 4.57%  |
| XTC1-p29 | (P27487) Dipeptidyl peptidase 4 (EC 3.4.14.5) (Dipeptidyl peptidase IV) (DPP IV) (T-cell activation antigen CD26) (TP103) (Adenosine deaminase complexing protein 2) (ADABP) [Contains: Dipeptidyl peptidase 4 membrane form (Dipeptidyl peptidase | DPP4_HUMAN  | 88263 | 100% | 5  | 5  | 7  | 0.06% | 10.70% |
| XTC1-p29 | (P27487) Dipeptidyl peptidase 4 (EC 3.4.14.5) (Dipeptidyl peptidase IV) (DPP IV) (T-cell activation antigen CD26) (TP103) (Adenosine deaminase complexing protein 2) (ADABP) [Contains: Dipeptidyl peptidase 4 membrane form (Dipeptidyl peptidase | DPP4_HUMAN  | 88263 | 100% | 4  | 4  | 5  | 0.04% | 9.14%  |
| XTC1-p29 | (P27487) Dipeptidyl peptidase 4 (EC 3.4.14.5) (Dipeptidyl peptidase IV) (DPP IV) (T-cell activation antigen CD26) (TP103) (Adenosine deaminase complexing protein 2) (ADABP) [Contains: Dipeptidyl peptidase 4 membrane form (Dipeptidyl peptidase | DPP4_HUMAN  | 88263 | 100% | 5  | 5  | 9  | 0.08% | 9.40%  |
| XTC1-p29 | (P27487) Dipeptidyl peptidase 4 (EC 3.4.14.5) (Dipeptidyl peptidase IV) (DPP IV) (T-cell activation antigen CD26) (TP103) (Adenosine deaminase complexing protein 2) (ADABP) [Contains: Dipeptidyl peptidase 4 membrane form (Dipeptidyl peptidase | DPP4_HUMAN  | 88263 | 100% | 2  | 2  | 4  | 0.04% | 4.96%  |
| XTC1-p29 | (P27487) Dipeptidyl peptidase 4 (EC 3.4.14.5) (Dipeptidyl peptidase IV) (DPP IV) (T-cell activation antigen CD26) (TP103) (Adenosine deaminase complexing protein 2) (ADABP) [Contains: Dipeptidyl peptidase 4 membrane form (Dipeptidyl peptidase | DPP4_HUMAN  | 88263 | 100% | 3  | 3  | 3  | 0.03% | 5.09%  |
| XTC1-p29 | (P27487) Dipeptidyl peptidase 4 (EC 3.4.14.5) (Dipeptidyl peptidase IV) (DPP IV) (T-cell activation antigen CD26) (TP103) (Adenosine deaminase complexing protein 2) (ADABP) [Contains: Dipeptidyl peptidase 4 membrane form (Dipeptidyl peptidase | DPP4_HUMAN  | 88263 | 100% | 2  | 2  | 3  | 0.03% | 3.52%  |
| XTC1-p29 | (P27487) Dipeptidyl peptidase 4 (EC 3.4.14.5) (Dipeptidyl peptidase IV) (DPP IV) (T-cell activation antigen CD26) (TP103) (Adenosine deaminase complexing protein 2) (ADABP) [Contains: Dipeptidyl peptidase 4 membrane form (Dipeptidyl peptidase | DPP4_HUMAN  | 88263 | 100% | 2  | 2  | 10 | 0.09% | 6.01%  |
| XTC1-p29 | (P27695) DNA-(apurinic or apyrimidinic site) lyase (EC 4.2.99.18) (AP endonuclease 1) (APEX nuclease) (APEN) (REF-1 protein)                                                                                                                       | APEX1_HUMAN | 35407 | 100% | 2  | 2  | 3  | 0.03% | 8.52%  |
| XTC1-p29 | (P27797) Calreticulin precursor (CRP55) (Calregulin) (HACBP) (ERp60) (grp60)                                                                                                                                                                       | CRTC_HUMAN  | 48125 | 100% | 9  | 9  | 14 | 0.13% | 42.70% |
| XTC1-p29 | (P27797) Calreticulin precursor (CRP55) (Calregulin) (HACBP) (ERp60) (grp60)                                                                                                                                                                       | CRTC_HUMAN  | 48125 | 100% | 11 | 14 | 23 | 0.21% | 43.90% |

## Protein Identified Sequence Coverage in XTC-1

|          |                                                                                                                                                                                                                                                                  |            |       |      |    |    |    |       |        |
|----------|------------------------------------------------------------------------------------------------------------------------------------------------------------------------------------------------------------------------------------------------------------------|------------|-------|------|----|----|----|-------|--------|
| XTC1-p29 | (P27797) Calreticulin precursor (CRP55)<br>(Calregulin) (HACBP) (ERp60) (grp60)                                                                                                                                                                                  | CRTC_HUMAN | 48125 | 100% | 5  | 5  | 9  | 0.08% | 26.10% |
| XTC1-p29 | (P27797) Calreticulin precursor (CRP55)<br>(Calregulin) (HACBP) (ERp60) (grp60)                                                                                                                                                                                  | CRTC_HUMAN | 48125 | 100% | 11 | 13 | 20 | 0.18% | 46.00% |
| XTC1-p29 | (P27797) Calreticulin precursor (CRP55)<br>(Calregulin) (HACBP) (ERp60) (grp60)                                                                                                                                                                                  | CRTC_HUMAN | 48125 | 100% | 9  | 9  | 16 | 0.14% | 33.60% |
| XTC1-p29 | (P27797) Calreticulin precursor (CRP55)<br>(Calregulin) (HACBP) (ERp60) (grp60)                                                                                                                                                                                  | CRTC_HUMAN | 48125 | 100% | 8  | 8  | 15 | 0.14% | 36.20% |
| XTC1-p29 | (P27797) Calreticulin precursor (CRP55)<br>(Calregulin) (HACBP) (ERp60) (grp60)                                                                                                                                                                                  | CRTC_HUMAN | 48125 | 100% | 4  | 5  | 11 | 0.09% | 16.80% |
| XTC1-p29 | (P27797) Calreticulin precursor (CRP55)<br>(Calregulin) (HACBP) (ERp60) (grp60)                                                                                                                                                                                  | CRTC_HUMAN | 48125 | 100% | 2  | 2  | 3  | 0.03% | 16.30% |
| XTC1-p29 | (P27797) Calreticulin precursor (CRP55)<br>(Calregulin) (HACBP) (ERp60) (grp60)                                                                                                                                                                                  | CRTC_HUMAN | 48125 | 100% | 6  | 8  | 12 | 0.10% | 26.90% |
| XTC1-p29 | (P27797) Calreticulin precursor (CRP55)<br>(Calregulin) (HACBP) (ERp60) (grp60)                                                                                                                                                                                  | CRTC_HUMAN | 48125 | 100% | 2  | 2  | 2  | 0.02% | 15.60% |
| XTC1-p29 | (P27797) Calreticulin precursor (CRP55)<br>(Calregulin) (HACBP) (ERp60) (grp60)                                                                                                                                                                                  | CRTC_HUMAN | 48125 | 100% | 5  | 6  | 19 | 0.17% | 28.80% |
| XTC1-p29 | (P27797) Calreticulin precursor (CRP55)<br>(Calregulin) (HACBP) (ERp60) (grp60)                                                                                                                                                                                  | CRTC_HUMAN | 48125 | 100% | 4  | 6  | 28 | 0.24% | 25.40% |
| XTC1-p29 | (P27797) Calreticulin precursor (CRP55)<br>(Calregulin) (HACBP) (ERp60) (grp60)                                                                                                                                                                                  | CRTC_HUMAN | 48125 | 100% | 2  | 2  | 4  | 0.04% | 14.40% |
| XTC1-p29 | (P27824) Calnexin precursor (Major<br>histocompatibility complex class I antigen-binding<br>protein p88) (p90) (IP90)                                                                                                                                            | CALX_HUMAN | 67552 | 100% | 2  | 2  | 3  | 0.03% | 4.22%  |
| XTC1-p29 | (P27824) Calnexin precursor (Major<br>histocompatibility complex class I antigen-binding<br>protein p88) (p90) (IP90)                                                                                                                                            | CALX_HUMAN | 67552 | 100% | 2  | 2  | 2  | 0.02% | 4.22%  |
| XTC1-p29 | (P28799) Granulins precursor (Proepithelin) (PEPI)<br>[Contains: Acrogranin; Paragranulin; Granulin-1<br>(Granulin G); Granulin-2 (Granulin F); Granulin-3<br>(Granulin B); Granulin-4 (Granulin A); Granulin-5<br>(Granulin C); Granulin-6 (Granulin D); Granul | GRN_HUMAN  | 63522 | 100% | 2  | 2  | 2  | 0.02% | 2.36%  |
| XTC1-p29 | (P28799) Granulins precursor (Proepithelin) (PEPI)<br>[Contains: Acrogranin; Paragranulin; Granulin-1<br>(Granulin G); Granulin-2 (Granulin F); Granulin-3<br>(Granulin B); Granulin-4 (Granulin A); Granulin-5<br>(Granulin C); Granulin-6 (Granulin D); Granul | GRN_HUMAN  | 63522 | 100% | 2  | 2  | 2  | 0.02% | 8.26%  |
| XTC1-p29 | (P28799) Granulins precursor (Proepithelin) (PEPI)<br>[Contains: Acrogranin; Paragranulin; Granulin-1<br>(Granulin G); Granulin-2 (Granulin F); Granulin-3<br>(Granulin B); Granulin-4 (Granulin A); Granulin-5<br>(Granulin C); Granulin-6 (Granulin D); Granul | GRN_HUMAN  | 63522 | 100% | 3  | 3  | 6  | 0.05% | 5.40%  |
| XTC1-p29 | (P28799) Granulins precursor (Proepithelin) (PEPI)<br>[Contains: Acrogranin; Paragranulin; Granulin-1<br>(Granulin G); Granulin-2 (Granulin F); Granulin-3<br>(Granulin B); Granulin-4 (Granulin A); Granulin-5<br>(Granulin C); Granulin-6 (Granulin D); Granul | GRN_HUMAN  | 63522 | 100% | 2  | 2  | 2  | 0.02% | 8.26%  |



## Protein Identified Sequence Coverage in XTC-1

|          |                                                                                                                                                                                                                                                         |             |        |      |   |   |    |       |        |
|----------|---------------------------------------------------------------------------------------------------------------------------------------------------------------------------------------------------------------------------------------------------------|-------------|--------|------|---|---|----|-------|--------|
| XTC1-p29 | (P28799) Granulins precursor (Proepithelin) (PEPI)<br>[Contains: Acrogranin; Paragranulin; Granulin-1 (Granulin G); Granulin-2 (Granulin F); Granulin-3 (Granulin B); Granulin-4 (Granulin A); Granulin-5 (Granulin C); Granulin-6 (Granulin D); Granul | GRN_HUMAN   | 63522  | 100% | 3 | 3 | 5  | 0.05% | 6.24%  |
| XTC1-p29 | (P28799) Granulins precursor (Proepithelin) (PEPI)<br>[Contains: Acrogranin; Paragranulin; Granulin-1 (Granulin G); Granulin-2 (Granulin F); Granulin-3 (Granulin B); Granulin-4 (Granulin A); Granulin-5 (Granulin C); Granulin-6 (Granulin D); Granul | GRN_HUMAN   | 63522  | 100% | 3 | 3 | 6  | 0.06% | 6.24%  |
| XTC1-p29 | (P28799) Granulins precursor (Proepithelin) (PEPI)<br>[Contains: Acrogranin; Paragranulin; Granulin-1 (Granulin G); Granulin-2 (Granulin F); Granulin-3 (Granulin B); Granulin-4 (Granulin A); Granulin-5 (Granulin C); Granulin-6 (Granulin D); Granul | GRN_HUMAN   | 63522  | 100% | 3 | 3 | 6  | 0.05% | 6.24%  |
| XTC1-p29 | (P28799) Granulins precursor (Proepithelin) (PEPI)<br>[Contains: Acrogranin; Paragranulin; Granulin-1 (Granulin G); Granulin-2 (Granulin F); Granulin-3 (Granulin B); Granulin-4 (Granulin A); Granulin-5 (Granulin C); Granulin-6 (Granulin D); Granul | GRN_HUMAN   | 63522  | 100% | 6 | 6 | 9  | 0.08% | 13.50% |
| XTC1-p29 | (P28799) Granulins precursor (Proepithelin) (PEPI)<br>[Contains: Acrogranin; Paragranulin; Granulin-1 (Granulin G); Granulin-2 (Granulin F); Granulin-3 (Granulin B); Granulin-4 (Granulin A); Granulin-5 (Granulin C); Granulin-6 (Granulin D); Granul | GRN_HUMAN   | 63522  | 100% | 3 | 3 | 3  | 0.03% | 17.40% |
| XTC1-p29 | (P28799) Granulins precursor (Proepithelin) (PEPI)<br>[Contains: Acrogranin; Paragranulin; Granulin-1 (Granulin G); Granulin-2 (Granulin F); Granulin-3 (Granulin B); Granulin-4 (Granulin A); Granulin-5 (Granulin C); Granulin-6 (Granulin D); Granul | GRN_HUMAN   | 63522  | 100% | 2 | 2 | 2  | 0.02% | 4.55%  |
| XTC1-p29 | (P29323) Ephrin type-B receptor 2 precursor (EC 2.7.10.1) (Tyrosine-protein kinase receptor EPH-3) (DRT) (Receptor protein-tyrosine kinase HEK5) (ERK) (NY-REN-47 antigen)                                                                              | EPHB2_HUMAN | 117476 | 100% | 2 | 2 | 2  | 0.02% | 2.75%  |
| XTC1-p29 | (P29401) Transketolase (EC 2.2.1.1) (TK)                                                                                                                                                                                                                | TKT_HUMAN   | 67861  | 100% | 2 | 2 | 2  | 0.02% | 5.78%  |
| XTC1-p29 | (P29401) Transketolase (EC 2.2.1.1) (TK)                                                                                                                                                                                                                | TKT_HUMAN   | 67861  | 100% | 2 | 2 | 2  | 0.02% | 6.90%  |
| XTC1-p29 | (P29401) Transketolase (EC 2.2.1.1) (TK)                                                                                                                                                                                                                | TKT_HUMAN   | 67861  | 100% | 2 | 2 | 3  | 0.03% | 8.83%  |
| XTC1-p29 | (P30040) Endoplasmic reticulum protein ERp29 precursor (ERp31) (ERp28)                                                                                                                                                                                  | ERP29_HUMAN | 28977  | 100% | 6 | 6 | 11 | 0.10% | 41.40% |
| XTC1-p29 | (P30040) Endoplasmic reticulum protein ERp29 precursor (ERp31) (ERp28)                                                                                                                                                                                  | ERP29_HUMAN | 28977  | 100% | 6 | 7 | 13 | 0.12% | 41.40% |
| XTC1-p29 | (P30040) Endoplasmic reticulum protein ERp29 precursor (ERp31) (ERp28)                                                                                                                                                                                  | ERP29_HUMAN | 28977  | 100% | 4 | 4 | 5  | 0.05% | 31.00% |
| XTC1-p29 | (P30040) Endoplasmic reticulum protein ERp29 precursor (ERp31) (ERp28)                                                                                                                                                                                  | ERP29_HUMAN | 28977  | 100% | 7 | 7 | 10 | 0.09% | 45.20% |
| XTC1-p29 | (P30040) Endoplasmic reticulum protein ERp29 precursor (ERp31) (ERp28)                                                                                                                                                                                  | ERP29_HUMAN | 28977  | 100% | 5 | 5 | 9  | 0.08% | 23.80% |
| XTC1-p29 | (P30040) Endoplasmic reticulum protein ERp29 precursor (ERp31) (ERp28)                                                                                                                                                                                  | ERP29_HUMAN | 28977  | 100% | 2 | 2 | 2  | 0.02% | 11.50% |

## Protein Identified Sequence Coverage in XTC-1

|          |                                                                                                                                                                                                                                                    |             |       |      |   |    |    |       |        |
|----------|----------------------------------------------------------------------------------------------------------------------------------------------------------------------------------------------------------------------------------------------------|-------------|-------|------|---|----|----|-------|--------|
| XTC1-p29 | (P30040) Endoplasmic reticulum protein ERp29 precursor (ERp31) (ERp28)                                                                                                                                                                             | ERP29_HUMAN | 28977 | 100% | 3 | 4  | 9  | 0.08% | 25.30% |
| XTC1-p29 | (P30040) Endoplasmic reticulum protein ERp29 precursor (ERp31) (ERp28)                                                                                                                                                                             | ERP29_HUMAN | 28977 | 100% | 3 | 3  | 4  | 0.04% | 25.30% |
| XTC1-p29 | (P30041) Peroxiredoxin-6 (EC 1.11.1.15) (Antioxidant protein 2) (1-Cys peroxiredoxin) (1-Cys PRX) (Acidic calcium-independent phospholipase A2) (EC 3.1.1.-) (aiPLA2) (Non-selenium glutathione peroxidase) (EC 1.11.1.7) (NSGPx) (24 kDa protein) | PRDX6_HUMAN | 24887 | 100% | 5 | 5  | 10 | 0.09% | 31.80% |
| XTC1-p29 | (P30041) Peroxiredoxin-6 (EC 1.11.1.15) (Antioxidant protein 2) (1-Cys peroxiredoxin) (1-Cys PRX) (Acidic calcium-independent phospholipase A2) (EC 3.1.1.-) (aiPLA2) (Non-selenium glutathione peroxidase) (EC 1.11.1.7) (NSGPx) (24 kDa protein) | PRDX6_HUMAN | 24887 | 100% | 5 | 7  | 11 | 0.10% | 33.60% |
| XTC1-p29 | (P30041) Peroxiredoxin-6 (EC 1.11.1.15) (Antioxidant protein 2) (1-Cys peroxiredoxin) (1-Cys PRX) (Acidic calcium-independent phospholipase A2) (EC 3.1.1.-) (aiPLA2) (Non-selenium glutathione peroxidase) (EC 1.11.1.7) (NSGPx) (24 kDa protein) | PRDX6_HUMAN | 24887 | 100% | 4 | 5  | 10 | 0.09% | 32.30% |
| XTC1-p29 | (P30041) Peroxiredoxin-6 (EC 1.11.1.15) (Antioxidant protein 2) (1-Cys peroxiredoxin) (1-Cys PRX) (Acidic calcium-independent phospholipase A2) (EC 3.1.1.-) (aiPLA2) (Non-selenium glutathione peroxidase) (EC 1.11.1.7) (NSGPx) (24 kDa protein) | PRDX6_HUMAN | 24887 | 100% | 9 | 10 | 15 | 0.13% | 57.00% |
| XTC1-p29 | (P30041) Peroxiredoxin-6 (EC 1.11.1.15) (Antioxidant protein 2) (1-Cys peroxiredoxin) (1-Cys PRX) (Acidic calcium-independent phospholipase A2) (EC 3.1.1.-) (aiPLA2) (Non-selenium glutathione peroxidase) (EC 1.11.1.7) (NSGPx) (24 kDa protein) | PRDX6_HUMAN | 24887 | 100% | 9 | 11 | 19 | 0.17% | 64.60% |
| XTC1-p29 | (P30041) Peroxiredoxin-6 (EC 1.11.1.15) (Antioxidant protein 2) (1-Cys peroxiredoxin) (1-Cys PRX) (Acidic calcium-independent phospholipase A2) (EC 3.1.1.-) (aiPLA2) (Non-selenium glutathione peroxidase) (EC 1.11.1.7) (NSGPx) (24 kDa protein) | PRDX6_HUMAN | 24887 | 100% | 4 | 5  | 6  | 0.05% | 24.70% |
| XTC1-p29 | (P30041) Peroxiredoxin-6 (EC 1.11.1.15) (Antioxidant protein 2) (1-Cys peroxiredoxin) (1-Cys PRX) (Acidic calcium-independent phospholipase A2) (EC 3.1.1.-) (aiPLA2) (Non-selenium glutathione peroxidase) (EC 1.11.1.7) (NSGPx) (24 kDa protein) | PRDX6_HUMAN | 24887 | 100% | 2 | 3  | 8  | 0.07% | 15.70% |
| XTC1-p29 | (P30041) Peroxiredoxin-6 (EC 1.11.1.15) (Antioxidant protein 2) (1-Cys peroxiredoxin) (1-Cys PRX) (Acidic calcium-independent phospholipase A2) (EC 3.1.1.-) (aiPLA2) (Non-selenium glutathione peroxidase) (EC 1.11.1.7) (NSGPx) (24 kDa protein) | PRDX6_HUMAN | 24887 | 100% | 3 | 5  | 15 | 0.13% | 26.50% |

## Protein Identified Sequence Coverage in XTC-1

|          |                                                                                                                                                                                                                                                    |             |       |      |    |    |    |       |        |
|----------|----------------------------------------------------------------------------------------------------------------------------------------------------------------------------------------------------------------------------------------------------|-------------|-------|------|----|----|----|-------|--------|
| XTC1-p29 | (P30044) Peroxiredoxin-5, mitochondrial precursor (EC 1.11.1.15) (Prx-V) (Peroxisomal antioxidant enzyme) (PLP) (Thioredoxin reductase) (Thioredoxin peroxidase PMP20) (Antioxidant enzyme B166) (AOEB166) (TPx type VI) (Liver tissue 2D-page spo | PRDX5_HUMAN | 22008 | 100% | 3  | 3  | 4  | 0.04% | 19.60% |
| XTC1-p29 | (P30044) Peroxiredoxin-5, mitochondrial precursor (EC 1.11.1.15) (Prx-V) (Peroxisomal antioxidant enzyme) (PLP) (Thioredoxin reductase) (Thioredoxin peroxidase PMP20) (Antioxidant enzyme B166) (AOEB166) (TPx type VI) (Liver tissue 2D-page spo | PRDX5_HUMAN | 22008 | 100% | 2  | 2  | 4  | 0.04% | 13.10% |
| XTC1-p29 | (P30044) Peroxiredoxin-5, mitochondrial precursor (EC 1.11.1.15) (Prx-V) (Peroxisomal antioxidant enzyme) (PLP) (Thioredoxin reductase) (Thioredoxin peroxidase PMP20) (Antioxidant enzyme B166) (AOEB166) (TPx type VI) (Liver tissue 2D-page spo | PRDX5_HUMAN | 22008 | 100% | 3  | 3  | 3  | 0.03% | 21.50% |
| XTC1-p29 | (P30044) Peroxiredoxin-5, mitochondrial precursor (EC 1.11.1.15) (Prx-V) (Peroxisomal antioxidant enzyme) (PLP) (Thioredoxin reductase) (Thioredoxin peroxidase PMP20) (Antioxidant enzyme B166) (AOEB166) (TPx type VI) (Liver tissue 2D-page spo | PRDX5_HUMAN | 22008 | 100% | 2  | 2  | 3  | 0.03% | 13.10% |
| XTC1-p29 | (P30044) Peroxiredoxin-5, mitochondrial precursor (EC 1.11.1.15) (Prx-V) (Peroxisomal antioxidant enzyme) (PLP) (Thioredoxin reductase) (Thioredoxin peroxidase PMP20) (Antioxidant enzyme B166) (AOEB166) (TPx type VI) (Liver tissue 2D-page spo | PRDX5_HUMAN | 22008 | 100% | 3  | 3  | 4  | 0.03% | 23.80% |
| XTC1-p29 | (P30050) 60S ribosomal protein L12                                                                                                                                                                                                                 | RL12_HUMAN  | 17801 | 100% | 2  | 2  | 2  | 0.02% | 18.80% |
| XTC1-p29 | (P30101) Protein disulfide-isomerase A3 precursor (EC 5.3.4.1) (Disulfide isomerase ER-60) (ERp60) (58 kDa microsomal protein) (p58) (ERp57) (58 kDa glucose-regulated protein)                                                                    | PDIA3_HUMAN | 56767 | 100% | 5  | 5  | 8  | 0.07% | 13.90% |
| XTC1-p29 | (P30101) Protein disulfide-isomerase A3 precursor (EC 5.3.4.1) (Disulfide isomerase ER-60) (ERp60) (58 kDa microsomal protein) (p58) (ERp57) (58 kDa glucose-regulated protein)                                                                    | PDIA3_HUMAN | 56767 | 100% | 8  | 8  | 14 | 0.13% | 22.00% |
| XTC1-p29 | (P30101) Protein disulfide-isomerase A3 precursor (EC 5.3.4.1) (Disulfide isomerase ER-60) (ERp60) (58 kDa microsomal protein) (p58) (ERp57) (58 kDa glucose-regulated protein)                                                                    | PDIA3_HUMAN | 56767 | 100% | 4  | 4  | 6  | 0.05% | 14.10% |
| XTC1-p29 | (P30101) Protein disulfide-isomerase A3 precursor (EC 5.3.4.1) (Disulfide isomerase ER-60) (ERp60) (58 kDa microsomal protein) (p58) (ERp57) (58 kDa glucose-regulated protein)                                                                    | PDIA3_HUMAN | 56767 | 100% | 9  | 9  | 11 | 0.10% | 22.40% |
| XTC1-p29 | (P30101) Protein disulfide-isomerase A3 precursor (EC 5.3.4.1) (Disulfide isomerase ER-60) (ERp60) (58 kDa microsomal protein) (p58) (ERp57) (58 kDa glucose-regulated protein)                                                                    | PDIA3_HUMAN | 56767 | 100% | 10 | 11 | 19 | 0.17% | 23.80% |
| XTC1-p29 | (P30101) Protein disulfide-isomerase A3 precursor (EC 5.3.4.1) (Disulfide isomerase ER-60) (ERp60) (58 kDa microsomal protein) (p58) (ERp57) (58 kDa glucose-regulated protein)                                                                    | PDIA3_HUMAN | 56767 | 100% | 6  | 6  | 8  | 0.07% | 12.70% |

## Protein Identified Sequence Coverage in XTC-1

|          |                                                                                                                                                                                 |                 |       |      |   |   |   |       |        |
|----------|---------------------------------------------------------------------------------------------------------------------------------------------------------------------------------|-----------------|-------|------|---|---|---|-------|--------|
| XTC1-p29 | (P30101) Protein disulfide-isomerase A3 precursor (EC 5.3.4.1) (Disulfide isomerase ER-60) (ERp60) (58 kDa microsomal protein) (p58) (ERp57) (58 kDa glucose-regulated protein) | PDIA3_HUMAN     | 56767 | 100% | 3 | 3 | 6 | 0.05% | 14.70% |
| XTC1-p29 | (P30447) HLA class I histocompatibility antigen, A-23 alpha chain precursor (MHC class I antigen A*23) (A-9)                                                                    | 1A23_HUMAN,1A24 | 40714 | 100% | 2 | 2 | 4 | 0.04% | 7.67%  |
| XTC1-p29 | (P30447) HLA class I histocompatibility antigen, A-23 alpha chain precursor (MHC class I antigen A*23) (A-9)                                                                    | 1A23_HUMAN,1A24 | 40670 | 100% | 3 | 3 | 5 | 0.05% | 13.70% |
| XTC1-p29 | (P30447) HLA class I histocompatibility antigen, A-23 alpha chain precursor (MHC class I antigen A*23) (A-9)                                                                    | 1A23_HUMAN,1A24 | 40670 | 100% | 2 | 2 | 2 | 0.02% | 7.12%  |
| XTC1-p29 | (P30447) HLA class I histocompatibility antigen, A-23 alpha chain precursor (MHC class I antigen A*23) (A-9)                                                                    | 1A23_HUMAN,1A24 | 40670 | 100% | 3 | 3 | 6 | 0.05% | 13.70% |
| XTC1-p29 | (P30447) HLA class I histocompatibility antigen, A-23 alpha chain precursor (MHC class I antigen A*23) (A-9)                                                                    | 1A23_HUMAN,1A24 | 40714 | 100% | 2 | 2 | 2 | 0.02% | 13.70% |
| XTC1-p29 | (P30447) HLA class I histocompatibility antigen, A-23 alpha chain precursor (MHC class I antigen A*23) (A-9)                                                                    | 1A23_HUMAN,1A24 | 40714 | 100% | 2 | 3 | 3 | 0.03% | 7.67%  |
| XTC1-p29 | (P30481) HLA class I histocompatibility antigen, B-44 alpha chain precursor (MHC class I antigen B*44) (Bw-44)                                                                  | 1B44_HUMAN      | 40463 | 100% | 2 | 3 | 3 | 0.03% | 4.97%  |
| XTC1-p29 | (P30481) HLA class I histocompatibility antigen, B-44 alpha chain precursor (MHC class I antigen B*44) (Bw-44)                                                                  | 1B44_HUMAN      | 40463 | 100% | 2 | 2 | 3 | 0.03% | 7.73%  |
| XTC1-p29 | (P30481) HLA class I histocompatibility antigen, B-44 alpha chain precursor (MHC class I antigen B*44) (Bw-44)                                                                  | 1B44_HUMAN      | 40463 | 100% | 3 | 3 | 4 | 0.04% | 18.20% |
| XTC1-p29 | (P30481) HLA class I histocompatibility antigen, B-44 alpha chain precursor (MHC class I antigen B*44) (Bw-44)                                                                  | 1B44_HUMAN      | 40463 | 100% | 3 | 3 | 5 | 0.05% | 16.60% |
| XTC1-p29 | (P30481) HLA class I histocompatibility antigen, B-44 alpha chain precursor (MHC class I antigen B*44) (Bw-44)                                                                  | 1B44_HUMAN      | 40463 | 100% | 3 | 3 | 3 | 0.03% | 12.70% |
| XTC1-p29 | (P30481) HLA class I histocompatibility antigen, B-44 alpha chain precursor (MHC class I antigen B*44) (Bw-44)                                                                  | 1B44_HUMAN      | 40463 | 100% | 3 | 3 | 6 | 0.05% | 11.60% |
| XTC1-p29 | (P30481) HLA class I histocompatibility antigen, B-44 alpha chain precursor (MHC class I antigen B*44) (Bw-44)                                                                  | 1B44_HUMAN      | 40463 | 100% | 2 | 2 | 2 | 0.02% | 7.18%  |
| XTC1-p29 | (P30481) HLA class I histocompatibility antigen, B-44 alpha chain precursor (MHC class I antigen B*44) (Bw-44)                                                                  | 1B44_HUMAN      | 40463 | 100% | 2 | 2 | 5 | 0.04% | 13.30% |
| XTC1-p29 | (P30533) Alpha-2-macroglobulin receptor-associated protein precursor (Alpha-2-MRAP) (Low density lipoprotein receptor-related protein-associated protein 1) (RAP)               | AMRP_HUMAN      | 41450 | 100% | 2 | 2 | 2 | 0.02% | 8.12%  |
| XTC1-p29 | (P30533) Alpha-2-macroglobulin receptor-associated protein precursor (Alpha-2-MRAP) (Low density lipoprotein receptor-related protein-associated protein 1) (RAP)               | AMRP_HUMAN      | 41450 | 100% | 2 | 2 | 2 | 0.02% | 8.12%  |

## Protein Identified Sequence Coverage in XTC-1

|          |                                                                                                                                                                                                                    |             |       |      |   |   |    |       |        |
|----------|--------------------------------------------------------------------------------------------------------------------------------------------------------------------------------------------------------------------|-------------|-------|------|---|---|----|-------|--------|
| XTC1-p29 | (P30740) Leukocyte elastase inhibitor (LEI) (Serpine B1) (Monocyte/neutrophil elastase inhibitor) (M/NEI) (EI)                                                                                                     | ILEU_HUMAN  | 42726 | 100% | 3 | 4 | 4  | 0.03% | 21.60% |
| XTC1-p29 | (P31431) Syndecan-4 precursor (SYND4) (Amphiglycan) (Ryudocan core protein)                                                                                                                                        | SDC4_HUMAN  | 21624 | 100% | 2 | 2 | 3  | 0.03% | 12.10% |
| XTC1-p29 | (P32119) Peroxiredoxin-2 (EC 1.11.1.15) (Thioredoxin peroxidase 1) (Thioredoxin-dependent peroxide reductase 1) (Thiol-specific antioxidant protein) (TSA) (PRP) (Natural killer cell-enhancing factor B) (NKEF-B) | PRDX2_HUMAN | 21743 | 100% | 3 | 4 | 7  | 0.06% | 14.70% |
| XTC1-p29 | (P32119) Peroxiredoxin-2 (EC 1.11.1.15) (Thioredoxin peroxidase 1) (Thioredoxin-dependent peroxide reductase 1) (Thiol-specific antioxidant protein) (TSA) (PRP) (Natural killer cell-enhancing factor B) (NKEF-B) | PRDX2_HUMAN | 21743 | 100% | 3 | 4 | 8  | 0.07% | 14.70% |
| XTC1-p29 | (P32119) Peroxiredoxin-2 (EC 1.11.1.15) (Thioredoxin peroxidase 1) (Thioredoxin-dependent peroxide reductase 1) (Thiol-specific antioxidant protein) (TSA) (PRP) (Natural killer cell-enhancing factor B) (NKEF-B) | PRDX2_HUMAN | 21743 | 100% | 2 | 3 | 8  | 0.07% | 9.14%  |
| XTC1-p29 | (P32119) Peroxiredoxin-2 (EC 1.11.1.15) (Thioredoxin peroxidase 1) (Thioredoxin-dependent peroxide reductase 1) (Thiol-specific antioxidant protein) (TSA) (PRP) (Natural killer cell-enhancing factor B) (NKEF-B) | PRDX2_HUMAN | 21743 | 100% | 3 | 4 | 9  | 0.08% | 14.20% |
| XTC1-p29 | (P32119) Peroxiredoxin-2 (EC 1.11.1.15) (Thioredoxin peroxidase 1) (Thioredoxin-dependent peroxide reductase 1) (Thiol-specific antioxidant protein) (TSA) (PRP) (Natural killer cell-enhancing factor B) (NKEF-B) | PRDX2_HUMAN | 21743 | 100% | 3 | 4 | 7  | 0.06% | 14.70% |
| XTC1-p29 | (P32119) Peroxiredoxin-2 (EC 1.11.1.15) (Thioredoxin peroxidase 1) (Thioredoxin-dependent peroxide reductase 1) (Thiol-specific antioxidant protein) (TSA) (PRP) (Natural killer cell-enhancing factor B) (NKEF-B) | PRDX2_HUMAN | 21743 | 100% | 2 | 3 | 8  | 0.07% | 21.80% |
| XTC1-p29 | (P32970) Tumor necrosis factor ligand superfamily member 7 (CD27 ligand) (CD27-L) (CD70 antigen)                                                                                                                   | TNFL7_HUMAN | 21100 | 100% | 2 | 2 | 4  | 0.04% | 24.90% |
| XTC1-p29 | (P32970) Tumor necrosis factor ligand superfamily member 7 (CD27 ligand) (CD27-L) (CD70 antigen)                                                                                                                   | TNFL7_HUMAN | 21100 | 100% | 3 | 3 | 5  | 0.05% | 30.60% |
| XTC1-p29 | (P32970) Tumor necrosis factor ligand superfamily member 7 (CD27 ligand) (CD27-L) (CD70 antigen)                                                                                                                   | TNFL7_HUMAN | 21100 | 100% | 2 | 2 | 3  | 0.03% | 15.50% |
| XTC1-p29 | (P32970) Tumor necrosis factor ligand superfamily member 7 (CD27 ligand) (CD27-L) (CD70 antigen)                                                                                                                   | TNFL7_HUMAN | 21100 | 100% | 5 | 7 | 13 | 0.12% | 35.20% |
| XTC1-p29 | (P32970) Tumor necrosis factor ligand superfamily member 7 (CD27 ligand) (CD27-L) (CD70 antigen)                                                                                                                   | TNFL7_HUMAN | 21100 | 100% | 5 | 7 | 13 | 0.12% | 28.00% |
| XTC1-p29 | (P32970) Tumor necrosis factor ligand superfamily member 7 (CD27 ligand) (CD27-L) (CD70 antigen)                                                                                                                   | TNFL7_HUMAN | 21100 | 100% | 2 | 2 | 2  | 0.02% | 13.00% |

## Protein Identified Sequence Coverage in XTC-1

|          |                                                                                                                                                                                                            |             |       |      |   |   |    |       |        |
|----------|------------------------------------------------------------------------------------------------------------------------------------------------------------------------------------------------------------|-------------|-------|------|---|---|----|-------|--------|
| XTC1-p29 | (P32970) Tumor necrosis factor ligand superfamily member 7 (CD27 ligand) (CD27-L) (CD70 antigen)                                                                                                           | TNFL7_HUMAN | 21100 | 100% | 4 | 7 | 14 | 0.13% | 28.00% |
| XTC1-p29 | (P32970) Tumor necrosis factor ligand superfamily member 7 (CD27 ligand) (CD27-L) (CD70 antigen)                                                                                                           | TNFL7_HUMAN | 21100 | 100% | 5 | 8 | 13 | 0.12% | 28.00% |
| XTC1-p29 | (P32970) Tumor necrosis factor ligand superfamily member 7 (CD27 ligand) (CD27-L) (CD70 antigen)                                                                                                           | TNFL7_HUMAN | 21100 | 100% | 2 | 2 | 6  | 0.05% | 13.00% |
| XTC1-p29 | (P32970) Tumor necrosis factor ligand superfamily member 7 (CD27 ligand) (CD27-L) (CD70 antigen)                                                                                                           | TNFL7_HUMAN | 21100 | 100% | 2 | 2 | 3  | 0.03% | 13.00% |
| XTC1-p29 | (P34059) N-acetylgalactosamine-6-sulfatase precursor (EC 3.1.6.4) (N-acetylgalactosamine-6-sulfate sulfatase) (Galactose-6-sulfate sulfatase) (GalNAc6S sulfatase) (Chondroitinsulfatase) (Chondroitinase) | GA6S_HUMAN  | 58009 | 100% | 3 | 3 | 4  | 0.04% | 8.43%  |
| XTC1-p29 | (P34059) N-acetylgalactosamine-6-sulfatase precursor (EC 3.1.6.4) (N-acetylgalactosamine-6-sulfate sulfatase) (Galactose-6-sulfate sulfatase) (GalNAc6S sulfatase) (Chondroitinsulfatase) (Chondroitinase) | GA6S_HUMAN  | 58009 | 100% | 2 | 2 | 2  | 0.02% | 8.43%  |
| XTC1-p29 | (P34059) N-acetylgalactosamine-6-sulfatase precursor (EC 3.1.6.4) (N-acetylgalactosamine-6-sulfate sulfatase) (Galactose-6-sulfate sulfatase) (GalNAc6S sulfatase) (Chondroitinsulfatase) (Chondroitinase) | GA6S_HUMAN  | 58009 | 100% | 2 | 2 | 3  | 0.03% | 8.43%  |
| XTC1-p29 | (P34059) N-acetylgalactosamine-6-sulfatase precursor (EC 3.1.6.4) (N-acetylgalactosamine-6-sulfate sulfatase) (Galactose-6-sulfate sulfatase) (GalNAc6S sulfatase) (Chondroitinsulfatase) (Chondroitinase) | GA6S_HUMAN  | 58009 | 100% | 2 | 2 | 3  | 0.03% | 7.09%  |
| XTC1-p29 | (P34059) N-acetylgalactosamine-6-sulfatase precursor (EC 3.1.6.4) (N-acetylgalactosamine-6-sulfate sulfatase) (Galactose-6-sulfate sulfatase) (GalNAc6S sulfatase) (Chondroitinsulfatase) (Chondroitinase) | GA6S_HUMAN  | 58009 | 100% | 3 | 3 | 5  | 0.05% | 7.66%  |
| XTC1-p29 | (P34059) N-acetylgalactosamine-6-sulfatase precursor (EC 3.1.6.4) (N-acetylgalactosamine-6-sulfate sulfatase) (Galactose-6-sulfate sulfatase) (GalNAc6S sulfatase) (Chondroitinsulfatase) (Chondroitinase) | GA6S_HUMAN  | 58009 | 100% | 4 | 4 | 4  | 0.04% | 13.60% |
| XTC1-p29 | (P34059) N-acetylgalactosamine-6-sulfatase precursor (EC 3.1.6.4) (N-acetylgalactosamine-6-sulfate sulfatase) (Galactose-6-sulfate sulfatase) (GalNAc6S sulfatase) (Chondroitinsulfatase) (Chondroitinase) | GA6S_HUMAN  | 58009 | 100% | 2 | 2 | 4  | 0.04% | 7.85%  |
| XTC1-p29 | (P34059) N-acetylgalactosamine-6-sulfatase precursor (EC 3.1.6.4) (N-acetylgalactosamine-6-sulfate sulfatase) (Galactose-6-sulfate sulfatase) (GalNAc6S sulfatase) (Chondroitinsulfatase) (Chondroitinase) | GA6S_HUMAN  | 58009 | 100% | 2 | 2 | 3  | 0.03% | 11.50% |

## Protein Identified Sequence Coverage in XTC-1

|          |                                                                                                                                                                                                                                                    |            |        |      |   |   |   |       |        |
|----------|----------------------------------------------------------------------------------------------------------------------------------------------------------------------------------------------------------------------------------------------------|------------|--------|------|---|---|---|-------|--------|
| XTC1-p29 | (P34059) N-acetylgalactosamine-6-sulfatase precursor (EC 3.1.6.4) (N-acetylgalactosamine-6-sulfate sulfatase) (Galactose-6-sulfate sulfatase) (GalNAc6S sulfatase) (Chondroitinsulfatase) (Chondroitinase)                                         | GA6S_HUMAN | 58009  | 100% | 3 | 4 | 5 | 0.04% | 10.50% |
| XTC1-p29 | (P34059) N-acetylgalactosamine-6-sulfatase precursor (EC 3.1.6.4) (N-acetylgalactosamine-6-sulfate sulfatase) (Galactose-6-sulfate sulfatase) (GalNAc6S sulfatase) (Chondroitinsulfatase) (Chondroitinase)                                         | GA6S_HUMAN | 58009  | 100% | 2 | 3 | 5 | 0.04% | 8.81%  |
| XTC1-p29 | (P35052) Glypican-1 precursor                                                                                                                                                                                                                      | GPC1_HUMAN | 61633  | 100% | 2 | 3 | 4 | 0.04% | 6.27%  |
| XTC1-p29 | (P35052) Glypican-1 precursor                                                                                                                                                                                                                      | GPC1_HUMAN | 61633  | 100% | 3 | 3 | 4 | 0.04% | 9.86%  |
| XTC1-p29 | (P35052) Glypican-1 precursor                                                                                                                                                                                                                      | GPC1_HUMAN | 61633  | 100% | 6 | 6 | 9 | 0.08% | 15.90% |
| XTC1-p29 | (P35052) Glypican-1 precursor                                                                                                                                                                                                                      | GPC1_HUMAN | 61633  | 100% | 2 | 2 | 2 | 0.02% | 5.91%  |
| XTC1-p29 | (P35052) Glypican-1 precursor                                                                                                                                                                                                                      | GPC1_HUMAN | 61633  | 100% | 6 | 6 | 7 | 0.06% | 18.30% |
| XTC1-p29 | (P35052) Glypican-1 precursor                                                                                                                                                                                                                      | GPC1_HUMAN | 61633  | 100% | 5 | 5 | 7 | 0.06% | 11.60% |
| XTC1-p29 | (P35052) Glypican-1 precursor                                                                                                                                                                                                                      | GPC1_HUMAN | 61633  | 100% | 2 | 2 | 2 | 0.02% | 4.48%  |
| XTC1-p29 | (P35052) Glypican-1 precursor                                                                                                                                                                                                                      | GPC1_HUMAN | 61633  | 100% | 3 | 4 | 7 | 0.06% | 7.89%  |
| XTC1-p29 | (P35052) Glypican-1 precursor                                                                                                                                                                                                                      | GPC1_HUMAN | 61633  | 100% | 2 | 2 | 5 | 0.04% | 8.96%  |
| XTC1-p29 | (P35052) Glypican-1 precursor                                                                                                                                                                                                                      | GPC1_HUMAN | 61633  | 100% | 2 | 2 | 3 | 0.03% | 8.78%  |
| XTC1-p29 | (P35579) Myosin-9 (Myosin heavy chain, nonmuscle IIa) (Nonmuscle myosin heavy chain IIa) (NMMHC IIa) (NMMHC-IIA) (Cellular myosin heavy chain, type A) (Nonmuscle myosin heavy chain-A) (NMMHC-A)                                                  | MYH9_HUMAN | 226388 | 100% | 2 | 2 | 2 | 0.02% | 2.19%  |
| XTC1-p29 | (P35613) Basigin precursor (Leukocyte activation antigen M6) (Collagenase stimulatory factor) (Extracellular matrix metalloproteinase inducer) (EMMPRIN) (5F7) (Tumor cell-derived collagenase stimulatory factor) (TCSF) (OK blood group antigen) | BASI_HUMAN | 42182  | 100% | 3 | 4 | 8 | 0.08% | 13.50% |
| XTC1-p29 | (P35613) Basigin precursor (Leukocyte activation antigen M6) (Collagenase stimulatory factor) (Extracellular matrix metalloproteinase inducer) (EMMPRIN) (5F7) (Tumor cell-derived collagenase stimulatory factor) (TCSF) (OK blood group antigen) | BASI_HUMAN | 42182  | 100% | 2 | 4 | 8 | 0.08% | 8.83%  |
| XTC1-p29 | (P35613) Basigin precursor (Leukocyte activation antigen M6) (Collagenase stimulatory factor) (Extracellular matrix metalloproteinase inducer) (EMMPRIN) (5F7) (Tumor cell-derived collagenase stimulatory factor) (TCSF) (OK blood group antigen) | BASI_HUMAN | 42182  | 100% | 2 | 4 | 9 | 0.08% | 8.83%  |
| XTC1-p29 | (P35613) Basigin precursor (Leukocyte activation antigen M6) (Collagenase stimulatory factor) (Extracellular matrix metalloproteinase inducer) (EMMPRIN) (5F7) (Tumor cell-derived collagenase stimulatory factor) (TCSF) (OK blood group antigen) | BASI_HUMAN | 42182  | 100% | 2 | 4 | 8 | 0.07% | 8.83%  |
| XTC1-p29 | (P35613) Basigin precursor (Leukocyte activation antigen M6) (Collagenase stimulatory factor) (Extracellular matrix metalloproteinase inducer) (EMMPRIN) (5F7) (Tumor cell-derived collagenase stimulatory factor) (TCSF) (OK blood group antigen) | BASI_HUMAN | 42182  | 100% | 5 | 5 | 8 | 0.07% | 22.60% |

Protein Identified Sequence Coverage in XTC-1

|          |                                                                                                                                                                                                                                                    |             |        |      |   |   |    |       |        |
|----------|----------------------------------------------------------------------------------------------------------------------------------------------------------------------------------------------------------------------------------------------------|-------------|--------|------|---|---|----|-------|--------|
| XTC1-p29 | (P35613) Basigin precursor (Leukocyte activation antigen M6) (Collagenase stimulatory factor) (Extracellular matrix metalloproteinase inducer) (EMMPRIN) (5F7) (Tumor cell-derived collagenase stimulatory factor) (TCSF) (OK blood group antigen) | BASI_HUMAN  | 42182  | 100% | 6 | 7 | 12 | 0.11% | 26.80% |
| XTC1-p29 | (P35613) Basigin precursor (Leukocyte activation antigen M6) (Collagenase stimulatory factor) (Extracellular matrix metalloproteinase inducer) (EMMPRIN) (5F7) (Tumor cell-derived collagenase stimulatory factor) (TCSF) (OK blood group antigen) | BASI_HUMAN  | 42182  | 100% | 3 | 3 | 4  | 0.04% | 16.40% |
| XTC1-p29 | (P35613) Basigin precursor (Leukocyte activation antigen M6) (Collagenase stimulatory factor) (Extracellular matrix metalloproteinase inducer) (EMMPRIN) (5F7) (Tumor cell-derived collagenase stimulatory factor) (TCSF) (OK blood group antigen) | BASI_HUMAN  | 42182  | 100% | 6 | 9 | 11 | 0.10% | 25.50% |
| XTC1-p29 | (P35613) Basigin precursor (Leukocyte activation antigen M6) (Collagenase stimulatory factor) (Extracellular matrix metalloproteinase inducer) (EMMPRIN) (5F7) (Tumor cell-derived collagenase stimulatory factor) (TCSF) (OK blood group antigen) | BASI_HUMAN  | 42182  | 100% | 6 | 7 | 11 | 0.10% | 21.00% |
| XTC1-p29 | (P35613) Basigin precursor (Leukocyte activation antigen M6) (Collagenase stimulatory factor) (Extracellular matrix metalloproteinase inducer) (EMMPRIN) (5F7) (Tumor cell-derived collagenase stimulatory factor) (TCSF) (OK blood group antigen) | BASI_HUMAN  | 42182  | 100% | 2 | 2 | 4  | 0.03% | 4.94%  |
| XTC1-p29 | (P35637) RNA-binding protein FUS (Oncogene FUS) (Oncogene TLS) (Translocated in liposarcoma protein) (POMp75) (75 kDa DNA-pairing protein)                                                                                                         | FUS_HUMAN   | 53408  | 100% | 2 | 2 | 3  | 0.03% | 6.46%  |
| XTC1-p29 | (P35658) Nuclear pore complex protein Nup214 (Nucleoporin Nup214) (214 kDa nucleoporin) (CAN protein)                                                                                                                                              | NU214_HUMAN | 213748 | 100% | 2 | 2 | 3  | 0.03% | 1.91%  |
| XTC1-p29 | (P35658) Nuclear pore complex protein Nup214 (Nucleoporin Nup214) (214 kDa nucleoporin) (CAN protein)                                                                                                                                              | NU214_HUMAN | 213748 | 100% | 2 | 3 | 3  | 0.03% | 1.91%  |
| XTC1-p29 | (P37802) Transgelin-2 (SM22-alpha homolog)                                                                                                                                                                                                         | TAGL2_HUMAN | 22243  | 100% | 3 | 3 | 4  | 0.04% | 24.20% |
| XTC1-p29 | (P37802) Transgelin-2 (SM22-alpha homolog)                                                                                                                                                                                                         | TAGL2_HUMAN | 22243  | 100% | 4 | 5 | 9  | 0.08% | 33.30% |
| XTC1-p29 | (P37802) Transgelin-2 (SM22-alpha homolog)                                                                                                                                                                                                         | TAGL2_HUMAN | 22243  | 100% | 5 | 5 | 8  | 0.07% | 40.40% |
| XTC1-p29 | (P37802) Transgelin-2 (SM22-alpha homolog)                                                                                                                                                                                                         | TAGL2_HUMAN | 22243  | 100% | 5 | 5 | 10 | 0.09% | 38.90% |
| XTC1-p29 | (P37802) Transgelin-2 (SM22-alpha homolog)                                                                                                                                                                                                         | TAGL2_HUMAN | 22243  | 100% | 6 | 6 | 10 | 0.09% | 42.40% |
| XTC1-p29 | (P37802) Transgelin-2 (SM22-alpha homolog)                                                                                                                                                                                                         | TAGL2_HUMAN | 22243  | 100% | 5 | 5 | 9  | 0.08% | 34.80% |
| XTC1-p29 | (P37802) Transgelin-2 (SM22-alpha homolog)                                                                                                                                                                                                         | TAGL2_HUMAN | 22243  | 100% | 3 | 3 | 6  | 0.05% | 26.30% |
| XTC1-p29 | (P37837) Transaldolase (EC 2.2.1.2)                                                                                                                                                                                                                | TALDO_HUMAN | 37524  | 100% | 4 | 4 | 6  | 0.06% | 13.10% |
| XTC1-p29 | (P37837) Transaldolase (EC 2.2.1.2)                                                                                                                                                                                                                | TALDO_HUMAN | 37524  | 100% | 2 | 2 | 2  | 0.02% | 7.12%  |
| XTC1-p29 | (P37837) Transaldolase (EC 2.2.1.2)                                                                                                                                                                                                                | TALDO_HUMAN | 37524  | 100% | 5 | 5 | 7  | 0.06% | 15.70% |
| XTC1-p29 | (P37837) Transaldolase (EC 2.2.1.2)                                                                                                                                                                                                                | TALDO_HUMAN | 37524  | 100% | 6 | 6 | 8  | 0.07% | 17.20% |
| XTC1-p29 | (P37837) Transaldolase (EC 2.2.1.2)                                                                                                                                                                                                                | TALDO_HUMAN | 37524  | 100% | 3 | 3 | 4  | 0.03% | 9.20%  |



## Protein Identified Sequence Coverage in XTC-1

|          |                                                                                                                                                                                                                                                |             |        |      |   |   |   |       |        |
|----------|------------------------------------------------------------------------------------------------------------------------------------------------------------------------------------------------------------------------------------------------|-------------|--------|------|---|---|---|-------|--------|
| XTC1-p29 | (P38646) Stress-70 protein, mitochondrial precursor (75 kDa glucose-regulated protein) (GRP 75) (Peptide-binding protein 74) (PBP74) (Mortalin) (MOT)                                                                                          | GRP75_HUMAN | 73663  | 100% | 2 | 2 | 2 | 0.02% | 6.33%  |
| XTC1-p29 | (P39019) 40S ribosomal protein S19                                                                                                                                                                                                             | RS19_HUMAN  | 15911  | 100% | 2 | 2 | 2 | 0.02% | 15.30% |
| XTC1-p29 | (P39019) 40S ribosomal protein S19                                                                                                                                                                                                             | RS19_HUMAN  | 15911  | 100% | 2 | 2 | 3 | 0.03% | 15.30% |
| XTC1-p29 | (P39060) Collagen alpha-1(XVIII) chain precursor [Contains: Endostatin]                                                                                                                                                                        | COIA1_HUMAN | 153809 | 100% | 2 | 2 | 3 | 0.03% | 3.17%  |
| XTC1-p29 | (P39060) Collagen alpha-1(XVIII) chain precursor [Contains: Endostatin]                                                                                                                                                                        | COIA1_HUMAN | 153809 | 100% | 2 | 2 | 2 | 0.02% | 4.02%  |
| XTC1-p29 | (P41222) Prostaglandin-H2 D-isomerase precursor (EC 5.3.99.2) (Lipocalin-type prostaglandin-D synthase) (Glutathione-independent PGD synthetase) (Prostaglandin-D2 synthase) (PGD2 synthase) (PGDS2) (PGDS) (Beta-trace protein) (Cerebrin-28) | PTGDS_HUMAN | 21011  | 100% | 2 | 2 | 2 | 0.02% | 17.40% |
| XTC1-p29 | (P41222) Prostaglandin-H2 D-isomerase precursor (EC 5.3.99.2) (Lipocalin-type prostaglandin-D synthase) (Glutathione-independent PGD synthetase) (Prostaglandin-D2 synthase) (PGD2 synthase) (PGDS2) (PGDS) (Beta-trace protein) (Cerebrin-28) | PTGDS_HUMAN | 21011  | 100% | 2 | 2 | 3 | 0.03% | 17.40% |
| XTC1-p29 | (P41222) Prostaglandin-H2 D-isomerase precursor (EC 5.3.99.2) (Lipocalin-type prostaglandin-D synthase) (Glutathione-independent PGD synthetase) (Prostaglandin-D2 synthase) (PGD2 synthase) (PGDS2) (PGDS) (Beta-trace protein) (Cerebrin-28) | PTGDS_HUMAN | 21011  | 100% | 2 | 2 | 2 | 0.02% | 17.40% |
| XTC1-p29 | (P41222) Prostaglandin-H2 D-isomerase precursor (EC 5.3.99.2) (Lipocalin-type prostaglandin-D synthase) (Glutathione-independent PGD synthetase) (Prostaglandin-D2 synthase) (PGD2 synthase) (PGDS2) (PGDS) (Beta-trace protein) (Cerebrin-28) | PTGDS_HUMAN | 21011  | 100% | 2 | 2 | 2 | 0.02% | 17.40% |
| XTC1-p29 | (P41222) Prostaglandin-H2 D-isomerase precursor (EC 5.3.99.2) (Lipocalin-type prostaglandin-D synthase) (Glutathione-independent PGD synthetase) (Prostaglandin-D2 synthase) (PGD2 synthase) (PGDS2) (PGDS) (Beta-trace protein) (Cerebrin-28) | PTGDS_HUMAN | 21011  | 100% | 2 | 2 | 4 | 0.04% | 17.40% |
| XTC1-p29 | (P41222) Prostaglandin-H2 D-isomerase precursor (EC 5.3.99.2) (Lipocalin-type prostaglandin-D synthase) (Glutathione-independent PGD synthetase) (Prostaglandin-D2 synthase) (PGD2 synthase) (PGDS2) (PGDS) (Beta-trace protein) (Cerebrin-28) | PTGDS_HUMAN | 21011  | 100% | 2 | 2 | 2 | 0.02% | 17.40% |
| XTC1-p29 | (P42785) Lysosomal Pro-X carboxypeptidase precursor (EC 3.4.16.2) (Prolylcarboxypeptidase) (PRCP) (Proline carboxypeptidase) (Angiotensinase C) (Lysosomal carboxypeptidase C)                                                                 | PCP_HUMAN   | 55783  | 100% | 2 | 2 | 3 | 0.03% | 6.65%  |

## Protein Identified Sequence Coverage in XTC-1

|          |                                                                                                                                                                                                                                                    |             |       |      |   |   |    |       |        |
|----------|----------------------------------------------------------------------------------------------------------------------------------------------------------------------------------------------------------------------------------------------------|-------------|-------|------|---|---|----|-------|--------|
| XTC1-p29 | (P42785) Lysosomal Pro-X carboxypeptidase precursor (EC 3.4.16.2) (Prolylcarboxypeptidase) (PRCP) (Proline carboxypeptidase) (Angiotensinase C) (Lysosomal carboxypeptidase C)                                                                     | PCP_HUMAN   | 55783 | 100% | 2 | 2 | 3  | 0.03% | 8.06%  |
| XTC1-p29 | (P43121) Cell surface glycoprotein MUC18 precursor (Melanoma-associated antigen MUC18) (Melanoma cell adhesion molecule) (Melanoma-associated antigen A32) (S-endo 1 endothelial-associated antigen) (Cell surface glycoprotein P1H12) (CD146 anti | MUC18_HUMAN | 71589 | 100% | 5 | 5 | 7  | 0.06% | 12.50% |
| XTC1-p29 | (P43121) Cell surface glycoprotein MUC18 precursor (Melanoma-associated antigen MUC18) (Melanoma cell adhesion molecule) (Melanoma-associated antigen A32) (S-endo 1 endothelial-associated antigen) (Cell surface glycoprotein P1H12) (CD146 anti | MUC18_HUMAN | 71589 | 100% | 4 | 4 | 5  | 0.05% | 11.10% |
| XTC1-p29 | (P43121) Cell surface glycoprotein MUC18 precursor (Melanoma-associated antigen MUC18) (Melanoma cell adhesion molecule) (Melanoma-associated antigen A32) (S-endo 1 endothelial-associated antigen) (Cell surface glycoprotein P1H12) (CD146 anti | MUC18_HUMAN | 71589 | 100% | 5 | 5 | 6  | 0.05% | 11.80% |
| XTC1-p29 | (P43121) Cell surface glycoprotein MUC18 precursor (Melanoma-associated antigen MUC18) (Melanoma cell adhesion molecule) (Melanoma-associated antigen A32) (S-endo 1 endothelial-associated antigen) (Cell surface glycoprotein P1H12) (CD146 anti | MUC18_HUMAN | 71589 | 100% | 5 | 5 | 8  | 0.07% | 10.50% |
| XTC1-p29 | (P43121) Cell surface glycoprotein MUC18 precursor (Melanoma-associated antigen MUC18) (Melanoma cell adhesion molecule) (Melanoma-associated antigen A32) (S-endo 1 endothelial-associated antigen) (Cell surface glycoprotein P1H12) (CD146 anti | MUC18_HUMAN | 71589 | 100% | 2 | 2 | 3  | 0.03% | 7.59%  |
| XTC1-p29 | (P43121) Cell surface glycoprotein MUC18 precursor (Melanoma-associated antigen MUC18) (Melanoma cell adhesion molecule) (Melanoma-associated antigen A32) (S-endo 1 endothelial-associated antigen) (Cell surface glycoprotein P1H12) (CD146 anti | MUC18_HUMAN | 71589 | 100% | 4 | 4 | 4  | 0.03% | 10.50% |
| XTC1-p29 | (P43121) Cell surface glycoprotein MUC18 precursor (Melanoma-associated antigen MUC18) (Melanoma cell adhesion molecule) (Melanoma-associated antigen A32) (S-endo 1 endothelial-associated antigen) (Cell surface glycoprotein P1H12) (CD146 anti | MUC18_HUMAN | 71589 | 100% | 3 | 4 | 12 | 0.10% | 9.44%  |
| XTC1-p29 | (P43121) Cell surface glycoprotein MUC18 precursor (Melanoma-associated antigen MUC18) (Melanoma cell adhesion molecule) (Melanoma-associated antigen A32) (S-endo 1 endothelial-associated antigen) (Cell surface glycoprotein P1H12) (CD146 anti | MUC18_HUMAN | 71589 | 100% | 3 | 3 | 4  | 0.04% | 12.70% |

Protein Identified Sequence Coverage in XTC-1

|          |                                                                                                                                                                   |             |       |      |    |    |    |       |        |
|----------|-------------------------------------------------------------------------------------------------------------------------------------------------------------------|-------------|-------|------|----|----|----|-------|--------|
| XTC1-p29 | (P43307) Translocon-associated protein alpha subunit precursor (TRAP-alpha) (Signal sequence receptor alpha subunit) (SSR-alpha)                                  | SSRA_HUMAN  | 32218 | 100% | 2  | 2  | 2  | 0.02% | 8.04%  |
| XTC1-p29 | (P43490) Nicotinamide phosphoribosyltransferase (EC 2.4.2.12) (NAmPRTase) (Nampt) (Pre-B cell-enhancing factor) (Pre-B-cell colony-enhancing factor 1) (Visfatin) | NAMPT_HUMAN | 55505 | 100% | 7  | 8  | 14 | 0.13% | 27.50% |
| XTC1-p29 | (P43490) Nicotinamide phosphoribosyltransferase (EC 2.4.2.12) (NAmPRTase) (Nampt) (Pre-B cell-enhancing factor) (Pre-B-cell colony-enhancing factor 1) (Visfatin) | NAMPT_HUMAN | 55505 | 100% | 10 | 12 | 21 | 0.19% | 40.50% |
| XTC1-p29 | (P43490) Nicotinamide phosphoribosyltransferase (EC 2.4.2.12) (NAmPRTase) (Nampt) (Pre-B cell-enhancing factor) (Pre-B-cell colony-enhancing factor 1) (Visfatin) | NAMPT_HUMAN | 55505 | 100% | 5  | 6  | 10 | 0.09% | 21.00% |
| XTC1-p29 | (P43490) Nicotinamide phosphoribosyltransferase (EC 2.4.2.12) (NAmPRTase) (Nampt) (Pre-B cell-enhancing factor) (Pre-B-cell colony-enhancing factor 1) (Visfatin) | NAMPT_HUMAN | 55505 | 100% | 10 | 12 | 17 | 0.15% | 33.80% |
| XTC1-p29 | (P43490) Nicotinamide phosphoribosyltransferase (EC 2.4.2.12) (NAmPRTase) (Nampt) (Pre-B cell-enhancing factor) (Pre-B-cell colony-enhancing factor 1) (Visfatin) | NAMPT_HUMAN | 55505 | 100% | 8  | 8  | 14 | 0.12% | 23.40% |
| XTC1-p29 | (P43490) Nicotinamide phosphoribosyltransferase (EC 2.4.2.12) (NAmPRTase) (Nampt) (Pre-B cell-enhancing factor) (Pre-B-cell colony-enhancing factor 1) (Visfatin) | NAMPT_HUMAN | 55505 | 100% | 2  | 2  | 4  | 0.04% | 8.35%  |
| XTC1-p29 | (P43490) Nicotinamide phosphoribosyltransferase (EC 2.4.2.12) (NAmPRTase) (Nampt) (Pre-B cell-enhancing factor) (Pre-B-cell colony-enhancing factor 1) (Visfatin) | NAMPT_HUMAN | 55505 | 100% | 2  | 2  | 7  | 0.06% | 7.13%  |
| XTC1-p29 | (P43490) Nicotinamide phosphoribosyltransferase (EC 2.4.2.12) (NAmPRTase) (Nampt) (Pre-B cell-enhancing factor) (Pre-B-cell colony-enhancing factor 1) (Visfatin) | NAMPT_HUMAN | 55505 | 100% | 4  | 6  | 7  | 0.06% | 11.20% |
| XTC1-p29 | (P43490) Nicotinamide phosphoribosyltransferase (EC 2.4.2.12) (NAmPRTase) (Nampt) (Pre-B cell-enhancing factor) (Pre-B-cell colony-enhancing factor 1) (Visfatin) | NAMPT_HUMAN | 55505 | 100% | 3  | 3  | 4  | 0.04% | 12.60% |
| XTC1-p29 | (P43490) Nicotinamide phosphoribosyltransferase (EC 2.4.2.12) (NAmPRTase) (Nampt) (Pre-B cell-enhancing factor) (Pre-B-cell colony-enhancing factor 1) (Visfatin) | NAMPT_HUMAN | 55505 | 100% | 6  | 9  | 14 | 0.12% | 26.10% |

## Protein Identified Sequence Coverage in XTC-1

|          |                                                                                                                               |             |       |      |   |    |    |       |        |
|----------|-------------------------------------------------------------------------------------------------------------------------------|-------------|-------|------|---|----|----|-------|--------|
| XTC1-p29 | (P45880) Voltage-dependent anion-selective channel protein 2 (VDAC-2) (hVDAC2) (Outer mitochondrial membrane protein porin 2) | VDAC2_HUMAN | 38076 | 100% | 2 | 2  | 2  | 0.02% | 14.40% |
| XTC1-p29 | (P46778) 60S ribosomal protein L21                                                                                            | RL21_HUMAN  | 18416 | 100% | 2 | 3  | 6  | 0.06% | 16.40% |
| XTC1-p29 | (P46778) 60S ribosomal protein L21                                                                                            | RL21_HUMAN  | 18416 | 100% | 2 | 3  | 6  | 0.06% | 16.40% |
| XTC1-p29 | (P46778) 60S ribosomal protein L21                                                                                            | RL21_HUMAN  | 18416 | 100% | 2 | 2  | 3  | 0.03% | 16.40% |
| XTC1-p29 | (P46778) 60S ribosomal protein L21                                                                                            | RL21_HUMAN  | 18416 | 100% | 2 | 3  | 6  | 0.05% | 16.40% |
| XTC1-p29 | (P48307) Tissue factor pathway inhibitor 2 precursor (TFPI-2) (Placental protein 5) (PP5)                                     | TFPI2_HUMAN | 26917 | 100% | 3 | 3  | 3  | 0.03% | 14.00% |
| XTC1-p29 | (P48307) Tissue factor pathway inhibitor 2 precursor (TFPI-2) (Placental protein 5) (PP5)                                     | TFPI2_HUMAN | 26917 | 100% | 2 | 2  | 2  | 0.02% | 9.79%  |
| XTC1-p29 | (P48307) Tissue factor pathway inhibitor 2 precursor (TFPI-2) (Placental protein 5) (PP5)                                     | TFPI2_HUMAN | 26917 | 100% | 3 | 3  | 6  | 0.05% | 14.00% |
| XTC1-p29 | (P48307) Tissue factor pathway inhibitor 2 precursor (TFPI-2) (Placental protein 5) (PP5)                                     | TFPI2_HUMAN | 26917 | 100% | 2 | 2  | 4  | 0.04% | 16.20% |
| XTC1-p29 | (P48307) Tissue factor pathway inhibitor 2 precursor (TFPI-2) (Placental protein 5) (PP5)                                     | TFPI2_HUMAN | 26917 | 100% | 2 | 2  | 2  | 0.02% | 16.20% |
| XTC1-p29 | (P48643) T-complex protein 1 subunit epsilon (TCP-1-epsilon) (CCT-epsilon)                                                    | TCPE_HUMAN  | 59654 | 100% | 2 | 2  | 2  | 0.02% | 9.24%  |
| XTC1-p29 | (P48643) T-complex protein 1 subunit epsilon (TCP-1-epsilon) (CCT-epsilon)                                                    | TCPE_HUMAN  | 59654 | 100% | 2 | 2  | 3  | 0.03% | 11.10% |
| XTC1-p29 | (P49366) Deoxyhypusine synthase (EC 2.5.1.46) (DHS)                                                                           | DHYS_HUMAN  | 40953 | 100% | 2 | 2  | 2  | 0.02% | 8.67%  |
| XTC1-p29 | (P50454) Collagen-binding protein 2 precursor (Colligin 2) (Rheumatoid arthritis-related antigen RA-A47) (SerpH2)             | SPH2_HUMAN  | 46424 | 100% | 2 | 2  | 3  | 0.03% | 8.37%  |
| XTC1-p29 | (P50454) Collagen-binding protein 2 precursor (Colligin 2) (Rheumatoid arthritis-related antigen RA-A47) (SerpH2)             | SPH2_HUMAN  | 46424 | 100% | 6 | 8  | 13 | 0.12% | 21.30% |
| XTC1-p29 | (P50454) Collagen-binding protein 2 precursor (Colligin 2) (Rheumatoid arthritis-related antigen RA-A47) (SerpH2)             | SPH2_HUMAN  | 46424 | 100% | 7 | 8  | 12 | 0.11% | 23.70% |
| XTC1-p29 | (P50454) Collagen-binding protein 2 precursor (Colligin 2) (Rheumatoid arthritis-related antigen RA-A47) (SerpH2)             | SPH2_HUMAN  | 46424 | 100% | 4 | 5  | 9  | 0.08% | 18.40% |
| XTC1-p29 | (P50454) Collagen-binding protein 2 precursor (Colligin 2) (Rheumatoid arthritis-related antigen RA-A47) (SerpH2)             | SPH2_HUMAN  | 46424 | 100% | 9 | 11 | 15 | 0.13% | 29.40% |
| XTC1-p29 | (P50454) Collagen-binding protein 2 precursor (Colligin 2) (Rheumatoid arthritis-related antigen RA-A47) (SerpH2)             | SPH2_HUMAN  | 46424 | 100% | 7 | 7  | 12 | 0.11% | 23.20% |
| XTC1-p29 | (P50454) Collagen-binding protein 2 precursor (Colligin 2) (Rheumatoid arthritis-related antigen RA-A47) (SerpH2)             | SPH2_HUMAN  | 46424 | 100% | 4 | 5  | 10 | 0.09% | 15.30% |
| XTC1-p29 | (P50454) Collagen-binding protein 2 precursor (Colligin 2) (Rheumatoid arthritis-related antigen RA-A47) (SerpH2)             | SPH2_HUMAN  | 46424 | 100% | 2 | 3  | 5  | 0.04% | 9.81%  |
| XTC1-p29 | (P50454) Collagen-binding protein 2 precursor (Colligin 2) (Rheumatoid arthritis-related antigen RA-A47) (SerpH2)             | SPH2_HUMAN  | 46424 | 100% | 2 | 2  | 3  | 0.03% | 12.20% |
| XTC1-p29 | (P50895) Lutheran blood group glycoprotein precursor (B-CAM cell surface glycoprotein) (Auberger B antigen) (F8/G253 antigen) | LU_HUMAN    | 67386 | 100% | 2 | 2  | 2  | 0.02% | 6.37%  |

## Protein Identified Sequence Coverage in XTC-1

|          |                                                                                                                                                                                                                                                   |             |        |      |   |   |   |       |        |
|----------|---------------------------------------------------------------------------------------------------------------------------------------------------------------------------------------------------------------------------------------------------|-------------|--------|------|---|---|---|-------|--------|
| XTC1-p29 | (P50895) Lutheran blood group glycoprotein precursor (B-CAM cell surface glycoprotein) (Auberger B antigen) (F8/G253 antigen)                                                                                                                     | LU_HUMAN    | 67386  | 100% | 2 | 2 | 3 | 0.03% | 6.37%  |
| XTC1-p29 | (P50895) Lutheran blood group glycoprotein precursor (B-CAM cell surface glycoprotein) (Auberger B antigen) (F8/G253 antigen)                                                                                                                     | LU_HUMAN    | 67386  | 100% | 3 | 3 | 3 | 0.03% | 7.17%  |
| XTC1-p29 | (P50897) Palmitoyl-protein thioesterase 1 precursor (EC 3.1.2.22) (Palmitoyl-protein hydrolase 1)                                                                                                                                                 | PPT1_HUMAN  | 34176  | 100% | 3 | 4 | 6 | 0.06% | 16.00% |
| XTC1-p29 | (P50897) Palmitoyl-protein thioesterase 1 precursor (EC 3.1.2.22) (Palmitoyl-protein hydrolase 1)                                                                                                                                                 | PPT1_HUMAN  | 34176  | 100% | 2 | 2 | 3 | 0.03% | 16.00% |
| XTC1-p29 | (P50897) Palmitoyl-protein thioesterase 1 precursor (EC 3.1.2.22) (Palmitoyl-protein hydrolase 1)                                                                                                                                                 | PPT1_HUMAN  | 34176  | 100% | 3 | 3 | 4 | 0.04% | 16.30% |
| XTC1-p29 | (P50897) Palmitoyl-protein thioesterase 1 precursor (EC 3.1.2.22) (Palmitoyl-protein hydrolase 1)                                                                                                                                                 | PPT1_HUMAN  | 34176  | 100% | 4 | 5 | 7 | 0.06% | 22.90% |
| XTC1-p29 | (P50897) Palmitoyl-protein thioesterase 1 precursor (EC 3.1.2.22) (Palmitoyl-protein hydrolase 1)                                                                                                                                                 | PPT1_HUMAN  | 34176  | 100% | 3 | 3 | 5 | 0.04% | 16.30% |
| XTC1-p29 | (P50897) Palmitoyl-protein thioesterase 1 precursor (EC 3.1.2.22) (Palmitoyl-protein hydrolase 1)                                                                                                                                                 | PPT1_HUMAN  | 34176  | 100% | 3 | 3 | 4 | 0.04% | 18.30% |
| XTC1-p29 | (P50897) Palmitoyl-protein thioesterase 1 precursor (EC 3.1.2.22) (Palmitoyl-protein hydrolase 1)                                                                                                                                                 | PPT1_HUMAN  | 34176  | 100% | 2 | 2 | 4 | 0.04% | 13.40% |
| XTC1-p29 | (P50897) Palmitoyl-protein thioesterase 1 precursor (EC 3.1.2.22) (Palmitoyl-protein hydrolase 1)                                                                                                                                                 | PPT1_HUMAN  | 34176  | 100% | 3 | 4 | 4 | 0.03% | 19.00% |
| XTC1-p29 | (P51572) B-cell receptor-associated protein 31 (BCR associated protein Bap31) (p28 Bap31) (CDM protein) (6C6-AG tumor-associated antigen) (DXS1357E)                                                                                              | BAP31_HUMAN | 27843  | 100% | 2 | 2 | 3 | 0.03% | 7.35%  |
| XTC1-p29 | (P51572) B-cell receptor-associated protein 31 (BCR associated protein Bap31) (p28 Bap31) (CDM protein) (6C6-AG tumor-associated antigen) (DXS1357E)                                                                                              | BAP31_HUMAN | 27843  | 100% | 3 | 3 | 4 | 0.04% | 15.50% |
| XTC1-p29 | (P51610) Host cell factor (HCF) (HCF-1) (C1 factor) (VP16 accessory protein) (VCAF) (CFF) [Contains: HCF N-terminal chain 1; HCF N-terminal chain 2; HCF N-terminal chain 3; HCF N-terminal chain 4; HCF N-terminal chain 5; HCF N-terminal chain | HCFC1_HUMAN | 208816 | 100% | 2 | 3 | 4 | 0.04% | 1.33%  |
| XTC1-p29 | (P51610) Host cell factor (HCF) (HCF-1) (C1 factor) (VP16 accessory protein) (VCAF) (CFF) [Contains: HCF N-terminal chain 1; HCF N-terminal chain 2; HCF N-terminal chain 3; HCF N-terminal chain 4; HCF N-terminal chain 5; HCF N-terminal chain | HCFC1_HUMAN | 208816 | 100% | 2 | 3 | 4 | 0.04% | 1.47%  |

## Protein Identified Sequence Coverage in XTC-1

|          |                                                                                                                                                                                                                                                     |             |        |      |   |   |   |       |        |
|----------|-----------------------------------------------------------------------------------------------------------------------------------------------------------------------------------------------------------------------------------------------------|-------------|--------|------|---|---|---|-------|--------|
| XTC1-p29 | (P51610) Host cell factor (HCF) (HCF-1) (C1 factor) (VP16 accessory protein) (VCAF) (CFF) [Contains: HCF N-terminal chain 1; HCF N-terminal chain 2; HCF N-terminal chain 3; HCF N-terminal chain 4; HCF N-terminal chain 5; HCF N-terminal chain   | HCFC1_HUMAN | 208816 | 100% | 2 | 2 | 3 | 0.03% | 1.92%  |
| XTC1-p29 | (P51610) Host cell factor (HCF) (HCF-1) (C1 factor) (VP16 accessory protein) (VCAF) (CFF) [Contains: HCF N-terminal chain 1; HCF N-terminal chain 2; HCF N-terminal chain 3; HCF N-terminal chain 4; HCF N-terminal chain 5; HCF N-terminal chain   | HCFC1_HUMAN | 208816 | 100% | 2 | 2 | 3 | 0.03% | 2.90%  |
| XTC1-p29 | (P51688) N-sulphoglucosamine sulphohydrolase precursor (EC 3.10.1.1) (Sulfoglucosamine sulfamidase) (Sulphamidase)                                                                                                                                  | SPHM_HUMAN  | 56678  | 100% | 3 | 3 | 4 | 0.04% | 11.20% |
| XTC1-p29 | (P51688) N-sulphoglucosamine sulphohydrolase precursor (EC 3.10.1.1) (Sulfoglucosamine sulfamidase) (Sulphamidase)                                                                                                                                  | SPHM_HUMAN  | 56678  | 100% | 2 | 2 | 2 | 0.02% | 8.57%  |
| XTC1-p29 | (P51688) N-sulphoglucosamine sulphohydrolase precursor (EC 3.10.1.1) (Sulfoglucosamine sulfamidase) (Sulphamidase)                                                                                                                                  | SPHM_HUMAN  | 56678  | 100% | 5 | 5 | 5 | 0.05% | 17.50% |
| XTC1-p29 | (P51688) N-sulphoglucosamine sulphohydrolase precursor (EC 3.10.1.1) (Sulfoglucosamine sulfamidase) (Sulphamidase)                                                                                                                                  | SPHM_HUMAN  | 56678  | 100% | 2 | 2 | 3 | 0.03% | 4.78%  |
| XTC1-p29 | (P51688) N-sulphoglucosamine sulphohydrolase precursor (EC 3.10.1.1) (Sulfoglucosamine sulfamidase) (Sulphamidase)                                                                                                                                  | SPHM_HUMAN  | 56678  | 100% | 3 | 3 | 4 | 0.04% | 10.80% |
| XTC1-p29 | (P53365) Arfaptin-2 (ADP-ribosylation factor-interacting protein 2) (Partner of RAC1) (POR1 protein)                                                                                                                                                | ARFP2_HUMAN | 37839  | 100% | 3 | 3 | 3 | 0.03% | 14.40% |
| XTC1-p29 | (P53634) Dipeptidyl-peptidase 1 precursor (EC 3.4.14.1) (Dipeptidyl-peptidase I) (DPP-I) (DPPI) (Cathepsin C) (Cathepsin J) (Dipeptidyl transferase) [Contains: Dipeptidyl-peptidase 1 exclusion domain chain (Dipeptidyl-peptidase I exclusion dom | CATC_HUMAN  | 51824  | 100% | 3 | 4 | 6 | 0.06% | 13.60% |
| XTC1-p29 | (P53634) Dipeptidyl-peptidase 1 precursor (EC 3.4.14.1) (Dipeptidyl-peptidase I) (DPP-I) (DPPI) (Cathepsin C) (Cathepsin J) (Dipeptidyl transferase) [Contains: Dipeptidyl-peptidase 1 exclusion domain chain (Dipeptidyl-peptidase I exclusion dom | CATC_HUMAN  | 51824  | 100% | 2 | 2 | 2 | 0.02% | 6.70%  |
| XTC1-p29 | (P53634) Dipeptidyl-peptidase 1 precursor (EC 3.4.14.1) (Dipeptidyl-peptidase I) (DPP-I) (DPPI) (Cathepsin C) (Cathepsin J) (Dipeptidyl transferase) [Contains: Dipeptidyl-peptidase 1 exclusion domain chain (Dipeptidyl-peptidase I exclusion dom | CATC_HUMAN  | 51824  | 100% | 2 | 3 | 7 | 0.07% | 12.10% |
| XTC1-p29 | (P53634) Dipeptidyl-peptidase 1 precursor (EC 3.4.14.1) (Dipeptidyl-peptidase I) (DPP-I) (DPPI) (Cathepsin C) (Cathepsin J) (Dipeptidyl transferase) [Contains: Dipeptidyl-peptidase 1 exclusion domain chain (Dipeptidyl-peptidase I exclusion dom | CATC_HUMAN  | 51824  | 100% | 3 | 3 | 5 | 0.05% | 9.29%  |

## Protein Identified Sequence Coverage in XTC-1

|          |                                                                                                                                                                                                                                                     |            |       |      |   |   |   |       |        |
|----------|-----------------------------------------------------------------------------------------------------------------------------------------------------------------------------------------------------------------------------------------------------|------------|-------|------|---|---|---|-------|--------|
| XTC1-p29 | (P53634) Dipeptidyl-peptidase 1 precursor (EC 3.4.14.1) (Dipeptidyl-peptidase I) (DPP-I) (DPPI) (Cathepsin C) (Cathepsin J) (Dipeptidyl transferase) [Contains: Dipeptidyl-peptidase 1 exclusion domain chain (Dipeptidyl-peptidase I exclusion dom | CATC_HUMAN | 51824 | 100% | 2 | 2 | 3 | 0.03% | 7.56%  |
| XTC1-p29 | (P53634) Dipeptidyl-peptidase 1 precursor (EC 3.4.14.1) (Dipeptidyl-peptidase I) (DPP-I) (DPPI) (Cathepsin C) (Cathepsin J) (Dipeptidyl transferase) [Contains: Dipeptidyl-peptidase 1 exclusion domain chain (Dipeptidyl-peptidase I exclusion dom | CATC_HUMAN | 51824 | 100% | 2 | 2 | 3 | 0.03% | 7.56%  |
| XTC1-p29 | (P53634) Dipeptidyl-peptidase 1 precursor (EC 3.4.14.1) (Dipeptidyl-peptidase I) (DPP-I) (DPPI) (Cathepsin C) (Cathepsin J) (Dipeptidyl transferase) [Contains: Dipeptidyl-peptidase 1 exclusion domain chain (Dipeptidyl-peptidase I exclusion dom | CATC_HUMAN | 51824 | 100% | 5 | 6 | 6 | 0.05% | 19.00% |
| XTC1-p29 | (P53634) Dipeptidyl-peptidase 1 precursor (EC 3.4.14.1) (Dipeptidyl-peptidase I) (DPP-I) (DPPI) (Cathepsin C) (Cathepsin J) (Dipeptidyl transferase) [Contains: Dipeptidyl-peptidase 1 exclusion domain chain (Dipeptidyl-peptidase I exclusion dom | CATC_HUMAN | 51824 | 100% | 4 | 4 | 5 | 0.04% | 14.70% |
| XTC1-p29 | (P53634) Dipeptidyl-peptidase 1 precursor (EC 3.4.14.1) (Dipeptidyl-peptidase I) (DPP-I) (DPPI) (Cathepsin C) (Cathepsin J) (Dipeptidyl transferase) [Contains: Dipeptidyl-peptidase 1 exclusion domain chain (Dipeptidyl-peptidase I exclusion dom | CATC_HUMAN | 51824 | 100% | 2 | 2 | 4 | 0.04% | 9.72%  |
| XTC1-p29 | (P53634) Dipeptidyl-peptidase 1 precursor (EC 3.4.14.1) (Dipeptidyl-peptidase I) (DPP-I) (DPPI) (Cathepsin C) (Cathepsin J) (Dipeptidyl transferase) [Contains: Dipeptidyl-peptidase 1 exclusion domain chain (Dipeptidyl-peptidase I exclusion dom | CATC_HUMAN | 51824 | 100% | 2 | 2 | 2 | 0.02% | 6.48%  |
| XTC1-p29 | (P53634) Dipeptidyl-peptidase 1 precursor (EC 3.4.14.1) (Dipeptidyl-peptidase I) (DPP-I) (DPPI) (Cathepsin C) (Cathepsin J) (Dipeptidyl transferase) [Contains: Dipeptidyl-peptidase 1 exclusion domain chain (Dipeptidyl-peptidase I exclusion dom | CATC_HUMAN | 51824 | 100% | 2 | 3 | 6 | 0.05% | 9.29%  |
| XTC1-p29 | (P53634) Dipeptidyl-peptidase 1 precursor (EC 3.4.14.1) (Dipeptidyl-peptidase I) (DPP-I) (DPPI) (Cathepsin C) (Cathepsin J) (Dipeptidyl transferase) [Contains: Dipeptidyl-peptidase 1 exclusion domain chain (Dipeptidyl-peptidase I exclusion dom | CATC_HUMAN | 51824 | 100% | 2 | 2 | 6 | 0.05% | 11.40% |
| XTC1-p29 | (P54577) Tyrosyl-tRNA synthetase, cytoplasmic (EC 6.1.1.1) (Tyrosyl--tRNA ligase) (TyrRS)                                                                                                                                                           | SYYC_HUMAN | 58996 | 100% | 2 | 2 | 2 | 0.02% | 3.80%  |
| XTC1-p29 | (P54577) Tyrosyl-tRNA synthetase, cytoplasmic (EC 6.1.1.1) (Tyrosyl--tRNA ligase) (TyrRS)                                                                                                                                                           | SYYC_HUMAN | 58996 | 100% | 2 | 2 | 2 | 0.02% | 6.64%  |
| XTC1-p29 | (P54577) Tyrosyl-tRNA synthetase, cytoplasmic (EC 6.1.1.1) (Tyrosyl--tRNA ligase) (TyrRS)                                                                                                                                                           | SYYC_HUMAN | 58996 | 100% | 2 | 2 | 2 | 0.02% | 6.45%  |

## Protein Identified Sequence Coverage in XTC-1

|          |                                                                                                                                                                                                        |             |       |      |   |    |    |       |        |
|----------|--------------------------------------------------------------------------------------------------------------------------------------------------------------------------------------------------------|-------------|-------|------|---|----|----|-------|--------|
| XTC1-p29 | (P54727) UV excision repair protein RAD23 homolog B (hHR23B) (XP-C repair-complementing complex 58 kDa protein) (p58)                                                                                  | RD23B_HUMAN | 43153 | 100% | 2 | 2  | 3  | 0.03% | 7.33%  |
| XTC1-p29 | (P54727) UV excision repair protein RAD23 homolog B (hHR23B) (XP-C repair-complementing complex 58 kDa protein) (p58)                                                                                  | RD23B_HUMAN | 43153 | 100% | 2 | 3  | 3  | 0.03% | 16.10% |
| XTC1-p29 | (P54802) Alpha-N-acetylglucosaminidase precursor (EC 3.2.1.50) (N-acetyl-alpha-glucosaminidase) (NAG) [Contains: Alpha-N-acetylglucosaminidase 82 kDa form; Alpha-N-acetylglucosaminidase 77 kDa form] | ANAG_HUMAN  | 82150 | 100% | 2 | 2  | 2  | 0.02% | 5.92%  |
| XTC1-p29 | (P55145) ARMET protein precursor (Arginine-rich protein)                                                                                                                                               | ARMET_HUMAN | 20240 | 100% | 2 | 2  | 2  | 0.02% | 17.30% |
| XTC1-p29 | (P55145) ARMET protein precursor (Arginine-rich protein)                                                                                                                                               | ARMET_HUMAN | 20240 | 100% | 2 | 3  | 3  | 0.03% | 9.50%  |
| XTC1-p29 | (P55145) ARMET protein precursor (Arginine-rich protein)                                                                                                                                               | ARMET_HUMAN | 20240 | 100% | 3 | 4  | 4  | 0.04% | 19.00% |
| XTC1-p29 | (P55145) ARMET protein precursor (Arginine-rich protein)                                                                                                                                               | ARMET_HUMAN | 20240 | 100% | 3 | 3  | 3  | 0.03% | 17.30% |
| XTC1-p29 | (P55285) Cadherin-6 precursor (Kidney-cadherin) (K cadherin)                                                                                                                                           | CADH6_HUMAN | 88293 | 100% | 2 | 2  | 3  | 0.03% | 4.81%  |
| XTC1-p29 | (P55327) Tumor protein D52 (N8 protein)                                                                                                                                                                | TPD52_HUMAN | 19845 | 100% | 2 | 2  | 3  | 0.03% | 25.00% |
| XTC1-p29 | (P55327) Tumor protein D52 (N8 protein)                                                                                                                                                                | TPD52_HUMAN | 19845 | 100% | 3 | 3  | 3  | 0.03% | 27.70% |
| XTC1-p29 | (P55327) Tumor protein D52 (N8 protein)                                                                                                                                                                | TPD52_HUMAN | 19845 | 100% | 2 | 2  | 2  | 0.02% | 22.80% |
| XTC1-p29 | (P55327) Tumor protein D52 (N8 protein)                                                                                                                                                                | TPD52_HUMAN | 19845 | 100% | 2 | 2  | 2  | 0.02% | 19.00% |
| XTC1-p29 | (P55327) Tumor protein D52 (N8 protein)                                                                                                                                                                | TPD52_HUMAN | 19845 | 100% | 3 | 3  | 3  | 0.03% | 44.00% |
| XTC1-p29 | (P55327) Tumor protein D52 (N8 protein)                                                                                                                                                                | TPD52_HUMAN | 19845 | 100% | 7 | 9  | 19 | 0.18% | 58.20% |
| XTC1-p29 | (P55327) Tumor protein D52 (N8 protein)                                                                                                                                                                | TPD52_HUMAN | 19845 | 100% | 7 | 8  | 15 | 0.14% | 65.80% |
| XTC1-p29 | (P55327) Tumor protein D52 (N8 protein)                                                                                                                                                                | TPD52_HUMAN | 19845 | 100% | 4 | 7  | 16 | 0.15% | 47.30% |
| XTC1-p29 | (P55327) Tumor protein D52 (N8 protein)                                                                                                                                                                | TPD52_HUMAN | 19845 | 100% | 9 | 12 | 26 | 0.23% | 72.30% |
| XTC1-p29 | (P55327) Tumor protein D52 (N8 protein)                                                                                                                                                                | TPD52_HUMAN | 19845 | 100% | 5 | 6  | 9  | 0.08% | 28.80% |
| XTC1-p29 | (P55327) Tumor protein D52 (N8 protein)                                                                                                                                                                | TPD52_HUMAN | 19845 | 100% | 4 | 4  | 25 | 0.24% | 47.30% |
| XTC1-p29 | (P55327) Tumor protein D52 (N8 protein)                                                                                                                                                                | TPD52_HUMAN | 19845 | 100% | 4 | 5  | 12 | 0.10% | 39.10% |
| XTC1-p29 | (P55327) Tumor protein D52 (N8 protein)                                                                                                                                                                | TPD52_HUMAN | 19845 | 100% | 5 | 7  | 35 | 0.30% | 54.90% |
| XTC1-p29 | (P55327) Tumor protein D52 (N8 protein)                                                                                                                                                                | TPD52_HUMAN | 19845 | 100% | 4 | 5  | 34 | 0.30% | 47.30% |
| XTC1-p29 | (P55327) Tumor protein D52 (N8 protein)                                                                                                                                                                | TPD52_HUMAN | 19845 | 100% | 3 | 4  | 51 | 0.44% | 44.60% |
| XTC1-p29 | (P55327) Tumor protein D52 (N8 protein)                                                                                                                                                                | TPD52_HUMAN | 19845 | 100% | 3 | 3  | 4  | 0.04% | 44.60% |
| XTC1-p29 | (P56159) GDNF family receptor alpha-1 precursor (GFR-alpha-1) (GDNF receptor alpha) (GDNFR-alpha) (TGF-beta-related neurotrophic factor receptor 1) (RET ligand 1)                                     | GFRA1_HUMAN | 51439 | 100% | 2 | 2  | 2  | 0.02% | 6.67%  |
| XTC1-p29 | (P56159) GDNF family receptor alpha-1 precursor (GFR-alpha-1) (GDNF receptor alpha) (GDNFR-alpha) (TGF-beta-related neurotrophic factor receptor 1) (RET ligand 1)                                     | GFRA1_HUMAN | 51439 | 100% | 4 | 4  | 6  | 0.06% | 11.60% |
| XTC1-p29 | (P56159) GDNF family receptor alpha-1 precursor (GFR-alpha-1) (GDNF receptor alpha) (GDNFR-alpha) (TGF-beta-related neurotrophic factor receptor 1) (RET ligand 1)                                     | GFRA1_HUMAN | 51439 | 100% | 5 | 5  | 5  | 0.04% | 14.40% |
| XTC1-p29 | (P56159) GDNF family receptor alpha-1 precursor (GFR-alpha-1) (GDNF receptor alpha) (GDNFR-alpha) (TGF-beta-related neurotrophic factor receptor 1) (RET ligand 1)                                     | GFRA1_HUMAN | 51439 | 100% | 2 | 2  | 3  | 0.03% | 5.16%  |



Protein Identified Sequence Coverage in XTC-1

|          |                                                                                                                                                                                                                                         |                |       |      |   |   |    |       |        |
|----------|-----------------------------------------------------------------------------------------------------------------------------------------------------------------------------------------------------------------------------------------|----------------|-------|------|---|---|----|-------|--------|
| XTC1-p29 | (P59998) Actin-related protein 2/3 complex subunit 4 (ARP2/3 complex 20 kDa subunit) (p20-ARC)                                                                                                                                          | ARPC4_HUMAN    | 19518 | 100% | 2 | 2 | 2  | 0.02% | 11.40% |
| XTC1-p29 | (P60174) Triosephosphate isomerase (EC 5.3.1.1) (TIM) (Triose-phosphate isomerase)                                                                                                                                                      | TPIS_HUMAN     | 26520 | 100% | 2 | 2 | 2  | 0.02% | 17.70% |
| XTC1-p29 | (P60709) Actin, cytoplasmic 1 (Beta-actin)                                                                                                                                                                                              | ACTB_HUMAN,ACT | 41720 | 100% | 6 | 7 | 10 | 0.09% | 29.10% |
| XTC1-p29 | (P60709) Actin, cytoplasmic 1 (Beta-actin)                                                                                                                                                                                              | ACTB_HUMAN,ACT | 41776 | 100% | 7 | 8 | 14 | 0.13% | 31.70% |
| XTC1-p29 | (P60709) Actin, cytoplasmic 1 (Beta-actin)                                                                                                                                                                                              | ACTB_HUMAN,ACT | 41720 | 100% | 2 | 2 | 6  | 0.05% | 12.30% |
| XTC1-p29 | (P60709) Actin, cytoplasmic 1 (Beta-actin)                                                                                                                                                                                              | ACTB_HUMAN,ACT | 41776 | 100% | 7 | 8 | 13 | 0.12% | 28.30% |
| XTC1-p29 | (P60709) Actin, cytoplasmic 1 (Beta-actin)                                                                                                                                                                                              | ACTB_HUMAN,ACT | 41720 | 100% | 6 | 8 | 13 | 0.12% | 21.10% |
| XTC1-p29 | (P60709) Actin, cytoplasmic 1 (Beta-actin)                                                                                                                                                                                              | ACTB_HUMAN,ACT | 41720 | 100% | 2 | 2 | 3  | 0.03% | 13.90% |
| XTC1-p29 | (P60709) Actin, cytoplasmic 1 (Beta-actin)                                                                                                                                                                                              | ACTB_HUMAN,ACT | 41776 | 100% | 5 | 6 | 9  | 0.08% | 18.10% |
| XTC1-p29 | (P60709) Actin, cytoplasmic 1 (Beta-actin)                                                                                                                                                                                              | ACTB_HUMAN,ACT | 41720 | 100% | 2 | 3 | 3  | 0.03% | 13.60% |
| XTC1-p29 | (P60866) 40S ribosomal protein S20                                                                                                                                                                                                      | RS20_HUMAN     | 13355 | 100% | 2 | 2 | 2  | 0.02% | 22.70% |
| XTC1-p29 | (P61289) Proteasome activator complex subunit 3 (Proteasome activator 28-gamma subunit) (PA28gamma) (PA28g) (Activator of multicatalytic protease subunit 3) (11S regulator complex gamma subunit) (REG-gamma) (Ki nuclear autoantigen) | PSME3_HUMAN    | 29489 | 100% | 2 | 2 | 3  | 0.03% | 11.80% |
| XTC1-p29 | (P61289) Proteasome activator complex subunit 3 (Proteasome activator 28-gamma subunit) (PA28gamma) (PA28g) (Activator of multicatalytic protease subunit 3) (11S regulator complex gamma subunit) (REG-gamma) (Ki nuclear autoantigen) | PSME3_HUMAN    | 29489 | 100% | 4 | 4 | 4  | 0.04% | 21.30% |
| XTC1-p29 | (P61289) Proteasome activator complex subunit 3 (Proteasome activator 28-gamma subunit) (PA28gamma) (PA28g) (Activator of multicatalytic protease subunit 3) (11S regulator complex gamma subunit) (REG-gamma) (Ki nuclear autoantigen) | PSME3_HUMAN    | 29489 | 100% | 2 | 2 | 3  | 0.03% | 11.80% |
| XTC1-p29 | (P61289) Proteasome activator complex subunit 3 (Proteasome activator 28-gamma subunit) (PA28gamma) (PA28g) (Activator of multicatalytic protease subunit 3) (11S regulator complex gamma subunit) (REG-gamma) (Ki nuclear autoantigen) | PSME3_HUMAN    | 29489 | 100% | 5 | 5 | 5  | 0.04% | 23.60% |
| XTC1-p29 | (P61289) Proteasome activator complex subunit 3 (Proteasome activator 28-gamma subunit) (PA28gamma) (PA28g) (Activator of multicatalytic protease subunit 3) (11S regulator complex gamma subunit) (REG-gamma) (Ki nuclear autoantigen) | PSME3_HUMAN    | 29489 | 100% | 2 | 2 | 3  | 0.03% | 11.80% |
| XTC1-p29 | (P61289) Proteasome activator complex subunit 3 (Proteasome activator 28-gamma subunit) (PA28gamma) (PA28g) (Activator of multicatalytic protease subunit 3) (11S regulator complex gamma subunit) (REG-gamma) (Ki nuclear autoantigen) | PSME3_HUMAN    | 29489 | 100% | 2 | 2 | 3  | 0.03% | 11.80% |
| XTC1-p29 | (P61604) 10 kDa heat shock protein, mitochondrial (Hsp10) (10 kDa chaperonin) (CPN10) (Early-pregnancy factor) (EPF)                                                                                                                    | CH10_HUMAN     | 10783 | 100% | 2 | 2 | 3  | 0.03% | 25.70% |

## Protein Identified Sequence Coverage in XTC-1

|          |                                                                                                                      |             |       |      |   |    |     |       |        |
|----------|----------------------------------------------------------------------------------------------------------------------|-------------|-------|------|---|----|-----|-------|--------|
| XTC1-p29 | (P61604) 10 kDa heat shock protein, mitochondrial (Hsp10) (10 kDa chaperonin) (CPN10) (Early-pregnancy factor) (EPF) | CH10_HUMAN  | 10783 | 100% | 2 | 3  | 4   | 0.04% | 25.70% |
| XTC1-p29 | (P61604) 10 kDa heat shock protein, mitochondrial (Hsp10) (10 kDa chaperonin) (CPN10) (Early-pregnancy factor) (EPF) | CH10_HUMAN  | 10783 | 100% | 3 | 3  | 4   | 0.04% | 35.60% |
| XTC1-p29 | (P61604) 10 kDa heat shock protein, mitochondrial (Hsp10) (10 kDa chaperonin) (CPN10) (Early-pregnancy factor) (EPF) | CH10_HUMAN  | 10783 | 100% | 2 | 3  | 4   | 0.04% | 23.80% |
| XTC1-p29 | (P61604) 10 kDa heat shock protein, mitochondrial (Hsp10) (10 kDa chaperonin) (CPN10) (Early-pregnancy factor) (EPF) | CH10_HUMAN  | 10783 | 100% | 2 | 2  | 4   | 0.03% | 23.80% |
| XTC1-p29 | (P61769) Beta-2-microglobulin precursor [Contains: Beta-2-microglobulin variant pl 5.3]                              | B2MG_HUMAN  | 13697 | 100% | 2 | 2  | 2   | 0.02% | 26.90% |
| XTC1-p29 | (P61916) Epididymal secretory protein E1 precursor (Niemann-Pick disease type C2 protein) (hE1)                      | NPC2_HUMAN  | 16552 | 100% | 2 | 2  | 9   | 0.09% | 26.50% |
| XTC1-p29 | (P61916) Epididymal secretory protein E1 precursor (Niemann-Pick disease type C2 protein) (hE1)                      | NPC2_HUMAN  | 16552 | 100% | 2 | 2  | 17  | 0.16% | 26.50% |
| XTC1-p29 | (P61916) Epididymal secretory protein E1 precursor (Niemann-Pick disease type C2 protein) (hE1)                      | NPC2_HUMAN  | 16552 | 100% | 2 | 3  | 5   | 0.05% | 25.80% |
| XTC1-p29 | (P61916) Epididymal secretory protein E1 precursor (Niemann-Pick disease type C2 protein) (hE1)                      | NPC2_HUMAN  | 16552 | 100% | 3 | 3  | 5   | 0.05% | 31.80% |
| XTC1-p29 | (P61916) Epididymal secretory protein E1 precursor (Niemann-Pick disease type C2 protein) (hE1)                      | NPC2_HUMAN  | 16552 | 100% | 2 | 3  | 10  | 0.09% | 25.80% |
| XTC1-p29 | (P61916) Epididymal secretory protein E1 precursor (Niemann-Pick disease type C2 protein) (hE1)                      | NPC2_HUMAN  | 16552 | 100% | 3 | 4  | 12  | 0.11% | 32.50% |
| XTC1-p29 | (P61916) Epididymal secretory protein E1 precursor (Niemann-Pick disease type C2 protein) (hE1)                      | NPC2_HUMAN  | 16552 | 100% | 4 | 4  | 10  | 0.09% | 37.70% |
| XTC1-p29 | (P61916) Epididymal secretory protein E1 precursor (Niemann-Pick disease type C2 protein) (hE1)                      | NPC2_HUMAN  | 16552 | 100% | 3 | 3  | 6   | 0.05% | 23.80% |
| XTC1-p29 | (P61978) Heterogeneous nuclear ribonucleoprotein K (hnRNP K) (Transformation up-regulated nuclear protein) (TUNP)    | HNRPK_HUMAN | 50961 | 100% | 2 | 2  | 2   | 0.02% | 9.07%  |
| XTC1-p29 | (P61978) Heterogeneous nuclear ribonucleoprotein K (hnRNP K) (Transformation up-regulated nuclear protein) (TUNP)    | HNRPK_HUMAN | 50961 | 100% | 2 | 2  | 3   | 0.03% | 7.13%  |
| XTC1-p29 | (P62081) 40S ribosomal protein S7                                                                                    | RS7_HUMAN   | 22110 | 100% | 2 | 2  | 2   | 0.02% | 26.80% |
| XTC1-p29 | (P62081) 40S ribosomal protein S7                                                                                    | RS7_HUMAN   | 22110 | 100% | 2 | 3  | 4   | 0.04% | 26.80% |
| XTC1-p29 | (P62277) 40S ribosomal protein S13                                                                                   | RS13_HUMAN  | 17074 | 100% | 2 | 2  | 3   | 0.03% | 18.70% |
| XTC1-p29 | (P62277) 40S ribosomal protein S13                                                                                   | RS13_HUMAN  | 17074 | 100% | 3 | 3  | 4   | 0.04% | 24.70% |
| XTC1-p29 | (P62277) 40S ribosomal protein S13                                                                                   | RS13_HUMAN  | 17074 | 100% | 2 | 2  | 3   | 0.03% | 14.70% |
| XTC1-p29 | (P62805) Histone H4                                                                                                  | H4_HUMAN    | 11219 | 100% | 2 | 2  | 2   | 0.02% | 23.50% |
| XTC1-p29 | (P62805) Histone H4                                                                                                  | H4_HUMAN    | 11219 | 100% | 4 | 4  | 4   | 0.04% | 51.00% |
| XTC1-p29 | (P62805) Histone H4                                                                                                  | H4_HUMAN    | 11219 | 100% | 7 | 9  | 20  | 0.18% | 44.10% |
| XTC1-p29 | (P62805) Histone H4                                                                                                  | H4_HUMAN    | 11219 | 100% | 8 | 10 | 30  | 0.28% | 53.90% |
| XTC1-p29 | (P62805) Histone H4                                                                                                  | H4_HUMAN    | 11219 | 100% | 9 | 10 | 117 | 1.07% | 53.90% |
| XTC1-p29 | (P62805) Histone H4                                                                                                  | H4_HUMAN    | 11219 | 100% | 9 | 11 | 39  | 0.35% | 53.90% |

## Protein Identified Sequence Coverage in XTC-1

|          |                                                                                                                                                                                                                                                   |             |       |      |   |    |    |       |        |
|----------|---------------------------------------------------------------------------------------------------------------------------------------------------------------------------------------------------------------------------------------------------|-------------|-------|------|---|----|----|-------|--------|
| XTC1-p29 | (P62805) Histone H4                                                                                                                                                                                                                               | H4_HUMAN    | 11219 | 100% | 7 | 7  | 23 | 0.20% | 45.10% |
| XTC1-p29 | (P62805) Histone H4                                                                                                                                                                                                                               | H4_HUMAN    | 11219 | 100% | 3 | 3  | 9  | 0.08% | 29.40% |
| XTC1-p29 | (P62805) Histone H4                                                                                                                                                                                                                               | H4_HUMAN    | 11219 | 100% | 2 | 2  | 5  | 0.04% | 17.60% |
| XTC1-p29 | (P62805) Histone H4                                                                                                                                                                                                                               | H4_HUMAN    | 11219 | 100% | 2 | 3  | 3  | 0.03% | 24.50% |
| XTC1-p29 | (P62854) 40S ribosomal protein S26                                                                                                                                                                                                                | RS26_HUMAN  | 12866 | 100% | 2 | 2  | 3  | 0.03% | 21.10% |
| XTC1-p29 | (P62937) Peptidyl-prolyl cis-trans isomerase A (EC 5.2.1.8) (PPIase A) (Rotamase A) (Cyclophilin A) (Cyclosporin A-binding protein)                                                                                                               | PPIA_HUMAN  | 17864 | 100% | 7 | 10 | 16 | 0.15% | 51.80% |
| XTC1-p29 | (P62937) Peptidyl-prolyl cis-trans isomerase A (EC 5.2.1.8) (PPIase A) (Rotamase A) (Cyclophilin A) (Cyclosporin A-binding protein)                                                                                                               | PPIA_HUMAN  | 17864 | 100% | 8 | 10 | 18 | 0.17% | 60.40% |
| XTC1-p29 | (P62937) Peptidyl-prolyl cis-trans isomerase A (EC 5.2.1.8) (PPIase A) (Rotamase A) (Cyclophilin A) (Cyclosporin A-binding protein)                                                                                                               | PPIA_HUMAN  | 17864 | 100% | 6 | 8  | 19 | 0.17% | 43.90% |
| XTC1-p29 | (P62937) Peptidyl-prolyl cis-trans isomerase A (EC 5.2.1.8) (PPIase A) (Rotamase A) (Cyclophilin A) (Cyclosporin A-binding protein)                                                                                                               | PPIA_HUMAN  | 17864 | 100% | 8 | 10 | 16 | 0.14% | 60.40% |
| XTC1-p29 | (P62937) Peptidyl-prolyl cis-trans isomerase A (EC 5.2.1.8) (PPIase A) (Rotamase A) (Cyclophilin A) (Cyclosporin A-binding protein)                                                                                                               | PPIA_HUMAN  | 17864 | 100% | 6 | 7  | 14 | 0.12% | 50.60% |
| XTC1-p29 | (P62937) Peptidyl-prolyl cis-trans isomerase A (EC 5.2.1.8) (PPIase A) (Rotamase A) (Cyclophilin A) (Cyclosporin A-binding protein)                                                                                                               | PPIA_HUMAN  | 17864 | 100% | 4 | 5  | 7  | 0.06% | 28.70% |
| XTC1-p29 | (P62937) Peptidyl-prolyl cis-trans isomerase A (EC 5.2.1.8) (PPIase A) (Rotamase A) (Cyclophilin A) (Cyclosporin A-binding protein)                                                                                                               | PPIA_HUMAN  | 17864 | 100% | 2 | 3  | 9  | 0.08% | 19.50% |
| XTC1-p29 | (P62988) Ubiquitin                                                                                                                                                                                                                                | UBIQ_HUMAN  | 8547  | 100% | 2 | 2  | 4  | 0.04% | 32.90% |
| XTC1-p29 | (P62988) Ubiquitin                                                                                                                                                                                                                                | UBIQ_HUMAN  | 8547  | 100% | 3 | 3  | 4  | 0.04% | 44.70% |
| XTC1-p29 | (P62988) Ubiquitin                                                                                                                                                                                                                                | UBIQ_HUMAN  | 8547  | 100% | 3 | 3  | 6  | 0.06% | 50.00% |
| XTC1-p29 | (P62988) Ubiquitin                                                                                                                                                                                                                                | UBIQ_HUMAN  | 8547  | 100% | 2 | 2  | 10 | 0.09% | 32.90% |
| XTC1-p29 | (P62988) Ubiquitin                                                                                                                                                                                                                                | UBIQ_HUMAN  | 8547  | 100% | 4 | 4  | 8  | 0.07% | 61.80% |
| XTC1-p29 | (P62988) Ubiquitin                                                                                                                                                                                                                                | UBIQ_HUMAN  | 8547  | 100% | 4 | 4  | 8  | 0.07% | 61.80% |
| XTC1-p29 | (P62988) Ubiquitin                                                                                                                                                                                                                                | UBIQ_HUMAN  | 8547  | 100% | 2 | 3  | 7  | 0.06% | 32.90% |
| XTC1-p29 | (P63104) 14-3-3 protein zeta/delta (Protein kinase C inhibitor protein 1) (KCIP-1)                                                                                                                                                                | 1433Z_HUMAN | 27728 | 100% | 2 | 3  | 3  | 0.03% | 15.10% |
| XTC1-p29 | (P63104) 14-3-3 protein zeta/delta (Protein kinase C inhibitor protein 1) (KCIP-1)                                                                                                                                                                | 1433Z_HUMAN | 27728 | 100% | 3 | 3  | 3  | 0.03% | 20.00% |
| XTC1-p29 | (P63104) 14-3-3 protein zeta/delta (Protein kinase C inhibitor protein 1) (KCIP-1)                                                                                                                                                                | 1433Z_HUMAN | 27728 | 100% | 3 | 4  | 4  | 0.03% | 19.20% |
| XTC1-p29 | (P67809) Nuclease sensitive element-binding protein 1 (Y-box-binding protein 1) (Y-box transcription factor) (YB-1) (CCAAT-binding transcription factor I subunit A) (CBF-A) (Enhancer factor I subunit A) (EFI-A) (DNA-binding protein B) (DBPB) | YBOX1_HUMAN | 35775 | 100% | 2 | 2  | 2  | 0.02% | 10.50% |
| XTC1-p29 | (P67809) Nuclease sensitive element-binding protein 1 (Y-box-binding protein 1) (Y-box transcription factor) (YB-1) (CCAAT-binding transcription factor I subunit A) (CBF-A) (Enhancer factor I subunit A) (EFI-A) (DNA-binding protein B) (DBPB) | YBOX1_HUMAN | 35775 | 100% | 2 | 2  | 4  | 0.04% | 10.50% |
| XTC1-p29 | (P67936) Tropomyosin alpha-4 chain (Tropomyosin-4) (TM30p1)                                                                                                                                                                                       | TPM4_HUMAN  | 28373 | 100% | 2 | 2  | 2  | 0.02% | 10.50% |
| XTC1-p29 | (P67936) Tropomyosin alpha-4 chain (Tropomyosin-4) (TM30p1)                                                                                                                                                                                       | TPM4_HUMAN  | 28373 | 100% | 4 | 4  | 5  | 0.04% | 16.60% |

## Protein Identified Sequence Coverage in XTC-1

|          |                                                                                                                        |             |       |      |    |    |     |       |        |
|----------|------------------------------------------------------------------------------------------------------------------------|-------------|-------|------|----|----|-----|-------|--------|
| XTC1-p29 | (P68104) Elongation factor 1-alpha 1 (EF-1-alpha-1) (Elongation factor 1 A-1) (eEF1A-1) (Elongation factor Tu) (EF-Tu) | EF1A1_HUMAN | 50123 | 100% | 2  | 2  | 2   | 0.02% | 4.76%  |
| XTC1-p29 | (P68104) Elongation factor 1-alpha 1 (EF-1-alpha-1) (Elongation factor 1 A-1) (eEF1A-1) (Elongation factor Tu) (EF-Tu) | EF1A1_HUMAN | 50123 | 100% | 10 | 11 | 21  | 0.19% | 32.70% |
| XTC1-p29 | (P68104) Elongation factor 1-alpha 1 (EF-1-alpha-1) (Elongation factor 1 A-1) (eEF1A-1) (Elongation factor Tu) (EF-Tu) | EF1A1_HUMAN | 50123 | 100% | 11 | 13 | 18  | 0.17% | 45.90% |
| XTC1-p29 | (P68104) Elongation factor 1-alpha 1 (EF-1-alpha-1) (Elongation factor 1 A-1) (eEF1A-1) (Elongation factor Tu) (EF-Tu) | EF1A1_HUMAN | 50123 | 100% | 9  | 12 | 51  | 0.47% | 35.50% |
| XTC1-p29 | (P68104) Elongation factor 1-alpha 1 (EF-1-alpha-1) (Elongation factor 1 A-1) (eEF1A-1) (Elongation factor Tu) (EF-Tu) | EF1A1_HUMAN | 50123 | 100% | 11 | 14 | 34  | 0.30% | 41.10% |
| XTC1-p29 | (P68104) Elongation factor 1-alpha 1 (EF-1-alpha-1) (Elongation factor 1 A-1) (eEF1A-1) (Elongation factor Tu) (EF-Tu) | EF1A1_HUMAN | 50123 | 100% | 5  | 5  | 12  | 0.11% | 15.60% |
| XTC1-p29 | (P68104) Elongation factor 1-alpha 1 (EF-1-alpha-1) (Elongation factor 1 A-1) (eEF1A-1) (Elongation factor Tu) (EF-Tu) | EF1A1_HUMAN | 50123 | 100% | 6  | 6  | 12  | 0.11% | 31.00% |
| XTC1-p29 | (P68104) Elongation factor 1-alpha 1 (EF-1-alpha-1) (Elongation factor 1 A-1) (eEF1A-1) (Elongation factor Tu) (EF-Tu) | EF1A1_HUMAN | 50123 | 100% | 5  | 5  | 9   | 0.08% | 20.60% |
| XTC1-p29 | (P68104) Elongation factor 1-alpha 1 (EF-1-alpha-1) (Elongation factor 1 A-1) (eEF1A-1) (Elongation factor Tu) (EF-Tu) | EF1A1_HUMAN | 50123 | 100% | 5  | 6  | 85  | 0.72% | 21.90% |
| XTC1-p29 | (P68104) Elongation factor 1-alpha 1 (EF-1-alpha-1) (Elongation factor 1 A-1) (eEF1A-1) (Elongation factor Tu) (EF-Tu) | EF1A1_HUMAN | 50123 | 100% | 3  | 4  | 14  | 0.12% | 15.60% |
| XTC1-p29 | (P68104) Elongation factor 1-alpha 1 (EF-1-alpha-1) (Elongation factor 1 A-1) (eEF1A-1) (Elongation factor Tu) (EF-Tu) | EF1A1_HUMAN | 50123 | 100% | 2  | 3  | 22  | 0.19% | 8.44%  |
| XTC1-p29 | (P68104) Elongation factor 1-alpha 1 (EF-1-alpha-1) (Elongation factor 1 A-1) (eEF1A-1) (Elongation factor Tu) (EF-Tu) | EF1A1_HUMAN | 50123 | 100% | 4  | 5  | 19  | 0.17% | 22.50% |
| XTC1-p29 | (P68104) Elongation factor 1-alpha 1 (EF-1-alpha-1) (Elongation factor 1 A-1) (eEF1A-1) (Elongation factor Tu) (EF-Tu) | EF1A1_HUMAN | 50123 | 100% | 5  | 7  | 119 | 1.02% | 23.80% |
| XTC1-p29 | (P68104) Elongation factor 1-alpha 1 (EF-1-alpha-1) (Elongation factor 1 A-1) (eEF1A-1) (Elongation factor Tu) (EF-Tu) | EF1A1_HUMAN | 50123 | 100% | 6  | 6  | 19  | 0.17% | 35.10% |
| XTC1-p29 | (P68363) Tubulin alpha-ubiquitous chain (Alpha-tubulin ubiquitous) (Tubulin K-alpha-1)                                 | TBAK_HUMAN  | 50134 | 100% | 3  | 3  | 4   | 0.04% | 11.80% |
| XTC1-p29 | (P68363) Tubulin alpha-ubiquitous chain (Alpha-tubulin ubiquitous) (Tubulin K-alpha-1)                                 | TBAK_HUMAN  | 50134 | 100% | 3  | 3  | 3   | 0.03% | 10.20% |
| XTC1-p29 | (P68363) Tubulin alpha-ubiquitous chain (Alpha-tubulin ubiquitous) (Tubulin K-alpha-1)                                 | TBAK_HUMAN  | 50134 | 100% | 3  | 3  | 4   | 0.04% | 9.76%  |
| XTC1-p29 | (P68363) Tubulin alpha-ubiquitous chain (Alpha-tubulin ubiquitous) (Tubulin K-alpha-1)                                 | TBAK_HUMAN  | 50134 | 100% | 3  | 3  | 4   | 0.03% | 8.20%  |
| XTC1-p29 | (P68431) Histone H3.1 (H3/a) (H3/b) (H3/c) (H3/d) (H3/f) (H3/h) (H3/i) (H3/j) (H3/k) (H3/l)                            | H31_HUMAN   | 15256 | 100% | 2  | 2  | 5   | 0.05% | 28.90% |
| XTC1-p29 | (P68431) Histone H3.1 (H3/a) (H3/b) (H3/c) (H3/d) (H3/f) (H3/h) (H3/i) (H3/j) (H3/k) (H3/l)                            | H31_HUMAN   | 15256 | 100% | 3  | 3  | 8   | 0.07% | 37.00% |

## Protein Identified Sequence Coverage in XTC-1

|          |                                                                                                                                                                        |             |        |      |    |    |    |       |        |
|----------|------------------------------------------------------------------------------------------------------------------------------------------------------------------------|-------------|--------|------|----|----|----|-------|--------|
| XTC1-p29 | (P68431) Histone H3.1 (H3/a) (H3/b) (H3/c) (H3/d) (H3/f) (H3/h) (H3/i) (H3/j) (H3/k) (H3/l)                                                                            | H31_HUMAN   | 15256  | 100% | 3  | 3  | 19 | 0.17% | 35.60% |
| XTC1-p29 | (P68431) Histone H3.1 (H3/a) (H3/b) (H3/c) (H3/d) (H3/f) (H3/h) (H3/i) (H3/j) (H3/k) (H3/l)                                                                            | H31_HUMAN   | 15256  | 100% | 2  | 2  | 6  | 0.05% | 28.90% |
| XTC1-p29 | (P80188) Neutrophil gelatinase-associated lipocalin precursor (NGAL) (p25) (25 kDa alpha-2-microglobulin-related subunit of MMP-9) (Lipocalin-2) (Oncogene 24p3)       | NGAL_HUMAN  | 22571  | 100% | 2  | 2  | 3  | 0.03% | 6.57%  |
| XTC1-p29 | (P80188) Neutrophil gelatinase-associated lipocalin precursor (NGAL) (p25) (25 kDa alpha-2-microglobulin-related subunit of MMP-9) (Lipocalin-2) (Oncogene 24p3)       | NGAL_HUMAN  | 22571  | 100% | 2  | 2  | 2  | 0.02% | 6.57%  |
| XTC1-p29 | (P80188) Neutrophil gelatinase-associated lipocalin precursor (NGAL) (p25) (25 kDa alpha-2-microglobulin-related subunit of MMP-9) (Lipocalin-2) (Oncogene 24p3)       | NGAL_HUMAN  | 22571  | 100% | 2  | 2  | 2  | 0.02% | 6.57%  |
| XTC1-p29 | (Q01518) Adenylyl cyclase-associated protein 1 (CAP 1)                                                                                                                 | CAP1_HUMAN  | 51524  | 100% | 2  | 2  | 3  | 0.03% | 7.38%  |
| XTC1-p29 | (Q01518) Adenylyl cyclase-associated protein 1 (CAP 1)                                                                                                                 | CAP1_HUMAN  | 51524  | 100% | 3  | 3  | 5  | 0.04% | 9.07%  |
| XTC1-p29 | (Q01518) Adenylyl cyclase-associated protein 1 (CAP 1)                                                                                                                 | CAP1_HUMAN  | 51524  | 100% | 2  | 3  | 4  | 0.03% | 8.65%  |
| XTC1-p29 | (Q02083) N-acylethanolamine-hydrolyzing acid amidase precursor (EC 3.5.1.-) (N-acylsphingosine amidohydrolase-like) (ASAH-like protein) (Acid ceramidase-like protein) | ASAHL_HUMAN | 40015  | 100% | 2  | 2  | 3  | 0.03% | 10.00% |
| XTC1-p29 | (Q02388) Collagen alpha-1(VII) chain precursor (Long-chain collagen) (LC collagen)                                                                                     | CO7A1_HUMAN | 295200 | 100% | 4  | 4  | 5  | 0.05% | 3.09%  |
| XTC1-p29 | (Q02388) Collagen alpha-1(VII) chain precursor (Long-chain collagen) (LC collagen)                                                                                     | CO7A1_HUMAN | 295200 | 100% | 2  | 3  | 3  | 0.03% | 1.43%  |
| XTC1-p29 | (Q02809) Procollagen-lysine,2-oxoglutarate 5-dioxygenase 1 precursor (EC 1.14.11.4) (Lysyl hydroxylase 1) (LH1)                                                        | PLOD1_HUMAN | 83535  | 100% | 2  | 2  | 3  | 0.03% | 3.58%  |
| XTC1-p29 | (Q02809) Procollagen-lysine,2-oxoglutarate 5-dioxygenase 1 precursor (EC 1.14.11.4) (Lysyl hydroxylase 1) (LH1)                                                        | PLOD1_HUMAN | 83535  | 100% | 7  | 7  | 7  | 0.06% | 14.30% |
| XTC1-p29 | (Q02809) Procollagen-lysine,2-oxoglutarate 5-dioxygenase 1 precursor (EC 1.14.11.4) (Lysyl hydroxylase 1) (LH1)                                                        | PLOD1_HUMAN | 83535  | 100% | 8  | 9  | 14 | 0.13% | 13.30% |
| XTC1-p29 | (Q02809) Procollagen-lysine,2-oxoglutarate 5-dioxygenase 1 precursor (EC 1.14.11.4) (Lysyl hydroxylase 1) (LH1)                                                        | PLOD1_HUMAN | 83535  | 100% | 4  | 4  | 5  | 0.05% | 10.20% |
| XTC1-p29 | (Q02809) Procollagen-lysine,2-oxoglutarate 5-dioxygenase 1 precursor (EC 1.14.11.4) (Lysyl hydroxylase 1) (LH1)                                                        | PLOD1_HUMAN | 83535  | 100% | 10 | 10 | 11 | 0.10% | 21.60% |
| XTC1-p29 | (Q02809) Procollagen-lysine,2-oxoglutarate 5-dioxygenase 1 precursor (EC 1.14.11.4) (Lysyl hydroxylase 1) (LH1)                                                        | PLOD1_HUMAN | 83535  | 100% | 9  | 9  | 14 | 0.12% | 17.20% |
| XTC1-p29 | (Q02809) Procollagen-lysine,2-oxoglutarate 5-dioxygenase 1 precursor (EC 1.14.11.4) (Lysyl hydroxylase 1) (LH1)                                                        | PLOD1_HUMAN | 83535  | 100% | 2  | 2  | 4  | 0.04% | 5.09%  |
| XTC1-p29 | (Q02809) Procollagen-lysine,2-oxoglutarate 5-dioxygenase 1 precursor (EC 1.14.11.4) (Lysyl hydroxylase 1) (LH1)                                                        | PLOD1_HUMAN | 83535  | 100% | 4  | 4  | 5  | 0.04% | 8.25%  |

## Protein Identified Sequence Coverage in XTC-1

|          |                                                                                                                                                                                                                                                     |             |        |      |   |   |    |       |        |
|----------|-----------------------------------------------------------------------------------------------------------------------------------------------------------------------------------------------------------------------------------------------------|-------------|--------|------|---|---|----|-------|--------|
| XTC1-p29 | (Q02809) Procollagen-lysine,2-oxoglutarate 5-dioxygenase 1 precursor (EC 1.14.11.4) (Lysyl hydroxylase 1) (LH1)                                                                                                                                     | PLOD1_HUMAN | 83535  | 100% | 9 | 9 | 13 | 0.11% | 18.00% |
| XTC1-p29 | (Q02809) Procollagen-lysine,2-oxoglutarate 5-dioxygenase 1 precursor (EC 1.14.11.4) (Lysyl hydroxylase 1) (LH1)                                                                                                                                     | PLOD1_HUMAN | 83535  | 100% | 2 | 2 | 2  | 0.02% | 3.85%  |
| XTC1-p29 | (Q02809) Procollagen-lysine,2-oxoglutarate 5-dioxygenase 1 precursor (EC 1.14.11.4) (Lysyl hydroxylase 1) (LH1)                                                                                                                                     | PLOD1_HUMAN | 83535  | 100% | 3 | 4 | 6  | 0.05% | 7.57%  |
| XTC1-p29 | (Q05519) Splicing factor arginine/serine-rich 11 (Arginine-rich 54 kDa nuclear protein) (p54)                                                                                                                                                       | SFR11_HUMAN | 53526  | 100% | 2 | 2 | 3  | 0.03% | 7.85%  |
| XTC1-p29 | (Q05639) Elongation factor 1-alpha 2 (EF-1-alpha-2) (Elongation factor 1 A-2) (eEF1A-2) (Statin S1)                                                                                                                                                 | EF1A2_HUMAN | 50453  | 100% | 2 | 2 | 3  | 0.03% | 22.70% |
| XTC1-p29 | (Q05639) Elongation factor 1-alpha 2 (EF-1-alpha-2) (Elongation factor 1 A-2) (eEF1A-2) (Statin S1)                                                                                                                                                 | EF1A2_HUMAN | 50453  | 100% | 4 | 5 | 8  | 0.07% | 38.40% |
| XTC1-p29 | (Q05639) Elongation factor 1-alpha 2 (EF-1-alpha-2) (Elongation factor 1 A-2) (eEF1A-2) (Statin S1)                                                                                                                                                 | EF1A2_HUMAN | 50453  | 100% | 3 | 4 | 7  | 0.06% | 26.30% |
| XTC1-p29 | (Q05639) Elongation factor 1-alpha 2 (EF-1-alpha-2) (Elongation factor 1 A-2) (eEF1A-2) (Statin S1)                                                                                                                                                 | EF1A2_HUMAN | 50453  | 100% | 5 | 6 | 8  | 0.07% | 40.80% |
| XTC1-p29 | (Q05639) Elongation factor 1-alpha 2 (EF-1-alpha-2) (Elongation factor 1 A-2) (eEF1A-2) (Statin S1)                                                                                                                                                 | EF1A2_HUMAN | 50453  | 100% | 2 | 2 | 3  | 0.03% | 19.00% |
| XTC1-p29 | (Q05639) Elongation factor 1-alpha 2 (EF-1-alpha-2) (Elongation factor 1 A-2) (eEF1A-2) (Statin S1)                                                                                                                                                 | EF1A2_HUMAN | 50453  | 100% | 4 | 4 | 15 | 0.13% | 21.60% |
| XTC1-p29 | (Q05639) Elongation factor 1-alpha 2 (EF-1-alpha-2) (Elongation factor 1 A-2) (eEF1A-2) (Statin S1)                                                                                                                                                 | EF1A2_HUMAN | 50453  | 100% | 2 | 4 | 10 | 0.09% | 21.20% |
| XTC1-p29 | (Q05707) Collagen alpha-1(XIV) chain precursor (Undulin)                                                                                                                                                                                            | COEA1_HUMAN | 193468 | 100% | 2 | 2 | 2  | 0.02% | 1.84%  |
| XTC1-p29 | (Q05707) Collagen alpha-1(XIV) chain precursor (Undulin)                                                                                                                                                                                            | COEA1_HUMAN | 193468 | 100% | 2 | 2 | 2  | 0.02% | 3.17%  |
| XTC1-p29 | (Q05707) Collagen alpha-1(XIV) chain precursor (Undulin)                                                                                                                                                                                            | COEA1_HUMAN | 193468 | 100% | 3 | 3 | 6  | 0.05% | 4.45%  |
| XTC1-p29 | (Q06323) Proteasome activator complex subunit 1 (Proteasome activator 28-alpha subunit) (PA28alpha) (PA28a) (Activator of multicatalytic protease subunit 1) (11S regulator complex alpha subunit) (REG-alpha) (Interferon gamma up-regulated I-51) | PSME1_HUMAN | 28706  | 100% | 4 | 4 | 8  | 0.07% | 23.70% |
| XTC1-p29 | (Q06323) Proteasome activator complex subunit 1 (Proteasome activator 28-alpha subunit) (PA28alpha) (PA28a) (Activator of multicatalytic protease subunit 1) (11S regulator complex alpha subunit) (REG-alpha) (Interferon gamma up-regulated I-51) | PSME1_HUMAN | 28706  | 100% | 4 | 4 | 9  | 0.08% | 22.10% |
| XTC1-p29 | (Q06323) Proteasome activator complex subunit 1 (Proteasome activator 28-alpha subunit) (PA28alpha) (PA28a) (Activator of multicatalytic protease subunit 1) (11S regulator complex alpha subunit) (REG-alpha) (Interferon gamma up-regulated I-51) | PSME1_HUMAN | 28706  | 100% | 4 | 4 | 6  | 0.05% | 18.50% |
| XTC1-p29 | (Q06323) Proteasome activator complex subunit 1 (Proteasome activator 28-alpha subunit) (PA28alpha) (PA28a) (Activator of multicatalytic protease subunit 1) (11S regulator complex alpha subunit) (REG-alpha) (Interferon gamma up-regulated I-51) | PSME1_HUMAN | 28706  | 100% | 7 | 7 | 11 | 0.10% | 30.90% |

## Protein Identified Sequence Coverage in XTC-1

|          |                                                                                                                                                                                                                                                     |             |        |      |   |   |    |       |        |
|----------|-----------------------------------------------------------------------------------------------------------------------------------------------------------------------------------------------------------------------------------------------------|-------------|--------|------|---|---|----|-------|--------|
| XTC1-p29 | (Q06323) Proteasome activator complex subunit 1 (Proteasome activator 28-alpha subunit) (PA28alpha) (PA28a) (Activator of multicatalytic protease subunit 1) (11S regulator complex alpha subunit) (REG-alpha) (Interferon gamma up-regulated I-51) | PSME1_HUMAN | 28706  | 100% | 5 | 5 | 10 | 0.09% | 27.70% |
| XTC1-p29 | (Q06481) Amyloid-like protein 2 precursor (Amyloid protein homolog) (APPH) (CDEI box-binding protein) (CDEBP)                                                                                                                                       | APLP2_HUMAN | 86937  | 100% | 4 | 5 | 7  | 0.06% | 7.21%  |
| XTC1-p29 | (Q06481) Amyloid-like protein 2 precursor (Amyloid protein homolog) (APPH) (CDEI box-binding protein) (CDEBP)                                                                                                                                       | APLP2_HUMAN | 86937  | 100% | 6 | 7 | 7  | 0.06% | 11.80% |
| XTC1-p29 | (Q06481) Amyloid-like protein 2 precursor (Amyloid protein homolog) (APPH) (CDEI box-binding protein) (CDEBP)                                                                                                                                       | APLP2_HUMAN | 86937  | 100% | 3 | 3 | 5  | 0.04% | 5.64%  |
| XTC1-p29 | (Q06481) Amyloid-like protein 2 precursor (Amyloid protein homolog) (APPH) (CDEI box-binding protein) (CDEBP)                                                                                                                                       | APLP2_HUMAN | 86937  | 100% | 2 | 2 | 3  | 0.03% | 4.98%  |
| XTC1-p29 | (Q06481) Amyloid-like protein 2 precursor (Amyloid protein homolog) (APPH) (CDEI box-binding protein) (CDEBP)                                                                                                                                       | APLP2_HUMAN | 86937  | 100% | 2 | 2 | 2  | 0.02% | 5.90%  |
| XTC1-p29 | (Q06830) Peroxiredoxin-1 (EC 1.11.1.15) (Thioredoxin peroxidase 2) (Thioredoxin-dependent peroxide reductase 2) (Proliferation-associated protein PAG) (Natural killer cell-enhancing factor A) (NKEF-A)                                            | PRDX1_HUMAN | 22093  | 100% | 2 | 2 | 3  | 0.03% | 15.60% |
| XTC1-p29 | (Q06830) Peroxiredoxin-1 (EC 1.11.1.15) (Thioredoxin peroxidase 2) (Thioredoxin-dependent peroxide reductase 2) (Proliferation-associated protein PAG) (Natural killer cell-enhancing factor A) (NKEF-A)                                            | PRDX1_HUMAN | 22093  | 100% | 4 | 4 | 4  | 0.04% | 19.60% |
| XTC1-p29 | (Q06830) Peroxiredoxin-1 (EC 1.11.1.15) (Thioredoxin peroxidase 2) (Thioredoxin-dependent peroxide reductase 2) (Proliferation-associated protein PAG) (Natural killer cell-enhancing factor A) (NKEF-A)                                            | PRDX1_HUMAN | 22093  | 100% | 2 | 2 | 4  | 0.04% | 15.60% |
| XTC1-p29 | (Q07021) Complement component 1 Q subcomponent-binding protein, mitochondrial precursor (Glycoprotein gC1qBP) (C1qBP) (GC1q-R protein) (Hyaluronan-binding protein 1) (Mitochondrial matrix protein p32) (p33)                                      | C1QBP_HUMAN | 31345  | 100% | 2 | 2 | 2  | 0.02% | 19.90% |
| XTC1-p29 | (Q07954) Low-density lipoprotein receptor-related protein 1 precursor (LRP) (Alpha-2-macroglobulin receptor) (A2MR) (Apolipoprotein E receptor) (APOER) (CD91 antigen)                                                                              | LRP1_HUMAN  | 504543 | 100% | 3 | 3 | 3  | 0.03% | 1.23%  |
| XTC1-p29 | (Q07954) Low-density lipoprotein receptor-related protein 1 precursor (LRP) (Alpha-2-macroglobulin receptor) (A2MR) (Apolipoprotein E receptor) (APOER) (CD91 antigen)                                                                              | LRP1_HUMAN  | 504543 | 100% | 2 | 2 | 2  | 0.02% | 0.66%  |
| XTC1-p29 | (Q07954) Low-density lipoprotein receptor-related protein 1 precursor (LRP) (Alpha-2-macroglobulin receptor) (A2MR) (Apolipoprotein E receptor) (APOER) (CD91 antigen)                                                                              | LRP1_HUMAN  | 504543 | 100% | 2 | 2 | 2  | 0.02% | 0.31%  |

## Protein Identified Sequence Coverage in XTC-1

|          |                                                                                                                                                                                 |             |        |      |   |    |    |       |        |
|----------|---------------------------------------------------------------------------------------------------------------------------------------------------------------------------------|-------------|--------|------|---|----|----|-------|--------|
| XTC1-p29 | (Q07954) Low-density lipoprotein receptor-related protein 1 precursor (LRP) (Alpha-2-macroglobulin receptor) (A2MR) (Apolipoprotein E receptor) (APOER) (CD91 antigen)          | LRP1_HUMAN  | 504543 | 100% | 2 | 2  | 3  | 0.03% | 0.81%  |
| XTC1-p29 | (Q07954) Low-density lipoprotein receptor-related protein 1 precursor (LRP) (Alpha-2-macroglobulin receptor) (A2MR) (Apolipoprotein E receptor) (APOER) (CD91 antigen)          | LRP1_HUMAN  | 504543 | 100% | 3 | 3  | 5  | 0.04% | 1.74%  |
| XTC1-p29 | (Q08380) Galectin-3-binding protein precursor (Lectin galactoside-binding soluble 3-binding protein) (Mac-2-binding protein) (Mac-2 BP) (MAC2BP) (Tumor-associated antigen 90K) | LG3BP_HUMAN | 65314  | 100% | 6 | 7  | 11 | 0.10% | 16.20% |
| XTC1-p29 | (Q08380) Galectin-3-binding protein precursor (Lectin galactoside-binding soluble 3-binding protein) (Mac-2-binding protein) (Mac-2 BP) (MAC2BP) (Tumor-associated antigen 90K) | LG3BP_HUMAN | 65314  | 100% | 7 | 7  | 7  | 0.07% | 16.60% |
| XTC1-p29 | (Q08380) Galectin-3-binding protein precursor (Lectin galactoside-binding soluble 3-binding protein) (Mac-2-binding protein) (Mac-2 BP) (MAC2BP) (Tumor-associated antigen 90K) | LG3BP_HUMAN | 65314  | 100% | 8 | 10 | 13 | 0.12% | 17.80% |
| XTC1-p29 | (Q08380) Galectin-3-binding protein precursor (Lectin galactoside-binding soluble 3-binding protein) (Mac-2-binding protein) (Mac-2 BP) (MAC2BP) (Tumor-associated antigen 90K) | LG3BP_HUMAN | 65314  | 100% | 5 | 7  | 13 | 0.12% | 10.10% |
| XTC1-p29 | (Q08380) Galectin-3-binding protein precursor (Lectin galactoside-binding soluble 3-binding protein) (Mac-2-binding protein) (Mac-2 BP) (MAC2BP) (Tumor-associated antigen 90K) | LG3BP_HUMAN | 65314  | 100% | 4 | 4  | 7  | 0.06% | 10.60% |
| XTC1-p29 | (Q08380) Galectin-3-binding protein precursor (Lectin galactoside-binding soluble 3-binding protein) (Mac-2-binding protein) (Mac-2 BP) (MAC2BP) (Tumor-associated antigen 90K) | LG3BP_HUMAN | 65314  | 100% | 5 | 7  | 11 | 0.10% | 12.80% |
| XTC1-p29 | (Q08380) Galectin-3-binding protein precursor (Lectin galactoside-binding soluble 3-binding protein) (Mac-2-binding protein) (Mac-2 BP) (MAC2BP) (Tumor-associated antigen 90K) | LG3BP_HUMAN | 65314  | 100% | 2 | 2  | 2  | 0.02% | 5.98%  |
| XTC1-p29 | (Q08380) Galectin-3-binding protein precursor (Lectin galactoside-binding soluble 3-binding protein) (Mac-2-binding protein) (Mac-2 BP) (MAC2BP) (Tumor-associated antigen 90K) | LG3BP_HUMAN | 65314  | 100% | 6 | 7  | 8  | 0.07% | 17.60% |
| XTC1-p29 | (Q08380) Galectin-3-binding protein precursor (Lectin galactoside-binding soluble 3-binding protein) (Mac-2-binding protein) (Mac-2 BP) (MAC2BP) (Tumor-associated antigen 90K) | LG3BP_HUMAN | 65314  | 100% | 4 | 5  | 8  | 0.07% | 8.89%  |
| XTC1-p29 | (Q08380) Galectin-3-binding protein precursor (Lectin galactoside-binding soluble 3-binding protein) (Mac-2-binding protein) (Mac-2 BP) (MAC2BP) (Tumor-associated antigen 90K) | LG3BP_HUMAN | 65314  | 100% | 3 | 4  | 6  | 0.05% | 10.80% |
| XTC1-p29 | (Q08380) Galectin-3-binding protein precursor (Lectin galactoside-binding soluble 3-binding protein) (Mac-2-binding protein) (Mac-2 BP) (MAC2BP) (Tumor-associated antigen 90K) | LG3BP_HUMAN | 65314  | 100% | 3 | 5  | 7  | 0.06% | 10.10% |
| XTC1-p29 | (Q09666) Neuroblast differentiation-associated protein AHNAK (Desmoyokin) (Fragments)                                                                                           | AHNAK_HUMAN | 312479 | 100% | 6 | 6  | 9  | 0.08% | 3.04%  |



## Protein Identified Sequence Coverage in XTC-1

|          |                                                                                                                                                                   |             |        |      |   |   |    |       |        |
|----------|-------------------------------------------------------------------------------------------------------------------------------------------------------------------|-------------|--------|------|---|---|----|-------|--------|
| XTC1-p29 | (Q09666) Neuroblast differentiation-associated protein AHNAK (Desmoyokin) (Fragments)                                                                             | AHNAK_HUMAN | 312479 | 100% | 6 | 6 | 6  | 0.05% | 2.91%  |
| XTC1-p29 | (Q09666) Neuroblast differentiation-associated protein AHNAK (Desmoyokin) (Fragments)                                                                             | AHNAK_HUMAN | 312479 | 100% | 7 | 7 | 10 | 0.09% | 3.92%  |
| XTC1-p29 | (Q09666) Neuroblast differentiation-associated protein AHNAK (Desmoyokin) (Fragments)                                                                             | AHNAK_HUMAN | 312479 | 100% | 2 | 2 | 3  | 0.03% | 1.45%  |
| XTC1-p29 | (Q09666) Neuroblast differentiation-associated protein AHNAK (Desmoyokin) (Fragments)                                                                             | AHNAK_HUMAN | 312479 | 100% | 7 | 7 | 8  | 0.07% | 3.72%  |
| XTC1-p29 | (Q09666) Neuroblast differentiation-associated protein AHNAK (Desmoyokin) (Fragments)                                                                             | AHNAK_HUMAN | 312479 | 100% | 2 | 2 | 2  | 0.02% | 1.72%  |
| XTC1-p29 | (Q10588) ADP-ribosyl cyclase 2 precursor (EC 3.2.2.5) (Cyclic ADP-ribose hydrolase 2) (cADPr hydrolase 2) (Bone marrow stromal antigen 1) (BST-1) (CD157 antigen) | BST1_HUMAN  | 35721  | 100% | 3 | 3 | 3  | 0.03% | 17.90% |
| XTC1-p29 | (Q10588) ADP-ribosyl cyclase 2 precursor (EC 3.2.2.5) (Cyclic ADP-ribose hydrolase 2) (cADPr hydrolase 2) (Bone marrow stromal antigen 1) (BST-1) (CD157 antigen) | BST1_HUMAN  | 35721  | 100% | 3 | 4 | 5  | 0.05% | 17.90% |
| XTC1-p29 | (Q10588) ADP-ribosyl cyclase 2 precursor (EC 3.2.2.5) (Cyclic ADP-ribose hydrolase 2) (cADPr hydrolase 2) (Bone marrow stromal antigen 1) (BST-1) (CD157 antigen) | BST1_HUMAN  | 35721  | 100% | 2 | 2 | 3  | 0.03% | 14.20% |
| XTC1-p29 | (Q10588) ADP-ribosyl cyclase 2 precursor (EC 3.2.2.5) (Cyclic ADP-ribose hydrolase 2) (cADPr hydrolase 2) (Bone marrow stromal antigen 1) (BST-1) (CD157 antigen) | BST1_HUMAN  | 35721  | 100% | 2 | 2 | 3  | 0.03% | 9.12%  |
| XTC1-p29 | (Q10588) ADP-ribosyl cyclase 2 precursor (EC 3.2.2.5) (Cyclic ADP-ribose hydrolase 2) (cADPr hydrolase 2) (Bone marrow stromal antigen 1) (BST-1) (CD157 antigen) | BST1_HUMAN  | 35721  | 100% | 4 | 4 | 4  | 0.04% | 20.80% |
| XTC1-p29 | (Q10588) ADP-ribosyl cyclase 2 precursor (EC 3.2.2.5) (Cyclic ADP-ribose hydrolase 2) (cADPr hydrolase 2) (Bone marrow stromal antigen 1) (BST-1) (CD157 antigen) | BST1_HUMAN  | 35721  | 100% | 3 | 3 | 3  | 0.03% | 16.40% |
| XTC1-p29 | (Q10589) Bone marrow stromal antigen 2 (BST-2) (CD317 antigen)                                                                                                    | BST2_HUMAN  | 19751  | 100% | 2 | 2 | 2  | 0.02% | 23.30% |
| XTC1-p29 | (Q12805) EGF-containing fibulin-like extracellular matrix protein 1 precursor (Fibulin-3) (FIBL-3) (Fibrillin-like protein) (Extracellular protein S1-5)          | FBLN3_HUMAN | 54621  | 100% | 3 | 3 | 5  | 0.05% | 11.00% |
| XTC1-p29 | (Q12805) EGF-containing fibulin-like extracellular matrix protein 1 precursor (Fibulin-3) (FIBL-3) (Fibrillin-like protein) (Extracellular protein S1-5)          | FBLN3_HUMAN | 54621  | 100% | 5 | 5 | 6  | 0.05% | 17.60% |
| XTC1-p29 | (Q12805) EGF-containing fibulin-like extracellular matrix protein 1 precursor (Fibulin-3) (FIBL-3) (Fibrillin-like protein) (Extracellular protein S1-5)          | FBLN3_HUMAN | 54621  | 100% | 6 | 6 | 10 | 0.09% | 17.40% |
| XTC1-p29 | (Q12805) EGF-containing fibulin-like extracellular matrix protein 1 precursor (Fibulin-3) (FIBL-3) (Fibrillin-like protein) (Extracellular protein S1-5)          | FBLN3_HUMAN | 54621  | 100% | 4 | 4 | 6  | 0.06% | 20.30% |
| XTC1-p29 | (Q12805) EGF-containing fibulin-like extracellular matrix protein 1 precursor (Fibulin-3) (FIBL-3) (Fibrillin-like protein) (Extracellular protein S1-5)          | FBLN3_HUMAN | 54621  | 100% | 5 | 6 | 6  | 0.05% | 14.40% |
| XTC1-p29 | (Q13308) Tyrosine-protein kinase-like 7 precursor (Colon carcinoma kinase 4) (CCK-4)                                                                              | PTK7_HUMAN  | 118243 | 100% | 2 | 2 | 3  | 0.03% | 3.55%  |
| XTC1-p29 | (Q13308) Tyrosine-protein kinase-like 7 precursor (Colon carcinoma kinase 4) (CCK-4)                                                                              | PTK7_HUMAN  | 118243 | 100% | 2 | 2 | 3  | 0.03% | 4.67%  |

## Protein Identified Sequence Coverage in XTC-1

|          |                                                                                                                                                                                                                                      |             |        |      |   |   |   |       |        |
|----------|--------------------------------------------------------------------------------------------------------------------------------------------------------------------------------------------------------------------------------------|-------------|--------|------|---|---|---|-------|--------|
| XTC1-p29 | (Q13428) Treacle protein (Treacher Collins syndrome protein)                                                                                                                                                                         | TCOF_HUMAN  | 144293 | 100% | 3 | 3 | 3 | 0.03% | 2.98%  |
| XTC1-p29 | (Q13428) Treacle protein (Treacher Collins syndrome protein)                                                                                                                                                                         | TCOF_HUMAN  | 144293 | 100% | 2 | 2 | 2 | 0.02% | 2.27%  |
| XTC1-p29 | (Q13428) Treacle protein (Treacher Collins syndrome protein)                                                                                                                                                                         | TCOF_HUMAN  | 144293 | 100% | 3 | 3 | 3 | 0.03% | 4.46%  |
| XTC1-p29 | (Q13428) Treacle protein (Treacher Collins syndrome protein)                                                                                                                                                                         | TCOF_HUMAN  | 144293 | 100% | 3 | 3 | 5 | 0.04% | 2.98%  |
| XTC1-p29 | (Q13428) Treacle protein (Treacher Collins syndrome protein)                                                                                                                                                                         | TCOF_HUMAN  | 144293 | 100% | 3 | 3 | 4 | 0.04% | 6.09%  |
| XTC1-p29 | (Q13428) Treacle protein (Treacher Collins syndrome protein)                                                                                                                                                                         | TCOF_HUMAN  | 144293 | 100% | 2 | 2 | 2 | 0.02% | 1.70%  |
| XTC1-p29 | (Q13510) Acid ceramidase precursor (EC 3.5.1.23) (Acylsphingosine deacylase) (N-acylsphingosine amidohydrolase) (AC) (Putative 32 kDa heart protein) (PHP32) [Contains: Acid ceramidase alpha subunit; Acid ceramidase beta subunit] | ASAH1_HUMAN | 44633  | 100% | 3 | 3 | 5 | 0.05% | 8.10%  |
| XTC1-p29 | (Q13510) Acid ceramidase precursor (EC 3.5.1.23) (Acylsphingosine deacylase) (N-acylsphingosine amidohydrolase) (AC) (Putative 32 kDa heart protein) (PHP32) [Contains: Acid ceramidase alpha subunit; Acid ceramidase beta subunit] | ASAH1_HUMAN | 44633  | 100% | 2 | 2 | 2 | 0.02% | 8.86%  |
| XTC1-p29 | (Q13510) Acid ceramidase precursor (EC 3.5.1.23) (Acylsphingosine deacylase) (N-acylsphingosine amidohydrolase) (AC) (Putative 32 kDa heart protein) (PHP32) [Contains: Acid ceramidase alpha subunit; Acid ceramidase beta subunit] | ASAH1_HUMAN | 44633  | 100% | 2 | 2 | 4 | 0.04% | 6.84%  |
| XTC1-p29 | (Q13510) Acid ceramidase precursor (EC 3.5.1.23) (Acylsphingosine deacylase) (N-acylsphingosine amidohydrolase) (AC) (Putative 32 kDa heart protein) (PHP32) [Contains: Acid ceramidase alpha subunit; Acid ceramidase beta subunit] | ASAH1_HUMAN | 44633  | 100% | 2 | 2 | 4 | 0.04% | 10.10% |
| XTC1-p29 | (Q13510) Acid ceramidase precursor (EC 3.5.1.23) (Acylsphingosine deacylase) (N-acylsphingosine amidohydrolase) (AC) (Putative 32 kDa heart protein) (PHP32) [Contains: Acid ceramidase alpha subunit; Acid ceramidase beta subunit] | ASAH1_HUMAN | 44633  | 100% | 2 | 2 | 2 | 0.02% | 6.84%  |
| XTC1-p29 | (Q13510) Acid ceramidase precursor (EC 3.5.1.23) (Acylsphingosine deacylase) (N-acylsphingosine amidohydrolase) (AC) (Putative 32 kDa heart protein) (PHP32) [Contains: Acid ceramidase alpha subunit; Acid ceramidase beta subunit] | ASAH1_HUMAN | 44633  | 100% | 4 | 4 | 4 | 0.04% | 12.20% |
| XTC1-p29 | (Q13510) Acid ceramidase precursor (EC 3.5.1.23) (Acylsphingosine deacylase) (N-acylsphingosine amidohydrolase) (AC) (Putative 32 kDa heart protein) (PHP32) [Contains: Acid ceramidase alpha subunit; Acid ceramidase beta subunit] | ASAH1_HUMAN | 44633  | 100% | 2 | 2 | 2 | 0.02% | 8.61%  |

## Protein Identified Sequence Coverage in XTC-1

|          |                                                                                                                                                                                                                                      |             |       |      |   |   |    |       |        |
|----------|--------------------------------------------------------------------------------------------------------------------------------------------------------------------------------------------------------------------------------------|-------------|-------|------|---|---|----|-------|--------|
| XTC1-p29 | (Q13510) Acid ceramidase precursor (EC 3.5.1.23) (Acylsphingosine deacylase) (N-acylsphingosine amidohydrolase) (AC) (Putative 32 kDa heart protein) (PHP32) [Contains: Acid ceramidase alpha subunit; Acid ceramidase beta subunit] | ASAH1_HUMAN | 44633 | 100% | 2 | 2 | 2  | 0.02% | 10.10% |
| XTC1-p29 | (Q13510) Acid ceramidase precursor (EC 3.5.1.23) (Acylsphingosine deacylase) (N-acylsphingosine amidohydrolase) (AC) (Putative 32 kDa heart protein) (PHP32) [Contains: Acid ceramidase alpha subunit; Acid ceramidase beta subunit] | ASAH1_HUMAN | 44633 | 100% | 2 | 2 | 2  | 0.02% | 10.10% |
| XTC1-p29 | (Q13561) Dynactin subunit 2 (Dynactin complex 50 kDa subunit) (50 kDa dynein-associated polypeptide) (p50 dynamitin) (DCTN-50)                                                                                                       | DCTN2_HUMAN | 44083 | 100% | 2 | 2 | 2  | 0.02% | 5.75%  |
| XTC1-p29 | (Q13561) Dynactin subunit 2 (Dynactin complex 50 kDa subunit) (50 kDa dynein-associated polypeptide) (p50 dynamitin) (DCTN-50)                                                                                                       | DCTN2_HUMAN | 44083 | 100% | 3 | 3 | 3  | 0.03% | 8.25%  |
| XTC1-p29 | (Q13561) Dynactin subunit 2 (Dynactin complex 50 kDa subunit) (50 kDa dynein-associated polypeptide) (p50 dynamitin) (DCTN-50)                                                                                                       | DCTN2_HUMAN | 44083 | 100% | 2 | 2 | 3  | 0.03% | 6.00%  |
| XTC1-p29 | (Q13561) Dynactin subunit 2 (Dynactin complex 50 kDa subunit) (50 kDa dynein-associated polypeptide) (p50 dynamitin) (DCTN-50)                                                                                                       | DCTN2_HUMAN | 44083 | 100% | 2 | 2 | 2  | 0.02% | 8.50%  |
| XTC1-p29 | (Q13641) Trophoblast glycoprotein precursor (5T4 oncofetal trophoblast glycoprotein) (5T4 oncotrophoblast glycoprotein) (5T4 oncofetal antigen) (M6P1)                                                                               | TPBG_HUMAN  | 46015 | 100% | 3 | 3 | 3  | 0.03% | 8.81%  |
| XTC1-p29 | (Q13740) CD166 antigen precursor (Activated leukocyte-cell adhesion molecule) (ALCAM)                                                                                                                                                | CD166_HUMAN | 65116 | 100% | 3 | 4 | 6  | 0.06% | 10.50% |
| XTC1-p29 | (Q13740) CD166 antigen precursor (Activated leukocyte-cell adhesion molecule) (ALCAM)                                                                                                                                                | CD166_HUMAN | 65116 | 100% | 3 | 3 | 3  | 0.03% | 11.70% |
| XTC1-p29 | (Q13740) CD166 antigen precursor (Activated leukocyte-cell adhesion molecule) (ALCAM)                                                                                                                                                | CD166_HUMAN | 65116 | 100% | 5 | 6 | 6  | 0.06% | 13.60% |
| XTC1-p29 | (Q13740) CD166 antigen precursor (Activated leukocyte-cell adhesion molecule) (ALCAM)                                                                                                                                                | CD166_HUMAN | 65116 | 100% | 2 | 2 | 4  | 0.04% | 6.86%  |
| XTC1-p29 | (Q13740) CD166 antigen precursor (Activated leukocyte-cell adhesion molecule) (ALCAM)                                                                                                                                                | CD166_HUMAN | 65116 | 100% | 6 | 6 | 8  | 0.07% | 17.00% |
| XTC1-p29 | (Q13740) CD166 antigen precursor (Activated leukocyte-cell adhesion molecule) (ALCAM)                                                                                                                                                | CD166_HUMAN | 65116 | 100% | 4 | 4 | 11 | 0.10% | 12.70% |
| XTC1-p29 | (Q13740) CD166 antigen precursor (Activated leukocyte-cell adhesion molecule) (ALCAM)                                                                                                                                                | CD166_HUMAN | 65116 | 100% | 3 | 3 | 4  | 0.04% | 12.50% |
| XTC1-p29 | (Q13740) CD166 antigen precursor (Activated leukocyte-cell adhesion molecule) (ALCAM)                                                                                                                                                | CD166_HUMAN | 65116 | 100% | 7 | 7 | 8  | 0.07% | 20.40% |
| XTC1-p29 | (Q13740) CD166 antigen precursor (Activated leukocyte-cell adhesion molecule) (ALCAM)                                                                                                                                                | CD166_HUMAN | 65116 | 100% | 4 | 4 | 7  | 0.06% | 10.60% |
| XTC1-p29 | (Q13740) CD166 antigen precursor (Activated leukocyte-cell adhesion molecule) (ALCAM)                                                                                                                                                | CD166_HUMAN | 65116 | 100% | 4 | 4 | 5  | 0.05% | 16.00% |
| XTC1-p29 | (Q13740) CD166 antigen precursor (Activated leukocyte-cell adhesion molecule) (ALCAM)                                                                                                                                                | CD166_HUMAN | 65116 | 100% | 4 | 4 | 4  | 0.03% | 9.61%  |
| XTC1-p29 | (Q13740) CD166 antigen precursor (Activated leukocyte-cell adhesion molecule) (ALCAM)                                                                                                                                                | CD166_HUMAN | 65116 | 100% | 2 | 3 | 3  | 0.03% | 6.35%  |
| XTC1-p29 | (Q13740) CD166 antigen precursor (Activated leukocyte-cell adhesion molecule) (ALCAM)                                                                                                                                                | CD166_HUMAN | 65116 | 100% | 3 | 5 | 13 | 0.11% | 12.50% |

## Protein Identified Sequence Coverage in XTC-1

|          |                                                                                                                                                                         |             |        |      |    |    |    |       |        |
|----------|-------------------------------------------------------------------------------------------------------------------------------------------------------------------------|-------------|--------|------|----|----|----|-------|--------|
| XTC1-p29 | (Q13740) CD166 antigen precursor (Activated leukocyte-cell adhesion molecule) (ALCAM)                                                                                   | CD166_HUMAN | 65116  | 100% | 2  | 2  | 6  | 0.05% | 8.75%  |
| XTC1-p29 | (Q14126) Desmoglein-2 precursor (HDGC)                                                                                                                                  | DSG2_HUMAN  | 122367 | 100% | 3  | 3  | 4  | 0.04% | 5.55%  |
| XTC1-p29 | (Q14126) Desmoglein-2 precursor (HDGC)                                                                                                                                  | DSG2_HUMAN  | 122367 | 100% | 3  | 3  | 4  | 0.04% | 5.55%  |
| XTC1-p29 | (Q14126) Desmoglein-2 precursor (HDGC)                                                                                                                                  | DSG2_HUMAN  | 122367 | 100% | 2  | 2  | 8  | 0.07% | 2.69%  |
| XTC1-p29 | (Q14126) Desmoglein-2 precursor (HDGC)                                                                                                                                  | DSG2_HUMAN  | 122367 | 100% | 2  | 2  | 4  | 0.04% | 2.69%  |
| XTC1-p29 | (Q14157) Ubiquitin-associated protein 2-like                                                                                                                            | UBP2L_HUMAN | 103912 | 100% | 2  | 2  | 2  | 0.02% | 5.70%  |
| XTC1-p29 | (Q14508) WAP four-disulfide core domain protein 2 precursor (Major epididymis-specific protein E4) (Epididymal secretory protein E4) (Putative protease inhibitor WAP5) | WFDC2_HUMAN | 12974  | 100% | 2  | 2  | 5  | 0.05% | 27.40% |
| XTC1-p29 | (Q14508) WAP four-disulfide core domain protein 2 precursor (Major epididymis-specific protein E4) (Epididymal secretory protein E4) (Putative protease inhibitor WAP5) | WFDC2_HUMAN | 12974  | 100% | 2  | 2  | 4  | 0.04% | 27.40% |
| XTC1-p29 | (Q14508) WAP four-disulfide core domain protein 2 precursor (Major epididymis-specific protein E4) (Epididymal secretory protein E4) (Putative protease inhibitor WAP5) | WFDC2_HUMAN | 12974  | 100% | 2  | 3  | 4  | 0.04% | 27.40% |
| XTC1-p29 | (Q14508) WAP four-disulfide core domain protein 2 precursor (Major epididymis-specific protein E4) (Epididymal secretory protein E4) (Putative protease inhibitor WAP5) | WFDC2_HUMAN | 12974  | 100% | 3  | 4  | 7  | 0.06% | 27.40% |
| XTC1-p29 | (Q14508) WAP four-disulfide core domain protein 2 precursor (Major epididymis-specific protein E4) (Epididymal secretory protein E4) (Putative protease inhibitor WAP5) | WFDC2_HUMAN | 12974  | 100% | 2  | 3  | 7  | 0.06% | 27.40% |
| XTC1-p29 | (Q15084) Protein disulfide-isomerase A6 precursor (EC 5.3.4.1) (Protein disulfide isomerase P5) (Thioredoxin domain-containing protein 7)                               | PDIA6_HUMAN | 48104  | 100% | 9  | 11 | 19 | 0.18% | 28.60% |
| XTC1-p29 | (Q15084) Protein disulfide-isomerase A6 precursor (EC 5.3.4.1) (Protein disulfide isomerase P5) (Thioredoxin domain-containing protein 7)                               | PDIA6_HUMAN | 48104  | 100% | 6  | 7  | 14 | 0.13% | 23.60% |
| XTC1-p29 | (Q15084) Protein disulfide-isomerase A6 precursor (EC 5.3.4.1) (Protein disulfide isomerase P5) (Thioredoxin domain-containing protein 7)                               | PDIA6_HUMAN | 48104  | 100% | 10 | 12 | 21 | 0.19% | 37.00% |
| XTC1-p29 | (Q15084) Protein disulfide-isomerase A6 precursor (EC 5.3.4.1) (Protein disulfide isomerase P5) (Thioredoxin domain-containing protein 7)                               | PDIA6_HUMAN | 48104  | 100% | 11 | 12 | 20 | 0.18% | 40.50% |
| XTC1-p29 | (Q15084) Protein disulfide-isomerase A6 precursor (EC 5.3.4.1) (Protein disulfide isomerase P5) (Thioredoxin domain-containing protein 7)                               | PDIA6_HUMAN | 48104  | 100% | 7  | 7  | 12 | 0.11% | 23.90% |
| XTC1-p29 | (Q15084) Protein disulfide-isomerase A6 precursor (EC 5.3.4.1) (Protein disulfide isomerase P5) (Thioredoxin domain-containing protein 7)                               | PDIA6_HUMAN | 48104  | 100% | 4  | 4  | 7  | 0.07% | 17.00% |
| XTC1-p29 | (Q15084) Protein disulfide-isomerase A6 precursor (EC 5.3.4.1) (Protein disulfide isomerase P5) (Thioredoxin domain-containing protein 7)                               | PDIA6_HUMAN | 48104  | 100% | 7  | 9  | 16 | 0.14% | 27.70% |

Protein Identified Sequence Coverage in XTC-1

|          |                                                                                                                                                                                                   |             |        |      |   |   |    |       |        |
|----------|---------------------------------------------------------------------------------------------------------------------------------------------------------------------------------------------------|-------------|--------|------|---|---|----|-------|--------|
| XTC1-p29 | (Q15084) Protein disulfide-isomerase A6 precursor (EC 5.3.4.1) (Protein disulfide isomerase P5) (Thioredoxin domain-containing protein 7)                                                         | PDIA6_HUMAN | 48104  | 100% | 2 | 3 | 4  | 0.03% | 11.10% |
| XTC1-p29 | (Q15084) Protein disulfide-isomerase A6 precursor (EC 5.3.4.1) (Protein disulfide isomerase P5) (Thioredoxin domain-containing protein 7)                                                         | PDIA6_HUMAN | 48104  | 100% | 2 | 4 | 11 | 0.09% | 8.64%  |
| XTC1-p29 | (Q15084) Protein disulfide-isomerase A6 precursor (EC 5.3.4.1) (Protein disulfide isomerase P5) (Thioredoxin domain-containing protein 7)                                                         | PDIA6_HUMAN | 48104  | 100% | 2 | 2 | 2  | 0.02% | 10.90% |
| XTC1-p29 | (Q15262) Receptor-type tyrosine-protein phosphatase kappa precursor (EC 3.1.3.48) (Protein-tyrosine phosphatase kappa) (R-PTP-kappa)                                                              | PTPRK_HUMAN | 162071 | 100% | 2 | 2 | 2  | 0.02% | 2.08%  |
| XTC1-p29 | (Q15262) Receptor-type tyrosine-protein phosphatase kappa precursor (EC 3.1.3.48) (Protein-tyrosine phosphatase kappa) (R-PTP-kappa)                                                              | PTPRK_HUMAN | 162071 | 100% | 4 | 4 | 4  | 0.04% | 3.96%  |
| XTC1-p29 | (Q15262) Receptor-type tyrosine-protein phosphatase kappa precursor (EC 3.1.3.48) (Protein-tyrosine phosphatase kappa) (R-PTP-kappa)                                                              | PTPRK_HUMAN | 162071 | 100% | 2 | 2 | 2  | 0.02% | 2.78%  |
| XTC1-p29 | (Q15262) Receptor-type tyrosine-protein phosphatase kappa precursor (EC 3.1.3.48) (Protein-tyrosine phosphatase kappa) (R-PTP-kappa)                                                              | PTPRK_HUMAN | 162071 | 100% | 3 | 3 | 3  | 0.03% | 2.99%  |
| XTC1-p29 | (Q16270) Insulin-like growth factor-binding protein 7 precursor (IGFBP-7) (IBP-7) (IGF-binding protein 7) (MAC25 protein) (Prostacyclin-stimulating factor) (PGI2-stimulating factor) (IGFBP-rP1) | IBP7_HUMAN  | 29112  | 100% | 4 | 5 | 10 | 0.09% | 23.40% |
| XTC1-p29 | (Q16270) Insulin-like growth factor-binding protein 7 precursor (IGFBP-7) (IBP-7) (IGF-binding protein 7) (MAC25 protein) (Prostacyclin-stimulating factor) (PGI2-stimulating factor) (IGFBP-rP1) | IBP7_HUMAN  | 29112  | 100% | 6 | 9 | 17 | 0.16% | 35.10% |
| XTC1-p29 | (Q16270) Insulin-like growth factor-binding protein 7 precursor (IGFBP-7) (IBP-7) (IGF-binding protein 7) (MAC25 protein) (Prostacyclin-stimulating factor) (PGI2-stimulating factor) (IGFBP-rP1) | IBP7_HUMAN  | 29112  | 100% | 4 | 5 | 6  | 0.05% | 22.30% |
| XTC1-p29 | (Q16270) Insulin-like growth factor-binding protein 7 precursor (IGFBP-7) (IBP-7) (IGF-binding protein 7) (MAC25 protein) (Prostacyclin-stimulating factor) (PGI2-stimulating factor) (IGFBP-rP1) | IBP7_HUMAN  | 29112  | 100% | 7 | 9 | 14 | 0.13% | 35.10% |
| XTC1-p29 | (Q16270) Insulin-like growth factor-binding protein 7 precursor (IGFBP-7) (IBP-7) (IGF-binding protein 7) (MAC25 protein) (Prostacyclin-stimulating factor) (PGI2-stimulating factor) (IGFBP-rP1) | IBP7_HUMAN  | 29112  | 100% | 4 | 4 | 9  | 0.08% | 21.60% |

## Protein Identified Sequence Coverage in XTC-1

|          |                                                                                                                                                                                                   |                |       |      |   |   |    |       |        |
|----------|---------------------------------------------------------------------------------------------------------------------------------------------------------------------------------------------------|----------------|-------|------|---|---|----|-------|--------|
| XTC1-p29 | (Q16270) Insulin-like growth factor-binding protein 7 precursor (IGFBP-7) (IBP-7) (IGF-binding protein 7) (MAC25 protein) (Prostacyclin-stimulating factor) (PGI2-stimulating factor) (IGFBP-rP1) | IBP7_HUMAN     | 29112 | 100% | 3 | 3 | 5  | 0.05% | 13.80% |
| XTC1-p29 | (Q16270) Insulin-like growth factor-binding protein 7 precursor (IGFBP-7) (IBP-7) (IGF-binding protein 7) (MAC25 protein) (Prostacyclin-stimulating factor) (PGI2-stimulating factor) (IGFBP-rP1) | IBP7_HUMAN     | 29112 | 100% | 3 | 3 | 5  | 0.04% | 14.90% |
| XTC1-p29 | (Q16610) Extracellular matrix protein 1 precursor (Secretory component p85)                                                                                                                       | ECM1_HUMAN     | 60655 | 100% | 2 | 2 | 2  | 0.02% | 8.89%  |
| XTC1-p29 | (Q16651) Prostaticin precursor (EC 3.4.21.-) [Contains: Prostaticin light chain; Prostaticin heavy chain]                                                                                         | PRSS8_HUMAN    | 36413 | 100% | 2 | 2 | 2  | 0.02% | 15.20% |
| XTC1-p29 | (Q16881) Thioredoxin reductase 1, cytoplasmic precursor (EC 1.8.1.9) (TR) (TR1)                                                                                                                   | TRXR1_HUMAN    | 54689 | 100% | 3 | 3 | 5  | 0.05% | 14.80% |
| XTC1-p29 | (Q16881) Thioredoxin reductase 1, cytoplasmic precursor (EC 1.8.1.9) (TR) (TR1)                                                                                                                   | TRXR1_HUMAN    | 54689 | 100% | 2 | 2 | 3  | 0.03% | 7.62%  |
| XTC1-p29 | (Q16881) Thioredoxin reductase 1, cytoplasmic precursor (EC 1.8.1.9) (TR) (TR1)                                                                                                                   | TRXR1_HUMAN    | 54689 | 100% | 5 | 5 | 5  | 0.04% | 20.20% |
| XTC1-p29 | (Q16881) Thioredoxin reductase 1, cytoplasmic precursor (EC 1.8.1.9) (TR) (TR1)                                                                                                                   | TRXR1_HUMAN    | 54689 | 100% | 3 | 3 | 3  | 0.03% | 10.00% |
| XTC1-p29 | (Q16881) Thioredoxin reductase 1, cytoplasmic precursor (EC 1.8.1.9) (TR) (TR1)                                                                                                                   | TRXR1_HUMAN    | 54689 | 100% | 2 | 2 | 4  | 0.04% | 10.60% |
| XTC1-p29 | (Q16881) Thioredoxin reductase 1, cytoplasmic precursor (EC 1.8.1.9) (TR) (TR1)                                                                                                                   | TRXR1_HUMAN    | 54689 | 100% | 2 | 2 | 2  | 0.02% | 9.22%  |
| XTC1-p29 | (Q16881) Thioredoxin reductase 1, cytoplasmic precursor (EC 1.8.1.9) (TR) (TR1)                                                                                                                   | TRXR1_HUMAN    | 54689 | 100% | 2 | 2 | 4  | 0.03% | 8.02%  |
| XTC1-p29 | (Q16881) Thioredoxin reductase 1, cytoplasmic precursor (EC 1.8.1.9) (TR) (TR1)                                                                                                                   | TRXR1_HUMAN    | 54689 | 100% | 2 | 2 | 2  | 0.02% | 12.40% |
| XTC1-p29 | (Q16881) Thioredoxin reductase 1, cytoplasmic precursor (EC 1.8.1.9) (TR) (TR1)                                                                                                                   | TRXR1_HUMAN    | 54689 | 100% | 2 | 2 | 5  | 0.04% | 11.80% |
| XTC1-p29 | (Q5ZPR3) CD276 antigen precursor (Costimulatory molecule) (B7 homolog 3) (B7-H3) (4Ig-B7-H3)                                                                                                      | CD276_HUMAN    | 57216 | 100% | 3 | 3 | 3  | 0.03% | 9.18%  |
| XTC1-p29 | (Q5ZPR3) CD276 antigen precursor (Costimulatory molecule) (B7 homolog 3) (B7-H3) (4Ig-B7-H3)                                                                                                      | CD276_HUMAN    | 57216 | 100% | 3 | 4 | 5  | 0.05% | 9.18%  |
| XTC1-p29 | (Q5ZPR3) CD276 antigen precursor (Costimulatory molecule) (B7 homolog 3) (B7-H3) (4Ig-B7-H3)                                                                                                      | CD276_HUMAN    | 57216 | 100% | 2 | 2 | 4  | 0.04% | 5.62%  |
| XTC1-p29 | (Q6EMK4) Vascularin precursor (Protein Slit-like 2)                                                                                                                                               | VASN_HUMAN     | 71696 | 100% | 2 | 2 | 3  | 0.03% | 5.94%  |
| XTC1-p29 | (Q6EMK4) Vascularin precursor (Protein Slit-like 2)                                                                                                                                               | VASN_HUMAN     | 71696 | 100% | 2 | 2 | 2  | 0.02% | 5.94%  |
| XTC1-p29 | (Q6EMK4) Vascularin precursor (Protein Slit-like 2)                                                                                                                                               | VASN_HUMAN     | 71696 | 100% | 2 | 2 | 5  | 0.05% | 5.94%  |
| XTC1-p29 | (Q6EMK4) Vascularin precursor (Protein Slit-like 2)                                                                                                                                               | VASN_HUMAN     | 71696 | 100% | 5 | 5 | 8  | 0.07% | 12.00% |
| XTC1-p29 | (Q6EMK4) Vascularin precursor (Protein Slit-like 2)                                                                                                                                               | VASN_HUMAN     | 71696 | 100% | 4 | 4 | 6  | 0.06% | 9.96%  |
| XTC1-p29 | (Q6EMK4) Vascularin precursor (Protein Slit-like 2)                                                                                                                                               | VASN_HUMAN     | 71696 | 100% | 2 | 2 | 5  | 0.05% | 6.39%  |
| XTC1-p29 | (Q6EMK4) Vascularin precursor (Protein Slit-like 2)                                                                                                                                               | VASN_HUMAN     | 71696 | 100% | 6 | 7 | 13 | 0.12% | 13.70% |
| XTC1-p29 | (Q6EMK4) Vascularin precursor (Protein Slit-like 2)                                                                                                                                               | VASN_HUMAN     | 71696 | 100% | 2 | 2 | 4  | 0.04% | 3.42%  |
| XTC1-p29 | (Q6EMK4) Vascularin precursor (Protein Slit-like 2)                                                                                                                                               | VASN_HUMAN     | 71696 | 100% | 2 | 2 | 3  | 0.03% | 3.71%  |
| XTC1-p29 | (Q6EMK4) Vascularin precursor (Protein Slit-like 2)                                                                                                                                               | VASN_HUMAN     | 71696 | 100% | 2 | 3 | 29 | 0.25% | 9.81%  |
| XTC1-p29 | (Q6F113) Histone H2A type 2-A (H2A.2)                                                                                                                                                             | H2A2A_HUMAN,H2 | 13840 | 100% | 2 | 3 | 9  | 0.08% | 35.90% |
| XTC1-p29 | (Q6F113) Histone H2A type 2-A (H2A.2)                                                                                                                                                             | H2A2A_HUMAN,H2 | 13840 | 100% | 2 | 3 | 7  | 0.06% | 35.90% |
| XTC1-p29 | (Q6F113) Histone H2A type 2-A (H2A.2)                                                                                                                                                             | H2A2A_HUMAN,H2 | 13840 | 100% | 2 | 3 | 19 | 0.17% | 35.90% |

## Protein Identified Sequence Coverage in XTC-1

|          |                                                                                                                                                       |                |        |      |   |   |    |       |        |
|----------|-------------------------------------------------------------------------------------------------------------------------------------------------------|----------------|--------|------|---|---|----|-------|--------|
| XTC1-p29 | (Q6F113) Histone H2A type 2-A (H2A.2)                                                                                                                 | H2A2A_HUMAN,H2 | 13840  | 100% | 2 | 3 | 15 | 0.13% | 35.90% |
| XTC1-p29 | (Q6F113) Histone H2A type 2-A (H2A.2)                                                                                                                 | H2A2A_HUMAN,H2 | 13840  | 100% | 2 | 3 | 12 | 0.11% | 23.40% |
| XTC1-p29 | (Q6F113) Histone H2A type 2-A (H2A.2)                                                                                                                 | H2A2A_HUMAN,H2 | 13947  | 100% | 2 | 3 | 9  | 0.08% | 44.20% |
| XTC1-p29 | (Q6F113) Histone H2A type 2-A (H2A.2)                                                                                                                 | H2A2A_HUMAN,H2 | 13840  | 100% | 2 | 3 | 78 | 0.66% | 44.50% |
| XTC1-p29 | (Q6F113) Histone H2A type 2-A (H2A.2)                                                                                                                 | H2A2A_HUMAN,H2 | 13947  | 100% | 2 | 3 | 8  | 0.07% | 37.20% |
| XTC1-p29 | (Q81WA5) Choline transporter-like protein 2 (Solute carrier family 44 member 2)                                                                       | CTL2_HUMAN     | 80138  | 100% | 2 | 2 | 2  | 0.02% | 3.54%  |
| XTC1-p29 | (Q81WA5) Choline transporter-like protein 2 (Solute carrier family 44 member 2)                                                                       | CTL2_HUMAN     | 80138  | 100% | 2 | 2 | 3  | 0.03% | 3.54%  |
| XTC1-p29 | (Q81WA5) Choline transporter-like protein 2 (Solute carrier family 44 member 2)                                                                       | CTL2_HUMAN     | 80138  | 100% | 2 | 2 | 4  | 0.04% | 3.54%  |
| XTC1-p29 | (Q81YB3) Serine/arginine repetitive matrix protein 1 (Ser/Arg-related nuclear matrix protein) (SR-related nuclear matrix protein of 160 kDa) (SRm160) | SRRM1_HUMAN    | 102319 | 100% | 3 | 4 | 8  | 0.07% | 4.65%  |
| XTC1-p29 | (Q81YB3) Serine/arginine repetitive matrix protein 1 (Ser/Arg-related nuclear matrix protein) (SR-related nuclear matrix protein of 160 kDa) (SRm160) | SRRM1_HUMAN    | 102319 | 100% | 4 | 6 | 10 | 0.09% | 8.41%  |
| XTC1-p29 | (Q81YB3) Serine/arginine repetitive matrix protein 1 (Ser/Arg-related nuclear matrix protein) (SR-related nuclear matrix protein of 160 kDa) (SRm160) | SRRM1_HUMAN    | 102319 | 100% | 4 | 5 | 10 | 0.09% | 8.41%  |
| XTC1-p29 | (Q81YB3) Serine/arginine repetitive matrix protein 1 (Ser/Arg-related nuclear matrix protein) (SR-related nuclear matrix protein of 160 kDa) (SRm160) | SRRM1_HUMAN    | 102319 | 100% | 3 | 4 | 6  | 0.05% | 4.65%  |
| XTC1-p29 | (Q81YB3) Serine/arginine repetitive matrix protein 1 (Ser/Arg-related nuclear matrix protein) (SR-related nuclear matrix protein of 160 kDa) (SRm160) | SRRM1_HUMAN    | 102319 | 100% | 3 | 4 | 8  | 0.07% | 4.65%  |
| XTC1-p29 | (Q81YB3) Serine/arginine repetitive matrix protein 1 (Ser/Arg-related nuclear matrix protein) (SR-related nuclear matrix protein of 160 kDa) (SRm160) | SRRM1_HUMAN    | 102319 | 100% | 2 | 3 | 5  | 0.04% | 5.86%  |
| XTC1-p29 | (Q81ZP9) G-protein coupled receptor 64 precursor (Epididymis-specific protein 6) (He6 receptor)                                                       | GPR64_HUMAN    | 111476 | 100% | 2 | 4 | 4  | 0.04% | 3.54%  |
| XTC1-p29 | (Q81ZP9) G-protein coupled receptor 64 precursor (Epididymis-specific protein 6) (He6 receptor)                                                       | GPR64_HUMAN    | 111476 | 100% | 2 | 2 | 2  | 0.02% | 3.15%  |
| XTC1-p29 | (Q81ZP9) G-protein coupled receptor 64 precursor (Epididymis-specific protein 6) (He6 receptor)                                                       | GPR64_HUMAN    | 111476 | 100% | 2 | 2 | 2  | 0.02% | 3.64%  |
| XTC1-p29 | (Q8NB7) Sulfatase-modifying factor 2 precursor (C-alpha-formylglycine-generating enzyme 2)                                                            | SUMF2_HUMAN    | 33839  | 100% | 6 | 7 | 11 | 0.10% | 27.90% |
| XTC1-p29 | (Q8NB7) Sulfatase-modifying factor 2 precursor (C-alpha-formylglycine-generating enzyme 2)                                                            | SUMF2_HUMAN    | 33839  | 100% | 7 | 8 | 19 | 0.18% | 31.60% |
| XTC1-p29 | (Q8NB7) Sulfatase-modifying factor 2 precursor (C-alpha-formylglycine-generating enzyme 2)                                                            | SUMF2_HUMAN    | 33839  | 100% | 2 | 3 | 5  | 0.05% | 8.97%  |
| XTC1-p29 | (Q8NB7) Sulfatase-modifying factor 2 precursor (C-alpha-formylglycine-generating enzyme 2)                                                            | SUMF2_HUMAN    | 33839  | 100% | 7 | 8 | 14 | 0.13% | 32.20% |
| XTC1-p29 | (Q8NB7) Sulfatase-modifying factor 2 precursor (C-alpha-formylglycine-generating enzyme 2)                                                            | SUMF2_HUMAN    | 33839  | 100% | 5 | 6 | 13 | 0.12% | 23.90% |
| XTC1-p29 | (Q8NB7) Sulfatase-modifying factor 2 precursor (C-alpha-formylglycine-generating enzyme 2)                                                            | SUMF2_HUMAN    | 33839  | 100% | 2 | 2 | 5  | 0.04% | 8.64%  |
| XTC1-p29 | (Q8NB7) Sulfatase-modifying factor 2 precursor (C-alpha-formylglycine-generating enzyme 2)                                                            | SUMF2_HUMAN    | 33839  | 100% | 2 | 3 | 9  | 0.08% | 8.97%  |

## Protein Identified Sequence Coverage in XTC-1

|          |                                                                                                                                                                 |             |         |      |   |   |   |       |        |
|----------|-----------------------------------------------------------------------------------------------------------------------------------------------------------------|-------------|---------|------|---|---|---|-------|--------|
| XTC1-p29 | (Q8NBS9) Thioredoxin domain-containing protein 5 precursor (Thioredoxin-like protein p46) (Endoplasmic reticulum protein ERp46)                                 | TXND5_HUMAN | 47611   | 100% | 3 | 3 | 4 | 0.04% | 9.03%  |
| XTC1-p29 | (Q8NBS9) Thioredoxin domain-containing protein 5 precursor (Thioredoxin-like protein p46) (Endoplasmic reticulum protein ERp46)                                 | TXND5_HUMAN | 47611   | 100% | 3 | 3 | 3 | 0.03% | 9.03%  |
| XTC1-p29 | (Q8NBS9) Thioredoxin domain-containing protein 5 precursor (Thioredoxin-like protein p46) (Endoplasmic reticulum protein ERp46)                                 | TXND5_HUMAN | 47611   | 100% | 8 | 8 | 9 | 0.08% | 23.40% |
| XTC1-p29 | (Q8NBS9) Thioredoxin domain-containing protein 5 precursor (Thioredoxin-like protein p46) (Endoplasmic reticulum protein ERp46)                                 | TXND5_HUMAN | 47611   | 100% | 4 | 4 | 7 | 0.06% | 10.60% |
| XTC1-p29 | (Q8NBS9) Thioredoxin domain-containing protein 5 precursor (Thioredoxin-like protein p46) (Endoplasmic reticulum protein ERp46)                                 | TXND5_HUMAN | 47611   | 100% | 2 | 3 | 5 | 0.04% | 12.00% |
| XTC1-p29 | (Q8NBX0) Probable saccharopine dehydrogenase (EC 1.5.1.9)                                                                                                       | SCPDH_HUMAN | 47135   | 100% | 2 | 2 | 2 | 0.02% | 13.30% |
| XTC1-p29 | (Q8NCC3) 1-O-acylceramide synthase precursor (EC 2.3.1.-) (ACS) (Lysosomal phospholipase A2) (Lysophospholipase 3) (LPLA2) (LCAT-like lysophospholipase) (LLPL) | LYPA3_HUMAN | 46641   | 100% | 2 | 2 | 2 | 0.02% | 10.20% |
| XTC1-p29 | (Q8NCC3) 1-O-acylceramide synthase precursor (EC 2.3.1.-) (ACS) (Lysosomal phospholipase A2) (Lysophospholipase 3) (LPLA2) (LCAT-like lysophospholipase) (LLPL) | LYPA3_HUMAN | 46641   | 100% | 2 | 2 | 4 | 0.04% | 10.20% |
| XTC1-p29 | (Q8NCC3) 1-O-acylceramide synthase precursor (EC 2.3.1.-) (ACS) (Lysosomal phospholipase A2) (Lysophospholipase 3) (LPLA2) (LCAT-like lysophospholipase) (LLPL) | LYPA3_HUMAN | 46641   | 100% | 2 | 2 | 2 | 0.02% | 6.07%  |
| XTC1-p29 | (Q8TCT9) Minor histocompatibility antigen H13 (EC 3.4.99.-) (Signal peptide peptidase) (Presenilin-like protein 3) (hIMP1 protein)                              | HM13_HUMAN  | 41473   | 100% | 2 | 2 | 5 | 0.05% | 9.02%  |
| XTC1-p29 | (Q8TCT9) Minor histocompatibility antigen H13 (EC 3.4.99.-) (Signal peptide peptidase) (Presenilin-like protein 3) (hIMP1 protein)                              | HM13_HUMAN  | 41473   | 100% | 2 | 2 | 2 | 0.02% | 9.02%  |
| XTC1-p29 | (Q8TCT9) Minor histocompatibility antigen H13 (EC 3.4.99.-) (Signal peptide peptidase) (Presenilin-like protein 3) (hIMP1 protein)                              | HM13_HUMAN  | 41473   | 100% | 2 | 2 | 6 | 0.05% | 9.02%  |
| XTC1-p29 | (Q8WZ42) Titin (EC 2.7.11.1) (Connectin) (Rhabdomyosarcoma antigen MU-RMS-40.14)                                                                                | TITIN_HUMAN | 3815832 | 100% | 2 | 2 | 2 | 0.02% | 0.04%  |
| XTC1-p29 | (Q92485) Acid sphingomyelinase-like phosphodiesterase 3b precursor (EC 3.1.4.-) (ASM-like phosphodiesterase 3b)                                                 | ASM3B_HUMAN | 50796   | 100% | 3 | 3 | 3 | 0.03% | 10.10% |
| XTC1-p29 | (Q92485) Acid sphingomyelinase-like phosphodiesterase 3b precursor (EC 3.1.4.-) (ASM-like phosphodiesterase 3b)                                                 | ASM3B_HUMAN | 50796   | 100% | 4 | 4 | 7 | 0.06% | 15.20% |
| XTC1-p29 | (Q92485) Acid sphingomyelinase-like phosphodiesterase 3b precursor (EC 3.1.4.-) (ASM-like phosphodiesterase 3b)                                                 | ASM3B_HUMAN | 50796   | 100% | 2 | 2 | 4 | 0.04% | 6.59%  |
| XTC1-p29 | (Q92485) Acid sphingomyelinase-like phosphodiesterase 3b precursor (EC 3.1.4.-) (ASM-like phosphodiesterase 3b)                                                 | ASM3B_HUMAN | 50796   | 100% | 4 | 4 | 5 | 0.04% | 15.20% |
| XTC1-p29 | (Q92485) Acid sphingomyelinase-like phosphodiesterase 3b precursor (EC 3.1.4.-) (ASM-like phosphodiesterase 3b)                                                 | ASM3B_HUMAN | 50796   | 100% | 5 | 5 | 7 | 0.06% | 16.00% |



## Protein Identified Sequence Coverage in XTC-1

|          |                                                                                                                            |             |       |      |   |    |    |       |        |
|----------|----------------------------------------------------------------------------------------------------------------------------|-------------|-------|------|---|----|----|-------|--------|
| XTC1-p29 | (Q92485) Acid sphingomyelinase-like phosphodiesterase 3b precursor (EC 3.1.4.-) (ASM-like phosphodiesterase 3b)            | ASM3B_HUMAN | 50796 | 100% | 2 | 2  | 3  | 0.03% | 10.10% |
| XTC1-p29 | (Q92485) Acid sphingomyelinase-like phosphodiesterase 3b precursor (EC 3.1.4.-) (ASM-like phosphodiesterase 3b)            | ASM3B_HUMAN | 50796 | 100% | 2 | 2  | 2  | 0.02% | 6.15%  |
| XTC1-p29 | (Q92485) Acid sphingomyelinase-like phosphodiesterase 3b precursor (EC 3.1.4.-) (ASM-like phosphodiesterase 3b)            | ASM3B_HUMAN | 50796 | 100% | 2 | 3  | 3  | 0.03% | 7.03%  |
| XTC1-p29 | (Q92485) Acid sphingomyelinase-like phosphodiesterase 3b precursor (EC 3.1.4.-) (ASM-like phosphodiesterase 3b)            | ASM3B_HUMAN | 50796 | 100% | 2 | 2  | 2  | 0.02% | 7.69%  |
| XTC1-p29 | (Q92520) Protein FAM3C precursor (Protein GS3786)                                                                          | FAM3C_HUMAN | 24663 | 100% | 2 | 2  | 2  | 0.02% | 15.40% |
| XTC1-p29 | (Q92692) Poliovirus receptor-related protein 2 precursor (Herpes virus entry mediator B) (HveB) (Nectin-2) (CD112 antigen) | PVRL2_HUMAN | 57724 | 100% | 2 | 2  | 2  | 0.02% | 6.88%  |
| XTC1-p29 | (Q92820) Gamma-glutamyl hydrolase precursor (EC 3.4.19.9) (Gamma-Glu-X carboxypeptidase) (Conjugase) (GH)                  | GGH_HUMAN   | 35948 | 100% | 3 | 3  | 3  | 0.03% | 14.80% |
| XTC1-p29 | (Q92820) Gamma-glutamyl hydrolase precursor (EC 3.4.19.9) (Gamma-Glu-X carboxypeptidase) (Conjugase) (GH)                  | GGH_HUMAN   | 35948 | 100% | 3 | 3  | 3  | 0.03% | 13.50% |
| XTC1-p29 | (Q92820) Gamma-glutamyl hydrolase precursor (EC 3.4.19.9) (Gamma-Glu-X carboxypeptidase) (Conjugase) (GH)                  | GGH_HUMAN   | 35948 | 100% | 6 | 8  | 14 | 0.13% | 26.70% |
| XTC1-p29 | (Q92820) Gamma-glutamyl hydrolase precursor (EC 3.4.19.9) (Gamma-Glu-X carboxypeptidase) (Conjugase) (GH)                  | GGH_HUMAN   | 35948 | 100% | 6 | 7  | 15 | 0.14% | 27.40% |
| XTC1-p29 | (Q92820) Gamma-glutamyl hydrolase precursor (EC 3.4.19.9) (Gamma-Glu-X carboxypeptidase) (Conjugase) (GH)                  | GGH_HUMAN   | 35948 | 100% | 4 | 7  | 13 | 0.12% | 19.80% |
| XTC1-p29 | (Q92820) Gamma-glutamyl hydrolase precursor (EC 3.4.19.9) (Gamma-Glu-X carboxypeptidase) (Conjugase) (GH)                  | GGH_HUMAN   | 35948 | 100% | 8 | 10 | 21 | 0.19% | 34.90% |
| XTC1-p29 | (Q92820) Gamma-glutamyl hydrolase precursor (EC 3.4.19.9) (Gamma-Glu-X carboxypeptidase) (Conjugase) (GH)                  | GGH_HUMAN   | 35948 | 100% | 8 | 10 | 24 | 0.21% | 35.80% |
| XTC1-p29 | (Q92820) Gamma-glutamyl hydrolase precursor (EC 3.4.19.9) (Gamma-Glu-X carboxypeptidase) (Conjugase) (GH)                  | GGH_HUMAN   | 35948 | 100% | 4 | 4  | 5  | 0.04% | 13.80% |
| XTC1-p29 | (Q92820) Gamma-glutamyl hydrolase precursor (EC 3.4.19.9) (Gamma-Glu-X carboxypeptidase) (Conjugase) (GH)                  | GGH_HUMAN   | 35948 | 100% | 2 | 3  | 12 | 0.10% | 14.80% |
| XTC1-p29 | (Q92820) Gamma-glutamyl hydrolase precursor (EC 3.4.19.9) (Gamma-Glu-X carboxypeptidase) (Conjugase) (GH)                  | GGH_HUMAN   | 35948 | 100% | 2 | 3  | 11 | 0.09% | 9.12%  |
| XTC1-p29 | (Q92820) Gamma-glutamyl hydrolase precursor (EC 3.4.19.9) (Gamma-Glu-X carboxypeptidase) (Conjugase) (GH)                  | GGH_HUMAN   | 35948 | 100% | 2 | 4  | 7  | 0.06% | 8.49%  |
| XTC1-p29 | (Q92820) Gamma-glutamyl hydrolase precursor (EC 3.4.19.9) (Gamma-Glu-X carboxypeptidase) (Conjugase) (GH)                  | GGH_HUMAN   | 35948 | 100% | 2 | 3  | 8  | 0.07% | 11.30% |

## Protein Identified Sequence Coverage in XTC-1

|          |                                                                                                                                                                                  |             |        |      |   |    |     |       |        |
|----------|----------------------------------------------------------------------------------------------------------------------------------------------------------------------------------|-------------|--------|------|---|----|-----|-------|--------|
| XTC1-p29 | (Q92820) Gamma-glutamyl hydrolase precursor (EC 3.4.19.9) (Gamma-Glu-X carboxypeptidase) (Conjugase) (GH)                                                                        | GGH_HUMAN   | 35948  | 100% | 2 | 2  | 2   | 0.02% | 11.30% |
| XTC1-p29 | (Q92876) Kallikrein-6 precursor (EC 3.4.21.-) (Protease M) (Neurosin) (Zyme) (SP59)                                                                                              | KLK6_HUMAN  | 26838  | 100% | 2 | 2  | 2   | 0.02% | 16.40% |
| XTC1-p29 | (Q92876) Kallikrein-6 precursor (EC 3.4.21.-) (Protease M) (Neurosin) (Zyme) (SP59)                                                                                              | KLK6_HUMAN  | 26838  | 100% | 2 | 2  | 3   | 0.03% | 10.20% |
| XTC1-p29 | (Q92876) Kallikrein-6 precursor (EC 3.4.21.-) (Protease M) (Neurosin) (Zyme) (SP59)                                                                                              | KLK6_HUMAN  | 26838  | 100% | 2 | 2  | 2   | 0.02% | 16.40% |
| XTC1-p29 | (Q92896) Golgi apparatus protein 1 precursor (Golgi sialoglycoprotein MG-160) (E-selectin ligand 1) (ESL1) (Cysteine-rich fibroblast growth factor receptor) (CFR-1)             | GSLG1_HUMAN | 134577 | 100% | 2 | 2  | 2   | 0.02% | 2.12%  |
| XTC1-p29 | (Q92896) Golgi apparatus protein 1 precursor (Golgi sialoglycoprotein MG-160) (E-selectin ligand 1) (ESL1) (Cysteine-rich fibroblast growth factor receptor) (CFR-1)             | GSLG1_HUMAN | 134577 | 100% | 2 | 2  | 2   | 0.02% | 4.50%  |
| XTC1-p29 | (Q92896) Golgi apparatus protein 1 precursor (Golgi sialoglycoprotein MG-160) (E-selectin ligand 1) (ESL1) (Cysteine-rich fibroblast growth factor receptor) (CFR-1)             | GSLG1_HUMAN | 134577 | 100% | 3 | 3  | 4   | 0.03% | 4.58%  |
| XTC1-p29 | (Q93079) Histone H2B.j (H2B/j)                                                                                                                                                   | H2BJ_HUMAN  | 13743  | 100% | 3 | 3  | 4   | 0.04% | 24.80% |
| XTC1-p29 | (Q93079) Histone H2B.j (H2B/j)                                                                                                                                                   | H2BJ_HUMAN  | 13743  | 100% | 5 | 5  | 8   | 0.08% | 47.20% |
| XTC1-p29 | (Q93079) Histone H2B.j (H2B/j)                                                                                                                                                   | H2BJ_HUMAN  | 13743  | 100% | 6 | 6  | 13  | 0.12% | 45.60% |
| XTC1-p29 | (Q93079) Histone H2B.j (H2B/j)                                                                                                                                                   | H2BJ_HUMAN  | 13743  | 100% | 5 | 6  | 13  | 0.12% | 38.40% |
| XTC1-p29 | (Q93079) Histone H2B.j (H2B/j)                                                                                                                                                   | H2BJ_HUMAN  | 13743  | 100% | 5 | 5  | 40  | 0.37% | 42.40% |
| XTC1-p29 | (Q93079) Histone H2B.j (H2B/j)                                                                                                                                                   | H2BJ_HUMAN  | 13743  | 100% | 4 | 5  | 37  | 0.34% | 32.80% |
| XTC1-p29 | (Q93079) Histone H2B.j (H2B/j)                                                                                                                                                   | H2BJ_HUMAN  | 13743  | 100% | 4 | 4  | 52  | 0.48% | 33.60% |
| XTC1-p29 | (Q93079) Histone H2B.j (H2B/j)                                                                                                                                                   | H2BJ_HUMAN  | 13743  | 100% | 5 | 6  | 61  | 0.55% | 41.60% |
| XTC1-p29 | (Q93079) Histone H2B.j (H2B/j)                                                                                                                                                   | H2BJ_HUMAN  | 13743  | 100% | 2 | 2  | 67  | 0.59% | 20.00% |
| XTC1-p29 | (Q93079) Histone H2B.j (H2B/j)                                                                                                                                                   | H2BJ_HUMAN  | 13743  | 100% | 2 | 3  | 30  | 0.26% | 20.80% |
| XTC1-p29 | (Q93079) Histone H2B.j (H2B/j)                                                                                                                                                   | H2BJ_HUMAN  | 13743  | 100% | 2 | 3  | 154 | 1.31% | 19.20% |
| XTC1-p29 | (Q93079) Histone H2B.j (H2B/j)                                                                                                                                                   | H2BJ_HUMAN  | 13743  | 100% | 3 | 3  | 23  | 0.20% | 28.00% |
| XTC1-p29 | (Q969H8) Protein C19orf10 precursor (Stromal cell-derived growth factor SF20) (Interleukin-25) (IL-25)                                                                           | CS010_HUMAN | 18777  | 100% | 2 | 2  | 2   | 0.02% | 12.10% |
| XTC1-p29 | (Q969H8) Protein C19orf10 precursor (Stromal cell-derived growth factor SF20) (Interleukin-25) (IL-25)                                                                           | CS010_HUMAN | 18777  | 100% | 2 | 2  | 4   | 0.04% | 15.60% |
| XTC1-p29 | (Q96AY3) FK506-binding protein 10 precursor (EC 5.2.1.8) (Peptidyl-prolyl cis-trans isomerase) (PPIase) (Rotamase) (65 kDa FK506-binding protein) (FKBP65) (Immunophilin FKBP65) | FKB10_HUMAN | 64228  | 100% | 5 | 5  | 6   | 0.06% | 13.90% |
| XTC1-p29 | (Q96AY3) FK506-binding protein 10 precursor (EC 5.2.1.8) (Peptidyl-prolyl cis-trans isomerase) (PPIase) (Rotamase) (65 kDa FK506-binding protein) (FKBP65) (Immunophilin FKBP65) | FKB10_HUMAN | 64228  | 100% | 5 | 5  | 5   | 0.05% | 17.90% |
| XTC1-p29 | (Q96AY3) FK506-binding protein 10 precursor (EC 5.2.1.8) (Peptidyl-prolyl cis-trans isomerase) (PPIase) (Rotamase) (65 kDa FK506-binding protein) (FKBP65) (Immunophilin FKBP65) | FKB10_HUMAN | 64228  | 100% | 7 | 10 | 11  | 0.10% | 21.30% |
| XTC1-p29 | (Q96AY3) FK506-binding protein 10 precursor (EC 5.2.1.8) (Peptidyl-prolyl cis-trans isomerase) (PPIase) (Rotamase) (65 kDa FK506-binding protein) (FKBP65) (Immunophilin FKBP65) | FKB10_HUMAN | 64228  | 100% | 4 | 4  | 7   | 0.06% | 7.73%  |

## Protein Identified Sequence Coverage in XTC-1

|          |                                                                                                                                                                                  |             |       |      |    |    |    |       |        |
|----------|----------------------------------------------------------------------------------------------------------------------------------------------------------------------------------|-------------|-------|------|----|----|----|-------|--------|
| XTC1-p29 | (Q96AY3) FK506-binding protein 10 precursor (EC 5.2.1.8) (Peptidyl-prolyl cis-trans isomerase) (PPIase) (Rotamase) (65 kDa FK506-binding protein) (FKBP65) (Immunophilin FKBP65) | FKB10_HUMAN | 64228 | 100% | 5  | 5  | 6  | 0.06% | 13.70% |
| XTC1-p29 | (Q96AY3) FK506-binding protein 10 precursor (EC 5.2.1.8) (Peptidyl-prolyl cis-trans isomerase) (PPIase) (Rotamase) (65 kDa FK506-binding protein) (FKBP65) (Immunophilin FKBP65) | FKB10_HUMAN | 64228 | 100% | 6  | 6  | 8  | 0.07% | 20.80% |
| XTC1-p29 | (Q96AY3) FK506-binding protein 10 precursor (EC 5.2.1.8) (Peptidyl-prolyl cis-trans isomerase) (PPIase) (Rotamase) (65 kDa FK506-binding protein) (FKBP65) (Immunophilin FKBP65) | FKB10_HUMAN | 64228 | 100% | 5  | 5  | 7  | 0.06% | 17.20% |
| XTC1-p29 | (Q96AY3) FK506-binding protein 10 precursor (EC 5.2.1.8) (Peptidyl-prolyl cis-trans isomerase) (PPIase) (Rotamase) (65 kDa FK506-binding protein) (FKBP65) (Immunophilin FKBP65) | FKB10_HUMAN | 64228 | 100% | 2  | 2  | 2  | 0.02% | 7.04%  |
| XTC1-p29 | (Q96AY3) FK506-binding protein 10 precursor (EC 5.2.1.8) (Peptidyl-prolyl cis-trans isomerase) (PPIase) (Rotamase) (65 kDa FK506-binding protein) (FKBP65) (Immunophilin FKBP65) | FKB10_HUMAN | 64228 | 100% | 2  | 2  | 3  | 0.03% | 9.79%  |
| XTC1-p29 | (Q96HE7) ERO1-like protein alpha precursor (EC 1.8.4.-) (ERO1-Lalpha) (Oxidoreductin-1-Lalpha) (Endoplasmic oxidoreductin-1-like protein) (ERO1-L)                               | ERO1A_HUMAN | 54377 | 100% | 2  | 2  | 2  | 0.02% | 2.56%  |
| XTC1-p29 | (Q96HE7) ERO1-like protein alpha precursor (EC 1.8.4.-) (ERO1-Lalpha) (Oxidoreductin-1-Lalpha) (Endoplasmic oxidoreductin-1-like protein) (ERO1-L)                               | ERO1A_HUMAN | 54377 | 100% | 10 | 11 | 19 | 0.18% | 26.70% |
| XTC1-p29 | (Q96HE7) ERO1-like protein alpha precursor (EC 1.8.4.-) (ERO1-Lalpha) (Oxidoreductin-1-Lalpha) (Endoplasmic oxidoreductin-1-like protein) (ERO1-L)                               | ERO1A_HUMAN | 54377 | 100% | 13 | 13 | 23 | 0.21% | 39.10% |
| XTC1-p29 | (Q96HE7) ERO1-like protein alpha precursor (EC 1.8.4.-) (ERO1-Lalpha) (Oxidoreductin-1-Lalpha) (Endoplasmic oxidoreductin-1-like protein) (ERO1-L)                               | ERO1A_HUMAN | 54377 | 100% | 7  | 7  | 14 | 0.13% | 26.50% |
| XTC1-p29 | (Q96HE7) ERO1-like protein alpha precursor (EC 1.8.4.-) (ERO1-Lalpha) (Oxidoreductin-1-Lalpha) (Endoplasmic oxidoreductin-1-like protein) (ERO1-L)                               | ERO1A_HUMAN | 54377 | 100% | 12 | 13 | 21 | 0.19% | 32.70% |
| XTC1-p29 | (Q96HE7) ERO1-like protein alpha precursor (EC 1.8.4.-) (ERO1-Lalpha) (Oxidoreductin-1-Lalpha) (Endoplasmic oxidoreductin-1-like protein) (ERO1-L)                               | ERO1A_HUMAN | 54377 | 100% | 12 | 12 | 21 | 0.19% | 31.00% |
| XTC1-p29 | (Q96HE7) ERO1-like protein alpha precursor (EC 1.8.4.-) (ERO1-Lalpha) (Oxidoreductin-1-Lalpha) (Endoplasmic oxidoreductin-1-like protein) (ERO1-L)                               | ERO1A_HUMAN | 54377 | 100% | 5  | 5  | 7  | 0.07% | 21.40% |
| XTC1-p29 | (Q96HE7) ERO1-like protein alpha precursor (EC 1.8.4.-) (ERO1-Lalpha) (Oxidoreductin-1-Lalpha) (Endoplasmic oxidoreductin-1-like protein) (ERO1-L)                               | ERO1A_HUMAN | 54377 | 100% | 7  | 7  | 11 | 0.09% | 17.70% |

## Protein Identified Sequence Coverage in XTC-1

|          |                                                                                                                                                                                                                  |                |       |      |    |    |    |       |        |
|----------|------------------------------------------------------------------------------------------------------------------------------------------------------------------------------------------------------------------|----------------|-------|------|----|----|----|-------|--------|
| XTC1-p29 | (Q96HE7) ERO1-like protein alpha precursor (EC 1.8.4.-) (ERO1-Lalpha) (Oxidoreductin-1-Lalpha) (Endoplasmic oxidoreductin-1-like protein) (ERO1-L)                                                               | ERO1A_HUMAN    | 54377 | 100% | 4  | 7  | 12 | 0.10% | 17.30% |
| XTC1-p29 | (Q96HE7) ERO1-like protein alpha precursor (EC 1.8.4.-) (ERO1-Lalpha) (Oxidoreductin-1-Lalpha) (Endoplasmic oxidoreductin-1-like protein) (ERO1-L)                                                               | ERO1A_HUMAN    | 54377 | 100% | 3  | 3  | 6  | 0.05% | 15.20% |
| XTC1-p29 | (Q96HE7) ERO1-like protein alpha precursor (EC 1.8.4.-) (ERO1-Lalpha) (Oxidoreductin-1-Lalpha) (Endoplasmic oxidoreductin-1-like protein) (ERO1-L)                                                               | ERO1A_HUMAN    | 54377 | 100% | 2  | 2  | 2  | 0.02% | 5.98%  |
| XTC1-p29 | (Q96KP4) Cytosolic nonspecific dipeptidase (Glutamate carboxypeptidase-like protein 1) (CNDP dipeptidase 2)                                                                                                      | CPGL1_HUMAN    | 52862 | 100% | 2  | 2  | 2  | 0.02% | 8.63%  |
| XTC1-p29 | (Q96KP4) Cytosolic nonspecific dipeptidase (Glutamate carboxypeptidase-like protein 1) (CNDP dipeptidase 2)                                                                                                      | CPGL1_HUMAN    | 52862 | 100% | 3  | 4  | 5  | 0.04% | 12.60% |
| XTC1-p29 | (Q96PD2) Discoidin, CUB and LCCL domain-containing protein 2 precursor (Endothelial and smooth muscle cell-derived neuropilin-like protein) (CUB, LCCL and coagulation factor V/VIII-homology domains protein 1) | DCBD2_HUMAN    | 85018 | 100% | 2  | 2  | 2  | 0.02% | 6.84%  |
| XTC1-p29 | (Q96QV6) Histone H2A type 1-A                                                                                                                                                                                    | H2A1A_HUMAN,H2 | 14996 | 100% | 2  | 2  | 2  | 0.02% | 32.40% |
| XTC1-p29 | (Q96QV6) Histone H2A type 1-A                                                                                                                                                                                    | H2A1A_HUMAN,H2 | 14996 | 100% | 2  | 2  | 2  | 0.02% | 32.40% |
| XTC1-p29 | (Q99519) Sialidase-1 precursor (EC 3.2.1.18) (Lysosomal sialidase) (N-acetyl-alpha-neuraminidase 1) (Acetylneuraminyl hydrolase) (G9 sialidase)                                                                  | NEUR1_HUMAN    | 45449 | 100% | 2  | 2  | 2  | 0.02% | 7.47%  |
| XTC1-p29 | (Q99519) Sialidase-1 precursor (EC 3.2.1.18) (Lysosomal sialidase) (N-acetyl-alpha-neuraminidase 1) (Acetylneuraminyl hydrolase) (G9 sialidase)                                                                  | NEUR1_HUMAN    | 45449 | 100% | 9  | 9  | 15 | 0.14% | 25.50% |
| XTC1-p29 | (Q99519) Sialidase-1 precursor (EC 3.2.1.18) (Lysosomal sialidase) (N-acetyl-alpha-neuraminidase 1) (Acetylneuraminyl hydrolase) (G9 sialidase)                                                                  | NEUR1_HUMAN    | 45449 | 100% | 9  | 10 | 20 | 0.18% | 35.40% |
| XTC1-p29 | (Q99519) Sialidase-1 precursor (EC 3.2.1.18) (Lysosomal sialidase) (N-acetyl-alpha-neuraminidase 1) (Acetylneuraminyl hydrolase) (G9 sialidase)                                                                  | NEUR1_HUMAN    | 45449 | 100% | 4  | 5  | 8  | 0.07% | 24.10% |
| XTC1-p29 | (Q99519) Sialidase-1 precursor (EC 3.2.1.18) (Lysosomal sialidase) (N-acetyl-alpha-neuraminidase 1) (Acetylneuraminyl hydrolase) (G9 sialidase)                                                                  | NEUR1_HUMAN    | 45449 | 100% | 10 | 10 | 17 | 0.15% | 34.20% |
| XTC1-p29 | (Q99519) Sialidase-1 precursor (EC 3.2.1.18) (Lysosomal sialidase) (N-acetyl-alpha-neuraminidase 1) (Acetylneuraminyl hydrolase) (G9 sialidase)                                                                  | NEUR1_HUMAN    | 45449 | 100% | 8  | 9  | 20 | 0.18% | 22.90% |
| XTC1-p29 | (Q99519) Sialidase-1 precursor (EC 3.2.1.18) (Lysosomal sialidase) (N-acetyl-alpha-neuraminidase 1) (Acetylneuraminyl hydrolase) (G9 sialidase)                                                                  | NEUR1_HUMAN    | 45449 | 100% | 3  | 3  | 6  | 0.06% | 23.90% |

## Protein Identified Sequence Coverage in XTC-1

|          |                                                                                                                                                                                                                                         |             |        |      |   |   |    |       |        |
|----------|-----------------------------------------------------------------------------------------------------------------------------------------------------------------------------------------------------------------------------------------|-------------|--------|------|---|---|----|-------|--------|
| XTC1-p29 | (Q99519) Sialidase-1 precursor (EC 3.2.1.18)<br>(Lysosomal sialidase) (N-acetyl-alpha-neuraminidase 1) (Acetylneuraminyl hydrolase) (G9 sialidase)                                                                                      | NEUR1_HUMAN | 45449  | 100% | 6 | 6 | 8  | 0.07% | 32.80% |
| XTC1-p29 | (Q99519) Sialidase-1 precursor (EC 3.2.1.18)<br>(Lysosomal sialidase) (N-acetyl-alpha-neuraminidase 1) (Acetylneuraminyl hydrolase) (G9 sialidase)                                                                                      | NEUR1_HUMAN | 45449  | 100% | 4 | 4 | 4  | 0.03% | 27.50% |
| XTC1-p29 | (Q99519) Sialidase-1 precursor (EC 3.2.1.18)<br>(Lysosomal sialidase) (N-acetyl-alpha-neuraminidase 1) (Acetylneuraminyl hydrolase) (G9 sialidase)                                                                                      | NEUR1_HUMAN | 45449  | 100% | 2 | 2 | 2  | 0.02% | 12.80% |
| XTC1-p29 | (Q99519) Sialidase-1 precursor (EC 3.2.1.18)<br>(Lysosomal sialidase) (N-acetyl-alpha-neuraminidase 1) (Acetylneuraminyl hydrolase) (G9 sialidase)                                                                                      | NEUR1_HUMAN | 45449  | 100% | 3 | 4 | 8  | 0.07% | 21.70% |
| XTC1-p29 | (Q99519) Sialidase-1 precursor (EC 3.2.1.18)<br>(Lysosomal sialidase) (N-acetyl-alpha-neuraminidase 1) (Acetylneuraminyl hydrolase) (G9 sialidase)                                                                                      | NEUR1_HUMAN | 45449  | 100% | 2 | 2 | 10 | 0.09% | 17.80% |
| XTC1-p29 | (Q99538) Legumain precursor (EC 3.4.22.34)<br>(Asparaginyl endopeptidase) (Protease, cysteine 1)                                                                                                                                        | LGMN_HUMAN  | 49393  | 100% | 2 | 2 | 3  | 0.03% | 10.20% |
| XTC1-p29 | (Q99538) Legumain precursor (EC 3.4.22.34)<br>(Asparaginyl endopeptidase) (Protease, cysteine 1)                                                                                                                                        | LGMN_HUMAN  | 49393  | 100% | 3 | 3 | 4  | 0.04% | 11.50% |
| XTC1-p29 | (Q99538) Legumain precursor (EC 3.4.22.34)<br>(Asparaginyl endopeptidase) (Protease, cysteine 1)                                                                                                                                        | LGMN_HUMAN  | 49393  | 100% | 2 | 2 | 2  | 0.02% | 8.31%  |
| XTC1-p29 | (Q99538) Legumain precursor (EC 3.4.22.34)<br>(Asparaginyl endopeptidase) (Protease, cysteine 1)                                                                                                                                        | LGMN_HUMAN  | 49393  | 100% | 2 | 2 | 2  | 0.02% | 8.31%  |
| XTC1-p29 | (Q99715) Collagen alpha-1(XII) chain precursor                                                                                                                                                                                          | COCA1_HUMAN | 333174 | 100% | 2 | 2 | 3  | 0.03% | 0.82%  |
| XTC1-p29 | (Q99715) Collagen alpha-1(XII) chain precursor                                                                                                                                                                                          | COCA1_HUMAN | 333174 | 100% | 3 | 3 | 3  | 0.03% | 1.57%  |
| XTC1-p29 | (Q99715) Collagen alpha-1(XII) chain precursor                                                                                                                                                                                          | COCA1_HUMAN | 333174 | 100% | 3 | 3 | 3  | 0.03% | 1.57%  |
| XTC1-p29 | (Q99715) Collagen alpha-1(XII) chain precursor                                                                                                                                                                                          | COCA1_HUMAN | 333174 | 100% | 2 | 2 | 3  | 0.03% | 1.24%  |
| XTC1-p29 | (Q99715) Collagen alpha-1(XII) chain precursor                                                                                                                                                                                          | COCA1_HUMAN | 333174 | 100% | 8 | 8 | 8  | 0.07% | 4.54%  |
| XTC1-p29 | (Q99715) Collagen alpha-1(XII) chain precursor                                                                                                                                                                                          | COCA1_HUMAN | 333174 | 100% | 3 | 3 | 4  | 0.03% | 2.45%  |
| XTC1-p29 | (Q99757) Thioredoxin, mitochondrial precursor (Mt-Trx) (MTRX) (Thioredoxin-2)                                                                                                                                                           | THIOM_HUMAN | 18365  | 100% | 2 | 2 | 2  | 0.02% | 21.70% |
| XTC1-p29 | (Q99988) Growth/differentiation factor 15 precursor (GDF-15) (Placental bone morphogenic protein) (Placental TGF-beta) (Macrophage inhibitory cytokine 1) (MIC-1) (Prostate differentiation factor) (NSAID-regulated protein 1) (NRG-1) | GDF15_HUMAN | 34151  | 100% | 2 | 2 | 2  | 0.02% | 13.00% |
| XTC1-p29 | (Q99988) Growth/differentiation factor 15 precursor (GDF-15) (Placental bone morphogenic protein) (Placental TGF-beta) (Macrophage inhibitory cytokine 1) (MIC-1) (Prostate differentiation factor) (NSAID-regulated protein 1) (NRG-1) | GDF15_HUMAN | 34151  | 100% | 2 | 2 | 3  | 0.03% | 10.40% |

## Protein Identified Sequence Coverage in XTC-1

|          |                                                                                                                                                                                                                                         |             |       |      |   |   |   |       |        |
|----------|-----------------------------------------------------------------------------------------------------------------------------------------------------------------------------------------------------------------------------------------|-------------|-------|------|---|---|---|-------|--------|
| XTC1-p29 | (Q99988) Growth/differentiation factor 15 precursor (GDF-15) (Placental bone morphogenic protein) (Placental TGF-beta) (Macrophage inhibitory cytokine 1) (MIC-1) (Prostate differentiation factor) (NSAID-regulated protein 1) (NRG-1) | GDF15_HUMAN | 34151 | 100% | 2 | 2 | 2 | 0.02% | 13.00% |
| XTC1-p29 | (Q99988) Growth/differentiation factor 15 precursor (GDF-15) (Placental bone morphogenic protein) (Placental TGF-beta) (Macrophage inhibitory cytokine 1) (MIC-1) (Prostate differentiation factor) (NSAID-regulated protein 1) (NRG-1) | GDF15_HUMAN | 34151 | 100% | 2 | 2 | 2 | 0.02% | 13.00% |
| XTC1-p29 | (Q9BS26) Thioredoxin domain-containing protein 4 precursor (Endoplasmic reticulum resident protein ERp44)                                                                                                                               | TXND4_HUMAN | 46955 | 100% | 2 | 2 | 3 | 0.03% | 13.10% |
| XTC1-p29 | (Q9H173) Nucleotide exchange factor SIL1 precursor (BiP-associated protein) (BAP)                                                                                                                                                       | SIL1_HUMAN  | 52068 | 100% | 2 | 2 | 2 | 0.02% | 5.64%  |
| XTC1-p29 | (Q9H173) Nucleotide exchange factor SIL1 precursor (BiP-associated protein) (BAP)                                                                                                                                                       | SIL1_HUMAN  | 52068 | 100% | 2 | 2 | 2 | 0.02% | 5.42%  |
| XTC1-p29 | (Q9H3G5) Probable serine carboxypeptidase CPVL precursor (EC 3.4.16.-) (Carboxypeptidase, vitellogenic-like) (Vitellogenic carboxypeptidase-like protein) (VCP-like protein) (HVLP)                                                     | CPVL_HUMAN  | 54148 | 100% | 2 | 2 | 3 | 0.03% | 5.88%  |
| XTC1-p29 | (Q9H3G5) Probable serine carboxypeptidase CPVL precursor (EC 3.4.16.-) (Carboxypeptidase, vitellogenic-like) (Vitellogenic carboxypeptidase-like protein) (VCP-like protein) (HVLP)                                                     | CPVL_HUMAN  | 54148 | 100% | 2 | 2 | 2 | 0.02% | 9.45%  |
| XTC1-p29 | (Q9H3G5) Probable serine carboxypeptidase CPVL precursor (EC 3.4.16.-) (Carboxypeptidase, vitellogenic-like) (Vitellogenic carboxypeptidase-like protein) (VCP-like protein) (HVLP)                                                     | CPVL_HUMAN  | 54148 | 100% | 2 | 2 | 2 | 0.02% | 4.83%  |
| XTC1-p29 | (Q9H3G5) Probable serine carboxypeptidase CPVL precursor (EC 3.4.16.-) (Carboxypeptidase, vitellogenic-like) (Vitellogenic carboxypeptidase-like protein) (VCP-like protein) (HVLP)                                                     | CPVL_HUMAN  | 54148 | 100% | 4 | 5 | 5 | 0.05% | 13.70% |
| XTC1-p29 | (Q9H3G5) Probable serine carboxypeptidase CPVL precursor (EC 3.4.16.-) (Carboxypeptidase, vitellogenic-like) (Vitellogenic carboxypeptidase-like protein) (VCP-like protein) (HVLP)                                                     | CPVL_HUMAN  | 54148 | 100% | 4 | 4 | 5 | 0.04% | 7.56%  |
| XTC1-p29 | (Q9H3G5) Probable serine carboxypeptidase CPVL precursor (EC 3.4.16.-) (Carboxypeptidase, vitellogenic-like) (Vitellogenic carboxypeptidase-like protein) (VCP-like protein) (HVLP)                                                     | CPVL_HUMAN  | 54148 | 100% | 4 | 4 | 5 | 0.04% | 8.82%  |
| XTC1-p29 | (Q9H3G5) Probable serine carboxypeptidase CPVL precursor (EC 3.4.16.-) (Carboxypeptidase, vitellogenic-like) (Vitellogenic carboxypeptidase-like protein) (VCP-like protein) (HVLP)                                                     | CPVL_HUMAN  | 54148 | 100% | 2 | 2 | 2 | 0.02% | 5.04%  |

## Protein Identified Sequence Coverage in XTC-1

|          |                                                                                                                                                                                                                    |            |        |      |   |   |   |       |        |
|----------|--------------------------------------------------------------------------------------------------------------------------------------------------------------------------------------------------------------------|------------|--------|------|---|---|---|-------|--------|
| XTC1-p29 | (Q9HAT2) Sialate O-acetyltransferase precursor (EC 3.1.1.53) (Sialic acid-specific 9-O-acetyltransferase) (H-Lse)                                                                                                  | SIAE_HUMAN | 58297  | 100% | 2 | 3 | 3 | 0.03% | 6.88%  |
| XTC1-p29 | (Q9HAT2) Sialate O-acetyltransferase precursor (EC 3.1.1.53) (Sialic acid-specific 9-O-acetyltransferase) (H-Lse)                                                                                                  | SIAE_HUMAN | 58297  | 100% | 3 | 3 | 3 | 0.03% | 8.22%  |
| XTC1-p29 | (Q9HAT2) Sialate O-acetyltransferase precursor (EC 3.1.1.53) (Sialic acid-specific 9-O-acetyltransferase) (H-Lse)                                                                                                  | SIAE_HUMAN | 58297  | 100% | 3 | 4 | 5 | 0.05% | 6.69%  |
| XTC1-p29 | (Q9HAT2) Sialate O-acetyltransferase precursor (EC 3.1.1.53) (Sialic acid-specific 9-O-acetyltransferase) (H-Lse)                                                                                                  | SIAE_HUMAN | 58297  | 100% | 3 | 4 | 6 | 0.05% | 8.22%  |
| XTC1-p29 | (Q9HAT2) Sialate O-acetyltransferase precursor (EC 3.1.1.53) (Sialic acid-specific 9-O-acetyltransferase) (H-Lse)                                                                                                  | SIAE_HUMAN | 58297  | 100% | 3 | 3 | 4 | 0.04% | 6.31%  |
| XTC1-p29 | (Q9HAT2) Sialate O-acetyltransferase precursor (EC 3.1.1.53) (Sialic acid-specific 9-O-acetyltransferase) (H-Lse)                                                                                                  | SIAE_HUMAN | 58297  | 100% | 6 | 6 | 9 | 0.08% | 16.60% |
| XTC1-p29 | (Q9HAT2) Sialate O-acetyltransferase precursor (EC 3.1.1.53) (Sialic acid-specific 9-O-acetyltransferase) (H-Lse)                                                                                                  | SIAE_HUMAN | 58297  | 100% | 2 | 2 | 3 | 0.03% | 5.16%  |
| XTC1-p29 | (Q9HAT2) Sialate O-acetyltransferase precursor (EC 3.1.1.53) (Sialic acid-specific 9-O-acetyltransferase) (H-Lse)                                                                                                  | SIAE_HUMAN | 58297  | 100% | 3 | 3 | 5 | 0.04% | 7.84%  |
| XTC1-p29 | (Q9NQC3) Reticulon-4 (Neurite outgrowth inhibitor) (Nogo protein) (Focoen) (Neuroendocrine-specific protein) (NSP) (Neuroendocrine-specific protein C homolog) (RTN-x) (Reticulon-5)                               | RTN4_HUMAN | 129917 | 100% | 2 | 2 | 3 | 0.03% | 4.87%  |
| XTC1-p29 | (Q9P0L0) Vesicle-associated membrane protein-associated protein A (VAMP-associated protein A) (VAMP-A) (VAP-A) (33 kDa Vamp-associated protein) (VAP-33)                                                           | VAPA_HUMAN | 27300  | 100% | 2 | 2 | 3 | 0.03% | 13.60% |
| XTC1-p29 | (Q9P0L0) Vesicle-associated membrane protein-associated protein A (VAMP-associated protein A) (VAMP-A) (VAP-A) (33 kDa Vamp-associated protein) (VAP-33)                                                           | VAPA_HUMAN | 27300  | 100% | 2 | 3 | 3 | 0.03% | 11.60% |
| XTC1-p29 | (Q9P0L0) Vesicle-associated membrane protein-associated protein A (VAMP-associated protein A) (VAMP-A) (VAP-A) (33 kDa Vamp-associated protein) (VAP-33)                                                           | VAPA_HUMAN | 27300  | 100% | 2 | 2 | 3 | 0.03% | 13.60% |
| XTC1-p29 | (Q9P2B2) Prostaglandin F2 receptor negative regulator precursor (Prostaglandin F2-alpha receptor regulatory protein) (Prostaglandin F2-alpha receptor-associated protein) (CD9 partner 1) (CD9P-1) (CD315 antigen) | FPRP_HUMAN | 98538  | 100% | 3 | 3 | 3 | 0.03% | 6.71%  |
| XTC1-p29 | (Q9P2B2) Prostaglandin F2 receptor negative regulator precursor (Prostaglandin F2-alpha receptor regulatory protein) (Prostaglandin F2-alpha receptor-associated protein) (CD9 partner 1) (CD9P-1) (CD315 antigen) | FPRP_HUMAN | 98538  | 100% | 2 | 2 | 2 | 0.02% | 2.84%  |

## Protein Identified Sequence Coverage in XTC-1

|          |                                                                                                                                                                                                                    |             |        |      |   |   |   |       |       |
|----------|--------------------------------------------------------------------------------------------------------------------------------------------------------------------------------------------------------------------|-------------|--------|------|---|---|---|-------|-------|
| XTC1-p29 | (Q9P2B2) Prostaglandin F2 receptor negative regulator precursor (Prostaglandin F2-alpha receptor regulatory protein) (Prostaglandin F2-alpha receptor-associated protein) (CD9 partner 1) (CD9P-1) (CD315 antigen) | FPRP_HUMAN  | 98538  | 100% | 2 | 2 | 2 | 0.02% | 2.28% |
| XTC1-p29 | (Q9P2B2) Prostaglandin F2 receptor negative regulator precursor (Prostaglandin F2-alpha receptor regulatory protein) (Prostaglandin F2-alpha receptor-associated protein) (CD9 partner 1) (CD9P-1) (CD315 antigen) | FPRP_HUMAN  | 98538  | 100% | 2 | 2 | 3 | 0.03% | 2.39% |
| XTC1-p29 | (Q9P2E9) Ribosome-binding protein 1 (Ribosome receptor protein) (180 kDa ribosome receptor homolog) (ES/130-related protein)                                                                                       | RRBP1_HUMAN | 152453 | 100% | 4 | 4 | 7 | 0.06% | 4.33% |
| XTC1-p29 | (Q9P2E9) Ribosome-binding protein 1 (Ribosome receptor protein) (180 kDa ribosome receptor homolog) (ES/130-related protein)                                                                                       | RRBP1_HUMAN | 152453 | 100% | 2 | 2 | 2 | 0.02% | 2.98% |
| XTC1-p29 | (Q9P2E9) Ribosome-binding protein 1 (Ribosome receptor protein) (180 kDa ribosome receptor homolog) (ES/130-related protein)                                                                                       | RRBP1_HUMAN | 152453 | 100% | 2 | 2 | 2 | 0.02% | 1.84% |
| XTC1-p29 | (Q9P2E9) Ribosome-binding protein 1 (Ribosome receptor protein) (180 kDa ribosome receptor homolog) (ES/130-related protein)                                                                                       | RRBP1_HUMAN | 152453 | 100% | 2 | 2 | 2 | 0.02% | 1.35% |
| XTC1-p29 | (Q9UBG0) Macrophage mannose receptor 2 precursor (Urokinase receptor-associated protein) (Endocytic receptor 180) (CD280 antigen)                                                                                  | MRC2_HUMAN  | 166637 | 100% | 2 | 2 | 3 | 0.03% | 2.84% |
| XTC1-p29 | (Q9UBG0) Macrophage mannose receptor 2 precursor (Urokinase receptor-associated protein) (Endocytic receptor 180) (CD280 antigen)                                                                                  | MRC2_HUMAN  | 166637 | 100% | 2 | 2 | 2 | 0.02% | 2.84% |
| XTC1-p29 | (Q9UBG0) Macrophage mannose receptor 2 precursor (Urokinase receptor-associated protein) (Endocytic receptor 180) (CD280 antigen)                                                                                  | MRC2_HUMAN  | 166637 | 100% | 2 | 2 | 4 | 0.04% | 2.84% |
| XTC1-p29 | (Q9UBG0) Macrophage mannose receptor 2 precursor (Urokinase receptor-associated protein) (Endocytic receptor 180) (CD280 antigen)                                                                                  | MRC2_HUMAN  | 166637 | 100% | 2 | 2 | 3 | 0.03% | 1.69% |
| XTC1-p29 | (Q9UBG0) Macrophage mannose receptor 2 precursor (Urokinase receptor-associated protein) (Endocytic receptor 180) (CD280 antigen)                                                                                  | MRC2_HUMAN  | 166637 | 100% | 5 | 5 | 5 | 0.05% | 7.78% |
| XTC1-p29 | (Q9UBG0) Macrophage mannose receptor 2 precursor (Urokinase receptor-associated protein) (Endocytic receptor 180) (CD280 antigen)                                                                                  | MRC2_HUMAN  | 166637 | 100% | 4 | 4 | 5 | 0.05% | 6.83% |
| XTC1-p29 | (Q9UBG0) Macrophage mannose receptor 2 precursor (Urokinase receptor-associated protein) (Endocytic receptor 180) (CD280 antigen)                                                                                  | MRC2_HUMAN  | 166637 | 100% | 4 | 4 | 6 | 0.05% | 6.09% |
| XTC1-p29 | (Q9UBG0) Macrophage mannose receptor 2 precursor (Urokinase receptor-associated protein) (Endocytic receptor 180) (CD280 antigen)                                                                                  | MRC2_HUMAN  | 166637 | 100% | 4 | 4 | 4 | 0.04% | 6.22% |



## Protein Identified Sequence Coverage in XTC-1

|          |                                                                                                                                   |            |        |      |   |   |    |       |        |
|----------|-----------------------------------------------------------------------------------------------------------------------------------|------------|--------|------|---|---|----|-------|--------|
| XTC1-p29 | (Q9UBG0) Macrophage mannose receptor 2 precursor (Urokinase receptor-associated protein) (Endocytic receptor 180) (CD280 antigen) | MRC2_HUMAN | 166637 | 100% | 7 | 7 | 10 | 0.09% | 6.09%  |
| XTC1-p29 | (Q9UBG0) Macrophage mannose receptor 2 precursor (Urokinase receptor-associated protein) (Endocytic receptor 180) (CD280 antigen) | MRC2_HUMAN | 166637 | 100% | 6 | 6 | 8  | 0.08% | 9.74%  |
| XTC1-p29 | (Q9UBG0) Macrophage mannose receptor 2 precursor (Urokinase receptor-associated protein) (Endocytic receptor 180) (CD280 antigen) | MRC2_HUMAN | 166637 | 100% | 3 | 3 | 3  | 0.03% | 4.12%  |
| XTC1-p29 | (Q9UBG0) Macrophage mannose receptor 2 precursor (Urokinase receptor-associated protein) (Endocytic receptor 180) (CD280 antigen) | MRC2_HUMAN | 166637 | 100% | 2 | 2 | 3  | 0.03% | 4.26%  |
| XTC1-p29 | (Q9UBG0) Macrophage mannose receptor 2 precursor (Urokinase receptor-associated protein) (Endocytic receptor 180) (CD280 antigen) | MRC2_HUMAN | 166637 | 100% | 3 | 3 | 5  | 0.04% | 3.52%  |
| XTC1-p29 | (Q9UBG0) Macrophage mannose receptor 2 precursor (Urokinase receptor-associated protein) (Endocytic receptor 180) (CD280 antigen) | MRC2_HUMAN | 166637 | 100% | 2 | 2 | 2  | 0.02% | 3.79%  |
| XTC1-p29 | (Q9UBG0) Macrophage mannose receptor 2 precursor (Urokinase receptor-associated protein) (Endocytic receptor 180) (CD280 antigen) | MRC2_HUMAN | 166637 | 100% | 2 | 2 | 2  | 0.02% | 3.45%  |
| XTC1-p29 | (Q9UBG0) Macrophage mannose receptor 2 precursor (Urokinase receptor-associated protein) (Endocytic receptor 180) (CD280 antigen) | MRC2_HUMAN | 166637 | 100% | 3 | 3 | 8  | 0.07% | 5.54%  |
| XTC1-p29 | (Q9UBP6) tRNA (guanine-N(7)-)-methyltransferase (EC 2.1.1.33) (tRNA(m7G46)-methyltransferase) (Methyltransferase-like protein 1)  | TRMB_HUMAN | 31454  | 100% | 2 | 2 | 3  | 0.03% | 10.50% |
| XTC1-p29 | (Q9UBP6) tRNA (guanine-N(7)-)-methyltransferase (EC 2.1.1.33) (tRNA(m7G46)-methyltransferase) (Methyltransferase-like protein 1)  | TRMB_HUMAN | 31454  | 100% | 2 | 2 | 2  | 0.02% | 10.50% |
| XTC1-p29 | (Q9UBP6) tRNA (guanine-N(7)-)-methyltransferase (EC 2.1.1.33) (tRNA(m7G46)-methyltransferase) (Methyltransferase-like protein 1)  | TRMB_HUMAN | 31454  | 100% | 2 | 2 | 3  | 0.03% | 10.50% |
| XTC1-p29 | (Q9UBR2) Cathepsin Z precursor (EC 3.4.22.-) (Cathepsin X) (Cathepsin P)                                                          | CATZ_HUMAN | 33850  | 100% | 6 | 6 | 10 | 0.09% | 30.00% |
| XTC1-p29 | (Q9UBR2) Cathepsin Z precursor (EC 3.4.22.-) (Cathepsin X) (Cathepsin P)                                                          | CATZ_HUMAN | 33850  | 100% | 7 | 9 | 13 | 0.12% | 38.00% |
| XTC1-p29 | (Q9UBR2) Cathepsin Z precursor (EC 3.4.22.-) (Cathepsin X) (Cathepsin P)                                                          | CATZ_HUMAN | 33850  | 100% | 3 | 3 | 6  | 0.05% | 12.50% |
| XTC1-p29 | (Q9UBR2) Cathepsin Z precursor (EC 3.4.22.-) (Cathepsin X) (Cathepsin P)                                                          | CATZ_HUMAN | 33850  | 100% | 6 | 6 | 8  | 0.07% | 28.10% |
| XTC1-p29 | (Q9UBR2) Cathepsin Z precursor (EC 3.4.22.-) (Cathepsin X) (Cathepsin P)                                                          | CATZ_HUMAN | 33850  | 100% | 7 | 7 | 11 | 0.10% | 34.70% |

## Protein Identified Sequence Coverage in XTC-1

|          |                                                                                                                                                                                         |             |       |      |   |   |    |       |        |
|----------|-----------------------------------------------------------------------------------------------------------------------------------------------------------------------------------------|-------------|-------|------|---|---|----|-------|--------|
| XTC1-p29 | (Q9UBR2) Cathepsin Z precursor (EC 3.4.22.-) (Cathepsin X) (Cathepsin P)                                                                                                                | CATZ_HUMAN  | 33850 | 100% | 3 | 3 | 5  | 0.05% | 19.80% |
| XTC1-p29 | (Q9UBR2) Cathepsin Z precursor (EC 3.4.22.-) (Cathepsin X) (Cathepsin P)                                                                                                                | CATZ_HUMAN  | 33850 | 100% | 4 | 5 | 12 | 0.10% | 19.10% |
| XTC1-p29 | (Q9UBR2) Cathepsin Z precursor (EC 3.4.22.-) (Cathepsin X) (Cathepsin P)                                                                                                                | CATZ_HUMAN  | 33850 | 100% | 2 | 2 | 8  | 0.07% | 24.10% |
| XTC1-p29 | (Q9UBR2) Cathepsin Z precursor (EC 3.4.22.-) (Cathepsin X) (Cathepsin P)                                                                                                                | CATZ_HUMAN  | 33850 | 100% | 3 | 4 | 10 | 0.09% | 15.20% |
| XTC1-p29 | (Q9UBS4) DnaJ homolog subfamily B member 11 precursor (ER-associated dnaJ protein 3) (ErJ3) (ER associated Hsp40 co-chaperone) (hdj9) (PWP1-interacting protein 4)                      | DNJBB_HUMAN | 40497 | 100% | 2 | 2 | 2  | 0.02% | 8.94%  |
| XTC1-p29 | (Q9UBS4) DnaJ homolog subfamily B member 11 precursor (ER-associated dnaJ protein 3) (ErJ3) (ER associated Hsp40 co-chaperone) (hdj9) (PWP1-interacting protein 4)                      | DNJBB_HUMAN | 40497 | 100% | 2 | 2 | 3  | 0.03% | 10.90% |
| XTC1-p29 | (Q9UHG3) Prenylcysteine oxidase precursor (EC 1.8.3.5) (PCL1)                                                                                                                           | PCYOX_HUMAN | 56595 | 100% | 2 | 2 | 3  | 0.03% | 6.14%  |
| XTC1-p29 | (Q9UHG3) Prenylcysteine oxidase precursor (EC 1.8.3.5) (PCL1)                                                                                                                           | PCYOX_HUMAN | 56595 | 100% | 2 | 2 | 3  | 0.03% | 5.74%  |
| XTC1-p29 | (Q9UHG3) Prenylcysteine oxidase precursor (EC 1.8.3.5) (PCL1)                                                                                                                           | PCYOX_HUMAN | 56595 | 100% | 2 | 2 | 3  | 0.03% | 5.74%  |
| XTC1-p29 | (Q9UHG3) Prenylcysteine oxidase precursor (EC 1.8.3.5) (PCL1)                                                                                                                           | PCYOX_HUMAN | 56595 | 100% | 3 | 3 | 3  | 0.03% | 7.92%  |
| XTC1-p29 | (Q9UHG3) Prenylcysteine oxidase precursor (EC 1.8.3.5) (PCL1)                                                                                                                           | PCYOX_HUMAN | 56595 | 100% | 4 | 4 | 5  | 0.04% | 11.30% |
| XTC1-p29 | (Q9UHL4) Dipeptidyl-peptidase 2 precursor (EC 3.4.14.2) (Dipeptidyl-peptidase II) (DPP II) (Dipeptidyl aminopeptidase II) (Quiescent cell proline dipeptidase) (Dipeptidyl peptidase 7) | DPP2_HUMAN  | 54311 | 100% | 2 | 3 | 4  | 0.04% | 5.89%  |
| XTC1-p29 | (Q9UHL4) Dipeptidyl-peptidase 2 precursor (EC 3.4.14.2) (Dipeptidyl-peptidase II) (DPP II) (Dipeptidyl aminopeptidase II) (Quiescent cell proline dipeptidase) (Dipeptidyl peptidase 7) | DPP2_HUMAN  | 54311 | 100% | 2 | 3 | 4  | 0.04% | 8.54%  |
| XTC1-p29 | (Q9UHL4) Dipeptidyl-peptidase 2 precursor (EC 3.4.14.2) (Dipeptidyl-peptidase II) (DPP II) (Dipeptidyl aminopeptidase II) (Quiescent cell proline dipeptidase) (Dipeptidyl peptidase 7) | DPP2_HUMAN  | 54311 | 100% | 4 | 4 | 6  | 0.06% | 15.20% |
| XTC1-p29 | (Q9UHL4) Dipeptidyl-peptidase 2 precursor (EC 3.4.14.2) (Dipeptidyl-peptidase II) (DPP II) (Dipeptidyl aminopeptidase II) (Quiescent cell proline dipeptidase) (Dipeptidyl peptidase 7) | DPP2_HUMAN  | 54311 | 100% | 7 | 7 | 13 | 0.12% | 26.60% |
| XTC1-p29 | (Q9UHL4) Dipeptidyl-peptidase 2 precursor (EC 3.4.14.2) (Dipeptidyl-peptidase II) (DPP II) (Dipeptidyl aminopeptidase II) (Quiescent cell proline dipeptidase) (Dipeptidyl peptidase 7) | DPP2_HUMAN  | 54311 | 100% | 4 | 5 | 9  | 0.08% | 17.10% |
| XTC1-p29 | (Q9UHL4) Dipeptidyl-peptidase 2 precursor (EC 3.4.14.2) (Dipeptidyl-peptidase II) (DPP II) (Dipeptidyl aminopeptidase II) (Quiescent cell proline dipeptidase) (Dipeptidyl peptidase 7) | DPP2_HUMAN  | 54311 | 100% | 6 | 9 | 13 | 0.12% | 18.10% |
| XTC1-p29 | (Q9UHL4) Dipeptidyl-peptidase 2 precursor (EC 3.4.14.2) (Dipeptidyl-peptidase II) (DPP II) (Dipeptidyl aminopeptidase II) (Quiescent cell proline dipeptidase) (Dipeptidyl peptidase 7) | DPP2_HUMAN  | 54311 | 100% | 7 | 7 | 11 | 0.10% | 22.20% |

## Protein Identified Sequence Coverage in XTC-1

|          |                                                                                                                                                                                                            |             |       |      |   |   |   |       |        |
|----------|------------------------------------------------------------------------------------------------------------------------------------------------------------------------------------------------------------|-------------|-------|------|---|---|---|-------|--------|
| XTC1-p29 | (Q9UHL4) Dipeptidyl-peptidase 2 precursor (EC 3.4.14.2) (Dipeptidyl-peptidase II) (DPP II) (Dipeptidyl aminopeptidase II) (Quiescent cell proline dipeptidase) (Dipeptidyl peptidase 7)                    | DPP2_HUMAN  | 54311 | 100% | 3 | 3 | 3 | 0.03% | 7.11%  |
| XTC1-p29 | (Q9UHL4) Dipeptidyl-peptidase 2 precursor (EC 3.4.14.2) (Dipeptidyl-peptidase II) (DPP II) (Dipeptidyl aminopeptidase II) (Quiescent cell proline dipeptidase) (Dipeptidyl peptidase 7)                    | DPP2_HUMAN  | 54311 | 100% | 2 | 3 | 4 | 0.03% | 10.40% |
| XTC1-p29 | (Q9UHL4) Dipeptidyl-peptidase 2 precursor (EC 3.4.14.2) (Dipeptidyl-peptidase II) (DPP II) (Dipeptidyl aminopeptidase II) (Quiescent cell proline dipeptidase) (Dipeptidyl peptidase 7)                    | DPP2_HUMAN  | 54311 | 100% | 2 | 3 | 8 | 0.07% | 7.52%  |
| XTC1-p29 | (Q9UL46) Proteasome activator complex subunit 2 (Proteasome activator 28-beta subunit) (PA28beta) (PA28b) (Activator of multicatalytic protease subunit 2) (11S regulator complex beta subunit) (REG-beta) | PSME2_HUMAN | 27213 | 100% | 2 | 2 | 4 | 0.04% | 16.00% |
| XTC1-p29 | (Q9UL46) Proteasome activator complex subunit 2 (Proteasome activator 28-beta subunit) (PA28beta) (PA28b) (Activator of multicatalytic protease subunit 2) (11S regulator complex beta subunit) (REG-beta) | PSME2_HUMAN | 27213 | 100% | 3 | 5 | 8 | 0.07% | 22.30% |
| XTC1-p29 | (Q9UL46) Proteasome activator complex subunit 2 (Proteasome activator 28-beta subunit) (PA28beta) (PA28b) (Activator of multicatalytic protease subunit 2) (11S regulator complex beta subunit) (REG-beta) | PSME2_HUMAN | 27213 | 100% | 2 | 2 | 2 | 0.02% | 16.00% |
| XTC1-p29 | (Q9UL46) Proteasome activator complex subunit 2 (Proteasome activator 28-beta subunit) (PA28beta) (PA28b) (Activator of multicatalytic protease subunit 2) (11S regulator complex beta subunit) (REG-beta) | PSME2_HUMAN | 27213 | 100% | 3 | 5 | 5 | 0.04% | 22.30% |
| XTC1-p29 | (Q9UL46) Proteasome activator complex subunit 2 (Proteasome activator 28-beta subunit) (PA28beta) (PA28b) (Activator of multicatalytic protease subunit 2) (11S regulator complex beta subunit) (REG-beta) | PSME2_HUMAN | 27213 | 100% | 2 | 3 | 5 | 0.04% | 14.70% |
| XTC1-p29 | (Q9UL46) Proteasome activator complex subunit 2 (Proteasome activator 28-beta subunit) (PA28beta) (PA28b) (Activator of multicatalytic protease subunit 2) (11S regulator complex beta subunit) (REG-beta) | PSME2_HUMAN | 27213 | 100% | 2 | 3 | 3 | 0.03% | 14.70% |
| XTC1-p29 | (Q9UM22) Mammalian endymin-related protein 1 precursor (MERP-1) (UCC1 protein)                                                                                                                             | EPDR1_HUMAN | 25420 | 100% | 2 | 2 | 3 | 0.03% | 22.80% |
| XTC1-p29 | (Q9UM22) Mammalian endymin-related protein 1 precursor (MERP-1) (UCC1 protein)                                                                                                                             | EPDR1_HUMAN | 25420 | 100% | 4 | 4 | 7 | 0.06% | 19.60% |
| XTC1-p29 | (Q9UM22) Mammalian endymin-related protein 1 precursor (MERP-1) (UCC1 protein)                                                                                                                             | EPDR1_HUMAN | 25420 | 100% | 2 | 2 | 4 | 0.04% | 8.93%  |
| XTC1-p29 | (Q9UM22) Mammalian endymin-related protein 1 precursor (MERP-1) (UCC1 protein)                                                                                                                             | EPDR1_HUMAN | 25420 | 100% | 4 | 4 | 8 | 0.07% | 19.60% |
| XTC1-p29 | (Q9UM22) Mammalian endymin-related protein 1 precursor (MERP-1) (UCC1 protein)                                                                                                                             | EPDR1_HUMAN | 25420 | 100% | 4 | 4 | 6 | 0.05% | 19.60% |
| XTC1-p29 | (Q9UM22) Mammalian endymin-related protein 1 precursor (MERP-1) (UCC1 protein)                                                                                                                             | EPDR1_HUMAN | 25420 | 100% | 4 | 4 | 8 | 0.07% | 19.60% |

## Protein Identified Sequence Coverage in XTC-1

|          |                                                                                                                                                                      |             |        |      |   |   |    |       |        |
|----------|----------------------------------------------------------------------------------------------------------------------------------------------------------------------|-------------|--------|------|---|---|----|-------|--------|
| XTC1-p29 | (Q9UM22) Mammalian ependymin-related protein 1 precursor (MERP-1) (UCC1 protein)                                                                                     | EPDR1_HUMAN | 25420  | 100% | 2 | 2 | 6  | 0.05% | 10.30% |
| XTC1-p29 | (Q9UM22) Mammalian ependymin-related protein 1 precursor (MERP-1) (UCC1 protein)                                                                                     | EPDR1_HUMAN | 25420  | 100% | 3 | 3 | 5  | 0.04% | 14.70% |
| XTC1-p29 | (Q9UM22) Mammalian ependymin-related protein 1 precursor (MERP-1) (UCC1 protein)                                                                                     | EPDR1_HUMAN | 25420  | 100% | 2 | 2 | 3  | 0.03% | 8.04%  |
| XTC1-p29 | (Q9UMF0) Intercellular adhesion molecule 5 precursor (ICAM-5) (Telencephalin)                                                                                        | ICAM5_HUMAN | 97311  | 100% | 2 | 2 | 2  | 0.02% | 3.46%  |
| XTC1-p29 | (Q9UMF0) Intercellular adhesion molecule 5 precursor (ICAM-5) (Telencephalin)                                                                                        | ICAM5_HUMAN | 97311  | 100% | 2 | 2 | 3  | 0.03% | 4.22%  |
| XTC1-p29 | (Q9UMR5) Palmitoyl-protein thioesterase 2 precursor (EC 3.1.2.22) (Palmitoyl-protein hydrolase 2) (PPT-2) (G14)                                                      | PPT2_HUMAN  | 34291  | 100% | 2 | 2 | 4  | 0.04% | 12.90% |
| XTC1-p29 | (Q9UMR5) Palmitoyl-protein thioesterase 2 precursor (EC 3.1.2.22) (Palmitoyl-protein hydrolase 2) (PPT-2) (G14)                                                      | PPT2_HUMAN  | 34291  | 100% | 3 | 3 | 4  | 0.04% | 15.90% |
| XTC1-p29 | (Q9UMR5) Palmitoyl-protein thioesterase 2 precursor (EC 3.1.2.22) (Palmitoyl-protein hydrolase 2) (PPT-2) (G14)                                                      | PPT2_HUMAN  | 34291  | 100% | 2 | 3 | 4  | 0.04% | 7.95%  |
| XTC1-p29 | (Q9UMX5) Neudesin precursor (Neuron-derived neurotrophic factor) (Secreted protein of unknown function) (SPUF protein)                                               | NENF_HUMAN  | 18839  | 100% | 2 | 2 | 3  | 0.03% | 16.90% |
| XTC1-p29 | (Q9UNW1) Multiple inositol polyphosphate phosphatase 1 precursor (EC 3.1.3.62) (Inositol (1,3,4,5)-tetrakisphosphate 3-phosphatase) (Ins(1,3,4,5)P(4) 3-phosphatase) | MINP1_HUMAN | 55035  | 100% | 2 | 2 | 3  | 0.03% | 10.50% |
| XTC1-p29 | (Q9UNW1) Multiple inositol polyphosphate phosphatase 1 precursor (EC 3.1.3.62) (Inositol (1,3,4,5)-tetrakisphosphate 3-phosphatase) (Ins(1,3,4,5)P(4) 3-phosphatase) | MINP1_HUMAN | 55035  | 100% | 2 | 3 | 3  | 0.03% | 6.78%  |
| XTC1-p29 | (Q9Y2B0) MIR-interacting saposin-like protein precursor (Transmembrane protein 4) (Putative secreted protein ZSIG9)                                                  | MSAP_HUMAN  | 20635  | 100% | 3 | 3 | 4  | 0.04% | 25.80% |
| XTC1-p29 | (Q9Y2B0) MIR-interacting saposin-like protein precursor (Transmembrane protein 4) (Putative secreted protein ZSIG9)                                                  | MSAP_HUMAN  | 20635  | 100% | 7 | 9 | 17 | 0.16% | 47.30% |
| XTC1-p29 | (Q9Y2B0) MIR-interacting saposin-like protein precursor (Transmembrane protein 4) (Putative secreted protein ZSIG9)                                                  | MSAP_HUMAN  | 20635  | 100% | 3 | 4 | 5  | 0.05% | 25.80% |
| XTC1-p29 | (Q9Y2B0) MIR-interacting saposin-like protein precursor (Transmembrane protein 4) (Putative secreted protein ZSIG9)                                                  | MSAP_HUMAN  | 20635  | 100% | 5 | 6 | 9  | 0.08% | 40.10% |
| XTC1-p29 | (Q9Y2B0) MIR-interacting saposin-like protein precursor (Transmembrane protein 4) (Putative secreted protein ZSIG9)                                                  | MSAP_HUMAN  | 20635  | 100% | 6 | 8 | 13 | 0.12% | 47.80% |
| XTC1-p29 | (Q9Y2B0) MIR-interacting saposin-like protein precursor (Transmembrane protein 4) (Putative secreted protein ZSIG9)                                                  | MSAP_HUMAN  | 20635  | 100% | 2 | 3 | 3  | 0.03% | 15.90% |
| XTC1-p29 | (Q9Y2E5) Epididymis-specific alpha-mannosidase precursor (EC 3.2.1.24) (Mannosidase alpha class 2B member 2)                                                         | MA2B2_HUMAN | 113870 | 100% | 2 | 2 | 3  | 0.03% | 3.67%  |
| XTC1-p29 | (Q9Y2E5) Epididymis-specific alpha-mannosidase precursor (EC 3.2.1.24) (Mannosidase alpha class 2B member 2)                                                         | MA2B2_HUMAN | 113870 | 100% | 2 | 2 | 2  | 0.02% | 3.67%  |

## Protein Identified Sequence Coverage in XTC-1

|          |                                                                                                              |             |        |      |    |    |    |       |        |
|----------|--------------------------------------------------------------------------------------------------------------|-------------|--------|------|----|----|----|-------|--------|
| XTC1-p29 | (Q9Y2E5) Epididymis-specific alpha-mannosidase precursor (EC 3.2.1.24) (Mannosidase alpha class 2B member 2) | MA2B2_HUMAN | 113870 | 100% | 2  | 2  | 4  | 0.04% | 3.67%  |
| XTC1-p29 | (Q9Y2E5) Epididymis-specific alpha-mannosidase precursor (EC 3.2.1.24) (Mannosidase alpha class 2B member 2) | MA2B2_HUMAN | 113870 | 100% | 2  | 2  | 3  | 0.03% | 4.46%  |
| XTC1-p29 | (Q9Y490) Talin-1                                                                                             | TLN1_HUMAN  | 269747 | 100% | 2  | 2  | 2  | 0.02% | 2.20%  |
| XTC1-p29 | (Q9Y490) Talin-1                                                                                             | TLN1_HUMAN  | 269747 | 100% | 2  | 2  | 2  | 0.02% | 1.81%  |
| XTC1-p29 | (Q9Y4L1) 150 kDa oxygen-regulated protein precursor (Orp150) (Hypoxia up-regulated 1)                        | OXR_P_HUMAN | 111319 | 100% | 3  | 5  | 7  | 0.07% | 3.40%  |
| XTC1-p29 | (Q9Y4L1) 150 kDa oxygen-regulated protein precursor (Orp150) (Hypoxia up-regulated 1)                        | OXR_P_HUMAN | 111319 | 100% | 7  | 9  | 11 | 0.11% | 6.91%  |
| XTC1-p29 | (Q9Y4L1) 150 kDa oxygen-regulated protein precursor (Orp150) (Hypoxia up-regulated 1)                        | OXR_P_HUMAN | 111319 | 100% | 5  | 6  | 16 | 0.15% | 6.01%  |
| XTC1-p29 | (Q9Y4L1) 150 kDa oxygen-regulated protein precursor (Orp150) (Hypoxia up-regulated 1)                        | OXR_P_HUMAN | 111319 | 100% | 5  | 6  | 12 | 0.11% | 6.01%  |
| XTC1-p29 | (Q9Y4L1) 150 kDa oxygen-regulated protein precursor (Orp150) (Hypoxia up-regulated 1)                        | OXR_P_HUMAN | 111319 | 100% | 2  | 2  | 4  | 0.04% | 3.90%  |
| XTC1-p29 | (Q9Y4L1) 150 kDa oxygen-regulated protein precursor (Orp150) (Hypoxia up-regulated 1)                        | OXR_P_HUMAN | 111319 | 100% | 15 | 16 | 22 | 0.20% | 25.20% |
| XTC1-p29 | (Q9Y4L1) 150 kDa oxygen-regulated protein precursor (Orp150) (Hypoxia up-regulated 1)                        | OXR_P_HUMAN | 111319 | 100% | 18 | 21 | 38 | 0.35% | 33.50% |
| XTC1-p29 | (Q9Y4L1) 150 kDa oxygen-regulated protein precursor (Orp150) (Hypoxia up-regulated 1)                        | OXR_P_HUMAN | 111319 | 100% | 9  | 10 | 19 | 0.17% | 16.90% |
| XTC1-p29 | (Q9Y4L1) 150 kDa oxygen-regulated protein precursor (Orp150) (Hypoxia up-regulated 1)                        | OXR_P_HUMAN | 111319 | 100% | 20 | 22 | 30 | 0.27% | 31.30% |
| XTC1-p29 | (Q9Y4L1) 150 kDa oxygen-regulated protein precursor (Orp150) (Hypoxia up-regulated 1)                        | OXR_P_HUMAN | 111319 | 100% | 15 | 16 | 27 | 0.24% | 22.40% |
| XTC1-p29 | (Q9Y4L1) 150 kDa oxygen-regulated protein precursor (Orp150) (Hypoxia up-regulated 1)                        | OXR_P_HUMAN | 111319 | 100% | 6  | 6  | 14 | 0.13% | 12.40% |
| XTC1-p29 | (Q9Y4L1) 150 kDa oxygen-regulated protein precursor (Orp150) (Hypoxia up-regulated 1)                        | OXR_P_HUMAN | 111319 | 100% | 14 | 20 | 28 | 0.24% | 24.80% |
| XTC1-p29 | (Q9Y4L1) 150 kDa oxygen-regulated protein precursor (Orp150) (Hypoxia up-regulated 1)                        | OXR_P_HUMAN | 111319 | 100% | 4  | 4  | 7  | 0.06% | 8.21%  |
| XTC1-p29 | (Q9Y4L1) 150 kDa oxygen-regulated protein precursor (Orp150) (Hypoxia up-regulated 1)                        | OXR_P_HUMAN | 111319 | 100% | 10 | 16 | 31 | 0.26% | 20.30% |
| XTC1-p29 | (Q9Y4L1) 150 kDa oxygen-regulated protein precursor (Orp150) (Hypoxia up-regulated 1)                        | OXR_P_HUMAN | 111319 | 100% | 3  | 3  | 5  | 0.04% | 8.91%  |
| XTC1-p29 | (Q9Y4L1) 150 kDa oxygen-regulated protein precursor (Orp150) (Hypoxia up-regulated 1)                        | OXR_P_HUMAN | 111319 | 100% | 3  | 4  | 11 | 0.10% | 7.21%  |
| XTC1-p29 | (Q9Y4L1) 150 kDa oxygen-regulated protein precursor (Orp150) (Hypoxia up-regulated 1)                        | OXR_P_HUMAN | 111319 | 100% | 4  | 7  | 12 | 0.10% | 9.31%  |
| XTC1-p29 | (Q9Y4L1) 150 kDa oxygen-regulated protein precursor (Orp150) (Hypoxia up-regulated 1)                        | OXR_P_HUMAN | 111319 | 100% | 3  | 3  | 6  | 0.05% | 6.11%  |
| XTC1-p29 | (Q9Y625) Glypican-6 precursor                                                                                | GPC6_HUMAN  | 62718  | 100% | 2  | 2  | 3  | 0.03% | 8.29%  |
| XTC1-p29 | (Q9Y625) Glypican-6 precursor                                                                                | GPC6_HUMAN  | 62718  | 100% | 2  | 2  | 2  | 0.02% | 8.65%  |
| XTC1-p29 | (Q9Y625) Glypican-6 precursor                                                                                | GPC6_HUMAN  | 62718  | 100% | 2  | 2  | 4  | 0.04% | 5.77%  |
| XTC1-p29 | (Q9Y625) Glypican-6 precursor                                                                                | GPC6_HUMAN  | 62718  | 100% | 2  | 3  | 9  | 0.08% | 8.29%  |

**Proteins Identified and Their Sequence Coverage in ARO Cell Line**

Experiment: ARO-p65-p67

Peak List Generator:

Version: Bioworks 3.3.1  
Charge States Calculated: yes  
Deisotoped: no

Database Set:

Database Name: uniprot\_060206.fasta  
Version: 060206  
Taxonomy: Homo sapiens  
Number of Proteins: 14164

Search Engine Set: 2 Search Engines

Search Engine: Mascot

Version: 2.1.03  
Samples: All Samples  
Fragment Tolerance: 0.80 Da (Monoisotopic)  
Parent Tolerance: 1.6 Da (Monoisotopic)  
Fixed Modifications: +57 on C (Carbamidomethyl)  
Variable Modifications: +16 on M (Oxidation)  
Database: Sprot\_060206.fasta (selected for Homo sapiens, unknown version, 14164 entries)  
Digestion Enzyme: Trypsin  
Max Missed Cleavages: 2

Search Engine: X! Tandem

Version: 2007.01.01.1  
Samples: All Samples  
Fragment Tolerance: 0.100 Da (Monoisotopic)  
Parent Tolerance: 1.6 Da (Monoisotopic)  
Fixed Modifications: +57 on C (Carbamidomethyl)  
Variable Modifications: +1 on N (Deamidation), +16 on M (Oxidation)  
Database: uniprot\_sprot\_060206  
Digestion Enzyme: Trypsin  
Max Missed Cleavages: 2

Scaffold Version: Scaffold\_2\_01\_02

Peptide Thresholds: 95.0% minimum  
Protein Thresholds: 99.0% minimum and 2 peptides minimum

| Biological sample name | Protein name                                                                                                                                                                                                                                       | Protein accession numbers | Protein molecular weight (Da) | Protein identification probability | Number of unique peptides | Number of unique spectra | Number of total spectra | Percentage sequence coverage |
|------------------------|----------------------------------------------------------------------------------------------------------------------------------------------------------------------------------------------------------------------------------------------------|---------------------------|-------------------------------|------------------------------------|---------------------------|--------------------------|-------------------------|------------------------------|
| ARO-p65                | (O00115) Deoxyribonuclease-2-alpha precursor (EC 3.1.22.1) (Deoxyribonuclease II alpha) (DNase II alpha) (Acid DNase) (Lysosomal DNase II) (R31240_2)                                                                                              | DNS2A_HUMAN               | 39563                         | 100%                               | 3                         | 3                        | 8                       | 10.00%                       |
| ARO-p65                | (O00468) Agrin precursor                                                                                                                                                                                                                           | AGRN_HUMAN                | 214863                        | 100%                               | 47                        | 57                       | 169                     | 40.10%                       |
| ARO-p65                | (O00560) Syntenin-1 (Syndecan-binding protein 1) (Melanoma differentiation-associated protein 9) (MDA9) (Scaffold protein Pbp1) (Pro-TGF-alpha cytoplasmic domain-interacting protein 18) (TACIP18)                                                | SDCB1_HUMAN               | 32427                         | 100%                               | 3                         | 4                        | 7                       | 25.50%                       |
| ARO-p65                | (O00754) Lysosomal alpha-mannosidase precursor (EC 3.2.1.24) (Mannosidase, alpha B) (Lysosomal acid alpha-mannosidase) (Laman) (Mannosidase alpha class 2B member 1) [Contains: Lysosomal alpha-mannosidase A peptide; Lysosomal alpha-mannosidase | MA2B1_HUMAN               | 113656                        | 100%                               | 2                         | 2                        | 3                       | 2.87%                        |

## Protein Identified Sequence Coverage in ARO

|         |                                                                                                                                                                                                                                                    |             |        |      |    |    |     |        |
|---------|----------------------------------------------------------------------------------------------------------------------------------------------------------------------------------------------------------------------------------------------------|-------------|--------|------|----|----|-----|--------|
| ARO-p65 | (O14672) ADAM 10 precursor (EC 3.4.24.81) (A disintegrin and metalloproteinase domain 10) (Mammalian disintegrin-metalloprotease) (Kuzbanian protein homolog) (CDw156c antigen)                                                                    | ADA10_HUMAN | 84125  | 100% | 14 | 17 | 47  | 29.70% |
| ARO-p65 | (O14773) Tripeptidyl-peptidase 1 precursor (EC 3.4.14.9) (Tripeptidyl-peptidase I) (TPP-I) (Tripeptidyl aminopeptidase) (Lysosomal pepstatin insensitive protease) (LPIC) (Growth-inhibiting gene 1 protein)                                       | TPP1_HUMAN  | 61230  | 100% | 9  | 12 | 92  | 37.50% |
| ARO-p65 | (O15031) Plexin-B2 precursor (MM1)                                                                                                                                                                                                                 | PLXB2_HUMAN | 205081 | 100% | 12 | 12 | 21  | 14.00% |
| ARO-p65 | (O15230) Laminin alpha-5 chain precursor                                                                                                                                                                                                           | LAMA5_HUMAN | 399681 | 100% | 2  | 2  | 2   | 1.00%  |
| ARO-p65 | (O15551) Claudin-3 (Clostridium perfringens enterotoxin receptor 2) (CPE-receptor 2) (CPE-R 2) (Ventral prostate.1 protein homolog) (HRVP1)                                                                                                        | CLD3_HUMAN  | 23301  | 100% | 2  | 2  | 10  | 13.60% |
| ARO-p65 | (O43169) Cytochrome b5 outer mitochondrial membrane isoform precursor                                                                                                                                                                              | CYB5M_HUMAN | 16314  | 100% | 3  | 3  | 9   | 44.50% |
| ARO-p65 | (O43278) Kunitz-type protease inhibitor 1 precursor (Hepatocyte growth factor activator inhibitor type 1) (HAI-1)                                                                                                                                  | SPIT1_HUMAN | 58379  | 100% | 4  | 4  | 10  | 9.07%  |
| ARO-p65 | (O43399) Tumor protein D54 (hD54) (Tumor protein D52-like 2)                                                                                                                                                                                       | TPD54_HUMAN | 22220  | 100% | 13 | 17 | 101 | 59.70% |
| ARO-p65 | (O43490) Prominin-1 precursor (Prominin-like protein 1) (Antigen AC133) (CD133 antigen)                                                                                                                                                            | PROM1_HUMAN | 97188  | 100% | 2  | 2  | 3   | 4.05%  |
| ARO-p65 | (O43570) Carbonic anhydrase 12 precursor (EC 4.2.1.1) (Carbonic anhydrase XII) (Carbonate dehydratase XII) (CA-XII) (Tumor antigen HOM-RCC-3.1.3)                                                                                                  | CAH12_HUMAN | 39434  | 100% | 6  | 7  | 19  | 29.40% |
| ARO-p65 | (O43670) Zinc finger protein 207                                                                                                                                                                                                                   | ZN207_HUMAN | 50733  | 100% | 3  | 4  | 10  | 9.83%  |
| ARO-p65 | (O43809) Cleavage and polyadenylation specificity factor 5 (Cleavage and polyadenylation specificity factor 25 kDa subunit) (CPSF 25 kDa subunit) (Pre-mRNA cleavage factor Im 25-kDa subunit) (Nucleoside diphosphate-linked moiety X motif 21) ( | CPSF5_HUMAN | 26210  | 100% | 4  | 4  | 7   | 25.10% |
| ARO-p65 | (O60635) Tetraspanin-1 (Tspan-1) (Tetraspan NET-1) (Tetraspanin TM4-C)                                                                                                                                                                             | TSN1_HUMAN  | 26283  | 100% | 2  | 2  | 5   | 12.40% |
| ARO-p65 | (O60637) Tetraspanin-3 (Tspan-3) (Transmembrane 4 superfamily member 8) (Tetraspanin TM4-A)                                                                                                                                                        | TSN3_HUMAN  | 28000  | 100% | 4  | 4  | 6   | 23.70% |
| ARO-p65 | (O60888) Protein CutA precursor (Brain acetylcholinesterase putative membrane anchor) (Acetylcholinesterase-associated protein)                                                                                                                    | CUTA_HUMAN  | 19098  | 100% | 2  | 2  | 3   | 22.90% |
| ARO-p65 | (O75367) Core histone macro-H2A.1 (Histone macroH2A1) (mH2A1) (H2A.y) (H2A/y) (Medulloblastoma antigen MU-MB-50.205)                                                                                                                               | H2AY_HUMAN  | 39470  | 100% | 13 | 15 | 88  | 55.80% |
| ARO-p65 | (O75503) Ceroid-lipofuscinosis neuronal protein 5 (Protein CLN5)                                                                                                                                                                                   | CLN5_HUMAN  | 46323  | 100% | 3  | 3  | 4   | 15.20% |
| ARO-p65 | (O75531) Barrier-to-autointegration factor (Breakpoint cluster region protein 1)                                                                                                                                                                   | BAF_HUMAN   | 10041  | 100% | 2  | 3  | 12  | 29.20% |
| ARO-p65 | (O75976) Carboxypeptidase D precursor (EC 3.4.17.22) (Metallo-carboxypeptidase D) (gp180)                                                                                                                                                          | CBPD_HUMAN  | 152899 | 100% | 2  | 2  | 2   | 3.99%  |
| ARO-p65 | (O76021) Ribosomal L1 domain-containing protein 1 (Cellular senescence-inhibited gene protein) (PBK1 protein) (CATX-11)                                                                                                                            | RL1D1_HUMAN | 54957  | 100% | 6  | 6  | 14  | 15.70% |

## Protein Identified Sequence Coverage in ARO

|         |                                                                                                                                                                                                                |             |        |      |    |    |     |        |
|---------|----------------------------------------------------------------------------------------------------------------------------------------------------------------------------------------------------------------|-------------|--------|------|----|----|-----|--------|
| ARO-p65 | (O95858) Tetraspanin-15 (Tspan-15)<br>(Transmembrane 4 superfamily member 15)<br>(Tetraspan NET-7)                                                                                                             | TSN15_HUMAN | 33148  | 100% | 3  | 3  | 5   | 15.60% |
| ARO-p65 | (P00390) Glutathione reductase, mitochondrial<br>precursor (EC 1.8.1.7) (GR) (GRase)                                                                                                                           | GSHR_HUMAN  | 56239  | 100% | 8  | 8  | 14  | 24.70% |
| ARO-p65 | (P00441) Superoxide dismutase [Cu-Zn] (EC<br>1.15.1.1)                                                                                                                                                         | SODC_HUMAN  | 15786  | 100% | 2  | 2  | 3   | 30.70% |
| ARO-p65 | (P00558) Phosphoglycerate kinase 1 (EC 2.7.2.3)<br>(Primer recognition protein 2) (PRP 2)                                                                                                                      | PGK1_HUMAN  | 44466  | 100% | 6  | 6  | 8   | 22.10% |
| ARO-p65 | (P01009) Alpha-1-antitrypsin precursor (Alpha-1<br>protease inhibitor) (Alpha-1-antiprotease)                                                                                                                  | A1AT_HUMAN  | 46720  | 100% | 15 | 20 | 101 | 51.40% |
| ARO-p65 | (P01019) Angiotensinogen precursor [Contains:<br>Angiotensin-1 (Angiotensin I) (Ang I); Angiotensin-2<br>(Angiotensin II) (Ang II); Angiotensin-3 (Angiotensin<br>III) (Ang III) (Des-Asp[1]-angiotensin II)]  | ANGT_HUMAN  | 53137  | 100% | 3  | 4  | 8   | 10.90% |
| ARO-p65 | (P01023) Alpha-2-macroglobulin precursor (Alpha-2-<br>M)                                                                                                                                                       | A2MG_HUMAN  | 163259 | 100% | 2  | 2  | 3   | 1.49%  |
| ARO-p65 | (P01033) Metalloproteinase inhibitor 1 precursor<br>(TIMP-1) (Erythroid potentiating activity) (EPA)<br>(Tissue inhibitor of metalloproteinases) (Fibroblast<br>collagenase inhibitor) (Collagenase inhibitor) | TIMP1_HUMAN | 23153  | 100% | 5  | 5  | 9   | 39.60% |
| ARO-p65 | (P01137) Transforming growth factor beta-1<br>precursor (TGF-beta-1) [Contains: Latency-<br>associated peptide (LAP)]                                                                                          | TGFB1_HUMAN | 44324  | 100% | 2  | 2  | 2   | 15.60% |
| ARO-p65 | (P02649) Apolipoprotein E precursor (Apo-E)                                                                                                                                                                    | APOE_HUMAN  | 36136  | 100% | 2  | 2  | 4   | 7.57%  |
| ARO-p65 | (P02768) Serum albumin precursor                                                                                                                                                                               | ALBU_HUMAN  | 69349  | 100% | 4  | 4  | 10  | 8.54%  |
| ARO-p65 | (P02771) Alpha-fetoprotein precursor (Alpha-<br>fetoglobulin) (Alpha-1-fetoprotein)                                                                                                                            | FETA_HUMAN  | 68660  | 100% | 2  | 2  | 3   | 6.40%  |
| ARO-p65 | (P04004) Vitronectin precursor (Serum spreading<br>factor) (S-protein) (V75) [Contains: Vitronectin V65<br>subunit; Vitronectin V10 subunit; Somatomedin B]                                                    | VTNC_HUMAN  | 54288  | 100% | 2  | 2  | 11  | 8.79%  |
| ARO-p65 | (P04062) Glucosylceramidase precursor (EC<br>3.2.1.45) (Beta-glucocerebrosidase) (Acid beta-<br>glucosidase) (D-glucosyl-N-acylsphingosine<br>glucohydrolase) (Alglucerase) (Imiglucerase)                     | GLCM_HUMAN  | 59700  | 100% | 11 | 15 | 57  | 30.80% |
| ARO-p65 | (P04075) Fructose-bisphosphate aldolase A (EC<br>4.1.2.13) (Muscle-type aldolase) (Lung cancer<br>antigen NY-LU-1)                                                                                             | ALDOA_HUMAN | 39271  | 100% | 6  | 6  | 11  | 27.00% |
| ARO-p65 | (P04083) Annexin A1 (Annexin I) (Lipocortin I)<br>(Calpactin II) (Chromobindin-9) (p35) (Phospholipase<br>A2 inhibitory protein)                                                                               | ANXA1_HUMAN | 38567  | 100% | 8  | 9  | 26  | 37.40% |
| ARO-p65 | (P04264) Keratin, type II cytoskeletal 1 (Cytokeratin-<br>1) (CK-1) (Keratin-1) (K1) (67 kDa cytokeratin) (Hair<br>alpha protein)                                                                              | K2C1_HUMAN  | 65870  | 100% | 8  | 8  | 23  | 14.50% |
| ARO-p65 | (P04406) Glyceraldehyde-3-phosphate<br>dehydrogenase (EC 1.2.1.12) (GAPDH)                                                                                                                                     | G3P_HUMAN   | 35904  | 100% | 5  | 5  | 9   | 22.50% |
| ARO-p65 | (P05023) Sodium/potassium-transporting ATPase<br>alpha-1 chain precursor (EC 3.6.3.9) (Sodium pump<br>1) (Na+/K+ ATPase 1)                                                                                     | AT1A1_HUMAN | 112882 | 100% | 4  | 4  | 7   | 9.09%  |
| ARO-p65 | (P05026) Sodium/potassium-transporting ATPase<br>subunit beta-1 (Sodium/potassium-dependent<br>ATPase beta-1 subunit)                                                                                          | AT1B1_HUMAN | 35045  | 100% | 4  | 5  | 13  | 26.70% |



## Protein Identified Sequence Coverage in ARO

|         |                                                                                                                                                                                                                                                      |             |       |      |    |    |     |        |
|---------|------------------------------------------------------------------------------------------------------------------------------------------------------------------------------------------------------------------------------------------------------|-------------|-------|------|----|----|-----|--------|
| ARO-p65 | (P05067) Amyloid beta A4 protein precursor (APP) (ABPP) (Alzheimer disease amyloid protein) (Cerebra vascular amyloid peptide) (CVAP) (Protease nexin-II) (PN-II) (APPI) (PreA4) [Contains: Soluble APP-alpha (S-APP-alpha); Soluble APP-beta (S-APP | A4_HUMAN    | 86923 | 100% | 3  | 3  | 5   | 5.19%  |
| ARO-p65 | (P05362) Intercellular adhesion molecule 1 precursor (ICAM-1) (Major group rhinovirus receptor) (CD54 antigen)                                                                                                                                       | ICAM1_HUMAN | 57807 | 100% | 5  | 5  | 10  | 12.80% |
| ARO-p65 | (P05455) Lupus La protein (Sjogren syndrome type B antigen) (SS-B) (La ribonucleoprotein) (La autoantigen)                                                                                                                                           | LA_HUMAN    | 46821 | 100% | 2  | 2  | 4   | 7.84%  |
| ARO-p65 | (P05556) Integrin beta-1 precursor (Fibronectin receptor beta subunit) (Integrin VLA-4 beta subunit) (CD29 antigen)                                                                                                                                  | ITB1_HUMAN  | 88447 | 100% | 18 | 22 | 64  | 31.20% |
| ARO-p65 | (P05787) Keratin, type II cytoskeletal 8 (Cytokeratin-8) (CK-8) (Keratin-8) (K8)                                                                                                                                                                     | K2C8_HUMAN  | 53557 | 100% | 2  | 2  | 4   | 4.77%  |
| ARO-p65 | (P06280) Alpha-galactosidase A precursor (EC 3.2.1.22) (Melibiase) (Alpha-D-galactoside galactohydrolase) (Alpha-D-galactosidase A) (Agalsidase alfa)                                                                                                | AGAL_HUMAN  | 48750 | 100% | 2  | 3  | 3   | 8.16%  |
| ARO-p65 | (P06703) Protein S100-A6 (S100 calcium-binding protein A6) (Calcyclin) (Prolactin receptor-associated protein) (PRA) (Growth factor-inducible protein 2A9) (MLN 4)                                                                                   | S10A6_HUMAN | 10162 | 100% | 2  | 3  | 3   | 28.90% |
| ARO-p65 | (P06733) Alpha-enolase (EC 4.2.1.11) (2-phospho-D-glycerate hydro-lyase) (Non-neural enolase) (NNE) (Enolase 1) (Phosphopyruvate hydratase) (C-myc promoter-binding protein) (MBP-1) (MPB-1) (Plasminogen-binding protein)                           | ENOA_HUMAN  | 47021 | 100% | 10 | 11 | 32  | 41.30% |
| ARO-p65 | (P06744) Glucose-6-phosphate isomerase (EC 5.3.1.9) (GPI) (Phosphoglucose isomerase) (PGI) (Phosphohexose isomerase) (PHI) (Neuroleukin) (NLK) (Sperm antigen 36) (SA-36)                                                                            | G6PI_HUMAN  | 62999 | 100% | 4  | 4  | 8   | 14.40% |
| ARO-p65 | (P06748) Nucleophosmin (NPM) (Nucleolar phosphoprotein B23) (Numatrin) (Nucleolar protein NO38)                                                                                                                                                      | NPM_HUMAN   | 32557 | 100% | 5  | 6  | 17  | 25.90% |
| ARO-p65 | (P06753) Tropomyosin alpha-3 chain (Tropomyosin-3) (Tropomyosin gamma) (hTM5)                                                                                                                                                                        | TPM3_HUMAN  | 32802 | 100% | 2  | 2  | 2   | 8.10%  |
| ARO-p65 | (P06865) Beta-hexosaminidase alpha chain precursor (EC 3.2.1.52) (N-acetyl-beta-glucosaminidase) (Beta-N-acetylhexosaminidase) (Hexosaminidase A)                                                                                                    | HEXA_HUMAN  | 60672 | 100% | 23 | 27 | 108 | 52.70% |
| ARO-p65 | (P07195) L-lactate dehydrogenase B chain (EC 1.1.1.27) (LDH-B) (LDH heart subunit) (LDH-H) (NY-REN-46 antigen)                                                                                                                                       | LDHB_HUMAN  | 36489 | 100% | 3  | 3  | 7   | 12.60% |
| ARO-p65 | (P07237) Protein disulfide-isomerase precursor (EC 5.3.4.1) (PDI) (Prolyl 4-hydroxylase beta subunit) (Cellular thyroid hormone-binding protein) (p55)                                                                                               | PDIA1_HUMAN | 57100 | 100% | 8  | 10 | 21  | 26.20% |
| ARO-p65 | (P07305) Histone H1.0 (H1(0)) (Histone H1')                                                                                                                                                                                                          | H10_HUMAN   | 20715 | 100% | 4  | 5  | 40  | 21.20% |
| ARO-p65 | (P07339) Cathepsin D precursor (EC 3.4.23.5) [Contains: Cathepsin D light chain; Cathepsin D heavy chain]                                                                                                                                            | CATD_HUMAN  | 44535 | 100% | 16 | 21 | 129 | 52.40% |

## Protein Identified Sequence Coverage in ARO

|         |                                                                                                                                                                                                                                                      |             |        |      |    |    |     |        |
|---------|------------------------------------------------------------------------------------------------------------------------------------------------------------------------------------------------------------------------------------------------------|-------------|--------|------|----|----|-----|--------|
| ARO-p65 | (P07355) Annexin A2 (Annexin II) (Lipocortin II) (Calpactin I heavy chain) (Chromobindin-8) (p36) (Protein I) (Placental anticoagulant protein IV) (PAP-IV)                                                                                          | ANXA2_HUMAN | 38457  | 100% | 17 | 24 | 72  | 60.10% |
| ARO-p65 | (P07602) Proactivator polypeptide precursor [Contains: Saposin A (Protein A); Saposin B-Val; Saposin B (Sphingolipid activator protein 1) (SAP-1) (Cerebroside sulfate activator) (CSAct) (Dispersin) (Sulfatide/GM1 activator); Saposin C (Co-beta- | SAP_HUMAN   | 58094  | 100% | 27 | 36 | 282 | 62.40% |
| ARO-p65 | (P07686) Beta-hexosaminidase beta chain precursor (EC 3.2.1.52) (N-acetyl-beta-glucosaminidase) (Beta-N-acetylhexosaminidase) (Hexosaminidase B) (Cervical cancer proto-oncogene 7) (HCC-7) [Contains: Beta-hexosaminidase beta-B chain; Beta-hexos  | HEXB_HUMAN  | 63095  | 100% | 15 | 17 | 101 | 43.90% |
| ARO-p65 | (P07737) Profilin-1 (Profilin I)                                                                                                                                                                                                                     | PROF1_HUMAN | 14905  | 100% | 2  | 2  | 2   | 21.60% |
| ARO-p65 | (P07858) Cathepsin B precursor (EC 3.4.22.1) (Cathepsin B1) (APP secretase) (APPS) [Contains: Cathepsin B light chain; Cathepsin B heavy chain]                                                                                                      | CATB_HUMAN  | 37803  | 100% | 7  | 8  | 48  | 25.40% |
| ARO-p65 | (P07942) Laminin beta-1 chain precursor (Laminin B1 chain)                                                                                                                                                                                           | LAMB1_HUMAN | 198045 | 100% | 6  | 7  | 12  | 7.61%  |
| ARO-p65 | (P08107) Heat shock 70 kDa protein 1 (HSP70.1) (HSP70-1/HSP70-2)                                                                                                                                                                                     | HSP71_HUMAN | 70036  | 100% | 3  | 3  | 3   | 13.90% |
| ARO-p65 | (P08174) Complement decay-accelerating factor precursor (CD55 antigen)                                                                                                                                                                               | DAF_HUMAN   | 41382  | 100% | 3  | 3  | 4   | 16.00% |
| ARO-p65 | (P08195) 4F2 cell-surface antigen heavy chain (4F2hc) (Lymphocyte activation antigen 4F2 large subunit) (4F2 heavy chain antigen) (CD98 antigen)                                                                                                     | 4F2_HUMAN   | 57929  | 100% | 10 | 11 | 26  | 31.60% |
| ARO-p65 | (P08236) Beta-glucuronidase precursor (EC 3.2.1.31) (Beta-G1)                                                                                                                                                                                        | BGLR_HUMAN  | 74699  | 100% | 12 | 12 | 36  | 23.80% |
| ARO-p65 | (P08758) Annexin A5 (Annexin V) (Lipocortin V) (Endonexin II) (Calphobindin I) (CBP-I) (Placental anticoagulant protein I) (PAP-I) (PP4) (Thromboplastin inhibitor) (Vascular anticoagulant-alpha) (VAC-alpha) (Anchurin CII)                        | ANXA5_HUMAN | 35789  | 100% | 14 | 17 | 57  | 53.00% |
| ARO-p65 | (P08865) 40S ribosomal protein SA (p40) (34/67 kDa laminin receptor) (Colon carcinoma laminin-binding protein) (NEM/1CHD4) (Multidrug resistance-associated protein MGr1-Ag)                                                                         | RSSA_HUMAN  | 32705  | 100% | 7  | 7  | 29  | 41.20% |
| ARO-p65 | (P08962) CD63 antigen (Melanoma-associated antigen ME491) (Lysosome-associated membrane glycoprotein 3) (LAMP-3) (Ocular melanoma-associated antigen) (OMA81H) (Granulophysin) (Tetraspanin-30) (Tspan-30)                                           | CD63_HUMAN  | 25487  | 100% | 6  | 8  | 23  | 24.50% |
| ARO-p65 | (P09012) U1 small nuclear ribonucleoprotein A (U1 snRNP protein A) (U1A protein) (U1-A)                                                                                                                                                              | SNRPA_HUMAN | 31131  | 100% | 3  | 4  | 8   | 19.90% |
| ARO-p65 | (P09211) Glutathione S-transferase P (EC 2.5.1.18) (GST class-pi) (GSTP1-1)                                                                                                                                                                          | GSTP1_HUMAN | 23208  | 100% | 3  | 3  | 6   | 26.30% |
| ARO-p65 | (P09429) High mobility group protein B1 (High mobility group protein 1) (HMG-1)                                                                                                                                                                      | HMGB1_HUMAN | 24746  | 100% | 7  | 9  | 35  | 28.50% |
| ARO-p65 | (P09661) U2 small nuclear ribonucleoprotein A' (U2 snRNP-A')                                                                                                                                                                                         | RU2A_HUMAN  | 28399  | 100% | 10 | 12 | 46  | 43.50% |

## Protein Identified Sequence Coverage in ARO

|         |                                                                                                                                                                                                                                                      |             |        |      |    |    |     |        |
|---------|------------------------------------------------------------------------------------------------------------------------------------------------------------------------------------------------------------------------------------------------------|-------------|--------|------|----|----|-----|--------|
| ARO-p65 | (P09668) Cathepsin H precursor (EC 3.4.22.16) [Contains: Cathepsin H mini chain; Cathepsin H heavy chain; Cathepsin H light chain]                                                                                                                   | CATH_HUMAN  | 37360  | 100% | 7  | 8  | 43  | 32.50% |
| ARO-p65 | (P10253) Lysosomal alpha-glucosidase precursor (EC 3.2.1.20) (Acid maltase) (Aglucosidase alfa) [Contains: 76 kDa lysosomal alpha-glucosidase; 70 kDa lysosomal alpha-glucosidase]                                                                   | LYAG_HUMAN  | 105321 | 100% | 25 | 33 | 247 | 38.10% |
| ARO-p65 | (P10619) Lysosomal protective protein precursor (EC 3.4.16.5) (Cathepsin A) (Carboxypeptidase C) (Protective protein for beta-galactosidase) [Contains: Lysosomal protective protein 32 kDa chain; Lysosomal protective protein 20 kDa chain]        | PPGB_HUMAN  | 54450  | 100% | 11 | 13 | 59  | 38.70% |
| ARO-p65 | (P10646) Tissue factor pathway inhibitor precursor (TFPI) (Lipoprotein-associated coagulation inhibitor) (LACI) (Extrinsic pathway inhibitor) (EPI)                                                                                                  | TFPI1_HUMAN | 34998  | 100% | 3  | 3  | 4   | 15.10% |
| ARO-p65 | (P10809) 60 kDa heat shock protein, mitochondrial precursor (Hsp60) (60 kDa chaperonin) (CPN60) (Heat shock protein 60) (HSP-60) (Mitochondrial matrix protein P1) (P60 lymphocyte protein) (HuCHA60)                                                | CH60_HUMAN  | 61038  | 100% | 2  | 3  | 6   | 8.55%  |
| ARO-p65 | (P11021) 78 kDa glucose-regulated protein precursor (GRP 78) (Immunoglobulin heavy chain-binding protein) (BiP) (Endoplasmic reticulum luminal Ca(2+) binding protein grp78)                                                                         | GRP78_HUMAN | 72317  | 100% | 25 | 31 | 185 | 44.60% |
| ARO-p65 | (P11117) Lysosomal acid phosphatase precursor (EC 3.1.3.2) (LAP)                                                                                                                                                                                     | PPAL_HUMAN  | 48299  | 100% | 7  | 9  | 19  | 23.20% |
| ARO-p65 | (P11166) Solute carrier family 2, facilitated glucose transporter member 1 (Glucose transporter type 1, erythrocyte/brain) (HepG2 glucose transporter)                                                                                               | GTR1_HUMAN  | 54101  | 100% | 9  | 11 | 44  | 16.70% |
| ARO-p65 | (P11279) Lysosome-associated membrane glycoprotein 1 precursor (LAMP-1) (CD107a antigen)                                                                                                                                                             | LAMP1_HUMAN | 44756  | 100% | 9  | 10 | 41  | 34.90% |
| ARO-p65 | (P11717) Cation-independent mannose-6-phosphate receptor precursor (CI Man-6-P receptor) (CI-MPR) (M6PR) (Insulin-like growth factor 2 receptor) (Insulin-like growth factor II receptor) (IGF-II receptor) (M6P/IGF2 receptor) (M6P/IGF2R) (300 kD) | MPRI_HUMAN  | 274256 | 100% | 10 | 10 | 12  | 8.19%  |
| ARO-p65 | (P12830) Epithelial-cadherin precursor (E-cadherin) (Uvomorulin) (Cadherin-1) (CAM 120/80) (CD324 antigen) [Contains: E-Cad/CTF1; E-Cad/CTF2; E-Cad/CTF3]                                                                                            | CADH1_HUMAN | 97440  | 100% | 5  | 5  | 9   | 7.94%  |
| ARO-p65 | (P13284) Gamma-interferon-inducible lysosomal thiol reductase precursor (Gamma-interferon-inducible protein IP-30)                                                                                                                                   | GILT_HUMAN  | 29131  | 100% | 5  | 6  | 19  | 47.50% |
| ARO-p65 | (P13473) Lysosome-associated membrane glycoprotein 2 precursor (LAMP-2) (CD107b antigen)                                                                                                                                                             | LAMP2_HUMAN | 44943  | 100% | 8  | 10 | 54  | 36.80% |
| ARO-p65 | (P13667) Protein disulfide-isomerase A4 precursor (EC 5.3.4.1) (Protein ERp-72) (ERp72)                                                                                                                                                              | PDIA4_HUMAN | 72916  | 100% | 27 | 32 | 169 | 44.20% |

## Protein Identified Sequence Coverage in ARO

|         |                                                                                                                                                                                                                                                      |                |       |      |    |    |     |        |
|---------|------------------------------------------------------------------------------------------------------------------------------------------------------------------------------------------------------------------------------------------------------|----------------|-------|------|----|----|-----|--------|
| ARO-p65 | (P13987) CD59 glycoprotein precursor (Membrane attack complex inhibition factor) (MACIF) (MAC-inhibitory protein) (MAC-IP) (Protectin) (MEM43 antigen) (Membrane inhibitor of reactive lysis) (MIRL) (20 kDa homologous restriction factor) (HRF-20) | CD59_HUMAN     | 14159 | 100% | 5  | 8  | 134 | 32.00% |
| ARO-p65 | (P14314) Glucosidase 2 beta subunit precursor (Glucosidase II beta subunit) (Protein kinase C substrate, 60.1 kDa protein, heavy chain) (PKCSH) (80K-H protein)                                                                                      | GLU2B_HUMAN    | 59279 | 100% | 17 | 22 | 104 | 45.90% |
| ARO-p65 | (P14618) Pyruvate kinase isozymes M1/M2 (EC 2.7.1.40) (Pyruvate kinase muscle isozyme) (Cytosolic thyroid hormone-binding protein) (CTHBP) (THBP1)                                                                                                   | KPYM_HUMAN     | 57788 | 100% | 5  | 6  | 8   | 16.60% |
| ARO-p65 | (P14625) Endoplasmic precursor (Heat shock protein 90 kDa beta member 1) (94 kDa glucose-regulated protein) (GRP94) (gp96 homolog) (Tumor rejection antigen 1)                                                                                       | ENPL_HUMAN     | 92454 | 100% | 4  | 5  | 9   | 7.97%  |
| ARO-p65 | (P14678) Small nuclear ribonucleoprotein-associated proteins B and B' (snRNP-B) (Sm protein B/B') (Sm-B/Sm-B') (SmB/SmB')                                                                                                                            | RSMB_HUMAN,RSN | 24593 | 100% | 2  | 2  | 9   | 9.58%  |
| ARO-p65 | (P15151) Poliovirus receptor precursor (Nectin-like protein 5) (Nect-5) (CD155 antigen)                                                                                                                                                              | PVR_HUMAN      | 45284 | 100% | 3  | 3  | 5   | 9.35%  |
| ARO-p65 | (P15289) Arylsulfatase A precursor (EC 3.1.6.8) (ASA) (Cerebrosidase-sulfatase) [Contains: Arylsulfatase A component B; Arylsulfatase A component C]                                                                                                 | ARSA_HUMAN     | 53571 | 100% | 2  | 2  | 7   | 8.09%  |
| ARO-p65 | (P15529) Membrane cofactor protein precursor (Trophoblast leukocyte common antigen) (TLX) (CD46 antigen)                                                                                                                                             | MCP_HUMAN      | 43730 | 100% | 4  | 7  | 20  | 17.60% |
| ARO-p65 | (P15531) Nucleoside diphosphate kinase A (EC 2.7.4.6) (NDK A) (NDP kinase A) (Tumor metastatic process-associated protein) (Metastasis inhibition factor nm23) (nm23-H1) (Granzyme A-activated DNase) (GAAD)                                         | NDKA_HUMAN     | 17131 | 100% | 2  | 3  | 5   | 38.20% |
| ARO-p65 | (P15559) NAD(P)H dehydrogenase [quinone] 1 (EC 1.6.5.2) (Quinone reductase 1) (NAD(P)H:quinone oxidoreductase 1) (QR1) (DT-diaphorase) (DTD) (Azoreductase) (Phylloquinone reductase) (Menadione reductase)                                          | NQO1_HUMAN     | 30851 | 100% | 2  | 3  | 5   | 14.20% |
| ARO-p65 | (P15586) N-acetylglucosamine-6-sulfatase precursor (EC 3.1.6.14) (G6S) (Glucosamine-6-sulfatase)                                                                                                                                                     | GL6S_HUMAN     | 62066 | 100% | 11 | 12 | 40  | 29.50% |
| ARO-p65 | (P15880) 40S ribosomal protein S2 (S4) (LLRep3 protein)                                                                                                                                                                                              | RS2_HUMAN      | 31307 | 100% | 4  | 5  | 15  | 16.70% |
| ARO-p65 | (P16070) CD44 antigen precursor (Phagocytic glycoprotein I) (PGP-1) (HUTCH-I) (Extracellular matrix receptor-III) (ECMR-III) (GP90 lymphocyte homing/adhesion receptor) (Hermes antigen) (Hyaluronate receptor) (Heparan sulfate proteoglycan (Epi)  | CD44_HUMAN     | 81535 | 100% | 11 | 12 | 145 | 17.70% |
| ARO-p65 | (P16278) Beta-galactosidase precursor (EC 3.2.1.23) (Lactase) (Acid beta-galactosidase)                                                                                                                                                              | BGAL_HUMAN     | 76076 | 100% | 13 | 15 | 53  | 25.70% |
| ARO-p65 | (P16401) Histone H1.5 (Histone H1a)                                                                                                                                                                                                                  | H15_HUMAN      | 22433 | 100% | 3  | 3  | 21  | 10.70% |
| ARO-p65 | (P16402) Histone H1.3 (Histone H1c)                                                                                                                                                                                                                  | H13_HUMAN      | 22202 | 100% | 4  | 4  | 24  | 15.00% |

## Protein Identified Sequence Coverage in ARO

|         |                                                                                                                                                                                                                                                    |             |        |      |    |    |    |        |
|---------|----------------------------------------------------------------------------------------------------------------------------------------------------------------------------------------------------------------------------------------------------|-------------|--------|------|----|----|----|--------|
| ARO-p65 | (P16422) Tumor-associated calcium signal transducer 1 precursor (Major gastrointestinal tumor-associated protein GA733-2) (Epithelial cell surface antigen) (Epithelial glycoprotein) (EGP) (Adenocarcinoma-associated antigen) (KSA) (KS 1/4 anti | TACD1_HUMAN | 34902  | 100% | 7  | 10 | 68 | 35.70% |
| ARO-p65 | (P17050) Alpha-N-acetylgalactosaminidase precursor (EC 3.2.1.49) (Alpha-galactosidase B)                                                                                                                                                           | NAGAB_HUMAN | 46548  | 100% | 3  | 3  | 3  | 10.90% |
| ARO-p65 | (P17174) Aspartate aminotransferase, cytoplasmic (EC 2.6.1.1) (Transaminase A) (Glutamate oxaloacetate transaminase 1)                                                                                                                             | AATC_HUMAN  | 46099  | 100% | 3  | 3  | 11 | 13.10% |
| ARO-p65 | (P17301) Integrin alpha-2 precursor (Platelet membrane glycoprotein Ia) (GPIa) (Collagen receptor (VLA-2 alpha chain) (CD49b antigen)                                                                                                              | ITA2_HUMAN  | 129280 | 100% | 20 | 22 | 61 | 32.20% |
| ARO-p65 | (P17900) Ganglioside GM2 activator precursor (GM2-AP) (Cerebroside sulfate activator protein) (Shingolipid activator protein 3) (SAP-3) [Contains: Ganglioside GM2 activator isoform short]                                                        | SAP3_HUMAN  | 20805  | 100% | 2  | 2  | 3  | 28.00% |
| ARO-p65 | (P18084) Integrin beta-5 precursor                                                                                                                                                                                                                 | ITB5_HUMAN  | 88037  | 100% | 9  | 11 | 23 | 17.30% |
| ARO-p65 | (P18621) 60S ribosomal protein L17 (L23)                                                                                                                                                                                                           | RL17_HUMAN  | 21248  | 100% | 4  | 5  | 22 | 27.30% |
| ARO-p65 | (P18859) ATP synthase coupling factor 6, mitochondrial precursor (EC 3.6.3.14) (ATPase subunit F6)                                                                                                                                                 | ATP5J_HUMAN | 12570  | 100% | 2  | 2  | 3  | 26.90% |
| ARO-p65 | (P19075) Tetraspanin-8 (Tspan-8) (Transmembrane 4 superfamily member 3) (Tumor-associated antigen CO-029)                                                                                                                                          | TSN8_HUMAN  | 26027  | 100% | 4  | 6  | 66 | 23.20% |
| ARO-p65 | (P19338) Nucleolin (Protein C23)                                                                                                                                                                                                                   | NUCL_HUMAN  | 76467  | 100% | 8  | 9  | 13 | 16.40% |
| ARO-p65 | (P19440) Gamma-glutamyltranspeptidase 1 precursor (EC 2.3.2.2) (Gamma-glutamyltransferase 1) (CD224 antigen) [Contains: Gamma-glutamyltranspeptidase 1 heavy chain; Gamma-glutamyltranspeptidase 1 light chain]                                    | GGT1_HUMAN  | 61393  | 100% | 3  | 4  | 9  | 7.38%  |
| ARO-p65 | (P20290) Transcription factor BTF3 (RNA polymerase B transcription factor 3)                                                                                                                                                                       | BTF3_HUMAN  | 22150  | 100% | 2  | 2  | 2  | 24.30% |
| ARO-p65 | (P20618) Proteasome subunit beta type 1 (EC 3.4.25.1) (Proteasome component C5) (Macropain subunit C5) (Multicatalytic endopeptidase complex subunit C5) (Proteasome gamma chain)                                                                  | PSB1_HUMAN  | 26473  | 100% | 4  | 4  | 5  | 28.60% |
| ARO-p65 | (P20674) Cytochrome c oxidase polypeptide Va, mitochondrial precursor (EC 1.9.3.1)                                                                                                                                                                 | COX5A_HUMAN | 16757  | 100% | 2  | 2  | 3  | 30.00% |
| ARO-p65 | (P20933) N(4)-(beta-N-acetylglucosaminy)-L-asparaginase precursor (EC 3.5.1.26) (Glycosylasparaginase) (Aspartylglucosaminidase) (N4-(N-acetyl-beta-glucosaminy)-L-asparagine amidase) (AGA) [Contains: Glycosylasparaginase alpha chain; Glycosy  | ASPG_HUMAN  | 37176  | 100% | 2  | 2  | 5  | 12.40% |
| ARO-p65 | (P21589) 5'-nucleotidase precursor (EC 3.1.3.5) (Ecto-5'-nucleotidase) (5'-NT) (CD73 antigen)                                                                                                                                                      | 5NTD_HUMAN  | 63351  | 100% | 4  | 4  | 9  | 14.50% |
| ARO-p65 | (P21926) CD9 antigen (p24) (Leukocyte antigen MIC3) (Motility-related protein) (MRP-1) (Tetraspanin-29) (Tspan-29)                                                                                                                                 | CD9_HUMAN   | 25268  | 100% | 2  | 3  | 12 | 15.40% |

## Protein Identified Sequence Coverage in ARO

|         |                                                                                                                                                                                                                                                    |             |        |      |    |    |     |        |
|---------|----------------------------------------------------------------------------------------------------------------------------------------------------------------------------------------------------------------------------------------------------|-------------|--------|------|----|----|-----|--------|
| ARO-p65 | (P22234) Multifunctional protein ADE2 [Includes: Phosphoribosylaminoimidazole-succinocarboxamide synthase (EC 6.3.2.6) (SAICAR synthetase); Phosphoribosylaminoimidazole carboxylase (EC 4.1.1.21) (AIR carboxylase) (AIRC)]                       | PUR6_HUMAN  | 46931  | 100% | 3  | 4  | 7   | 13.90% |
| ARO-p65 | (P22307) Nonspecific lipid-transfer protein (EC 2.3.1.176) (Propanoyl-CoA C-acyltransferase) (NSLTP) (Sterol carrier protein 2) (SCP-2) (Sterol carrier protein X) (SCP-X) (SCP-chi) (SCPX)                                                        | NLTP_HUMAN  | 58977  | 100% | 5  | 5  | 19  | 7.68%  |
| ARO-p65 | (P22392) Nucleoside diphosphate kinase B (EC 2.7.4.6) (NDK B) (NDP kinase B) (nm23-H2) (C-myc purine-binding transcription factor PUF)                                                                                                             | NDKB_HUMAN  | 17280  | 100% | 4  | 6  | 31  | 41.40% |
| ARO-p65 | (P23229) Integrin alpha-6 precursor (VLA-6) (CD49f antigen) [Contains: Integrin alpha-6 heavy chain; Integrin alpha-6 light chain]                                                                                                                 | ITA6_HUMAN  | 126604 | 100% | 7  | 8  | 10  | 13.70% |
| ARO-p65 | (P23284) Peptidyl-prolyl cis-trans isomerase B precursor (EC 5.2.1.8) (PPIase) (Rotamase) (Cyclophilin B) (S-cyclophilin) (SCYLP) (CYP-S1)                                                                                                         | PPIB_HUMAN  | 22725  | 100% | 3  | 3  | 5   | 16.80% |
| ARO-p65 | (P23396) 40S ribosomal protein S3                                                                                                                                                                                                                  | RS3_HUMAN   | 26671  | 100% | 4  | 4  | 14  | 26.70% |
| ARO-p65 | (P23511) Nuclear transcription factor Y subunit alpha (Nuclear transcription factor Y subunit A) (NF-YA) (CAAT-box DNA-binding protein subunit A)                                                                                                  | NFYA_HUMAN  | 36856  | 100% | 2  | 2  | 2   | 12.10% |
| ARO-p65 | (P23528) Cofilin-1 (Cofilin, non-muscle isoform) (18 kDa phosphoprotein) (p18)                                                                                                                                                                     | COF1_HUMAN  | 18354  | 100% | 2  | 2  | 4   | 17.00% |
| ARO-p65 | (P25815) Protein S100-P (S100 calcium-binding protein P)                                                                                                                                                                                           | S100P_HUMAN | 10382  | 100% | 3  | 3  | 4   | 42.10% |
| ARO-p65 | (P26006) Integrin alpha-3 precursor (Galactoprotein B3) (GAPB3) (VLA-3 alpha chain) (FRP-2) (CD49c antigen) [Contains: Integrin alpha-3 heavy chain; Integrin alpha-3 light chain]                                                                 | ITA3_HUMAN  | 118682 | 100% | 6  | 7  | 10  | 8.72%  |
| ARO-p65 | (P26373) 60S ribosomal protein L13 (Breast basic conserved protein 1)                                                                                                                                                                              | RL13_HUMAN  | 24113  | 100% | 3  | 3  | 8   | 15.70% |
| ARO-p65 | (P26583) High mobility group protein B2 (High mobility group protein 2) (HMG-2)                                                                                                                                                                    | HMGB2_HUMAN | 23885  | 100% | 4  | 6  | 13  | 25.00% |
| ARO-p65 | (P26599) Polypyrimidine tract-binding protein 1 (PTB) (Heterogeneous nuclear ribonucleoprotein I) (hnRNP I) (57 kDa RNA-binding protein PPTB-1)                                                                                                    | PTBP1_HUMAN | 57205  | 100% | 2  | 3  | 4   | 8.85%  |
| ARO-p65 | (P26885) FK506-binding protein 2 precursor (EC 5.2.1.8) (Peptidyl-prolyl cis-trans isomerase) (PPIase) (Rotamase) (13 kDa FKBP) (FKBP-13)                                                                                                          | FKBP2_HUMAN | 15632  | 100% | 2  | 3  | 5   | 28.20% |
| ARO-p65 | (P27487) Dipeptidyl peptidase 4 (EC 3.4.14.5) (Dipeptidyl peptidase IV) (DPP IV) (T-cell activation antigen CD26) (TP103) (Adenosine deaminase complexing protein 2) (ADABP) [Contains: Dipeptidyl peptidase 4 membrane form (Dipeptidyl peptidase | DPP4_HUMAN  | 88263  | 100% | 25 | 28 | 100 | 35.50% |
| ARO-p65 | (P27695) DNA-(apurinic or apyrimidinic site) lyase (EC 4.2.99.18) (AP endonuclease 1) (APEX nuclease) (APEN) (REF-1 protein)                                                                                                                       | APEX1_HUMAN | 35407  | 100% | 8  | 9  | 32  | 42.00% |

## Protein Identified Sequence Coverage in ARO

|         |                                                                                                                                                                                                                                                      |             |       |      |    |    |    |        |
|---------|------------------------------------------------------------------------------------------------------------------------------------------------------------------------------------------------------------------------------------------------------|-------------|-------|------|----|----|----|--------|
| ARO-p65 | (P27701) CD82 antigen (Inducible membrane protein R2) (C33 antigen) (IA4) (Metastasis suppressor Kangai 1) (Suppressor of tumorigenicity-6) (Tetraspanin-27) (Tspan-27)                                                                              | CD82_HUMAN  | 29608 | 100% | 2  | 2  | 2  | 8.24%  |
| ARO-p65 | (P27797) Calreticulin precursor (CRP55) (Calregulin) (HACBP) (ERp60) (grp60)                                                                                                                                                                         | CRTC_HUMAN  | 48125 | 100% | 7  | 9  | 30 | 35.50% |
| ARO-p65 | (P28799) Granulins precursor (Proepithelin) (PEPI) [Contains: Acrogranin; Paragranulin; Granulin-1 (Granulin G); Granulin-2 (Granulin F); Granulin-3 (Granulin B); Granulin-4 (Granulin A); Granulin-5 (Granulin C); Granulin-6 (Granulin D); Granul | GRN_HUMAN   | 63522 | 100% | 9  | 9  | 19 | 21.80% |
| ARO-p65 | (P29401) Transketolase (EC 2.2.1.1) (TK)                                                                                                                                                                                                             | TKT_HUMAN   | 67861 | 100% | 5  | 5  | 15 | 18.60% |
| ARO-p65 | (P30040) Endoplasmic reticulum protein ERp29 precursor (ERp31) (ERp28)                                                                                                                                                                               | ERP29_HUMAN | 28977 | 100% | 8  | 9  | 27 | 47.10% |
| ARO-p65 | (P30041) Peroxiredoxin-6 (EC 1.11.1.15) (Antioxidant protein 2) (1-Cys peroxiredoxin) (1-Cys PRX) (Acidic calcium-independent phospholipase A2) (EC 3.1.1.-) (aiPLA2) (Non-selenium glutathione peroxidase) (EC 1.11.1.7) (NSGPx) (24 kDa protein)   | PRDX6_HUMAN | 24887 | 100% | 7  | 10 | 21 | 48.40% |
| ARO-p65 | (P30044) Peroxiredoxin-5, mitochondrial precursor (EC 1.11.1.15) (Prx-V) (Peroxisomal antioxidant enzyme) (PLP) (Thioredoxin reductase) (Thioredoxin peroxidase PMP20) (Antioxidant enzyme B166) (AOEB166) (TPx type VI) (Liver tissue 2D-page spo   | PRDX5_HUMAN | 22008 | 100% | 2  | 2  | 4  | 18.70% |
| ARO-p65 | (P30048) Thioredoxin-dependent peroxide reductase, mitochondrial precursor (EC 1.11.1.15) (Peroxiredoxin 3) (Antioxidant protein 1) (AOP-1) (MER5 protein homolog) (HBC189) (PRX III)                                                                | PRDX3_HUMAN | 27675 | 100% | 3  | 3  | 11 | 21.90% |
| ARO-p65 | (P30050) 60S ribosomal protein L12                                                                                                                                                                                                                   | RL12_HUMAN  | 17801 | 100% | 4  | 6  | 25 | 40.00% |
| ARO-p65 | (P30101) Protein disulfide-isomerase A3 precursor (EC 5.3.4.1) (Disulfide isomerase ER-60) (ERp60) (58 kDa microsomal protein) (p58) (ERp57) (58 kDa glucose-regulated protein)                                                                      | PDIA3_HUMAN | 56767 | 100% | 17 | 20 | 48 | 40.80% |
| ARO-p65 | (P30533) Alpha-2-macroglobulin receptor-associated protein precursor (Alpha-2-MRAP) (Low density lipoprotein receptor-related protein-associated protein 1) (RAP)                                                                                    | AMRP_HUMAN  | 41450 | 100% | 3  | 5  | 13 | 12.60% |
| ARO-p65 | (P30740) Leukocyte elastase inhibitor (LEI) (Serpine B1) (Monocyte/neutrophil elastase inhibitor) (M/NEI) (EI)                                                                                                                                       | ILEU_HUMAN  | 42726 | 100% | 4  | 4  | 6  | 20.60% |
| ARO-p65 | (P31040) Succinate dehydrogenase [ubiquinone] flavoprotein subunit, mitochondrial precursor (EC 1.3.5.1) (Fp) (Flavoprotein subunit of complex II)                                                                                                   | DHSA_HUMAN  | 72674 | 100% | 2  | 2  | 2  | 6.02%  |
| ARO-p65 | (P31949) Protein S100-A11 (S100 calcium-binding protein A11) (Protein S100C) (Calgizzarin) (MLN 70)                                                                                                                                                  | S10AB_HUMAN | 11723 | 100% | 3  | 3  | 6  | 34.30% |
| ARO-p65 | (P34059) N-acetylgalactosamine-6-sulfatase precursor (EC 3.1.6.4) (N-acetylgalactosamine-6-sulfate sulfatase) (Galactose-6-sulfate sulfatase) (GalNAc6S sulfatase) (Chondroitinsulfatase) (Chondroitinase)                                           | GA6S_HUMAN  | 58009 | 100% | 7  | 7  | 20 | 19.70% |

## Protein Identified Sequence Coverage in ARO

|         |                                                                                                                                                                                                                                                    |             |        |      |    |    |     |        |
|---------|----------------------------------------------------------------------------------------------------------------------------------------------------------------------------------------------------------------------------------------------------|-------------|--------|------|----|----|-----|--------|
| ARO-p65 | (P35268) 60S ribosomal protein L22 (Epstein-Barr virus small RNA-associated protein) (EBER-associated protein) (EAP) (Heparin-binding protein HBp15)                                                                                               | RL22_HUMAN  | 14638  | 100% | 2  | 2  | 2   | 22.00% |
| ARO-p65 | (P35527) Keratin, type I cytoskeletal 9 (Cytokeratin-9) (CK-9) (Keratin-9) (K9)                                                                                                                                                                    | K1C9_HUMAN  | 62113  | 100% | 5  | 5  | 9   | 16.10% |
| ARO-p65 | (P35579) Myosin-9 (Myosin heavy chain, nonmuscle IIa) (Nonmuscle myosin heavy chain IIa) (NMMHC II-a) (NMMHC-IIA) (Cellular myosin heavy chain, type A) (Nonmuscle myosin heavy chain-A) (NMMHC-A)                                                 | MYH9_HUMAN  | 226388 | 100% | 5  | 7  | 10  | 5.72%  |
| ARO-p65 | (P35613) Basigin precursor (Leukocyte activation antigen M6) (Collagenase stimulatory factor) (Extracellular matrix metalloproteinase inducer) (EMMPRIN) (5F7) (Tumor cell-derived collagenase stimulatory factor) (TCSF) (OK blood group antigen) | BASI_HUMAN  | 42182  | 100% | 11 | 17 | 116 | 42.60% |
| ARO-p65 | (P35908) Keratin, type II cytoskeletal 2 epidermal (Cytokeratin-2e) (K2e) (CK 2e)                                                                                                                                                                  | K22E_HUMAN  | 65848  | 100% | 2  | 2  | 2   | 9.15%  |
| ARO-p65 | (P36578) 60S ribosomal protein L4 (L1)                                                                                                                                                                                                             | RL4_HUMAN   | 47550  | 100% | 8  | 8  | 23  | 20.20% |
| ARO-p65 | (P37108) Signal recognition particle 14 kDa protein (SRP14) (18 kDa Alu RNA-binding protein)                                                                                                                                                       | SRP14_HUMAN | 14527  | 100% | 3  | 3  | 4   | 39.00% |
| ARO-p65 | (P37802) Transgelin-2 (SM22-alpha homolog)                                                                                                                                                                                                         | TAGL2_HUMAN | 22243  | 100% | 5  | 5  | 12  | 33.30% |
| ARO-p65 | (P37837) Transaldolase (EC 2.2.1.2)                                                                                                                                                                                                                | TALDO_HUMAN | 37524  | 100% | 14 | 16 | 61  | 38.30% |
| ARO-p65 | (P39019) 40S ribosomal protein S19                                                                                                                                                                                                                 | RS19_HUMAN  | 15911  | 100% | 4  | 4  | 6   | 22.90% |
| ARO-p65 | (P42167) Lamina-associated polypeptide 2, isoforms beta/gamma (Thymopoietin, isoforms beta/gamma) (TP beta/gamma) (Thymopoietin-related peptide isoforms beta/gamma) (TPRP isoforms beta/gamma) [Contains: Thymopoietin (TP) (Splenin); Thymopenti | LAP2B_HUMAN | 50522  | 100% | 6  | 6  | 15  | 24.70% |
| ARO-p65 | (P43121) Cell surface glycoprotein MUC18 precursor (Melanoma-associated antigen MUC18) (Melanoma cell adhesion molecule) (Melanoma-associated antigen A32) (S-endo 1 endothelial-associated antigen) (Cell surface glycoprotein P1H12) (CD146 anti | MUC18_HUMAN | 71589  | 100% | 5  | 5  | 9   | 16.60% |
| ARO-p65 | (P43251) Biotinidase precursor (EC 3.5.1.12)                                                                                                                                                                                                       | BTD_HUMAN   | 58896  | 100% | 2  | 3  | 6   | 5.74%  |
| ARO-p65 | (P43490) Nicotinamide phosphoribosyltransferase (EC 2.4.2.12) (NAmPRTase) (Nampt) (Pre-B cell-enhancing factor) (Pre-B-cell colony-enhancing factor 1) (Visfatin)                                                                                  | NAMPT_HUMAN | 55505  | 100% | 7  | 7  | 16  | 30.10% |
| ARO-p65 | (P46778) 60S ribosomal protein L21                                                                                                                                                                                                                 | RL21_HUMAN  | 18416  | 100% | 5  | 7  | 34  | 28.30% |
| ARO-p65 | (P46782) 40S ribosomal protein S5                                                                                                                                                                                                                  | RS5_HUMAN   | 22728  | 100% | 3  | 4  | 13  | 23.60% |
| ARO-p65 | (P46783) 40S ribosomal protein S10                                                                                                                                                                                                                 | RS10_HUMAN  | 18880  | 100% | 2  | 2  | 4   | 13.90% |
| ARO-p65 | (P46976) Glycogenin-1 (EC 2.4.1.186)                                                                                                                                                                                                               | GLYG_HUMAN  | 39235  | 100% | 2  | 2  | 7   | 11.70% |
| ARO-p65 | (P47755) F-actin capping protein alpha-2 subunit (CapZ alpha-2)                                                                                                                                                                                    | CAZA2_HUMAN | 32800  | 100% | 2  | 2  | 2   | 15.40% |
| ARO-p65 | (P48509) CD151 antigen (Platelet-endothelial tetraspan antigen 3) (PETA-3) (GP27) (Membrane glycoprotein SFA-1) (Tetraspanin-24) (Tspan-24)                                                                                                        | CD151_HUMAN | 28277  | 100% | 2  | 2  | 4   | 16.20% |
| ARO-p65 | (P48960) CD97 antigen precursor (Leukocyte antigen CD97)                                                                                                                                                                                           | CD97_HUMAN  | 91852  | 100% | 2  | 2  | 2   | 7.31%  |



## Protein Identified Sequence Coverage in ARO

|         |                                                                                                                                                                                                                                                     |             |        |      |    |    |     |        |
|---------|-----------------------------------------------------------------------------------------------------------------------------------------------------------------------------------------------------------------------------------------------------|-------------|--------|------|----|----|-----|--------|
| ARO-p65 | (P49006) MARCKS-related protein (MARCKS-like protein 1) (Macrophage myristoylated alanine-rich C kinase substrate) (Mac-MARCKS) (MacMARCKS)                                                                                                         | MRP_HUMAN   | 19379  | 100% | 2  | 2  | 3   | 37.10% |
| ARO-p65 | (P50454) Collagen-binding protein 2 precursor (Colligin 2) (Rheumatoid arthritis-related antigen RA-A47) (Serp1 H2)                                                                                                                                 | SPH2_HUMAN  | 46424  | 100% | 3  | 3  | 5   | 15.10% |
| ARO-p65 | (P50895) Lutheran blood group glycoprotein precursor (B-CAM cell surface glycoprotein) (Auberger B antigen) (F8/G253 antigen)                                                                                                                       | LU_HUMAN    | 67386  | 100% | 12 | 13 | 22  | 30.40% |
| ARO-p65 | (P50897) Palmitoyl-protein thioesterase 1 precursor (EC 3.1.2.22) (Palmitoyl-protein hydrolase 1)                                                                                                                                                   | PPT1_HUMAN  | 34176  | 100% | 6  | 7  | 22  | 34.60% |
| ARO-p65 | (P50914) 60S ribosomal protein L14 (CAG-ISL 7)                                                                                                                                                                                                      | RL14_HUMAN  | 23141  | 100% | 2  | 2  | 7   | 10.80% |
| ARO-p65 | (P51572) B-cell receptor-associated protein 31 (BCR-associated protein Bap31) (p28 Bap31) (CDM protein) (6C6-AG tumor-associated antigen) (DXS1357E)                                                                                                | BAP31_HUMAN | 27843  | 100% | 4  | 4  | 7   | 14.30% |
| ARO-p65 | (P51610) Host cell factor (HCF) (HCF-1) (C1 factor) (VP16 accessory protein) (VCAF) (CFF) [Contains: HCF N-terminal chain 1; HCF N-terminal chain 2; HCF N-terminal chain 3; HCF N-terminal chain 4; HCF N-terminal chain 5; HCF N-terminal chain   | HCFC1_HUMAN | 208816 | 100% | 7  | 9  | 18  | 6.88%  |
| ARO-p65 | (P51665) 26S proteasome non-ATPase regulatory subunit 7 (26S proteasome regulatory subunit rpn8) (26S proteasome regulatory subunit S12) (Proteasome subunit p40) (Mov34 protein homolog)                                                           | PSD7_HUMAN  | 37008  | 100% | 2  | 2  | 2   | 8.64%  |
| ARO-p65 | (P53367) Arfaptin-1 (ADP-ribosylation factor-interacting protein 1)                                                                                                                                                                                 | ARFP1_HUMAN | 41722  | 100% | 7  | 7  | 21  | 31.60% |
| ARO-p65 | (P53634) Dipeptidyl-peptidase 1 precursor (EC 3.4.14.1) (Dipeptidyl-peptidase I) (DPP-I) (DPPI) (Cathepsin C) (Cathepsin J) (Dipeptidyl transferase) [Contains: Dipeptidyl-peptidase 1 exclusion domain chain (Dipeptidyl-peptidase I exclusion dom | CATC_HUMAN  | 51824  | 100% | 10 | 13 | 57  | 44.50% |
| ARO-p65 | (P53985) Monocarboxylate transporter 1 (MCT 1)                                                                                                                                                                                                      | MOT1_HUMAN  | 53942  | 100% | 3  | 3  | 11  | 6.00%  |
| ARO-p65 | (P54577) Tyrosyl-tRNA synthetase, cytoplasmic (EC 6.1.1.1) (Tyrosyl--tRNA ligase) (TyrRS)                                                                                                                                                           | SYYC_HUMAN  | 58996  | 100% | 10 | 10 | 26  | 27.70% |
| ARO-p65 | (P54802) Alpha-N-acetylglucosaminidase precursor (EC 3.2.1.50) (N-acetyl-alpha-glucosaminidase) (NAG) [Contains: Alpha-N-acetylglucosaminidase 82 kDa form; Alpha-N-acetylglucosaminidase 77 kDa form]                                              | ANAG_HUMAN  | 82150  | 100% | 2  | 2  | 2   | 4.98%  |
| ARO-p65 | (P54819) Adenylate kinase isoenzyme 2, mitochondrial (EC 2.7.4.3) (ATP-AMP transphosphorylase)                                                                                                                                                      | KAD2_HUMAN  | 26330  | 100% | 7  | 10 | 35  | 41.60% |
| ARO-p65 | (P55145) ARMET protein precursor (Arginine-rich protein)                                                                                                                                                                                            | ARMET_HUMAN | 20240  | 100% | 2  | 3  | 6   | 9.50%  |
| ARO-p65 | (P55327) Tumor protein D52 (N8 protein)                                                                                                                                                                                                             | TPD52_HUMAN | 19845  | 100% | 10 | 14 | 129 | 72.30% |
| ARO-p65 | (P56199) Integrin alpha-1 (Laminin and collagen receptor) (VLA-1) (CD49a antigen)                                                                                                                                                                   | ITA1_HUMAN  | 127823 | 100% | 3  | 3  | 4   | 3.65%  |
| ARO-p65 | (P56537) Eukaryotic translation initiation factor 6 (eIF-6) (B4 integrin interactor) (CAB) (p27(BBP)) (B(2)GCN homolog)                                                                                                                             | IF6_HUMAN   | 26580  | 100% | 3  | 3  | 7   | 27.30% |

## Protein Identified Sequence Coverage in ARO

|         |                                                                                                                                                                                                                                         |                |       |      |   |    |     |        |
|---------|-----------------------------------------------------------------------------------------------------------------------------------------------------------------------------------------------------------------------------------------|----------------|-------|------|---|----|-----|--------|
| ARO-p65 | (P60033) CD81 antigen (26 kDa cell surface protein TAPA-1) (Target of the antiproliferative antibody 1) (Tetraspanin-28) (Tspan-28)                                                                                                     | CD81_HUMAN     | 25792 | 100% | 3 | 4  | 5   | 25.00% |
| ARO-p65 | (P60174) Triosephosphate isomerase (EC 5.3.1.1) (TIM) (Triose-phosphate isomerase)                                                                                                                                                      | TPIS_HUMAN     | 26520 | 100% | 4 | 5  | 8   | 27.80% |
| ARO-p65 | (P60709) Actin, cytoplasmic 1 (Beta-actin)                                                                                                                                                                                              | ACTB_HUMAN,ACT | 41776 | 100% | 8 | 10 | 26  | 34.40% |
| ARO-p65 | (P61106) Ras-related protein Rab-14                                                                                                                                                                                                     | RAB14_HUMAN    | 23748 | 100% | 6 | 6  | 18  | 46.70% |
| ARO-p65 | (P61247) 40S ribosomal protein S3a                                                                                                                                                                                                      | RS3A_HUMAN     | 29796 | 100% | 3 | 3  | 10  | 14.10% |
| ARO-p65 | (P61289) Proteasome activator complex subunit 3 (Proteasome activator 28-gamma subunit) (PA28gamma) (PA28g) (Activator of multicatalytic protease subunit 3) (11S regulator complex gamma subunit) (REG-gamma) (Ki nuclear autoantigen) | PSME3_HUMAN    | 29489 | 100% | 4 | 4  | 8   | 21.70% |
| ARO-p65 | (P61353) 60S ribosomal protein L27                                                                                                                                                                                                      | RL27_HUMAN     | 15649 | 100% | 2 | 2  | 7   | 30.40% |
| ARO-p65 | (P61604) 10 kDa heat shock protein, mitochondrial (Hsp10) (10 kDa chaperonin) (CPN10) (Early-pregnancy factor) (EPF)                                                                                                                    | CH10_HUMAN     | 10783 | 100% | 4 | 5  | 12  | 37.60% |
| ARO-p65 | (P61626) Lysozyme C precursor (EC 3.2.1.17) (1,4-beta-N-acetylmuramidase C)                                                                                                                                                             | LYSC_HUMAN     | 16519 | 100% | 2 | 2  | 7   | 27.00% |
| ARO-p65 | (P61916) Epididymal secretory protein E1 precursor (Niemann-Pick disease type C2 protein) (hE1)                                                                                                                                         | NPC2_HUMAN     | 16552 | 100% | 4 | 5  | 22  | 43.70% |
| ARO-p65 | (P61978) Heterogeneous nuclear ribonucleoprotein K (hnRNP K) (Transformation up-regulated nuclear protein) (TUNP)                                                                                                                       | HNRPK_HUMAN    | 50961 | 100% | 2 | 2  | 4   | 9.07%  |
| ARO-p65 | (P62081) 40S ribosomal protein S7                                                                                                                                                                                                       | RS7_HUMAN      | 22110 | 100% | 4 | 5  | 12  | 36.60% |
| ARO-p65 | (P62258) 14-3-3 protein epsilon (14-3-3E)                                                                                                                                                                                               | 1433E_HUMAN    | 29157 | 100% | 2 | 2  | 6   | 11.40% |
| ARO-p65 | (P62263) 40S ribosomal protein S14                                                                                                                                                                                                      | RS14_HUMAN     | 16124 | 100% | 2 | 2  | 5   | 22.70% |
| ARO-p65 | (P62277) 40S ribosomal protein S13                                                                                                                                                                                                      | RS13_HUMAN     | 17074 | 100% | 4 | 5  | 21  | 26.70% |
| ARO-p65 | (P62304) Small nuclear ribonucleoprotein E (snRNP-E) (Sm protein E) (Sm-E) (SmE)                                                                                                                                                        | RUXE_HUMAN     | 10786 | 100% | 3 | 3  | 10  | 52.20% |
| ARO-p65 | (P62314) Small nuclear ribonucleoprotein Sm D1 (snRNP core protein D1) (Sm-D1) (Sm-D autoantigen)                                                                                                                                       | SMD1_HUMAN     | 13264 | 100% | 2 | 3  | 6   | 27.70% |
| ARO-p65 | (P62316) Small nuclear ribonucleoprotein Sm D2 (snRNP core protein D2) (Sm-D2)                                                                                                                                                          | SMD2_HUMAN     | 13509 | 100% | 3 | 4  | 7   | 23.70% |
| ARO-p65 | (P62424) 60S ribosomal protein L7a (Surfeit locus protein 3) (PLA-X polypeptide)                                                                                                                                                        | RL7A_HUMAN     | 29847 | 100% | 7 | 8  | 31  | 22.60% |
| ARO-p65 | (P62701) 40S ribosomal protein S4, X isoform (Single copy abundant mRNA protein) (SCR10)                                                                                                                                                | RS4X_HUMAN     | 29450 | 100% | 2 | 2  | 5   | 10.70% |
| ARO-p65 | (P62805) Histone H4                                                                                                                                                                                                                     | H4_HUMAN       | 11219 | 100% | 8 | 11 | 358 | 53.90% |
| ARO-p65 | (P62807) Histone H2B.a/g/h/k/l (H2B.1 A) (H2B/a) (H2B/g) (H2B/h) (H2B/k) (H2B/l)                                                                                                                                                        | H2BA_HUMAN,H2B | 13757 | 100% | 8 | 10 | 322 | 60.80% |
| ARO-p65 | (P62847) 40S ribosomal protein S24                                                                                                                                                                                                      | RS24_HUMAN     | 15406 | 100% | 2 | 2  | 7   | 20.30% |
| ARO-p65 | (P62851) 40S ribosomal protein S25                                                                                                                                                                                                      | RS25_HUMAN     | 13725 | 100% | 3 | 3  | 7   | 16.80% |
| ARO-p65 | (P62854) 40S ribosomal protein S26                                                                                                                                                                                                      | RS26_HUMAN     | 12866 | 100% | 4 | 6  | 30  | 37.70% |
| ARO-p65 | (P62888) 60S ribosomal protein L30                                                                                                                                                                                                      | RL30_HUMAN     | 12636 | 100% | 3 | 3  | 9   | 35.10% |
| ARO-p65 | (P62906) 60S ribosomal protein L10a (CSA-19)                                                                                                                                                                                            | RL10A_HUMAN    | 24683 | 100% | 5 | 5  | 13  | 22.70% |
| ARO-p65 | (P62917) 60S ribosomal protein L8                                                                                                                                                                                                       | RL8_HUMAN      | 27876 | 100% | 2 | 2  | 5   | 18.00% |
| ARO-p65 | (P62937) Peptidyl-prolyl cis-trans isomerase A (EC 5.2.1.8) (PP1ase A) (Rotamase A) (Cyclophilin A) (Cyclosporin A-binding protein)                                                                                                     | PPIA_HUMAN     | 17864 | 100% | 5 | 6  | 20  | 32.30% |
| ARO-p65 | (P62988) Ubiquitin                                                                                                                                                                                                                      | UBIQ_HUMAN     | 8547  | 100% | 4 | 4  | 26  | 61.80% |
| ARO-p65 | (P63104) 14-3-3 protein zeta/delta (Protein kinase C inhibitor protein 1) (KCIP-1)                                                                                                                                                      | 1433Z_HUMAN    | 27728 | 100% | 3 | 4  | 6   | 17.60% |

## Protein Identified Sequence Coverage in ARO

|         |                                                                                                                                                                                                                                                     |                |        |      |    |    |    |        |
|---------|-----------------------------------------------------------------------------------------------------------------------------------------------------------------------------------------------------------------------------------------------------|----------------|--------|------|----|----|----|--------|
| ARO-p65 | (P67809) Nuclease sensitive element-binding protein 1 (Y-box-binding protein 1) (Y-box transcription factor) (YB-1) (CCAAT-binding transcription factor I subunit A) (CBF-A) (Enhancer factor I subunit A) (EF1-A) (DNA-binding protein B) (DBPB)   | YBOX1_HUMAN    | 35775  | 100% | 2  | 3  | 8  | 10.50% |
| ARO-p65 | (P68104) Elongation factor 1-alpha 1 (EF-1-alpha-1) (Elongation factor 1 A-1) (eEF1A-1) (Elongation factor Tu) (EF-Tu)                                                                                                                              | EF1A1_HUMAN    | 50123  | 100% | 11 | 15 | 79 | 45.70% |
| ARO-p65 | (P68371) Tubulin beta-2C chain (Tubulin beta-2 chain)                                                                                                                                                                                               | TBB2C_HUMAN,TB | 49653  | 100% | 2  | 3  | 3  | 9.68%  |
| ARO-p65 | (P78417) Glutathione transferase omega-1 (EC 2.5.1.18) (GSTO 1-1)                                                                                                                                                                                   | GSTO1_HUMAN    | 27549  | 100% | 2  | 2  | 3  | 20.70% |
| ARO-p65 | (P80188) Neutrophil gelatinase-associated lipocalin precursor (NGAL) (p25) (25 kDa alpha-2-microglobulin-related subunit of MMP-9) (Lipocalin-2) (Oncogene 24p3)                                                                                    | NGAL_HUMAN     | 22571  | 100% | 8  | 8  | 33 | 54.50% |
| ARO-p65 | (P83731) 60S ribosomal protein L24 (Ribosomal protein L30)                                                                                                                                                                                          | RL24_HUMAN     | 17762  | 100% | 2  | 2  | 7  | 13.40% |
| ARO-p65 | (P84077) ADP-ribosylation factor 1                                                                                                                                                                                                                  | ARF1_HUMAN,ARF | 20548  | 100% | 5  | 5  | 7  | 36.10% |
| ARO-p65 | (P84243) Histone H3.3                                                                                                                                                                                                                               | H33_HUMAN      | 15180  | 100% | 6  | 8  | 59 | 54.80% |
| ARO-p65 | (P98160) Basement membrane-specific heparan sulfate proteoglycan core protein precursor (HSPG) (Perlecan) (PLC)                                                                                                                                     | PGBM_HUMAN     | 468788 | 100% | 7  | 7  | 7  | 2.85%  |
| ARO-p65 | (P98172) Ephrin-B1 precursor (EPH-related receptor tyrosine kinase ligand 2) (LERK-2) (ELK ligand) (ELK-L)                                                                                                                                          | EFNB1_HUMAN    | 37989  | 100% | 3  | 3  | 4  | 15.00% |
| ARO-p65 | (Q00059) Transcription factor A, mitochondrial precursor (mtTFA) (Mitochondrial transcription factor 1) (MtTF1) (Transcription factor 6-like 2)                                                                                                     | TFAM_HUMAN     | 29080  | 100% | 2  | 3  | 4  | 10.20% |
| ARO-p65 | (Q01105) Protein SET (Phosphatase 2A inhibitor I2PP2A) (I-2PP2A) (Template-activating factor I) (TAF-I) (HLA-DR-associated protein II) (PHAPII) (Inhibitor of granzyme A-activated DNase) (IGAAD)                                                   | SET_HUMAN      | 33471  | 100% | 7  | 8  | 36 | 30.30% |
| ARO-p65 | (Q01130) Splicing factor, arginine/serine-rich 2 (Splicing factor SC35) (SC-35) (Splicing component, 35 kDa) (PR264 protein)                                                                                                                        | SFRS2_HUMAN    | 25328  | 100% | 2  | 2  | 3  | 11.40% |
| ARO-p65 | (Q01518) Adenylyl cyclase-associated protein 1 (CAP1)                                                                                                                                                                                               | CAP1_HUMAN     | 51524  | 100% | 3  | 3  | 4  | 15.80% |
| ARO-p65 | (Q02878) 60S ribosomal protein L6 (TAX-responsive enhancer element-binding protein 107) (TAXREB107) (Neoplasm-related protein C140)                                                                                                                 | RL6_HUMAN      | 32580  | 100% | 6  | 6  | 16 | 20.90% |
| ARO-p65 | (Q05519) Splicing factor arginine/serine-rich 11 (Arginine-rich 54 kDa nuclear protein) (p54)                                                                                                                                                       | SFR11_HUMAN    | 53526  | 100% | 3  | 4  | 13 | 10.70% |
| ARO-p65 | (Q05639) Elongation factor 1-alpha 2 (EF-1-alpha-2) (Elongation factor 1 A-2) (eEF1A-2) (Statin S1)                                                                                                                                                 | EF1A2_HUMAN    | 50453  | 100% | 4  | 6  | 27 | 38.40% |
| ARO-p65 | (Q06323) Proteasome activator complex subunit 1 (Proteasome activator 28-alpha subunit) (PA28alpha) (PA28a) (Activator of multicatalytic protease subunit 1) (11S regulator complex alpha subunit) (REG-alpha) (Interferon gamma up-regulated I-51) | PSME1_HUMAN    | 28706  | 100% | 7  | 8  | 25 | 32.90% |

## Protein Identified Sequence Coverage in ARO

|         |                                                                                                                                                                                                                                             |                |        |      |    |    |     |        |
|---------|---------------------------------------------------------------------------------------------------------------------------------------------------------------------------------------------------------------------------------------------|----------------|--------|------|----|----|-----|--------|
| ARO-p65 | (Q06830) Peroxiredoxin-1 (EC 1.11.1.15) (Thioredoxin peroxidase 2) (Thioredoxin-dependent peroxide reductase 2) (Proliferation-associated protein PAG) (Natural killer cell-enhancing factor A) (NKEF-A)                                    | PRDX1_HUMAN    | 22093  | 100% | 7  | 7  | 15  | 37.20% |
| ARO-p65 | (Q07020) 60S ribosomal protein L18                                                                                                                                                                                                          | RL18_HUMAN     | 21486  | 100% | 2  | 2  | 6   | 13.90% |
| ARO-p65 | (Q07021) Complement component 1 Q subcomponent-binding protein, mitochondrial precursor (Glycoprotein gC1qBP) (C1qBP) (GC1q-R protein) (Hyaluronan-binding protein 1) (Mitochondrial matrix protein p32) (p33)                              | C1QBP_HUMAN    | 31345  | 100% | 4  | 7  | 22  | 30.90% |
| ARO-p65 | (Q07812) Apoptosis regulator BAX, membrane isoform alpha                                                                                                                                                                                    | BAXA_HUMAN,BAX | 24203  | 100% | 2  | 2  | 5   | 11.90% |
| ARO-p65 | (Q07955) Splicing factor, arginine/serine-rich 1 (pre-mRNA-splicing factor SF2, P33 subunit) (Alternative splicing factor ASF-1)                                                                                                            | SFRS1_HUMAN    | 27596  | 100% | 2  | 2  | 5   | 14.20% |
| ARO-p65 | (Q08380) Galectin-3-binding protein precursor (Lectin galactoside-binding soluble 3-binding protein) (Mac-2-binding protein) (Mac-2 BP) (MAC2BP) (Tumor-associated antigen 90K)                                                             | LG3BP_HUMAN    | 65314  | 100% | 18 | 26 | 124 | 45.80% |
| ARO-p65 | (Q08431) Lactadherin precursor (Milk fat globule-EGF factor 8) (MFG-E8) (HMFG) (Breast epithelial antigen BA46) (MFGM) [Contains: Lactadherin short form; Medin]                                                                            | MFGM_HUMAN     | 43105  | 100% | 8  | 9  | 23  | 28.20% |
| ARO-p65 | (Q08722) Leukocyte surface antigen CD47 precursor (Integrin-associated protein) (IAP) (Antigenic surface determinant protein OA3) (MER6)                                                                                                    | CD47_HUMAN     | 35197  | 100% | 5  | 6  | 12  | 18.30% |
| ARO-p65 | (Q08945) Structure-specific recognition protein 1 (SSRP1) (Recombination signal sequence recognition protein) (T160) (Chromatin-specific transcription elongation factor 80 kDa subunit) (FACT 80 kDa subunit)                              | SSRP1_HUMAN    | 81060  | 100% | 2  | 3  | 4   | 2.12%  |
| ARO-p65 | (Q09666) Neuroblast differentiation-associated protein AHNK (Desmoyokin) (Fragments)                                                                                                                                                        | AHNK_HUMAN     | 312479 | 100% | 4  | 4  | 8   | 1.99%  |
| ARO-p65 | (Q13427) Peptidyl-prolyl cis-trans isomerase G (EC 5.2.1.8) (Peptidyl-prolyl isomerase G) (PPIase G) (Rotamase G) (Cyclophilin G) (Cik-associating RS-cyclophilin) (CARS-cyclophilin) (CARS-Cyp) (SR-cyclophilin) (SRCyp) (SR-cyp) (CASP10) | PPIG_HUMAN     | 88602  | 100% | 4  | 4  | 6   | 6.50%  |
| ARO-p65 | (Q13428) Treacle protein (Treacher Collins syndrome protein)                                                                                                                                                                                | TCOF_HUMAN     | 144293 | 100% | 6  | 7  | 16  | 5.10%  |
| ARO-p65 | (Q13510) Acid ceramidase precursor (EC 3.5.1.23) (Acylsphingosine deacylase) (N-acylsphingosine amidohydrolase) (AC) (Putative 32 kDa heart protein) (PHP32) [Contains: Acid ceramidase alpha subunit; Acid ceramidase beta subunit]        | ASAH1_HUMAN    | 44633  | 100% | 8  | 8  | 16  | 25.80% |
| ARO-p65 | (Q13523) Serine/threonine-protein kinase PRP4 homolog (EC 2.7.11.1) (PRP4 pre-mRNA-processing factor 4 homolog) (PRP4 kinase)                                                                                                               | PRP4B_HUMAN    | 116961 | 100% | 5  | 6  | 20  | 5.86%  |
| ARO-p65 | (Q13740) CD166 antigen precursor (Activated leukocyte-cell adhesion molecule) (ALCAM)                                                                                                                                                       | CD166_HUMAN    | 65116  | 100% | 5  | 5  | 12  | 20.60% |

## Protein Identified Sequence Coverage in ARO

|         |                                                                                                                                                                                                                                                    |                 |        |      |    |    |     |        |
|---------|----------------------------------------------------------------------------------------------------------------------------------------------------------------------------------------------------------------------------------------------------|-----------------|--------|------|----|----|-----|--------|
| ARO-p65 | (Q13751) Laminin beta-3 chain precursor (Laminin 5 beta 3) (Laminin B1k chain) (Kalinin B1 chain)                                                                                                                                                  | LAMB3_HUMAN     | 129553 | 100% | 4  | 5  | 10  | 6.66%  |
| ARO-p65 | (Q13753) Laminin gamma-2 chain precursor (Laminin 5 gamma 2 subunit) (Kalinin/nicein/epiligrin 100 kDa subunit) (Laminin B2t chain) (Cell-scattering factor 140 kDa subunit) (CSF 140 kDa subunit) (Large adhesive scatter factor 140 kDa subunit) | LAMC2_HUMAN     | 130958 | 100% | 4  | 4  | 6   | 5.70%  |
| ARO-p65 | (Q14108) Lysosome membrane protein 2 (Lysosome membrane protein II) (LIMP II) (Scavenger receptor class B member 2) (85 kDa lysosomal membrane sialoglycoprotein) (LGP85) (CD36 antigen-like 2)                                                    | SCRIB2_HUMAN    | 54143  | 100% | 4  | 4  | 8   | 17.40% |
| ARO-p65 | (Q14697) Neutral alpha-glucosidase AB precursor (EC 3.2.1.84) (Glucosidase II alpha subunit)                                                                                                                                                       | GANAB_HUMAN     | 106858 | 100% | 4  | 4  | 6   | 8.47%  |
| ARO-p65 | (Q15084) Protein disulfide-isomerase A6 precursor (EC 5.3.4.1) (Protein disulfide isomerase P5) (Thioredoxin domain-containing protein 7)                                                                                                          | PDIA6_HUMAN     | 48104  | 100% | 15 | 24 | 127 | 45.50% |
| ARO-p65 | (Q15181) Inorganic pyrophosphatase (EC 3.6.1.1) (Pyrophosphate phospho-hydrolase) (PPase)                                                                                                                                                          | IPYR_HUMAN      | 32643  | 100% | 2  | 2  | 6   | 10.70% |
| ARO-p65 | (Q15287) RNA-binding protein with serine-rich domain 1 (SR-related protein LDC2)                                                                                                                                                                   | RNPS1_HUMAN     | 34192  | 100% | 3  | 3  | 7   | 17.70% |
| ARO-p65 | (Q15637) Splicing factor 1 (Zinc finger protein 162) (Transcription factor ZFM1) (Zinc finger gene in MEN1 locus) (Mammalian branch point-binding protein mBBP) (BBP)                                                                              | SF01_HUMAN      | 68181  | 100% | 2  | 2  | 2   | 6.27%  |
| ARO-p65 | (Q15758) Neutral amino acid transporter B(0) (ATB(0)) (Sodium-dependent neutral amino acid transporter type 2) (RD114/simian type D retrovirus receptor) (Baboon M7 virus receptor)                                                                | AAAT_HUMAN      | 56582  | 100% | 8  | 8  | 16  | 22.90% |
| ARO-p65 | (Q16563) Synaptophysin-like protein 1 (Pantophysin)                                                                                                                                                                                                | SYPL1_HUMAN     | 28548  | 100% | 2  | 2  | 4   | 14.30% |
| ARO-p65 | (Q16787) Laminin alpha-3 chain precursor (Epiligrin 170 kDa subunit) (E170) (Nicein alpha subunit)                                                                                                                                                 | LAMA3_HUMAN     | 189291 | 100% | 12 | 15 | 24  | 11.20% |
| ARO-p65 | (Q16790) Carbonic anhydrase 9 precursor (EC 4.2.1.1) (Carbonic anhydrase IX) (Carbonate dehydratase IX) (CA-IX) (CAIX) (Membrane antigen MN) (P54/58N) (Renal cell carcinoma-associated antigen G250) (RCC-associated antigen G250) (pMW1)         | CAH9_HUMAN      | 49680  | 100% | 3  | 3  | 6   | 12.60% |
| ARO-p65 | (Q16881) Thioredoxin reductase 1, cytoplasmic precursor (EC 1.8.1.9) (TR) (TR1)                                                                                                                                                                    | TRXR1_HUMAN     | 54689  | 100% | 4  | 5  | 16  | 18.20% |
| ARO-p65 | (Q4VC31) Coiled-coil domain-containing protein 58                                                                                                                                                                                                  | CCD58_HUMAN     | 16602  | 100% | 2  | 2  | 2   | 19.40% |
| ARO-p65 | (Q5ZPR3) CD276 antigen precursor (Costimulatory molecule) (B7 homolog 3) (B7-H3) (4lg-B7-H3)                                                                                                                                                       | CD276_HUMAN     | 57216  | 100% | 5  | 6  | 10  | 21.50% |
| ARO-p65 | (Q6FI13) Histone H2A type 2-A (H2A.2)                                                                                                                                                                                                              | H2A2A_HUMAN,H2A | 13840  | 100% | 5  | 7  | 146 | 58.60% |

## Protein Identified Sequence Coverage in ARO

|         |                                                                                                                                                                                                      |                 |        |      |   |    |    |        |
|---------|------------------------------------------------------------------------------------------------------------------------------------------------------------------------------------------------------|-----------------|--------|------|---|----|----|--------|
| ARO-p65 | (Q6UVK1) Chondroitin sulfate proteoglycan 4 precursor (Chondroitin sulfate proteoglycan NG2) (Melanoma chondroitin sulfate proteoglycan) (Melanoma-associated chondroitin sulfate proteoglycan)      | CSPG4_HUMAN     | 250476 | 100% | 3 | 3  | 5  | 3.40%  |
| ARO-p65 | (Q71U36) Tubulin alpha-3 chain (Alpha-tubulin 3) (Tubulin B-alpha-1)                                                                                                                                 | TBA3_HUMAN,TBA4 | 50118  | 100% | 2 | 2  | 4  | 7.98%  |
| ARO-p65 | (Q71UI9) Histone H2AV (H2A.F/Z)                                                                                                                                                                      | H2AV_HUMAN,H2A  | 13404  | 100% | 2 | 3  | 15 | 31.50% |
| ARO-p65 | (Q7Z6E9) Retinoblastoma-binding protein 6 (p53-associated cellular protein of testis) (Proliferation potential-related protein) (Protein P2P-R) (Retinoblastoma-binding Q protein 1) (Protein RBQ-1) | RBBP6_HUMAN     | 201551 | 100% | 2 | 2  | 4  | 1.73%  |
| ARO-p65 | (Q86UE4) Protein LYRIC (Lysine-rich CEACAM1 coisolated protein) (3D3/lyric) (Metastasis adhesion protein) (Metadherin) (Astrocyte elevated gene-1 protein) (AEG-1)                                   | LYRIC_HUMAN     | 63820  | 100% | 2 | 2  | 4  | 4.64%  |
| ARO-p65 | (Q86V81) THO complex subunit 4 (Tho4) (Ally of AML-1 and LEF-1) (Transcriptional coactivator Aly/REF) (bZIP-enhancing factor BEF)                                                                    | THOC4_HUMAN     | 26740  | 100% | 2 | 2  | 3  | 16.80% |
| ARO-p65 | (Q8IUE6) Histone H2A type 2-B                                                                                                                                                                        | H2A2B_HUMAN     | 13847  | 100% | 3 | 4  | 16 | 35.70% |
| ARO-p65 | (Q8IYB3) Serine/arginine repetitive matrix protein 1 (Ser/Arg-related nuclear matrix protein) (SR-related nuclear matrix protein of 160 kDa) (SRm160)                                                | SRRM1_HUMAN     | 102319 | 100% | 7 | 10 | 60 | 9.85%  |
| ARO-p65 | (Q8NBJ4) Golgi phosphoprotein 2 (Golgi membrane protein GP73)                                                                                                                                        | GP73_HUMAN      | 45315  | 100% | 2 | 2  | 4  | 7.23%  |
| ARO-p65 | (Q8NBJ7) Sulfatase-modifying factor 2 precursor (C-alpha-formylglycine-generating enzyme 2)                                                                                                          | SUMF2_HUMAN     | 33839  | 100% | 5 | 5  | 12 | 21.90% |
| ARO-p65 | (Q8NBS9) Thioredoxin domain-containing protein 5 precursor (Thioredoxin-like protein p46) (Endoplasmic reticulum protein ERp46)                                                                      | TXND5_HUMAN     | 47611  | 100% | 3 | 4  | 5  | 9.26%  |
| ARO-p65 | (Q8TDN6) Brix domain-containing protein 2 (Ribosome biogenesis protein Brix)                                                                                                                         | BXDC2_HUMAN     | 41385  | 100% | 3 | 5  | 11 | 14.70% |
| ARO-p65 | (Q8TEA8) Probable D-tyrosyl-tRNA(Tyr) deacylase (EC 3.1.-.-)                                                                                                                                         | DTD1_HUMAN      | 23406  | 100% | 2 | 2  | 6  | 20.10% |
| ARO-p65 | (Q8WWI5) Choline transporter-like protein 1 (Solute carrier family 44 member 1) (CD92 antigen) (CDw92)                                                                                               | CTL1_HUMAN      | 73287  | 100% | 3 | 3  | 5  | 7.76%  |
| ARO-p65 | (Q92485) Acid sphingomyelinase-like phosphodiesterase 3b precursor (EC 3.1.4.-) (ASM-like phosphodiesterase 3b)                                                                                      | ASM3B_HUMAN     | 50796  | 100% | 8 | 10 | 34 | 35.80% |
| ARO-p65 | (Q92522) Histone H1x                                                                                                                                                                                 | H1X_HUMAN       | 22470  | 100% | 2 | 2  | 5  | 10.30% |
| ARO-p65 | (Q92542) Nicastrin precursor                                                                                                                                                                         | NICA_HUMAN      | 78394  | 100% | 2 | 2  | 2  | 6.49%  |
| ARO-p65 | (Q92692) Poliovirus receptor-related protein 2 precursor (Herpes virus entry mediator B) (HveB) (Nectin-2) (CD112 antigen)                                                                           | PVRL2_HUMAN     | 57724  | 100% | 3 | 3  | 5  | 13.90% |
| ARO-p65 | (Q92820) Gamma-glutamyl hydrolase precursor (EC 3.4.19.9) (Gamma-Glu-X carboxypeptidase) (Conjugase) (GH)                                                                                            | GGH_HUMAN       | 35948  | 100% | 7 | 9  | 50 | 32.10% |
| ARO-p65 | (Q92876) Kallikrein-6 precursor (EC 3.4.21.-) (Protease M) (Neurosin) (Zyme) (SP59)                                                                                                                  | KLK6_HUMAN      | 26838  | 100% | 3 | 3  | 6  | 23.00% |
| ARO-p65 | (Q92896) Golgi apparatus protein 1 precursor (Golgi sialoglycoprotein MG-160) (E-selectin ligand 1) (ESL-1) (Cysteine-rich fibroblast growth factor receptor) (CFR-1)                                | GSLG1_HUMAN     | 134577 | 100% | 4 | 4  | 7  | 6.11%  |

## Protein Identified Sequence Coverage in ARO

|         |                                                                                                                                                                                                                                                 |             |       |      |    |    |     |        |
|---------|-------------------------------------------------------------------------------------------------------------------------------------------------------------------------------------------------------------------------------------------------|-------------|-------|------|----|----|-----|--------|
| ARO-p65 | (Q96HE7) ERO1-like protein alpha precursor (EC 1.8.4.-) (ERO1-Lalpha) (Oxidoreductin-1-Lalpha) (Endoplasmic oxidoreductin-1-like protein) (ERO1-L)                                                                                              | ERO1A_HUMAN | 54377 | 100% | 23 | 32 | 147 | 63.50% |
| ARO-p65 | (Q96HR9) Receptor expression-enhancing protein 6 (Polyposis locus protein 1-like 1)                                                                                                                                                             | REEP6_HUMAN | 20716 | 100% | 2  | 2  | 5   | 12.50% |
| ARO-p65 | (Q99519) Sialidase-1 precursor (EC 3.2.1.18) (Lysosomal sialidase) (N-acetyl-alpha-neuraminidase 1) (Acetylneuraminyl hydrolase) (G9 sialidase)                                                                                                 | NEUR1_HUMAN | 45449 | 100% | 2  | 2  | 7   | 11.10% |
| ARO-p65 | (Q99538) Legumain precursor (EC 3.4.22.34) (Asparaginyl endopeptidase) (Protease, cysteine 1)                                                                                                                                                   | LGMN_HUMAN  | 49393 | 100% | 5  | 6  | 15  | 16.60% |
| ARO-p65 | (Q99757) Thioredoxin, mitochondrial precursor (Mt-Trx) (MTRX) (Thioredoxin-2)                                                                                                                                                                   | THIOM_HUMAN | 18365 | 100% | 2  | 3  | 7   | 9.64%  |
| ARO-p65 | (Q99988) Growth/differentiation factor 15 precursor (GDF-15) (Placental bone morphogenic protein) (Placental TGF-beta) (Macrophage inhibitory cytokine 1) (MIC-1) (Prostate differentiation factor) (NSAID-regulated protein 1) (NRG-1)         | GDF15_HUMAN | 34151 | 100% | 6  | 7  | 12  | 27.30% |
| ARO-p65 | (Q9BS26) Thioredoxin domain-containing protein 4 precursor (Endoplasmic reticulum resident protein ERp44)                                                                                                                                       | TXND4_HUMAN | 46955 | 100% | 3  | 3  | 7   | 21.40% |
| ARO-p65 | (Q9BUL8) Programmed cell death protein 10 (TF-1 cell apoptosis-related protein 15) (Cerebral cavernous malformations 3 protein)                                                                                                                 | PDC10_HUMAN | 24685 | 100% | 4  | 4  | 13  | 27.80% |
| ARO-p65 | (Q9GZM7) Tubulointerstitial nephritis antigen-like precursor (Tubulointerstitial nephritis antigen-related protein) (TIN Ag-related protein) (TIN-Ag-RP) (Glucocorticoid-inducible protein 5) (Oxidized LDL-responsive gene 2 protein) (OLRG-2) | TINAL_HUMAN | 52369 | 100% | 9  | 9  | 20  | 40.00% |
| ARO-p65 | (Q9H3G5) Probable serine carboxypeptidase CPVL precursor (EC 3.4.16.-) (Carboxypeptidase, vitellogenic-like) (Vitellogenic carboxypeptidase-like protein) (VCP-like protein) (HVLV)                                                             | CPVL_HUMAN  | 54148 | 100% | 12 | 15 | 42  | 33.20% |
| ARO-p65 | (Q9H5V8) CUB domain-containing protein 1 precursor (Transmembrane and associated with src kinases) (Membrane glycoprotein gp140) (Subtractive immunization M plus HEP3 associated 135 kDa protein) (SIMA135) (CD318 antigen)                    | CDCP1_HUMAN | 92858 | 100% | 2  | 2  | 4   | 3.23%  |
| ARO-p65 | (Q9H7B2) Brix domain-containing protein 1                                                                                                                                                                                                       | BXDC1_HUMAN | 35568 | 100% | 2  | 2  | 2   | 10.50% |
| ARO-p65 | (Q9HAT2) Sialate O-acetyltransferase precursor (EC 3.1.1.53) (Sialic acid-specific 9-O-acetyltransferase) (H-Lse)                                                                                                                               | SIAE_HUMAN  | 58297 | 100% | 13 | 14 | 40  | 37.90% |
| ARO-p65 | (Q9HDC9) Adipocyte plasma membrane-associated protein (BSCv protein)                                                                                                                                                                            | APMAP_HUMAN | 46464 | 100% | 2  | 2  | 5   | 9.86%  |
| ARO-p65 | (Q9NX58) Cell growth-regulating nucleolar protein                                                                                                                                                                                               | LYAR_HUMAN  | 43597 | 100% | 9  | 10 | 43  | 33.80% |
| ARO-p65 | (Q9NXG2) THUMP domain-containing protein 1                                                                                                                                                                                                      | THUM1_HUMAN | 39298 | 100% | 3  | 3  | 4   | 12.70% |

## Protein Identified Sequence Coverage in ARO

|         |                                                                                                                                                                                                                                               |             |        |      |    |    |     |        |
|---------|-----------------------------------------------------------------------------------------------------------------------------------------------------------------------------------------------------------------------------------------------|-------------|--------|------|----|----|-----|--------|
| ARO-p65 | (Q9NYU2) UDP-glucose:glycoprotein glucosyltransferase 1 precursor (EC 2.4.1.-) (UDP-glucose ceramide glucosyltransferase-like 1) (UDP-Glc:glycoprotein glucosyltransferase) (HUGT1)                                                           | UGGG1_HUMAN | 174965 | 100% | 3  | 3  | 4   | 4.05%  |
| ARO-p65 | (Q9P2B2) Prostaglandin F2 receptor negative regulator precursor (Prostaglandin F2-alpha receptor regulatory protein) (Prostaglandin F2-alpha receptor-associated protein) (CD9 partner 1) (CD9P-1) (CD315 antigen)                            | FPRP_HUMAN  | 98538  | 100% | 5  | 5  | 9   | 10.20% |
| ARO-p65 | (Q9P2E9) Ribosome-binding protein 1 (Ribosome receptor protein) (180 kDa ribosome receptor homolog) (ES/130-related protein)                                                                                                                  | RRBP1_HUMAN | 152453 | 100% | 2  | 2  | 3   | 2.13%  |
| ARO-p65 | (Q9UBR2) Cathepsin Z precursor (EC 3.4.22.-) (Cathepsin X) (Cathepsin P)                                                                                                                                                                      | CATZ_HUMAN  | 33850  | 100% | 6  | 6  | 13  | 29.00% |
| ARO-p65 | (Q9UBS4) DnaJ homolog subfamily B member 11 precursor (ER-associated dnaJ protein 3) (ErJ3) (ER-associated Hsp40 co-chaperone) (hDj9) (PWP1-interacting protein 4)                                                                            | DNJBB_HUMAN | 40497  | 100% | 2  | 3  | 4   | 10.90% |
| ARO-p65 | (Q9UHG3) Prenylcysteine oxidase precursor (EC 1.8.3.5) (PCL1)                                                                                                                                                                                 | PCYOX_HUMAN | 56595  | 100% | 6  | 7  | 11  | 17.40% |
| ARO-p65 | (Q9UHL4) Dipeptidyl-peptidase 2 precursor (EC 3.4.14.2) (Dipeptidyl-peptidase II) (DPP II) (Dipeptidyl aminopeptidase II) (Quiescent cell proline dipeptidase) (Dipeptidyl peptidase 7)                                                       | DPP2_HUMAN  | 54311  | 100% | 15 | 17 | 63  | 47.40% |
| ARO-p65 | (Q9UL46) Proteasome activator complex subunit 2 (Proteasome activator 28-beta subunit) (PA28beta) (PA28b) (Activator of multicatalytic protease subunit 2) (11S regulator complex beta subunit) (REG-beta)                                    | PSME2_HUMAN | 27213  | 100% | 4  | 6  | 21  | 27.70% |
| ARO-p65 | (Q9UMR5) Palmitoyl-protein thioesterase 2 precursor (EC 3.1.2.22) (Palmitoyl-protein hydrolase 2) (PPT-2) (G14)                                                                                                                               | PPT2_HUMAN  | 34291  | 100% | 2  | 2  | 3   | 15.60% |
| ARO-p65 | (Q9UNW1) Multiple inositol polyphosphate phosphatase 1 precursor (EC 3.1.3.62) (Inositol (1,3,4,5)-tetrakisphosphate 3-phosphatase) (Ins(1,3,4,5)P(4) 3-phosphatase)                                                                          | MINP1_HUMAN | 55035  | 100% | 10 | 12 | 36  | 30.20% |
| ARO-p65 | (Q9Y224) Protein C14orf166                                                                                                                                                                                                                    | CN166_HUMAN | 28051  | 100% | 2  | 2  | 4   | 13.50% |
| ARO-p65 | (Q9Y251) Heparanase precursor (EC 3.2.-.-) (Heparanase-1) (Hpa1) (Endo-glycuronidase) [Contains: Heparanase 8 kDa subunit; Heparanase 50 kDa subunit]                                                                                         | HPSE_HUMAN  | 61162  | 100% | 2  | 2  | 2   | 6.45%  |
| ARO-p65 | (Q9Y2B0) MIR-interacting saposin-like protein precursor (Transmembrane protein 4) (Putative secreted protein ZSIG9)                                                                                                                           | MSAP_HUMAN  | 20635  | 100% | 6  | 7  | 22  | 51.10% |
| ARO-p65 | (Q9Y2T3) Guanine deaminase (EC 3.5.4.3) (Guanase) (Guanine aminase) (Guanine aminohydrolase) (GAH) (p51-nedasin)                                                                                                                              | GUAD_HUMAN  | 50986  | 100% | 3  | 3  | 5   | 13.20% |
| ARO-p65 | (Q9Y4L1) 150 kDa oxygen-regulated protein precursor (Orp150) (Hypoxia up-regulated 1)                                                                                                                                                         | OXR1_HUMAN  | 111319 | 100% | 32 | 50 | 230 | 49.20% |
| ARO-p65 | (Q9Y5Y6) Suppressor of tumorigenicity protein 14 (EC 3.4.21.-) (Serine protease 14) (Matriptase) (Membrane-type serine protease 1) (MT-SP1) (Prostamin) (Serine protease TADG-15) (Tumor-associated differentially-expressed gene 15 protein) | ST14_HUMAN  | 94751  | 100% | 12 | 15 | 37  | 26.00% |



## Protein Identified Sequence Coverage in ARO

|             |                                                                                                                                                                                                                                                    |             |        |      |    |    |     |        |
|-------------|----------------------------------------------------------------------------------------------------------------------------------------------------------------------------------------------------------------------------------------------------|-------------|--------|------|----|----|-----|--------|
| ARO-p65     | (Q9Y624) Junctional adhesion molecule A precursor (JAM-A) (Junctional adhesion molecule 1) (JAM-1) (Platelet adhesion molecule 1) (PAM-1) (Platelet F11 receptor) (CD321 antigen)                                                                  | JAM1_HUMAN  | 32565  | 100% | 2  | 2  | 2   | 11.40% |
| ARO-p67 (1) | (O00115) Deoxyribonuclease-2-alpha precursor (EC 3.1.22.1) (Deoxyribonuclease II alpha) (DNase II alpha) (Acid DNase) (Lysosomal DNase II) (R31240_2)                                                                                              | DNS2A_HUMAN | 39563  | 100% | 5  | 5  | 16  | 28.60% |
| ARO-p67 (1) | (O00462) Beta-mannosidase precursor (EC 3.2.1.25) (Lysosomal beta A mannosidase) (Mannanase) (Mannase)                                                                                                                                             | MANBA_HUMAN | 100879 | 100% | 15 | 15 | 28  | 25.40% |
| ARO-p67 (1) | (O00468) Agrin precursor                                                                                                                                                                                                                           | AGRN_HUMAN  | 214863 | 100% | 46 | 53 | 167 | 36.90% |
| ARO-p67 (1) | (O00560) Syntenin-1 (Syndecan-binding protein 1) (Melanoma differentiation-associated protein 9) (MDA 9) (Scaffold protein Pbp1) (Pro-TGF-alpha cytoplasmic domain-interacting protein 18) (TACIP18)                                               | SDCB1_HUMAN | 32427  | 100% | 2  | 2  | 3   | 19.10% |
| ARO-p67 (1) | (O00754) Lysosomal alpha-mannosidase precursor (EC 3.2.1.24) (Mannosidase, alpha B) (Lysosomal acid alpha-mannosidase) (Laman) (Mannosidase alpha class 2B member 1) [Contains: Lysosomal alpha-mannosidase A peptide; Lysosomal alpha-mannosidase | MA2B1_HUMAN | 113656 | 100% | 3  | 4  | 5   | 5.84%  |
| ARO-p67 (1) | (O14672) ADAM 10 precursor (EC 3.4.24.81) (A disintegrin and metalloproteinase domain 10) (Mammalian disintegrin-metalloprotease) (Kuzbanian protein homolog) (CDw156c antigen)                                                                    | ADA10_HUMAN | 84125  | 100% | 10 | 12 | 30  | 19.90% |
| ARO-p67 (1) | (O14773) Tripeptidyl-peptidase 1 precursor (EC 3.4.14.9) (Tripeptidyl-peptidase I) (TPP-I) (Tripeptidyl aminopeptidase) (Lysosomal pepstatin insensitive protease) (LPIC) (Growth-inhibiting gene 1 protein)                                       | TPP1_HUMAN  | 61230  | 100% | 10 | 13 | 182 | 38.00% |
| ARO-p67 (1) | (O15031) Plexin-B2 precursor (MM1)                                                                                                                                                                                                                 | PLXB2_HUMAN | 205081 | 100% | 19 | 21 | 36  | 19.70% |
| ARO-p67 (1) | (O15230) Laminin alpha-5 chain precursor                                                                                                                                                                                                           | LAMA5_HUMAN | 399681 | 100% | 3  | 3  | 5   | 1.43%  |
| ARO-p67 (1) | (O43278) Kunitz-type protease inhibitor 1 precursor (Hepatocyte growth factor activator inhibitor type 1) (HAI-1)                                                                                                                                  | SPIT1_HUMAN | 58379  | 100% | 7  | 7  | 23  | 15.10% |
| ARO-p67 (1) | (O43399) Tumor protein D54 (hD54) (Tumor protein D52-like 2)                                                                                                                                                                                       | TPD54_HUMAN | 22220  | 100% | 12 | 18 | 88  | 58.70% |
| ARO-p67 (1) | (O43490) Prominin-1 precursor (Prominin-like protein 1) (Antigen AC133) (CD133 antigen)                                                                                                                                                            | PROM1_HUMAN | 97188  | 100% | 2  | 2  | 3   | 3.12%  |
| ARO-p67 (1) | (O43570) Carbonic anhydrase 12 precursor (EC 4.2.1.1) (Carbonic anhydrase XII) (Carbonate dehydratase XII) (CA-XII) (Tumor antigen HOM-RCC-3.1.3)                                                                                                  | CAH12_HUMAN | 39434  | 100% | 7  | 8  | 17  | 30.50% |
| ARO-p67 (1) | (O43670) Zinc finger protein 207                                                                                                                                                                                                                   | ZN207_HUMAN | 50733  | 100% | 2  | 3  | 8   | 5.44%  |
| ARO-p67 (1) | (O60664) Mannose-6-phosphate receptor-binding protein 1 (Cargo selection protein TIP47) (47 kDa mannose 6-phosphate receptor-binding protein) (47 kDa MPR-binding protein) (Placental protein 17) (PP17)                                           | M6PBP_HUMAN | 47028  | 100% | 2  | 2  | 2   | 7.60%  |
| ARO-p67 (1) | (O60888) Protein CutA precursor (Brain acetylcholinesterase putative membrane anchor) (Acetylcholinesterase-associated protein)                                                                                                                    | CUTA_HUMAN  | 19098  | 100% | 2  | 2  | 2   | 22.90% |

## Protein Identified Sequence Coverage in ARO

|             |                                                                                                                                                                                                      |                 |        |      |    |    |     |        |
|-------------|------------------------------------------------------------------------------------------------------------------------------------------------------------------------------------------------------|-----------------|--------|------|----|----|-----|--------|
| ARO-p67 (1) | (O75367) Core histone macro-H2A.1 (Histone macroH2A1) (mH2A1) (H2A.y) (H2A/y) (Medulloblastoma antigen MU-MB-50.205)                                                                                 | H2AY_HUMAN      | 39470  | 100% | 9  | 12 | 50  | 44.70% |
| ARO-p67 (1) | (O75503) Ceroid-lipofuscinosis neuronal protein 5 (Protein CLN5)                                                                                                                                     | CLN5_HUMAN      | 46323  | 100% | 3  | 3  | 5   | 13.00% |
| ARO-p67 (1) | (O75976) Carboxypeptidase D precursor (EC 3.4.17.22) (Metallo-carboxypeptidase D) (gp180)                                                                                                            | CBPD_HUMAN      | 152899 | 100% | 3  | 3  | 4   | 4.71%  |
| ARO-p67 (1) | (O76021) Ribosomal L1 domain-containing protein 1 (Cellular senescence-inhibited gene protein) (PBK1 protein) (CATX-11)                                                                              | RL1D1_HUMAN     | 54957  | 100% | 4  | 4  | 7   | 12.00% |
| ARO-p67 (1) | (O94907) Dickkopf-related protein 1 precursor (Dkk-1) (Dickkopf-1) (hDkk-1) (SK)                                                                                                                     | DKK1_HUMAN      | 28653  | 100% | 2  | 2  | 7   | 9.77%  |
| ARO-p67 (1) | (P00390) Glutathione reductase, mitochondrial precursor (EC 1.8.1.7) (GR) (GRase)                                                                                                                    | GSHR_HUMAN      | 56239  | 100% | 4  | 4  | 4   | 17.00% |
| ARO-p67 (1) | (P00558) Phosphoglycerate kinase 1 (EC 2.7.2.3) (Primer recognition protein 2) (PRP 2)                                                                                                               | PGK1_HUMAN      | 44466  | 100% | 7  | 7  | 18  | 26.90% |
| ARO-p67 (1) | (P00918) Carbonic anhydrase 2 (EC 4.2.1.1) (Carbonic anhydrase II) (Carbonate dehydratase II) (CA-II) (Carbonic anhydrase C)                                                                         | CAH2_HUMAN      | 29097  | 100% | 2  | 3  | 6   | 13.50% |
| ARO-p67 (1) | (P01009) Alpha-1-antitrypsin precursor (Alpha-1 protease inhibitor) (Alpha-1-antiproteinase)                                                                                                         | A1AT_HUMAN      | 46720  | 100% | 21 | 30 | 147 | 63.40% |
| ARO-p67 (1) | (P01019) Angiotensinogen precursor [Contains: Angiotensin-1 (Angiotensin I) (Ang I); Angiotensin-2 (Angiotensin II) (Ang II); Angiotensin-3 (Angiotensin III) (Ang III) (Des-Asp[1]-angiotensin II)] | ANGT_HUMAN      | 53137  | 100% | 5  | 5  | 11  | 15.50% |
| ARO-p67 (1) | (P01023) Alpha-2-macroglobulin precursor (Alpha-2-M)                                                                                                                                                 | A2MG_HUMAN      | 163259 | 100% | 3  | 3  | 11  | 2.24%  |
| ARO-p67 (1) | (P01137) Transforming growth factor beta-1 precursor (TGF-beta-1) [Contains: Latency-associated peptide (LAP)]                                                                                       | TGFB1_HUMAN     | 44324  | 100% | 3  | 3  | 6   | 16.90% |
| ARO-p67 (1) | (P01892) HLA class I histocompatibility antigen, A-2 alpha chain precursor (MHC class I antigen A*2)                                                                                                 | 1A02_HUMAN,1A29 | 31658  | 100% | 2  | 2  | 3   | 9.52%  |
| ARO-p67 (1) | (P02545) Lamin-A/C (70 kDa lamin) (NY-REN-32 antigen)                                                                                                                                                | LMNA_HUMAN      | 74123  | 100% | 2  | 2  | 3   | 4.82%  |
| ARO-p67 (1) | (P02649) Apolipoprotein E precursor (Apo-E)                                                                                                                                                          | APOE_HUMAN      | 36136  | 100% | 4  | 4  | 7   | 20.20% |
| ARO-p67 (1) | (P02750) Leucine-rich alpha-2-glycoprotein precursor (LRG)                                                                                                                                           | A2GL_HUMAN      | 38162  | 100% | 2  | 2  | 2   | 11.20% |
| ARO-p67 (1) | (P02765) Alpha-2-HS-glycoprotein precursor (Fetuin-A) (Alpha-2-Z-globulin) (Ba-alpha-2-glycoprotein) [Contains: Alpha-2-HS-glycoprotein chain A; Alpha-2-HS-glycoprotein chain B]                    | FETUA_HUMAN     | 39305  | 100% | 2  | 2  | 3   | 3.54%  |
| ARO-p67 (1) | (P02768) Serum albumin precursor                                                                                                                                                                     | ALBU_HUMAN      | 69349  | 100% | 2  | 3  | 9   | 3.61%  |
| ARO-p67 (1) | (P02774) Vitamin D-binding protein precursor (DBP) (Group-specific component) (Gc-globulin) (VDB)                                                                                                    | VTDB_HUMAN      | 52947  | 100% | 2  | 3  | 11  | 8.23%  |
| ARO-p67 (1) | (P02786) Transferrin receptor protein 1 (TfR1) (TR) (TfR) (TfR) (CD71 antigen) (T9) (p90)                                                                                                            | TFR1_HUMAN      | 84856  | 100% | 3  | 3  | 7   | 5.26%  |
| ARO-p67 (1) | (P04004) Vitronectin precursor (Serum spreading factor) (S-protein) (V75) [Contains: Vitronectin V65 subunit; Vitronectin V10 subunit; Somatomedin B]                                                | VTNC_HUMAN      | 54288  | 100% | 2  | 2  | 8   | 8.79%  |

## Protein Identified Sequence Coverage in ARO

|             |                                                                                                                                                                                                                                                      |             |       |      |    |    |     |        |
|-------------|------------------------------------------------------------------------------------------------------------------------------------------------------------------------------------------------------------------------------------------------------|-------------|-------|------|----|----|-----|--------|
| ARO-p67 (1) | (P04062) Glucosylceramidase precursor (EC 3.2.1.45) (Beta-glucocerebrosidase) (Acid beta-glucosidase) (D-glucosyl-N-acylsphingosine glucosylase) (Alglucerase) (Imiglucerase)                                                                        | GLCM_HUMAN  | 59700 | 100% | 14 | 19 | 81  | 40.70% |
| ARO-p67 (1) | (P04075) Fructose-bisphosphate aldolase A (EC 4.1.2.13) (Muscle-type aldolase) (Lung cancer antigen NY-LU-1)                                                                                                                                         | ALDOA_HUMAN | 39271 | 100% | 2  | 2  | 4   | 9.37%  |
| ARO-p67 (1) | (P04083) Annexin A1 (Annexin I) (Lipocortin I) (Calpactin II) (Chromobindin-9) (p35) (Phospholipase A2 inhibitory protein)                                                                                                                           | ANXA1_HUMAN | 38567 | 100% | 5  | 5  | 17  | 23.80% |
| ARO-p67 (1) | (P04264) Keratin, type II cytoskeletal 1 (Cytokeratin-1) (CK-1) (Keratin-1) (K1) (67 kDa cytokeratin) (Hair alpha protein)                                                                                                                           | K2C1_HUMAN  | 65870 | 100% | 4  | 4  | 5   | 8.71%  |
| ARO-p67 (1) | (P04406) Glyceraldehyde-3-phosphate dehydrogenase (EC 1.2.1.12) (GAPDH)                                                                                                                                                                              | G3P_HUMAN   | 35904 | 100% | 5  | 6  | 14  | 26.30% |
| ARO-p67 (1) | (P05026) Sodium/potassium-transporting ATPase subunit beta-1 (Sodium/potassium-dependent ATPase beta-1 subunit)                                                                                                                                      | AT1B1_HUMAN | 35045 | 100% | 5  | 7  | 14  | 26.40% |
| ARO-p67 (1) | (P05067) Amyloid beta A4 protein precursor (APP) (ABPP) (Alzheimer disease amyloid protein) (Cerebra vascular amyloid peptide) (CVAP) (Protease nexin-II) (PN-II) (APPI) (PreA4) [Contains: Soluble APP-alpha (S-APP-alpha); Soluble APP-beta (S-APP | A4_HUMAN    | 86923 | 100% | 3  | 3  | 5   | 6.88%  |
| ARO-p67 (1) | (P05362) Intercellular adhesion molecule 1 precursor (ICAM-1) (Major group rhinovirus receptor) (CD54 antigen)                                                                                                                                       | ICAM1_HUMAN | 57807 | 100% | 7  | 7  | 22  | 19.70% |
| ARO-p67 (1) | (P05556) Integrin beta-1 precursor (Fibronectin receptor beta subunit) (Integrin VLA-4 beta subunit) (CD29 antigen)                                                                                                                                  | ITB1_HUMAN  | 88447 | 100% | 19 | 22 | 49  | 33.80% |
| ARO-p67 (1) | (P05787) Keratin, type II cytoskeletal 8 (Cytokeratin-8) (CK-8) (Keratin-8) (K8)                                                                                                                                                                     | K2C8_HUMAN  | 53557 | 100% | 2  | 2  | 3   | 4.77%  |
| ARO-p67 (1) | (P06280) Alpha-galactosidase A precursor (EC 3.2.1.22) (Melibiase) (Alpha-D-galactoside galactohydrolase) (Alpha-D-galactosidase A) (Agalsidase alfa)                                                                                                | AGAL_HUMAN  | 48750 | 100% | 6  | 6  | 7   | 25.90% |
| ARO-p67 (1) | (P06733) Alpha-enolase (EC 4.2.1.11) (2-phospho-D-glycerate hydro-lyase) (Non-neural enolase) (NNE) (Enolase 1) (Phosphopyruvate hydratase) (C-myc promoter-binding protein) (MBP-1) (MPB-1) (Plasminogen-binding protein)                           | ENOA_HUMAN  | 47021 | 100% | 10 | 12 | 51  | 38.30% |
| ARO-p67 (1) | (P06744) Glucose-6-phosphate isomerase (EC 5.3.1.9) (GPI) (Phosphoglucose isomerase) (PGI) (Phosphohexose isomerase) (PHI) (Neuroleukin) (NLK) (Sperm antigen 36) (SA-36)                                                                            | G6PI_HUMAN  | 62999 | 100% | 3  | 3  | 5   | 11.70% |
| ARO-p67 (1) | (P06748) Nucleophosmin (NPM) (Nucleolar phosphoprotein B23) (Numatrin) (Nucleolar protein NO38)                                                                                                                                                      | NPM_HUMAN   | 32557 | 100% | 5  | 7  | 24  | 25.90% |
| ARO-p67 (1) | (P06865) Beta-hexosaminidase alpha chain precursor (EC 3.2.1.52) (N-acetyl-beta-glucosaminidase) (Beta-N-acetylhexosaminidase) (Hexosaminidase A)                                                                                                    | HEXA_HUMAN  | 60672 | 100% | 24 | 34 | 224 | 54.40% |
| ARO-p67 (1) | (P07195) L-lactate dehydrogenase B chain (EC 1.1.1.27) (LDH-B) (LDH heart subunit) (LDH-H) (NY-REN-46 antigen)                                                                                                                                       | LDHB_HUMAN  | 36489 | 100% | 4  | 4  | 12  | 16.80% |

## Protein Identified Sequence Coverage in ARO

|             |                                                                                                                                                                                                                                                      |             |        |      |    |    |     |        |
|-------------|------------------------------------------------------------------------------------------------------------------------------------------------------------------------------------------------------------------------------------------------------|-------------|--------|------|----|----|-----|--------|
| ARO-p67 (1) | (P07225) Vitamin K-dependent protein S precursor                                                                                                                                                                                                     | PROS_HUMAN  | 75105  | 100% | 4  | 5  | 11  | 10.50% |
| ARO-p67 (1) | (P07237) Protein disulfide-isomerase precursor (EC 5.3.4.1) (PDI) (Prolyl 4-hydroxylase beta subunit) (Cellular thyroid hormone-binding protein) (p55)                                                                                               | PDIA1_HUMAN | 57100  | 100% | 15 | 20 | 69  | 40.60% |
| ARO-p67 (1) | (P07305) Histone H1.0 (H1(0)) (Histone H1')                                                                                                                                                                                                          | H10_HUMAN   | 20715  | 100% | 2  | 2  | 24  | 11.40% |
| ARO-p67 (1) | (P07339) Cathepsin D precursor (EC 3.4.23.5) [Contains: Cathepsin D light chain; Cathepsin D heavy chain]                                                                                                                                            | CATD_HUMAN  | 44535  | 100% | 16 | 23 | 270 | 49.00% |
| ARO-p67 (1) | (P07355) Annexin A2 (Annexin II) (Lipocortin II) (Calpactin I heavy chain) (Chromobindin-8) (p36) (Protein I) (Placental anticoagulant protein IV) (PAP-IV)                                                                                          | ANXA2_HUMAN | 38457  | 100% | 17 | 23 | 83  | 54.40% |
| ARO-p67 (1) | (P07602) Proactivator polypeptide precursor [Contains: Saposin A (Protein A); Saposin B-Val; Saposin B (Sphingolipid activator protein 1) (SAP-1) (Cerebroside sulfate activator) (CSAct) (Dispersin) (Sulfatide/GM1 activator); Saposin C (Co-beta- | SAP_HUMAN   | 58094  | 100% | 27 | 36 | 411 | 52.70% |
| ARO-p67 (1) | (P07686) Beta-hexosaminidase beta chain precursor (EC 3.2.1.52) (N-acetyl-beta-glucosaminidase) (Beta-N-acetylhexosaminidase) (Hexosaminidase B) (Cervical cancer proto-oncogene 7) (HCC-7) [Contains: Beta-hexosaminidase beta-B chain; Beta-hexos  | HEXB_HUMAN  | 63095  | 100% | 17 | 23 | 154 | 44.20% |
| ARO-p67 (1) | (P07737) Profilin-1 (Profilin I)                                                                                                                                                                                                                     | PROF1_HUMAN | 14905  | 100% | 4  | 4  | 15  | 41.70% |
| ARO-p67 (1) | (P07858) Cathepsin B precursor (EC 3.4.22.1) (Cathepsin B1) (APP secretase) (APPS) [Contains: Cathepsin B light chain; Cathepsin B heavy chain]                                                                                                      | CATB_HUMAN  | 37803  | 100% | 8  | 10 | 53  | 30.10% |
| ARO-p67 (1) | (P07942) Laminin beta-1 chain precursor (Laminin B1 chain)                                                                                                                                                                                           | LAMB1_HUMAN | 198045 | 100% | 19 | 23 | 52  | 19.50% |
| ARO-p67 (1) | (P08107) Heat shock 70 kDa protein 1 (HSP70.1) (HSP70-1/HSP70-2)                                                                                                                                                                                     | HSP71_HUMAN | 70036  | 100% | 3  | 3  | 4   | 11.20% |
| ARO-p67 (1) | (P08174) Complement decay-accelerating factor precursor (CD55 antigen)                                                                                                                                                                               | DAF_HUMAN   | 41382  | 100% | 2  | 2  | 2   | 8.40%  |
| ARO-p67 (1) | (P08195) 4F2 cell-surface antigen heavy chain (4F2hc) (Lymphocyte activation antigen 4F2 large subunit) (4F2 heavy chain antigen) (CD98 antigen)                                                                                                     | 4F2_HUMAN   | 57929  | 100% | 14 | 16 | 51  | 43.90% |
| ARO-p67 (1) | (P08236) Beta-glucuronidase precursor (EC 3.2.1.31) (Beta-G1)                                                                                                                                                                                        | BGLR_HUMAN  | 74699  | 100% | 13 | 15 | 35  | 30.90% |
| ARO-p67 (1) | (P08758) Annexin A5 (Annexin V) (Lipocortin V) (Endonexin II) (Calphobindin I) (CBP-I) (Placental anticoagulant protein I) (PAP-I) (PP4) (Thromboplastin inhibitor) (Vascular anticoagulant-alpha) (VAC-alpha) (Anchoring CII)                       | ANXA5_HUMAN | 35789  | 100% | 13 | 15 | 66  | 54.90% |
| ARO-p67 (1) | (P08865) 40S ribosomal protein SA (p40) (34/67 kDa laminin receptor) (Colon carcinoma laminin-binding protein) (NEM/1CHD4) (Multidrug resistance-associated protein MGr1-Ag)                                                                         | RSSA_HUMAN  | 32705  | 100% | 3  | 3  | 10  | 20.10% |

## Protein Identified Sequence Coverage in ARO

|             |                                                                                                                                                                                                                                                     |             |        |      |    |    |     |        |
|-------------|-----------------------------------------------------------------------------------------------------------------------------------------------------------------------------------------------------------------------------------------------------|-------------|--------|------|----|----|-----|--------|
| ARO-p67 (1) | (P08962) CD63 antigen (Melanoma-associated antigen ME491) (Lysosome-associated membrane glycoprotein 3) (LAMP-3) (Ocular melanoma-associated antigen) (OMA81H) (Granulophysin) (Tetraspanin-30) (Tspan-30)                                          | CD63_HUMAN  | 25487  | 100% | 4  | 5  | 10  | 21.90% |
| ARO-p67 (1) | (P09012) U1 small nuclear ribonucleoprotein A (U1 snRNP protein A) (U1A protein) (U1-A)                                                                                                                                                             | SNRPA_HUMAN | 31131  | 100% | 2  | 2  | 2   | 19.90% |
| ARO-p67 (1) | (P09211) Glutathione S-transferase P (EC 2.5.1.18) (GST class-pi) (GSTP1-1)                                                                                                                                                                         | GSTP1_HUMAN | 23208  | 100% | 3  | 5  | 15  | 26.30% |
| ARO-p67 (1) | (P09429) High mobility group protein B1 (High mobility group protein 1) (HMG-1)                                                                                                                                                                     | HMGB1_HUMAN | 24746  | 100% | 3  | 5  | 23  | 19.20% |
| ARO-p67 (1) | (P09525) Annexin A4 (Annexin IV) (Lipocortin IV) (Endonexin I) (Chromobindin-4) (Protein II) (P32.5) (Placental anticoagulant protein II) (PAP-II) (PP4-X) (35-beta calcimedlin) (Carbohydrate-binding protein P33/P41) (P33/41)                    | ANXA4_HUMAN | 35735  | 100% | 3  | 3  | 5   | 13.80% |
| ARO-p67 (1) | (P09661) U2 small nuclear ribonucleoprotein A' (U2 snRNP-A')                                                                                                                                                                                        | RU2A_HUMAN  | 28399  | 100% | 7  | 9  | 22  | 45.10% |
| ARO-p67 (1) | (P09668) Cathepsin H precursor (EC 3.4.22.16) [Contains: Cathepsin H mini chain; Cathepsin H heavy chain; Cathepsin H light chain]                                                                                                                  | CATH_HUMAN  | 37360  | 100% | 9  | 12 | 94  | 41.20% |
| ARO-p67 (1) | (P10253) Lysosomal alpha-glucosidase precursor (EC 3.2.1.20) (Acid maltase) (Aglucosidase alfa) [Contains: 76 kDa lysosomal alpha-glucosidase; 70 kDa lysosomal alpha-glucosidase]                                                                  | LYAG_HUMAN  | 105321 | 100% | 26 | 37 | 331 | 38.80% |
| ARO-p67 (1) | (P10586) Receptor-type tyrosine-protein phosphatase F precursor (EC 3.1.3.48) (LAR protein) (Leukocyte antigen related)                                                                                                                             | PTPRF_HUMAN | 211826 | 100% | 2  | 2  | 2   | 1.90%  |
| ARO-p67 (1) | (P10619) Lysosomal protective protein precursor (EC 3.4.16.5) (Cathepsin A) (Carboxypeptidase C) (Protective protein for beta-galactosidase) [Contains: Lysosomal protective protein 32 kDa chain; Lysosomal protective protein 20 kDa chain]       | PPGB_HUMAN  | 54450  | 100% | 13 | 17 | 96  | 35.80% |
| ARO-p67 (1) | (P10646) Tissue factor pathway inhibitor precursor (TFPI) (Lipoprotein-associated coagulation inhibitor) (LACI) (Extrinsic pathway inhibitor) (EPI)                                                                                                 | TFPI1_HUMAN | 34998  | 100% | 2  | 2  | 4   | 12.80% |
| ARO-p67 (1) | (P10809) 60 kDa heat shock protein, mitochondrial precursor (Hsp60) (60 kDa chaperonin) (CPN60) (Heat shock protein 60) (HSP-60) (Mitochondrial matrix protein P1) (P60 lymphocyte protein) (HuCHA60)                                               | CH60_HUMAN  | 61038  | 100% | 4  | 5  | 10  | 12.60% |
| ARO-p67 (1) | (P10909) Clusterin precursor (Complement-associated protein SP-40,40) (Complement cytolysis inhibitor) (CLI) (NA1/NA2) (Apolipoprotein J) (Apo-J) (Testosterone-repressed prostate message 2) (TRPM-2) [Contains: Clusterin beta chain (ApoJalpha)] | CLUS_HUMAN  | 52477  | 100% | 2  | 2  | 3   | 9.58%  |
| ARO-p67 (1) | (P11021) 78 kDa glucose-regulated protein precursor (GRP 78) (Immunoglobulin heavy chain-binding protein) (BiP) (Endoplasmic reticulum luminal Ca(2+) binding protein grp78)                                                                        | GRP78_HUMAN | 72317  | 100% | 24 | 34 | 228 | 45.70% |
| ARO-p67 (1) | (P11117) Lysosomal acid phosphatase precursor (EC 3.1.3.2) (LAP)                                                                                                                                                                                    | PPAL_HUMAN  | 48299  | 100% | 7  | 9  | 22  | 23.20% |

## Protein Identified Sequence Coverage in ARO

|             |                                                                                                                                                                                                                                                      |             |        |      |    |    |     |        |
|-------------|------------------------------------------------------------------------------------------------------------------------------------------------------------------------------------------------------------------------------------------------------|-------------|--------|------|----|----|-----|--------|
| ARO-p67 (1) | (P11142) Heat shock cognate 71 kDa protein (Heat shock 70 kDa protein 8)                                                                                                                                                                             | HSP7C_HUMAN | 70882  | 100% | 6  | 6  | 8   | 24.10% |
| ARO-p67 (1) | (P11166) Solute carrier family 2, facilitated glucose transporter member 1 (Glucose transporter type 1, erythrocyte/brain) (HepG2 glucose transporter)                                                                                               | GTR1_HUMAN  | 54101  | 100% | 7  | 8  | 16  | 15.00% |
| ARO-p67 (1) | (P11279) Lysosome-associated membrane glycoprotein 1 precursor (LAMP-1) (CD107a antigen)                                                                                                                                                             | LAMP1_HUMAN | 44756  | 100% | 8  | 10 | 31  | 31.20% |
| ARO-p67 (1) | (P11717) Cation-independent mannose-6-phosphate receptor precursor (CI Man-6-P receptor) (CI-MPR) (M6PR) (Insulin-like growth factor 2 receptor) (Insulin-like growth factor II receptor) (IGF-II receptor) (M6P/IGF2 receptor) (M6P/IGF2R) (300 kD) | MPRI_HUMAN  | 274256 | 100% | 21 | 24 | 37  | 16.90% |
| ARO-p67 (1) | (P12830) Epithelial-cadherin precursor (E-cadherin) (Uvomorulin) (Cadherin-1) (CAM 120/80) (CD324 antigen) [Contains: E-Cad/CTF1; E-Cad/CTF2; E-Cad/CTF3]                                                                                            | CADH1_HUMAN | 97440  | 100% | 7  | 10 | 56  | 11.10% |
| ARO-p67 (1) | (P13284) Gamma-interferon-inducible lysosomal thiol reductase precursor (Gamma-interferon-inducible protein IP-30)                                                                                                                                   | GILT_HUMAN  | 29131  | 100% | 4  | 5  | 27  | 39.80% |
| ARO-p67 (1) | (P13473) Lysosome-associated membrane glycoprotein 2 precursor (LAMP-2) (CD107b antigen)                                                                                                                                                             | LAMP2_HUMAN | 44943  | 100% | 7  | 9  | 43  | 26.80% |
| ARO-p67 (1) | (P13645) Keratin, type I cytoskeletal 10 (Cytokeratin-10) (CK-10) (Keratin-10) (K10)                                                                                                                                                                 | K1C10_HUMAN | 59502  | 100% | 2  | 2  | 3   | 8.43%  |
| ARO-p67 (1) | (P13667) Protein disulfide-isomerase A4 precursor (EC 5.3.4.1) (Protein ERp-72) (ERp72)                                                                                                                                                              | PDIA4_HUMAN | 72916  | 100% | 30 | 38 | 225 | 46.50% |
| ARO-p67 (1) | (P13987) CD59 glycoprotein precursor (Membrane attack complex inhibition factor) (MACIF) (MAC-inhibitory protein) (MAC-IP) (Protectin) (MEM43 antigen) (Membrane inhibitor of reactive lysis) (MIRL) (20 kDa homologous restriction factor) (HRF-20) | CD59_HUMAN  | 14159  | 100% | 5  | 7  | 165 | 37.50% |
| ARO-p67 (1) | (P14314) Glucosidase 2 beta subunit precursor (Glucosidase II beta subunit) (Protein kinase C substrate, 60.1 kDa protein, heavy chain) (PKCSH) (80K-H protein)                                                                                      | GLU2B_HUMAN | 59279  | 100% | 18 | 23 | 130 | 47.20% |
| ARO-p67 (1) | (P14618) Pyruvate kinase isozymes M1/M2 (EC 2.7.1.40) (Pyruvate kinase muscle isozyme) (Cytosolic thyroid hormone-binding protein) (CTHBP) (THBP1)                                                                                                   | KPYM_HUMAN  | 57788  | 100% | 4  | 4  | 5   | 13.80% |
| ARO-p67 (1) | (P14625) Endoplasmic precursor (Heat shock protein 90 kDa beta member 1) (94 kDa glucose-regulated protein) (GRP94) (gp96 homolog) (Tumor rejection antigen 1)                                                                                       | ENPL_HUMAN  | 92454  | 100% | 9  | 10 | 22  | 16.60% |
| ARO-p67 (1) | (P14927) Ubiquinol-cytochrome c reductase complex 14 kDa protein (EC 1.10.2.2) (Complex III subunit VI) (QP-C)                                                                                                                                       | UCR6_HUMAN  | 13382  | 100% | 2  | 2  | 2   | 20.90% |
| ARO-p67 (1) | (P15151) Poliovirus receptor precursor (Nectin-like protein 5) (Necl-5) (CD155 antigen)                                                                                                                                                              | PVR_HUMAN   | 45284  | 100% | 4  | 4  | 7   | 14.60% |
| ARO-p67 (1) | (P15289) Arylsulfatase A precursor (EC 3.1.6.8) (ASA) (Cerebrosidase-sulfatase) [Contains: Arylsulfatase A component B; Arylsulfatase A component C]                                                                                                 | ARSA_HUMAN  | 53571  | 100% | 4  | 5  | 17  | 14.00% |

## Protein Identified Sequence Coverage in ARO

|             |                                                                                                                                                                                                                                                     |             |        |      |    |    |     |        |
|-------------|-----------------------------------------------------------------------------------------------------------------------------------------------------------------------------------------------------------------------------------------------------|-------------|--------|------|----|----|-----|--------|
| ARO-p67 (1) | (P15529) Membrane cofactor protein precursor (Trophoblast leukocyte common antigen) (TLX) (CD46 antigen)                                                                                                                                            | MCP_HUMAN   | 43730  | 100% | 5  | 8  | 23  | 19.90% |
| ARO-p67 (1) | (P15531) Nucleoside diphosphate kinase A (EC 2.7.4.6) (NDK A) (NDP kinase A) (Tumor metastatic process-associated protein) (Metastasis inhibition factor nm23) (nm23-H1) (Granzyme A-activated DNase) (GAAD)                                        | NDKA_HUMAN  | 17131  | 100% | 2  | 2  | 2   | 36.20% |
| ARO-p67 (1) | (P15586) N-acetylglucosamine-6-sulfatase precursor (EC 3.1.6.14) (G6S) (Glucosamine-6-sulfatase)                                                                                                                                                    | GL6S_HUMAN  | 62066  | 100% | 15 | 18 | 60  | 35.70% |
| ARO-p67 (1) | (P15880) 40S ribosomal protein S2 (S4) (LLRep3 protein)                                                                                                                                                                                             | RS2_HUMAN   | 31307  | 100% | 2  | 2  | 7   | 8.19%  |
| ARO-p67 (1) | (P16070) CD44 antigen precursor (Phagocytic glycoprotein I) (PGP-1) (HUTCH-I) (Extracellular matrix receptor-III) (ECMR-III) (GP90 lymphocyte homing/adhesion receptor) (Hermes antigen) (Hyaluronate receptor) (Heparan sulfate proteoglycan Epi)  | CD44_HUMAN  | 81535  | 100% | 10 | 13 | 104 | 16.60% |
| ARO-p67 (1) | (P16278) Beta-galactosidase precursor (EC 3.2.1.23) (Lactase) (Acid beta-galactosidase)                                                                                                                                                             | BGAL_HUMAN  | 76076  | 100% | 15 | 19 | 98  | 29.70% |
| ARO-p67 (1) | (P16401) Histone H1.5 (Histone H1a)                                                                                                                                                                                                                 | H15_HUMAN   | 22433  | 100% | 3  | 4  | 26  | 10.70% |
| ARO-p67 (1) | (P16402) Histone H1.3 (Histone H1c)                                                                                                                                                                                                                 | H13_HUMAN   | 22202  | 100% | 5  | 5  | 42  | 15.50% |
| ARO-p67 (1) | (P16422) Tumor-associated calcium signal transducer 1 precursor (Major gastrointestinal tumor-associated protein GA733-2) (Epithelial cell surface antigen) (Epithelial glycoprotein) (EGP) (Adenocarcinoma-associated antigen) (KSA) (KS 1/4 anti) | TACD1_HUMAN | 34902  | 100% | 10 | 14 | 97  | 47.10% |
| ARO-p67 (1) | (P17050) Alpha-N-acetylgalactosaminidase precursor (EC 3.2.1.49) (Alpha-galactosidase B)                                                                                                                                                            | NAGAB_HUMAN | 46548  | 100% | 5  | 5  | 15  | 22.60% |
| ARO-p67 (1) | (P17301) Integrin alpha-2 precursor (Platelet membrane glycoprotein Ia) (GPIa) (Collagen receptor (VLA-2 alpha chain) (CD49b antigen)                                                                                                               | ITA2_HUMAN  | 129280 | 100% | 14 | 15 | 37  | 20.90% |
| ARO-p67 (1) | (P17900) Ganglioside GM2 activator precursor (GM2-AP) (Cerebroside sulfate activator protein) (Shingolipid activator protein 3) (SAP-3) [Contains: Ganglioside GM2 activator isoform short]                                                         | SAP3_HUMAN  | 20805  | 100% | 2  | 2  | 7   | 16.10% |
| ARO-p67 (1) | (P18084) Integrin beta-5 precursor                                                                                                                                                                                                                  | ITB5_HUMAN  | 88037  | 100% | 5  | 5  | 15  | 13.60% |
| ARO-p67 (1) | (P18583) SON protein (SON3) (Negative regulatory element-binding protein) (NRE-binding protein) (DBP-5) (Bax antagonist selected in saccharomyces 1) (BASS1)                                                                                        | SON_HUMAN   | 263828 | 100% | 5  | 6  | 8   | 3.96%  |
| ARO-p67 (1) | (P18621) 60S ribosomal protein L17 (L23)                                                                                                                                                                                                            | RL17_HUMAN  | 21248  | 100% | 3  | 4  | 14  | 21.90% |
| ARO-p67 (1) | (P18669) Phosphoglycerate mutase 1 (EC 5.4.2.1) (EC 5.4.2.4) (EC 3.1.3.13) (Phosphoglycerate mutase isozyme B) (PGAM-B) (BPG-dependent PGAM 1)                                                                                                      | PGAM1_HUMAN | 28656  | 100% | 2  | 2  | 3   | 16.20% |
| ARO-p67 (1) | (P19075) Tetraspanin-8 (Tspan-8) (Transmembrane 4 superfamily member 3) (Tumor-associated antigen CO-029)                                                                                                                                           | TSN8_HUMAN  | 26027  | 100% | 4  | 4  | 40  | 23.20% |
| ARO-p67 (1) | (P19338) Nucleolin (Protein C23)                                                                                                                                                                                                                    | NUCL_HUMAN  | 76467  | 100% | 4  | 6  | 13  | 10.00% |

## Protein Identified Sequence Coverage in ARO

|             |                                                                                                                                                                                                                                                     |             |        |      |    |    |    |        |
|-------------|-----------------------------------------------------------------------------------------------------------------------------------------------------------------------------------------------------------------------------------------------------|-------------|--------|------|----|----|----|--------|
| ARO-p67 (1) | (P20618) Proteasome subunit beta type 1 (EC 3.4.25.1) (Proteasome component C5) (Macropain subunit C5) (Multicatalytic endopeptidase complex subunit C5) (Proteasome gamma chain)                                                                   | PSB1_HUMAN  | 26473  | 100% | 3  | 3  | 3  | 21.60% |
| ARO-p67 (1) | (P20933) N(4)-(beta-N-acetylglucosaminyl)-L-asparaginase precursor (EC 3.5.1.26) (Glycosylasparaginase) (Aspartylglucosaminidase) (N4-(N-acetyl-beta-glucosaminyl)-L-asparagine amidase) (AGA) [Contains: Glycosylasparaginase alpha chain; Glycosy | ASPG_HUMAN  | 37176  | 100% | 4  | 6  | 18 | 18.20% |
| ARO-p67 (1) | (P21589) 5'-nucleotidase precursor (EC 3.1.3.5) (Ecto-5'-nucleotidase) (5'-NT) (CD73 antigen)                                                                                                                                                       | 5NTD_HUMAN  | 63351  | 100% | 10 | 11 | 18 | 30.00% |
| ARO-p67 (1) | (P21926) CD9 antigen (p24) (Leukocyte antigen MIC3) (Motility-related protein) (MRP-1) (Tetraspanin-29) (Tspan-29)                                                                                                                                  | CD9_HUMAN   | 25268  | 100% | 2  | 3  | 20 | 15.40% |
| ARO-p67 (1) | (P22234) Multifunctional protein ADE2 [Includes: Phosphoribosylaminoimidazole-succinocarboxamide synthase (EC 6.3.2.6) (SAICAR synthetase); Phosphoribosylaminoimidazole carboxylase (EC 4.1.1.21) (AIR carboxylase) (AIRC)]                        | PUR6_HUMAN  | 46931  | 100% | 2  | 2  | 2  | 8.02%  |
| ARO-p67 (1) | (P22304) Iduronate 2-sulfatase precursor (EC 3.1.6.13) (Alpha-L-iduronate sulfate sulfatase) (Idursulfase) [Contains: Iduronate 2-sulfatase 42 kDa chain; Iduronate 2-sulfatase 14 kDa chain]                                                       | IDS_HUMAN   | 61857  | 100% | 2  | 2  | 3  | 9.09%  |
| ARO-p67 (1) | (P22307) Nonspecific lipid-transfer protein (EC 2.3.1.176) (Propanoyl-CoA C-acyltransferase) (NSLTP) (Sterol carrier protein 2) (SCP-2) (Sterol carrier protein X) (SCP-X) (SCP-chi) (SCPX)                                                         | NLTP_HUMAN  | 58977  | 100% | 2  | 2  | 5  | 4.20%  |
| ARO-p67 (1) | (P22392) Nucleoside diphosphate kinase B (EC 2.7.4.6) (NDK B) (NDP kinase B) (nm23-H2) (C-myc purine-binding transcription factor PUF)                                                                                                              | NDKB_HUMAN  | 17280  | 100% | 4  | 6  | 19 | 39.50% |
| ARO-p67 (1) | (P22626) Heterogeneous nuclear ribonucleoproteins A2/B1 (hnRNP A2 / hnRNP B1)                                                                                                                                                                       | ROA2_HUMAN  | 37412  | 100% | 3  | 3  | 3  | 11.60% |
| ARO-p67 (1) | (P23229) Integrin alpha-6 precursor (VLA-6) (CD49f antigen) [Contains: Integrin alpha-6 heavy chain; Integrin alpha-6 light chain]                                                                                                                  | ITA6_HUMAN  | 126604 | 100% | 5  | 5  | 6  | 8.50%  |
| ARO-p67 (1) | (P23284) Peptidyl-prolyl cis-trans isomerase B precursor (EC 5.2.1.8) (PPIase) (Rotamase) (Cyclophilin B) (S-cyclophilin) (SCYLP) (CYP-S1)                                                                                                          | PPIB_HUMAN  | 22725  | 100% | 5  | 5  | 8  | 30.30% |
| ARO-p67 (1) | (P23396) 40S ribosomal protein S3                                                                                                                                                                                                                   | RS3_HUMAN   | 26671  | 100% | 2  | 2  | 3  | 9.47%  |
| ARO-p67 (1) | (P23528) Cofilin-1 (Cofilin, non-muscle isoform) (18 kDa phosphoprotein) (p18)                                                                                                                                                                      | COF1_HUMAN  | 18354  | 100% | 5  | 8  | 19 | 44.20% |
| ARO-p67 (1) | (P25311) Zinc-alpha-2-glycoprotein precursor (Zn-alpha-2-glycoprotein) (Zn-alpha-2-GP)                                                                                                                                                              | ZA2G_HUMAN  | 33854  | 100% | 2  | 2  | 2  | 10.50% |
| ARO-p67 (1) | (P25815) Protein S100-P (S100 calcium-binding protein P)                                                                                                                                                                                            | S100P_HUMAN | 10382  | 100% | 2  | 2  | 2  | 31.60% |
| ARO-p67 (1) | (P26373) 60S ribosomal protein L13 (Breast basic conserved protein 1)                                                                                                                                                                               | RL13_HUMAN  | 24113  | 100% | 3  | 3  | 7  | 15.20% |
| ARO-p67 (1) | (P26583) High mobility group protein B2 (High mobility group protein 2) (HMG-2)                                                                                                                                                                     | HMGB2_HUMAN | 23885  | 100% | 3  | 3  | 4  | 19.70% |



## Protein Identified Sequence Coverage in ARO

|             |                                                                                                                                                                                                                                                      |             |        |      |    |    |     |        |
|-------------|------------------------------------------------------------------------------------------------------------------------------------------------------------------------------------------------------------------------------------------------------|-------------|--------|------|----|----|-----|--------|
| ARO-p67 (1) | (P26885) FK506-binding protein 2 precursor (EC 5.2.1.8) (Peptidyl-prolyl cis-trans isomerase) (PPlase) (Rotamase) (13 kDa FKBP) (FKBP-13)                                                                                                            | FKBP2_HUMAN | 15632  | 100% | 3  | 4  | 7   | 38.00% |
| ARO-p67 (1) | (P27348) 14-3-3 protein theta (14-3-3 protein tau) (14-3-3 protein T-cell) (HS1 protein)                                                                                                                                                             | 1433T_HUMAN | 27747  | 100% | 2  | 3  | 4   | 11.80% |
| ARO-p67 (1) | (P27487) Dipeptidyl peptidase 4 (EC 3.4.14.5) (Dipeptidyl peptidase IV) (DPP IV) (T-cell activation antigen CD26) (TP103) (Adenosine deaminase complexing protein 2) (ADABP) [Contains: Dipeptidyl peptidase 4 membrane form (Dipeptidyl peptidase   | DPP4_HUMAN  | 88263  | 100% | 24 | 30 | 106 | 34.60% |
| ARO-p67 (1) | (P27695) DNA-(apurinic or apyrimidinic site) lyase (EC 4.2.99.18) (AP endonuclease 1) (APEX nuclease) (APEN) (REF-1 protein)                                                                                                                         | APEX1_HUMAN | 35407  | 100% | 2  | 2  | 6   | 16.70% |
| ARO-p67 (1) | (P27797) Calreticulin precursor (CRP55) (Calregulin) (HACBP) (ERp60) (grp60)                                                                                                                                                                         | CRTC_HUMAN  | 48125  | 100% | 7  | 9  | 41  | 35.50% |
| ARO-p67 (1) | (P28799) Granulins precursor (Proepithelin) (PEPI) [Contains: Acrogranin; Paragranulin; Granulin-1 (Granulin G); Granulin-2 (Granulin F); Granulin-3 (Granulin B); Granulin-4 (Granulin A); Granulin-5 (Granulin C); Granulin-6 (Granulin D); Granul | GRN_HUMAN   | 63522  | 100% | 7  | 7  | 18  | 18.40% |
| ARO-p67 (1) | (P29323) Ephrin type-B receptor 2 precursor (EC 2.7.10.1) (Tyrosine-protein kinase receptor EPH-3) (DRT) (Receptor protein-tyrosine kinase HEK5) (ERK) (NY-REN-47 antigen)                                                                           | EPHB2_HUMAN | 117476 | 100% | 3  | 3  | 6   | 4.55%  |
| ARO-p67 (1) | (P29401) Transketolase (EC 2.2.1.1) (TK)                                                                                                                                                                                                             | TKT_HUMAN   | 67861  | 100% | 2  | 2  | 2   | 6.90%  |
| ARO-p67 (1) | (P30040) Endoplasmic reticulum protein ERp29 precursor (ERp31) (ERp28)                                                                                                                                                                               | ERP29_HUMAN | 28977  | 100% | 9  | 10 | 56  | 50.20% |
| ARO-p67 (1) | (P30041) Peroxiredoxin-6 (EC 1.11.1.15) (Antioxidant protein 2) (1-Cys peroxiredoxin) (1-Cys PRX) (Acidic calcium-independent phospholipase A2) (EC 3.1.1.-) (aiPLA2) (Non-selenium glutathione peroxidase) (EC 1.11.1.7) (NSGPx) (24 kDa protein)   | PRDX6_HUMAN | 24887  | 100% | 5  | 8  | 21  | 37.70% |
| ARO-p67 (1) | (P30048) Thioredoxin-dependent peroxide reductase, mitochondrial precursor (EC 1.11.1.15) (Peroxiredoxin 3) (Antioxidant protein 1) (AOP-1) (MER5 protein homolog) (HBC189) (PRX III)                                                                | PRDX3_HUMAN | 27675  | 100% | 2  | 2  | 4   | 9.77%  |
| ARO-p67 (1) | (P30050) 60S ribosomal protein L12                                                                                                                                                                                                                   | RL12_HUMAN  | 17801  | 100% | 3  | 4  | 12  | 28.50% |
| ARO-p67 (1) | (P30101) Protein disulfide-isomerase A3 precursor (EC 5.3.4.1) (Disulfide isomerase ER-60) (ERp60) (58 kDa microsomal protein) (p58) (ERp57) (58 kDa glucose-regulated protein)                                                                      | PDIA3_HUMAN | 56767  | 100% | 23 | 27 | 106 | 50.10% |
| ARO-p67 (1) | (P30533) Alpha-2-macroglobulin receptor-associated protein precursor (Alpha-2-MRAP) (Low density lipoprotein receptor-related protein-associated protein 1) (RAP)                                                                                    | AMRP_HUMAN  | 41450  | 100% | 3  | 4  | 9   | 13.40% |
| ARO-p67 (1) | (P30740) Leukocyte elastase inhibitor (LEI) (Serpine B1) (Monocyte/neutrophil elastase inhibitor) (M/NEI) (EI)                                                                                                                                       | ILEU_HUMAN  | 42726  | 100% | 4  | 4  | 7   | 20.60% |

## Protein Identified Sequence Coverage in ARO

|             |                                                                                                                                                                                                                                                    |             |        |      |    |    |    |        |
|-------------|----------------------------------------------------------------------------------------------------------------------------------------------------------------------------------------------------------------------------------------------------|-------------|--------|------|----|----|----|--------|
| ARO-p67 (1) | (P32119) Peroxiredoxin-2 (EC 1.11.1.15) (Thioredoxin peroxidase 1) (Thioredoxin-dependent peroxide reductase 1) (Thiol-specific antioxidant protein) (TSA) (PRP) (Natural killer cell-enhancing factor B) (NKEF-B)                                 | PRDX2_HUMAN | 21743  | 100% | 2  | 2  | 4  | 14.70% |
| ARO-p67 (1) | (P34059) N-acetylgalactosamine-6-sulfatase precursor (EC 3.1.6.4) (N-acetylgalactosamine-6-sulfate sulfatase) (Galactose-6-sulfate sulfatase) (GalNAc6S sulfatase) (Chondroitinsulfatase) (Chondroitinase)                                         | GA6S_HUMAN  | 58009  | 100% | 10 | 15 | 40 | 27.60% |
| ARO-p67 (1) | (P35475) Alpha-L-iduronidase precursor (EC 3.2.1.76)                                                                                                                                                                                               | IDUA_HUMAN  | 72653  | 100% | 4  | 5  | 6  | 9.95%  |
| ARO-p67 (1) | (P35527) Keratin, type I cytoskeletal 9 (Cytokeratin-9) (CK-9) (Keratin-9) (K9)                                                                                                                                                                    | K1C9_HUMAN  | 62113  | 100% | 3  | 3  | 4  | 10.60% |
| ARO-p67 (1) | (P35579) Myosin-9 (Myosin heavy chain, nonmuscle IIa) (Nonmuscle myosin heavy chain IIa) (NMMHC II-a) (NMMHC-IIA) (Cellular myosin heavy chain, type A) (Nonmuscle myosin heavy chain-A) (NMMHC-A)                                                 | MYH9_HUMAN  | 226388 | 100% | 2  | 2  | 2  | 2.19%  |
| ARO-p67 (1) | (P35613) Basigin precursor (Leukocyte activation antigen M6) (Collagenase stimulatory factor) (Extracellular matrix metalloproteinase inducer) (EMMPRIN) (5F7) (Tumor cell-derived collagenase stimulatory factor) (TCSF) (OK blood group antigen) | BASI_HUMAN  | 42182  | 100% | 10 | 16 | 77 | 42.60% |
| ARO-p67 (1) | (P36578) 60S ribosomal protein L4 (L1)                                                                                                                                                                                                             | RL4_HUMAN   | 47550  | 100% | 7  | 7  | 20 | 19.50% |
| ARO-p67 (1) | (P37108) Signal recognition particle 14 kDa protein (SRP14) (18 kDa Alu RNA-binding protein)                                                                                                                                                       | SRP14_HUMAN | 14527  | 100% | 2  | 3  | 5  | 31.60% |
| ARO-p67 (1) | (P37198) Nuclear pore glycoprotein p62 (62 kDa nucleoporin)                                                                                                                                                                                        | NUP62_HUMAN | 53252  | 100% | 3  | 3  | 7  | 9.39%  |
| ARO-p67 (1) | (P37802) Transgelin-2 (SM22-alpha homolog)                                                                                                                                                                                                         | TAGL2_HUMAN | 22243  | 100% | 4  | 4  | 7  | 27.80% |
| ARO-p67 (1) | (P37837) Transaldolase (EC 2.2.1.2)                                                                                                                                                                                                                | TALDO_HUMAN | 37524  | 100% | 8  | 8  | 25 | 25.80% |
| ARO-p67 (1) | (P39656) Dolichyl-diphosphooligosaccharide--protein glycosyltransferase 48 kDa subunit precursor (EC 2.4.1.119) (Oligosaccharyl transferase 48 kDa subunit) (DDOST 48 kDa subunit)                                                                 | OST48_HUMAN | 48793  | 100% | 2  | 2  | 3  | 9.11%  |
| ARO-p67 (1) | (P42167) Lamina-associated polypeptide 2, isoforms beta/gamma (Thymopoietin, isoforms beta/gamma) (TP beta/gamma) (Thymopoietin-related peptide isoforms beta/gamma) (TPRP isoforms beta/gamma) [Contains: Thymopoietin (TP) (Splenin); Thymopenti | LAP2B_HUMAN | 50522  | 100% | 4  | 5  | 11 | 18.50% |
| ARO-p67 (1) | (P43251) Biotinidase precursor (EC 3.5.1.12)                                                                                                                                                                                                       | BTD_HUMAN   | 58896  | 100% | 7  | 8  | 11 | 22.20% |
| ARO-p67 (1) | (P43490) Nicotinamide phosphoribosyltransferase (EC 2.4.2.12) (NAmPRTase) (Nampt) (Pre-B cell-enhancing factor) (Pre-B-cell colony-enhancing factor 1) (Visfatin)                                                                                  | NAMPT_HUMAN | 55505  | 100% | 5  | 5  | 11 | 17.70% |
| ARO-p67 (1) | (P46778) 60S ribosomal protein L21                                                                                                                                                                                                                 | RL21_HUMAN  | 18416  | 100% | 3  | 4  | 21 | 27.70% |
| ARO-p67 (1) | (P46782) 40S ribosomal protein S5                                                                                                                                                                                                                  | RS5_HUMAN   | 22728  | 100% | 2  | 2  | 9  | 17.20% |
| ARO-p67 (1) | (P46976) Glycogenin-1 (EC 2.4.1.186)                                                                                                                                                                                                               | GLYG_HUMAN  | 39235  | 100% | 4  | 4  | 10 | 14.90% |

## Protein Identified Sequence Coverage in ARO

|             |                                                                                                                                                                                                                                                     |             |        |      |    |    |    |        |
|-------------|-----------------------------------------------------------------------------------------------------------------------------------------------------------------------------------------------------------------------------------------------------|-------------|--------|------|----|----|----|--------|
| ARO-p67 (1) | (P49006) MARCKS-related protein (MARCKS-like protein 1) (Macrophage myristoylated alanine-rich C kinase substrate) (Mac-MARCKS) (MacMARCKS)                                                                                                         | MRP_HUMAN   | 19379  | 100% | 3  | 4  | 4  | 42.80% |
| ARO-p67 (1) | (P49902) Cytosolic purine 5'-nucleotidase (EC 3.1.3.5) (5'-nucleotidase cytosolic II)                                                                                                                                                               | 5NTC_HUMAN  | 64955  | 100% | 4  | 4  | 4  | 16.60% |
| ARO-p67 (1) | (P50454) Collagen-binding protein 2 precursor (Colligin 2) (Rheumatoid arthritis-related antigen RA-A47) (Serpín H2)                                                                                                                                | SPH2_HUMAN  | 46424  | 100% | 6  | 8  | 28 | 18.40% |
| ARO-p67 (1) | (P50895) Lutheran blood group glycoprotein precursor (B-CAM cell surface glycoprotein) (Auberger B antigen) (F8/G253 antigen)                                                                                                                       | LU_HUMAN    | 67386  | 100% | 20 | 23 | 85 | 49.20% |
| ARO-p67 (1) | (P50897) Palmitoyl-protein thioesterase 1 precursor (EC 3.1.2.22) (Palmitoyl-protein hydrolase 1)                                                                                                                                                   | PPT1_HUMAN  | 34176  | 100% | 8  | 13 | 43 | 40.20% |
| ARO-p67 (1) | (P51572) B-cell receptor-associated protein 31 (BCR-associated protein Bap31) (p28 Bap31) (CDM protein) (6C6-AG tumor-associated antigen) (DXS1357E)                                                                                                | BAP31_HUMAN | 27843  | 100% | 3  | 3  | 8  | 9.80%  |
| ARO-p67 (1) | (P51610) Host cell factor (HCF) (HCF-1) (C1 factor) (VP16 accessory protein) (VCAF) (CFF) [Contains: HCF N-terminal chain 1; HCF N-terminal chain 2; HCF N-terminal chain 3; HCF N-terminal chain 4; HCF N-terminal chain 5; HCF N-terminal chain   | HCFC1_HUMAN | 208816 | 100% | 6  | 7  | 14 | 5.85%  |
| ARO-p67 (1) | (P51688) N-sulphoglucosamine sulphohydrolase precursor (EC 3.10.1.1) (Sulfoglucosamine sulfamidase) (Sulphamidase)                                                                                                                                  | SPHM_HUMAN  | 56678  | 100% | 5  | 5  | 15 | 13.90% |
| ARO-p67 (1) | (P52799) Ephrin-B2 precursor (EPH-related receptor tyrosine kinase ligand 5) (LERK-5) (HTK ligand) (HTK L)                                                                                                                                          | EFNB2_HUMAN | 36906  | 100% | 3  | 3  | 9  | 17.70% |
| ARO-p67 (1) | (P53365) Arfaptin-2 (ADP-ribosylation factor-interacting protein 2) (Partner of RAC1) (POR1 protein)                                                                                                                                                | ARFP2_HUMAN | 37839  | 100% | 2  | 2  | 2  | 6.74%  |
| ARO-p67 (1) | (P53367) Arfaptin-1 (ADP-ribosylation factor-interacting protein 1)                                                                                                                                                                                 | ARFP1_HUMAN | 41722  | 100% | 5  | 6  | 16 | 24.70% |
| ARO-p67 (1) | (P53634) Dipeptidyl-peptidase 1 precursor (EC 3.4.14.1) (Dipeptidyl-peptidase I) (DPP-I) (DPPI) (Cathepsin C) (Cathepsin J) (Dipeptidyl transferase) [Contains: Dipeptidyl-peptidase 1 exclusion domain chain (Dipeptidyl-peptidase I exclusion dom | CATC_HUMAN  | 51824  | 100% | 10 | 14 | 62 | 38.90% |
| ARO-p67 (1) | (P54577) Tyrosyl-tRNA synthetase, cytoplasmic (EC 6.1.1.1) (Tyrosyl-tRNA ligase) (TyrRS)                                                                                                                                                            | SYYC_HUMAN  | 58996  | 100% | 12 | 13 | 40 | 31.90% |
| ARO-p67 (1) | (P54727) UV excision repair protein RAD23 homolog B (hHR23B) (XP-C repair-complementing complex 58 kDa protein) (p58)                                                                                                                               | RD23B_HUMAN | 43153  | 100% | 5  | 6  | 15 | 24.40% |
| ARO-p67 (1) | (P54753) Ephrin type-B receptor 3 precursor (EC 2.7.10.1) (Tyrosine-protein kinase receptor HEK-2)                                                                                                                                                  | EPHB3_HUMAN | 110313 | 100% | 8  | 9  | 14 | 15.60% |
| ARO-p67 (1) | (P54802) Alpha-N-acetylglucosaminidase precursor (EC 3.2.1.50) (N-acetyl-alpha-glucosaminidase) (NAG) [Contains: Alpha-N-acetylglucosaminidase 82 kDa form; Alpha-N-acetylglucosaminidase 77 kDa form]                                              | ANAG_HUMAN  | 82150  | 100% | 4  | 5  | 7  | 8.34%  |

|             |                                                                                                                                                                                                                                         |                |        |      |    |    |     |        |
|-------------|-----------------------------------------------------------------------------------------------------------------------------------------------------------------------------------------------------------------------------------------|----------------|--------|------|----|----|-----|--------|
| ARO-p67 (1) | (P54819) Adenylate kinase isoenzyme 2, mitochondrial (EC 2.7.4.3) (ATP-AMP transphosphorylase)                                                                                                                                          | KAD2_HUMAN     | 26330  | 100% | 3  | 5  | 7   | 22.70% |
| ARO-p67 (1) | (P55145) ARMET protein precursor (Arginine-rich protein)                                                                                                                                                                                | ARMET_HUMAN    | 20240  | 100% | 3  | 4  | 14  | 17.30% |
| ARO-p67 (1) | (P55327) Tumor protein D52 (N8 protein)                                                                                                                                                                                                 | TPD52_HUMAN    | 19845  | 100% | 10 | 14 | 123 | 72.80% |
| ARO-p67 (1) | (P56199) Integrin alpha-1 (Laminin and collagen receptor) (VLA-1) (CD49a antigen)                                                                                                                                                       | ITA1_HUMAN     | 127823 | 100% | 4  | 4  | 8   | 4.78%  |
| ARO-p67 (1) | (P60033) CD81 antigen (26 kDa cell surface protein TAPA-1) (Target of the antiproliferative antibody 1) (Tetraspanin-28) (Tspan-28)                                                                                                     | CD81_HUMAN     | 25792  | 100% | 3  | 3  | 8   | 25.00% |
| ARO-p67 (1) | (P60174) Triosephosphate isomerase (EC 5.3.1.1) (TIM) (Triose-phosphate isomerase)                                                                                                                                                      | TPIS_HUMAN     | 26520  | 100% | 6  | 6  | 13  | 35.50% |
| ARO-p67 (1) | (P60709) Actin, cytoplasmic 1 (Beta-actin)                                                                                                                                                                                              | ACTB_HUMAN,ACT | 41776  | 100% | 8  | 11 | 37  | 34.70% |
| ARO-p67 (1) | (P61106) Ras-related protein Rab-14                                                                                                                                                                                                     | RAB14_HUMAN    | 23748  | 100% | 5  | 5  | 7   | 39.30% |
| ARO-p67 (1) | (P61247) 40S ribosomal protein S3a                                                                                                                                                                                                      | RS3A_HUMAN     | 29796  | 100% | 2  | 2  | 5   | 9.51%  |
| ARO-p67 (1) | (P61289) Proteasome activator complex subunit 3 (Proteasome activator 28-gamma subunit) (PA28gamma) (PA28g) (Activator of multicatalytic protease subunit 3) (11S regulator complex gamma subunit) (REG-gamma) (Ki nuclear autoantigen) | PSME3_HUMAN    | 29489  | 100% | 2  | 2  | 5   | 11.80% |
| ARO-p67 (1) | (P61604) 10 kDa heat shock protein, mitochondrial (Hsp10) (10 kDa chaperonin) (CPN10) (Early-pregnancy factor) (EPF)                                                                                                                    | CH10_HUMAN     | 10783  | 100% | 3  | 4  | 13  | 37.60% |
| ARO-p67 (1) | (P61626) Lysozyme C precursor (EC 3.2.1.17) (1,4-beta-N-acetylmuramidase C)                                                                                                                                                             | LYSC_HUMAN     | 16519  | 100% | 3  | 3  | 9   | 35.10% |
| ARO-p67 (1) | (P61916) Epididymal secretory protein E1 precursor (Niemann-Pick disease type C2 protein) (hE1)                                                                                                                                         | NPC2_HUMAN     | 16552  | 100% | 7  | 8  | 49  | 68.20% |
| ARO-p67 (1) | (P61978) Heterogeneous nuclear ribonucleoprotein K (hnRNP K) (Transformation up-regulated nuclear protein) (TUNP)                                                                                                                       | HNRPK_HUMAN    | 50961  | 100% | 3  | 3  | 5   | 12.70% |
| ARO-p67 (1) | (P62081) 40S ribosomal protein S7                                                                                                                                                                                                       | RS7_HUMAN      | 22110  | 100% | 3  | 4  | 12  | 32.50% |
| ARO-p67 (1) | (P62258) 14-3-3 protein epsilon (14-3-3E)                                                                                                                                                                                               | 1433E_HUMAN    | 29157  | 100% | 2  | 3  | 8   | 11.40% |
| ARO-p67 (1) | (P62277) 40S ribosomal protein S13                                                                                                                                                                                                      | RS13_HUMAN     | 17074  | 100% | 4  | 5  | 21  | 25.30% |
| ARO-p67 (1) | (P62314) Small nuclear ribonucleoprotein Sm D1 (snRNP core protein D1) (Sm-D1) (Sm-D autoantigen)                                                                                                                                       | SMD1_HUMAN     | 13264  | 100% | 2  | 2  | 4   | 27.70% |
| ARO-p67 (1) | (P62316) Small nuclear ribonucleoprotein Sm D2 (snRNP core protein D2) (Sm-D2)                                                                                                                                                          | SMD2_HUMAN     | 13509  | 100% | 2  | 2  | 3   | 16.10% |
| ARO-p67 (1) | (P62424) 60S ribosomal protein L7a (Surfeit locus protein 3) (PLA-X polypeptide)                                                                                                                                                        | RL7A_HUMAN     | 29847  | 100% | 6  | 7  | 21  | 22.30% |
| ARO-p67 (1) | (P62805) Histone H4                                                                                                                                                                                                                     | H4_HUMAN       | 11219  | 100% | 9  | 12 | 205 | 53.90% |
| ARO-p67 (1) | (P62807) Histone H2B.a/g/h/k/l (H2B.1 A) (H2B/a) (H2B/g) (H2B/h) (H2B/k) (H2B/l)                                                                                                                                                        | H2BA_HUMAN,H2B | 13795  | 100% | 7  | 8  | 398 | 49.60% |
| ARO-p67 (1) | (P62847) 40S ribosomal protein S24                                                                                                                                                                                                      | RS24_HUMAN     | 15406  | 100% | 2  | 2  | 11  | 20.30% |
| ARO-p67 (1) | (P62851) 40S ribosomal protein S25                                                                                                                                                                                                      | RS25_HUMAN     | 13725  | 100% | 2  | 2  | 4   | 16.80% |
| ARO-p67 (1) | (P62854) 40S ribosomal protein S26                                                                                                                                                                                                      | RS26_HUMAN     | 12866  | 100% | 3  | 4  | 23  | 31.60% |
| ARO-p67 (1) | (P62888) 60S ribosomal protein L30                                                                                                                                                                                                      | RL30_HUMAN     | 12636  | 100% | 2  | 2  | 10  | 24.60% |
| ARO-p67 (1) | (P62899) 60S ribosomal protein L31                                                                                                                                                                                                      | RL31_HUMAN     | 14445  | 100% | 2  | 2  | 2   | 18.40% |
| ARO-p67 (1) | (P62906) 60S ribosomal protein L10a (CSA-19)                                                                                                                                                                                            | RL10A_HUMAN    | 24683  | 100% | 2  | 2  | 4   | 9.72%  |
| ARO-p67 (1) | (P62917) 60S ribosomal protein L8                                                                                                                                                                                                       | RL8_HUMAN      | 27876  | 100% | 2  | 2  | 3   | 10.50% |
| ARO-p67 (1) | (P62937) Peptidyl-prolyl cis-trans isomerase A (EC 5.2.1.8) (PPIase A) (Rotamase A) (Cyclophilin A) (Cyclosporin A-binding protein)                                                                                                     | PPIA_HUMAN     | 17864  | 100% | 7  | 9  | 37  | 52.40% |

## Protein Identified Sequence Coverage in ARO

|             |                                                                                                                                                                                                                                                   |                 |        |      |    |    |    |        |
|-------------|---------------------------------------------------------------------------------------------------------------------------------------------------------------------------------------------------------------------------------------------------|-----------------|--------|------|----|----|----|--------|
| ARO-p67 (1) | (P62988) Ubiquitin                                                                                                                                                                                                                                | UBIQ_HUMAN      | 8547   | 100% | 3  | 3  | 18 | 44.70% |
| ARO-p67 (1) | (P63104) 14-3-3 protein zeta/delta (Protein kinase C inhibitor protein 1) (KCIP-1)                                                                                                                                                                | 1433Z_HUMAN     | 27728  | 100% | 4  | 6  | 9  | 24.90% |
| ARO-p67 (1) | (P67809) Nuclease sensitive element-binding protein 1 (Y-box-binding protein 1) (Y-box transcription factor) (YB-1) (CCAAT-binding transcription factor I subunit A) (CBF-A) (Enhancer factor I subunit A) (EF1-A) (DNA-binding protein B) (DBPB) | YBOX1_HUMAN     | 35775  | 100% | 3  | 3  | 7  | 15.80% |
| ARO-p67 (1) | (P68104) Elongation factor 1-alpha 1 (EF-1-alpha-1) (Elongation factor 1 A-1) (eEF1A-1) (Elongation factor Tu) (EF-Tu)                                                                                                                            | EF1A1_HUMAN     | 50123  | 100% | 10 | 14 | 51 | 43.50% |
| ARO-p67 (1) | (P80188) Neutrophil gelatinase-associated lipocalin precursor (NGAL) (p25) (25 kDa alpha-2-microglobulin-related subunit of MMP-9) (Lipocalin-2) (Oncogene 24p3)                                                                                  | NGAL_HUMAN      | 22571  | 100% | 7  | 8  | 25 | 49.50% |
| ARO-p67 (1) | (P84077) ADP-ribosylation factor 1                                                                                                                                                                                                                | ARF1_HUMAN,ARF1 | 20453  | 100% | 4  | 4  | 8  | 32.20% |
| ARO-p67 (1) | (P84243) Histone H3.3                                                                                                                                                                                                                             | H33_HUMAN       | 15180  | 100% | 4  | 4  | 25 | 39.30% |
| ARO-p67 (1) | (P98160) Basement membrane-specific heparan sulfate proteoglycan core protein precursor (HSPG) (Perlecan) (PLC)                                                                                                                                   | PGBM_HUMAN      | 468788 | 100% | 3  | 3  | 5  | 1.14%  |
| ARO-p67 (1) | (P98172) Ephrin-B1 precursor (EPH-related receptor tyrosine kinase ligand 2) (LERK-2) (ELK ligand) (ELK-L)                                                                                                                                        | EFNB1_HUMAN     | 37989  | 100% | 5  | 6  | 20 | 26.30% |
| ARO-p67 (1) | (Q01082) Spectrin beta chain, brain 1 (Spectrin, non-erythroid beta chain 1) (Beta-II spectrin) (Fodrin beta chain)                                                                                                                               | SPTB2_HUMAN     | 274617 | 100% | 2  | 2  | 2  | 2.07%  |
| ARO-p67 (1) | (Q01105) Protein SET (Phosphatase 2A inhibitor I2PP2A) (I-2PP2A) (Template-activating factor I) (TAF-I) (HLA-DR-associated protein II) (PHAPII) (Inhibitor of granzyme A-activated DNase) (IGAAD)                                                 | SET_HUMAN       | 33471  | 100% | 6  | 6  | 25 | 22.80% |
| ARO-p67 (1) | (Q01130) Splicing factor, arginine/serine-rich 2 (Splicing factor SC35) (SC-35) (Splicing component, 35 kDa) (PR264 protein)                                                                                                                      | SFRS2_HUMAN     | 25328  | 100% | 2  | 2  | 4  | 11.40% |
| ARO-p67 (1) | (Q01459) Di-N-acetylchitobiase precursor (EC 3.2.1.-)                                                                                                                                                                                             | DIAC_HUMAN      | 43743  | 100% | 3  | 3  | 15 | 15.80% |
| ARO-p67 (1) | (Q01518) Adenylyl cyclase-associated protein 1 (CAP1)                                                                                                                                                                                             | CAP1_HUMAN      | 51524  | 100% | 2  | 3  | 4  | 13.10% |
| ARO-p67 (1) | (Q02487) Desmocollin-2 precursor (Desmosomal glycoprotein II and III) (Desmocollin-3)                                                                                                                                                             | DSC2_HUMAN      | 99945  | 100% | 4  | 4  | 7  | 9.10%  |
| ARO-p67 (1) | (Q02809) Procollagen-lysine,2-oxoglutarate 5-dioxygenase 1 precursor (EC 1.14.11.4) (Lysyl hydroxylase 1) (LH1)                                                                                                                                   | PLOD1_HUMAN     | 83535  | 100% | 5  | 5  | 6  | 9.35%  |
| ARO-p67 (1) | (Q02878) 60S ribosomal protein L6 (TAX-responsive enhancer element-binding protein 107) (TAXREB107) (Neoplasm-related protein C140)                                                                                                               | RL6_HUMAN       | 32580  | 100% | 9  | 9  | 27 | 30.00% |
| ARO-p67 (1) | (Q04721) Neurogenic locus notch homolog protein 2 precursor (Notch 2) (hN2) [Contains: Notch 2 extracellular truncation; Notch 2 intracellular domain]                                                                                            | NOTC2_HUMAN     | 265376 | 100% | 2  | 3  | 4  | 1.50%  |
| ARO-p67 (1) | (Q05519) Splicing factor arginine/serine-rich 11 (Arginine-rich 54 kDa nuclear protein) (p54)                                                                                                                                                     | SFR11_HUMAN     | 53526  | 100% | 3  | 4  | 16 | 10.70% |
| ARO-p67 (1) | (Q05639) Elongation factor 1-alpha 2 (EF-1-alpha-2) (Elongation factor 1 A-2) (eEF1A-2) (Statin S1)                                                                                                                                               | EF1A2_HUMAN     | 50453  | 100% | 4  | 6  | 24 | 36.50% |

## Protein Identified Sequence Coverage in ARO

|             |                                                                                                                                                                                                                                                     |                |        |      |    |    |     |        |
|-------------|-----------------------------------------------------------------------------------------------------------------------------------------------------------------------------------------------------------------------------------------------------|----------------|--------|------|----|----|-----|--------|
| ARO-p67 (1) | (Q06323) Proteasome activator complex subunit 1 (Proteasome activator 28-alpha subunit) (PA28alpha) (PA28a) (Activator of multicatalytic protease subunit 1) (11S regulator complex alpha subunit) (REG-alpha) (Interferon gamma up-regulated I-51) | PSME1_HUMAN    | 28706  | 100% | 5  | 6  | 17  | 28.50% |
| ARO-p67 (1) | (Q06830) Peroxiredoxin-1 (EC 1.11.1.15) (Thioredoxin peroxidase 2) (Thioredoxin-dependent peroxide reductase 2) (Proliferation-associated protein PAG) (Natural killer cell-enhancing factor A) (NKEF-A)                                            | PRDX1_HUMAN    | 22093  | 100% | 5  | 5  | 9   | 27.60% |
| ARO-p67 (1) | (Q07020) 60S ribosomal protein L18                                                                                                                                                                                                                  | RL18_HUMAN     | 21486  | 100% | 2  | 2  | 6   | 13.90% |
| ARO-p67 (1) | (Q07021) Complement component 1 Q subcomponent-binding protein, mitochondrial precursor (Glycoprotein gC1qBP) (C1qBP) (GC1q-R protein) (Hyaluronan-binding protein 1) (Mitochondrial matrix protein p32) (p33)                                      | C1QBP_HUMAN    | 31345  | 100% | 4  | 4  | 12  | 30.90% |
| ARO-p67 (1) | (Q07812) Apoptosis regulator BAX, membrane isoform alpha                                                                                                                                                                                            | BAXA_HUMAN,BAX | 24203  | 100% | 5  | 5  | 19  | 26.60% |
| ARO-p67 (1) | (Q07955) Splicing factor, arginine/serine-rich 1 (pre-mRNA-splicing factor SF2, P33 subunit) (Alternative splicing factor ASF-1)                                                                                                                    | SFRS1_HUMAN    | 27596  | 100% | 2  | 2  | 7   | 6.48%  |
| ARO-p67 (1) | (Q08380) Galectin-3-binding protein precursor (Lectin galactoside-binding soluble 3-binding protein) (Mac-2 binding protein) (Mac-2 BP) (MAC2BP) (Tumor-associated antigen 90K)                                                                     | LG3BP_HUMAN    | 65314  | 100% | 23 | 31 | 210 | 54.70% |
| ARO-p67 (1) | (Q08431) Lactadherin precursor (Milk fat globule-EGF factor 8) (MFG-E8) (HMFG) (Breast epithelial antigen BA46) (MFGM) [Contains: Lactadherin short form; Medin]                                                                                    | MFGM_HUMAN     | 43105  | 100% | 5  | 6  | 10  | 21.40% |
| ARO-p67 (1) | (Q09666) Neuroblast differentiation-associated protein AHNK (Desmoyokin) (Fragments)                                                                                                                                                                | AHNK_HUMAN     | 312479 | 100% | 2  | 2  | 4   | 0.81%  |
| ARO-p67 (1) | (Q13308) Tyrosine-protein kinase-like 7 precursor (Colon carcinoma kinase 4) (CCK-4)                                                                                                                                                                | PTK7_HUMAN     | 118243 | 100% | 6  | 6  | 8   | 13.60% |
| ARO-p67 (1) | (Q13427) Peptidyl-prolyl cis-trans isomerase G (EC 5.2.1.8) (Peptidyl-prolyl isomerase G) (PPIase G) (Rotamase G) (Cyclophilin G) (Clk-associating RS-cyclophilin) (CARS-cyclophilin) (CARS-Cyp) (SR-cyclophilin) (SRcyp) (SR-cyp) (CASP10)         | PPIG_HUMAN     | 88602  | 100% | 3  | 3  | 7   | 5.17%  |
| ARO-p67 (1) | (Q13428) Treacle protein (Treacher Collins syndrome protein)                                                                                                                                                                                        | TCOF_HUMAN     | 144293 | 100% | 7  | 9  | 32  | 9.71%  |
| ARO-p67 (1) | (Q13510) Acid ceramidase precursor (EC 3.5.1.23) (Acylsphingosine deacylase) (N-acylsphingosine amidohydrolase) (AC) (Putative 32 kDa heart protein) (PHP32) [Contains: Acid ceramidase alpha subunit; Acid ceramidase beta subunit]                | ASAH1_HUMAN    | 44633  | 100% | 13 | 17 | 48  | 39.70% |
| ARO-p67 (1) | (Q13523) Serine/threonine-protein kinase PRP4 homolog (EC 2.7.11.1) (PRP4 pre-mRNA-processing factor 4 homolog) (PRP4 kinase)                                                                                                                       | PRP4B_HUMAN    | 116961 | 100% | 4  | 5  | 24  | 3.38%  |
| ARO-p67 (1) | (Q13561) Dynactin subunit 2 (Dynactin complex 50 kDa subunit) (50 kDa dynein-associated polypeptide) (p50 dynamitin) (DCTN-50)                                                                                                                      | DCTN2_HUMAN    | 44083  | 100% | 2  | 2  | 4   | 8.25%  |
| ARO-p67 (1) | (Q13740) CD166 antigen precursor (Activated leukocyte-cell adhesion molecule) (ALCAM)                                                                                                                                                               | CD166_HUMAN    | 65116  | 100% | 3  | 4  | 6   | 9.61%  |

## Protein Identified Sequence Coverage in ARO

|             |                                                                                                                                                                                                 |                |        |      |    |    |     |        |
|-------------|-------------------------------------------------------------------------------------------------------------------------------------------------------------------------------------------------|----------------|--------|------|----|----|-----|--------|
| ARO-p67 (1) | (Q13751) Laminin beta-3 chain precursor (Laminin 5 beta 3) (Laminin B1k chain) (Kalinin B1 chain)                                                                                               | LAMB3_HUMAN    | 129553 | 100% | 3  | 4  | 8   | 4.95%  |
| ARO-p67 (1) | (Q14103) Heterogeneous nuclear ribonucleoprotein D0 (hnRNP D0) (AU-rich element RNA-binding protein 1)                                                                                          | HNRPD_HUMAN,HN | 38417  | 100% | 2  | 2  | 4   | 9.30%  |
| ARO-p67 (1) | (Q14108) Lysosome membrane protein 2 (Lysosome membrane protein II) (LIMP II) (Scavenger receptor class B member 2) (85 kDa lysosomal membrane sialoglycoprotein) (LGP85) (CD36 antigen-like 2) | SCRB2_HUMAN    | 54143  | 100% | 4  | 4  | 4   | 16.10% |
| ARO-p67 (1) | (Q14118) Dystroglycan precursor (Dystrophin-associated glycoprotein 1) [Contains: Alpha-dystroglycan (Alpha-DG); Beta-dystroglycan (Beta-DG)]                                                   | DAG1_HUMAN     | 97563  | 100% | 2  | 2  | 3   | 2.57%  |
| ARO-p67 (1) | (Q14126) Desmoglein-2 precursor (HDGC)                                                                                                                                                          | DSG2_HUMAN     | 122367 | 100% | 6  | 6  | 13  | 9.76%  |
| ARO-p67 (1) | (Q14697) Neutral alpha-glucosidase AB precursor (EC 3.2.1.84) (Glucosidase II alpha subunit)                                                                                                    | GANAB_HUMAN    | 106858 | 100% | 5  | 5  | 6   | 9.75%  |
| ARO-p67 (1) | (Q15059) Bromodomain-containing protein 3 (RING3-like protein)                                                                                                                                  | BRD3_HUMAN     | 79525  | 100% | 2  | 2  | 3   | 4.41%  |
| ARO-p67 (1) | (Q15084) Protein disulfide-isomerase A6 precursor (EC 5.3.4.1) (Protein disulfide isomerase P5) (Thioredoxin domain-containing protein 7)                                                       | PDIA6_HUMAN    | 48104  | 100% | 15 | 21 | 145 | 45.50% |
| ARO-p67 (1) | (Q15181) Inorganic pyrophosphatase (EC 3.6.1.1) (Pyrophosphate phospho-hydrolase) (PPase)                                                                                                       | IPYR_HUMAN     | 32643  | 100% | 5  | 5  | 13  | 30.10% |
| ARO-p67 (1) | (Q15223) Poliovirus receptor-related protein 1 precursor (Herpes virus entry mediator C) (HveC) (Nectin-1) (Herpesvirus Ig-like receptor) (HlgR) (CD111 antigen)                                | PVRL1_HUMAN    | 57140  | 100% | 3  | 3  | 5   | 9.86%  |
| ARO-p67 (1) | (Q15262) Receptor-type tyrosine-protein phosphatase kappa precursor (EC 3.1.3.48) (Protein-tyrosine phosphatase kappa) (R-PTP-kappa)                                                            | PTPRK_HUMAN    | 162071 | 100% | 3  | 3  | 5   | 3.47%  |
| ARO-p67 (1) | (Q15287) RNA-binding protein with serine-rich domain 1 (SR-related protein LDC2)                                                                                                                | RNPS1_HUMAN    | 34192  | 100% | 3  | 3  | 3   | 17.70% |
| ARO-p67 (1) | (Q15293) Reticulocalbin-1 precursor                                                                                                                                                             | RCN1_HUMAN     | 38873  | 100% | 4  | 4  | 5   | 18.40% |
| ARO-p67 (1) | (Q15758) Neutral amino acid transporter B(0) (ATB(0)) (Sodium-dependent neutral amino acid transporter type 2) (RD114/simian type D retrovirus receptor) (Baboon M7 virus receptor)             | AAAT_HUMAN     | 56582  | 100% | 3  | 3  | 6   | 8.13%  |
| ARO-p67 (1) | (Q16629) Splicing factor, arginine/serine-rich 7 (Splicing factor 9G8)                                                                                                                          | SFRS7_HUMAN    | 27350  | 100% | 2  | 2  | 7   | 8.82%  |
| ARO-p67 (1) | (Q16651) Prostaticin precursor (EC 3.4.21.-) [Contains: Prostaticin light chain; Prostaticin heavy chain]                                                                                       | PRSS8_HUMAN    | 36413  | 100% | 2  | 3  | 5   | 13.70% |
| ARO-p67 (1) | (Q16787) Laminin alpha-3 chain precursor (Epiligrin 170 kDa subunit) (E170) (Nicein alpha subunit)                                                                                              | LAMA3_HUMAN    | 189291 | 100% | 9  | 9  | 12  | 8.46%  |

## Protein Identified Sequence Coverage in ARO

|             |                                                                                                                                                                                                                                            |                 |        |      |    |    |     |        |
|-------------|--------------------------------------------------------------------------------------------------------------------------------------------------------------------------------------------------------------------------------------------|-----------------|--------|------|----|----|-----|--------|
| ARO-p67 (1) | (Q16790) Carbonic anhydrase 9 precursor (EC 4.2.1.1) (Carbonic anhydrase IX) (Carbonate dehydratase IX) (CA-IX) (CAIX) (Membrane antigen MN) (P54/58N) (Renal cell carcinoma-associated antigen G250) (RCC-associated antigen G250) (pMW1) | CAH9_HUMAN      | 49680  | 100% | 7  | 9  | 32  | 33.10% |
| ARO-p67 (1) | (Q16881) Thioredoxin reductase 1, cytoplasmic precursor (EC 1.8.1.9) (TR) (TR1)                                                                                                                                                            | TRXR1_HUMAN     | 54689  | 100% | 3  | 3  | 5   | 12.60% |
| ARO-p67 (1) | (Q5ZPR3) CD276 antigen precursor (Costimulatory molecule) (B7 homolog 3) (B7-H3) (4Ig-B7-H3)                                                                                                                                               | CD276_HUMAN     | 57216  | 100% | 3  | 3  | 5   | 10.50% |
| ARO-p67 (1) | (Q6FI13) Histone H2A type 2-A (H2A.2)                                                                                                                                                                                                      | H2A2A_HUMAN,H2A | 13840  | 100% | 5  | 7  | 134 | 58.60% |
| ARO-p67 (1) | (Q6UVK1) Chondroitin sulfate proteoglycan 4 precursor (Chondroitin sulfate proteoglycan NG2) (Melanoma chondroitin sulfate proteoglycan) (Melanoma-associated chondroitin sulfate proteoglycan)                                            | CSPG4_HUMAN     | 250476 | 100% | 14 | 16 | 28  | 11.80% |
| ARO-p67 (1) | (Q71U36) Tubulin alpha-3 chain (Alpha-tubulin 3) (Tubulin B-alpha-1)                                                                                                                                                                       | TBA3_HUMAN,TBA4 | 50134  | 100% | 5  | 5  | 6   | 20.80% |
| ARO-p67 (1) | (Q71UI9) Histone H2AV (H2A.F/Z)                                                                                                                                                                                                            | H2AV_HUMAN,H2A  | 13360  | 100% | 3  | 4  | 12  | 54.30% |
| ARO-p67 (1) | (Q7Z6E9) Retinoblastoma-binding protein 6 (p53-associated cellular protein of testis) (Proliferation potential-related protein) (Protein P2P-R) (Retinoblastoma-binding Q protein 1) (Protein RBQ-1)                                       | RBBP6_HUMAN     | 201551 | 100% | 5  | 5  | 10  | 3.85%  |
| ARO-p67 (1) | (Q7Z6Z7) HECT, UBA and WWE domain-containing protein 1 (EC 6.3.2.-) (E3 ubiquitin protein ligase URB1) (Mcl-1 ubiquitin ligase E3) (Mule) (ARF-binding protein 1) (ARF-BP1)                                                                | HUWE1_HUMAN     | 481874 | 100% | 2  | 2  | 3   | 1.19%  |
| ARO-p67 (1) | (Q86V81) THO complex subunit 4 (Tho4) (Ally of AML-1 and LEF-1) (Transcriptional coactivator Aly/REF) (bZIP-enhancing factor BEF)                                                                                                          | THOC4_HUMAN     | 26740  | 100% | 2  | 2  | 4   | 14.10% |
| ARO-p67 (1) | (Q8IYB3) Serine/arginine repetitive matrix protein 1 (Ser/Arg-related nuclear matrix protein) (SR-related nuclear matrix protein of 160 kDa) (SRm160)                                                                                      | SRRM1_HUMAN     | 102319 | 100% | 7  | 11 | 84  | 12.70% |
| ARO-p67 (1) | (Q8NBJ4) Golgi phosphoprotein 2 (Golgi membrane protein GP73)                                                                                                                                                                              | GP73_HUMAN      | 45315  | 100% | 3  | 3  | 6   | 12.20% |
| ARO-p67 (1) | (Q8NBJ7) Sulfatase-modifying factor 2 precursor (C-alpha-formylglycine-generating enzyme 2)                                                                                                                                                | SUMF2_HUMAN     | 33839  | 100% | 8  | 9  | 50  | 35.50% |
| ARO-p67 (1) | (Q8NBS9) Thioredoxin domain-containing protein 5 precursor (Thioredoxin-like protein p46) (Endoplasmic reticulum protein ERp46)                                                                                                            | TXND5_HUMAN     | 47611  | 100% | 3  | 3  | 4   | 10.40% |
| ARO-p67 (1) | (Q8TDN6) Brix domain-containing protein 2 (Ribosome biogenesis protein Brix)                                                                                                                                                               | BXDC2_HUMAN     | 41385  | 100% | 4  | 4  | 5   | 17.80% |
| ARO-p67 (1) | (Q8TEM1) Nuclear pore membrane glycoprotein 210 precursor (POM210) (Nuclear pore protein gp210)                                                                                                                                            | PO210_HUMAN     | 205105 | 100% | 2  | 2  | 2   | 1.85%  |
| ARO-p67 (1) | (Q8WXA9) Splicing factor, arginine/serine-rich 12 (Serine-arginine-rich splicing regulatory protein 86) (SRrp86) (Splicing regulatory protein 508) (SRrp508)                                                                               | SFR12_HUMAN     | 59364  | 100% | 2  | 2  | 3   | 7.48%  |
| ARO-p67 (1) | (Q92485) Acid sphingomyelinase-like phosphodiesterase 3b precursor (EC 3.1.4.-) (ASM-like phosphodiesterase 3b)                                                                                                                            | ASM3B_HUMAN     | 50796  | 100% | 11 | 16 | 87  | 45.70% |
| ARO-p67 (1) | (Q92542) Nicastrin precursor                                                                                                                                                                                                               | NICA_HUMAN      | 78394  | 100% | 2  | 2  | 2   | 4.94%  |



## Protein Identified Sequence Coverage in ARO

|             |                                                                                                                                                                                                                                                     |             |        |      |    |    |     |        |
|-------------|-----------------------------------------------------------------------------------------------------------------------------------------------------------------------------------------------------------------------------------------------------|-------------|--------|------|----|----|-----|--------|
| ARO-p67 (1) | (Q92673) Sortilin-related receptor precursor (Sorting protein-related receptor containing LDLR class A repeats) (SorLA) (SorLA-1) (Low-density lipoprotein receptor relative with 11 ligand-binding repeats) (LDLR relative with 11 ligand-binding) | SORL1_HUMAN | 248424 | 100% | 3  | 3  | 4   | 2.21%  |
| ARO-p67 (1) | (Q92692) Poliovirus receptor-related protein 2 precursor (Herpes virus entry mediator B) (HveB) (Nectin-2) (CD112 antigen)                                                                                                                          | PVRL2_HUMAN | 57724  | 100% | 5  | 6  | 22  | 15.20% |
| ARO-p67 (1) | (Q92820) Gamma-glutamyl hydrolase precursor (EC 3.4.19.9) (Gamma-Glu-X carboxypeptidase) (Conjugase) (GH)                                                                                                                                           | GGH_HUMAN   | 35948  | 100% | 7  | 10 | 53  | 32.10% |
| ARO-p67 (1) | (Q92876) Kallikrein-6 precursor (EC 3.4.21.-) (Protease M) (Neurosin) (Zyme) (SP59)                                                                                                                                                                 | KLK6_HUMAN  | 26838  | 100% | 4  | 5  | 10  | 27.90% |
| ARO-p67 (1) | (Q92896) Golgi apparatus protein 1 precursor (Golgi sialoglycoprotein MG-160) (E-selectin ligand 1) (ESL-1) (Cysteine-rich fibroblast growth factor receptor) (CFR-1)                                                                               | GSLG1_HUMAN | 134577 | 100% | 2  | 2  | 2   | 3.05%  |
| ARO-p67 (1) | (Q969H8) Protein C19orf10 precursor (Stromal cell-derived growth factor SF20) (Interleukin-25) (IL-25)                                                                                                                                              | CS010_HUMAN | 18777  | 100% | 2  | 2  | 5   | 15.60% |
| ARO-p67 (1) | (Q96HE7) ERO1-like protein alpha precursor (EC 1.8.4.-) (ERO1-Lalpha) (Oxidoreductin-1-Lalpha) (Endoplasmic oxidoreductin-1-like protein) (ERO1-L)                                                                                                  | ERO1A_HUMAN | 54377  | 100% | 24 | 36 | 189 | 63.70% |
| ARO-p67 (1) | (Q96HR9) Receptor expression-enhancing protein 6 (Polyposis locus protein 1-like 1)                                                                                                                                                                 | REEP6_HUMAN | 20716  | 100% | 2  | 2  | 5   | 12.50% |
| ARO-p67 (1) | (Q99497) Protein DJ-1 (Oncogene DJ1)                                                                                                                                                                                                                | PARK7_HUMAN | 19873  | 100% | 2  | 3  | 4   | 21.70% |
| ARO-p67 (1) | (Q99519) Sialidase-1 precursor (EC 3.2.1.18) (Lysosomal sialidase) (N-acetyl-alpha-neuraminidase 1) (Acetylneuraminyl hydrolase) (G9 sialidase)                                                                                                     | NEUR1_HUMAN | 45449  | 100% | 7  | 8  | 21  | 26.70% |
| ARO-p67 (1) | (Q99523) Sortilin precursor (Neurotensin receptor 3) (NTR3) (NT3) (Glycoprotein 95) (Gp95) (100 kDa NT receptor)                                                                                                                                    | SORT_HUMAN  | 92052  | 100% | 2  | 2  | 3   | 3.13%  |
| ARO-p67 (1) | (Q99538) Legumain precursor (EC 3.4.22.34) (Asparaginyl endopeptidase) (Protease, cysteine 1)                                                                                                                                                       | LGMN_HUMAN  | 49393  | 100% | 6  | 6  | 25  | 21.90% |
| ARO-p67 (1) | (Q99988) Growth/differentiation factor 15 precursor (GDF-15) (Placental bone morphogenic protein) (Placental TGF-beta) (Macrophage inhibitory cytokine 1) (MIC-1) (Prostate differentiation factor) (NSAID-regulated protein 1) (NRG-1)             | GDF15_HUMAN | 34151  | 100% | 7  | 8  | 16  | 30.50% |
| ARO-p67 (1) | (Q9BS26) Thioredoxin domain-containing protein 4 precursor (Endoplasmic reticulum resident protein ERp44)                                                                                                                                           | TXND4_HUMAN | 46955  | 100% | 8  | 8  | 21  | 30.50% |
| ARO-p67 (1) | (Q9BUL8) Programmed cell death protein 10 (TF-1 cell apoptosis-related protein 15) (Cerebral cavernous malformations 3 protein)                                                                                                                     | PDC10_HUMAN | 24685  | 100% | 2  | 2  | 4   | 16.00% |
| ARO-p67 (1) | (Q9GZM7) Tubulointerstitial nephritis antigen-like precursor (Tubulointerstitial nephritis antigen-related protein) (TIN Ag-related protein) (TIN-Ag-RP) (Glucocorticoid-inducible protein 5) (Oxidized LDL-responsive gene 2 protein) (OLRG-2)     | TINAL_HUMAN | 52369  | 100% | 5  | 5  | 6   | 24.60% |

## Protein Identified Sequence Coverage in ARO

|             |                                                                                                                                                                                                                              |             |        |      |    |    |     |        |
|-------------|------------------------------------------------------------------------------------------------------------------------------------------------------------------------------------------------------------------------------|-------------|--------|------|----|----|-----|--------|
| ARO-p67 (1) | (Q9H3G5) Probable serine carboxypeptidase CPVL precursor (EC 3.4.16.-) (Carboxypeptidase, vitellogenic-like) (Vitellogenic carboxypeptidase-like protein) (VCP-like protein) (HVLFP)                                         | CPVL_HUMAN  | 54148  | 100% | 9  | 13 | 47  | 27.10% |
| ARO-p67 (1) | (Q9H5V8) CUB domain-containing protein 1 precursor (Transmembrane and associated with src kinases) (Membrane glycoprotein gp140) (Subtractive immunization M plus HEp3 associated 135 kDa protein) (SIMA135) (CD318 antigen) | CDCP1_HUMAN | 92858  | 100% | 2  | 2  | 4   | 3.23%  |
| ARO-p67 (1) | (Q9H5Y7) SLIT and NTRK-like protein 6 precursor                                                                                                                                                                              | SLIK6_HUMAN | 95096  | 100% | 5  | 5  | 9   | 12.40% |
| ARO-p67 (1) | (Q9HAT2) Sialate O-acetyltransferase precursor (EC 3.1.1.53) (Sialic acid-specific 9-O-acetyltransferase) (H-Lse)                                                                                                            | SIAE_HUMAN  | 58297  | 100% | 9  | 11 | 44  | 33.50% |
| ARO-p67 (1) | (Q9HDC9) Adipocyte plasma membrane-associated protein (BSCv protein)                                                                                                                                                         | APMAP_HUMAN | 46464  | 100% | 4  | 4  | 10  | 14.90% |
| ARO-p67 (1) | (Q9NPR2) Semaphorin-4B precursor                                                                                                                                                                                             | SEM4B_HUMAN | 92176  | 100% | 2  | 2  | 3   | 3.00%  |
| ARO-p67 (1) | (Q9NX58) Cell growth-regulating nucleolar protein                                                                                                                                                                            | LYAR_HUMAN  | 43597  | 100% | 8  | 8  | 25  | 36.40% |
| ARO-p67 (1) | (Q9NYU2) UDP-glucose:glycoprotein glucosyltransferase 1 precursor (EC 2.4.1.-) (UDP-glucose ceramide glucosyltransferase-like 1) (UDP--Glc:glycoprotein glucosyltransferase) (HUGT1)                                         | UGGG1_HUMAN | 174965 | 100% | 4  | 4  | 6   | 6.14%  |
| ARO-p67 (1) | (Q9P2B2) Prostaglandin F2 receptor negative regulator precursor (Prostaglandin F2-alpha receptor regulatory protein) (Prostaglandin F2-alpha receptor-associated protein) (CD9 partner 1) (CD9P-1) (CD315 antigen)           | FPRP_HUMAN  | 98538  | 100% | 6  | 7  | 10  | 9.67%  |
| ARO-p67 (1) | (Q9P2E9) Ribosome-binding protein 1 (Ribosome receptor protein) (180 kDa ribosome receptor homolog) (ES/130-related protein)                                                                                                 | RRBP1_HUMAN | 152453 | 100% | 3  | 3  | 3   | 5.32%  |
| ARO-p67 (1) | (Q9UBR2) Cathepsin Z precursor (EC 3.4.22.-) (Cathepsin X) (Cathepsin P)                                                                                                                                                     | CATZ_HUMAN  | 33850  | 100% | 7  | 9  | 38  | 35.60% |
| ARO-p67 (1) | (Q9UBS4) DnaJ homolog subfamily B member 11 precursor (ER-associated dnaJ protein 3) (ErJ3) (ER-associated Hsp40 co-chaperone) (hDj9) (PWP1-interacting protein 4)                                                           | DNJBB_HUMAN | 40497  | 100% | 4  | 5  | 13  | 14.20% |
| ARO-p67 (1) | (Q9UHG3) Prenylcysteine oxidase precursor (EC 1.8.3.5) (PCL1)                                                                                                                                                                | PCYOX_HUMAN | 56595  | 100% | 5  | 7  | 11  | 14.50% |
| ARO-p67 (1) | (Q9UHL4) Dipeptidyl-peptidase 2 precursor (EC 3.4.14.2) (Dipeptidyl-peptidase II) (DPP II) (Dipeptidyl aminopeptidase II) (Quiescent cell proline dipeptidase) (Dipeptidyl peptidase 7)                                      | DPP2_HUMAN  | 54311  | 100% | 15 | 22 | 116 | 47.40% |
| ARO-p67 (1) | (Q9UL46) Proteasome activator complex subunit 2 (Proteasome activator 28-beta subunit) (PA28beta) (PA28b) (Activator of multicatalytic protease subunit 2) (11S regulator complex beta subunit) (REG-beta)                   | PSME2_HUMAN | 27213  | 100% | 5  | 8  | 28  | 27.70% |
| ARO-p67 (1) | (Q9UMR5) Palmitoyl-protein thioesterase 2 precursor (EC 3.1.2.22) (Palmitoyl-protein hydrolase 2) (PPT-2) (G14)                                                                                                              | PPT2_HUMAN  | 34291  | 100% | 2  | 2  | 2   | 15.60% |

## Protein Identified Sequence Coverage in ARO

|             |                                                                                                                                                                                                                                               |             |        |      |    |    |     |        |
|-------------|-----------------------------------------------------------------------------------------------------------------------------------------------------------------------------------------------------------------------------------------------|-------------|--------|------|----|----|-----|--------|
| ARO-p67 (1) | (Q9UNW1) Multiple inositol polyphosphate phosphatase 1 precursor (EC 3.1.3.62) (Inositol (1,3,4,5)-tetrakisphosphate 3-phosphatase) (Ins(1,3,4,5)P(4) 3-phosphatase)                                                                          | MINP1_HUMAN | 55035  | 100% | 11 | 13 | 41  | 34.30% |
| ARO-p67 (1) | (Q9UPT8) Zinc finger CCCH-type domain-containing protein C19orf7                                                                                                                                                                              | CS007_HUMAN | 140242 | 100% | 2  | 2  | 2   | 5.22%  |
| ARO-p67 (1) | (Q9Y251) Heparanase precursor (EC 3.2.-.-) (Heparanase-1) (Hpa1) (Endo-glucuronidase) [Contains: Heparanase 8 kDa subunit; Heparanase 50 kDa subunit]                                                                                         | HPSE_HUMAN  | 61162  | 100% | 3  | 3  | 7   | 7.18%  |
| ARO-p67 (1) | (Q9Y2B0) MIR-interacting saposin-like protein precursor (Transmembrane protein 4) (Putative secreted protein ZSIG9)                                                                                                                           | MSAP_HUMAN  | 20635  | 100% | 5  | 7  | 22  | 34.60% |
| ARO-p67 (1) | (Q9Y2E5) Epididymis-specific alpha-mannosidase precursor (EC 3.2.1.24) (Mannosidase alpha class 2B member 2)                                                                                                                                  | MA2B2_HUMAN | 113870 | 100% | 8  | 9  | 13  | 11.30% |
| ARO-p67 (1) | (Q9Y4L1) 150 kDa oxygen-regulated protein precursor (Orp150) (Hypoxia up-regulated 1)                                                                                                                                                         | OXR_P_HUMAN | 111319 | 100% | 48 | 68 | 468 | 61.60% |
| ARO-p67 (1) | (Q9Y5Y6) Suppressor of tumorigenicity protein 14 (EC 3.4.21.-) (Serine protease 14) (Matriptase) (Membrane-type serine protease 1) (MT-SP1) (Prostamin) (Serine protease TADG-15) (Tumor-associated differentially-expressed gene 15 protein) | ST14_HUMAN  | 94751  | 100% | 14 | 18 | 53  | 28.80% |
| ARO-p67 (1) | (Q9Y624) Junctional adhesion molecule A precursor (JAM-A) (Junctional adhesion molecule 1) (JAM-1) (Platelet adhesion molecule 1) (PAM-1) (Platelet F11 receptor) (CD321 antigen)                                                             | JAM1_HUMAN  | 32565  | 100% | 2  | 3  | 3   | 14.00% |

**Proteins Identified and Their Sequence Coverage in DRO-1 Cell Line**

Experiment: DRO-p54-p56-112008

Peak List Generator:

Version: Bioworks 3.3.1  
Charge States Calculated: yes  
Deisotoped: no

Database Set:

Database Name: uniprot\_060206.fasta  
Version: 060206  
Taxonomy: Homo sapiens  
Number of Proteins: 14164

Search Engine Set: 2 Search Engines

Search Engine: Mascot

Version: Mascot  
Samples: All Samples  
Fragment Tolerance: 0.80 Da (Monoisotopic)  
Parent Tolerance: 1.6 Da (Monoisotopic)  
Fixed Modifications: +57 on C (Carbamidomethyl)  
Variable Modifications: +1 on N (Deamidation), +16 on M (Oxidation)  
Database: Sprot\_060206.fasta (selected for Homo sapiens, unknown version, 14164 entries)  
Digestion Enzyme: Trypsin  
Max Missed Cleavages: 2

Search Engine: X! Tandem

Version: 2007.01.01.1  
Samples: All Samples  
Fragment Tolerance: 0.80 Da (Monoisotopic)  
Parent Tolerance: 1.6 Da (Monoisotopic)  
Fixed Modifications: +57 on C (Carbamidomethyl)  
Variable Modifications: +1 on N (Deamidation), +16 on M (Oxidation)  
Database: uniprot\_sprot\_060206  
Digestion Enzyme: Trypsin  
Max Missed Cleavages: 2

Scaffold Version: Scaffold\_2\_01\_02

Peptide Thresholds: X! Tandem: -Log(Expect Scores) scores of greater than 3.0, Mascot: ion scores must be greater than both the a  
Protein Thresholds: 2 peptides minimum

| Biological sample name | Protein name                                                                                                                                                                                                                                       | Protein accession numbers | Protein molecular weight (Da) | Protein identification probability | Number of unique peptides | Number of unique spectra | Number of total spectra | Percentage of total spectra | Percentage sequence coverage |
|------------------------|----------------------------------------------------------------------------------------------------------------------------------------------------------------------------------------------------------------------------------------------------|---------------------------|-------------------------------|------------------------------------|---------------------------|--------------------------|-------------------------|-----------------------------|------------------------------|
| DRO-p54                | (O00115) Deoxyribonuclease-2-alpha precursor (EC 3.1.22.1) (Deoxyribonuclease II alpha) (DNase II alpha) (Acid DNase) (Lysosomal DNase II) (R31240_2)                                                                                              | DNS2A_HUMAN               | 39563                         | 100%                               | 6                         | 6                        | 37                      | 0.04%                       | 29.40%                       |
| DRO-p54                | (O00231) 26S proteasome non-ATPase regulatory subunit 11 (26S proteasome regulatory subunit S9) (26S proteasome regulatory subunit p44.5)                                                                                                          | PSD11_HUMAN               | 47317                         | 100%                               | 2                         | 2                        | 3                       | 0.00%                       | 6.65%                        |
| DRO-p54                | (O00567) Nucleolar protein Nop56 (Nucleolar protein 5A)                                                                                                                                                                                            | NOP56_HUMAN               | 66020                         | 100%                               | 2                         | 2                        | 3                       | 0.00%                       | 8.75%                        |
| DRO-p54                | (O00754) Lysosomal alpha-mannosidase precursor (EC 3.2.1.24) (Mannosidase, alpha B) (Lysosomal acid alpha-mannosidase) (Laman) (Mannosidase alpha class 2B member 1) [Contains: Lysosomal alpha-mannosidase A peptide; Lysosomal alpha-mannosidase | MA2B1_HUMAN               | 113656                        | 100%                               | 4                         | 4                        | 6                       | 0.01%                       | 5.94%                        |

## Protein Identified Sequence Coverage in DRO-1

|         |                                                                                                                                                                                                                                                      |             |        |      |    |    |      |       |        |
|---------|------------------------------------------------------------------------------------------------------------------------------------------------------------------------------------------------------------------------------------------------------|-------------|--------|------|----|----|------|-------|--------|
| DRO-p54 | (O14773) Tripeptidyl-peptidase 1 precursor (EC 3.4.14.9) (Tripeptidyl-peptidase I) (TPP-I) (Tripeptidyl aminopeptidase) (Lysosomal pepstatin insensitive protease) (LPIC) (Growth-inhibiting gene 1 protein)                                         | TPP1_HUMAN  | 61230  | 100% | 11 | 14 | 68   | 0.08% | 43.20% |
| DRO-p54 | (O15260) Surfeit locus protein 4                                                                                                                                                                                                                     | SURF4_HUMAN | 30377  | 99%  | 2  | 2  | 2    | 0.00% | 12.60% |
| DRO-p54 | (O43175) D-3-phosphoglycerate dehydrogenase (EC 1.1.1.95) (3-PGDH)                                                                                                                                                                                   | SERA_HUMAN  | 56501  | 100% | 3  | 3  | 3    | 0.00% | 7.14%  |
| DRO-p54 | (O43399) Tumor protein D54 (hD54) (Tumor protein D52-like 2)                                                                                                                                                                                         | TPD54_HUMAN | 22220  | 100% | 10 | 13 | 70   | 0.08% | 55.80% |
| DRO-p54 | (O43505) N-acetylglucosaminide beta-1,3-N-acetylglucosaminyltransferase (EC 2.4.1.149) (Poly-N-acetylglucosamine extension enzyme) (I-beta-1,3-N-acetylglucosaminyltransferase) (iGnT) (UDP-GlcNAc:betaGal beta-1,3-N-acetylglucosaminyltransferase) | B3GN6_HUMAN | 47101  | 100% | 3  | 3  | 3    | 0.00% | 12.30% |
| DRO-p54 | (O43707) Alpha-actinin-4 (Non-muscle alpha-actinin 4) (F-actin cross linking protein)                                                                                                                                                                | ACTN4_HUMAN | 104839 | 100% | 15 | 16 | 50   | 0.06% | 25.90% |
| DRO-p54 | (O43809) Cleavage and polyadenylation specificity factor 5 (Cleavage and polyadenylation specificity factor 25 kDa subunit) (CPSF 25 kDa subunit) (PremRNA cleavage factor Im 25-kDa subunit) (Nucleoside diphosphate-linked moiety X motif 21) (    | CPSF5_HUMAN | 26210  | 100% | 4  | 4  | 11   | 0.01% | 32.60% |
| DRO-p54 | (O43852) Calumenin precursor (Crocabin) (IEF SSP 9302)                                                                                                                                                                                               | CALU_HUMAN  | 37090  | 100% | 6  | 6  | 13   | 0.01% | 28.60% |
| DRO-p54 | (O60568) Procollagen-lysine,2-oxoglutarate 5-dioxygenase 3 precursor (EC 1.14.11.4) (Lysyl hydroxylase 3) (LH3)                                                                                                                                      | PLOD3_HUMAN | 84769  | 100% | 12 | 12 | 29   | 0.03% | 20.60% |
| DRO-p54 | (O75367) Core histone macro-H2A.1 (Histone macroH2A1) (mH2A1) (H2A.y) (H2A/y) (Medulloblastoma antigen MU-MB-50.205)                                                                                                                                 | H2AY_HUMAN  | 39470  | 100% | 8  | 9  | 14   | 0.02% | 38.80% |
| DRO-p54 | (O75882) Attractin precursor (Mahogany homolog) (DPPT-L)                                                                                                                                                                                             | ATRN_HUMAN  | 158518 | 100% | 2  | 2  | 2    | 0.00% | 1.54%  |
| DRO-p54 | (O76021) Ribosomal L1 domain-containing protein 1 (Cellular senescence-inhibited gene protein) (PBK1 protein) (CATX-11)                                                                                                                              | RL1D1_HUMAN | 54957  | 100% | 4  | 4  | 13   | 0.01% | 8.37%  |
| DRO-p54 | (O95573) Long-chain-fatty-acid--CoA ligase 3 (EC 6.2.1.3) (Long-chain acyl-CoA synthetase 3) (LACS 3)                                                                                                                                                | ACSL3_HUMAN | 80391  | 100% | 3  | 3  | 3    | 0.00% | 6.81%  |
| DRO-p54 | (P00338) L-lactate dehydrogenase A chain (EC 1.1.1.27) (LDH-A) (LDH muscle subunit) (LDH-M) (Proliferation-inducing gene 19 protein) (NY-REN-59 antigen)                                                                                             | LDHA_HUMAN  | 36540  | 100% | 7  | 8  | 46   | 0.05% | 29.90% |
| DRO-p54 | (P00558) Phosphoglycerate kinase 1 (EC 2.7.2.3) (Primer recognition protein 2) (PRP 2)                                                                                                                                                               | PGK1_HUMAN  | 44466  | 100% | 8  | 10 | 31   | 0.03% | 30.00% |
| DRO-p54 | (P00750) Tissue-type plasminogen activator precursor (EC 3.4.21.68) (tPA) (t-PA) (t-plasminogen activator) (Alteplase) (Retepase) [Contains: Tissue-type plasminogen activator chain A; Tissue-type plasminogen activator chain B]                   | TPA_HUMAN   | 62899  | 100% | 4  | 4  | 6    | 0.01% | 14.80% |
| DRO-p54 | (P01011) Alpha-1-antichymotrypsin precursor (ACT) [Contains: Alpha-1-antichymotrypsin His-Pro-less]                                                                                                                                                  | AACT_HUMAN  | 47635  | 100% | 36 | 54 | 2846 | 3.18% | 70.40% |

## Protein Identified Sequence Coverage in DRO-1

|         |                                                                                                                                                                                                       |             |        |      |    |    |     |       |        |
|---------|-------------------------------------------------------------------------------------------------------------------------------------------------------------------------------------------------------|-------------|--------|------|----|----|-----|-------|--------|
| DRO-p54 | (P01023) Alpha-2-macroglobulin precursor (Alpha-2-M)                                                                                                                                                  | A2MG_HUMAN  | 163259 | 100% | 10 | 11 | 17  | 0.02% | 11.90% |
| DRO-p54 | (P01033) Metalloproteinase inhibitor 1 precursor (TIMP-1) (Erythroid potentiating activity) (EPA) (Tissue inhibitor of metalloproteinases) (Fibroblast collagenase inhibitor) (Collagenase inhibitor) | TIMP1_HUMAN | 23153  | 100% | 2  | 2  | 5   | 0.01% | 16.40% |
| DRO-p54 | (P02462) Collagen alpha-1(IV) chain precursor                                                                                                                                                         | CO4A1_HUMAN | 160596 | 100% | 5  | 6  | 17  | 0.02% | 5.45%  |
| DRO-p54 | (P02768) Serum albumin precursor                                                                                                                                                                      | ALBU_HUMAN  | 69349  | 100% | 3  | 3  | 9   | 0.01% | 8.05%  |
| DRO-p54 | (P02787) Serotransferrin precursor (Transferrin) (Siderophilin) (Beta-1-metal-binding globulin)                                                                                                       | TRFE_HUMAN  | 77032  | 100% | 28 | 32 | 183 | 0.20% | 54.90% |
| DRO-p54 | (P04004) Vitronectin precursor (Serum spreading factor) (S-protein) (V75) [Contains: Vitronectin V65 subunit; Vitronectin V10 subunit; Somatomedin B]                                                 | VTNC_HUMAN  | 54288  | 100% | 2  | 2  | 5   | 0.01% | 8.79%  |
| DRO-p54 | (P04062) Glucosylceramidase precursor (EC 3.2.1.45) (Beta-glucocerebrosidase) (Acid beta-glucosidase) (D-glucosyl-N-acylsphingosine glucohydrolase) (Alglucerase) (Imiglucerase)                      | GLCM_HUMAN  | 59700  | 100% | 6  | 9  | 24  | 0.03% | 21.50% |
| DRO-p54 | (P04075) Fructose-bisphosphate aldolase A (EC 4.1.2.13) (Muscle-type aldolase) (Lung cancer antigen NY-LU-1)                                                                                          | ALDOA_HUMAN | 39271  | 100% | 6  | 7  | 15  | 0.02% | 23.10% |
| DRO-p54 | (P04083) Annexin A1 (Annexin I) (Lipocortin I) (Calpactin II) (Chromobindin-9) (p35) (Phospholipase A2 inhibitory protein)                                                                            | ANXA1_HUMAN | 38567  | 100% | 9  | 11 | 47  | 0.05% | 40.00% |
| DRO-p54 | (P04264) Keratin, type II cytoskeletal 1 (Cytokeratin-1) (CK-1) (Keratin-1) (K1) (67 kDa cyokeratin) (Hair alpha protein)                                                                             | K2C1_HUMAN  | 65870  | 100% | 8  | 9  | 37  | 0.04% | 22.90% |
| DRO-p54 | (P04406) Glyceraldehyde-3-phosphate dehydrogenase (EC 1.2.1.12) (GAPDH)                                                                                                                               | G3P_HUMAN   | 35904  | 100% | 6  | 7  | 36  | 0.04% | 37.70% |
| DRO-p54 | (P04843) Dolichyl-diphosphooligosaccharide--protein glycosyltransferase 67 kDa subunit precursor (EC 2.4.1.119) (Ribophorin I) (RPN-I)                                                                | RIB1_HUMAN  | 68553  | 100% | 2  | 2  | 3   | 0.00% | 9.39%  |
| DRO-p54 | (P04844) Dolichyl-diphosphooligosaccharide--protein glycosyltransferase 63 kDa subunit precursor (EC 2.4.1.119) (Ribophorin II) (RPN-II) (RIBIIR)                                                     | RIB2_HUMAN  | 69267  | 100% | 4  | 5  | 8   | 0.01% | 12.20% |
| DRO-p54 | (P05023) Sodium/potassium-transporting ATPase alpha-1 chain precursor (EC 3.6.3.9) (Sodium pump 1) (Na+/K+ ATPase 1)                                                                                  | AT1A1_HUMAN | 112882 | 100% | 12 | 13 | 29  | 0.03% | 19.60% |
| DRO-p54 | (P05026) Sodium/potassium-transporting ATPase subunit beta-1 (Sodium/potassium-dependent ATPase beta-1 subunit)                                                                                       | AT1B1_HUMAN | 35045  | 100% | 2  | 2  | 2   | 0.00% | 11.20% |
| DRO-p54 | (P05090) Apolipoprotein D precursor (Apo-D) (ApoD)                                                                                                                                                    | APOD_HUMAN  | 21258  | 100% | 2  | 2  | 5   | 0.01% | 13.80% |
| DRO-p54 | (P05106) Integrin beta-3 precursor (Platelet membrane glycoprotein IIIa) (GPIIIa) (CD61 antigen)                                                                                                      | ITB3_HUMAN  | 87196  | 100% | 4  | 4  | 7   | 0.01% | 10.50% |
| DRO-p54 | (P05362) Intercellular adhesion molecule 1 precursor (ICAM-1) (Major group rhinovirus receptor) (CD54 antigen)                                                                                        | ICAM1_HUMAN | 57807  | 100% | 15 | 15 | 56  | 0.06% | 43.40% |
| DRO-p54 | (P05387) 60S acidic ribosomal protein P2 (NY-REN-44 antigen)                                                                                                                                          | RLA2_HUMAN  | 11647  | 100% | 3  | 5  | 6   | 0.01% | 53.00% |
| DRO-p54 | (P05388) 60S acidic ribosomal protein P0 (L10E)                                                                                                                                                       | RLA0_HUMAN  | 34256  | 100% | 4  | 4  | 6   | 0.01% | 20.80% |

## Protein Identified Sequence Coverage in DRO-1

|         |                                                                                                                                                                                                                                                      |             |       |      |    |    |     |       |        |
|---------|------------------------------------------------------------------------------------------------------------------------------------------------------------------------------------------------------------------------------------------------------|-------------|-------|------|----|----|-----|-------|--------|
| DRO-p54 | (P06396) Gelsolin precursor (Actin-depolymerizing factor) (ADF) (Brevin) (AGEL)                                                                                                                                                                      | GELS_HUMAN  | 85680 | 100% | 4  | 5  | 6   | 0.01% | 9.21%  |
| DRO-p54 | (P06576) ATP synthase beta chain, mitochondrial precursor (EC 3.6.3.14)                                                                                                                                                                              | ATPB_HUMAN  | 56543 | 100% | 3  | 3  | 5   | 0.01% | 12.70% |
| DRO-p54 | (P06733) Alpha-enolase (EC 4.2.1.11) (2-phospho-D-glycerate hydro-lyase) (Non-neural enolase) (NNE) (Enolase 1) (Phosphopyruvate hydratase) (C-myc promoter-binding protein) (MBP-1) (MPB-1) (Plasminogen-binding protein)                           | ENOA_HUMAN  | 47021 | 100% | 15 | 22 | 171 | 0.19% | 56.80% |
| DRO-p54 | (P06737) Glycogen phosphorylase, liver form (EC 2.4.1.1)                                                                                                                                                                                             | PYGL_HUMAN  | 97003 | 100% | 2  | 2  | 3   | 0.00% | 7.80%  |
| DRO-p54 | (P06744) Glucose-6-phosphate isomerase (EC 5.3.1.9) (GPI) (Phosphoglucose isomerase) (PGI) (Phosphohexose isomerase) (PHI) (Neuroleukin) (NLK) (Sperm antigen 36) (SA-36)                                                                            | G6PI_HUMAN  | 62999 | 100% | 4  | 6  | 17  | 0.02% | 14.90% |
| DRO-p54 | (P06748) Nucleophosmin (NPM) (Nucleolar phosphoprotein B23) (Numatrin) (Nucleolar protein NO38)                                                                                                                                                      | NPM_HUMAN   | 32557 | 100% | 5  | 7  | 50  | 0.06% | 25.90% |
| DRO-p54 | (P06865) Beta-hexosaminidase alpha chain precursor (EC 3.2.1.52) (N-acetyl-beta-glucosaminidase) (Beta-N-acetylhexosaminidase) (Hexosaminidase A)                                                                                                    | HEXA_HUMAN  | 60672 | 100% | 16 | 18 | 63  | 0.07% | 40.50% |
| DRO-p54 | (P07093) Glia-derived nexin precursor (GDN) (Protease nexin I) (PN-1) (Protease inhibitor 7)                                                                                                                                                         | GDN_HUMAN   | 43985 | 100% | 2  | 2  | 6   | 0.01% | 8.04%  |
| DRO-p54 | (P07195) L-lactate dehydrogenase B chain (EC 1.1.1.27) (LDH-B) (LDH heart subunit) (LDH-H) (NY-REN-46 antigen)                                                                                                                                       | LDHB_HUMAN  | 36489 | 100% | 4  | 4  | 24  | 0.03% | 16.80% |
| DRO-p54 | (P07237) Protein disulfide-isomerase precursor (EC 5.3.4.1) (PDI) (Prolyl 4-hydroxylase beta subunit) (Cellular thyroid hormone-binding protein) (p55)                                                                                               | PDIA1_HUMAN | 57100 | 100% | 19 | 24 | 161 | 0.18% | 50.80% |
| DRO-p54 | (P07339) Cathepsin D precursor (EC 3.4.23.5) [Contains: Cathepsin D light chain; Cathepsin D heavy chain]                                                                                                                                            | CATD_HUMAN  | 44535 | 100% | 16 | 22 | 195 | 0.22% | 52.40% |
| DRO-p54 | (P07355) Annexin A2 (Annexin II) (Lipocortin II) (Calpactin I heavy chain) (Chromobindin-8) (p36) (Protein I) (Placental anticoagulant protein IV) (PAP-IV)                                                                                          | ANXA2_HUMAN | 38457 | 100% | 10 | 12 | 32  | 0.04% | 39.10% |
| DRO-p54 | (P07437) Tubulin beta-2 chain                                                                                                                                                                                                                        | TBB2_HUMAN  | 49653 | 100% | 17 | 20 | 128 | 0.14% | 62.60% |
| DRO-p54 | (P07602) Proactivator polypeptide precursor [Contains: Saposin A (Protein A); Saposin B-Val; Saposin B (Sphingolipid activator protein 1) (SAP-1) (Cerebroside sulfate activator) (CSAct) (Dispersin) (Sulfatide/GM1 activator); Saposin C (Co-beta- | SAP_HUMAN   | 58094 | 100% | 27 | 38 | 540 | 0.60% | 56.70% |
| DRO-p54 | (P07686) Beta-hexosaminidase beta chain precursor (EC 3.2.1.52) (N-acetyl-beta-glucosaminidase) (Beta-N-acetylhexosaminidase) (Hexosaminidase B) (Cervical cancer proto-oncogene 7) (HCC-7) [Contains: Beta-hexosaminidase beta-B chain; Beta-hexos  | HEXB_HUMAN  | 63095 | 100% | 11 | 13 | 67  | 0.07% | 35.30% |

## Protein Identified Sequence Coverage in DRO-1

|         |                                                                                                                                                                                                                               |             |        |      |    |    |     |       |        |
|---------|-------------------------------------------------------------------------------------------------------------------------------------------------------------------------------------------------------------------------------|-------------|--------|------|----|----|-----|-------|--------|
| DRO-p54 | (P07711) Cathepsin L precursor (EC 3.4.22.15) (Major excreted protein) (MEP) [Contains: Cathepsin L heavy chain; Cathepsin L light chain]                                                                                     | CATL_HUMAN  | 37546  | 100% | 11 | 14 | 73  | 0.08% | 52.90% |
| DRO-p54 | (P07737) Profilin-1 (Profilin I)                                                                                                                                                                                              | PROF1_HUMAN | 14905  | 100% | 2  | 2  | 5   | 0.01% | 21.60% |
| DRO-p54 | (P07858) Cathepsin B precursor (EC 3.4.22.1) (Cathepsin B1) (APP secretase) (APPS) [Contains: Cathepsin B light chain; Cathepsin B heavy chain]                                                                               | CATB_HUMAN  | 37803  | 100% | 12 | 16 | 228 | 0.25% | 47.20% |
| DRO-p54 | (P07900) Heat shock protein HSP 90-alpha (HSP 86) (NY-REN-38 antigen)                                                                                                                                                         | HS90A_HUMAN | 84514  | 100% | 13 | 15 | 47  | 0.05% | 25.20% |
| DRO-p54 | (P07942) Laminin beta-1 chain precursor (Laminin B1 chain)                                                                                                                                                                    | LAMB1_HUMAN | 198045 | 100% | 20 | 23 | 84  | 0.09% | 19.80% |
| DRO-p54 | (P08133) Annexin A6 (Annexin VI) (Lipocortin VI) (P68) (P70) (Protein III) (Chromobindin-20) (67 kDa calelectrin) (Calphobindin-II) (CPB-II)                                                                                  | ANXA6_HUMAN | 75728  | 100% | 3  | 4  | 6   | 0.01% | 9.52%  |
| DRO-p54 | (P08174) Complement decay-accelerating factor precursor (CD55 antigen)                                                                                                                                                        | DAF_HUMAN   | 41382  | 100% | 9  | 9  | 26  | 0.03% | 33.10% |
| DRO-p54 | (P08195) 4F2 cell-surface antigen heavy chain (4F2hc) (Lymphocyte activation antigen 4F2 large subunit) (4F2 heavy chain antigen) (CD98 antigen)                                                                              | 4F2_HUMAN   | 57929  | 100% | 5  | 5  | 22  | 0.02% | 14.20% |
| DRO-p54 | (P08236) Beta-glucuronidase precursor (EC 3.2.1.31) (Beta-G1)                                                                                                                                                                 | BGLR_HUMAN  | 74699  | 100% | 8  | 8  | 17  | 0.02% | 16.40% |
| DRO-p54 | (P08238) Heat shock protein HSP 90-beta (HSP 84) (HSP 90)                                                                                                                                                                     | HS90B_HUMAN | 83118  | 100% | 9  | 13 | 31  | 0.03% | 35.70% |
| DRO-p54 | (P08294) Extracellular superoxide dismutase [Cu-Zn] precursor (EC 1.15.1.1) (EC-SOD)                                                                                                                                          | SODE_HUMAN  | 25832  | 100% | 7  | 9  | 45  | 0.05% | 35.40% |
| DRO-p54 | (P08572) Collagen alpha-2(IV) chain precursor                                                                                                                                                                                 | CO4A2_HUMAN | 167522 | 100% | 8  | 8  | 28  | 0.03% | 9.70%  |
| DRO-p54 | (P08582) Melanotransferrin precursor (Melanoma-associated antigen p97) (CD228 antigen)                                                                                                                                        | TRFM_HUMAN  | 80223  | 100% | 6  | 6  | 8   | 0.01% | 17.20% |
| DRO-p54 | (P08648) Integrin alpha-5 precursor (Fibronectin receptor alpha subunit) (Integrin alpha-F) (VLA-5) (CD49e antigen) [Contains: Integrin alpha-5 heavy chain; Integrin alpha-5 light chain]                                    | ITA5_HUMAN  | 114521 | 100% | 2  | 2  | 3   | 0.00% | 3.05%  |
| DRO-p54 | (P08670) Vimentin                                                                                                                                                                                                             | VIME_HUMAN  | 53503  | 100% | 8  | 10 | 29  | 0.03% | 27.50% |
| DRO-p54 | (P08758) Annexin A5 (Annexin V) (Lipocortin V) (Endonexin II) (Calphobindin I) (CBP-I) (Placental anticoagulant protein I) (PAP-I) (PP4) (Thromboplastin inhibitor) (Vascular anticoagulant-alpha) (VAC-alpha) (Anchorin CII) | ANXA5_HUMAN | 35789  | 100% | 7  | 8  | 30  | 0.03% | 31.70% |
| DRO-p54 | (P08865) 40S ribosomal protein SA (p40) (34/67 kDa laminin receptor) (Colon carcinoma laminin-binding protein) (NEM/1CHD4) (Multidrug resistance-associated protein MGR1-Ag)                                                  | RSSA_HUMAN  | 32705  | 100% | 5  | 5  | 19  | 0.02% | 32.30% |
| DRO-p54 | (P08962) CD63 antigen (Melanoma-associated antigen ME491) (Lysosome-associated membrane glycoprotein 3) (LAMP-3) (Ocular melanoma-associated antigen) (OMA81H) (Granulophysin) (Tetraspanin-30) (Tspan-30)                    | CD63_HUMAN  | 25487  | 100% | 5  | 5  | 7   | 0.01% | 24.50% |
| DRO-p54 | (P09211) Glutathione S-transferase P (EC 2.5.1.18) (GST class-pi) (GSTP1-1)                                                                                                                                                   | GSTP1_HUMAN | 23208  | 100% | 4  | 4  | 5   | 0.01% | 31.60% |



## Protein Identified Sequence Coverage in DRO-1

|         |                                                                                                                                                                                                                                               |             |        |      |    |    |     |       |        |
|---------|-----------------------------------------------------------------------------------------------------------------------------------------------------------------------------------------------------------------------------------------------|-------------|--------|------|----|----|-----|-------|--------|
| DRO-p54 | (P09382) Galectin-1 (Lectin galactoside-binding soluble 1) (Beta-galactoside-binding lectin L-14-l) (Lactose-binding lectin 1) (S-Lac lectin 1) (Galaptin) (14 kDa lectin) (HPL) (HBL) (Putative MAPK-activating protein MP12)                | LEG1_HUMAN  | 14567  | 100% | 5  | 6  | 34  | 0.04% | 57.50% |
| DRO-p54 | (P09429) High mobility group protein B1 (High mobility group protein 1) (HMG-1)                                                                                                                                                               | HMGB1_HUMAN | 24746  | 100% | 2  | 2  | 5   | 0.01% | 12.10% |
| DRO-p54 | (P09486) SPARC precursor (Secreted protein acidic and rich in cysteine) (Osteonectin) (ON) (Basement-membrane protein 40) (BM-40)                                                                                                             | SPRC_HUMAN  | 34614  | 100% | 6  | 7  | 16  | 0.02% | 39.90% |
| DRO-p54 | (P09661) U2 small nuclear ribonucleoprotein A' (U2 snRNP-A')                                                                                                                                                                                  | RU2A_HUMAN  | 28399  | 100% | 12 | 14 | 84  | 0.09% | 58.40% |
| DRO-p54 | (P09668) Cathepsin H precursor (EC 3.4.22.16) [Contains: Cathepsin H mini chain; Cathepsin H heavy chain; Cathepsin H light chain]                                                                                                            | CATH_HUMAN  | 37360  | 100% | 3  | 3  | 6   | 0.01% | 20.90% |
| DRO-p54 | (P09972) Fructose-bisphosphate aldolase C (EC 4.1.2.13) (Brain-type aldolase)                                                                                                                                                                 | ALDOC_HUMAN | 39307  | 100% | 3  | 3  | 7   | 0.01% | 11.60% |
| DRO-p54 | (P10253) Lysosomal alpha-glucosidase precursor (EC 3.2.1.20) (Acid maltase) (Aglucosidase alfa) [Contains: 76 kDa lysosomal alpha-glucosidase; 70 kDa lysosomal alpha-glucosidase]                                                            | LYAG_HUMAN  | 105321 | 100% | 17 | 20 | 92  | 0.10% | 31.00% |
| DRO-p54 | (P10619) Lysosomal protective protein precursor (EC 3.4.16.5) (Cathepsin A) (Carboxypeptidase C) (Protective protein for beta-galactosidase) [Contains: Lysosomal protective protein 32 kDa chain; Lysosomal protective protein 20 kDa chain] | PPGB_HUMAN  | 54450  | 100% | 7  | 9  | 53  | 0.06% | 24.40% |
| DRO-p54 | (P10809) 60 kDa heat shock protein, mitochondrial precursor (Hsp60) (60 kDa chaperonin) (CPN60) (Heat shock protein 60) (HSP-60) (Mitochondrial matrix protein P1) (P60 lymphocyte protein) (HuCHA60)                                         | CH60_HUMAN  | 61038  | 100% | 2  | 3  | 8   | 0.01% | 8.55%  |
| DRO-p54 | (P10915) Hyaluronan and proteoglycan link protein 1 precursor (Proteoglycan link protein) (Cartilage link protein) (LP)                                                                                                                       | HPLN1_HUMAN | 40148  | 100% | 10 | 14 | 102 | 0.11% | 41.50% |
| DRO-p54 | (P11021) 78 kDa glucose-regulated protein precursor (GRP 78) (Immunoglobulin heavy chain-binding protein) (BiP) (Endoplasmic reticulum lumenal Ca(2+)-binding protein grp78)                                                                  | GRP78_HUMAN | 72317  | 100% | 24 | 31 | 249 | 0.28% | 44.30% |
| DRO-p54 | (P11047) Laminin gamma-1 chain precursor (Laminin B2 chain)                                                                                                                                                                                   | LAMC1_HUMAN | 177587 | 100% | 22 | 23 | 67  | 0.07% | 21.40% |
| DRO-p54 | (P11117) Lysosomal acid phosphatase precursor (EC 3.1.3.2) (LAP)                                                                                                                                                                              | PPAL_HUMAN  | 48299  | 100% | 3  | 3  | 3   | 0.00% | 8.51%  |
| DRO-p54 | (P11142) Heat shock cognate 71 kDa protein (Heat shock 70 kDa protein 8)                                                                                                                                                                      | HSP7C_HUMAN | 70882  | 100% | 8  | 8  | 13  | 0.01% | 23.80% |
| DRO-p54 | (P11216) Glycogen phosphorylase, brain form (EC 2.4.1.1)                                                                                                                                                                                      | PYGB_HUMAN  | 96549  | 100% | 11 | 11 | 44  | 0.05% | 17.90% |
| DRO-p54 | (P11279) Lysosome-associated membrane glycoprotein 1 precursor (LAMP-1) (CD107a antigen)                                                                                                                                                      | LAMP1_HUMAN | 44756  | 100% | 7  | 8  | 17  | 0.02% | 25.50% |

## Protein Identified Sequence Coverage in DRO-1

|         |                                                                                                                                                                                                                                                      |             |        |      |    |    |     |       |        |
|---------|------------------------------------------------------------------------------------------------------------------------------------------------------------------------------------------------------------------------------------------------------|-------------|--------|------|----|----|-----|-------|--------|
| DRO-p54 | (P11586) C-1-tetrahydrofolate synthase, cytoplasmic (C1-THF synthase) [Includes: Methylenetetrahydrofolate dehydrogenase (EC 1.5.1.5); Methylenetetrahydrofolate cyclohydrolase (EC 3.5.4.9); Formyltetrahydrofolate synthetase (EC 6.3.4.3)]        | C1TC_HUMAN  | 101412 | 100% | 2  | 2  | 3   | 0.00% | 2.68%  |
| DRO-p54 | (P11717) Cation-independent mannose-6-phosphate receptor precursor (CI Man-6-P receptor) (CI-MPR) (M6PR) (Insulin-like growth factor 2 receptor) (Insulin-like growth factor II receptor) (IGF-II receptor) (M6P/IGF2 receptor) (M6P/IGF2R) (300 kD) | MPRI_HUMAN  | 274256 | 100% | 2  | 2  | 2   | 0.00% | 1.24%  |
| DRO-p54 | (P12109) Collagen alpha-1(VI) chain precursor                                                                                                                                                                                                        | CO6A1_HUMAN | 108531 | 100% | 8  | 10 | 53  | 0.06% | 12.80% |
| DRO-p54 | (P12236) ADP/ATP translocase 3 (Adenine nucleotide translocator 2) (ANT 3) (ADP,ATP carrier protein 3) (Solute carrier family 25 member 6) (ADP,ATP carrier protein, isoform T2)                                                                     | ADT3_HUMAN  | 32718  | 100% | 2  | 2  | 4   | 0.00% | 7.07%  |
| DRO-p54 | (P12814) Alpha-actinin-1 (Alpha-actinin cytoskeletal isoform) (Non-muscle alpha-actinin-1) (F-actin cross linking protein)                                                                                                                           | ACTN1_HUMAN | 103043 | 100% | 3  | 3  | 3   | 0.00% | 14.70% |
| DRO-p54 | (P13284) Gamma-interferon-inducible lysosomal thiol reductase precursor (Gamma-interferon-inducible protein IP-30)                                                                                                                                   | GILT_HUMAN  | 29131  | 100% | 2  | 2  | 6   | 0.01% | 21.10% |
| DRO-p54 | (P13473) Lysosome-associated membrane glycoprotein 2 precursor (LAMP-2) (CD107b antigen)                                                                                                                                                             | LAMP2_HUMAN | 44943  | 100% | 4  | 4  | 18  | 0.02% | 11.50% |
| DRO-p54 | (P13611) Versican core protein precursor (Large fibroblast proteoglycan) (Chondroitin sulfate proteoglycan core protein 2) (PG-M) (Glial hyaluronate-binding protein) (GHAP)                                                                         | CSPG2_HUMAN | 372795 | 100% | 6  | 6  | 12  | 0.01% | 3.47%  |
| DRO-p54 | (P13639) Elongation factor 2 (EF-2)                                                                                                                                                                                                                  | EF2_HUMAN   | 95191  | 100% | 9  | 10 | 35  | 0.04% | 19.50% |
| DRO-p54 | (P13645) Keratin, type I cytoskeletal 10 (Cytokeratin-10) (CK-10) (Keratin-10) (K10)                                                                                                                                                                 | K1C10_HUMAN | 59502  | 100% | 4  | 4  | 8   | 0.01% | 10.30% |
| DRO-p54 | (P13667) Protein disulfide-isomerase A4 precursor (EC 5.3.4.1) (Protein ERp-72) (ERp72)                                                                                                                                                              | PDIA4_HUMAN | 72916  | 100% | 32 | 38 | 293 | 0.33% | 46.70% |
| DRO-p54 | (P13987) CD59 glycoprotein precursor (Membrane attack complex inhibition factor) (MACIF) (MAC-inhibitory protein) (MAC-IP) (Protectin) (MEM43 antigen) (Membrane inhibitor of reactive lysis) (MIRL) (20 kDa homologous restriction factor) (HRF-20) | CD59_HUMAN  | 14159  | 100% | 5  | 6  | 221 | 0.25% | 37.50% |
| DRO-p54 | (P14174) Macrophage migration inhibitory factor (MIF) (Phenylpyruvate tautomerase) (EC 5.3.2.1) (Glycosylation-inhibiting factor) (GIF)                                                                                                              | MIF_HUMAN   | 12327  | 100% | 2  | 2  | 3   | 0.00% | 17.50% |
| DRO-p54 | (P14314) Glucosidase 2 beta subunit precursor (Glucosidase II beta subunit) (Protein kinase C substrate, 60.1 kDa protein, heavy chain) (PKCSH) (80K-H protein)                                                                                      | GLU2B_HUMAN | 59279  | 100% | 20 | 25 | 249 | 0.28% | 60.90% |
| DRO-p54 | (P14618) Pyruvate kinase isozymes M1/M2 (EC 2.7.1.40) (Pyruvate kinase muscle isozyme) (Cytosolic thyroid hormone-binding protein) (CTHBP) (THBP1)                                                                                                   | KPYM_HUMAN  | 57788  | 100% | 12 | 16 | 68  | 0.08% | 35.70% |

## Protein Identified Sequence Coverage in DRO-1

|         |                                                                                                                                                                                                                                                     |                 |        |      |    |    |     |       |        |
|---------|-----------------------------------------------------------------------------------------------------------------------------------------------------------------------------------------------------------------------------------------------------|-----------------|--------|------|----|----|-----|-------|--------|
| DRO-p54 | (P14625) Endoplasmic precursor (Heat shock protein 90 kDa beta member 1) (94 kDa glucose-regulated protein) (GRP94) (gp96 homolog) (Tumor rejection antigen 1)                                                                                      | ENPL_HUMAN      | 92454  | 100% | 28 | 32 | 172 | 0.19% | 44.80% |
| DRO-p54 | (P14678) Small nuclear ribonucleoprotein-associated proteins B and B' (snRNP-B) (Sm protein B/B') (Sm-B/Sm-B') (Smb/Smb')                                                                                                                           | RSMB_HUMAN,RSI  | 24596  | 100% | 2  | 2  | 11  | 0.01% | 9.58%  |
| DRO-p54 | (P15289) Arylsulfatase A precursor (EC 3.1.6.8) (ASA) (Cerebroside-sulfatase) [Contains: Arylsulfatase A component B; Arylsulfatase A component C]                                                                                                  | ARSA_HUMAN      | 53571  | 100% | 4  | 5  | 26  | 0.03% | 13.40% |
| DRO-p54 | (P15531) Nucleoside diphosphate kinase A (EC 2.7.4.6) (NDK A) (NDP kinase A) (Tumor metastatic process-associated protein) (Metastasis inhibition factor nm23) (nm23-H1) (Granzyme A-activated DNase) (GAAD)                                        | NDKA_HUMAN      | 17131  | 100% | 3  | 4  | 19  | 0.02% | 53.30% |
| DRO-p54 | (P15586) N-acetylglucosamine-6-sulfatase precursor (EC 3.1.6.14) (G6S) (Glucosamine-6-sulfatase)                                                                                                                                                    | GL6S_HUMAN      | 62066  | 100% | 10 | 11 | 42  | 0.05% | 25.50% |
| DRO-p54 | (P15880) 40S ribosomal protein S2 (S4) (LLRep3 protein)                                                                                                                                                                                             | RS2_HUMAN       | 31307  | 100% | 3  | 4  | 13  | 0.01% | 12.30% |
| DRO-p54 | (P16070) CD44 antigen precursor (Phagocytic glycoprotein I) (PGP-1) (HUTCH-I) (Extracellular matrix receptor-III) (ECMR-III) (GP90 lymphocyte homing/adhesion receptor) (Hermes antigen) (Hyaluronate receptor) (Heparan sulfate proteoglycan) (Epi | CD44_HUMAN      | 81535  | 100% | 5  | 6  | 40  | 0.04% | 8.76%  |
| DRO-p54 | (P16112) Aggrecan core protein precursor (Cartilage specific proteoglycan core protein) (CSPCP) (Chondroitin sulfate proteoglycan core protein 1) [Contains: Aggrecan core protein 2]                                                               | PGCA_HUMAN      | 250168 | 100% | 4  | 5  | 15  | 0.02% | 4.39%  |
| DRO-p54 | (P16278) Beta-galactosidase precursor (EC 3.2.1.23) (Lactase) (Acid beta-galactosidase)                                                                                                                                                             | BGAL_HUMAN      | 76076  | 100% | 4  | 4  | 15  | 0.02% | 7.53%  |
| DRO-p54 | (P16403) Histone H1.2 (Histone H1d)                                                                                                                                                                                                                 | H12_HUMAN,H13_f | 21217  | 100% | 4  | 4  | 20  | 0.02% | 15.60% |
| DRO-p54 | (P17050) Alpha-N-acetylgalactosaminidase precursor (EC 3.2.1.49) (Alpha-galactosidase B)                                                                                                                                                            | NAGAB_HUMAN     | 46548  | 100% | 7  | 8  | 28  | 0.03% | 27.50% |
| DRO-p54 | (P17174) Aspartate aminotransferase, cytoplasmic (EC 2.6.1.1) (Transaminase A) (Glutamate oxaloacetate transaminase 1)                                                                                                                              | AATC_HUMAN      | 46099  | 100% | 6  | 6  | 7   | 0.01% | 23.50% |
| DRO-p54 | (P17900) Ganglioside GM2 activator precursor (GM2-AP) (Cerebroside sulfate activator protein) (Shingolipid activator protein 3) (SAP-3) [Contains: Ganglioside GM2 activator isoform short]                                                         | SAP3_HUMAN      | 20805  | 100% | 2  | 3  | 17  | 0.02% | 28.00% |
| DRO-p54 | (P17936) Insulin-like growth factor-binding protein 3 precursor (IGFBP-3) (IBP-3) (IGF-binding protein 3)                                                                                                                                           | IBP3_HUMAN      | 31642  | 100% | 8  | 9  | 34  | 0.04% | 39.90% |
| DRO-p54 | (P18124) 60S ribosomal protein L7                                                                                                                                                                                                                   | RL7_HUMAN       | 29210  | 100% | 4  | 4  | 14  | 0.02% | 21.80% |
| DRO-p54 | (P18621) 60S ribosomal protein L17 (L23)                                                                                                                                                                                                            | RL17_HUMAN      | 21248  | 100% | 2  | 3  | 3   | 0.00% | 16.40% |
| DRO-p54 | (P18669) Phosphoglycerate mutase 1 (EC 5.4.2.1) (EC 5.4.2.4) (EC 3.1.3.13) (Phosphoglycerate mutase isozyme B) (PGAM-B) (BPG-dependent PGAM 1)                                                                                                      | PGAM1_HUMAN     | 28656  | 100% | 2  | 2  | 5   | 0.01% | 16.20% |
| DRO-p54 | (P19338) Nucleolin (Protein C23)                                                                                                                                                                                                                    | NUCL_HUMAN      | 76467  | 100% | 3  | 5  | 20  | 0.02% | 10.90% |

## Protein Identified Sequence Coverage in DRO-1

|         |                                                                                                                                                                                                                                                   |             |        |      |   |   |    |       |        |
|---------|---------------------------------------------------------------------------------------------------------------------------------------------------------------------------------------------------------------------------------------------------|-------------|--------|------|---|---|----|-------|--------|
| DRO-p54 | (P20020) Plasma membrane calcium-transporting ATPase 1 (EC 3.6.3.8) (PMCA1) (Plasma membrane calcium pump isoform 1) (Plasma membrane calcium ATPase isoform 1)                                                                                   | AT2B1_HUMAN | 138741 | 100% | 2 | 2 | 3  | 0.00% | 2.70%  |
| DRO-p54 | (P20618) Proteasome subunit beta type 1 (EC 3.4.25.1) (Proteasome component C5) (Macropain subunit C5) (Multicatalytic endopeptidase complex subunit C5) (Proteasome gamma chain)                                                                 | PSB1_HUMAN  | 26473  | 100% | 3 | 4 | 8  | 0.01% | 23.20% |
| DRO-p54 | (P20933) N(4)-(beta-N-acetylglucosaminy)-L-asparaginase precursor (EC 3.5.1.26) (Glycosylasparaginase) (Aspartylglucosaminidase) (N4-(N-acetyl-beta-glucosaminy)-L-asparagine amidase) (AGA) [Contains: Glycosylasparaginase alpha chain; Glycosy | ASPG_HUMAN  | 37176  | 100% | 2 | 2 | 7  | 0.01% | 17.10% |
| DRO-p54 | (P21291) Cysteine and glycine-rich protein 1 (Cysteine-rich protein 1) (CRP1) (CRP)                                                                                                                                                               | CSRP1_HUMAN | 20418  | 100% | 3 | 4 | 5  | 0.01% | 25.50% |
| DRO-p54 | (P21333) Filamin-A (Alpha-filamin) (Filamin-1) (Endothelial actin-binding protein) (Actin-binding protein 280) (ABP-280) (Nonmuscle filamin)                                                                                                      | FLNA_HUMAN  | 280602 | 100% | 3 | 3 | 3  | 0.00% | 2.68%  |
| DRO-p54 | (P21589) 5'-nucleotidase precursor (EC 3.1.3.5) (Ecto-5'-nucleotidase) (5'-NT) (CD73 antigen)                                                                                                                                                     | 5NTD_HUMAN  | 63351  | 100% | 5 | 5 | 6  | 0.01% | 16.20% |
| DRO-p54 | (P21796) Voltage-dependent anion-selective channel protein 1 (VDAC-1) (hVDAC1) (Outer mitochondrial membrane protein porin 1) (Plasmalemmal porin) (Porin 31HL) (Porin 31HM)                                                                      | VDAC1_HUMAN | 30625  | 100% | 2 | 2 | 4  | 0.00% | 12.10% |
| DRO-p54 | (P22061) Protein-L-isoaspartate(D-aspartate) O-methyltransferase (EC 2.1.1.77) (Protein-beta-aspartate methyltransferase) (PIMT) (Protein L-isoaspartyl/D-aspartyl methyltransferase) (L-isoaspartyl protein carboxyl methyltransferase)          | PIMT_HUMAN  | 24502  | 100% | 2 | 3 | 5  | 0.01% | 23.50% |
| DRO-p54 | (P22234) Multifunctional protein ADE2 [Includes: Phosphoribosylaminoimidazole-succinocarboxamide synthase (EC 6.3.2.6) (SAICAR synthetase); Phosphoribosylaminoimidazole carboxylase (EC 4.1.1.21) (AIR carboxylase) (AIRC)]                      | PUR6_HUMAN  | 46931  | 100% | 4 | 4 | 11 | 0.01% | 17.20% |
| DRO-p54 | (P22307) Nonspecific lipid-transfer protein (EC 2.3.1.176) (Propanoyl-CoA C-acyltransferase) (NSLTP) (Sterol carrier protein 2) (SCP-2) (Sterol carrier protein X) (SCP-X) (SCP-chi) (SCPX)                                                       | NLTP_HUMAN  | 58977  | 100% | 2 | 2 | 2  | 0.00% | 3.66%  |
| DRO-p54 | (P22314) Ubiquitin-activating enzyme E1 (A1S9 protein)                                                                                                                                                                                            | UBE1_HUMAN  | 117832 | 100% | 3 | 3 | 5  | 0.01% | 5.39%  |
| DRO-p54 | (P22392) Nucleoside diphosphate kinase B (EC 2.7.4.6) (NDK B) (NDP kinase B) (nm23-H2) (C-myc purine-binding transcription factor PUF)                                                                                                            | NDKB_HUMAN  | 17280  | 100% | 6 | 7 | 32 | 0.04% | 60.50% |
| DRO-p54 | (P22626) Heterogeneous nuclear ribonucleoproteins A2/B1 (hnRNP A2 / hnRNP B1)                                                                                                                                                                     | ROA2_HUMAN  | 37412  | 100% | 5 | 5 | 17 | 0.02% | 18.70% |
| DRO-p54 | (P23284) Peptidyl-prolyl cis-trans isomerase B precursor (EC 5.2.1.8) (PPIase) (Rotamase) (Cyclophilin B) (S-cyclophilin) (SCYLP) (CYP-S1)                                                                                                        | PPIB_HUMAN  | 22725  | 100% | 7 | 7 | 33 | 0.04% | 28.80% |
| DRO-p54 | (P23396) 40S ribosomal protein S3                                                                                                                                                                                                                 | RS3_HUMAN   | 26671  | 100% | 4 | 4 | 7  | 0.01% | 21.40% |

## Protein Identified Sequence Coverage in DRO-1

|         |                                                                                                                                                                                                                                                      |             |        |      |    |    |     |       |        |
|---------|------------------------------------------------------------------------------------------------------------------------------------------------------------------------------------------------------------------------------------------------------|-------------|--------|------|----|----|-----|-------|--------|
| DRO-p54 | (P23528) Cofilin-1 (Cofilin, non-muscle isoform) (18 kDa phosphoprotein) (p18)                                                                                                                                                                       | COF1_HUMAN  | 18354  | 100% | 2  | 3  | 8   | 0.01% | 25.50% |
| DRO-p54 | (P24821) Tenascin precursor (TN) (Hexabrachion) (Cytotactin) (Neuronectin) (GMEM) (JI) (Miotendinous antigen) (Glioma-associated-extracellular matrix antigen) (GP 150-225) (Tenascin-C) (TN-C)                                                      | TENA_HUMAN  | 240845 | 100% | 26 | 31 | 82  | 0.09% | 18.80% |
| DRO-p54 | (P25705) ATP synthase alpha chain, mitochondrial precursor (EC 3.6.3.14)                                                                                                                                                                             | ATPA_HUMAN  | 59734  | 100% | 4  | 4  | 6   | 0.01% | 10.80% |
| DRO-p54 | (P26038) Moesin (Membrane-organizing extension spike protein)                                                                                                                                                                                        | MOES_HUMAN  | 67673  | 100% | 3  | 3  | 7   | 0.01% | 5.90%  |
| DRO-p54 | (P26373) 60S ribosomal protein L13 (Breast basic conserved protein 1)                                                                                                                                                                                | RL13_HUMAN  | 24113  | 100% | 2  | 2  | 9   | 0.01% | 11.00% |
| DRO-p54 | (P26640) Valyl-tRNA synthetase (EC 6.1.1.9) (Valine-tRNA ligase) (ValRS) (Protein G7a)                                                                                                                                                               | SYV_HUMAN   | 140460 | 100% | 2  | 2  | 2   | 0.00% | 2.85%  |
| DRO-p54 | (P26641) Elongation factor 1-gamma (EF-1-gamma) (eEF-1B gamma)                                                                                                                                                                                       | EF1G_HUMAN  | 49970  | 100% | 6  | 6  | 11  | 0.01% | 19.30% |
| DRO-p54 | (P26885) FK506-binding protein 2 precursor (EC 5.2.1.8) (Peptidyl-prolyl cis-trans isomerase) (PPIase) (Rotamase) (13 kDa FKBP) (FKBP-13)                                                                                                            | FKBP2_HUMAN | 15632  | 100% | 2  | 2  | 7   | 0.01% | 30.30% |
| DRO-p54 | (P27105) Erythrocyte band 7 integral membrane protein (Stomatin) (Protein 7.2b)                                                                                                                                                                      | STOM_HUMAN  | 31583  | 100% | 4  | 5  | 17  | 0.02% | 29.60% |
| DRO-p54 | (P27348) 14-3-3 protein theta (14-3-3 protein tau) (14-3-3 protein T-cell) (HS1 protein)                                                                                                                                                             | 1433T_HUMAN | 27747  | 100% | 2  | 2  | 3   | 0.00% | 19.60% |
| DRO-p54 | (P27695) DNA-(apurinic or apyrimidinic site) lyase (EC 4.2.99.18) (AP endonuclease 1) (APEX nuclease) (APEN) (REF-1 protein)                                                                                                                         | APEX1_HUMAN | 35407  | 100% | 2  | 2  | 8   | 0.01% | 8.52%  |
| DRO-p54 | (P27708) CAD protein [Includes: Glutamine-dependent carbamoyl-phosphate synthase (EC 6.3.5.5); Aspartate carbamoyltransferase (EC 2.1.3.2); Dihydroorotase (EC 3.5.2.3)]                                                                             | PYR1_HUMAN  | 242965 | 100% | 2  | 2  | 3   | 0.00% | 1.89%  |
| DRO-p54 | (P27797) Calreticulin precursor (CRP55) (Calregulin) (HACBP) (ERp60) (grp60)                                                                                                                                                                         | CRTC_HUMAN  | 48125  | 100% | 11 | 14 | 104 | 0.12% | 47.20% |
| DRO-p54 | (P27824) Calnexin precursor (Major histocompatibility complex class I antigen-binding protein p88) (p90) (IP90)                                                                                                                                      | CALX_HUMAN  | 67552  | 100% | 3  | 4  | 22  | 0.02% | 6.93%  |
| DRO-p54 | (P28799) Granulins precursor (Proepithelin) (PEPI) [Contains: Acrogranin; Paragranulin; Granulin-1 (Granulin G); Granulin-2 (Granulin F); Granulin-3 (Granulin B); Granulin-4 (Granulin A); Granulin-5 (Granulin C); Granulin-6 (Granulin D); Granul | GRN_HUMAN   | 63522  | 100% | 3  | 3  | 4   | 0.00% | 9.95%  |
| DRO-p54 | (P29401) Transketolase (EC 2.2.1.1) (TK)                                                                                                                                                                                                             | TKT_HUMAN   | 67861  | 100% | 12 | 14 | 68  | 0.08% | 39.00% |
| DRO-p54 | (P30040) Endoplasmic reticulum protein ERp29 precursor (ERp31) (ERp28)                                                                                                                                                                               | ERP29_HUMAN | 28977  | 100% | 6  | 7  | 64  | 0.07% | 40.60% |
| DRO-p54 | (P30041) Peroxiredoxin-6 (EC 1.11.1.15) (Antioxidant protein 2) (1-Cys peroxiredoxin) (1-Cys PRX) (Acidic calcium-independent phospholipase A2) (EC 3.1.1.-) (aiPLA2) (Non-selenium glutathione peroxidase) (EC 1.11.1.7) (NSGPx) (24 kDa protein)   | PRDX6_HUMAN | 24887  | 100% | 9  | 10 | 76  | 0.08% | 48.40% |

## Protein Identified Sequence Coverage in DRO-1

|         |                                                                                                                                                                                                                                                    |                 |        |      |    |    |    |       |        |
|---------|----------------------------------------------------------------------------------------------------------------------------------------------------------------------------------------------------------------------------------------------------|-----------------|--------|------|----|----|----|-------|--------|
| DRO-p54 | (P30044) Peroxiredoxin-5, mitochondrial precursor (EC 1.11.1.15) (Prx-V) (Peroxisomal antioxidant enzyme) (PLP) (Thioredoxin reductase) (Thioredoxin peroxidase PMP20) (Antioxidant enzyme B166) (AOEB166) (TPx type VI) (Liver tissue 2D-page spo | PRDX5_HUMAN     | 22008  | 100% | 2  | 2  | 2  | 0.00% | 18.70% |
| DRO-p54 | (P30050) 60S ribosomal protein L12                                                                                                                                                                                                                 | RL12_HUMAN      | 17801  | 100% | 5  | 6  | 52 | 0.06% | 45.50% |
| DRO-p54 | (P30101) Protein disulfide-isomerase A3 precursor (EC 5.3.4.1) (Disulfide isomerase ER-60) (ERp60) (58 kDa microsomal protein) (p58) (ERp57) (58 kDa glucose-regulated protein)                                                                    | PDIA3_HUMAN     | 56767  | 100% | 15 | 16 | 66 | 0.07% | 35.00% |
| DRO-p54 | (P30464) HLA class I histocompatibility antigen, B-15 alpha chain precursor (MHC class I antigen B*15)                                                                                                                                             | 1B15_HUMAN,1B35 | 40548  | 100% | 3  | 3  | 7  | 0.01% | 11.00% |
| DRO-p54 | (P30533) Alpha-2-macroglobulin receptor-associated protein precursor (Alpha-2-MRAP) (Low density lipoprotein receptor-related protein-associated protein 1) (RAP)                                                                                  | AMRP_HUMAN      | 41450  | 100% | 2  | 2  | 3  | 0.00% | 6.16%  |
| DRO-p54 | (P31943) Heterogeneous nuclear ribonucleoprotein H (hnRNP H)                                                                                                                                                                                       | HNRH1_HUMAN     | 49081  | 100% | 2  | 2  | 4  | 0.00% | 11.80% |
| DRO-p54 | (P31948) Stress-induced-phosphoprotein 1 (STI1) (Hsc70/Hsp90-organizing protein) (Hop) (Transformation-sensitive protein IEF SSP 3521) (NY-REN-11 antigen)                                                                                         | STIP1_HUMAN     | 62624  | 100% | 2  | 2  | 3  | 0.00% | 5.34%  |
| DRO-p54 | (P32119) Peroxiredoxin-2 (EC 1.11.1.15) (Thioredoxin peroxidase 1) (Thioredoxin-dependent peroxide reductase 1) (Thiol-specific antioxidant protein) (TSA) (PRP) (Natural killer cell-enhancing factor B) (NKEF-B)                                 | PRDX2_HUMAN     | 21743  | 100% | 3  | 3  | 13 | 0.01% | 14.70% |
| DRO-p54 | (P33121) Long-chain-fatty-acid--CoA ligase 1 (EC 6.2.1.3) (Long-chain acyl-CoA synthetase 1) (LACS 1) (Palmitoyl-CoA ligase 1) (Long-chain fatty acid CoA ligase 2) (Long-chain acyl-CoA synthetase 2) (LACS 2) (Acyl-CoA synthetase 1) (ACS1) (Pa | ACSL1_HUMAN     | 77927  | 100% | 2  | 2  | 3  | 0.00% | 3.01%  |
| DRO-p54 | (P34059) N-acetylgalactosamine-6-sulfatase precursor (EC 3.1.6.4) (N-acetylgalactosamine-6-sulfate sulfatase) (Galactose-6-sulfate sulfatase) (GalNAc6S sulfatase) (Chondroitinsulfatase) (Chondroitinase)                                         | GA6S_HUMAN      | 58009  | 100% | 3  | 3  | 9  | 0.01% | 9.58%  |
| DRO-p54 | (P35052) Glypican-1 precursor                                                                                                                                                                                                                      | GPC1_HUMAN      | 61633  | 100% | 6  | 6  | 7  | 0.01% | 19.70% |
| DRO-p54 | (P35527) Keratin, type I cytoskeletal 9 (Cytokeratin-9) (CK-9) (Keratin-9) (K9)                                                                                                                                                                    | K1C9_HUMAN      | 62113  | 100% | 6  | 8  | 17 | 0.02% | 28.10% |
| DRO-p54 | (P35579) Myosin-9 (Myosin heavy chain, nonmuscle IIa) (Nonmuscle myosin heavy chain IIa) (NMMHC II-a) (NMMHC-IIA) (Cellular myosin heavy chain, type A) (Nonmuscle myosin heavy chain-A) (NMMHC-A)                                                 | MYH9_HUMAN      | 226388 | 100% | 4  | 4  | 4  | 0.00% | 4.44%  |
| DRO-p54 | (P35580) Myosin-10 (Myosin heavy chain, nonmuscle IIb) (Nonmuscle myosin heavy chain IIb) (NMMHC II-b) (NMMHC-IIB) (Cellular myosin heavy chain, type B) (Nonmuscle myosin heavy chain-B) (NMMHC-B)                                                | MYH10_HUMAN     | 228927 | 100% | 2  | 2  | 2  | 0.00% | 1.97%  |

## Protein Identified Sequence Coverage in DRO-1

|         |                                                                                                                                                                                                                                                    |             |        |      |    |    |    |       |        |
|---------|----------------------------------------------------------------------------------------------------------------------------------------------------------------------------------------------------------------------------------------------------|-------------|--------|------|----|----|----|-------|--------|
| DRO-p54 | (P35613) Basigin precursor (Leukocyte activation antigen M6) (Collagenase stimulatory factor) (Extracellular matrix metalloproteinase inducer) (EMMPRIN) (5F7) (Tumor cell-derived collagenase stimulatory factor) (TCSF) (OK blood group antigen) | BASI_HUMAN  | 42182  | 100% | 9  | 10 | 22 | 0.02% | 37.90% |
| DRO-p54 | (P35908) Keratin, type II cytoskeletal 2 epidermal (Cytokeratin-2e) (K2e) (CK 2e)                                                                                                                                                                  | K22E_HUMAN  | 65848  | 100% | 2  | 2  | 2  | 0.00% | 9.77%  |
| DRO-p54 | (P36578) 60S ribosomal protein L4 (L1)                                                                                                                                                                                                             | RL4_HUMAN   | 47550  | 100% | 11 | 13 | 55 | 0.06% | 33.80% |
| DRO-p54 | (P37108) Signal recognition particle 14 kDa protein (SRP14) (18 kDa Alu RNA-binding protein)                                                                                                                                                       | SRP14_HUMAN | 14527  | 100% | 3  | 3  | 4  | 0.00% | 39.00% |
| DRO-p54 | (P37802) Transgelin-2 (SM22-alpha homolog)                                                                                                                                                                                                         | TAGL2_HUMAN | 22243  | 100% | 3  | 3  | 9  | 0.01% | 27.80% |
| DRO-p54 | (P37837) Transaldolase (EC 2.2.1.2)                                                                                                                                                                                                                | TALDO_HUMAN | 37524  | 100% | 5  | 5  | 23 | 0.03% | 19.30% |
| DRO-p54 | (P38646) Stress-70 protein, mitochondrial precursor (75 kDa glucose-regulated protein) (GRP 75) (Peptide-binding protein 74) (PBP74) (Mortalin) (MOT)                                                                                              | GRP75_HUMAN | 73663  | 100% | 2  | 2  | 3  | 0.00% | 3.83%  |
| DRO-p54 | (P39019) 40S ribosomal protein S19                                                                                                                                                                                                                 | RS19_HUMAN  | 15911  | 100% | 2  | 2  | 6  | 0.01% | 15.30% |
| DRO-p54 | (P39023) 60S ribosomal protein L3 (HIV-1 TAR RNA binding protein B) (TARBP-B)                                                                                                                                                                      | RL3_HUMAN   | 45960  | 100% | 2  | 2  | 6  | 0.01% | 11.90% |
| DRO-p54 | (P39656) Dolichyl-diphosphooligosaccharide--protein glycosyltransferase 48 kDa subunit precursor (EC 2.4.1.119) (Oligosaccharyl transferase 48 kDa subunit) (DDOST 48 kDa subunit)                                                                 | OST48_HUMAN | 48793  | 100% | 2  | 2  | 2  | 0.00% | 5.47%  |
| DRO-p54 | (P40926) Malate dehydrogenase, mitochondrial precursor (EC 1.1.1.37)                                                                                                                                                                               | MDHM_HUMAN  | 35514  | 100% | 3  | 3  | 6  | 0.01% | 15.40% |
| DRO-p54 | (P41252) Isoleucyl-tRNA synthetase, cytoplasmic (EC 6.1.1.5) (Isoleucine--tRNA ligase) (IleRS) (IRS)                                                                                                                                               | SYIC_HUMAN  | 144944 | 100% | 2  | 2  | 2  | 0.00% | 2.21%  |
| DRO-p54 | (P42167) Lamina-associated polypeptide 2, isoforms beta/gamma (Thymopoietin, isoforms beta/gamma) (TP beta/gamma) (Thymopoietin-related peptide isoforms beta/gamma) (TPRP isoforms beta/gamma) [Contains: Thymopoietin (TP) (Splenin); Thymopenti | LAP2B_HUMAN | 50522  | 100% | 2  | 2  | 4  | 0.00% | 6.40%  |
| DRO-p54 | (P43121) Cell surface glycoprotein MUC18 precursor (Melanoma-associated antigen MUC18) (Melanoma cell adhesion molecule) (Melanoma-associated antigen A32) (S-endo 1 endothelial-associated antigen) (Cell surface glycoprotein P1H12) (CD146 anti | MUC18_HUMAN | 71589  | 100% | 13 | 14 | 52 | 0.06% | 33.90% |
| DRO-p54 | (P43243) Matrin-3                                                                                                                                                                                                                                  | MATR3_HUMAN | 94609  | 100% | 2  | 2  | 2  | 0.00% | 7.79%  |
| DRO-p54 | (P43307) Translocon-associated protein alpha subunit precursor (TRAP-alpha) (Signal sequence receptor alpha subunit) (SSR-alpha)                                                                                                                   | SSRA_HUMAN  | 32218  | 100% | 3  | 4  | 13 | 0.01% | 23.10% |
| DRO-p54 | (P43358) Melanoma-associated antigen 4 (MAGE-4 antigen) (MAGE-X2) (MAGE-41)                                                                                                                                                                        | MAGA4_HUMAN | 34911  | 100% | 3  | 3  | 6  | 0.01% | 12.30% |
| DRO-p54 | (P43490) Nicotinamide phosphoribosyltransferase (EC 2.4.2.12) (NAmPRTase) (Nampt) (Pre-B cell-enhancing factor) (Pre-B-cell colony-enhancing factor 1) (Visfatin)                                                                                  | NAMPT_HUMAN | 55505  | 100% | 6  | 8  | 26 | 0.03% | 27.10% |
| DRO-p54 | (P46777) 60S ribosomal protein L5                                                                                                                                                                                                                  | RL5_HUMAN   | 34214  | 100% | 2  | 2  | 3  | 0.00% | 10.80% |

## Protein Identified Sequence Coverage in DRO-1

|         |                                                                                                                                                                                                                                                     |              |        |      |    |    |    |       |        |
|---------|-----------------------------------------------------------------------------------------------------------------------------------------------------------------------------------------------------------------------------------------------------|--------------|--------|------|----|----|----|-------|--------|
| DRO-p54 | (P46778) 60S ribosomal protein L21                                                                                                                                                                                                                  | RL21_HUMAN   | 18416  | 100% | 3  | 4  | 18 | 0.02% | 27.70% |
| DRO-p54 | (P46782) 40S ribosomal protein S5                                                                                                                                                                                                                   | RS5_HUMAN    | 22728  | 100% | 3  | 4  | 15 | 0.02% | 18.20% |
| DRO-p54 | (P46783) 40S ribosomal protein S10                                                                                                                                                                                                                  | RS10_HUMAN   | 18880  | 100% | 2  | 2  | 4  | 0.00% | 13.90% |
| DRO-p54 | (P46940) Ras GTPase-activating-like protein IQGAP1 (p195)                                                                                                                                                                                           | IQGAP1_HUMAN | 189241 | 100% | 8  | 8  | 11 | 0.01% | 9.29%  |
| DRO-p54 | (P48643) T-complex protein 1 subunit epsilon (TCP-1-epsilon) (CCT-epsilon)                                                                                                                                                                          | TCPE_HUMAN   | 59654  | 100% | 2  | 2  | 3  | 0.00% | 6.65%  |
| DRO-p54 | (P48960) CD97 antigen precursor (Leukocyte antigen CD97)                                                                                                                                                                                            | CD97_HUMAN   | 91852  | 100% | 2  | 2  | 2  | 0.00% | 3.71%  |
| DRO-p54 | (P49006) MARCKS-related protein (MARCKS-like protein 1) (Macrophage myristoylated alanine-rich C kinase substrate) (Mac-MARCKS) (MacMARCKS)                                                                                                         | MRP_HUMAN    | 19379  | 100% | 2  | 2  | 2  | 0.00% | 37.10% |
| DRO-p54 | (P49327) Fatty acid synthase (EC 2.3.1.85) [Includes: [Acyl-carrier-protein] S-acetyltransferase (EC 2.3.1.38); [Acyl-carrier-protein] S-malonyltransferase (EC 2.3.1.39); 3-oxoacyl-[acyl-carrier-protein] synthase (EC 2.3.1.41); 3-oxoacyl-acyl- | FAS_HUMAN    | 273382 | 100% | 12 | 12 | 24 | 0.03% | 8.36%  |
| DRO-p54 | (P49366) Deoxyhypusine synthase (EC 2.5.1.46) (DHS)                                                                                                                                                                                                 | DHYS_HUMAN   | 40953  | 100% | 2  | 3  | 7  | 0.01% | 8.94%  |
| DRO-p54 | (P50443) Sulfate transporter (Diastrophic dysplasia protein) (Solute carrier family 26 member 2)                                                                                                                                                    | S26A2_HUMAN  | 81634  | 100% | 2  | 3  | 7  | 0.01% | 3.92%  |
| DRO-p54 | (P50897) Palmitoyl-protein thioesterase 1 precursor (EC 3.1.2.22) (Palmitoyl-protein hydrolase 1)                                                                                                                                                   | PPT1_HUMAN   | 34176  | 100% | 9  | 12 | 45 | 0.05% | 43.10% |
| DRO-p54 | (P50914) 60S ribosomal protein L14 (CAG-ISL 7)                                                                                                                                                                                                      | RL14_HUMAN   | 23141  | 100% | 2  | 2  | 10 | 0.01% | 11.30% |
| DRO-p54 | (P51149) Ras-related protein Rab-7                                                                                                                                                                                                                  | RAB7_HUMAN   | 23472  | 100% | 2  | 2  | 3  | 0.00% | 11.60% |
| DRO-p54 | (P51610) Host cell factor (HCF) (HCF-1) (C1 factor) (VP16 accessory protein) (VCAF) (CFF) [Contains: HCF N-terminal chain 1; HCF N-terminal chain 2; HCF N-terminal chain 3; HCF N-terminal chain 4; HCF N-terminal chain 5; HCF N-terminal chain   | HCFC1_HUMAN  | 208816 | 100% | 2  | 2  | 2  | 0.00% | 1.62%  |
| DRO-p54 | (P52272) Heterogeneous nuclear ribonucleoprotein M (hnRNP M)                                                                                                                                                                                        | HNRPM_HUMAN  | 77368  | 100% | 3  | 4  | 7  | 0.01% | 6.86%  |
| DRO-p54 | (P52597) Heterogeneous nuclear ribonucleoprotein F (hnRNP F) (Nucleolin-like protein mcs94-1)                                                                                                                                                       | HNRPF_HUMAN  | 45523  | 100% | 2  | 3  | 8  | 0.01% | 15.90% |
| DRO-p54 | (P53367) Arfaptin-1 (ADP-ribosylation factor-interacting protein 1)                                                                                                                                                                                 | ARFP1_HUMAN  | 41722  | 100% | 2  | 2  | 2  | 0.00% | 11.00% |
| DRO-p54 | (P53634) Dipeptidyl-peptidase 1 precursor (EC 3.4.14.1) (Dipeptidyl-peptidase I) (DPP-I) (DPPI) (Cathepsin C) (Cathepsin J) (Dipeptidyl transferase) [Contains: Dipeptidyl-peptidase 1 exclusion domain chain (Dipeptidyl-peptidase I exclusion dom | CATC_HUMAN   | 51824  | 100% | 2  | 3  | 7  | 0.01% | 9.07%  |
| DRO-p54 | (P54577) Tyrosyl-tRNA synthetase, cytoplasmic (EC 6.1.1.1) (Tyrosyl--tRNA ligase) (TyrRS)                                                                                                                                                           | SYYC_HUMAN   | 58996  | 100% | 3  | 3  | 9  | 0.01% | 8.35%  |
| DRO-p54 | (P54709) Sodium/potassium-transporting ATPase subunit beta-3 (Sodium/potassium-dependent ATPase beta-3 subunit) (ATPB-3) (CD298 antigen)                                                                                                            | AT1B3_HUMAN  | 31496  | 100% | 4  | 4  | 7  | 0.01% | 26.20% |



## Protein Identified Sequence Coverage in DRO-1

|         |                                                                                                                                             |                |        |      |    |    |     |       |        |
|---------|---------------------------------------------------------------------------------------------------------------------------------------------|----------------|--------|------|----|----|-----|-------|--------|
| DRO-p54 | (P54727) UV excision repair protein RAD23 homolog B (hHR23B) (XP-C repair-complementing complex 58 kDa protein) (p58)                       | RD23B_HUMAN    | 43153  | 100% | 2  | 2  | 5   | 0.01% | 12.20% |
| DRO-p54 | (P55060) Exportin-2 (Exp2) (Importin-alpha re-exporter) (Chromosome segregation 1-like protein) (Cellular apoptosis susceptibility protein) | XPO2_HUMAN     | 110404 | 100% | 2  | 2  | 2   | 0.00% | 3.91%  |
| DRO-p54 | (P55145) ARMET protein precursor (Arginine-rich protein)                                                                                    | ARMET_HUMAN    | 20240  | 100% | 6  | 8  | 72  | 0.08% | 36.90% |
| DRO-p54 | (P55327) Tumor protein D52 (N8 protein)                                                                                                     | TPD52_HUMAN    | 19845  | 100% | 11 | 15 | 203 | 0.23% | 80.40% |
| DRO-p54 | (P55769) NHP2-like protein 1 (High mobility group-like nuclear protein 2 homolog 1) (U4/U6.U5 tri-snRNP 15.5 kDa protein) (OTK27) (hSNU13)  | NHPX_HUMAN     | 14025  | 100% | 2  | 2  | 3   | 0.00% | 31.50% |
| DRO-p54 | (P56537) Eukaryotic translation initiation factor 6 (eIF-6) (B4 integrin interactor) (CAB) (p27(BBP)) (B(2)GCN homolog)                     | IF6_HUMAN      | 26580  | 100% | 2  | 3  | 5   | 0.01% | 17.10% |
| DRO-p54 | (P60174) Triosephosphate isomerase (EC 5.3.1.1) (TIM) (Triose-phosphate isomerase)                                                          | TPIS_HUMAN     | 26520  | 100% | 6  | 6  | 25  | 0.03% | 39.10% |
| DRO-p54 | (P60709) Actin, cytoplasmic 1 (Beta-actin)                                                                                                  | ACTB_HUMAN,ACT | 41776  | 100% | 8  | 10 | 42  | 0.05% | 34.40% |
| DRO-p54 | (P60866) 40S ribosomal protein S20                                                                                                          | RS20_HUMAN     | 13355  | 100% | 2  | 2  | 6   | 0.01% | 19.30% |
| DRO-p54 | (P61247) 40S ribosomal protein S3a                                                                                                          | RS3A_HUMAN     | 29796  | 100% | 2  | 2  | 12  | 0.01% | 9.51%  |
| DRO-p54 | (P61353) 60S ribosomal protein L27                                                                                                          | RL27_HUMAN     | 15649  | 100% | 3  | 3  | 4   | 0.00% | 20.70% |
| DRO-p54 | (P61803) Defender against cell death 1 (DAD-1)                                                                                              | DAD1_HUMAN     | 12348  | 100% | 2  | 2  | 2   | 0.00% | 19.60% |
| DRO-p54 | (P61916) Epididymal secretory protein E1 precursor (Niemann-Pick disease type C2 protein) (hE1)                                             | NPC2_HUMAN     | 16552  | 100% | 3  | 3  | 18  | 0.02% | 37.10% |
| DRO-p54 | (P61978) Heterogeneous nuclear ribonucleoprotein K (hnRNP K) (Transformation up-regulated nuclear protein) (TUNP)                           | HNRPK_HUMAN    | 50961  | 100% | 6  | 7  | 18  | 0.02% | 26.60% |
| DRO-p54 | (P61981) 14-3-3 protein gamma (Protein kinase C inhibitor protein 1) (KCIP-1)                                                               | 1433G_HUMAN    | 28154  | 100% | 2  | 2  | 2   | 0.00% | 11.80% |
| DRO-p54 | (P62081) 40S ribosomal protein S7                                                                                                           | RS7_HUMAN      | 22110  | 100% | 3  | 4  | 11  | 0.01% | 32.50% |
| DRO-p54 | (P62241) 40S ribosomal protein S8                                                                                                           | RS8_HUMAN      | 24057  | 100% | 3  | 3  | 3   | 0.00% | 16.90% |
| DRO-p54 | (P62249) 40S ribosomal protein S16                                                                                                          | RS16_HUMAN     | 16297  | 100% | 2  | 2  | 5   | 0.01% | 14.50% |
| DRO-p54 | (P62258) 14-3-3 protein epsilon (14-3-3E)                                                                                                   | 1433E_HUMAN    | 29157  | 100% | 4  | 5  | 19  | 0.02% | 16.50% |
| DRO-p54 | (P62263) 40S ribosomal protein S14                                                                                                          | RS14_HUMAN     | 16124  | 100% | 2  | 2  | 2   | 0.00% | 22.70% |
| DRO-p54 | (P62269) 40S ribosomal protein S18 (Ke-3) (Ke3)                                                                                             | RS18_HUMAN     | 17701  | 100% | 3  | 3  | 9   | 0.01% | 17.10% |
| DRO-p54 | (P62277) 40S ribosomal protein S13                                                                                                          | RS13_HUMAN     | 17074  | 100% | 5  | 5  | 31  | 0.03% | 34.00% |
| DRO-p54 | (P62314) Small nuclear ribonucleoprotein Sm D1 (snRNP core protein D1) (Sm-D1) (Sm-D autoantigen)                                           | SMD1_HUMAN     | 13264  | 100% | 2  | 3  | 8   | 0.01% | 27.70% |
| DRO-p54 | (P62424) 60S ribosomal protein L7a (Surfeit locus protein 3) (PLA-X polypeptide)                                                            | RL7A_HUMAN     | 29847  | 100% | 7  | 9  | 38  | 0.04% | 29.80% |
| DRO-p54 | (P62701) 40S ribosomal protein S4, X isoform (Single copy abundant mRNA protein) (SCR10)                                                    | RS4X_HUMAN     | 29450  | 100% | 2  | 2  | 3   | 0.00% | 11.50% |
| DRO-p54 | (P62805) Histone H4                                                                                                                         | H4_HUMAN       | 11219  | 100% | 10 | 12 | 247 | 0.28% | 57.80% |
| DRO-p54 | (P62807) Histone H2B.a/g/h/k/l (H2B.1 A) (H2B/a) (H2B/g) (H2B/h) (H2B/k) (H2B/l)                                                            | H2BA_HUMAN,H2B | 13743  | 100% | 5  | 6  | 749 | 0.84% | 38.40% |
| DRO-p54 | (P62820) Ras-related protein Rab-1A (YPT1-related protein)                                                                                  | RAB1A_HUMAN    | 22529  | 100% | 2  | 2  | 7   | 0.01% | 13.20% |
| DRO-p54 | (P62847) 40S ribosomal protein S24                                                                                                          | RS24_HUMAN     | 15406  | 100% | 2  | 2  | 14  | 0.02% | 20.30% |
| DRO-p54 | (P62851) 40S ribosomal protein S25                                                                                                          | RS25_HUMAN     | 13725  | 100% | 2  | 2  | 4   | 0.00% | 16.00% |
| DRO-p54 | (P62854) 40S ribosomal protein S26                                                                                                          | RS26_HUMAN     | 12866  | 100% | 3  | 3  | 29  | 0.03% | 31.60% |
| DRO-p54 | (P62888) 60S ribosomal protein L30                                                                                                          | RL30_HUMAN     | 12636  | 100% | 2  | 3  | 15  | 0.02% | 24.60% |

## Protein Identified Sequence Coverage in DRO-1

|         |                                                                                                                                                                                                                                                     |                |        |      |    |    |     |       |        |
|---------|-----------------------------------------------------------------------------------------------------------------------------------------------------------------------------------------------------------------------------------------------------|----------------|--------|------|----|----|-----|-------|--------|
| DRO-p54 | (P62899) 60S ribosomal protein L31                                                                                                                                                                                                                  | RL31_HUMAN     | 14445  | 100% | 2  | 2  | 3   | 0.00% | 18.40% |
| DRO-p54 | (P62906) 60S ribosomal protein L10a (CSA-19)                                                                                                                                                                                                        | RL10A_HUMAN    | 24683  | 100% | 3  | 3  | 8   | 0.01% | 21.80% |
| DRO-p54 | (P62937) Peptidyl-prolyl cis-trans isomerase A (EC 5.2.1.8) (PPIase A) (Rotamase A) (Cyclophilin A) (Cyclosporin A-binding protein)                                                                                                                 | PPIA_HUMAN     | 17864  | 100% | 8  | 10 | 76  | 0.08% | 59.10% |
| DRO-p54 | (P62988) Ubiquitin                                                                                                                                                                                                                                  | UBIQ_HUMAN     | 8547   | 100% | 4  | 4  | 17  | 0.02% | 52.60% |
| DRO-p54 | (P63104) 14-3-3 protein zeta/delta (Protein kinase C inhibitor protein 1) (KCIP-1)                                                                                                                                                                  | 1433Z_HUMAN    | 27728  | 100% | 5  | 7  | 28  | 0.03% | 29.80% |
| DRO-p54 | (P63244) Guanine nucleotide-binding protein beta subunit 2-like 1 (Guanine nucleotide-binding protein beta subunit-like protein 12.3) (Receptor of activated protein kinase C 1) (RACK1) (Receptor for activated C kinase)                          | GBLP_HUMAN     | 34928  | 100% | 2  | 2  | 3   | 0.00% | 8.86%  |
| DRO-p54 | (P68104) Elongation factor 1-alpha 1 (EF-1-alpha-1) (Elongation factor 1 A-1) (eEF1A-1) (Elongation factor Tu) (EF-Tu)                                                                                                                              | EF1A1_HUMAN    | 50123  | 100% | 13 | 17 | 136 | 0.15% | 45.70% |
| DRO-p54 | (P68363) Tubulin alpha-ubiquitous chain (Alpha-tubulin ubiquitous) (Tubulin K-alpha-1)                                                                                                                                                              | TBAK_HUMAN     | 50134  | 100% | 14 | 17 | 100 | 0.11% | 49.40% |
| DRO-p54 | (P78371) T-complex protein 1 subunit beta (TCP-1-beta) (CCT-beta)                                                                                                                                                                                   | TCPB_HUMAN     | 57341  | 100% | 2  | 2  | 2   | 0.00% | 5.81%  |
| DRO-p54 | (P78527) DNA-dependent protein kinase catalytic subunit (EC 2.7.11.1) (DNA-PK catalytic subunit) (DNA-PKcs) (DNPK1) (p460)                                                                                                                          | PRKDC_HUMAN    | 469078 | 100% | 8  | 8  | 14  | 0.02% | 3.29%  |
| DRO-p54 | (P84077) ADP-ribosylation factor 1                                                                                                                                                                                                                  | ARF1_HUMAN,ARF | 20548  | 100% | 5  | 6  | 27  | 0.03% | 43.90% |
| DRO-p54 | (P84243) Histone H3.3                                                                                                                                                                                                                               | H33_HUMAN      | 15180  | 100% | 2  | 3  | 65  | 0.07% | 28.90% |
| DRO-p54 | (Q00610) Clathrin heavy chain 1 (CLH-17)                                                                                                                                                                                                            | CLH1_HUMAN     | 191470 | 100% | 8  | 9  | 17  | 0.02% | 9.20%  |
| DRO-p54 | (Q00839) Heterogenous nuclear ribonucleoprotein U (hnRNP U) (Scaffold attachment factor A) (SAF-A) (p120) (pp120)                                                                                                                                   | HNRPU_HUMAN    | 90331  | 100% | 5  | 5  | 6   | 0.01% | 11.80% |
| DRO-p54 | (Q01082) Spectrin beta chain, brain 1 (Spectrin, non-erythroid beta chain 1) (Beta-II spectrin) (Fodrin beta chain)                                                                                                                                 | SPTB2_HUMAN    | 274617 | 100% | 2  | 2  | 2   | 0.00% | 1.65%  |
| DRO-p54 | (Q01105) Protein SET (Phosphatase 2A inhibitor I2PP2A) (I-2PP2A) (Template-activating factor I) (TAF-I) (HLA-DR-associated protein II) (PHAPII) (Inhibitor of granzyme A-activated DNase) (IGAAD)                                                   | SET_HUMAN      | 33471  | 100% | 4  | 4  | 8   | 0.01% | 17.90% |
| DRO-p54 | (Q01518) Adenylyl cyclase-associated protein 1 (CAP 1)                                                                                                                                                                                              | CAP1_HUMAN     | 51524  | 100% | 2  | 2  | 7   | 0.01% | 8.65%  |
| DRO-p54 | (Q02809) Procollagen-lysine,2-oxoglutarate 5-dioxygenase 1 precursor (EC 1.14.11.4) (Lysyl hydroxylase 1) (LH1)                                                                                                                                     | PLOD1_HUMAN    | 83535  | 100% | 12 | 13 | 54  | 0.06% | 25.00% |
| DRO-p54 | (Q02878) 60S ribosomal protein L6 (TAX-responsive enhancer element-binding protein 107) (TAXREB107) (Neoplasm-related protein C140)                                                                                                                 | RL6_HUMAN      | 32580  | 100% | 7  | 9  | 34  | 0.04% | 29.30% |
| DRO-p54 | (Q05519) Splicing factor arginine/serine-rich 11 (Arginine-rich 54 kDa nuclear protein) (p54)                                                                                                                                                       | SFR11_HUMAN    | 53526  | 100% | 2  | 2  | 2   | 0.00% | 6.40%  |
| DRO-p54 | (Q06323) Proteasome activator complex subunit 1 (Proteasome activator 28-alpha subunit) (PA28alpha) (PA28a) (Activator of multicatalytic protease subunit 1) (11S regulator complex alpha subunit) (REG-alpha) (Interferon gamma up-regulated I-51) | PSME1_HUMAN    | 28706  | 100% | 2  | 2  | 2   | 0.00% | 9.24%  |
| DRO-p54 | (Q07020) 60S ribosomal protein L18                                                                                                                                                                                                                  | RL18_HUMAN     | 21486  | 100% | 3  | 3  | 24  | 0.03% | 19.80% |

## Protein Identified Sequence Coverage in DRO-1

|         |                                                                                                                                                                                                                                      |             |        |      |   |    |    |       |        |
|---------|--------------------------------------------------------------------------------------------------------------------------------------------------------------------------------------------------------------------------------------|-------------|--------|------|---|----|----|-------|--------|
| DRO-p54 | (Q07021) Complement component 1 Q subcomponent-binding protein, mitochondrial precursor (Glycoprotein gC1qBP) (C1qBP) (GC1q-R protein) (Hyaluronan-binding protein 1) (Mitochondrial matrix protein p32) (p33)                       | C1QBP_HUMAN | 31345  | 100% | 3 | 3  | 10 | 0.01% | 21.60% |
| DRO-p54 | (Q07954) Low-density lipoprotein receptor-related protein 1 precursor (LRP) (Alpha-2-macroglobulin receptor) (A2MR) (Apolipoprotein E receptor) (APOER) (CD91 antigen)                                                               | LRP1_HUMAN  | 504543 | 100% | 5 | 5  | 5  | 0.01% | 1.96%  |
| DRO-p54 | (Q08211) ATP-dependent RNA helicase A (EC 3.6.1.-) (Nuclear DNA helicase II) (NDH II) (DEAH box protein 9)                                                                                                                           | DHX9_HUMAN  | 140866 | 100% | 3 | 3  | 5  | 0.01% | 2.91%  |
| DRO-p54 | (Q08380) Galectin-3-binding protein precursor (Lectin galactoside-binding soluble 3-binding protein) (Mac-2-binding protein) (Mac-2 BP) (MAC2BP) (Tumor-associated antigen 90K)                                                      | LG3BP_HUMAN | 65314  | 100% | 4 | 4  | 8  | 0.01% | 10.30% |
| DRO-p54 | (Q08431) Lactadherin precursor (Milk fat globule-EGF factor 8) (MFG-E8) (HMFG) (Breast epithelial antigen BA46) (MFGM) [Contains: Lactadherin short form; Medin]                                                                     | MFGM_HUMAN  | 43105  | 100% | 9 | 10 | 14 | 0.02% | 39.80% |
| DRO-p54 | (Q09666) Neuroblast differentiation-associated protein AHNAK (Desmoyokin) (Fragments)                                                                                                                                                | AHNK_HUMAN  | 312479 | 100% | 9 | 9  | 15 | 0.02% | 4.59%  |
| DRO-p54 | (Q12905) Interleukin enhancer-binding factor 2 (Nuclear factor of activated T-cells 45 kDa)                                                                                                                                          | ILF2_HUMAN  | 43045  | 100% | 3 | 3  | 4  | 0.00% | 12.10% |
| DRO-p54 | (Q12931) Heat shock protein 75 kDa, mitochondrial precursor (HSP 75) (Tumor necrosis factor type 1 receptor-associated protein) (TRAP-1) (TNFR-associated protein 1)                                                                 | TRAP1_HUMAN | 80095  | 100% | 2 | 2  | 2  | 0.00% | 7.53%  |
| DRO-p54 | (Q13162) Peroxiredoxin-4 (EC 1.11.1.15) (Prx-IV) (Thioredoxin peroxidase A0372) (Thioredoxin-dependent peroxide reductase A0372) (Antioxidant enzyme AOE372) (AOE37-2)                                                               | PRDX4_HUMAN | 30523  | 100% | 4 | 4  | 6  | 0.01% | 22.10% |
| DRO-p54 | (Q13428) Treacle protein (Treacher Collins syndrome protein)                                                                                                                                                                         | TCOF_HUMAN  | 144293 | 100% | 3 | 3  | 9  | 0.01% | 3.61%  |
| DRO-p54 | (Q13510) Acid ceramidase precursor (EC 3.5.1.23) (Acylsphingosine deacylase) (N-acylsphingosine amidohydrolase) (AC) (Putative 32 kDa heart protein) (PHP32) [Contains: Acid ceramidase alpha subunit; Acid ceramidase beta subunit] | ASAH1_HUMAN | 44633  | 100% | 7 | 7  | 30 | 0.03% | 24.60% |
| DRO-p54 | (Q13523) Serine/threonine-protein kinase PRP4 homolog (EC 2.7.11.1) (PRP4 pre-mRNA-processing factor 4 homolog) (PRP4 kinase)                                                                                                        | PRP4B_HUMAN | 116961 | 100% | 2 | 2  | 6  | 0.01% | 1.39%  |
| DRO-p54 | (Q13596) Sorting nexin-1                                                                                                                                                                                                             | SNX1_HUMAN  | 59053  | 100% | 2 | 2  | 3  | 0.00% | 5.17%  |
| DRO-p54 | (Q13813) Spectrin alpha chain, brain (Spectrin, non-erythroid alpha chain) (Alpha-II spectrin) (Fodrin alpha chain)                                                                                                                  | SPTA2_HUMAN | 284525 | 100% | 4 | 4  | 5  | 0.01% | 3.20%  |
| DRO-p54 | (Q14204) Dynein heavy chain, cytosolic (DYHC) (Cytoplasmic dynein heavy chain 1) (DHC1) (Dynein heavy chain 1, cytoplasmic 1)                                                                                                        | DYHC_HUMAN  | 532388 | 100% | 5 | 5  | 7  | 0.01% | 2.35%  |
| DRO-p54 | (Q14696) Mesoderm development candidate 2 (NY-REN-61 antigen)                                                                                                                                                                        | MESD2_HUMAN | 26060  | 100% | 2 | 2  | 8  | 0.01% | 8.97%  |
| DRO-p54 | (Q14697) Neutral alpha-glucosidase AB precursor (EC 3.2.1.84) (Glucosidase II alpha subunit)                                                                                                                                         | GANAB_HUMAN | 106858 | 100% | 9 | 10 | 15 | 0.02% | 13.70% |

## Protein Identified Sequence Coverage in DRO-1

|         |                                                                                                                                                                                                      |                |        |      |    |    |     |       |        |
|---------|------------------------------------------------------------------------------------------------------------------------------------------------------------------------------------------------------|----------------|--------|------|----|----|-----|-------|--------|
| DRO-p54 | (Q14956) Transmembrane glycoprotein NMB precursor (Transmembrane glycoprotein HGFIN)                                                                                                                 | GPNMB_HUMAN    | 63905  | 100% | 2  | 3  | 14  | 0.02% | 6.82%  |
| DRO-p54 | (Q14974) Importin beta-1 subunit (Karyopherin beta-1 subunit) (Nuclear factor P97) (Importin 90)                                                                                                     | IMB1_HUMAN     | 97153  | 100% | 3  | 3  | 12  | 0.01% | 6.62%  |
| DRO-p54 | (Q14993) Collagen alpha-1(XIX) chain precursor (Collagen alpha-1(Y) chain)                                                                                                                           | COJA1_HUMAN    | 115206 | 100% | 5  | 6  | 22  | 0.02% | 6.22%  |
| DRO-p54 | (Q15084) Protein disulfide-isomerase A6 precursor (EC 5.3.4.1) (Protein disulfide isomerase P5) (Thioredoxin domain-containing protein 7)                                                            | PDIA6_HUMAN    | 48104  | 100% | 16 | 22 | 182 | 0.20% | 51.10% |
| DRO-p54 | (Q15149) Plectin-1 (PLTN) (PCN) (Hemidesmosomal protein 1) (HD1)                                                                                                                                     | PLEC1_HUMAN    | 531712 | 100% | 2  | 2  | 5   | 0.01% | 0.58%  |
| DRO-p54 | (Q15293) Reticulocalbin-1 precursor                                                                                                                                                                  | RCN1_HUMAN     | 38873  | 100% | 2  | 2  | 3   | 0.00% | 11.80% |
| DRO-p54 | (Q15365) Poly(rC)-binding protein 1 (Alpha-CP1) (hnRNP-E1) (Nucleic acid-binding protein SUB2.3)                                                                                                     | PCBP1_HUMAN    | 37480  | 100% | 2  | 2  | 2   | 0.00% | 9.27%  |
| DRO-p54 | (Q15758) Neutral amino acid transporter B(0) (ATB(0)) (Sodium-dependent neutral amino acid transporter type 2) (RD114/simian type D retrovirus receptor) (Baboon M7 virus receptor)                  | AAAT_HUMAN     | 56582  | 100% | 2  | 2  | 5   | 0.01% | 4.44%  |
| DRO-p54 | (Q16363) Laminin alpha-4 chain precursor                                                                                                                                                             | LAMA4_HUMAN    | 202512 | 100% | 13 | 15 | 29  | 0.03% | 12.80% |
| DRO-p54 | (Q16610) Extracellular matrix protein 1 precursor (Secretory component p85)                                                                                                                          | ECM1_HUMAN     | 60655  | 100% | 23 | 26 | 179 | 0.20% | 63.10% |
| DRO-p54 | (Q16629) Splicing factor, arginine/serine-rich 7 (Splicing factor 9G8)                                                                                                                               | SFRS7_HUMAN    | 27350  | 100% | 2  | 2  | 2   | 0.00% | 8.82%  |
| DRO-p54 | (Q16658) Fascin (Singed-like protein) (55 kDa actin bundling protein) (p55)                                                                                                                          | FSCN1_HUMAN    | 54381  | 100% | 2  | 2  | 3   | 0.00% | 7.11%  |
| DRO-p54 | (Q16881) Thioredoxin reductase 1, cytoplasmic precursor (EC 1.8.1.9) (TR) (TR1)                                                                                                                      | TRXR1_HUMAN    | 54689  | 100% | 3  | 3  | 8   | 0.01% | 17.80% |
| DRO-p54 | (Q16891) Mitochondrial inner membrane protein (Mitofilin) (p87/89) (Proliferation-inducing gene 4 protein)                                                                                           | IMMT_HUMAN     | 83661  | 100% | 2  | 3  | 6   | 0.01% | 4.49%  |
| DRO-p54 | (Q5ZPR3) CD276 antigen precursor (Costimulatory molecule) (B7 homolog 3) (B7-H3) (4Ig-B7-H3)                                                                                                         | CD276_HUMAN    | 57216  | 100% | 2  | 2  | 3   | 0.00% | 10.50% |
| DRO-p54 | (Q6FI13) Histone H2A type 2-A (H2A.2)                                                                                                                                                                | H2A2A_HUMAN,H2 | 13947  | 100% | 3  | 5  | 191 | 0.21% | 58.10% |
| DRO-p54 | (Q6UVK1) Chondroitin sulfate proteoglycan 4 precursor (Chondroitin sulfate proteoglycan NG2) (Melanoma chondroitin sulfate proteoglycan) (Melanoma-associated chondroitin sulfate proteoglycan)      | CSPG4_HUMAN    | 250476 | 100% | 41 | 50 | 191 | 0.21% | 29.50% |
| DRO-p54 | (Q71UI9) Histone H2AV (H2A.F/Z)                                                                                                                                                                      | H2AV_HUMAN,H2A | 13404  | 100% | 5  | 5  | 59  | 0.07% | 54.30% |
| DRO-p54 | (Q7Z6E9) Retinoblastoma-binding protein 6 (p53-associated cellular protein of testis) (Proliferation potential-related protein) (Protein P2P-R) (Retinoblastoma-binding Q protein 1) (Protein RBQ-1) | RBBP6_HUMAN    | 201551 | 100% | 2  | 2  | 3   | 0.00% | 0.95%  |
| DRO-p54 | (Q86YB8) ERO1-like protein beta precursor (EC 1.8.4.-) (ERO1-Lbeta) (Oxidoreductin-1-Lbeta) (Endoplasmic oxidoreductin-1-like protein B)                                                             | ERO1B_HUMAN    | 53511  | 100% | 5  | 5  | 22  | 0.02% | 16.90% |
| DRO-p54 | (Q8IYB3) Serine/arginine repetitive matrix protein 1 (Ser/Arg-related nuclear matrix protein) (SR-related nuclear matrix protein of 160 kDa) (SRm160)                                                | SRRM1_HUMAN    | 102319 | 100% | 5  | 7  | 37  | 0.04% | 9.62%  |

## Protein Identified Sequence Coverage in DRO-1

|         |                                                                                                                                                                                                                                         |             |       |      |    |    |     |       |        |
|---------|-----------------------------------------------------------------------------------------------------------------------------------------------------------------------------------------------------------------------------------------|-------------|-------|------|----|----|-----|-------|--------|
| DRO-p54 | (Q8N474) Secreted frizzled-related protein 1 precursor (sFRP-1) (Frizzled-related protein 1) (FRP-1) (Secreted apoptosis-related protein 2) (SARP-2)                                                                                    | SFRP1_HUMAN | 35368 | 100% | 3  | 4  | 11  | 0.01% | 16.20% |
| DRO-p54 | (Q8NB7J) Sulfatase-modifying factor 2 precursor (C-alpha-formylglycine-generating enzyme 2)                                                                                                                                             | SUMF2_HUMAN | 33839 | 100% | 9  | 11 | 77  | 0.09% | 35.50% |
| DRO-p54 | (Q8NBS9) Thioredoxin domain-containing protein 5 precursor (Thioredoxin-like protein p46) (Endoplasmic reticulum protein ERp46)                                                                                                         | TXND5_HUMAN | 47611 | 100% | 10 | 11 | 41  | 0.05% | 36.10% |
| DRO-p54 | (Q8NBX0) Probable saccharopine dehydrogenase (EC 1.5.1.9)                                                                                                                                                                               | SCPDH_HUMAN | 47135 | 100% | 5  | 5  | 12  | 0.01% | 28.40% |
| DRO-p54 | (Q8NCC3) 1-O-acylceramide synthase precursor (EC 2.3.1.-) (ACS) (Lysosomal phospholipase A2) (Lysophospholipase 3) (LPLA2) (LCAT-like lysophospholipase) (LLPL)                                                                         | LYPA3_HUMAN | 46641 | 100% | 3  | 3  | 3   | 0.00% | 13.80% |
| DRO-p54 | (Q92820) Gamma-glutamyl hydrolase precursor (EC 3.4.19.9) (Gamma-Glu-X carboxypeptidase) (Conjugase) (GH)                                                                                                                               | GGH_HUMAN   | 35948 | 100% | 8  | 12 | 74  | 0.08% | 35.80% |
| DRO-p54 | (Q969H8) Protein C19orf10 precursor (Stromal cell-derived growth factor SF20) (Interleukin-25) (IL-25)                                                                                                                                  | CS010_HUMAN | 18777 | 100% | 2  | 2  | 4   | 0.00% | 15.60% |
| DRO-p54 | (Q969P0) Immunoglobulin superfamily member 8 precursor (CD81 partner 3) (Glu-Trp-Ile EWI motif containing protein 2) (EWI-2) (Keratinocytes-associated transmembrane protein 4) (KCT-4) (LIR-D1) (CD316 antigen)                        | IGSF8_HUMAN | 65015 | 100% | 3  | 4  | 6   | 0.01% | 9.30%  |
| DRO-p54 | (Q96AY3) FK506-binding protein 10 precursor (EC 5.2.1.8) (Peptidyl-prolyl cis-trans isomerase) (PPIase) (Rotamase) (65 kDa FK506-binding protein) (FKBP65) (Immunophilin FKBP65)                                                        | FKB10_HUMAN | 64228 | 100% | 17 | 19 | 71  | 0.08% | 44.00% |
| DRO-p54 | (Q96CG8) Collagen triple helix repeat-containing protein 1 precursor (NMTC1 protein)                                                                                                                                                    | CTHR1_HUMAN | 26207 | 100% | 6  | 7  | 19  | 0.02% | 35.00% |
| DRO-p54 | (Q96D15) Reticulocalbin-3 precursor (EF-hand calcium-binding protein RLP49)                                                                                                                                                             | RCN3_HUMAN  | 37475 | 100% | 3  | 3  | 4   | 0.00% | 21.00% |
| DRO-p54 | (Q96HE7) ERO1-like protein alpha precursor (EC 1.8.4.-) (ERO1-Lalpha) (Oxidoreductin-1-Lalpha) (Endoplasmic oxidoreductin-1-like protein) (ERO1-L)                                                                                      | ERO1A_HUMAN | 54377 | 100% | 22 | 25 | 187 | 0.21% | 66.00% |
| DRO-p54 | (Q96JB6) Lysyl oxidase homolog 4 precursor (EC 1.4.3.-) (Lysyl oxidase-like protein 4) (Lysyl oxidase-related protein C)                                                                                                                | LOXL4_HUMAN | 84463 | 100% | 2  | 2  | 6   | 0.01% | 5.42%  |
| DRO-p54 | (Q99538) Legumain precursor (EC 3.4.22.34) (Asparaginyl endopeptidase) (Protease, cysteine 1)                                                                                                                                           | LGMN_HUMAN  | 49393 | 100% | 5  | 6  | 27  | 0.03% | 20.30% |
| DRO-p54 | (Q99988) Growth/differentiation factor 15 precursor (GDF-15) (Placental bone morphogenic protein) (Placental TGF-beta) (Macrophage inhibitory cytokine 1) (MIC-1) (Prostate differentiation factor) (NSAID-regulated protein 1) (NRG-1) | GDF15_HUMAN | 34151 | 100% | 11 | 15 | 298 | 0.33% | 50.30% |
| DRO-p54 | (Q9HAT2) Sialate O-acetyltransferase precursor (EC 3.1.1.53) (Sialic acid-specific 9-O-acetyltransferase) (H-Lse)                                                                                                                       | SIAE_HUMAN  | 58297 | 100% | 2  | 2  | 21  | 0.02% | 4.40%  |
| DRO-p54 | (Q9HDC9) Adipocyte plasma membrane-associated protein (BSCv protein)                                                                                                                                                                    | APMAP_HUMAN | 46464 | 100% | 2  | 2  | 3   | 0.00% | 9.86%  |

## Protein Identified Sequence Coverage in DRO-1

|         |                                                                                                                                                                                                                    |             |        |      |    |    |    |       |        |
|---------|--------------------------------------------------------------------------------------------------------------------------------------------------------------------------------------------------------------------|-------------|--------|------|----|----|----|-------|--------|
| DRO-p54 | (Q9NPH3) Interleukin-1 receptor accessory protein precursor (IL-1 receptor accessory protein) (IL-1RAcP)                                                                                                           | IL1AP_HUMAN | 65401  | 100% | 2  | 2  | 3  | 0.00% | 6.49%  |
| DRO-p54 | (Q9NQC3) Reticulon-4 (Neurite outgrowth inhibitor) (Nogo protein) (Foccen) (Neuroendocrine-specific protein) (NSP) (Neuroendocrine-specific protein C homolog) (RTN-x) (Reticulon-5)                               | RTN4_HUMAN  | 129917 | 100% | 2  | 2  | 7  | 0.01% | 3.94%  |
| DRO-p54 | (Q9NTK5) Putative GTP-binding protein PTD004                                                                                                                                                                       | PTD4_HUMAN  | 44727  | 100% | 2  | 2  | 4  | 0.00% | 6.57%  |
| DRO-p54 | (Q9NYU2) UDP-glucose:glycoprotein glucosyltransferase 1 precursor (EC 2.4.1.-) (UDP-glucose ceramide glucosyltransferase-like 1) (UDP-Glc:glycoprotein glucosyltransferase) (HUGT1)                                | UGGG1_HUMAN | 174965 | 100% | 11 | 11 | 17 | 0.02% | 14.90% |
| DRO-p54 | (Q9P2B2) Prostaglandin F2 receptor negative regulator precursor (Prostaglandin F2-alpha receptor regulatory protein) (Prostaglandin F2-alpha receptor-associated protein) (CD9 partner 1) (CD9P-1) (CD315 antigen) | FPRP_HUMAN  | 98538  | 100% | 8  | 8  | 13 | 0.01% | 14.30% |
| DRO-p54 | (Q9UBP6) tRNA (guanine-N(7)-)-methyltransferase (EC 2.1.1.33) (tRNA(m7G46)-methyltransferase) (Methyltransferase-like protein 1)                                                                                   | TRMB_HUMAN  | 31454  | 100% | 2  | 3  | 12 | 0.01% | 10.50% |
| DRO-p54 | (Q9UBR2) Cathepsin Z precursor (EC 3.4.22.-) (Cathepsin X) (Cathepsin P)                                                                                                                                           | CATZ_HUMAN  | 33850  | 100% | 3  | 3  | 17 | 0.02% | 15.20% |
| DRO-p54 | (Q9UBS4) DnaJ homolog subfamily B member 11 precursor (ER-associated dnaJ protein 3) (ErJ3) (ER-associated Hsp40 co-chaperone) (hDj9) (PWP1-interacting protein 4)                                                 | DNJBB_HUMAN | 40497  | 100% | 2  | 2  | 4  | 0.00% | 8.94%  |
| DRO-p54 | (Q9UHG3) Prenylcysteine oxidase precursor (EC 1.8.3.5) (PCL1)                                                                                                                                                      | PCYOX_HUMAN | 56595  | 100% | 5  | 5  | 8  | 0.01% | 14.10% |
| DRO-p54 | (Q9UHL4) Dipeptidyl-peptidase 2 precursor (EC 3.4.14.2) (Dipeptidyl-peptidase II) (DPP II) (Dipeptidyl aminopeptidase II) (Quiescent cell proline dipeptidase) (Dipeptidyl peptidase 7)                            | DPP2_HUMAN  | 54311  | 100% | 11 | 12 | 24 | 0.03% | 36.60% |
| DRO-p54 | (Q9UL46) Proteasome activator complex subunit 2 (Proteasome activator 28-beta subunit) (PA28beta) (PA28b) (Activator of multicatalytic protease subunit 2) (11S regulator complex beta subunit) (REG-beta)         | PSME2_HUMAN | 27213  | 100% | 3  | 4  | 6  | 0.01% | 21.40% |
| DRO-p54 | (Q9UM22) Mammalian ependymin-related protein 1 precursor (MERP-1) (UCC1 protein)                                                                                                                                   | EPDR1_HUMAN | 25420  | 100% | 2  | 2  | 9  | 0.01% | 14.30% |
| DRO-p54 | (Q9UMX5) Neudesin precursor (Neuron-derived neurotrophic factor) (Secreted protein of unknown function) (SPUF protein)                                                                                             | NENF_HUMAN  | 18839  | 100% | 5  | 5  | 17 | 0.02% | 37.80% |
| DRO-p54 | (Q9UNW1) Multiple inositol polyphosphate phosphatase 1 precursor (EC 3.1.3.62) (Inositol (1,3,4,5)-tetrakisphosphate 3-phosphatase) (Ins(1,3,4,5)P(4) 3-phosphatase)                                               | MINP1_HUMAN | 55035  | 100% | 5  | 6  | 13 | 0.01% | 15.00% |
| DRO-p54 | (Q9Y2B0) MIR-interacting saposin-like protein precursor (Transmembrane protein 4) (Putative secreted protein ZSIG9)                                                                                                | MSAP_HUMAN  | 20635  | 100% | 4  | 5  | 22 | 0.02% | 38.50% |
| DRO-p54 | (Q9Y2G5) GDP-fucose protein O-fucosyltransferase 2 precursor (EC 2.4.1.221) (Peptide-O-fucosyltransferase) (O-FucT-2)                                                                                              | OFUT2_HUMAN | 49959  | 100% | 2  | 2  | 7  | 0.01% | 5.59%  |

## Protein Identified Sequence Coverage in DRO-1

|         |                                                                                                                                                                                                                                                    |             |        |      |    |    |     |       |        |
|---------|----------------------------------------------------------------------------------------------------------------------------------------------------------------------------------------------------------------------------------------------------|-------------|--------|------|----|----|-----|-------|--------|
| DRO-p54 | (Q9Y4L1) 150 kDa oxygen-regulated protein precursor (Orp150) (Hypoxia up-regulated 1)                                                                                                                                                              | OXRP_HUMAN  | 111319 | 100% | 40 | 55 | 386 | 0.43% | 57.50% |
| DRO-p54 | (Q9Y625) Glypican-6 precursor                                                                                                                                                                                                                      | GPC6_HUMAN  | 62718  | 100% | 2  | 2  | 4   | 0.00% | 8.29%  |
| DRO-p54 | (Q9Y680) FK506-binding protein 7 precursor (EC 5.2.1.8) (Peptidyl-prolyl cis-trans isomerase) (PPIase) (Rotamase) (FKBP-23)                                                                                                                        | FKBP7_HUMAN | 29992  | 100% | 4  | 4  | 6   | 0.01% | 27.80% |
| DRO-p54 | (Q9Y6C2) EMILIN-1 precursor (Elastin microfibril interface-located protein 1) (Elastin microfibril interfacier 1)                                                                                                                                  | EMIL1_HUMAN | 106677 | 100% | 6  | 6  | 18  | 0.02% | 10.90% |
| DRO-p56 | (O00115) Deoxyribonuclease-2-alpha precursor (EC 3.1.22.1) (Deoxyribonuclease II alpha) (DNase II alpha) (Acid DNase) (Lysosomal DNase II) (R31240_2)                                                                                              | DNS2A_HUMAN | 39563  | 100% | 4  | 4  | 21  | 0.04% | 13.10% |
| DRO-p56 | (O00299) Chloride intracellular channel protein 1 (Nuclear chloride ion channel 27) (NCC27) (Chloride channel ABP) (Regulatory nuclear chloride ion channel protein) (hRNCC)                                                                       | CLIC1_HUMAN | 26774  | 100% | 5  | 7  | 20  | 0.04% | 40.00% |
| DRO-p56 | (O00487) 26S proteasome non-ATPase regulatory subunit 14 (26S proteasome regulatory subunit rpn11) (26S proteasome-associated PAD1 homolog 1)                                                                                                      | PSDE_HUMAN  | 34559  | 100% | 2  | 3  | 3   | 0.01% | 19.40% |
| DRO-p56 | (O00754) Lysosomal alpha-mannosidase precursor (EC 3.2.1.24) (Mannosidase, alpha B) (Lysosomal acid alpha-mannosidase) (Laman) (Mannosidase alpha class 2B member 1) [Contains: Lysosomal alpha-mannosidase A peptide; Lysosomal alpha-mannosidase | MA2B1_HUMAN | 113656 | 100% | 5  | 5  | 11  | 0.02% | 9.70%  |
| DRO-p56 | (O14773) Tripeptidyl-peptidase 1 precursor (EC 3.4.14.9) (Tripeptidyl-peptidase I) (TPP-I) (Tripeptidyl aminopeptidase) (Lysosomal pepstatin insensitive protease) (LPIC) (Growth-inhibiting gene 1 protein)                                       | TPP1_HUMAN  | 61230  | 100% | 8  | 9  | 35  | 0.07% | 29.30% |
| DRO-p56 | (O14818) Proteasome subunit alpha type 7 (EC 3.4.25.1) (Proteasome subunit RC6-1) (Proteasome subunit XAPC7)                                                                                                                                       | PSA7_HUMAN  | 27869  | 100% | 2  | 2  | 3   | 0.01% | 20.60% |
| DRO-p56 | (O15460) Prolyl 4-hydroxylase alpha-2 subunit precursor (EC 1.14.11.2) (4-PH alpha-2) (Procollagen-proline,2-oxoglutarate-4-dioxygenase alpha-2 subunit)                                                                                           | P4HA2_HUMAN | 60885  | 100% | 2  | 2  | 2   | 0.00% | 8.60%  |
| DRO-p56 | (O15511) Actin-related protein 2/3 complex subunit 5 (ARP2/3 complex 16 kDa subunit) (p16-ARC)                                                                                                                                                     | ARPC5_HUMAN | 16171  | 100% | 2  | 2  | 3   | 0.01% | 20.70% |
| DRO-p56 | (O43175) D-3-phosphoglycerate dehydrogenase (EC 1.1.1.95) (3-PGDH)                                                                                                                                                                                 | SERA_HUMAN  | 56501  | 100% | 5  | 5  | 12  | 0.02% | 16.00% |
| DRO-p56 | (O43242) 26S proteasome non-ATPase regulatory subunit 3 (26S proteasome regulatory subunit S3) (Proteasome subunit p58)                                                                                                                            | PSD3_HUMAN  | 60962  | 100% | 2  | 2  | 3   | 0.01% | 5.62%  |
| DRO-p56 | (O43399) Tumor protein D54 (hD54) (Tumor protein D52-like 2)                                                                                                                                                                                       | TPD54_HUMAN | 22220  | 100% | 11 | 12 | 51  | 0.10% | 55.80% |
| DRO-p56 | (O43598) c-Myc-responsive protein Rcl                                                                                                                                                                                                              | RCL_HUMAN   | 19090  | 100% | 3  | 3  | 7   | 0.01% | 38.50% |
| DRO-p56 | (O43707) Alpha-actinin-4 (Non-muscle alpha-actinin 4) (F-actin cross linking protein)                                                                                                                                                              | ACTN4_HUMAN | 104839 | 100% | 13 | 13 | 35  | 0.07% | 22.00% |
| DRO-p56 | (O43852) Calumenin precursor (Crocabin) (IEF SSP 9302)                                                                                                                                                                                             | CALU_HUMAN  | 37090  | 100% | 18 | 23 | 206 | 0.39% | 64.80% |

## Protein Identified Sequence Coverage in DRO-1

|         |                                                                                                                                                                                                                |             |        |      |    |    |      |       |        |
|---------|----------------------------------------------------------------------------------------------------------------------------------------------------------------------------------------------------------------|-------------|--------|------|----|----|------|-------|--------|
| DRO-p56 | (O60462) Neuropilin-2 precursor (Vascular endothelial cell growth factor 165 receptor 2)                                                                                                                       | NRP2_HUMAN  | 104815 | 100% | 2  | 2  | 2    | 0.00% | 4.19%  |
| DRO-p56 | (O60568) Procollagen-lysine,2-oxoglutarate 5-dioxygenase 3 precursor (EC 1.14.11.4) (Lysyl hydroxylase 3) (LH3)                                                                                                | PLOD3_HUMAN | 84769  | 100% | 21 | 24 | 66   | 0.13% | 40.20% |
| DRO-p56 | (O60664) Mannose-6-phosphate receptor-binding protein 1 (Cargo selection protein TIP47) (47 kDa mannose 6-phosphate receptor-binding protein) (47 kDa MPR-binding protein) (Placental protein 17) (PP17)       | M6PBP_HUMAN | 47028  | 100% | 3  | 3  | 6    | 0.01% | 18.00% |
| DRO-p56 | (O60884) DnaJ homolog subfamily A member 2 (HIRA-interacting protein 4) (Cell cycle progression restoration gene 3 protein) (Dnj3) (NY-REN-14 antigen)                                                         | DNJA2_HUMAN | 45728  | 100% | 2  | 2  | 2    | 0.00% | 14.10% |
| DRO-p56 | (P00338) L-lactate dehydrogenase A chain (EC 1.1.1.27) (LDH-A) (LDH muscle subunit) (LDH-M) (Proliferation-inducing gene 19 protein) (NY-REN-59 antigen)                                                       | LDHA_HUMAN  | 36540  | 100% | 9  | 9  | 50   | 0.09% | 35.30% |
| DRO-p56 | (P00505) Aspartate aminotransferase, mitochondrial precursor (EC 2.6.1.1) (Transaminase A) (Glutamate oxaloacetate transaminase 2)                                                                             | AATM_HUMAN  | 47459  | 100% | 3  | 3  | 5    | 0.01% | 9.53%  |
| DRO-p56 | (P00558) Phosphoglycerate kinase 1 (EC 2.7.2.3) (Primer recognition protein 2) (PRP 2)                                                                                                                         | PGK1_HUMAN  | 44466  | 100% | 13 | 18 | 96   | 0.18% | 43.80% |
| DRO-p56 | (P01011) Alpha-1-antichymotrypsin precursor (ACT) [Contains: Alpha-1-antichymotrypsin His-Pro-less]                                                                                                            | AACT_HUMAN  | 47635  | 100% | 28 | 39 | 1524 | 2.89% | 68.80% |
| DRO-p56 | (P01023) Alpha-2-macroglobulin precursor (Alpha-2-M)                                                                                                                                                           | A2MG_HUMAN  | 163259 | 100% | 6  | 7  | 9    | 0.02% | 7.12%  |
| DRO-p56 | (P02768) Serum albumin precursor                                                                                                                                                                               | ALBU_HUMAN  | 69349  | 100% | 4  | 4  | 8    | 0.02% | 10.00% |
| DRO-p56 | (P02787) Serotransferrin precursor (Transferrin) (Siderophilin) (Beta-1-metal-binding globulin)                                                                                                                | TRFE_HUMAN  | 77032  | 100% | 10 | 11 | 33   | 0.06% | 24.20% |
| DRO-p56 | (P04004) Vitronectin precursor (Serum spreading factor) (S-protein) (V75) [Contains: Vitronectin V65 subunit; Vitronectin V10 subunit; Somatomedin B]                                                          | VTNC_HUMAN  | 54288  | 100% | 2  | 2  | 8    | 0.02% | 8.79%  |
| DRO-p56 | (P04062) Glucosylceramidase precursor (EC 3.2.1.45) (Beta-glucocerebrosidase) (Acid beta-glucosidase) (D-glucosyl-N-acylsphingosine glucosylase) (Alglucerase) (Imiglucerase)                                  | GLCM_HUMAN  | 59700  | 100% | 8  | 10 | 32   | 0.06% | 28.40% |
| DRO-p56 | (P04075) Fructose-bisphosphate aldolase A (EC 4.1.2.13) (Muscle-type aldolase) (Lung cancer antigen NY-LU-1)                                                                                                   | ALDOA_HUMAN | 39271  | 100% | 9  | 11 | 59   | 0.11% | 46.30% |
| DRO-p56 | (P04083) Annexin A1 (Annexin I) (Lipocortin I) (Calpactin II) (Chromobindin-9) (p35) (Phospholipase A2 inhibitory protein)                                                                                     | ANXA1_HUMAN | 38567  | 100% | 14 | 18 | 105  | 0.20% | 51.60% |
| DRO-p56 | (P04181) Ornithine aminotransferase, mitochondrial precursor (EC 2.6.1.13) (Ornithine--oxo-acid aminotransferase) [Contains: Ornithine aminotransferase, hepatic form; Ornithine aminotransferase, renal form] | OAT_HUMAN   | 48518  | 100% | 7  | 8  | 32   | 0.06% | 29.40% |
| DRO-p56 | (P04264) Keratin, type II cytoskeletal 1 (Cytokeratin-1) (CK-1) (Keratin-1) (K1) (67 kDa cytokeratin) (Hair alpha protein)                                                                                     | K2C1_HUMAN  | 65870  | 100% | 4  | 4  | 4    | 0.01% | 14.50% |



## Protein Identified Sequence Coverage in DRO-1

|         |                                                                                                                                                                                                                                               |             |        |      |    |    |     |       |        |
|---------|-----------------------------------------------------------------------------------------------------------------------------------------------------------------------------------------------------------------------------------------------|-------------|--------|------|----|----|-----|-------|--------|
| DRO-p56 | (P04406) Glyceraldehyde-3-phosphate dehydrogenase (EC 1.2.1.12) (GAPDH)                                                                                                                                                                       | G3P_HUMAN   | 35904  | 100% | 12 | 17 | 218 | 0.41% | 62.00% |
| DRO-p56 | (P04632) Calpain small subunit 1 (CSS1) (Calcium-dependent protease small subunit 1) (Calcium-dependent protease small subunit) (CDPS) (Calpain regulatory subunit) (Calcium-activated neutral proteinase small subunit) (CANP small subunit) | CPNS1_HUMAN | 28299  | 100% | 3  | 4  | 7   | 0.01% | 23.10% |
| DRO-p56 | (P04792) Heat-shock protein beta-1 (HspB1) (Heat shock 27 kDa protein) (HSP 27) (Stress-responsive protein 27) (SRP27) (Estrogen-regulated 24 kDa protein) (28 kDa heat shock protein)                                                        | HSPB1_HUMAN | 22765  | 100% | 6  | 8  | 42  | 0.08% | 58.50% |
| DRO-p56 | (P04844) Dolichyl-diphosphooligosaccharide--protein glycosyltransferase 63 kDa subunit precursor (EC 2.4.1.119) (Ribophorin II) (RPN-II) (RIBIIR)                                                                                             | RIB2_HUMAN  | 69267  | 100% | 4  | 4  | 11  | 0.02% | 12.00% |
| DRO-p56 | (P05023) Sodium/potassium-transporting ATPase alpha-1 chain precursor (EC 3.6.3.9) (Sodium pump 1) (Na+/K+ ATPase 1)                                                                                                                          | AT1A1_HUMAN | 112882 | 100% | 7  | 8  | 13  | 0.02% | 13.90% |
| DRO-p56 | (P05198) Eukaryotic translation initiation factor 2 subunit 1 (Eukaryotic translation initiation factor 2 alpha subunit) (eIF-2-alpha) (EIF-2alpha) (EIF-2A)                                                                                  | IF2A_HUMAN  | 35964  | 100% | 4  | 4  | 6   | 0.01% | 26.80% |
| DRO-p56 | (P05362) Intercellular adhesion molecule 1 precursor (ICAM-1) (Major group rhinovirus receptor) (CD54 antigen)                                                                                                                                | ICAM1_HUMAN | 57807  | 100% | 3  | 3  | 8   | 0.02% | 8.27%  |
| DRO-p56 | (P05387) 60S acidic ribosomal protein P2 (NY-REN-44 antigen)                                                                                                                                                                                  | RLA2_HUMAN  | 11647  | 100% | 5  | 6  | 13  | 0.02% | 69.60% |
| DRO-p56 | (P05388) 60S acidic ribosomal protein P0 (L10E)                                                                                                                                                                                               | RLA0_HUMAN  | 34256  | 100% | 9  | 12 | 47  | 0.09% | 43.80% |
| DRO-p56 | (P05455) Lupus La protein (Sjogren syndrome type B antigen) (SS-B) (La ribonucleoprotein) (La autoantigen)                                                                                                                                    | LA_HUMAN    | 46821  | 100% | 3  | 3  | 6   | 0.01% | 11.30% |
| DRO-p56 | (P06132) Uroporphyrinogen decarboxylase (EC 4.1.1.37) (URO-D) (UPD)                                                                                                                                                                           | DCUP_HUMAN  | 40769  | 100% | 3  | 3  | 3   | 0.01% | 21.30% |
| DRO-p56 | (P06396) Gelsolin precursor (Actin-depolymerizing factor) (ADF) (Brevin) (AGEL)                                                                                                                                                               | GELS_HUMAN  | 85680  | 100% | 7  | 7  | 17  | 0.03% | 19.40% |
| DRO-p56 | (P06576) ATP synthase beta chain, mitochondrial precursor (EC 3.6.3.14)                                                                                                                                                                       | ATPB_HUMAN  | 56543  | 100% | 4  | 4  | 10  | 0.02% | 21.40% |
| DRO-p56 | (P06733) Alpha-enolase (EC 4.2.1.11) (2-phospho-D glycerate hydro-lyase) (Non-neural enolase) (NNE) (Enolase 1) (Phosphopyruvate hydratase) (C-myc promoter-binding protein) (MBP-1) (MPB-1) (Plasminogen-binding protein)                    | ENOA_HUMAN  | 47021  | 100% | 16 | 27 | 652 | 1.23% | 61.70% |
| DRO-p56 | (P06744) Glucose-6-phosphate isomerase (EC 5.3.1.9) (GPI) (Phosphoglucose isomerase) (PGI) (Phosphohexose isomerase) (PHI) (Neuroleukin) (NLK) (Sperm antigen 36) (SA-36)                                                                     | G6PI_HUMAN  | 62999  | 100% | 4  | 5  | 11  | 0.02% | 16.50% |
| DRO-p56 | (P06748) Nucleophosmin (NPM) (Nucleolar phosphoprotein B23) (Numatrin) (Nucleolar protein NQ38)                                                                                                                                               | NPM_HUMAN   | 32557  | 100% | 4  | 6  | 34  | 0.06% | 22.80% |
| DRO-p56 | (P06865) Beta-hexosaminidase alpha chain precursor (EC 3.2.1.52) (N-acetyl-beta-glucosaminidase) (Beta-N-acetylhexosaminidase) (Hexosaminidase A)                                                                                             | HEXA_HUMAN  | 60672  | 100% | 18 | 23 | 77  | 0.15% | 45.20% |

## Protein Identified Sequence Coverage in DRO-1

|         |                                                                                                                                                                                                                                                      |             |        |      |    |    |     |       |        |
|---------|------------------------------------------------------------------------------------------------------------------------------------------------------------------------------------------------------------------------------------------------------|-------------|--------|------|----|----|-----|-------|--------|
| DRO-p56 | (P07093) Glia-derived nexin precursor (GDN) (Protease nexin I) (PN-1) (Protease inhibitor 7)                                                                                                                                                         | GDN_HUMAN   | 43985  | 100% | 2  | 2  | 10  | 0.02% | 8.04%  |
| DRO-p56 | (P07195) L-lactate dehydrogenase B chain (EC 1.1.1.27) (LDH-B) (LDH heart subunit) (LDH-H) (NY-REN-46 antigen)                                                                                                                                       | LDHB_HUMAN  | 36489  | 100% | 10 | 11 | 50  | 0.09% | 34.50% |
| DRO-p56 | (P07237) Protein disulfide-isomerase precursor (EC 5.3.4.1) (PDI) (Prolyl 4-hydroxylase beta subunit) (Cellular thyroid hormone-binding protein) (p55)                                                                                               | PDIA1_HUMAN | 57100  | 100% | 19 | 26 | 134 | 0.25% | 49.00% |
| DRO-p56 | (P07339) Cathepsin D precursor (EC 3.4.23.5) [Contains: Cathepsin D light chain; Cathepsin D heavy chain]                                                                                                                                            | CATD_HUMAN  | 44535  | 100% | 11 | 17 | 148 | 0.28% | 43.00% |
| DRO-p56 | (P07355) Annexin A2 (Annexin II) (Lipocortin II) (Calpactin I heavy chain) (Chromobindin-8) (p36) (Protein I) (Placental anticoagulant protein IV) (PAP-IV)                                                                                          | ANXA2_HUMAN | 38457  | 100% | 6  | 6  | 19  | 0.04% | 29.00% |
| DRO-p56 | (P07437) Tubulin beta-2 chain                                                                                                                                                                                                                        | TBB2_HUMAN  | 49653  | 100% | 16 | 20 | 91  | 0.17% | 60.60% |
| DRO-p56 | (P07602) Proactivator polypeptide precursor [Contains: Saposin A (Protein A); Saposin B-Val; Saposin B (Sphingolipid activator protein 1) (SAP-1) (Cerebroside sulfate activator) (CSAct) (Dispersin) (Sulfatide/GM1 activator); Saposin C (Co-beta- | SAP_HUMAN   | 58094  | 100% | 22 | 31 | 515 | 0.98% | 48.30% |
| DRO-p56 | (P07686) Beta-hexosaminidase beta chain precursor (EC 3.2.1.52) (N-acetyl-beta-glucosaminidase) (Beta-N-acetylhexosaminidase) (Hexosaminidase B) (Cervical cancer proto-oncogene 7) (HCC-7) [Contains: Beta-hexosaminidase beta-B chain; Beta-hexos  | HEXB_HUMAN  | 63095  | 100% | 15 | 17 | 75  | 0.14% | 41.90% |
| DRO-p56 | (P07711) Cathepsin L precursor (EC 3.4.22.15) (Major excreted protein) (MEP) [Contains: Cathepsin L heavy chain; Cathepsin L light chain]                                                                                                            | CATL_HUMAN  | 37546  | 100% | 6  | 6  | 18  | 0.03% | 29.40% |
| DRO-p56 | (P07737) Profilin-1 (Profilin I)                                                                                                                                                                                                                     | PROF1_HUMAN | 14905  | 100% | 5  | 5  | 22  | 0.04% | 50.40% |
| DRO-p56 | (P07858) Cathepsin B precursor (EC 3.4.22.1) (Cathepsin B1) (APP secretase) (APPS) [Contains: Cathepsin B light chain; Cathepsin B heavy chain]                                                                                                      | CATB_HUMAN  | 37803  | 100% | 11 | 14 | 104 | 0.20% | 44.20% |
| DRO-p56 | (P07900) Heat shock protein HSP 90-alpha (HSP 86) (NY-REN-38 antigen)                                                                                                                                                                                | HS90A_HUMAN | 84514  | 100% | 10 | 11 | 28  | 0.05% | 19.20% |
| DRO-p56 | (P07942) Laminin beta-1 chain precursor (Laminin B1 chain)                                                                                                                                                                                           | LAMB1_HUMAN | 198045 | 100% | 26 | 31 | 72  | 0.14% | 27.20% |
| DRO-p56 | (P07954) Fumarate hydratase, mitochondrial precursor (EC 4.2.1.2) (Fumarase)                                                                                                                                                                         | FUMH_HUMAN  | 54620  | 100% | 2  | 2  | 2   | 0.00% | 9.80%  |
| DRO-p56 | (P08107) Heat shock 70 kDa protein 1 (HSP70.1) (HSP70-1/HSP70-2)                                                                                                                                                                                     | HSP71_HUMAN | 70036  | 100% | 6  | 7  | 15  | 0.03% | 21.70% |
| DRO-p56 | (P08174) Complement decay-accelerating factor precursor (CD55 antigen)                                                                                                                                                                               | DAF_HUMAN   | 41382  | 100% | 6  | 7  | 11  | 0.02% | 23.60% |
| DRO-p56 | (P08195) 4F2 cell-surface antigen heavy chain (4F2hc) (Lymphocyte activation antigen 4F2 large subunit) (4F2 heavy chain antigen) (CD98 antigen)                                                                                                     | 4F2_HUMAN   | 57929  | 100% | 3  | 3  | 7   | 0.01% | 7.37%  |
| DRO-p56 | (P08238) Heat shock protein HSP 90-beta (HSP 84) (HSP 90)                                                                                                                                                                                            | HS90B_HUMAN | 83118  | 100% | 4  | 5  | 7   | 0.01% | 18.10% |

## Protein Identified Sequence Coverage in DRO-1

|         |                                                                                                                                                                                                                                               |             |        |      |    |    |     |       |        |
|---------|-----------------------------------------------------------------------------------------------------------------------------------------------------------------------------------------------------------------------------------------------|-------------|--------|------|----|----|-----|-------|--------|
| DRO-p56 | (P08294) Extracellular superoxide dismutase [Cu-Zn] precursor (EC 1.15.1.1) (EC-SOD)                                                                                                                                                          | SODE_HUMAN  | 25832  | 100% | 4  | 5  | 25  | 0.05% | 20.00% |
| DRO-p56 | (P08572) Collagen alpha-2(IV) chain precursor                                                                                                                                                                                                 | CO4A2_HUMAN | 167522 | 100% | 4  | 4  | 9   | 0.02% | 5.49%  |
| DRO-p56 | (P08582) Melanotransferrin precursor (Melanoma-associated antigen p97) (CD228 antigen)                                                                                                                                                        | TRFM_HUMAN  | 80223  | 100% | 5  | 7  | 10  | 0.02% | 14.10% |
| DRO-p56 | (P08670) Vimentin                                                                                                                                                                                                                             | VIME_HUMAN  | 53503  | 100% | 13 | 14 | 42  | 0.08% | 35.30% |
| DRO-p56 | (P08708) 40S ribosomal protein S17                                                                                                                                                                                                            | RS17_HUMAN  | 15401  | 100% | 4  | 5  | 21  | 0.04% | 43.30% |
| DRO-p56 | (P08758) Annexin A5 (Annexin V) (Lipocortin V) (Endonexin II) (Calphobindin I) (CBP-I) (Placental anticoagulant protein I) (PAP-I) (PP4) (Thromboplastin inhibitor) (Vascular anticoagulant-alpha) (VAC-alpha) (Anchorin CII)                 | ANXA5_HUMAN | 35789  | 100% | 10 | 11 | 52  | 0.10% | 43.60% |
| DRO-p56 | (P08865) 40S ribosomal protein SA (p40) (34/67 kDa laminin receptor) (Colon carcinoma laminin-binding protein) (NEM/1CHD4) (Multidrug resistance-associated protein MGR1-Ag)                                                                  | RSSA_HUMAN  | 32705  | 100% | 12 | 15 | 102 | 0.19% | 57.10% |
| DRO-p56 | (P09104) Gamma-enolase (EC 4.2.1.11) (2-phospho D-glycerate hydro-lyase) (Neural enolase) (Neuron-specific enolase) (NSE) (Enolase 2)                                                                                                         | ENOG_HUMAN  | 47121  | 100% | 5  | 5  | 15  | 0.03% | 32.80% |
| DRO-p56 | (P09211) Glutathione S-transferase P (EC 2.5.1.18) (GST class-pi) (GSTP1-1)                                                                                                                                                                   | GSTP1_HUMAN | 23208  | 100% | 6  | 7  | 22  | 0.04% | 48.80% |
| DRO-p56 | (P09382) Galectin-1 (Lectin galactoside-binding soluble 1) (Beta-galactoside-binding lectin L-14-I) (Lactose-binding lectin 1) (S-Lac lectin 1) (Galaptin) (14 kDa lectin) (HPL) (HBL) (Putative MAPK-activating protein MP12)                | LEG1_HUMAN  | 14567  | 100% | 6  | 8  | 34  | 0.06% | 63.40% |
| DRO-p56 | (P09417) Dihydropteridine reductase (EC 1.5.1.34) (HDHPR) (Quinoid dihydropteridine reductase)                                                                                                                                                | DHPR_HUMAN  | 25786  | 100% | 2  | 3  | 5   | 0.01% | 23.80% |
| DRO-p56 | (P09429) High mobility group protein B1 (High mobility group protein 1) (HMG-1)                                                                                                                                                               | HMGB1_HUMAN | 24746  | 100% | 3  | 4  | 5   | 0.01% | 21.00% |
| DRO-p56 | (P09486) SPARC precursor (Secreted protein acidic and rich in cysteine) (Osteonectin) (ON) (Basement-membrane protein 40) (BM-40)                                                                                                             | SPRC_HUMAN  | 34614  | 100% | 10 | 13 | 54  | 0.10% | 41.90% |
| DRO-p56 | (P09661) U2 small nuclear ribonucleoprotein A' (U2 snRNP-A')                                                                                                                                                                                  | RU2A_HUMAN  | 28399  | 100% | 5  | 6  | 7   | 0.01% | 33.70% |
| DRO-p56 | (P09668) Cathepsin H precursor (EC 3.4.22.16) [Contains: Cathepsin H mini chain; Cathepsin H heavy chain; Cathepsin H light chain]                                                                                                            | CATH_HUMAN  | 37360  | 100% | 3  | 3  | 7   | 0.01% | 16.10% |
| DRO-p56 | (P09972) Fructose-bisphosphate aldolase C (EC 4.1.2.13) (Brain-type aldolase)                                                                                                                                                                 | ALDOC_HUMAN | 39307  | 100% | 3  | 5  | 16  | 0.03% | 22.30% |
| DRO-p56 | (P10253) Lysosomal alpha-glucosidase precursor (EC 3.2.1.20) (Acid maltase) (Aglucosidase alfa) [Contains: 76 kDa lysosomal alpha-glucosidase; 70 kDa lysosomal alpha-glucosidase]                                                            | LYAG_HUMAN  | 105321 | 100% | 16 | 22 | 136 | 0.26% | 30.60% |
| DRO-p56 | (P10619) Lysosomal protective protein precursor (EC 3.4.16.5) (Cathepsin A) (Carboxypeptidase C) (Protective protein for beta-galactosidase) [Contains: Lysosomal protective protein 32 kDa chain; Lysosomal protective protein 20 kDa chain] | PPGB_HUMAN  | 54450  | 100% | 6  | 8  | 30  | 0.06% | 19.80% |

## Protein Identified Sequence Coverage in DRO-1

|         |                                                                                                                                                                                                                                                     |             |        |      |    |    |     |       |        |
|---------|-----------------------------------------------------------------------------------------------------------------------------------------------------------------------------------------------------------------------------------------------------|-------------|--------|------|----|----|-----|-------|--------|
| DRO-p56 | (P10809) 60 kDa heat shock protein, mitochondrial precursor (Hsp60) (60 kDa chaperonin) (CPN60) (Heat shock protein 60) (HSP-60) (Mitochondrial matrix protein P1) (P60 lymphocyte protein) (HuCHA60)                                               | CH60_HUMAN  | 61038  | 100% | 9  | 13 | 57  | 0.11% | 31.10% |
| DRO-p56 | (P10915) Hyaluronan and proteoglycan link protein 1 precursor (Proteoglycan link protein) (Cartilage link protein) (LP)                                                                                                                             | HPLN1_HUMAN | 40148  | 100% | 5  | 5  | 10  | 0.02% | 26.80% |
| DRO-p56 | (P11021) 78 kDa glucose-regulated protein precursor (GRP 78) (Immunoglobulin heavy chain-binding protein) (BiP) (Endoplasmic reticulum luminal Ca(2+)-binding protein grp78)                                                                        | GRP78_HUMAN | 72317  | 100% | 27 | 35 | 291 | 0.55% | 46.00% |
| DRO-p56 | (P11047) Laminin gamma-1 chain precursor (Laminin B2 chain)                                                                                                                                                                                         | LAMC1_HUMAN | 177587 | 100% | 22 | 24 | 66  | 0.13% | 23.40% |
| DRO-p56 | (P11142) Heat shock cognate 71 kDa protein (Heat shock 70 kDa protein 8)                                                                                                                                                                            | HSP7C_HUMAN | 70882  | 100% | 15 | 16 | 69  | 0.13% | 39.50% |
| DRO-p56 | (P11279) Lysosome-associated membrane glycoprotein 1 precursor (LAMP-1) (CD107a antigen)                                                                                                                                                            | LAMP1_HUMAN | 44756  | 100% | 3  | 3  | 8   | 0.02% | 10.80% |
| DRO-p56 | (P12109) Collagen alpha-1(VI) chain precursor                                                                                                                                                                                                       | CO6A1_HUMAN | 108531 | 100% | 5  | 6  | 16  | 0.03% | 9.73%  |
| DRO-p56 | (P12110) Collagen alpha-2(VI) chain precursor                                                                                                                                                                                                       | CO6A2_HUMAN | 108557 | 100% | 3  | 3  | 3   | 0.01% | 4.12%  |
| DRO-p56 | (P12268) Inosine-5'-monophosphate dehydrogenase 2 (EC 1.1.1.205) (IMP dehydrogenase 2) (IMPDH-II) (IMPD 2)                                                                                                                                          | IMDH2_HUMAN | 55788  | 100% | 7  | 7  | 12  | 0.02% | 17.10% |
| DRO-p56 | (P12814) Alpha-actinin-1 (Alpha-actinin cytoskeletal isoform) (Non-muscle alpha-actinin-1) (F-actin cross linking protein)                                                                                                                          | ACTN1_HUMAN | 103043 | 100% | 3  | 4  | 7   | 0.01% | 13.70% |
| DRO-p56 | (P13010) ATP-dependent DNA helicase 2 subunit 2 (EC 3.6.1.-) (ATP-dependent DNA helicase II 80 kDa subunit) (Lupus Ku autoantigen protein p86) (Ku86) (Ku80) (86 kDa subunit of Ku antigen) (Thyroid-lupus autoantigen) (TLAA) (CTC box-binding fac | KU86_HUMAN  | 82558  | 100% | 2  | 2  | 6   | 0.01% | 5.75%  |
| DRO-p56 | (P13284) Gamma-interferon-inducible lysosomal thiol reductase precursor (Gamma-interferon-inducible protein IP-30)                                                                                                                                  | GILT_HUMAN  | 29131  | 100% | 2  | 3  | 7   | 0.01% | 21.10% |
| DRO-p56 | (P13473) Lysosome-associated membrane glycoprotein 2 precursor (LAMP-2) (CD107b antigen)                                                                                                                                                            | LAMP2_HUMAN | 44943  | 100% | 2  | 2  | 10  | 0.02% | 4.88%  |
| DRO-p56 | (P13611) Versican core protein precursor (Large fibroblast proteoglycan) (Chondroitin sulfate proteoglycan core protein 2) (PG-M) (Glial hyaluronate-binding protein) (GHAP)                                                                        | CSPG2_HUMAN | 372795 | 100% | 4  | 5  | 15  | 0.03% | 1.50%  |
| DRO-p56 | (P13639) Elongation factor 2 (EF-2)                                                                                                                                                                                                                 | EF2_HUMAN   | 95191  | 100% | 3  | 3  | 11  | 0.02% | 6.53%  |
| DRO-p56 | (P13667) Protein disulfide-isomerase A4 precursor (EC 5.3.4.1) (Protein ERp-72) (ERp72)                                                                                                                                                             | PDIA4_HUMAN | 72916  | 100% | 27 | 36 | 356 | 0.67% | 41.70% |
| DRO-p56 | (P13674) Prolyl 4-hydroxylase alpha-1 subunit precursor (EC 1.14.11.2) (4-PH alpha-1) (Procollagen-proline,2-oxoglutarate-4-dioxygenase alpha-1 subunit)                                                                                            | P4HA1_HUMAN | 61034  | 100% | 3  | 4  | 5   | 0.01% | 11.60% |
| DRO-p56 | (P13804) Electron transfer flavoprotein alpha-subunit, mitochondrial precursor (Alpha-ETF)                                                                                                                                                          | ETFHA_HUMAN | 35062  | 100% | 4  | 4  | 5   | 0.01% | 20.70% |

## Protein Identified Sequence Coverage in DRO-1

|         |                                                                                                                                                                                                                                                      |             |        |      |    |    |    |       |        |
|---------|------------------------------------------------------------------------------------------------------------------------------------------------------------------------------------------------------------------------------------------------------|-------------|--------|------|----|----|----|-------|--------|
| DRO-p56 | (P13987) CD59 glycoprotein precursor (Membrane attack complex inhibition factor) (MACIF) (MAC-inhibitory protein) (MAC-IP) (Protectin) (MEM43 antigen) (Membrane inhibitor of reactive lysis) (MIRL) (20 kDa homologous restriction factor) (HRF-20) | CD59_HUMAN  | 14159  | 100% | 5  | 5  | 13 | 0.02% | 37.50% |
| DRO-p56 | (P14174) Macrophage migration inhibitory factor (MIF) (Phenylpyruvate tautomerase) (EC 5.3.2.1) (Glycosylation-inhibiting factor) (GIF)                                                                                                              | MIF_HUMAN   | 12327  | 100% | 3  | 3  | 6  | 0.01% | 36.00% |
| DRO-p56 | (P14314) Glucosidase 2 beta subunit precursor (Glucosidase II beta subunit) (Protein kinase C substrate, 60.1 kDa protein, heavy chain) (PKCSH) (80K-H protein)                                                                                      | GLU2B_HUMAN | 59279  | 100% | 10 | 11 | 41 | 0.08% | 30.60% |
| DRO-p56 | (P14618) Pyruvate kinase isozymes M1/M2 (EC 2.7.1.40) (Pyruvate kinase muscle isozyme) (Cytosolic thyroid hormone-binding protein) (CTHBP) (THBP1)                                                                                                   | KPYM_HUMAN  | 57788  | 100% | 17 | 23 | 64 | 0.12% | 44.00% |
| DRO-p56 | (P14625) Endoplasmic precursor (Heat shock protein 90 kDa beta member 1) (94 kDa glucose-regulated protein) (GRP94) (gp96 homolog) (Tumor rejection antigen 1)                                                                                       | ENPL_HUMAN  | 92454  | 100% | 19 | 22 | 93 | 0.18% | 32.80% |
| DRO-p56 | (P15289) Arylsulfatase A precursor (EC 3.1.6.8) (ASA) (Cerebroside-sulfatase) [Contains: Arylsulfatase A component B; Arylsulfatase A component C]                                                                                                   | ARSA_HUMAN  | 53571  | 100% | 4  | 6  | 25 | 0.05% | 13.80% |
| DRO-p56 | (P15311) Ezrin (p81) (Cytovillin) (Villin-2)                                                                                                                                                                                                         | EZRI_HUMAN  | 69251  | 100% | 2  | 2  | 3  | 0.01% | 12.00% |
| DRO-p56 | (P15531) Nucleoside diphosphate kinase A (EC 2.7.4.6) (NDK A) (NDP kinase A) (Tumor metastatic process-associated protein) (Metastasis inhibition factor nm23) (nm23-H1) (Granzyme A-activated DNase) (GAAD)                                         | NDKA_HUMAN  | 17131  | 100% | 2  | 2  | 2  | 0.00% | 30.30% |
| DRO-p56 | (P15586) N-acetylglucosamine-6-sulfatase precursor (EC 3.1.6.14) (G6S) (Glucosamine-6-sulfatase)                                                                                                                                                     | GL6S_HUMAN  | 62066  | 100% | 12 | 14 | 52 | 0.10% | 29.50% |
| DRO-p56 | (P15880) 40S ribosomal protein S2 (S4) (LLRep3 protein)                                                                                                                                                                                              | RS2_HUMAN   | 31307  | 100% | 2  | 2  | 2  | 0.00% | 10.90% |
| DRO-p56 | (P16070) CD44 antigen precursor (Phagocytic glycoprotein I) (PGP-1) (HUTCH-I) (Extracellular matrix receptor-III) (ECMR-III) (GP90 lymphocyte homing/adhesion receptor) (Hermes antigen) (Hyaluronate receptor) (Heparan sulfate proteoglycan) (Epi  | CD44_HUMAN  | 81535  | 100% | 5  | 6  | 46 | 0.09% | 8.22%  |
| DRO-p56 | (P16112) Aggrecan core protein precursor (Cartilage specific proteoglycan core protein) (CSPCP) (Chondroitin sulfate proteoglycan core protein 1) [Contains: Aggrecan core protein 2]                                                                | PGCA_HUMAN  | 250168 | 100% | 4  | 5  | 10 | 0.02% | 3.40%  |
| DRO-p56 | (P16152) Carbonyl reductase [NADPH] 1 (EC 1.1.1.184) (NADPH-dependent carbonyl reductase 1) (Prostaglandin-E(2) 9-reductase) (EC 1.1.1.189) (Prostaglandin 9-ketoreductase) (15-hydroxyprostaglandin dehydrogenase [NADP+]) (EC 1.1.1.197)           | DHCA_HUMAN  | 30226  | 100% | 4  | 4  | 8  | 0.02% | 27.50% |
| DRO-p56 | (P16278) Beta-galactosidase precursor (EC 3.2.1.23) (Lactase) (Acid beta-galactosidase)                                                                                                                                                              | BGAL_HUMAN  | 76076  | 100% | 11 | 12 | 42 | 0.08% | 21.30% |

## Protein Identified Sequence Coverage in DRO-1

|         |                                                                                                                                                                                                                                                      |             |        |      |    |    |    |       |        |
|---------|------------------------------------------------------------------------------------------------------------------------------------------------------------------------------------------------------------------------------------------------------|-------------|--------|------|----|----|----|-------|--------|
| DRO-p56 | (P17050) Alpha-N-acetylgalactosaminidase precursor (EC 3.2.1.49) (Alpha-galactosidase B)                                                                                                                                                             | NAGAB_HUMAN | 46548  | 100% | 9  | 11 | 40 | 0.08% | 33.30% |
| DRO-p56 | (P17900) Ganglioside GM2 activator precursor (GM2-AP) (Cerebroside sulfate activator protein) (Shingolipid activator protein 3) (SAP-3) [Contains: Ganglioside GM2 activator isoform short]                                                          | SAP3_HUMAN  | 20805  | 100% | 2  | 3  | 15 | 0.03% | 28.00% |
| DRO-p56 | (P17931) Galectin-3 (Galactose-specific lectin 3) (Mac-2 antigen) (IgE-binding protein) (35 kDa lectin) (Carbohydrate-binding protein 35) (CBP 35) (Laminin-binding protein) (Lectin L-29) (L-31) (Galactoside-binding protein) (GALBP)              | LEG3_HUMAN  | 26040  | 100% | 5  | 5  | 12 | 0.02% | 24.10% |
| DRO-p56 | (P18669) Phosphoglycerate mutase 1 (EC 5.4.2.1) (EC 5.4.2.4) (EC 3.1.3.13) (Phosphoglycerate mutase isozyme B) (PGAM-B) (BPG-dependent PGAM 1)                                                                                                       | PGAM1_HUMAN | 28656  | 100% | 7  | 10 | 30 | 0.06% | 50.60% |
| DRO-p56 | (P19338) Nucleolin (Protein C23)                                                                                                                                                                                                                     | NUCL_HUMAN  | 76467  | 100% | 2  | 2  | 3  | 0.01% | 6.06%  |
| DRO-p56 | (P20618) Proteasome subunit beta type 1 (EC 3.4.25.1) (Proteasome component C5) (Macropain subunit C5) (Multicatalytic endopeptidase complex subunit C5) (Proteasome gamma chain)                                                                    | PSB1_HUMAN  | 26473  | 100% | 2  | 3  | 4  | 0.01% | 12.00% |
| DRO-p56 | (P21291) Cysteine and glycine-rich protein 1 (Cysteine-rich protein 1) (CRP1) (CRP)                                                                                                                                                                  | CSRP1_HUMAN | 20418  | 100% | 2  | 2  | 2  | 0.00% | 19.30% |
| DRO-p56 | (P22061) Protein-L-isoaspartate(D-aspartate) O-methyltransferase (EC 2.1.1.77) (Protein-beta-aspartate methyltransferase) (PIMT) (Protein L-isoaspartyl/D-aspartyl methyltransferase) (L-isoaspartyl protein carboxyl methyltransferase)             | PIMT_HUMAN  | 24502  | 100% | 2  | 2  | 5  | 0.01% | 23.50% |
| DRO-p56 | (P22234) Multifunctional protein ADE2 [Includes: Phosphoribosylaminoimidazole-succinocarboxamide synthase (EC 6.3.2.6) (SAICAR synthetase); Phosphoribosylaminoimidazole carboxylase (EC 4.1.1.21) (AIR carboxylase) (AIRC)]                         | PUR6_HUMAN  | 46931  | 100% | 9  | 9  | 34 | 0.06% | 27.60% |
| DRO-p56 | (P22314) Ubiquitin-activating enzyme E1 (A1S9 protein)                                                                                                                                                                                               | UBE1_HUMAN  | 117832 | 100% | 4  | 4  | 6  | 0.01% | 7.84%  |
| DRO-p56 | (P22392) Nucleoside diphosphate kinase B (EC 2.7.4.6) (NDK B) (NDP kinase B) (nm23-H2) (C-myc purine-binding transcription factor PUF)                                                                                                               | NDKB_HUMAN  | 17280  | 100% | 2  | 2  | 7  | 0.01% | 33.60% |
| DRO-p56 | (P23246) Splicing factor, proline- and glutamine-rich (Polypyrimidine tract-binding protein-associated splicing factor) (PTB-associated splicing factor) (PSF) (DNA-binding p52/p100 complex, 100 kDa subunit) (100-kDa DNA-pairing protein) (hpOMP) | SFPQ_HUMAN  | 76132  | 100% | 2  | 2  | 3  | 0.01% | 5.52%  |
| DRO-p56 | (P23284) Peptidyl-prolyl cis-trans isomerase B precursor (EC 5.2.1.8) (PPIase) (Rotamase) (Cyclophilin B) (S-cyclophilin) (SCYLP) (CYP-S1)                                                                                                           | PIIB_HUMAN  | 22725  | 100% | 9  | 9  | 46 | 0.09% | 39.40% |
| DRO-p56 | (P23381) Tryptophanyl-tRNA synthetase (EC 6.1.1.2) (Tryptophan--tRNA ligase) (TrpRS) (IFP53) (hWRS)                                                                                                                                                  | SYW_HUMAN   | 53150  | 100% | 10 | 13 | 45 | 0.09% | 40.80% |
| DRO-p56 | (P23396) 40S ribosomal protein S3                                                                                                                                                                                                                    | RS3_HUMAN   | 26671  | 100% | 5  | 5  | 11 | 0.02% | 30.50% |
| DRO-p56 | (P23528) Cofilin-1 (Cofilin, non-muscle isoform) (18 kDa phosphoprotein) (p18)                                                                                                                                                                       | COF1_HUMAN  | 18354  | 100% | 5  | 5  | 12 | 0.02% | 42.40% |

## Protein Identified Sequence Coverage in DRO-1

|         |                                                                                                                                                                                                                     |             |        |      |    |    |     |       |        |
|---------|---------------------------------------------------------------------------------------------------------------------------------------------------------------------------------------------------------------------|-------------|--------|------|----|----|-----|-------|--------|
| DRO-p56 | (P24821) Tenascin precursor (TN) (Hexabrachion) (Cytotactin) (Neuronectin) (GMEM) (JI) (Miotendinous antigen) (Glioma-associated-extracellular matrix antigen) (GP 150-225) (Tenascin-C) (TN-C)                     | TENA_HUMAN  | 240845 | 100% | 45 | 52 | 187 | 0.35% | 32.70% |
| DRO-p56 | (P25786) Proteasome subunit alpha type 1 (EC 3.4.25.1) (Proteasome component C2) (Macropain subunit C2) (Multicatalytic endopeptidase complex subunit C2) (Proteasome nu chain) (30 kDa prosomal protein) (PROS-30) | PSA1_HUMAN  | 29538  | 100% | 2  | 2  | 3   | 0.01% | 14.10% |
| DRO-p56 | (P25788) Proteasome subunit alpha type 3 (EC 3.4.25.1) (Proteasome component C8) (Macropain subunit C8) (Multicatalytic endopeptidase complex subunit C8)                                                           | PSA3_HUMAN  | 28285  | 100% | 4  | 4  | 18  | 0.03% | 17.70% |
| DRO-p56 | (P26038) Moesin (Membrane-organizing extension spike protein)                                                                                                                                                       | MOES_HUMAN  | 67673  | 100% | 7  | 9  | 30  | 0.06% | 15.60% |
| DRO-p56 | (P26640) Valyl-tRNA synthetase (EC 6.1.1.9) (Valine-tRNA ligase) (ValRS) (Protein G7a)                                                                                                                              | SYV_HUMAN   | 140460 | 100% | 2  | 2  | 3   | 0.01% | 3.80%  |
| DRO-p56 | (P26641) Elongation factor 1-gamma (EF-1-gamma) (eEF-1B gamma)                                                                                                                                                      | EF1G_HUMAN  | 49970  | 100% | 11 | 11 | 38  | 0.07% | 36.20% |
| DRO-p56 | (P26885) FK506-binding protein 2 precursor (EC 5.2.1.8) (Peptidyl-prolyl cis-trans isomerase) (PPIase) (Rotamase) (13 kDa FKBP) (FKBP-13)                                                                           | FKBP2_HUMAN | 15632  | 100% | 3  | 4  | 6   | 0.01% | 38.70% |
| DRO-p56 | (P27105) Erythrocyte band 7 integral membrane protein (Stomatin) (Protein 7.2b)                                                                                                                                     | STOM_HUMAN  | 31583  | 100% | 4  | 4  | 11  | 0.02% | 28.60% |
| DRO-p56 | (P27348) 14-3-3 protein theta (14-3-3 protein tau) (14-3-3 protein T-cell) (HS1 protein)                                                                                                                            | 1433T_HUMAN | 27747  | 100% | 4  | 5  | 6   | 0.01% | 27.80% |
| DRO-p56 | (P27695) DNA-(apurinic or apyrimidinic site) lyase (EC 4.2.99.18) (AP endonuclease 1) (APEX nuclease) (APEN) (REF-1 protein)                                                                                        | APEX1_HUMAN | 35407  | 100% | 2  | 2  | 6   | 0.01% | 12.30% |
| DRO-p56 | (P27797) Calreticulin precursor (CRP55) (Calregulin) (HACBP) (ERp60) (grp60)                                                                                                                                        | CRTC_HUMAN  | 48125  | 100% | 12 | 15 | 79  | 0.15% | 44.60% |
| DRO-p56 | (P27824) Calnexin precursor (Major histocompatibility complex class I antigen-binding protein p88) (p90) (IP90)                                                                                                     | CALX_HUMAN  | 67552  | 100% | 2  | 2  | 5   | 0.01% | 5.24%  |
| DRO-p56 | (P28066) Proteasome subunit alpha type 5 (EC 3.4.25.1) (Proteasome zeta chain) (Macropain zeta chain) (Multicatalytic endopeptidase complex zeta chain)                                                             | PSA5_HUMAN  | 26393  | 100% | 3  | 4  | 5   | 0.01% | 22.00% |
| DRO-p56 | (P28070) Proteasome subunit beta type 4 precursor (EC 3.4.25.1) (Proteasome beta chain) (Macropain beta chain) (Multicatalytic endopeptidase complex beta chain) (Proteasome chain 3) (HSN3) (HsBPROS26)            | PSB4_HUMAN  | 29175  | 100% | 2  | 2  | 2   | 0.00% | 17.40% |
| DRO-p56 | (P29401) Transketolase (EC 2.2.1.1) (TK)                                                                                                                                                                            | TKT_HUMAN   | 67861  | 100% | 9  | 12 | 61  | 0.12% | 30.20% |
| DRO-p56 | (P30038) Delta-1-pyrroline-5-carboxylate dehydrogenase, mitochondrial precursor (EC 1.5.1.12) (P5C dehydrogenase) (Aldehyde dehydrogenase 4A1)                                                                      | AL4A1_HUMAN | 61702  | 100% | 2  | 2  | 2   | 0.00% | 8.88%  |
| DRO-p56 | (P30040) Endoplasmic reticulum protein ERp29 precursor (ERp31) (ERp28)                                                                                                                                              | ERP29_HUMAN | 28977  | 100% | 9  | 10 | 40  | 0.08% | 51.70% |

## Protein Identified Sequence Coverage in DRO-1

|         |                                                                                                                                                                                                                                                    |             |       |      |    |    |     |       |        |
|---------|----------------------------------------------------------------------------------------------------------------------------------------------------------------------------------------------------------------------------------------------------|-------------|-------|------|----|----|-----|-------|--------|
| DRO-p56 | (P30041) Peroxiredoxin-6 (EC 1.11.1.15) (Antioxidant protein 2) (1-Cys peroxiredoxin) (1-Cys PRX) (Acidic calcium-independent phospholipase A2) (EC 3.1.1.-) (aiPLA2) (Non-selenium glutathione peroxidase) (EC 1.11.1.7) (NSGPx) (24 kDa protein) | PRDX6_HUMAN | 24887 | 100% | 8  | 10 | 31  | 0.06% | 47.10% |
| DRO-p56 | (P30043) Flavin reductase (EC 1.5.1.30) (FR) (NADPH-dependent diaphorase) (NADPH-flavin reductase) (FLR) (Biliverdin reductase B) (EC 1.3.1.24) (BVR-B) (Biliverdin-IX beta-reductase) (Green heme-binding protein) (GHBP)                         | BLVRB_HUMAN | 21970 | 100% | 2  | 2  | 2   | 0.00% | 23.90% |
| DRO-p56 | (P30044) Peroxiredoxin-5, mitochondrial precursor (EC 1.11.1.15) (Prx-V) (Peroxisomal antioxidant enzyme) (PLP) (Thioredoxin reductase) (Thioredoxin peroxidase PMP20) (Antioxidant enzyme B166) (AOEB166) (TPx type VI) (Liver tissue 2D-page spo | PRDX5_HUMAN | 22008 | 100% | 4  | 4  | 20  | 0.04% | 28.00% |
| DRO-p56 | (P30050) 60S ribosomal protein L12                                                                                                                                                                                                                 | RL12_HUMAN  | 17801 | 100% | 5  | 6  | 24  | 0.05% | 45.50% |
| DRO-p56 | (P30101) Protein disulfide-isomerase A3 precursor (EC 5.3.4.1) (Disulfide isomerase ER-60) (ERp60) (58 kDa microsomal protein) (p58) (ERp57) (58 kDa glucose-regulated protein)                                                                    | PDIA3_HUMAN | 56767 | 100% | 20 | 23 | 132 | 0.25% | 49.10% |
| DRO-p56 | (P30533) Alpha-2-macroglobulin receptor-associated protein precursor (Alpha-2-MRAP) (Low density lipoprotein receptor-related protein-associated protein 1) (RAP)                                                                                  | AMRP_HUMAN  | 41450 | 100% | 2  | 2  | 2   | 0.00% | 8.12%  |
| DRO-p56 | (P31946) 14-3-3 protein beta/alpha (Protein kinase C inhibitor protein 1) (KCIP-1) (Protein 1054)                                                                                                                                                  | 1433B_HUMAN | 27934 | 100% | 6  | 7  | 20  | 0.04% | 41.60% |
| DRO-p56 | (P32119) Peroxiredoxin-2 (EC 1.11.1.15) (Thioredoxin peroxidase 1) (Thioredoxin-dependent peroxide reductase 1) (Thiol-specific antioxidant protein) (TSA) (PRP) (Natural killer cell-enhancing factor B) (NKEF-B)                                 | PRDX2_HUMAN | 21743 | 100% | 2  | 3  | 6   | 0.01% | 9.14%  |
| DRO-p56 | (P34059) N-acetylgalactosamine-6-sulfatase precursor (EC 3.1.6.4) (N-acetylgalactosamine-6-sulfate sulfatase) (Galactose-6-sulfate sulfatase) (GalNAc6S sulfatase) (Chondroitinsulfatase) (Chondroitinase)                                         | GA6S_HUMAN  | 58009 | 100% | 2  | 3  | 14  | 0.03% | 7.66%  |
| DRO-p56 | (P35052) Glypican-1 precursor                                                                                                                                                                                                                      | GPC1_HUMAN  | 61633 | 100% | 2  | 2  | 2   | 0.00% | 8.06%  |
| DRO-p56 | (P35237) Serpin B6 (Placental thrombin inhibitor) (Cytoplasmic antiproteinase) (CAP) (Protease inhibitor 6) (PI-6)                                                                                                                                 | SPB6_HUMAN  | 42573 | 100% | 3  | 3  | 5   | 0.01% | 11.70% |
| DRO-p56 | (P35268) 60S ribosomal protein L22 (Epstein-Barr virus small RNA-associated protein) (EBER-associated protein) (EAP) (Heparin-binding protein HBp15)                                                                                               | RL22_HUMAN  | 14638 | 100% | 3  | 3  | 10  | 0.02% | 39.40% |
| DRO-p56 | (P35527) Keratin, type I cytoskeletal 9 (Cytokeratin-9) (CK-9) (Keratin-9) (K9)                                                                                                                                                                    | K1C9_HUMAN  | 62113 | 100% | 4  | 5  | 8   | 0.02% | 14.90% |
| DRO-p56 | (P35613) Basigin precursor (Leukocyte activation antigen M6) (Collagenase stimulatory factor) (Extracellular matrix metalloproteinase inducer) (EMMPRIN) (5F7) (Tumor cell-derived collagenase stimulatory factor) (TCSF) (OK blood group antigen) | BASI_HUMAN  | 42182 | 100% | 2  | 2  | 3   | 0.01% | 12.70% |



## Protein Identified Sequence Coverage in DRO-1

|         |                                                                                                                                                                                                                                                      |             |        |      |    |    |    |       |        |
|---------|------------------------------------------------------------------------------------------------------------------------------------------------------------------------------------------------------------------------------------------------------|-------------|--------|------|----|----|----|-------|--------|
| DRO-p56 | (P36543) Vacuolar ATP synthase subunit E (EC 3.6.3.14) (V-ATPase E subunit) (Vacuolar proton pump E subunit) (V-ATPase 31 kDa subunit) (P31)                                                                                                         | VATE_HUMAN  | 26128  | 100% | 2  | 2  | 2  | 0.00% | 11.90% |
| DRO-p56 | (P36578) 60S ribosomal protein L4 (L1)                                                                                                                                                                                                               | RL4_HUMAN   | 47550  | 100% | 5  | 6  | 14 | 0.03% | 20.00% |
| DRO-p56 | (P37108) Signal recognition particle 14 kDa protein (SRP14) (18 kDa Alu RNA-binding protein)                                                                                                                                                         | SRP14_HUMAN | 14527  | 100% | 2  | 2  | 8  | 0.02% | 31.60% |
| DRO-p56 | (P37802) Transgelin-2 (SM22-alpha homolog)                                                                                                                                                                                                           | TAGL2_HUMAN | 22243  | 100% | 3  | 3  | 16 | 0.03% | 27.80% |
| DRO-p56 | (P37837) Transaldolase (EC 2.2.1.2)                                                                                                                                                                                                                  | TALDO_HUMAN | 37524  | 100% | 6  | 6  | 13 | 0.02% | 19.00% |
| DRO-p56 | (P39019) 40S ribosomal protein S19                                                                                                                                                                                                                   | RS19_HUMAN  | 15911  | 100% | 2  | 2  | 6  | 0.01% | 15.30% |
| DRO-p56 | (P40227) T-complex protein 1 subunit zeta (TCP-1-zeta) (CCT-zeta) (CCT-zeta-1) (Tcp20) (HTR3) (Acute morphine dependence-related protein 2)                                                                                                          | TCPZ_HUMAN  | 57876  | 100% | 6  | 7  | 18 | 0.03% | 25.10% |
| DRO-p56 | (P40925) Malate dehydrogenase, cytoplasmic (EC 1.1.1.37) (Cytosolic malate dehydrogenase)                                                                                                                                                            | MDHC_HUMAN  | 36278  | 100% | 4  | 4  | 7  | 0.01% | 19.20% |
| DRO-p56 | (P40926) Malate dehydrogenase, mitochondrial precursor (EC 1.1.1.37)                                                                                                                                                                                 | MDHM_HUMAN  | 35514  | 100% | 4  | 5  | 15 | 0.03% | 21.00% |
| DRO-p56 | (P41250) Glycyl-tRNA synthetase (EC 6.1.1.14) (Glycine--tRNA ligase) (GlyRS)                                                                                                                                                                         | SYG_HUMAN   | 83124  | 100% | 4  | 4  | 5  | 0.01% | 8.25%  |
| DRO-p56 | (P42785) Lysosomal Pro-X carboxypeptidase precursor (EC 3.4.16.2) (Prolylcarboxypeptidase) (PRCP) (Proline carboxypeptidase) (Angiotensinase C) (Lysosomal carboxypeptidase C)                                                                       | PCP_HUMAN   | 55783  | 100% | 2  | 3  | 4  | 0.01% | 8.06%  |
| DRO-p56 | (P43121) Cell surface glycoprotein MUC18 precursor (Melanoma-associated antigen MUC18) (Melanoma cell adhesion molecule) (Melanoma-associated antigen A32) (S-endo 1 endothelial-associated antigen) (Cell surface glycoprotein P1H12) (CD146 anti   | MUC18_HUMAN | 71589  | 100% | 5  | 5  | 12 | 0.02% | 12.40% |
| DRO-p56 | (P43358) Melanoma-associated antigen 4 (MAGE-4 antigen) (MAGE-X2) (MAGE-41)                                                                                                                                                                          | MAGA4_HUMAN | 34911  | 100% | 5  | 5  | 11 | 0.02% | 18.60% |
| DRO-p56 | (P43490) Nicotinamide phosphoribosyltransferase (EC 2.4.2.12) (NAMPRase) (Nampt) (Pre-B cell-enhancing factor) (Pre-B-cell colony-enhancing factor 1) (Visfatin)                                                                                     | NAMPT_HUMAN | 55505  | 100% | 12 | 15 | 44 | 0.08% | 43.40% |
| DRO-p56 | (P46976) Glycogenin-1 (EC 2.4.1.186)                                                                                                                                                                                                                 | GLYG_HUMAN  | 39235  | 100% | 2  | 2  | 12 | 0.02% | 11.70% |
| DRO-p56 | (P47755) F-actin capping protein alpha-2 subunit (CapZ alpha-2)                                                                                                                                                                                      | CAZA2_HUMAN | 32800  | 100% | 6  | 8  | 17 | 0.03% | 33.30% |
| DRO-p56 | (P48643) T-complex protein 1 subunit epsilon (TCP-1-epsilon) (CCT-epsilon)                                                                                                                                                                           | TCPE_HUMAN  | 59654  | 100% | 5  | 5  | 11 | 0.02% | 20.90% |
| DRO-p56 | (P48960) CD97 antigen precursor (Leukocyte antigen CD97)                                                                                                                                                                                             | CD97_HUMAN  | 91852  | 100% | 2  | 3  | 3  | 0.01% | 3.71%  |
| DRO-p56 | (P49327) Fatty acid synthase (EC 2.3.1.85) [Includes: [Acyl-carrier-protein] S-acetyltransferase (EC 2.3.1.38); [Acyl-carrier-protein] S-malonyltransferase (EC 2.3.1.39); 3-oxoacyl-[acyl-carrier-protein] synthase (EC 2.3.1.41); 3-oxoacyl-[acyl- | FAS_HUMAN   | 273382 | 100% | 3  | 3  | 4  | 0.01% | 2.39%  |
| DRO-p56 | (P49419) Aldehyde dehydrogenase family 7 member A1 (EC 1.2.1.3) (Antiquitin-1)                                                                                                                                                                       | AL7A1_HUMAN | 55217  | 100% | 4  | 4  | 4  | 0.01% | 11.80% |

## Protein Identified Sequence Coverage in DRO-1

|         |                                                                                                                                                                                                                                                     |                |       |      |    |    |     |       |        |
|---------|-----------------------------------------------------------------------------------------------------------------------------------------------------------------------------------------------------------------------------------------------------|----------------|-------|------|----|----|-----|-------|--------|
| DRO-p56 | (P50395) Rab GDP dissociation inhibitor beta (Rab GDI beta) (Guanosine diphosphate dissociation inhibitor 2) (GDI-2)                                                                                                                                | GDIB_HUMAN     | 50648 | 100% | 5  | 7  | 22  | 0.04% | 21.10% |
| DRO-p56 | (P50897) Palmitoyl-protein thioesterase 1 precursor (EC 3.1.2.22) (Palmitoyl-protein hydrolase 1)                                                                                                                                                   | PPT1_HUMAN     | 34176 | 100% | 4  | 5  | 15  | 0.03% | 24.20% |
| DRO-p56 | (P50991) T-complex protein 1 subunit delta (TCP-1-delta) (CCT-delta) (Stimulator of TAR RNA-binding)                                                                                                                                                | TCPD_HUMAN     | 57777 | 100% | 3  | 3  | 7   | 0.01% | 11.00% |
| DRO-p56 | (P51665) 26S proteasome non-ATPase regulatory subunit 7 (26S proteasome regulatory subunit rpn8) (26S proteasome regulatory subunit S12) (Proteasome subunit p40) (Mov34 protein homolog)                                                           | PSD7_HUMAN     | 37008 | 100% | 3  | 3  | 10  | 0.02% | 19.40% |
| DRO-p56 | (P52209) 6-phosphogluconate dehydrogenase, decarboxylating (EC 1.1.1.44)                                                                                                                                                                            | 6PGD_HUMAN     | 52993 | 100% | 3  | 3  | 11  | 0.02% | 10.60% |
| DRO-p56 | (P52272) Heterogeneous nuclear ribonucleoprotein M (hnRNP M)                                                                                                                                                                                        | HNRPM_HUMAN    | 77368 | 100% | 3  | 3  | 4   | 0.01% | 8.92%  |
| DRO-p56 | (P52306) Rap1 GTPase-GDP dissociation stimulator 1 (SMG P21 stimulatory GDP/GTP exchange protein) (SMG GDS protein) (Exchange factor smgGDS)                                                                                                        | GDS1_HUMAN     | 66386 | 100% | 2  | 2  | 2   | 0.00% | 7.74%  |
| DRO-p56 | (P52565) Rho GDP-dissociation inhibitor 1 (Rho GDI 1) (Rho-GDI alpha)                                                                                                                                                                               | GDIR_HUMAN     | 23058 | 100% | 4  | 4  | 7   | 0.01% | 22.70% |
| DRO-p56 | (P52907) F-actin capping protein alpha-1 subunit (CapZ alpha-1)                                                                                                                                                                                     | CAZA1_HUMAN    | 32774 | 100% | 4  | 6  | 12  | 0.02% | 35.10% |
| DRO-p56 | (P53367) Arfaptin-1 (ADP-ribosylation factor-interacting protein 1)                                                                                                                                                                                 | ARFP1_HUMAN    | 41722 | 100% | 2  | 3  | 5   | 0.01% | 7.24%  |
| DRO-p56 | (P53634) Dipeptidyl-peptidase 1 precursor (EC 3.4.14.1) (Dipeptidyl-peptidase I) (DPP-I) (DPPI) (Cathepsin C) (Cathepsin J) (Dipeptidyl transferase) [Contains: Dipeptidyl-peptidase 1 exclusion domain chain (Dipeptidyl-peptidase I exclusion dom | CATC_HUMAN     | 51824 | 100% | 4  | 6  | 13  | 0.02% | 16.40% |
| DRO-p56 | (P54577) Tyrosyl-tRNA synthetase, cytoplasmic (EC 6.1.1.1) (Tyrosyl--tRNA ligase) (TyrRS)                                                                                                                                                           | SYYC_HUMAN     | 58996 | 100% | 3  | 3  | 5   | 0.01% | 5.50%  |
| DRO-p56 | (P55145) ARMET protein precursor (Arginine-rich protein)                                                                                                                                                                                            | ARMET_HUMAN    | 20240 | 100% | 5  | 6  | 38  | 0.07% | 32.40% |
| DRO-p56 | (P55209) Nucleosome assembly protein 1-like 1 (NAP-1-related protein) (hNRP)                                                                                                                                                                        | NP1L1_HUMAN    | 45357 | 100% | 3  | 3  | 8   | 0.02% | 17.10% |
| DRO-p56 | (P55327) Tumor protein D52 (N8 protein)                                                                                                                                                                                                             | TPD52_HUMAN    | 19845 | 100% | 7  | 11 | 45  | 0.09% | 64.10% |
| DRO-p56 | (P59998) Actin-related protein 2/3 complex subunit 4 (ARP2/3 complex 20 kDa subunit) (p20-ARC)                                                                                                                                                      | ARPC4_HUMAN    | 19518 | 100% | 2  | 2  | 3   | 0.01% | 13.20% |
| DRO-p56 | (P60174) Triosephosphate isomerase (EC 5.3.1.1) (TIM) (Triose-phosphate isomerase)                                                                                                                                                                  | TPIS_HUMAN     | 26520 | 100% | 12 | 14 | 63  | 0.12% | 66.90% |
| DRO-p56 | (P60709) Actin, cytoplasmic 1 (Beta-actin)                                                                                                                                                                                                          | ACTB_HUMAN,ACT | 41776 | 100% | 13 | 19 | 114 | 0.22% | 53.30% |
| DRO-p56 | (P60866) 40S ribosomal protein S20                                                                                                                                                                                                                  | RS20_HUMAN     | 13355 | 100% | 2  | 2  | 5   | 0.01% | 19.30% |
| DRO-p56 | (P61247) 40S ribosomal protein S3a                                                                                                                                                                                                                  | RS3A_HUMAN     | 29796 | 100% | 2  | 2  | 2   | 0.00% | 9.51%  |
| DRO-p56 | (P61289) Proteasome activator complex subunit 3 (Proteasome activator 28-gamma subunit) (PA28gamma) (PA28g) (Activator of multicatalytic protease subunit 3) (11S regulator complex gamma subunit) (REG-gamma) (Ki nuclear autoantigen)             | PSME3_HUMAN    | 29489 | 100% | 5  | 6  | 20  | 0.04% | 27.20% |

## Protein Identified Sequence Coverage in DRO-1

|         |                                                                                                                                                                |                |       |      |    |    |    |       |        |
|---------|----------------------------------------------------------------------------------------------------------------------------------------------------------------|----------------|-------|------|----|----|----|-------|--------|
| DRO-p56 | (P61353) 60S ribosomal protein L27                                                                                                                             | RL27_HUMAN     | 15649 | 100% | 3  | 4  | 4  | 0.01% | 30.40% |
| DRO-p56 | (P61586) Transforming protein RhoA precursor (H12)                                                                                                             | RHOA_HUMAN     | 21750 | 100% | 2  | 2  | 3  | 0.01% | 28.00% |
| DRO-p56 | (P61916) Epididymal secretory protein E1 precursor (Niemann-Pick disease type C2 protein) (hE1)                                                                | NPC2_HUMAN     | 16552 | 100% | 3  | 4  | 19 | 0.04% | 37.10% |
| DRO-p56 | (P61978) Heterogeneous nuclear ribonucleoprotein K (hnRNP K) (Transformation up-regulated nuclear protein) (TUNP)                                              | HNRPK_HUMAN    | 50961 | 100% | 2  | 2  | 3  | 0.01% | 8.64%  |
| DRO-p56 | (P61981) 14-3-3 protein gamma (Protein kinase C inhibitor protein 1) (KCIP-1)                                                                                  | 1433G_HUMAN    | 28154 | 100% | 5  | 6  | 17 | 0.03% | 32.50% |
| DRO-p56 | (P62081) 40S ribosomal protein S7                                                                                                                              | RS7_HUMAN      | 22110 | 100% | 3  | 4  | 23 | 0.04% | 32.50% |
| DRO-p56 | (P62191) 26S protease regulatory subunit 4 (P26s4) (Proteasome 26S subunit ATPase 1)                                                                           | PRS4_HUMAN     | 49168 | 100% | 2  | 2  | 2  | 0.00% | 9.32%  |
| DRO-p56 | (P62258) 14-3-3 protein epsilon (14-3-3E)                                                                                                                      | 1433E_HUMAN    | 29157 | 100% | 13 | 15 | 79 | 0.15% | 56.50% |
| DRO-p56 | (P62263) 40S ribosomal protein S14                                                                                                                             | RS14_HUMAN     | 16124 | 100% | 2  | 3  | 4  | 0.01% | 22.70% |
| DRO-p56 | (P62277) 40S ribosomal protein S13                                                                                                                             | RS13_HUMAN     | 17074 | 100% | 2  | 2  | 11 | 0.02% | 16.70% |
| DRO-p56 | (P62314) Small nuclear ribonucleoprotein Sm D1 (snRNP core protein D1) (Sm-D1) (Sm-D autoantigen)                                                              | SMD1_HUMAN     | 13264 | 100% | 2  | 3  | 14 | 0.03% | 27.70% |
| DRO-p56 | (P62424) 60S ribosomal protein L7a (Surfeit locus protein 3) (PLA-X polypeptide)                                                                               | RL7A_HUMAN     | 29847 | 100% | 4  | 5  | 14 | 0.03% | 15.10% |
| DRO-p56 | (P62750) 60S ribosomal protein L23a                                                                                                                            | RL23A_HUMAN    | 17678 | 100% | 4  | 4  | 11 | 0.02% | 28.20% |
| DRO-p56 | (P62805) Histone H4                                                                                                                                            | H4_HUMAN       | 11219 | 100% | 3  | 3  | 9  | 0.02% | 31.40% |
| DRO-p56 | (P62807) Histone H2B.a/g/h/k/l (H2B.1 A) (H2B/a) (H2B/g) (H2B/h) (H2B/k) (H2B/l)                                                                               | H2BA_HUMAN,H2B | 13773 | 100% | 2  | 2  | 27 | 0.05% | 19.20% |
| DRO-p56 | (P62826) GTP-binding nuclear protein Ran (GTPase Ran) (Ras-like protein TC4) (Androgen receptor-associated protein 24)                                         | RAN_HUMAN      | 24274 | 100% | 3  | 3  | 6  | 0.01% | 14.90% |
| DRO-p56 | (P62888) 60S ribosomal protein L30                                                                                                                             | RL30_HUMAN     | 12636 | 100% | 3  | 3  | 6  | 0.01% | 35.10% |
| DRO-p56 | (P62937) Peptidyl-prolyl cis-trans isomerase A (EC 5.2.1.8) (PPIase A) (Rotamase A) (Cyclophilin A) (Cyclosporin A-binding protein)                            | PPIA_HUMAN     | 17864 | 100% | 10 | 11 | 79 | 0.15% | 67.10% |
| DRO-p56 | (P62942) FK506-binding protein 1A (EC 5.2.1.8) (Peptidyl-prolyl cis-trans isomerase) (PPIase) (Rotamase) (12 kDa FKBP) (FKBP-12) (Immunophilin FKBP12)         | FKB1A_HUMAN    | 11802 | 100% | 2  | 2  | 6  | 0.01% | 25.20% |
| DRO-p56 | (P62988) Ubiquitin                                                                                                                                             | UBIQ_HUMAN     | 8547  | 100% | 2  | 2  | 9  | 0.02% | 32.90% |
| DRO-p56 | (P63104) 14-3-3 protein zeta/delta (Protein kinase C inhibitor protein 1) (KCIP-1)                                                                             | 1433Z_HUMAN    | 27728 | 100% | 8  | 10 | 60 | 0.11% | 42.90% |
| DRO-p56 | (P63241) Eukaryotic translation initiation factor 5A-1 (eIF-5A-1) (eIF-5A1) (Eukaryotic initiation factor 5A isoform 1) (eIF-5A) (eIF-4D) (Rev-binding factor) | IF5A1_HUMAN    | 16684 | 100% | 2  | 2  | 4  | 0.01% | 22.90% |
| DRO-p56 | (P68032) Actin, alpha cardiac (Alpha-cardiac actin)                                                                                                            | ACTC_HUMAN     | 42002 | 100% | 3  | 3  | 11 | 0.02% | 29.40% |
| DRO-p56 | (P68104) Elongation factor 1-alpha 1 (EF-1-alpha-1) (Elongation factor 1 A-1) (eEF1A-1) (Elongation factor Tu) (EF-Tu)                                         | EF1A1_HUMAN    | 50123 | 100% | 10 | 13 | 46 | 0.09% | 39.00% |
| DRO-p56 | (P68363) Tubulin alpha-ubiquitous chain (Alpha-tubulin ubiquitous) (Tubulin K-alpha-1)                                                                         | TBAK_HUMAN     | 50134 | 100% | 10 | 12 | 31 | 0.06% | 39.20% |
| DRO-p56 | (P68371) Tubulin beta-2C chain (Tubulin beta-2 chain)                                                                                                          | TBB2C_HUMAN    | 49813 | 100% | 4  | 4  | 11 | 0.02% | 57.10% |
| DRO-p56 | (P68871) Hemoglobin beta subunit (Hemoglobin beta chain) (Beta-globin)                                                                                         | HBB_HUMAN,HBD  | 15906 | 100% | 2  | 2  | 2  | 0.00% | 13.00% |

## Protein Identified Sequence Coverage in DRO-1

|         |                                                                                                                                                                                                                                                   |                |        |      |    |    |     |       |        |
|---------|---------------------------------------------------------------------------------------------------------------------------------------------------------------------------------------------------------------------------------------------------|----------------|--------|------|----|----|-----|-------|--------|
| DRO-p56 | (P78330) Phosphoserine phosphatase (EC 3.1.3.3) (PSP) (O-phosphoserine phosphohydrolase) (PSPase) (L-3-phosphoserine phosphatase)                                                                                                                 | SERB_HUMAN     | 24990  | 100% | 2  | 2  | 2   | 0.00% | 9.78%  |
| DRO-p56 | (P78371) T-complex protein 1 subunit beta (TCP-1-beta) (CCT-beta)                                                                                                                                                                                 | TCPB_HUMAN     | 57341  | 100% | 2  | 2  | 5   | 0.01% | 7.68%  |
| DRO-p56 | (P84077) ADP-ribosylation factor 1                                                                                                                                                                                                                | ARF1_HUMAN,ARF | 20453  | 100% | 6  | 6  | 9   | 0.02% | 53.90% |
| DRO-p56 | (Q01518) Adenylyl cyclase-associated protein 1 (CAP 1)                                                                                                                                                                                            | CAP1_HUMAN     | 51524  | 100% | 7  | 8  | 23  | 0.04% | 32.50% |
| DRO-p56 | (Q02750) Dual specificity mitogen-activated protein kinase kinase 1 (EC 2.7.12.2) (MAP kinase kinase 1) (MAPKK 1) (ERK activator kinase 1) (MAPK/ERK kinase 1) (MEK1)                                                                             | MP2K1_HUMAN    | 43291  | 100% | 2  | 2  | 2   | 0.00% | 9.69%  |
| DRO-p56 | (Q02809) Procollagen-lysine,2-oxoglutarate 5-dioxygenase 1 precursor (EC 1.14.11.4) (Lysyl hydroxylase 1) (LH1)                                                                                                                                   | PLOD1_HUMAN    | 83535  | 100% | 20 | 24 | 106 | 0.20% | 37.30% |
| DRO-p56 | (Q02878) 60S ribosomal protein L6 (TAX-responsive enhancer element-binding protein 107) (TAXREB107) (Neoplasm-related protein C140)                                                                                                               | RL6_HUMAN      | 32580  | 100% | 2  | 2  | 2   | 0.00% | 9.76%  |
| DRO-p56 | (Q07020) 60S ribosomal protein L18                                                                                                                                                                                                                | RL18_HUMAN     | 21486  | 100% | 3  | 3  | 16  | 0.03% | 19.80% |
| DRO-p56 | (Q08380) Galectin-3-binding protein precursor (Lectin galactoside-binding soluble 3-binding protein) (Mac-2-binding protein) (Mac-2 BP) (MAC2BP) (Tumor-associated antigen 90K)                                                                   | LG3BP_HUMAN    | 65314  | 100% | 4  | 4  | 4   | 0.01% | 12.30% |
| DRO-p56 | (Q09666) Neuroblast differentiation-associated protein AHNAK (Desmoyokin) (Fragments)                                                                                                                                                             | AHNK_HUMAN     | 312479 | 100% | 5  | 5  | 5   | 0.01% | 2.84%  |
| DRO-p56 | (Q13126) S-methyl-5-thioadenosine phosphorylase (EC 2.4.2.28) (5'-methylthioadenosine phosphorylase) (MTA phosphorylase) (MTAPase)                                                                                                                | MTAP_HUMAN     | 31232  | 100% | 5  | 5  | 12  | 0.02% | 33.20% |
| DRO-p56 | (Q13162) Peroxiredoxin-4 (EC 1.11.1.15) (Prx-IV) (Thioredoxin peroxidase AO372) (Thioredoxin-dependent peroxide reductase A0372) (Antioxidant enzyme AOE372) (AOE37-2)                                                                            | PRDX4_HUMAN    | 30523  | 100% | 2  | 2  | 3   | 0.01% | 14.80% |
| DRO-p56 | (Q13200) 26S proteasome non-ATPase regulatory subunit 2 (26S proteasome regulatory subunit RPN1) (26S proteasome regulatory subunit S2) (26S proteasome subunit p97) (Tumor necrosis factor type 1 receptor-associated protein 2) (55.11 protein) | PSD2_HUMAN     | 100184 | 100% | 2  | 2  | 2   | 0.00% | 4.07%  |
| DRO-p56 | (Q13510) Acid ceramidase precursor (EC 3.5.1.23) (Acylsphingosine deacylase) (N-acylsphingosine amidohydrolase) (AC) (Putative 32 kDa heart protein) (PHP32) [Contains: Acid ceramidase alpha subunit; Acid ceramidase beta subunit]              | ASAH1_HUMAN    | 44633  | 100% | 3  | 3  | 17  | 0.03% | 10.60% |
| DRO-p56 | (Q13596) Sorting nexin-1                                                                                                                                                                                                                          | SNX1_HUMAN     | 59053  | 100% | 3  | 3  | 5   | 0.01% | 8.43%  |
| DRO-p56 | (Q14257) Reticulocalbin-2 precursor (Calcium-binding protein ERC-55) (E6-binding protein) (E6BP)                                                                                                                                                  | RCN2_HUMAN     | 36860  | 100% | 9  | 9  | 19  | 0.04% | 42.90% |
| DRO-p56 | (Q14696) Mesoderm development candidate 2 (NY-REN-61 antigen)                                                                                                                                                                                     | MESD2_HUMAN    | 26060  | 100% | 2  | 2  | 4   | 0.01% | 10.70% |

## Protein Identified Sequence Coverage in DRO-1

|         |                                                                                                                                                                                                                                                   |                |        |      |    |    |     |       |        |
|---------|---------------------------------------------------------------------------------------------------------------------------------------------------------------------------------------------------------------------------------------------------|----------------|--------|------|----|----|-----|-------|--------|
| DRO-p56 | (Q14697) Neutral alpha-glucosidase AB precursor (EC 3.2.1.84) (Glucosidase II alpha subunit)                                                                                                                                                      | GANAB_HUMAN    | 106858 | 100% | 9  | 10 | 26  | 0.05% | 16.00% |
| DRO-p56 | (Q14764) Major vault protein (MVP) (Lung resistance-related protein)                                                                                                                                                                              | MVP_HUMAN      | 99177  | 100% | 15 | 18 | 42  | 0.08% | 30.40% |
| DRO-p56 | (Q14974) Importin beta-1 subunit (Karyopherin beta-1 subunit) (Nuclear factor P97) (Importin 90)                                                                                                                                                  | IMB1_HUMAN     | 97153  | 100% | 2  | 2  | 12  | 0.02% | 5.37%  |
| DRO-p56 | (Q14993) Collagen alpha-1(XIX) chain precursor (Collagen alpha-1(Y) chain)                                                                                                                                                                        | COJA1_HUMAN    | 115206 | 100% | 3  | 3  | 7   | 0.01% | 4.20%  |
| DRO-p56 | (Q15084) Protein disulfide-isomerase A6 precursor (EC 5.3.4.1) (Protein disulfide isomerase P5) (Thioredoxin domain-containing protein 7)                                                                                                         | PDIA6_HUMAN    | 48104  | 100% | 11 | 17 | 88  | 0.17% | 43.60% |
| DRO-p56 | (Q15233) Non-POU domain-containing octamer-binding protein (NonO protein) (54 kDa nuclear RNA- and DNA-binding protein) (p54(nrb)) (p54nrb) (55 kDa nuclear protein) (NMT55) (DNA-binding p52/p100 complex, 52 kDa subunit)                       | NONO_HUMAN     | 54214  | 100% | 2  | 3  | 6   | 0.01% | 12.50% |
| DRO-p56 | (Q15293) Reticulocalbin-1 precursor                                                                                                                                                                                                               | RCN1_HUMAN     | 38873  | 100% | 8  | 8  | 25  | 0.05% | 33.20% |
| DRO-p56 | (Q15365) Poly(rC)-binding protein 1 (Alpha-CP1) (hnRNP-E1) (Nucleic acid-binding protein SUB2.3)                                                                                                                                                  | PCBP1_HUMAN    | 37480  | 100% | 4  | 5  | 7   | 0.01% | 22.20% |
| DRO-p56 | (Q15366) Poly(rC)-binding protein 2 (Alpha-CP2) (hnRNP-E2)                                                                                                                                                                                        | PCBP2_HUMAN    | 38563  | 100% | 2  | 2  | 2   | 0.00% | 15.30% |
| DRO-p56 | (Q15631) Translin                                                                                                                                                                                                                                 | TSN_HUMAN      | 26165  | 100% | 3  | 3  | 7   | 0.01% | 20.60% |
| DRO-p56 | (Q15691) Microtubule-associated protein RP/EB family member 1 (APC-binding protein EB1) (End-binding protein 1) (EB1)                                                                                                                             | MARE1_HUMAN    | 29850  | 100% | 2  | 2  | 2   | 0.00% | 14.60% |
| DRO-p56 | (Q15758) Neutral amino acid transporter B(0) (ATB(0)) (Sodium-dependent neutral amino acid transporter type 2) (RD114/simian type D retrovirus receptor) (Baboon M7 virus receptor)                                                               | AAAT_HUMAN     | 56582  | 100% | 2  | 2  | 2   | 0.00% | 5.73%  |
| DRO-p56 | (Q16363) Laminin alpha-4 chain precursor                                                                                                                                                                                                          | LAMA4_HUMAN    | 202512 | 100% | 15 | 17 | 41  | 0.08% | 14.20% |
| DRO-p56 | (Q16531) DNA damage-binding protein 1 (Damage-specific DNA-binding protein 1) (UV-damaged DNA-binding factor) (DDB p127 subunit) (DDBa) (UV-damaged DNA-binding protein 1) (UV-DDB 1) (Xeroderma pigmentosum group E-complementing protein) (XPc) | DDB1_HUMAN     | 126952 | 100% | 2  | 2  | 2   | 0.00% | 4.74%  |
| DRO-p56 | (Q16555) Dihydropyrimidinase-related protein 2 (DRP-2) (Collapsin response mediator protein 2) (CRMP-2) (N2A3)                                                                                                                                    | DPYL2_HUMAN    | 62276  | 100% | 2  | 2  | 2   | 0.00% | 9.09%  |
| DRO-p56 | (Q16610) Extracellular matrix protein 1 precursor (Secretory component p85)                                                                                                                                                                       | ECM1_HUMAN     | 60655  | 100% | 19 | 22 | 82  | 0.16% | 57.40% |
| DRO-p56 | (Q16658) Fascin (Singed-like protein) (55 kDa actin bundling protein) (p55)                                                                                                                                                                       | FSCN1_HUMAN    | 54381  | 100% | 3  | 3  | 4   | 0.01% | 11.00% |
| DRO-p56 | (Q6F113) Histone H2A type 2-A (H2A.2)                                                                                                                                                                                                             | H2A2A_HUMAN,H2 | 13840  | 100% | 2  | 4  | 27  | 0.05% | 44.50% |
| DRO-p56 | (Q6NZI2) Polymerase I and transcript release factor (PTRF protein)                                                                                                                                                                                | PTRF_HUMAN     | 43459  | 100% | 2  | 2  | 2   | 0.00% | 8.46%  |
| DRO-p56 | (Q6UVK1) Chondroitin sulfate proteoglycan 4 precursor (Chondroitin sulfate proteoglycan NG2) (Melanoma chondroitin sulfate proteoglycan) (Melanoma-associated chondroitin sulfate proteoglycan)                                                   | CSPG4_HUMAN    | 250476 | 100% | 63 | 81 | 348 | 0.66% | 43.30% |
| DRO-p56 | (Q71UI9) Histone H2AV (H2A.F/Z)                                                                                                                                                                                                                   | H2AV_HUMAN,H2A | 13404  | 100% | 2  | 2  | 5   | 0.01% | 29.90% |

## Protein Identified Sequence Coverage in DRO-1

|         |                                                                                                                                                                                                                  |             |         |      |    |    |     |       |        |
|---------|------------------------------------------------------------------------------------------------------------------------------------------------------------------------------------------------------------------|-------------|---------|------|----|----|-----|-------|--------|
| DRO-p56 | (Q86YB8) ERO1-like protein beta precursor (EC 1.8.4.-) (ERO1-Lbeta) (Oxidoreductin-1-Lbeta) (Endoplasmic oxidoreductin-1-like protein B)                                                                         | ERO1B_HUMAN | 53511   | 100% | 7  | 7  | 21  | 0.04% | 24.00% |
| DRO-p56 | (Q8N474) Secreted frizzled-related protein 1 precursor (sFRP-1) (Frizzled-related protein 1) (FRP-1) (Secreted apoptosis-related protein 2) (SARP-2)                                                             | SFRP1_HUMAN | 35368   | 100% | 2  | 2  | 2   | 0.00% | 11.10% |
| DRO-p56 | (Q8NB7) Sulfatase-modifying factor 2 precursor (C-alpha-formylglycine-generating enzyme 2)                                                                                                                       | SUMF2_HUMAN | 33839   | 100% | 10 | 11 | 44  | 0.08% | 47.20% |
| DRO-p56 | (Q8NBK3) Sulfatase-modifying factor 1 precursor (C-alpha-formylglycine-generating enzyme 1)                                                                                                                      | SUMF1_HUMAN | 40538   | 100% | 2  | 2  | 3   | 0.01% | 7.49%  |
| DRO-p56 | (Q8NBS9) Thioredoxin domain-containing protein 5 precursor (Thioredoxin-like protein p46) (Endoplasmic reticulum protein ERp46)                                                                                  | TXND5_HUMAN | 47611   | 100% | 5  | 5  | 7   | 0.01% | 22.00% |
| DRO-p56 | (Q8WZ42) Titin (EC 2.7.11.1) (Connectin) (Rhabdomyosarcoma antigen MU-RMS-40.14)                                                                                                                                 | TITIN_HUMAN | 3815832 | 100% | 2  | 2  | 3   | 0.01% | 0.04%  |
| DRO-p56 | (Q92598) Heat-shock protein 105 kDa (Heat shock 110 kDa protein) (Antigen NY-CO-25)                                                                                                                              | HS105_HUMAN | 96848   | 100% | 2  | 2  | 2   | 0.00% | 4.20%  |
| DRO-p56 | (Q92820) Gamma-glutamyl hydrolase precursor (EC 3.4.19.9) (Gamma-Glu-X carboxypeptidase) (Conjugase) (GH)                                                                                                        | GGH_HUMAN   | 35948   | 100% | 9  | 12 | 72  | 0.14% | 38.70% |
| DRO-p56 | (Q969H8) Protein C19orf10 precursor (Stromal cell-derived growth factor SF20) (Interleukin-25) (IL-25)                                                                                                           | CS010_HUMAN | 18777   | 100% | 2  | 2  | 2   | 0.00% | 15.60% |
| DRO-p56 | (Q969P0) Immunoglobulin superfamily member 8 precursor (CD81 partner 3) (Glu-Trp-Ile EWI motif containing protein 2) (EWI-2) (Keratinocytes-associated transmembrane protein 4) (KCT-4) (LIR-D1) (CD316 antigen) | IGSF8_HUMAN | 65015   | 100% | 5  | 6  | 10  | 0.02% | 17.00% |
| DRO-p56 | (Q96AY3) FK506-binding protein 10 precursor (EC 5.2.1.8) (Peptidyl-prolyl cis-trans isomerase) (PPIase) (Rotamase) (65 kDa FK506-binding protein) (FKBP65) (Immunophilin FKBP65)                                 | FKB10_HUMAN | 64228   | 100% | 16 | 18 | 63  | 0.12% | 41.60% |
| DRO-p56 | (Q96CG8) Collagen triple helix repeat-containing protein 1 precursor (NMTC1 protein)                                                                                                                             | CTHR1_HUMAN | 26207   | 100% | 6  | 6  | 25  | 0.05% | 35.00% |
| DRO-p56 | (Q96D15) Reticulocalbin-3 precursor (EF-hand calcium-binding protein RLP49)                                                                                                                                      | RCN3_HUMAN  | 37475   | 100% | 8  | 8  | 31  | 0.06% | 47.30% |
| DRO-p56 | (Q96HE7) ERO1-like protein alpha precursor (EC 1.8.4.-) (ERO1-Lalpha) (Oxidoreductin-1-Lalpha) (Endoplasmic oxidoreductin-1-like protein) (ERO1-L)                                                               | ERO1A_HUMAN | 54377   | 100% | 21 | 27 | 137 | 0.26% | 62.40% |
| DRO-p56 | (Q99497) Protein DJ-1 (Oncogene DJ1)                                                                                                                                                                             | PARK7_HUMAN | 19873   | 100% | 2  | 2  | 4   | 0.01% | 31.70% |
| DRO-p56 | (Q99519) Sialidase-1 precursor (EC 3.2.1.18) (Lysosomal sialidase) (N-acetyl-alpha-neuraminidase 1) (Acetylneuraminyl hydrolase) (G9 sialidase)                                                                  | NEUR1_HUMAN | 45449   | 100% | 3  | 3  | 5   | 0.01% | 15.90% |
| DRO-p56 | (Q99538) Legumain precursor (EC 3.4.22.34) (Asparaginyl endopeptidase) (Protease, cysteine 1)                                                                                                                    | LGMN_HUMAN  | 49393   | 100% | 5  | 6  | 20  | 0.04% | 21.00% |
| DRO-p56 | (Q99733) Nucleosome assembly protein 1-like 4 (Nucleosome assembly protein 2) (NAP2)                                                                                                                             | NP1L4_HUMAN | 42806   | 100% | 4  | 4  | 6   | 0.01% | 18.70% |

## Protein Identified Sequence Coverage in DRO-1

|         |                                                                                                                                                                                                                                         |             |        |      |    |    |    |       |        |
|---------|-----------------------------------------------------------------------------------------------------------------------------------------------------------------------------------------------------------------------------------------|-------------|--------|------|----|----|----|-------|--------|
| DRO-p56 | (Q99988) Growth/differentiation factor 15 precursor (GDF-15) (Placental bone morphogenic protein) (Placental TGF-beta) (Macrophage inhibitory cytokine 1) (MIC-1) (Prostate differentiation factor) (NSAID-regulated protein 1) (NRG-1) | GDF15_HUMAN | 34151  | 100% | 5  | 6  | 27 | 0.05% | 25.30% |
| DRO-p56 | (Q9BS26) Thioredoxin domain-containing protein 4 precursor (Endoplasmic reticulum resident protein ERp44)                                                                                                                               | TXND4_HUMAN | 46955  | 100% | 4  | 4  | 10 | 0.02% | 22.40% |
| DRO-p56 | (Q9BWD1) Acetyl-CoA acetyltransferase, cytosolic (EC 2.3.1.9) (Cytosolic acetoacetyl-CoA thiolase) (Acetyl CoA transferase-like protein)                                                                                                | THIC_HUMAN  | 41332  | 100% | 4  | 4  | 4  | 0.01% | 23.40% |
| DRO-p56 | (Q9H173) Nucleotide exchange factor SIL1 precursor (BiP-associated protein) (BAP)                                                                                                                                                       | SIL1_HUMAN  | 52068  | 100% | 4  | 4  | 6  | 0.01% | 12.10% |
| DRO-p56 | (Q9HAT2) Sialate O-acetyltransferase precursor (EC 3.1.1.53) (Sialic acid-specific 9-O-acetyltransferase) (H-Lse)                                                                                                                       | SIAE_HUMAN  | 58297  | 100% | 2  | 2  | 8  | 0.02% | 8.41%  |
| DRO-p56 | (Q9HDC9) Adipocyte plasma membrane-associated protein (BSCV protein)                                                                                                                                                                    | APMAP_HUMAN | 46464  | 100% | 3  | 3  | 7  | 0.01% | 14.90% |
| DRO-p56 | (Q9NTK5) Putative GTP-binding protein PTD004                                                                                                                                                                                            | PTD4_HUMAN  | 44727  | 100% | 2  | 2  | 2  | 0.00% | 7.07%  |
| DRO-p56 | (Q9NVD7) Alpha-parvin (Calponin-like integrin-linked kinase-binding protein) (CH-ILKBP)                                                                                                                                                 | PARVA_HUMAN | 42227  | 100% | 3  | 3  | 4  | 0.01% | 9.41%  |
| DRO-p56 | (Q9NY33) Dipeptidyl-peptidase 3 (EC 3.4.14.4) (Dipeptidyl-peptidase III) (DPP III) (Dipeptidyl aminopeptidase III) (Dipeptidyl arylamidase III)                                                                                         | DPP3_HUMAN  | 82574  | 100% | 2  | 3  | 3  | 0.01% | 6.24%  |
| DRO-p56 | (Q9NYU2) UDP-glucose:glycoprotein glucosyltransferase 1 precursor (EC 2.4.1.-) (UDP-glucose ceramide glucosyltransferase-like 1) (UDP-Glc:glycoprotein glucosyltransferase) (HUGT1)                                                     | UGGG1_HUMAN | 174965 | 100% | 8  | 8  | 15 | 0.03% | 10.70% |
| DRO-p56 | (Q9UBE0) Ubiquitin-like 1-activating enzyme E1A (SUMO-1-activating enzyme subunit 1)                                                                                                                                                    | ULE1A_HUMAN | 38432  | 100% | 2  | 2  | 2  | 0.00% | 12.10% |
| DRO-p56 | (Q9UBG0) Macrophage mannose receptor 2 precursor (Urokinase receptor-associated protein) (Endocytic receptor 180) (CD280 antigen)                                                                                                       | MRC2_HUMAN  | 166637 | 100% | 10 | 10 | 22 | 0.04% | 14.10% |
| DRO-p56 | (Q9UBP6) tRNA (guanine-N(7)-)-methyltransferase (EC 2.1.1.33) (tRNA(m7G46)-methyltransferase) (Methyltransferase-like protein 1)                                                                                                        | TRMB_HUMAN  | 31454  | 100% | 3  | 3  | 11 | 0.02% | 25.70% |
| DRO-p56 | (Q9UBR2) Cathepsin Z precursor (EC 3.4.22.-) (Cathepsin X) (Cathepsin P)                                                                                                                                                                | CATZ_HUMAN  | 33850  | 100% | 7  | 9  | 29 | 0.05% | 48.80% |
| DRO-p56 | (Q9UBS4) DnaJ homolog subfamily B member 11 precursor (ER-associated dnaJ protein 3) (ErJ3) (ER-associated Hsp40 co-chaperone) (hDj9) (PWP1-interacting protein 4)                                                                      | DNJBB_HUMAN | 40497  | 100% | 5  | 5  | 11 | 0.02% | 22.30% |
| DRO-p56 | (Q9UHG3) Prenylcysteine oxidase precursor (EC 1.8.3.5) (PCL1)                                                                                                                                                                           | PCYOX_HUMAN | 56595  | 100% | 2  | 2  | 3  | 0.01% | 8.71%  |
| DRO-p56 | (Q9UHL4) Dipeptidyl-peptidase 2 precursor (EC 3.4.14.2) (Dipeptidyl-peptidase II) (DPP II) (Dipeptidyl aminopeptidase II) (Quiescent cell proline dipeptidase) (Dipeptidyl peptidase 7)                                                 | DPP2_HUMAN  | 54311  | 100% | 12 | 14 | 52 | 0.10% | 38.60% |

## Protein Identified Sequence Coverage in DRO-1

|         |                                                                                                                                                                      |             |        |      |    |    |     |       |        |
|---------|----------------------------------------------------------------------------------------------------------------------------------------------------------------------|-------------|--------|------|----|----|-----|-------|--------|
| DRO-p56 | (Q9UNW1) Multiple inositol polyphosphate phosphatase 1 precursor (EC 3.1.3.62) (Inositol (1,3,4,5)-tetrakisphosphate 3-phosphatase) (Ins(1,3,4,5)P(4) 3-phosphatase) | MINP1_HUMAN | 55035  | 100% | 3  | 3  | 5   | 0.01% | 9.45%  |
| DRO-p56 | (Q9UQ80) Proliferation-associated protein 2G4 (Cell cycle protein p38-2G4 homolog) (hG4-1) (ErbB3-binding protein 1)                                                 | PA2G4_HUMAN | 43638  | 100% | 2  | 2  | 2   | 0.00% | 6.36%  |
| DRO-p56 | (Q9Y224) Protein C14orf166                                                                                                                                           | CN166_HUMAN | 28051  | 100% | 6  | 8  | 25  | 0.05% | 36.50% |
| DRO-p56 | (Q9Y2B0) MIR-interacting saposin-like protein precursor (Transmembrane protein 4) (Putative secreted protein ZSIG9)                                                  | MSAP_HUMAN  | 20635  | 100% | 2  | 2  | 6   | 0.01% | 25.80% |
| DRO-p56 | (Q9Y2G5) GDP-fucose protein O-fucosyltransferase 2 precursor (EC 2.4.1.221) (Peptide-O-fucosyltransferase) (O-FucT-2)                                                | OFUT2_HUMAN | 49959  | 100% | 7  | 8  | 23  | 0.04% | 21.00% |
| DRO-p56 | (Q9Y3B3) Transmembrane emp24 domain-containing protein 7 precursor                                                                                                   | TMED7_HUMAN | 25154  | 100% | 2  | 2  | 5   | 0.01% | 14.70% |
| DRO-p56 | (Q9Y4L1) 150 kDa oxygen-regulated protein precursor (Orp150) (Hypoxia up-regulated 1)                                                                                | OXRP_HUMAN  | 111319 | 100% | 37 | 52 | 412 | 0.78% | 53.90% |
| DRO-p56 | (Q9Y5X3) Sorting nexin-5                                                                                                                                             | SNX5_HUMAN  | 46800  | 100% | 3  | 3  | 9   | 0.02% | 9.90%  |
| DRO-p56 | (Q9Y625) Glypican-6 precursor                                                                                                                                        | GPC6_HUMAN  | 62718  | 100% | 4  | 4  | 9   | 0.02% | 15.30% |
| DRO-p56 | (Q9Y696) Chloride intracellular channel protein 4 (Intracellular chloride ion channel protein p64H1)                                                                 | CLIC4_HUMAN | 28624  | 100% | 3  | 4  | 6   | 0.01% | 23.00% |
| DRO-p56 | (Q9Y6C2) EMILIN-1 precursor (Elastin microfibril interface-located protein 1) (Elastin microfibril interfacier 1)                                                    | EMIL1_HUMAN | 106677 | 100% | 17 | 21 | 58  | 0.11% | 26.40% |
| DRO-p56 | (Q9Y6N7) Roundabout homolog 1 precursor (H-Robo-1) (Deleted in U twenty twenty)                                                                                      | ROBO1_HUMAN | 180910 | 100% | 2  | 2  | 2   | 0.00% | 1.94%  |
