# Supplementary material
Source: PubMed Central journal article supplement (PMC2735218)
Supplement: NIHMS132564-supplement-6_si_006.pdf [file NIHMS132564-supplement-6_si_006.pdf]

# List of Glycoprotein Identified

## Glycoproteins Identified in 5 Thyroid Cancer Cell-lines

\*\* Results for Protein Atlas (<http://www.proteinatlas.org/index.php>)

Immunohistochemical results are listed as (-) no staining or negative, (+) weak staining, (++) moderate staining, (+++) strong staining; (?) uncertain Western blot results

A blank cell indicates that information/spectrum is unavailable or undetected

(\*) in the column name "Glycosylation" denotes a glycoprotein

| Swiss-Prot Accession Number | ARO-p65 Spectra Counts | ARO-p67 Spectra Counts | DRO-p54 Spectra Counts | DRO-p56 Spectra Counts | XTC-p13 Spectra Counts | XTC-p29 Spectra Counts | TPC-p13 Spectra Counts | TPC-p15 Spectra Counts | FTC-p16 Spectra Counts | FTC-p17 Spectra Counts | **Human Proteome IHC (Thyroid gland) | **Human Proteome IHC- Thyroid Cancer | Protein Name                                                                                                                                                                                             | Subcellular location                                                                                                                                                                                      | Glycosylation | #Trans-membrane regions | Cd Antigen Name |
|-----------------------------|------------------------|------------------------|------------------------|------------------------|------------------------|------------------------|------------------------|------------------------|------------------------|------------------------|--------------------------------------|--------------------------------------|----------------------------------------------------------------------------------------------------------------------------------------------------------------------------------------------------------|-----------------------------------------------------------------------------------------------------------------------------------------------------------------------------------------------------------|---------------|-------------------------|-----------------|
| P11166                      | 44                     | 16                     |                        |                        |                        |                        | 5                      |                        | 22                     |                        | +/?                                  | +/?                                  | Solute carrier family 2, facilitated glucose transporter member 1, Glucose transporter type 1, erythrocyte/brain, GLUT-1, HepG2 glucose transporter                                                      | Cell membrane, Multi-pass membrane protein, Melanosome, Localizes primarily at the cell surface (By similarity). Identified by mass spectrometry in melanosome fractions from stage I to stage IV.        | *             | 12                      |                 |
| O15118                      |                        |                        |                        |                        | 5                      | 1                      |                        |                        |                        |                        |                                      |                                      | Niemann-Pick C1 protein                                                                                                                                                                                  | Late endosome membrane, Multi-pass membrane protein, Lysosome membrane, Multi-pass membrane protein                                                                                                       | *             | 11                      |                 |
| Q15758                      | 16                     | 6                      | 6                      |                        | 2                      |                        | 6                      | 6                      | 8                      |                        |                                      |                                      | Neutral amino acid transporter B(0), ATB(0), Sodium dependent neutral amino acid transporter type 2, RD114/simian type D retrovirus receptor, Baboon M7 virus receptor, Solute carrier family 1 member 5 | Membrane, Multi-pass membrane protein, Melanosome, Identified by mass spectrometry in melanosome fractions from stage I to stage IV.                                                                      | *             | 10                      |                 |
| Q8IWA5                      |                        |                        |                        |                        | 10                     | 10                     |                        |                        |                        |                        | -/?                                  | +/?                                  | Choline transporter-like protein 2, Solute carrier family 44 member 2                                                                                                                                    | Membrane, Multi-pass membrane protein                                                                                                                                                                     | *             | 10                      |                 |
| P48960                      | 3                      | 2                      |                        |                        | 9                      |                        |                        |                        | 10                     |                        | +                                    | ++                                   | CD97 antigen, Leukocyte antigen CD97                                                                                                                                                                     | Cell membrane, Multi-pass membrane protein, Secreted, Extracellular space                                                                                                                                 | *             | 7                       | CD97            |
| Q8IZP9                      |                        |                        |                        |                        | 6                      | 14                     |                        |                        |                        |                        | -/?                                  | -/?                                  | G-protein coupled receptor 64, Epididymis-specific protein 6, He6 receptor                                                                                                                               | Cell membrane, Multi-pass membrane protein                                                                                                                                                                | *             | 7                       |                 |
| Q8NFJ5                      |                        |                        |                        |                        | 13                     | 3                      |                        |                        |                        |                        | +++/?                                | ++/?                                 | Retinoic acid-induced protein 3, G-protein coupled receptor family C group 5 member A, Retinoic acid-induced gene 1 protein, RAIG-1, Orphan G-protein-coupling receptor PEIG-1                           | Cell membrane, Multi-pass membrane protein, Cytoplasmic vesicle membrane, Multi-pass membrane protein, Localized in the plasma membrane and perinuclear vesicles.                                         | *             | 7                       |                 |
| Q8TCT9                      |                        |                        |                        |                        |                        | 29                     |                        |                        |                        |                        |                                      |                                      | Minor histocompatibility antigen H13, Signal peptide peptidase, Presenilin-like protein 3, hIMP1 protein                                                                                                 | Endoplasmic reticulum membrane, Multi-pass membrane protein                                                                                                                                               | *             | 7                       |                 |
| O43490                      | 3                      | 3                      |                        |                        |                        |                        |                        |                        |                        |                        | ++/?                                 | ++/?                                 | Prominin-1, Prominin-like protein 1, Antigen AC133                                                                                                                                                       | Apical cell membrane, Multi-pass membrane protein, Cell projection, Microvillus membrane, Multi-pass membrane protein                                                                                     | *             | 5                       | CD133           |
| Q08722                      | 12                     |                        |                        |                        |                        |                        |                        |                        |                        |                        | -/?                                  | +/?                                  | Leukocyte surface antigen CD47, Integrin-associated protein, IAP, Antigenic surface determinant protein OA3, Protein MER6                                                                                | Cell membrane, Multi-pass membrane protein                                                                                                                                                                | *             | 5                       | CD47            |
| O60635                      | 5                      |                        |                        |                        |                        |                        |                        |                        |                        |                        |                                      |                                      | Tetraspanin-1, Tspan-1, Tetraspan NET-1, Tetraspanin TM4-C                                                                                                                                               | Membrane, Multi-pass membrane protein                                                                                                                                                                     | *             | 4                       |                 |
| O60637                      | 6                      |                        |                        |                        |                        |                        |                        |                        |                        |                        | +++/?                                | ++/?                                 | Tetraspanin-3, Tspan-3, Transmembrane 4 superfamily member 8, Tetraspanin TM4-A                                                                                                                          | Membrane, Multi-pass membrane protein                                                                                                                                                                     | *             | 4                       |                 |
| O95858                      | 5                      |                        |                        |                        |                        |                        |                        |                        |                        |                        |                                      |                                      | Tetraspanin-15, Tspan-15, Transmembrane 4 superfamily member 15, Tetraspan NET-7                                                                                                                         | Membrane, Multi-pass membrane protein                                                                                                                                                                     | *             | 4                       |                 |
| P08962                      | 23                     | 10                     | 26                     |                        | 27                     | 63                     |                        |                        | 17                     |                        | +                                    | +                                    | CD63 antigen, Melanoma-associated antigen ME491, Ocular melanoma-associated antigen, OMA81H, Granulophysin, Tetraspanin-30, Tspan-30, Lysosomal-associated membrane protein 3, Lamp-3                    | Cell membrane, Multi-pass membrane protein, Lysosome membrane, Multi-pass membrane protein, Late endosome membrane, Multi-pass membrane protein, Also found in Weibel-Palade bodies of endothelial cells. | *             | 4                       | CD63            |
| P19075                      | 66                     | 40                     |                        |                        |                        |                        |                        |                        |                        |                        |                                      |                                      | Tetraspanin-8, Tspan-8, Transmembrane 4 superfamily member 3, Tumor-associated antigen CO-029                                                                                                            | Membrane, Multi-pass membrane protein                                                                                                                                                                     | *             | 4                       |                 |
| P21926                      | 12                     | 20                     |                        |                        | 8                      | 56                     | 9                      |                        | 18                     |                        | ++                                   | +++                                  | CD9 antigen, p24, Leukocyte antigen MIC3, Motility-related protein, MRP-1, Tetraspanin-29, Tspan-29, 5H9 antigen, Cell growth-inhibiting gene 2 protein                                                  | Membrane, Multi-pass membrane protein                                                                                                                                                                     | *             | 4                       | CD9             |
| P27701                      | 2                      |                        |                        |                        |                        |                        |                        |                        |                        |                        | -/?                                  | -/?                                  | CD82 antigen, Inducible membrane protein R2, C33 antigen, IA4, Metastasis suppressor Kangai 1, Suppressor of tumorigenicity-6, Tetraspanin-27, Tspan-27                                                  | Membrane, Multi-pass membrane protein                                                                                                                                                                     | *             | 4                       | CD82            |
| P48509                      | 4                      |                        |                        |                        |                        |                        | 21                     | 17                     |                        |                        | +                                    | ++/+++                               | CD151 antigen, Platelet-endothelial tetraspanin antigen 3, PETA-3, GP27, Membrane glycoprotein SFA-1, Tetraspanin-24, Tspan-24                                                                           | Membrane, Multi-pass membrane protein                                                                                                                                                                     | *             | 4                       | CD151           |
| Q04941                      |                        |                        |                        |                        |                        |                        |                        |                        | 6                      |                        |                                      |                                      | Proteolipid protein 2, Intestinal membrane A4 protein, Differentiation-dependent protein A4                                                                                                              | Membrane, Multi-pass membrane protein                                                                                                                                                                     | *             | 4                       |                 |

## List of Glycoprotein Identified

|        |    |    |    |    |    |    |    |    |       |       |                                                                                                                                                                                                    |                                                                                                                                                                                                                                                                                                                                                                                                                                                                                                                                                                                                                                                                                                                                                                                                                                                                                                                                                                                                                                                                                                                |   |   |        |
|--------|----|----|----|----|----|----|----|----|-------|-------|----------------------------------------------------------------------------------------------------------------------------------------------------------------------------------------------------|----------------------------------------------------------------------------------------------------------------------------------------------------------------------------------------------------------------------------------------------------------------------------------------------------------------------------------------------------------------------------------------------------------------------------------------------------------------------------------------------------------------------------------------------------------------------------------------------------------------------------------------------------------------------------------------------------------------------------------------------------------------------------------------------------------------------------------------------------------------------------------------------------------------------------------------------------------------------------------------------------------------------------------------------------------------------------------------------------------------|---|---|--------|
| Q16563 | 4  |    |    |    |    |    |    |    | ++/?  | ++/?  | Synaptophysin-like protein 1, Pantophysin                                                                                                                                                          | Cytoplasmic vesicle membrane, Multi-pass membrane protein, Melanosome, Cytoplasmic transport vesicles (By similarity). Identified by mass spectrometry in melanosome fractions from stage I to stage IV.                                                                                                                                                                                                                                                                                                                                                                                                                                                                                                                                                                                                                                                                                                                                                                                                                                                                                                       | * | 4 |        |
| P04844 |    |    | 11 | 15 | 2  |    | 6  |    | +++   | +++   | Dolichyl-diphosphooligosaccharide-protein glycosyltransferase subunit 2, Dolichyl-diphosphooligosaccharide-protein glycosyltransferase 63 kDa subunit, Ribophorin-2, Ribophorin II, RPN-II, RIBIIR | Endoplasmic reticulum membrane, Multi-pass membrane protein                                                                                                                                                                                                                                                                                                                                                                                                                                                                                                                                                                                                                                                                                                                                                                                                                                                                                                                                                                                                                                                    | * | 3 |        |
| Q14108 | 8  | 4  |    |    |    |    |    |    | +++/? | +++/? | Lysosome membrane protein 2, Lysosome membrane protein II, LIMP II, Scavenger receptor class B member 2, 85 kDa lysosomal membrane sialoglycoprotein, LGP85, CD36 antigen-like 2                   | Lysosome membrane, Multi-pass membrane protein                                                                                                                                                                                                                                                                                                                                                                                                                                                                                                                                                                                                                                                                                                                                                                                                                                                                                                                                                                                                                                                                 | * | 2 | CD36   |
| O14672 | 47 | 30 |    |    |    | 21 | 21 | 27 | +/?   | +/?   | ADAM 10, A disintegrin and metalloproteinase domain 10, Mammalian disintegrin-metalloprotease, Kuzbanian protein homolog, CDw156                                                                   | Cell membrane, Single-pass type I membrane protein, Intracytoplasmic membrane, Single-pass type I membrane protein, Is localized in the plasma membrane but is predominantly expressed in the Golgi apparatus and in released membrane vesicles derived likely from the Golgi.                                                                                                                                                                                                                                                                                                                                                                                                                                                                                                                                                                                                                                                                                                                                                                                                                                 | * | 1 | CD156c |
| O14786 |    |    |    |    |    |    | 9  |    | +/?   | +/?   | Neuropilin-1, Vascular endothelial cell growth factor 165 receptor                                                                                                                                 | Cell membrane, Single-pass type I membrane protein, Secreted                                                                                                                                                                                                                                                                                                                                                                                                                                                                                                                                                                                                                                                                                                                                                                                                                                                                                                                                                                                                                                                   | * | 1 | CD304  |
| O15031 | 21 | 36 |    |    | 6  | 9  | 8  | 14 | +++/? | +++/? | Plexin-B2, MM1                                                                                                                                                                                     | Membrane, Single-pass type I membrane protein                                                                                                                                                                                                                                                                                                                                                                                                                                                                                                                                                                                                                                                                                                                                                                                                                                                                                                                                                                                                                                                                  | * | 1 |        |
| O43570 | 19 | 17 |    |    | 17 | 6  | 16 |    | ++/?  | +/?   | Carbonic anhydrase 12, Carbonic anhydrase XII, CA XII, Carbonate dehydratase XII, HOM-RCC-3.1.3 tumor antigen                                                                                      | Membrane, Single-pass type I membrane protein                                                                                                                                                                                                                                                                                                                                                                                                                                                                                                                                                                                                                                                                                                                                                                                                                                                                                                                                                                                                                                                                  | * | 1 |        |
| O75882 |    |    |    | 5  |    | 5  |    |    | ++    | ++    | Attractin, Mahogany homolog, DPPT-L                                                                                                                                                                | Cell membrane, Single-pass type I membrane protein, Secreted, Secreted                                                                                                                                                                                                                                                                                                                                                                                                                                                                                                                                                                                                                                                                                                                                                                                                                                                                                                                                                                                                                                         | * | 1 |        |
| O75976 | 2  | 4  |    | 22 | 37 |    |    |    |       |       | Carboxypeptidase D, Metalloprotease D, gp180                                                                                                                                                       | Membrane, Single-pass type I membrane protein                                                                                                                                                                                                                                                                                                                                                                                                                                                                                                                                                                                                                                                                                                                                                                                                                                                                                                                                                                                                                                                                  | * | 1 |        |
| P00533 |    |    |    | 3  | 7  | 6  | 4  |    | ++    | ++    | Epidermal growth factor receptor, Receptor tyrosine-protein kinase ErbB-1                                                                                                                          | Cell membrane, Single-pass type I membrane protein, Secreted                                                                                                                                                                                                                                                                                                                                                                                                                                                                                                                                                                                                                                                                                                                                                                                                                                                                                                                                                                                                                                                   | * | 1 |        |
| P01892 |    | 3  |    |    |    | 4  |    |    |       |       | HLA class I histocompatibility antigen, A-2 alpha chain, MHC class I antigen A*2                                                                                                                   | Membrane, Single-pass type I membrane protein                                                                                                                                                                                                                                                                                                                                                                                                                                                                                                                                                                                                                                                                                                                                                                                                                                                                                                                                                                                                                                                                  | * | 1 |        |
| P02786 |    | 7  |    |    |    |    |    |    | -     | ++    | Transferrin receptor protein 1, TfR1, TfR, TR, Trfr, T9, p90                                                                                                                                       | Cell membrane, Single-pass type II membrane protein, Melanosome, Identified by mass spectrometry in melanosome fractions from stage I to stage IV., Secreted                                                                                                                                                                                                                                                                                                                                                                                                                                                                                                                                                                                                                                                                                                                                                                                                                                                                                                                                                   | * | 1 | CD71   |
| P04233 |    |    |    | 11 | 31 |    |    |    | +     | ++    | HLA class II histocompatibility antigen gamma chain, HLA-DR antigens-associated invariant chain, Ia antigen-associated invariant chain, ii, p33                                                    | Membrane, Single-pass type II membrane protein                                                                                                                                                                                                                                                                                                                                                                                                                                                                                                                                                                                                                                                                                                                                                                                                                                                                                                                                                                                                                                                                 | * | 1 | CD74   |
| P04439 |    |    |    |    |    |    | 12 |    |       |       | HLA class I histocompatibility antigen, A-3 alpha chain, MHC class I antigen A*3                                                                                                                   | Membrane, Single-pass type I membrane protein                                                                                                                                                                                                                                                                                                                                                                                                                                                                                                                                                                                                                                                                                                                                                                                                                                                                                                                                                                                                                                                                  | * | 1 |        |
| P05026 | 13 | 14 |    | 6  | 12 |    |    |    | +++   | +++   | Sodium/potassium-transporting ATPase subunit beta-1, Sodium/potassium-dependent ATPase subunit beta-1                                                                                              | Membrane, Single-pass type II membrane protein                                                                                                                                                                                                                                                                                                                                                                                                                                                                                                                                                                                                                                                                                                                                                                                                                                                                                                                                                                                                                                                                 | * | 1 |        |
| P05067 | 5  | 5  |    |    |    |    | 6  |    | +/?   | +/?   | Amyloid beta A4 protein, Alzheimer disease amyloid protein, ABPP, APPI, APP, PreA4, Cerebral vascular amyloid peptide, CVAP, Protease nexin-II, PN-II                                              | Membrane, Single-pass type I membrane protein, Membrane, Clathrin-coated pit, Cell surface protein that rapidly becomes internalized via clathrin coated pits. During maturation, the immature APP (N-glycosylated in the endoplasmic reticulum) moves to the Golgi complex where complete maturation occurs (O-glycosylated and sulfated). After alpha-secretase cleavage, soluble APP is released into the extracellular space and the C-terminal is internalized to endosomes and lysosomes. Some APP accumulates in secretory transport vesicles leaving the late Golgi compartment and returns to the cell surface. Gamma-CTF(59) peptide is located to both the cytoplasm and nuclei of neurons. It can be translocated to the nucleus through association with Fe65. Beta-APP42 associates with FRPL1 at the cell surface and the complex is then rapidly internalized. APP sorts to the basolateral surface in epithelial cells. During neuronal differentiation, the Thr-743 phosphorylated form is located mainly in growth cones, moderately in neurites and sparingly in the cell body. Casein kin | * | 1 |        |

## List of Glycoprotein Identified

|        |    |    |    |    |    |     |     |     |     |    |       |       |                                                                                                                                                                                                                                                                 |                                                                                                                                                                                                                                                                                                                                                                                                                                                                                                                                                                           |   |   |        |
|--------|----|----|----|----|----|-----|-----|-----|-----|----|-------|-------|-----------------------------------------------------------------------------------------------------------------------------------------------------------------------------------------------------------------------------------------------------------------|---------------------------------------------------------------------------------------------------------------------------------------------------------------------------------------------------------------------------------------------------------------------------------------------------------------------------------------------------------------------------------------------------------------------------------------------------------------------------------------------------------------------------------------------------------------------------|---|---|--------|
| P05106 |    |    |    |    | 2  | 21  | 123 | 123 |     |    | -     | +     | Integrin beta-3, Platelet membrane glycoprotein IIIa, GPIIb/IIIa                                                                                                                                                                                                | Membrane, Single-pass type I membrane protein                                                                                                                                                                                                                                                                                                                                                                                                                                                                                                                             | * | 1 | CD61   |
| P05362 | 10 | 22 | 77 | 10 | 51 | 85  | 25  | 53  |     |    | +/?   | ++/?  | Intercellular adhesion molecule 1, ICAM-1, Major group rhinovirus receptor                                                                                                                                                                                      | Membrane, Single-pass type I membrane protein                                                                                                                                                                                                                                                                                                                                                                                                                                                                                                                             | * | 1 | CD54   |
| P05556 | 66 | 50 |    |    | 24 | 103 | 306 | 452 | 113 |    | +/?   | +++/? | Integrin beta-1, Fibronectin receptor subunit beta, Integrin VLA-4 subunit beta                                                                                                                                                                                 | Cell membrane, Single-pass type I membrane protein, Melanosome, Isoform beta-1B does not localize to focal adhesions. Highly enriched in stage I melanosomes.                                                                                                                                                                                                                                                                                                                                                                                                             | * | 1 | CD29   |
| P06756 | 83 | 45 | 62 | 4  | 51 | 118 | 292 | 350 | 49  |    | +++   | +++   | Integrin alpha-V, Vitronectin receptor subunit alpha                                                                                                                                                                                                            | Membrane, Single-pass type I membrane protein                                                                                                                                                                                                                                                                                                                                                                                                                                                                                                                             | * | 1 | CD51   |
| P08195 | 26 | 51 | 24 | 8  | 21 | 19  | 14  | 10  |     |    |       |       | 4F2 cell-surface antigen heavy chain, 4F2hc, Lymphocyte activation antigen 4F2 large subunit, 4F2 heavy chain antigen                                                                                                                                           | Apical cell membrane, Single-pass type II membrane protein, Melanosome, Identified by mass spectrometry in melanosome fractions from stage I to stage IV. Localized to the plasma membrane when associated with SLC7A5 or SLC7A8. Localized to the placental apical membrane. Located selectively at cell-cell adhesion sites (By similarity). Colocalized with SLC7A8/LAT2 at the basolateral membrane of kidney proximal tubules and small intestine epithelia. Expressed in both luminal and abluminal membranes of brain capillary endothelial cells (By similarity). | * | 1 | CD98   |
| P08581 |    |    |    |    |    | 8   | 2   |     |     |    | ++    | +++   | Hepatocyte growth factor receptor, HGF receptor, Scatter factor receptor, SF receptor, HGF/SF receptor, Met proto-oncogene tyrosine kinase, c-Met                                                                                                               | Membrane, Single-pass type I membrane protein                                                                                                                                                                                                                                                                                                                                                                                                                                                                                                                             | * | 1 |        |
| P08648 |    |    |    |    | 10 | 21  | 28  | 20  | 58  |    | -     | +     | Integrin alpha-5, Fibronectin receptor subunit alpha, Integrin alpha-F, VLA-5, CD49 antigen-like family member E                                                                                                                                                | Membrane, Single-pass type I membrane protein                                                                                                                                                                                                                                                                                                                                                                                                                                                                                                                             | * | 1 | CD49e  |
| P09603 |    |    |    |    | 1  | 10  |     |     |     |    |       |       | Macrophage colony-stimulating factor 1, CSF-1, MCSF, M-CSF, Lanimostim                                                                                                                                                                                          | Cell membrane, Single-pass membrane protein, Secreted, Extracellular space                                                                                                                                                                                                                                                                                                                                                                                                                                                                                                | * | 1 |        |
| P10586 |    | 2  |    |    |    |     |     |     |     |    | +++/? | +++/? | Receptor-type tyrosine-protein phosphatase F, LAR protein, Leukocyte antigen related                                                                                                                                                                            | Membrane, Single-pass type I membrane protein                                                                                                                                                                                                                                                                                                                                                                                                                                                                                                                             | * | 1 |        |
| P11279 | 41 | 31 | 21 | 11 | 74 | 49  | 41  | 88  | 48  | 36 | +++/? | +++/? | Lysosome-associated membrane glycoprotein 1, LAMP-1, CD107 antigen-like family member A                                                                                                                                                                         | Cell membrane, Single-pass type I membrane protein, Endosome membrane, Single-pass type I membrane protein, Lysosome membrane, Single-pass type I membrane protein, This protein shuttles between lysosomes, endosomes, and the plasma membrane.                                                                                                                                                                                                                                                                                                                          | * | 1 | CD107a |
| P11717 | 12 | 37 | 4  |    | 3  | 7   | 8   | 41  | 15  |    | +     | +++   | Cation-independent mannose-6-phosphate receptor, CI Man-6-P receptor, CI-MPR, M6PR, Insulin-like growth factor 2 receptor, Insulin-like growth factor II receptor, IGF-II receptor, M6P/IGF2 receptor, M6P/IGF2R, 300 kDa mannose 6-phosphate receptor, MPR 300 | Lysosome membrane, Single-pass type I membrane protein                                                                                                                                                                                                                                                                                                                                                                                                                                                                                                                    | * | 1 | CD222  |
| P12830 | 9  | 56 |    |    |    | 12  |     |     |     |    | +++   | +++   | Epithelial cadherin, E-cadherin, Cadherin-1, Uvomorulin, CAM 120/80                                                                                                                                                                                             | Cell junction, Cell membrane, Single-pass type I membrane protein, Colocalizes with DLGAP5 at sites of cell-cell contact in intestinal epithelial cells. Anchored to actin microfilaments through association with alpha-, beta- and gamma-catenin. Sequential proteolysis induced by apoptosis or calcium influx, results in translocation from sites of cell-cell contact to the cytoplasm.                                                                                                                                                                             | * | 1 | CD324  |
| P13473 | 54 | 43 | 31 | 11 | 58 | 20  | 12  | 44  | 20  |    | +++/? | +++/? | Lysosome-associated membrane glycoprotein 2, LAMP-2, CD107 antigen-like family member B                                                                                                                                                                         | Cell membrane, Single-pass type I membrane protein, Endosome membrane, Single-pass type I membrane protein, Lysosome membrane, Single-pass type I membrane protein, This protein shuttles between lysosomes, endosomes, and the plasma membrane.                                                                                                                                                                                                                                                                                                                          | * | 1 | CD107b |
| P13591 |    |    |    |    | 11 | 33  | 12  | 41  | 11  |    | +++/? | +++/? | Neural cell adhesion molecule 1, NCAM-1, N-CAM-1                                                                                                                                                                                                                | Cell membrane, Single-pass type I membrane protein, Cell membrane, Single-pass type I membrane protein, Cell membrane, Lipid-anchor, GPI-anchor, Cell membrane, Lipid-anchor, GPI-anchor, Secreted, Secreted                                                                                                                                                                                                                                                                                                                                                              | * | 1 | CD56   |

## List of Glycoprotein Identified

|        |     |     |    |   |    |    |     |     |     |      |       |                                                                                                                                                                                                                                                               |                                                                                                                                                                                                                                                                                                                                                                                                                                                                                                                                                                                                 |                                                               |   |       |       |
|--------|-----|-----|----|---|----|----|-----|-----|-----|------|-------|---------------------------------------------------------------------------------------------------------------------------------------------------------------------------------------------------------------------------------------------------------------|-------------------------------------------------------------------------------------------------------------------------------------------------------------------------------------------------------------------------------------------------------------------------------------------------------------------------------------------------------------------------------------------------------------------------------------------------------------------------------------------------------------------------------------------------------------------------------------------------|---------------------------------------------------------------|---|-------|-------|
| P15151 | 5   | 7   |    |   |    | 11 |     |     |     | ++/? | +/?   | Poliovirus receptor, Nectin-like protein 5, Nect-5                                                                                                                                                                                                            | Cell membrane, Single-pass type I membrane protein, Cell membrane, Single-pass type I membrane protein, Secreted, Secreted                                                                                                                                                                                                                                                                                                                                                                                                                                                                      | *                                                             | 1 | CD155 |       |
| P15529 | 20  | 23  |    |   |    | 8  |     |     |     | -/?  | +/?   | Membrane cofactor protein, Trophoblast leukocyte common antigen, TLX                                                                                                                                                                                          | Acrosome inner membrane, Single-pass type I membrane protein, Inner acrosomal membrane of spermatozoa. Internalized upon binding of Measles virus, Herpesvirus 6 or Neisseria gonorrhoeae, which results in an increased susceptibility of infected cells to complement-mediated injury. In cancer cells or cells infected by Neisseria, shedding leads to a soluble peptide.                                                                                                                                                                                                                   | *                                                             | 1 | CD46  |       |
| P15941 |     |     |    |   | 18 | 20 |     |     |     |      |       | Mucin-1, MUC-1, Polymorphic epithelial mucin, PEM, PEMT, Episialin, Tumor-associated mucin, Carcinoma-associated mucin, Tumor-associated epithelial membrane antigen, EMA, H23AG, Peanut-reactive urinary mucin, PUM, Breast carcinoma-associated antigen DF3 | Apical cell membrane, Single-pass type I membrane protein, Exclusively located in the apical domain of the plasma membrane of highly polarized epithelial cells. After endocytosis, internalized and recycled to the cell membrane. Located to microvilli and to the tips of long filopodial protrusions., Secreted, Secreted, Secreted, Cell membrane, Cytoplasm, Nucleus, On EGF and PDGFRB stimulation, transported to the nucleus through interaction with CTNNB1, a process which is stimulated by phosphorylation. On HRG stimulation, colocalizes with JUP/gamma-catenin at the nucleus. | *                                                             | 1 | CD227 |       |
| P16070 | 145 | 104 | 59 |   | 39 | 51 | 161 | 185 | 159 | 39   | +++   | +++                                                                                                                                                                                                                                                           | CD44 antigen, Phagocytic glycoprotein I, PGP-1, HUTCH-I, Extracellular matrix receptor-III, ECMR-III, GP90 lymphocyte homing/adhesion receptor, Hermes antigen, Hyaluronate receptor, Heparan sulfate proteoglycan, Epican, CDw44                                                                                                                                                                                                                                                                                                                                                               | Membrane, Single-pass type I membrane protein                 | * | 1     | CD44  |
| P16422 | 68  | 97  |    |   |    |    |     |     |     |      | ++/?  | +++/?                                                                                                                                                                                                                                                         | Tumor-associated calcium signal transducer 1, Major gastrointestinal tumor-associated protein GA733-2, Epithelial cell surface antigen, Epithelial glycoprotein, EGP, Adenocarcinoma-associated antigen, KSA, KS 1/4 antigen, Cell surface glycoprotein Trop-1                                                                                                                                                                                                                                                                                                                                  | Membrane, Single-pass type I membrane protein                 | * | 1     | CD326 |
| P17301 | 61  | 37  |    |   | 14 | 17 | 13  | 17  |     |      |       |                                                                                                                                                                                                                                                               | Integrin alpha-2, Platelet membrane glycoprotein Ia, GPIa, Collagen receptor, VLA-2 alpha chain, CD49 antigen-like family member B                                                                                                                                                                                                                                                                                                                                                                                                                                                              | Membrane, Single-pass type I membrane protein                 | * | 1     | CD49b |
| P17813 |     |     |    |   |    | 5  |     | 19  |     |      | -/?   | +++/?                                                                                                                                                                                                                                                         | Endoglin                                                                                                                                                                                                                                                                                                                                                                                                                                                                                                                                                                                        | Membrane, Single-pass type I membrane protein                 | * | 1     | CD105 |
| P18084 | 23  | 15  |    | 2 |    | 20 | 27  | 46  | 8   |      | +     | ++                                                                                                                                                                                                                                                            | Integrin beta-5                                                                                                                                                                                                                                                                                                                                                                                                                                                                                                                                                                                 | Membrane, Single-pass type I membrane protein                 | * | 1     |       |
| P18827 |     |     |    |   |    |    |     | 16  | 10  |      | -/?   | -/?                                                                                                                                                                                                                                                           | Syndecan-1, SYND1                                                                                                                                                                                                                                                                                                                                                                                                                                                                                                                                                                               | Membrane, Single-pass type I membrane protein                 | * | 1     | CD138 |
| P19022 |     |     | 2  |   | 16 | 41 | 16  | 17  | 13  |      | ++    | +++                                                                                                                                                                                                                                                           | Cadherin-2, Neural cadherin, N-cadherin, CDw325                                                                                                                                                                                                                                                                                                                                                                                                                                                                                                                                                 | Cell membrane, Single-pass type I membrane protein            | * | 1     | CD325 |
| P19440 | 9   |     |    |   | 2  | 2  |     |     |     |      |       |                                                                                                                                                                                                                                                               | Gamma-glutamyltransferase 1, Gamma-glutamyltransferase 1, GGT 1                                                                                                                                                                                                                                                                                                                                                                                                                                                                                                                                 | Membrane, Single-pass type II membrane protein                | * | 1     | CD224 |
| P20645 |     |     |    |   |    |    | 5   |     |     |      |       |                                                                                                                                                                                                                                                               | Cation-dependent mannose-6-phosphate receptor, CD Man-6-P receptor, CD-MPR, 46 kDa mannose 6-phosphate receptor, MPR 46                                                                                                                                                                                                                                                                                                                                                                                                                                                                         | Lysosome membrane, Single-pass type I membrane protein        | * | 1     |       |
| P23229 | 10  | 6   |    |   |    |    |     |     |     |      | +     | +                                                                                                                                                                                                                                                             | Integrin alpha-6, VLA-6, CD49 antigen-like family member F                                                                                                                                                                                                                                                                                                                                                                                                                                                                                                                                      | Membrane, Single-pass type I membrane protein                 | * | 1     | CD49f |
| P23470 |     |     |    |   | 2  |    | 7   | 6   |     |      |       |                                                                                                                                                                                                                                                               | Receptor-type tyrosine-protein phosphatase gamma, Protein-tyrosine phosphatase gamma, R-PTP-gamma                                                                                                                                                                                                                                                                                                                                                                                                                                                                                               | Membrane, Single-pass type I membrane protein                 | * | 1     |       |
| P25942 |     |     |    |   |    | 5  | 12  |     |     |      | -/?   | -/?                                                                                                                                                                                                                                                           | Tumor necrosis factor receptor superfamily member 5, CD40L receptor, B-cell surface antigen CD40, Bp50, CDw40                                                                                                                                                                                                                                                                                                                                                                                                                                                                                   | Cell membrane, Single-pass type I membrane protein, Secreted  | * | 1     | CD40  |
| P26006 | 10  |     |    |   | 9  | 17 | 182 | 178 | 28  |      |       |                                                                                                                                                                                                                                                               | Integrin alpha-3, Galactoprotein B3, GABP3, VLA-3 alpha chain, FRP-2, CD49 antigen-like family member C                                                                                                                                                                                                                                                                                                                                                                                                                                                                                         | Membrane, Single-pass type I membrane protein                 | * | 1     | CD49c |
| P27487 | 100 | 106 |    |   | 26 | 86 | 106 | 235 |     |      |       |                                                                                                                                                                                                                                                               | Dipeptidyl peptidase 4, Dipeptidyl peptidase IV, DPP IV, T-cell activation antigen CD26, TP103, Adenosine deaminase complexing protein 2, ADABP                                                                                                                                                                                                                                                                                                                                                                                                                                                 | Secreted, Cell membrane, Single-pass type II membrane protein | * | 1     | CD26  |
| P28827 |     |     |    |   |    | 2  | 14  |     |     |      |       |                                                                                                                                                                                                                                                               | Receptor-type tyrosine-protein phosphatase mu, Protein-tyrosine phosphatase mu, R-PTP-mu                                                                                                                                                                                                                                                                                                                                                                                                                                                                                                        | Membrane, Single-pass type I membrane protein                 | * | 1     |       |
| P29323 |     | 6   |    |   |    | 4  | 2   |     |     |      | +++/? | ++/?                                                                                                                                                                                                                                                          | Ephrin type-B receptor 2, Tyrosine-protein kinase receptor EPH-3, DRT, Receptor protein-tyrosine kinase HEK5, ERK, Tyrosine-protein kinase TYRO5, Renal carcinoma antigen NY-REN-47                                                                                                                                                                                                                                                                                                                                                                                                             | Membrane, Single-pass type I membrane protein                 | * | 1     |       |
| P30447 |     |     |    |   | 34 | 40 | 6   | 10  |     |      |       |                                                                                                                                                                                                                                                               | HLA class I histocompatibility antigen, A-23 alpha chain, MHC class I antigen A*23, A-9                                                                                                                                                                                                                                                                                                                                                                                                                                                                                                         | Membrane, Single-pass type I membrane protein                 | * | 1     |       |
| P30464 |     |     | 8  |   |    |    |     |     |     |      |       |                                                                                                                                                                                                                                                               | HLA class I histocompatibility antigen, B-15 alpha chain, MHC class I antigen B*15                                                                                                                                                                                                                                                                                                                                                                                                                                                                                                              | Membrane, Single-pass type I membrane protein                 | * | 1     |       |

List of Glycoprotein Identified

|        |     |    |    |    |    |    |    |     |     |    |       |                                                                                           |                                                                                                                                                                                                                         |                                                                                                                                                                                                                                                                                                                                                     |                                                                                                                                                                                                                                                                                                                                                                                                                                                                                                                                                                                                                                                                                                                                                                                                 |   |       |        |
|--------|-----|----|----|----|----|----|----|-----|-----|----|-------|-------------------------------------------------------------------------------------------|-------------------------------------------------------------------------------------------------------------------------------------------------------------------------------------------------------------------------|-----------------------------------------------------------------------------------------------------------------------------------------------------------------------------------------------------------------------------------------------------------------------------------------------------------------------------------------------------|-------------------------------------------------------------------------------------------------------------------------------------------------------------------------------------------------------------------------------------------------------------------------------------------------------------------------------------------------------------------------------------------------------------------------------------------------------------------------------------------------------------------------------------------------------------------------------------------------------------------------------------------------------------------------------------------------------------------------------------------------------------------------------------------------|---|-------|--------|
| P30481 |     |    |    |    | 31 | 43 |    |     |     |    |       | HLA class I histocompatibility antigen, B-44 alpha chain, MHC class I antigen B*44, Bw-44 | Membrane, Single-pass type I membrane protein                                                                                                                                                                           | *                                                                                                                                                                                                                                                                                                                                                   | 1                                                                                                                                                                                                                                                                                                                                                                                                                                                                                                                                                                                                                                                                                                                                                                                               |   |       |        |
| P30508 |     |    |    |    |    |    | 31 | 5   |     |    |       | HLA class I histocompatibility antigen, Cw-12 alpha chain, MHC class I antigen Cw*12      | Membrane, Single-pass type I membrane protein                                                                                                                                                                           | *                                                                                                                                                                                                                                                                                                                                                   | 1                                                                                                                                                                                                                                                                                                                                                                                                                                                                                                                                                                                                                                                                                                                                                                                               |   |       |        |
| P30530 |     |    |    |    |    |    |    | 3   |     |    |       | Tyrosine-protein kinase receptor UFO, AXL oncogene                                        | Membrane, Single-pass type I membrane protein                                                                                                                                                                           | *                                                                                                                                                                                                                                                                                                                                                   | 1                                                                                                                                                                                                                                                                                                                                                                                                                                                                                                                                                                                                                                                                                                                                                                                               |   |       |        |
| P30685 |     |    |    |    |    |    |    | 6   | 3   |    |       | HLA class I histocompatibility antigen, B-35 alpha chain, MHC class I antigen B*35        | Membrane, Single-pass type I membrane protein                                                                                                                                                                           | *                                                                                                                                                                                                                                                                                                                                                   | 1                                                                                                                                                                                                                                                                                                                                                                                                                                                                                                                                                                                                                                                                                                                                                                                               |   |       |        |
| P31431 |     |    |    |    |    |    |    | 9   |     |    | ++    | ++                                                                                        | Syndecan-4, SYND4, Amphiglycan, Ryudocan core protein                                                                                                                                                                   | Membrane, Single-pass type I membrane protein                                                                                                                                                                                                                                                                                                       | *                                                                                                                                                                                                                                                                                                                                                                                                                                                                                                                                                                                                                                                                                                                                                                                               | 1 |       |        |
| P32970 |     |    |    |    | 30 | 79 |    |     | 34  | 5  |       |                                                                                           | CD70 antigen, CD27 ligand, CD27-L, Tumor necrosis factor ligand superfamily member 7                                                                                                                                    | Membrane, Single-pass type II membrane protein                                                                                                                                                                                                                                                                                                      | *                                                                                                                                                                                                                                                                                                                                                                                                                                                                                                                                                                                                                                                                                                                                                                                               | 1 | CD70  |        |
| P35613 | 116 | 77 | 28 |    | 31 | 89 | 77 | 124 | 60  |    | -     | +++                                                                                       | Basigin, Leukocyte activation antigen M6, Collagenase stimulatory factor, Extracellular matrix metalloproteinase inducer, EMMPRIN, 5F7, Tumor cell-derived collagenase stimulatory factor, TCSF, OK blood group antigen | Cell membrane, Single-pass type I membrane protein, Melanosome, Colocalizes with SLC16A1 and SLC16A8 (By similarity). Identified by mass spectrometry in melanosome fractions from stage I to stage IV.                                                                                                                                             | *                                                                                                                                                                                                                                                                                                                                                                                                                                                                                                                                                                                                                                                                                                                                                                                               | 1 | CD147 |        |
| P42892 |     |    |    |    |    |    | 4  | 18  | 59  |    | +++/? | +++/?                                                                                     | Endothelin-converting enzyme 1, ECE-1                                                                                                                                                                                   | Membrane, Single-pass type II membrane protein                                                                                                                                                                                                                                                                                                      | *                                                                                                                                                                                                                                                                                                                                                                                                                                                                                                                                                                                                                                                                                                                                                                                               | 1 |       |        |
| P43121 | 9   |    | 88 | 25 | 2  | 52 | 65 | 72  | 179 |    | -/?   | -/?                                                                                       | Cell surface glycoprotein MUC18, Melanoma-associated antigen MUC18, Melanoma cell adhesion molecule, Melanoma-associated antigen A32, S-endo 1 endothelial-associated antigen, Cell surface glycoprotein P1H12          | Membrane, Single-pass type I membrane protein                                                                                                                                                                                                                                                                                                       | *                                                                                                                                                                                                                                                                                                                                                                                                                                                                                                                                                                                                                                                                                                                                                                                               | 1 | CD146 |        |
| P43307 |     |    | 14 |    |    |    |    |     |     | 6  |       | +                                                                                         | ++                                                                                                                                                                                                                      | Translocon-associated protein subunit alpha, TRAP, alpha, Signal sequence receptor subunit alpha, SSR alpha                                                                                                                                                                                                                                         | Endoplasmic reticulum membrane, Single-pass type I membrane protein                                                                                                                                                                                                                                                                                                                                                                                                                                                                                                                                                                                                                                                                                                                             | * | 1     |        |
| P49755 |     |    |    |    |    |    |    |     |     | 13 |       |                                                                                           |                                                                                                                                                                                                                         | Transmembrane emp24 domain-containing protein 10, 21 kDa transmembrane-trafficking protein, Transmembrane protein Tmp21, Tmp-21-I, p24delta, S31III125, S31I125                                                                                                                                                                                     | Golgi apparatus membrane, Single-pass type I membrane protein, Melanosome, Identified by mass spectrometry in melanosome fractions from stage I to stage IV.                                                                                                                                                                                                                                                                                                                                                                                                                                                                                                                                                                                                                                    | * | 1     |        |
| P50895 | 22  | 85 |    |    | 4  | 13 |    |     |     |    |       |                                                                                           |                                                                                                                                                                                                                         | Lutheran blood group glycoprotein, B-CAM cell surface glycoprotein, Auberger B antigen, F8/G253 antigen                                                                                                                                                                                                                                             | Membrane, Single-pass type I membrane protein                                                                                                                                                                                                                                                                                                                                                                                                                                                                                                                                                                                                                                                                                                                                                   | * | 1     | CD239  |
| P52799 | 2   | 9  |    |    |    |    |    |     |     |    |       | ++                                                                                        | ++                                                                                                                                                                                                                      | Ephrin-B2, EPH-related receptor tyrosine kinase ligand 5, LERK-5, HTK ligand, HTK-L                                                                                                                                                                                                                                                                 | Membrane, Single-pass type I membrane protein                                                                                                                                                                                                                                                                                                                                                                                                                                                                                                                                                                                                                                                                                                                                                   | * | 1     |        |
| P54289 |     |    |    |    |    |    | 3  | 1   |     |    |       | -/?                                                                                       | -/?                                                                                                                                                                                                                     | Voltage-dependent calcium channel subunit alpha-2/delta-1, Voltage-gated calcium channel subunit alpha-2/delta-1                                                                                                                                                                                                                                    | Membrane, Single-pass type I membrane protein                                                                                                                                                                                                                                                                                                                                                                                                                                                                                                                                                                                                                                                                                                                                                   | * | 1     |        |
| P54709 |     |    | 10 |    |    |    |    |     |     | 7  |       |                                                                                           |                                                                                                                                                                                                                         | Sodium/potassium-transporting ATPase subunit beta-3, Sodium/potassium-dependent ATPase subunit beta-3, ATPB-3                                                                                                                                                                                                                                       | Membrane, Single-pass type II membrane protein, Melanosome, Identified by mass spectrometry in melanosome fractions from stage I to stage IV.                                                                                                                                                                                                                                                                                                                                                                                                                                                                                                                                                                                                                                                   | * | 1     | CD298  |
| P54753 | 2   | 14 |    |    |    |    |    |     |     |    |       | +++/?                                                                                     | +++/?                                                                                                                                                                                                                   | Ephrin type-B receptor 3, Tyrosine-protein kinase receptor HEK-2, Tyrosine-protein kinase TYRO6                                                                                                                                                                                                                                                     | Membrane, Single-pass type I membrane protein                                                                                                                                                                                                                                                                                                                                                                                                                                                                                                                                                                                                                                                                                                                                                   | * | 1     |        |
| P55285 |     |    |    |    |    | 5  |    |     |     |    |       | +/?                                                                                       | ++/?                                                                                                                                                                                                                    | Cadherin-6, Kidney cadherin, K-cadherin                                                                                                                                                                                                                                                                                                             | Cell membrane, Single-pass type I membrane protein                                                                                                                                                                                                                                                                                                                                                                                                                                                                                                                                                                                                                                                                                                                                              | * | 1     |        |
| P56199 | 4   | 8  |    |    |    |    |    |     |     | 3  |       |                                                                                           |                                                                                                                                                                                                                         | Integrin alpha-1, Laminin and collagen receptor, VLA-1, CD49 antigen-like family member A                                                                                                                                                                                                                                                           | Membrane, Single-pass type I membrane protein                                                                                                                                                                                                                                                                                                                                                                                                                                                                                                                                                                                                                                                                                                                                                   | * | 1     | CD49a  |
| P78310 |     |    |    |    |    |    | 5  | 4   |     |    |       | -                                                                                         | ++                                                                                                                                                                                                                      | Coxsackievirus and adenovirus receptor, Coxsackievirus B-adenovirus receptor, HCVADR, hCAR, CVB3-binding protein                                                                                                                                                                                                                                    | Cell membrane, Single-pass type I membrane protein, Cell junction, Tight junction, Cell junction, Adherens junction, Basolateral cell membrane, Single-pass type I membrane protein, In epithelial cells localizes to the apical junction complex composed of tight and adherens junctions. In airway epithelial cells localized to basolateral membrane but not to apical surface., Cell membrane, Single-pass type I membrane protein, Cell junction, Tight junction, Cell junction, Adherens junction, Basolateral cell membrane, Single-pass membrane protein, In epithelial cells localizes to the apical junction complex composed of tight and adherens junctions. In airway epithelial cells localized to basolateral membrane but not to apical surface., Secreted, Secreted, Secreted | * | 1     |        |
| P78324 |     |    |    |    |    |    | 15 | 20  |     |    |       | -/?                                                                                       | -/?                                                                                                                                                                                                                     | Tyrosine-protein phosphatase non-receptor type substrate 1, SHP substrate 1, SHPS-1, Inhibitory receptor SHPS-1, Signal regulatory protein alpha-1, Sirp-alpha-1, Sirp-alpha-2, Sirp-alpha-3, MYD-1 antigen, Brain Ig-like molecule with tyrosine-based activation motifs, Bit, Macrophage fusion receptor, p84, CD172 antigen-like family member A | Membrane, Single-pass type I membrane protein                                                                                                                                                                                                                                                                                                                                                                                                                                                                                                                                                                                                                                                                                                                                                   | * | 1     | CD172a |

## List of Glycoprotein Identified

|        |    |    |    |   |    |    |     |     |    |       |       |                                                                                                                                                                                                   |                                                                                                                                                                                                                                                                         |                                                         |   |       |  |
|--------|----|----|----|---|----|----|-----|-----|----|-------|-------|---------------------------------------------------------------------------------------------------------------------------------------------------------------------------------------------------|-------------------------------------------------------------------------------------------------------------------------------------------------------------------------------------------------------------------------------------------------------------------------|---------------------------------------------------------|---|-------|--|
| P98172 | 4  | 20 |    |   |    |    |     |     |    | +/?   | ++/?  | Ephrin-B1, EPH-related receptor tyrosine kinase ligand 2, LERK-2, ELK ligand, ELK-L                                                                                                               | Membrane, Single-pass type I membrane protein                                                                                                                                                                                                                           | *                                                       | 1 |       |  |
| Q02487 |    | 7  |    |   |    |    |     |     |    | +     | ++/+  | Desmocollin-2, Desmosomal glycoprotein II and III, Desmocollin-3                                                                                                                                  | Cell membrane, Single-pass type I membrane protein, Cell junction, Desmosome                                                                                                                                                                                            | *                                                       | 1 |       |  |
| Q04721 | 1  | 4  |    |   |    |    |     |     |    |       |       | Neurogenic locus notch homolog protein 2, Notch 2, hN2                                                                                                                                            | Cell membrane, Single-pass type I membrane protein, Nucleus, Following proteolytical processing NICD is translocated to the nucleus.                                                                                                                                    | *                                                       | 1 |       |  |
| Q07954 |    |    | 7  |   | 3  | 18 |     | 6   | 4  | -/?   | -/?   | Prolow-density lipoprotein receptor-related protein 1, LRP, Alpha-2-macroglobulin receptor, A2MR, Apolipoprotein E receptor, APOER                                                                | Cell membrane, Single-pass type I membrane protein, Membrane, Coated pit, Cell membrane, Peripheral membrane protein, Membrane, Coated pit, Cytoplasm, Nucleus, After cleavage, the intracellular domain (LRPICD) is detected both in the cytoplasm and in the nucleus. | *                                                       | 1 | CD91  |  |
| Q10589 |    |    |    |   | 3  | 11 |     |     |    |       |       | Bone marrow stromal antigen 2, BST-2, HM1.24 antigen                                                                                                                                              | Golgi apparatus, trans-Golgi network, Cell membrane, Single-pass type II membrane protein, Cell membrane, Lipid-anchor, GPI-anchor                                                                                                                                      | *                                                       | 1 | CD317 |  |
| Q12907 |    |    |    | 4 |    |    |     |     |    | ++/?  | ++/?  | Vesicular integral-membrane protein VIP36, Lectin mannose-binding 2, Glycoprotein GP36b                                                                                                           | Endoplasmic reticulum-Golgi intermediate compartment membrane, Single-pass type I membrane protein, Golgi apparatus membrane, Single-pass membrane protein, Endoplasmic reticulum membrane, Single-pass type I membrane protein                                         | *                                                       | 1 |       |  |
| Q13308 |    | 10 |    |   |    | 8  | 6   |     |    | +/?   | ++/?  | Tyrosine-protein kinase-like 7, Colon carcinoma kinase 4, CCK-4                                                                                                                                   | Membrane, Single-pass type I membrane protein                                                                                                                                                                                                                           | *                                                       | 1 |       |  |
| Q13641 |    |    |    |   | 7  | 9  | 7   | 32  | 14 | ++/?  | ++/?  | Trophoblast glycoprotein, 5T4 oncofetal trophoblast glycoprotein, 5T4 oncotrophoblast glycoprotein, 5T4 oncofetal antigen, M6P1                                                                   | Membrane, Single-pass type I membrane protein                                                                                                                                                                                                                           | *                                                       | 1 |       |  |
| Q13740 | 12 | 6  |    |   | 26 | 92 | 206 | 539 | 9  | +/?   | +++/? | CD166 antigen, Activated leukocyte cell adhesion molecule                                                                                                                                         | Membrane, Single-pass type I membrane protein                                                                                                                                                                                                                           | *                                                       | 1 | CD166 |  |
| Q14118 |    | 3  |    |   |    |    |     |     | 8  | +/?   | +/?   | Dystroglycan, Dystrophin-associated glycoprotein 1                                                                                                                                                | Secreted, Extracellular space, Cell membrane, Single-pass type I membrane protein, Cytoplasm, Cytoskeleton                                                                                                                                                              | *                                                       | 1 |       |  |
| Q14126 |    | 13 |    |   | 11 | 35 |     |     |    | +++/? | ++/?  | Desmoglein-2, HDGC                                                                                                                                                                                | Cell membrane, Single-pass type I membrane protein, Cell junction, Desmosome                                                                                                                                                                                            | *                                                       | 1 |       |  |
| Q14956 |    |    | 19 |   |    |    |     |     |    |       |       | Transmembrane glycoprotein NMB, Transmembrane glycoprotein HGFIN                                                                                                                                  | Membrane, Single-pass type I membrane protein, Melanosome, Identified by mass spectrometry in melanosome fractions from stage I to stage IV.                                                                                                                            | *                                                       | 1 |       |  |
| Q15223 | 1  | 5  |    |   |    |    |     |     |    | ++/?? | +/??  | Poliovirus receptor-related protein 1, Herpes virus entry mediator C, HveC, Nectin-1, Herpesvirus Ig-like receptor, HlgR                                                                          | Cell membrane, Single-pass type I membrane protein, Cell membrane, Single-pass type I membrane protein, Secreted                                                                                                                                                        | *                                                       | 1 | CD111 |  |
| Q15262 |    | 5  |    |   | 2  | 14 |     |     |    |       |       | Receptor-type tyrosine-protein phosphatase kappa, Protein-tyrosine phosphatase kappa, R-PTP-kappa                                                                                                 | Cell junction, Adherens junction, Cell membrane, Single-pass type I membrane protein                                                                                                                                                                                    | *                                                       | 1 |       |  |
| Q16651 |    | 5  |    |   |    | 7  |     |     |    |       |       | Prostasin, Serine protease 8                                                                                                                                                                      | Cell membrane, Single-pass membrane protein, Secreted, Extracellular space, Found in the seminal fluid. Secreted after cleavage of its C-terminus., Secreted, Extracellular space, Found in the seminal fluid. Secreted after cleavage of its C-terminus.               | *                                                       | 1 |       |  |
| Q16790 | 6  | 32 |    |   |    |    |     |     |    | +     | -     | Carbonic anhydrase 9, Carbonic anhydrase IX, CA-IX, CAIX, Carbonate dehydratase IX, Membrane antigen MN, P54/58N, Renal cell carcinoma-associated antigen G250, RCC-associated antigen G250, pMW1 | Nucleus, Nucleus, Nucleolus, Cell membrane, Single-pass type I membrane protein, Cell projection, Microvillus membrane, Single-pass type I membrane protein, Found on the surface microvilli and in the nucleus, particularly in nucleolus.                             | *                                                       | 1 |       |  |
| Q5ZPR3 | 10 | 5  | 4  |   | 9  | 26 | 16  | 40  | 48 | ++/?  | ++/?  | CD276 antigen, Costimulatory molecule, B7 homolog 3, B7-H3, 4lg-B7-H3                                                                                                                             | Membrane, Single-pass type I membrane protein                                                                                                                                                                                                                           | *                                                       | 1 | CD276 |  |
| Q6EMK4 |    |    |    |   | 19 | 89 | 2   | 14  | 25 | 5     | -/?   | ++/?                                                                                                                                                                                              | Vasorin, Protein slit-like 2                                                                                                                                                                                                                                            | Membrane, Single-pass type I membrane protein, Secreted | * | 1     |  |

## List of Glycoprotein Identified

|        |   |    |     |     |    |    |     |     |      |       |                                                                                                                                                                                              |                                                                                                                                                                                                                                                                                                                                                                                                                                                                                                                                                                                                                                                                                                                                                                                                                         |   |   |       |
|--------|---|----|-----|-----|----|----|-----|-----|------|-------|----------------------------------------------------------------------------------------------------------------------------------------------------------------------------------------------|-------------------------------------------------------------------------------------------------------------------------------------------------------------------------------------------------------------------------------------------------------------------------------------------------------------------------------------------------------------------------------------------------------------------------------------------------------------------------------------------------------------------------------------------------------------------------------------------------------------------------------------------------------------------------------------------------------------------------------------------------------------------------------------------------------------------------|---|---|-------|
| Q6UVK1 | 5 | 28 | 294 | 531 |    |    | 294 | 143 | ++/? | +++/? | Chondroitin sulfate proteoglycan 4, Chondroitin sulfate proteoglycan NG2, Melanoma chondroitin sulfate proteoglycan, Melanoma-associated chondroitin sulfate proteoglycan                    | Apical cell membrane, Single-pass type I membrane protein, Cell projection, Lamellipodium membrane, Single-pass type I membrane protein, Localized at the apical plasma membrane it relocalizes to the lamellipodia of astrocytoma upon phosphorylation by PRKCA. Localizes to the retraction fibers. Localizes to the plasma membrane of oligodendrocytes (By similarity).                                                                                                                                                                                                                                                                                                                                                                                                                                             | * | 1 |       |
| Q86UP2 |   |    |     |     |    |    |     |     | +++  | +++   | Kinectin, Kinesin receptor, CG-1 antigen                                                                                                                                                     | Endoplasmic reticulum membrane, Single-pass type II membrane protein, Vesicle membrane protein anchored to the endoplasmic reticulum.                                                                                                                                                                                                                                                                                                                                                                                                                                                                                                                                                                                                                                                                                   | * | 1 |       |
| Q8NB4  | 4 | 6  |     |     |    |    |     |     | +++  | +++   | Golgi membrane protein 1, Golgi phosphoprotein 2, Golgi membrane protein GP73                                                                                                                | Golgi apparatus, cis-Golgi network membrane, Single-pass type II membrane protein, Early Golgi. Cycles via the cell surface and endosomes upon luminal pH disruption.                                                                                                                                                                                                                                                                                                                                                                                                                                                                                                                                                                                                                                                   | * | 1 |       |
| Q8TEM1 |   | 2  |     |     |    |    |     |     |      |       | Nuclear pore membrane glycoprotein 210, POM210, Nuclear pore protein gp210                                                                                                                   | Nucleus, Nuclear pore complex, Nucleus membrane, Single-pass type I membrane protein, Endoplasmic reticulum membrane, Single-pass type I membrane protein                                                                                                                                                                                                                                                                                                                                                                                                                                                                                                                                                                                                                                                               | * | 1 |       |
| Q8WUT4 |   |    |     |     |    | 20 | 43  |     | +    | ++    | Leucine-rich repeat-containing protein C20orf75                                                                                                                                              | Membrane, Single-pass type I membrane protein                                                                                                                                                                                                                                                                                                                                                                                                                                                                                                                                                                                                                                                                                                                                                                           | * | 1 |       |
| Q92542 | 2 | 2  |     |     |    |    |     |     |      |       | Nicastrin                                                                                                                                                                                    | Membrane, Single-pass type I membrane protein, Melanosome, Identified by mass spectrometry in melanosome fractions from stage I to stage IV.                                                                                                                                                                                                                                                                                                                                                                                                                                                                                                                                                                                                                                                                            | * | 1 |       |
| Q92692 | 5 | 22 |     |     | 10 |    | 16  |     | ++   | ++    | Poliovirus receptor-related protein 2, Herpes virus entry mediator B, HveB, Nectin-2                                                                                                         | Cell membrane, Single-pass type I membrane protein                                                                                                                                                                                                                                                                                                                                                                                                                                                                                                                                                                                                                                                                                                                                                                      | * | 1 | CD112 |
| Q92823 |   |    |     |     | 7  |    |     |     |      |       | Neuronal cell adhesion molecule, Nr-CAM, NgCAM-related cell adhesion molecule, Ng-CAM-related, hBravo                                                                                        | Cell membrane, Single-pass type I membrane protein                                                                                                                                                                                                                                                                                                                                                                                                                                                                                                                                                                                                                                                                                                                                                                      | * | 1 |       |
| Q92859 |   |    |     |     |    |    | 3   |     | ++   | ++    | Neogenin                                                                                                                                                                                     | Cell membrane, Single-pass type I membrane protein                                                                                                                                                                                                                                                                                                                                                                                                                                                                                                                                                                                                                                                                                                                                                                      | * | 1 |       |
| Q92896 | 7 | 2  |     | 7   | 12 |    | 21  | 7   | ++   | +++   | Golgi apparatus protein 1, Golgi sialoglycoprotein MG-160, E-selectin ligand 1, ESL-1, Cysteine-rich fibroblast growth factor receptor, CFR-1                                                | Golgi apparatus membrane, Single-pass type I membrane protein                                                                                                                                                                                                                                                                                                                                                                                                                                                                                                                                                                                                                                                                                                                                                           | * | 1 |       |
| Q969P0 |   |    |     | 15  |    |    |     |     | -    | +     | Immunoglobulin superfamily member 8, CD81 partner 3, Glu-Trp-Ile EWI motif-containing protein 2, EWI-2, Keratinocytes-associated transmembrane protein 4, KCT-4, LIR-D1                      | Membrane, Single-pass membrane protein                                                                                                                                                                                                                                                                                                                                                                                                                                                                                                                                                                                                                                                                                                                                                                                  | * | 1 | CD316 |
| Q96D42 |   |    |     |     |    | 18 | 31  |     | ++/? | +/?   | Hepatitis A virus cellular receptor 1, HAVcr-1, T-cell immunoglobulin and mucin domain-containing protein 1, TIMD-1, T-cell membrane protein 1, TIM-1, TIM                                   | Membrane, Single-pass type I membrane protein                                                                                                                                                                                                                                                                                                                                                                                                                                                                                                                                                                                                                                                                                                                                                                           | * | 1 |       |
| Q96PD2 |   |    |     |     | 3  | 9  | 13  | 6   |      |       | Discooidin, CUB and LCCL domain-containing protein 2, Endothelial and smooth muscle cell-derived neuropilin-like protein, CUB, LCCL and coagulation factor V/VIII-homology domains protein 1 | Membrane, Single-pass type I membrane protein                                                                                                                                                                                                                                                                                                                                                                                                                                                                                                                                                                                                                                                                                                                                                                           | * | 1 |       |
| Q99523 |   | 3  |     |     |    |    |     |     | ++/? | +++/? | Sortilin, Neurtensin receptor 3, NTR3, NT3, Glycoprotein 95, Gp95, 100 kDa NT receptor                                                                                                       | Membrane, Single-pass type I membrane protein, Endoplasmic reticulum membrane, Single-pass type I membrane protein, Endosome membrane, Single-pass type I membrane protein, Golgi apparatus, Golgi stack membrane, Single-pass type I membrane protein, Lysosome membrane, Single-pass type I membrane protein, Nucleus membrane, Single-pass type I membrane protein, Cell membrane, Single-pass type I membrane protein, Lysosome membrane, Single-pass type I membrane protein, Localized to membranes of the endoplasmic reticulum, endosomes, Golgi stack, lysosomes and nucleus. A small fraction of the protein is also localized to the plasma membrane. May also be found in SLC2A4/GLUT4 storage vesicles (GSVs) in adipocytes. Localization to the plasma membrane in adipocytes may be enhanced by insulin. | * | 1 |       |
| Q96VK6 |   |    |     |     |    |    | 10  |     | +++  | +++   | Transmembrane emp24 domain-containing protein 9, Glycoprotein 25L2                                                                                                                           | Endoplasmic reticulum membrane, Single-pass type I membrane protein                                                                                                                                                                                                                                                                                                                                                                                                                                                                                                                                                                                                                                                                                                                                                     | * | 1 |       |

## List of Glycoprotein Identified

|        |     |     |    |     |     |     |     |     |     |    |       |        |                                                                                                                                                                                                                 |                                                                                                                                                           |   |   |       |
|--------|-----|-----|----|-----|-----|-----|-----|-----|-----|----|-------|--------|-----------------------------------------------------------------------------------------------------------------------------------------------------------------------------------------------------------------|-----------------------------------------------------------------------------------------------------------------------------------------------------------|---|---|-------|
| Q9H5V8 | 4   | 4   |    |     |     | 3   |     |     |     |    | +/?   | +/?    | CUB domain-containing protein 1, Transmembrane and associated with src kinases, Membrane glycoprotein gp140, Subtractive immunization M plus HEP3-associated 135 kDa protein, SIMA135                           | Cell membrane, Single-pass membrane protein, Shedding may also lead to a soluble peptide, Secreted                                                        | * | 1 | CD318 |
| Q9HDC9 | 5   | 10  |    | 7   |     | 2   |     |     |     |    | +++   | +++    | Adipocyte plasma membrane-associated protein, BSCv protein                                                                                                                                                      | Membrane, Single-pass type II membrane protein                                                                                                            | * | 1 |       |
| Q9NPH3 |     |     | 8  |     |     |     |     |     |     |    |       |        | Interleukin-1 receptor accessory protein, IL-1 receptor accessory protein, IL-1RAcP                                                                                                                             | Cell membrane, Single-pass type I membrane protein, Secreted, Secreted, Secreted                                                                          | * | 1 |       |
| Q9NPR2 |     | 3   |    |     |     |     |     |     |     |    | ++/?  | ++/?   | Semaphorin-4B                                                                                                                                                                                                   | Membrane, Single-pass type I membrane protein                                                                                                             | * | 1 |       |
| Q9P2B2 | 9   | 10  | 15 | 4   |     | 13  | 5   |     | 6   |    | +/?   | ++/?   | Prostaglandin F2 receptor negative regulator, Prostaglandin F2-alpha receptor regulatory protein, Prostaglandin F2-alpha receptor-associated protein, CD9 partner 1, CD9P-1                                     | Endoplasmic reticulum membrane, Single-pass type I membrane protein, Golgi apparatus, trans-Golgi network membrane, Single-pass type I membrane protein   | * | 1 | CD315 |
| Q9UBG0 |     |     |    | 27  | 31  | 74  | 11  | 72  | 43  |    |       |        | Macrophage mannose receptor 2, Urokinase receptor-associated protein, Endocytic receptor 180                                                                                                                    | Membrane, Single-pass type I membrane protein                                                                                                             | * | 1 | CD280 |
| Q9UMF0 |     |     |    |     | 2   | 15  |     |     |     |    | +/?   | +/?    | Intercellular adhesion molecule 5, ICAM-5, Telencephalin                                                                                                                                                        | Membrane, Single-pass type I membrane protein                                                                                                             | * | 1 |       |
| Q9UNN8 |     |     |    |     |     |     | 5   | 4   |     |    |       |        | Endothelial protein C receptor, Endothelial cell protein C receptor, Activated protein C receptor, APC receptor                                                                                                 | Membrane, Single-pass type I membrane protein                                                                                                             | * | 1 | CD201 |
| Q9Y3B3 |     |     |    | 11  |     |     | 3   |     |     |    |       |        | Transmembrane emp24 domain-containing protein 7                                                                                                                                                                 | Endoplasmic reticulum membrane, Single-pass type I membrane protein                                                                                       | * | 1 |       |
| Q9Y5Y6 | 37  | 53  |    |     |     |     |     |     |     |    |       |        | Suppressor of tumorigenicity protein 14, Serine protease 14, Matriptase, Membrane-type serine protease 1, MT-SP1, Prostamin, Serine protease TADG-15, Tumor-associated differentially-expressed gene 15 protein | Membrane, Single-pass type II membrane protein                                                                                                            | * | 1 |       |
| Q9Y624 | 2   | 3   |    |     |     |     | 12  | 9   |     |    | +++   | +++    | Junctional adhesion molecule A, JAM-A, Junctional adhesion molecule 1, JAM-1, Platelet adhesion molecule 1, PAM-1, Platelet F11 receptor                                                                        | Cell junction, Tight junction, Cell membrane, Single-pass type I membrane protein, Localized at tight junctions of both epithelial and endothelial cells. | * | 1 | CD321 |
| O00115 | 8   | 16  | 42 | 27  | 42  | 64  | 33  | 44  | 13  | 12 |       |        | Deoxyribonuclease-2-alpha, Deoxyribonuclease II alpha, DNase II alpha, Acid DNase, Lysosomal DNase II, R31240_2                                                                                                 | Lysosome                                                                                                                                                  | * | 0 |       |
| O00462 |     | 28  |    |     |     |     | 13  | 25  |     |    |       |        | Beta-mannosidase, Lysosomal beta A mannosidase, Mannanase, Mannase                                                                                                                                              | Lysosome                                                                                                                                                  | * | 0 |       |
| O00468 | 169 | 167 |    |     |     | 104 | 7   | 61  | 2   |    |       |        | Aggrin                                                                                                                                                                                                          | Secreted, Extracellular space, Extracellular matrix, Synaptic basal lamina at the neuromuscular junction (By similarity).                                 | * | 0 |       |
| O00469 |     |     |    |     |     | 14  | 3   |     |     |    |       |        | Procollagen-lysine,2-oxoglutarate 5-dioxygenase 2, Lysyl hydroxylase 2, LH2                                                                                                                                     | Rough endoplasmic reticulum membrane, Peripheral membrane protein                                                                                         | * | 0 |       |
| O00584 | 20  | 37  |    | 4   |     | 4   | 108 | 208 |     |    |       |        | Ribonuclease T2, Ribonuclease 6                                                                                                                                                                                 | Secreted                                                                                                                                                  | * | 0 |       |
| O00754 | 3   | 5   | 10 | 20  | 11  | 66  | 85  | 36  |     | 13 |       |        | Lysosomal alpha-mannosidase, Laman, Lysosomal acid alpha-mannosidase, Mannosidase alpha class 2B member 1, Mannosidase, alpha B                                                                                 | Lysosome                                                                                                                                                  | * | 0 |       |
| O14773 | 92  | 182 | 88 | 57  | 54  | 122 | 72  | 170 | 13  | 22 |       |        | Tripeptidyl-peptidase 1, TPP-1, Tripeptidyl-peptidase I, TPP-I, Tripeptidyl aminopeptidase, Lysosomal pepstatin-insensitive protease, LPIC, Cell growth-inhibiting gene 1 protein                               | Lysosome, Melanosome, Identified by mass spectrometry in melanosome fractions from stage I to stage IV.                                                   | * | 0 |       |
| O15230 | 2   | 5   |    |     |     | 4   |     | 7   |     |    |       |        | Laminin subunit alpha-5                                                                                                                                                                                         | Secreted, Extracellular space, Extracellular matrix, Basement membrane, Major component.                                                                  | * | 0 |       |
| O15460 |     |     |    | 4   |     |     |     |     |     |    |       |        | Prolyl 4-hydroxylase subunit alpha-2, 4-PH alpha-2, Procollagen-proline,2-oxoglutarate-4-dioxygenase subunit alpha-2                                                                                            | Endoplasmic reticulum lumen                                                                                                                               | * | 0 |       |
| O43278 | 10  | 23  |    |     |     |     |     |     |     |    | ++    | ++/+++ | Kunitz-type protease inhibitor 1, Hepatocyte growth factor activator inhibitor type 1, HAI-1                                                                                                                    | Secreted                                                                                                                                                  | * | 0 |       |
| O43852 |     |     | 25 | 311 | 136 | 39  |     | 740 | 116 |    | +++/? | ++/?   | Calumenin, Crocalbin, IEF SSP 9302                                                                                                                                                                              | Endoplasmic reticulum lumen, Secreted, Melanosome, Identified by mass spectrometry in melanosome fractions from stage I to stage IV.                      | * | 0 |       |
| O60568 |     |     | 39 | 88  |     |     |     |     |     |    |       |        | Procollagen-lysine,2-oxoglutarate 5-dioxygenase 3, Lysyl hydroxylase 3, LH3                                                                                                                                     | Rough endoplasmic reticulum membrane, Peripheral membrane protein                                                                                         | * | 0 |       |
| O75503 | 4   | 5   |    |     |     |     | 8   | 10  |     |    |       |        | Ceroid-lipofuscinosis neuronal protein 5, Protein CLN5                                                                                                                                                          | Lysosome                                                                                                                                                  | * | 0 |       |
| O75629 |     |     |    |     |     | 32  | 11  | 32  |     |    |       |        | Protein CREG1, Cellular repressor of E1A-stimulated genes 1                                                                                                                                                     | Secreted                                                                                                                                                  | * | 0 |       |
| O94907 |     | 7   |    |     |     |     |     |     |     |    | ++/?  | ++/?   | Dickkopf-related protein 1, Dickkopf-1, Dkk-1, hDkk-1, SK                                                                                                                                                       | Secreted                                                                                                                                                  | * | 0 |       |
| O95302 |     |     |    |     |     | 5   |     |     |     |    | ++    | +++    | FK506-binding protein 9, Peptidyl-prolyl cis-trans isomerase, PPlase, Rotamase                                                                                                                                  | Endoplasmic reticulum                                                                                                                                     | * | 0 |       |
| P00749 |     |     |    |     |     | 12  |     | 15  |     |    | +/?   | +/?    | Urokinase-type plasminogen activator, U-plasminogen activator, uPA                                                                                                                                              | Secreted                                                                                                                                                  | * | 0 |       |



## List of Glycoprotein Identified

|        |     |     |      |      |     |     |     |      |     |     |       |       |                                                                                                                                                                                                   |                                                                                                           |   |   |      |
|--------|-----|-----|------|------|-----|-----|-----|------|-----|-----|-------|-------|---------------------------------------------------------------------------------------------------------------------------------------------------------------------------------------------------|-----------------------------------------------------------------------------------------------------------|---|---|------|
| P00750 |     |     | 11   |      |     |     |     |      |     |     | ++    | +++   | Tissue-type plasminogen activator, t-plasminogen activator, t-PA, tPA                                                                                                                             | Secreted, Extracellular space                                                                             | * | 0 |      |
| P01009 | 101 | 147 |      |      |     |     |     |      |     |     | -     | +/-   | Alpha-1-antitrypsin, Alpha-1 protease inhibitor, Alpha-1-antiproteinase                                                                                                                           | Secreted                                                                                                  | * | 0 |      |
| P01011 |     |     | 3804 | 1960 |     |     | 4   | 11   | 99  | 158 | ++    | ++    | Alpha-1-antichymotrypsin, ACT, Cell growth-inhibiting gene 24/25 protein                                                                                                                          | Secreted                                                                                                  | * | 0 |      |
| P01019 | 8   | 11  |      |      |     |     | 18  |      |     |     | +     | +/+++ | Angiotensinogen, Serpin A8                                                                                                                                                                        | Secreted                                                                                                  | * | 0 |      |
| P01023 | 3   | 11  | 30   | 27   |     |     |     |      |     |     | +     | ++    | Alpha-2-macroglobulin, Alpha-2-M, C3 and PZP-like alpha-2-macroglobulin domain-containing protein 5                                                                                               | Secreted                                                                                                  | * | 0 |      |
| P01024 |     |     |      |      |     |     |     | 5    |     |     | -/?   | -/?   | Complement C3, C3 and PZP-like alpha-2-macroglobulin domain-containing protein 1                                                                                                                  | Secreted                                                                                                  | * | 0 |      |
| P01033 | 9   |     |      |      |     | 25  | 5   | 11   |     |     |       |       | Metalloproteinase inhibitor 1, Tissue inhibitor of metalloproteinases, TIMP-1, Erythroid-potentiating activity, EPA, Fibroblast collagenase inhibitor, Collagenase inhibitor                      | Secreted                                                                                                  | * | 0 |      |
| P01137 | 2   | 6   |      |      |     |     | 5   |      |     |     | -/?   | +/?   | Transforming growth factor beta-1, TGF-beta-1                                                                                                                                                     | Secreted                                                                                                  | * | 0 |      |
| P02462 |     |     | 24   |      |     |     | 34  | 12   |     |     | +     | ++    | Collagen alpha-1(IV) chain, Arresten                                                                                                                                                              | Secreted, Extracellular space, Extracellular matrix, Basement membrane                                    | * | 0 |      |
| P02649 | 4   | 7   |      |      |     |     |     |      |     |     | ++    | ++    | Apolipoprotein E, Apo-E                                                                                                                                                                           | Secreted                                                                                                  | * | 0 |      |
| P02750 | 1   | 2   |      |      |     |     |     |      |     |     | +     | ++    | Leucine-rich alpha-2-glycoprotein, LRG                                                                                                                                                            | Secreted                                                                                                  | * | 0 |      |
| P02751 |     |     |      |      |     | 31  | 125 | 408  |     |     | +     | +++   | Fibronectin, FN, Cold-insoluble globulin, CIG                                                                                                                                                     | Secreted, Extracellular space, Extracellular matrix                                                       | * | 0 |      |
| P02765 |     | 3   |      |      |     |     |     |      |     |     | -     | -     | Alpha-2-HS-glycoprotein, Ba-alpha-2-glycoprotein, Alpha-2-Z-globulin, Fetuin-A                                                                                                                    | Secreted                                                                                                  | * | 0 |      |
| P02768 | 10  | 9   | 12   | 8    | 28  | 8   | 8   | 85   | 11  |     | +++   | ++    | Serum albumin                                                                                                                                                                                     | Secreted                                                                                                  | * | 0 |      |
| P02771 | 3   |     |      |      |     |     |     |      |     |     | -/?   | +/?   | Alpha-fetoprotein, Alpha-1-fetoprotein, Alpha-fetoglobulin                                                                                                                                        | Secreted                                                                                                  | * | 0 |      |
| P02774 |     | 11  |      |      |     |     |     |      |     |     | -     | ++    | Vitamin D-binding protein, DBP, VDB, Group-specific component, Gc-globulin                                                                                                                        | Secreted                                                                                                  | * | 0 |      |
| P02787 |     |     | 273  | 56   |     |     |     |      |     |     | ++    | ++    | Serotransferrin, Transferrin, Siderophilin, Beta-1-metal-binding globulin                                                                                                                         | Secreted                                                                                                  | * | 0 |      |
| P04004 | 11  | 8   | 8    | 10   |     | 9   |     |      | 9   |     | -     | -     | Vitronectin, Serum-spreading factor, S-protein, V75                                                                                                                                               | Secreted, Extracellular space                                                                             | * | 0 |      |
| P04062 | 57  | 81  | 32   | 45   | 63  | 135 | 32  | 86   | 7   | 23  | +++   | +++   | Glucosylceramidase, Beta-glucocerebrosidase, Acid beta-glucosidase, D-glucosyl-N-acylsphingosine glucosylase, Alglucerase, Imiglucerase                                                           | Lysosome membrane, Peripheral membrane protein, Interaction with saposin-C promotes membrane association. | * | 0 |      |
| P04216 |     |     |      |      |     | 97  | 268 |      | 147 | 90  | -/?   | -/?   | Thy-1 membrane glycoprotein, Thy-1 antigen, CDw90                                                                                                                                                 | Cell membrane, Lipid-anchor, GPI-anchor                                                                   | * | 0 | CD90 |
| P05090 |     |     | 5    |      |     |     |     |      |     |     |       |       | Apolipoprotein D, Apo-D, ApoD                                                                                                                                                                     | Secreted                                                                                                  | * | 0 |      |
| P05783 |     |     |      |      | 46  | 1   |     |      |     |     | +++   | +++   | Keratin, type I cytoskeletal 18, Cytokeratin-18, CK-18, Keratin-18, K18, Cell proliferation-inducing gene 46 protein                                                                              | Cytoplasm, Perinuclear region                                                                             | * | 0 |      |
| P05997 |     |     |      |      |     |     | 10  | 9    |     |     |       |       | Collagen alpha-2(V) chain                                                                                                                                                                         | Secreted, Extracellular space, Extracellular matrix                                                       | * | 0 |      |
| P06276 |     |     |      | 10   | 54  |     |     |      |     |     | +/?   | +/?   | Cholinesterase, Acetylcholine acylhydrolase, Choline esterase II, Butyrylcholine esterase, Pseudocholinesterase                                                                                   |                                                                                                           | * | 0 |      |
| P06280 | 3   | 7   |      | 4    |     |     | 19  |      |     |     | ++    | +++   | Alpha-galactosidase A, Alpha-D-galactoside galactohydrolase, Alpha-D-galactosidase A, Melibiase                                                                                                   | Lysosome                                                                                                  | * | 0 |      |
| P06865 | 108 | 224 | 91   | 109  | 104 | 63  | 141 | 181  | 74  | 76  |       |       | Beta-hexosaminidase subunit alpha, N-acetyl-beta-glucosaminidase subunit alpha, Beta-N-acetylhexosaminidase subunit alpha, Hexosaminidase subunit A                                               | Lysosome                                                                                                  | * | 0 |      |
| P07093 |     |     | 9    | 10   |     |     |     |      |     |     |       |       | Glia-derived nexin, GDN, Protease nexin I, PN-1, Protease inhibitor 7                                                                                                                             | Secreted, Extracellular space                                                                             | * | 0 |      |
| P07225 |     | 11  |      |      |     | 6   |     |      |     |     | ++    | ++    | Vitamin K-dependent protein S                                                                                                                                                                     | Secreted                                                                                                  | * | 0 |      |
| P07339 | 129 | 270 | 266  | 202  | 424 | 925 | 622 | 1452 | 407 | 344 | ++/?  | +++/? | Cathepsin D                                                                                                                                                                                       | Lysosome, Melanosome, Identified by mass spectrometry in melanosome fractions from stage I to stage IV.   | * | 0 |      |
| P07602 | 282 | 411 | 746  | 675  | 499 | 774 | 278 | 718  | 517 | 361 | +++   | +++   | Proactivator polypeptide                                                                                                                                                                          | Lysosome                                                                                                  | * | 0 |      |
| P07686 | 101 | 154 | 89   | 121  | 174 | 204 | 143 | 205  | 91  | 90  |       |       | Beta-hexosaminidase subunit beta, N-acetyl-beta-glucosaminidase subunit beta, Beta-N-acetylhexosaminidase subunit beta, Hexosaminidase subunit B, Cervical cancer proto-oncogene 7 protein, HCC-7 | Lysosome                                                                                                  | * | 0 |      |
| P07711 |     |     | 93   | 27   | 20  | 135 | 15  | 55   | 13  |     | -     | +/?   | Cathepsin L1, Major excreted protein, MEP                                                                                                                                                         | Lysosome                                                                                                  | * | 0 |      |
| P07858 | 48  | 53  | 316  | 147  | 22  | 132 | 176 | 424  | 100 | 42  | +++/? | +++/? | Cathepsin B, Cathepsin B1, APP secretase, APPS                                                                                                                                                    | Lysosome, Melanosome, Identified by mass spectrometry in melanosome fractions from stage I to stage IV.   | * | 0 |      |
| P07942 | 12  | 52  | 151  | 104  |     | 32  | 45  | 55   | 147 | 65  | +++   | ++    | Laminin subunit beta-1, Laminin B1 chain                                                                                                                                                          | Secreted, Extracellular space, Extracellular matrix, Basement membrane, Major component.                  | * | 0 |      |
| P07996 |     |     |      |      |     | 36  | 23  |      |     |     |       |       | Thrombospondin-1                                                                                                                                                                                  |                                                                                                           | * | 0 |      |
| P08123 |     |     |      |      |     |     |     | 4    |     |     |       |       | Collagen alpha-2(I) chain, Alpha-2 type I collagen                                                                                                                                                | Secreted, Extracellular space, Extracellular matrix                                                       | * | 0 |      |
| P08174 | 4   | 2   | 48   | 14   | 3   | 23  |     |      | 16  | 2   | +     | +++   | Complement decay-accelerating factor                                                                                                                                                              | Membrane, Single-pass type I membrane protein, Cell membrane, Lipid-anchor, GPI-anchor                    | * | 0 | CD55 |

## List of Glycoprotein Identified

| P08236 | 36  | 35  | 35  |     | 4   |     | 15  | 16  |     |     |     |     | Beta-glucuronidase, Beta-G1<br>Extracellular superoxide dismutase [Cu-Zn], EC-SOD | Lysosome<br>Secreted, Extracellular space, 99% of EC-SOD is anchored to heparan sulfate proteoglycans in the tissue interstitium, and 1% is located in the vasculature in equilibrium between the plasma and the endothelium. | *                                                                                                                                                                                                                                           | 0                                                                                                                            |   |   |       |
|--------|-----|-----|-----|-----|-----|-----|-----|-----|-----|-----|-----|-----|-----------------------------------------------------------------------------------|-------------------------------------------------------------------------------------------------------------------------------------------------------------------------------------------------------------------------------|---------------------------------------------------------------------------------------------------------------------------------------------------------------------------------------------------------------------------------------------|------------------------------------------------------------------------------------------------------------------------------|---|---|-------|
| P08294 |     |     | 54  | 30  |     |     |     |     |     |     |     |     | +                                                                                 | ++                                                                                                                                                                                                                            |                                                                                                                                                                                                                                             | *                                                                                                                            | 0 |   |       |
| P08571 |     |     |     |     | 43  | 84  |     |     |     |     |     |     | +                                                                                 | +                                                                                                                                                                                                                             | Monocyte differentiation antigen CD14, Myeloid cell-specific leucine-rich glycoprotein                                                                                                                                                      | Cell membrane, Lipid-anchor, GPI-anchor                                                                                      | * | 0 | CD14  |
| P08572 |     |     | 49  | 15  |     |     | 10  | 20  | 8   | 6   | -/? | -/? |                                                                                   |                                                                                                                                                                                                                               | Collagen alpha-2(IV) chain                                                                                                                                                                                                                  | Secreted, Extracellular space, Extracellular matrix, Basement membrane                                                       | * | 0 |       |
| P08582 |     |     | 11  | 12  | 27  | 74  |     |     |     |     |     |     | -                                                                                 | ++                                                                                                                                                                                                                            | Melanotransferrin, Melanoma-associated antigen p97                                                                                                                                                                                          | Cell membrane, Lipid-anchor, GPI-anchor                                                                                      | * | 0 | CD228 |
| P09486 |     |     | 25  | 87  | 35  | 59  |     |     |     |     |     |     | -                                                                                 | +                                                                                                                                                                                                                             | SPARC, Secreted protein acidic and rich in cysteine, Osteonectin, ON, Basement-membrane protein 40, BM-40                                                                                                                                   | Secreted, Extracellular space, Extracellular matrix, Basement membrane, In or around the basement membrane.                  | * | 0 |       |
| P09668 | 43  | 94  |     | 8   | 13  | 34  |     |     |     |     |     |     | -                                                                                 | +++                                                                                                                                                                                                                           | Cathepsin H                                                                                                                                                                                                                                 | Lysosome                                                                                                                     | * | 0 |       |
| POCOL5 |     |     |     |     |     | 26  |     |     |     |     |     |     | -/?                                                                               | +/?                                                                                                                                                                                                                           | Complement C4-B, Basic complement C4, C3 and PZP-like alpha-2-macroglobulin domain-containing protein 3                                                                                                                                     | Secreted                                                                                                                     | * | 0 |       |
| P10253 | 247 | 331 | 152 | 199 | 130 | 233 | 195 | 286 | 15  | 4   |     |     |                                                                                   |                                                                                                                                                                                                                               | Lysosomal alpha-glucosidase, Acid maltase, Aglucosidase alfa                                                                                                                                                                                | Lysosome                                                                                                                     | * | 0 |       |
| P10619 | 59  | 96  | 62  | 37  | 124 | 202 | 124 | 162 | 56  | 57  |     |     |                                                                                   |                                                                                                                                                                                                                               | Lysosomal protective protein, Cathepsin A, Carboxypeptidase C, Protective protein for beta-galactosidase                                                                                                                                    | Lysosome                                                                                                                     | * | 0 |       |
| P10646 | 4   | 4   |     |     |     |     |     |     |     |     |     |     | ++/?                                                                              | ++/+++/?                                                                                                                                                                                                                      | Tissue factor pathway inhibitor, TFPI, Lipoprotein-associated coagulation inhibitor, LACI, Extrinsic pathway inhibitor, EPI                                                                                                                 | Secreted                                                                                                                     | * | 0 |       |
| P10909 |     | 4   |     |     | 12  | 14  |     |     |     |     |     |     | -                                                                                 | +                                                                                                                                                                                                                             | Clusterin, Complement-associated protein SP-40,40, Complement cytolysis inhibitor, CLI, NA1/NA2, Apolipoprotein J, Apo-J, Testosterone-repressed prostate message 2, TRPM-2, Ku70-binding protein 1                                         | Secreted                                                                                                                     | * | 0 |       |
| P10915 |     |     | 153 | 20  |     |     |     |     |     |     |     |     |                                                                                   |                                                                                                                                                                                                                               | Hyaluronan and proteoglycan link protein 1, Proteoglycan link protein, Cartilage link protein, LP                                                                                                                                           | Secreted, Extracellular space, Extracellular matrix                                                                          | * | 0 |       |
| P11047 |     |     | 95  | 81  |     | 51  | 59  | 37  | 40  | 18  |     |     | -                                                                                 | +                                                                                                                                                                                                                             | Laminin subunit gamma-1, Laminin B2 chain                                                                                                                                                                                                   | Secreted, Extracellular space, Extracellular matrix, Basement membrane                                                       | * | 0 |       |
| P11117 | 19  | 22  | 6   |     | 10  | 17  | 10  | 35  |     | 13  |     |     |                                                                                   |                                                                                                                                                                                                                               | Lysosomal acid phosphatase, LAP                                                                                                                                                                                                             | Lysosome                                                                                                                     | * | 0 |       |
| P12109 |     |     | 67  | 24  |     |     | 64  | 6   | 34  | 246 | 76  |     | +/?                                                                               | -/?                                                                                                                                                                                                                           | Collagen alpha-1(VI) chain                                                                                                                                                                                                                  | Secreted, Extracellular space, Extracellular matrix                                                                          | * | 0 |       |
| P12110 |     |     |     |     |     |     |     | 3   | 6   |     |     |     | ++                                                                                | ++                                                                                                                                                                                                                            | Collagen alpha-2(VI) chain                                                                                                                                                                                                                  | Secreted, Extracellular space, Extracellular matrix, Membrane, Peripheral membrane protein, Recruited on membranes by CSPG4. | * | 0 |       |
| P13284 | 19  | 27  | 11  |     | 30  | 60  | 15  |     |     | 10  | 10  |     |                                                                                   |                                                                                                                                                                                                                               | Gamma-interferon-inducible lysosomal thiol reductase, Gamma-interferon-inducible protein IP-30                                                                                                                                              | Lysosome                                                                                                                     | * | 0 |       |
| P13611 |     |     | 24  | 19  |     | 23  | 72  | 147 |     |     |     |     | ++                                                                                | ++                                                                                                                                                                                                                            | Versican core protein, Large fibroblast proteoglycan, Chondroitin sulfate proteoglycan core protein 2, PG-M, Glial hyaluronate-binding protein, GHAP                                                                                        | Secreted, Extracellular space, Extracellular matrix                                                                          | * | 0 |       |
| P13674 |     |     |     |     |     |     |     |     | 13  |     |     |     | +++                                                                               | +++                                                                                                                                                                                                                           | Prolyl 4-hydroxylase subunit alpha-1, 4-PH alpha-1, Procollagen-proline,2-oxoglutarate-4-dioxygenase subunit alpha-1                                                                                                                        | Endoplasmic reticulum lumen                                                                                                  | * | 0 |       |
| P13987 | 134 | 165 | 277 | 17  | 132 | 353 | 106 | 253 | 46  | 26  |     |     | -                                                                                 | ++                                                                                                                                                                                                                            | CD59 glycoprotein, Membrane attack complex inhibition factor, MACIF, MAC-inhibitory protein, MAC-IP, Protectin, MEM43 antigen, Membrane inhibitor of reactive lysis, MIRL, 20 kDa homologous restriction factor, HRF-20, HRF20, 1F5 antigen | Cell membrane, Lipid-anchor, GPI-anchor, Secreted, Soluble form found in a number of tissues.                                | * | 0 | CD59  |
| P14314 | 104 | 130 | 374 | 53  | 29  | 376 | 208 | 175 | 138 | 23  |     |     | +++/?                                                                             | +++/?                                                                                                                                                                                                                         | Glucosidase 2 subunit beta, Glucosidase II subunit beta, Protein kinase C substrate, 60.1 kDa protein, heavy chain, PKCSH, 80K-H protein                                                                                                    | Endoplasmic reticulum                                                                                                        | * | 0 |       |
| P14384 |     |     |     |     |     | 14  |     | 6   |     |     |     |     | -                                                                                 | -                                                                                                                                                                                                                             | Carboxypeptidase M, CPM                                                                                                                                                                                                                     | Cell membrane, Lipid-anchor, GPI-anchor                                                                                      | * | 0 |       |
| P14625 | 10  | 23  | 250 | 120 | 34  | 18  |     |     | 127 | 14  |     |     | +++                                                                               | +++                                                                                                                                                                                                                           | Endoplasmic reticulum, Heat shock protein 90 kDa beta member 1, 94 kDa glucose-regulated protein, GRP94, gp96 homolog, Tumor rejection antigen 1                                                                                            | Endoplasmic reticulum lumen, Melanosome, Identified by mass spectrometry in melanosome fractions from stage I to stage IV.   | * | 0 |       |
| P15289 | 7   | 17  | 32  | 34  | 56  | 33  | 92  | 109 | 40  | 23  |     |     | +++                                                                               | +++                                                                                                                                                                                                                           | Arylsulfatase A, ASA, Cerebroside-sulfatase                                                                                                                                                                                                 | Lysosome                                                                                                                     | * | 0 |       |
| P15586 | 40  | 60  | 56  | 66  | 195 | 182 | 134 | 247 | 57  | 108 |     |     | ++                                                                                | ++                                                                                                                                                                                                                            | N-acetylglucosamine-6-sulfatase, G6S, Glucosamine-6-sulfatase                                                                                                                                                                               | Lysosome                                                                                                                     | * | 0 |       |
| P15848 |     |     |     |     | 7   | 7   | 9   | 28  |     |     |     |     |                                                                                   |                                                                                                                                                                                                                               | Arylsulfatase B, ASB, N-acetylgalactosamine-4-sulfatase, G4S                                                                                                                                                                                | Lysosome                                                                                                                     | * | 0 |       |
| P16112 |     |     | 34  | 20  |     |     |     |     |     |     |     |     |                                                                                   |                                                                                                                                                                                                                               | Aggrecan core protein, Cartilage-specific proteoglycan core protein, CSPCP, Chondroitin sulfate proteoglycan core protein 1                                                                                                                 | Secreted, Extracellular space, Extracellular matrix                                                                          | * | 0 |       |

## List of Glycoprotein Identified

|        |    |    |     |     |    |     |     |     |    |    |      |       |                                                                                                                                                                                                            |                                                                                                                                                                                                                                                                                                                                                                                                                                                                                                                                                                                                                                                           |   |   |      |
|--------|----|----|-----|-----|----|-----|-----|-----|----|----|------|-------|------------------------------------------------------------------------------------------------------------------------------------------------------------------------------------------------------------|-----------------------------------------------------------------------------------------------------------------------------------------------------------------------------------------------------------------------------------------------------------------------------------------------------------------------------------------------------------------------------------------------------------------------------------------------------------------------------------------------------------------------------------------------------------------------------------------------------------------------------------------------------------|---|---|------|
| P16278 | 53 | 98 | 22  | 57  | 69 | 107 | 86  | 67  | 25 | 53 | +/?  | ++/?  | Beta-galactosidase, Acid beta-galactosidase, Lactase, Elastin receptor 1                                                                                                                                   | Lysosome, Cytoplasm, Perinuclear region, Localized to the perinuclear area of the cytoplasm but not to lysosomes.                                                                                                                                                                                                                                                                                                                                                                                                                                                                                                                                         | * | 0 |      |
| P17050 | 3  | 17 | 37  | 45  | 43 | 47  | 113 | 96  |    | 11 | ++   | ++    | Alpha-N-acetylgalactosaminidase, Alpha-galactosidase B                                                                                                                                                     | Lysosome                                                                                                                                                                                                                                                                                                                                                                                                                                                                                                                                                                                                                                                  | * | 0 |      |
| P17405 |    |    |     |     |    |     |     | 9   |    |    | ++/? | +++/? | Sphingomyelin phosphodiesterase, Acid sphingomyelinase, sSMase                                                                                                                                             | Lysosome                                                                                                                                                                                                                                                                                                                                                                                                                                                                                                                                                                                                                                                  | * | 0 |      |
| P17900 | 3  | 7  |     | 21  | 29 | 40  |     | 43  | 21 | 11 | ++   | ++    | Ganglioside GM2 activator, GM2-AP, Cerebroside sulfate activator protein, Shingolipid activator protein 3, SAP-3                                                                                           | Lysosome                                                                                                                                                                                                                                                                                                                                                                                                                                                                                                                                                                                                                                                  | * | 0 |      |
| P17936 |    |    | 51  |     |    |     |     |     |    |    | +    | ++    | Insulin-like growth factor-binding protein 3, IGF-binding protein 3, IGFBP-3, IBP-3                                                                                                                        | Secreted                                                                                                                                                                                                                                                                                                                                                                                                                                                                                                                                                                                                                                                  | * | 0 |      |
| P20933 | 5  | 18 | 21  | 10  | 10 |     | 18  | 71  |    | 5  |      |       | N(4)-(beta-N-acetylglucosaminy)-L-asparaginase, Glycosylasparaginase, Aspartylglucosaminidase, AGA, N4-(N-acetyl-beta-glucosaminy)-L-asparagine amidase                                                    | Lysosome                                                                                                                                                                                                                                                                                                                                                                                                                                                                                                                                                                                                                                                  | * | 0 |      |
| P21589 | 9  | 18 | 7   |     | 5  | 43  | 98  | 110 | 63 | 13 | ++/? | +++/? | 5'-nucleotidase, Ecto-5'-nucleotidase, 5'-NT                                                                                                                                                               | Cell membrane, Lipid-anchor, GPI-anchor                                                                                                                                                                                                                                                                                                                                                                                                                                                                                                                                                                                                                   | * | 0 | CD73 |
| P22304 |    | 3  |     |     |    |     |     | 6   |    |    |      |       | Iduronate 2-sulfatase, Alpha-L-iduronate sulfate sulfatase, Idursulfase                                                                                                                                    | Lysosome                                                                                                                                                                                                                                                                                                                                                                                                                                                                                                                                                                                                                                                  | * | 0 |      |
| P24821 |    |    | 104 | 255 |    | 62  | 61  |     |    |    | -    | -     | Tenascin, TN, Tenascin-C, TN-C, Hexabrachion, Cytactin, Neuronectin, GMEEM, JI, Myotendinous antigen, Glioma-associated-extracellular matrix antigen, GP 150-225                                           | Secreted, Extracellular space, Extracellular matrix                                                                                                                                                                                                                                                                                                                                                                                                                                                                                                                                                                                                       | * | 0 |      |
| P25311 |    | 2  |     |     |    |     |     |     |    |    | ++   | ++    | Zinc-alpha-2-glycoprotein, Zn-alpha-2-glycoprotein, Zn-alpha-2-GP                                                                                                                                          | Secreted                                                                                                                                                                                                                                                                                                                                                                                                                                                                                                                                                                                                                                                  | * | 0 |      |
| P28799 | 19 | 18 |     |     | 16 | 46  | 14  | 28  |    |    | -    | -     | Granulins, Proepithelin, PEPI                                                                                                                                                                              | Secreted                                                                                                                                                                                                                                                                                                                                                                                                                                                                                                                                                                                                                                                  | * | 0 |      |
| P30533 | 13 | 9  | 8   |     |    | 11  |     |     |    |    | +++  | +++   | Alpha-2-macroglobulin receptor-associated protein, Alpha-2-MRAP, Low density lipoprotein receptor-related protein-associated protein 1, RAP                                                                | Endoplasmic reticulum, Cytoplasm, Cell surface, Intracellular and associated with cell surface receptors. Found in the endoplasmic reticulum.                                                                                                                                                                                                                                                                                                                                                                                                                                                                                                             | * | 0 |      |
| P34059 | 20 | 40 | 12  | 16  | 28 | 41  | 27  | 48  | 7  |    |      |       | N-acetylgalactosamine-6-sulfatase, N-acetylgalactosamine-6-sulfate sulfatase, Galactose-6-sulfate sulfatase, GalNAc6S sulfatase, Chondroitinsulfatase, Chondroitinase                                      | Lysosome                                                                                                                                                                                                                                                                                                                                                                                                                                                                                                                                                                                                                                                  | * | 0 |      |
| P35052 |    |    | 14  | 5   | 4  | 55  |     |     | 39 | 5  |      |       | Glypican-1                                                                                                                                                                                                 | Cell membrane, Lipid-anchor, GPI-anchor, Secreted, Extracellular space                                                                                                                                                                                                                                                                                                                                                                                                                                                                                                                                                                                    | * | 0 |      |
| P35475 |    | 6  |     |     |    |     |     | 12  |    |    |      |       | Alpha-L-iduronidase                                                                                                                                                                                        | Lysosome                                                                                                                                                                                                                                                                                                                                                                                                                                                                                                                                                                                                                                                  | * | 0 |      |
| P35555 |    |    |     |     |    |     | 6   |     |    |    | -    | -     | Fibrillin-1                                                                                                                                                                                                | Secreted, Extracellular space, Extracellular matrix                                                                                                                                                                                                                                                                                                                                                                                                                                                                                                                                                                                                       | * | 0 |      |
| P37198 |    | 7  |     |     |    |     |     |     |    |    | +++  | +++   | Nuclear pore glycoprotein p62, 62 kDa nucleoporin                                                                                                                                                          | Nucleus, Nuclear pore complex, Central region of the nuclear pore, within the transporter. During mitotic cell division, it associates with the poles of the mitotic spindle.                                                                                                                                                                                                                                                                                                                                                                                                                                                                             | * | 0 |      |
| P39060 |    |    |     |     |    | 18  | 2   | 18  |    |    | +/?  | +/?   | Collagen alpha-1(XVIII) chain                                                                                                                                                                              | Secreted, Extracellular space, Extracellular matrix                                                                                                                                                                                                                                                                                                                                                                                                                                                                                                                                                                                                       | * | 0 |      |
| P41222 |    |    |     |     | 14 | 26  |     |     |    |    | +/?  | ++/?  | Prostaglandin-H2 D-isomerase, Lipocalin-type prostaglandin-D synthase, Glutathione-independent PGD synthetase, Prostaglandin-D2 synthase, PGD2 synthase, PGDS2, PGDS, Beta-trace protein, Cerebrin-28      | Rough endoplasmic reticulum, Nucleus membrane, Golgi apparatus, Cytoplasm, Perinuclear region, Secreted, Detected on rough endoplasmic reticulum of arachnoid and meningioma cells. Localized to the nuclear envelope, Golgi apparatus, secretory vesicles and spherical cytoplasmic structures in arachnoid trabecular cells, and to circular cytoplasmic structures in meningeal macrophages and perivascular microglial cells. In oligodendrocytes, localized to the rough endoplasmic reticulum and nuclear envelope. In retinal pigment epithelial cells, localized to distinct cytoplasmic domains including the perinuclear region. Also secreted. | * | 0 |      |
| P42785 |    |    |     | 8   |    | 8   | 63  | 136 | 5  | 10 | ++   | +     | Lysosomal Pro-X carboxypeptidase, Prolylcarboxypeptidase, PRCP, Proline carboxypeptidase, Angiotensinase C, Lysosomal carboxypeptidase C                                                                   | Lysosome                                                                                                                                                                                                                                                                                                                                                                                                                                                                                                                                                                                                                                                  | * | 0 |      |
| P43251 | 6  | 11 |     |     |    |     | 6   | 6   |    |    |      |       | Biotinidase, Biotinase                                                                                                                                                                                     | Secreted, Extracellular space                                                                                                                                                                                                                                                                                                                                                                                                                                                                                                                                                                                                                             | * | 0 |      |
| P48307 |    |    |     |     |    | 20  |     |     |    |    | -/?  | -/?   | Tissue factor pathway inhibitor 2, TFPI-2, Placental protein 5, PP5                                                                                                                                        | Secreted                                                                                                                                                                                                                                                                                                                                                                                                                                                                                                                                                                                                                                                  | * | 0 |      |
| P50454 | 5  | 28 |     |     | 50 | 91  | 41  | 37  | 93 | 15 | -    | +++   | Serp1 H1, Collagen-binding protein, Colligin, 47 kDa heat shock protein, Rheumatoid arthritis-related antigen RA-A47, Arsenic-transactivated protein 3, AsTP3, Cell proliferation-inducing gene 14 protein | Endoplasmic reticulum lumen                                                                                                                                                                                                                                                                                                                                                                                                                                                                                                                                                                                                                               | * | 0 |      |
| P50897 | 22 | 43 | 76  | 32  | 12 | 43  | 67  | 188 | 10 | 10 |      |       | Palmitoyl-protein thioesterase 1, PPT-1, Palmitoyl-protein hydrolase 1                                                                                                                                     | Lysosome                                                                                                                                                                                                                                                                                                                                                                                                                                                                                                                                                                                                                                                  | * | 0 |      |

## List of Glycoprotein Identified

|        |     |     |    |     |     |     |     |     |    |    |       |      |                                                                                                                                                                                                                                                     |                                                                                                                                       |   |   |       |
|--------|-----|-----|----|-----|-----|-----|-----|-----|----|----|-------|------|-----------------------------------------------------------------------------------------------------------------------------------------------------------------------------------------------------------------------------------------------------|---------------------------------------------------------------------------------------------------------------------------------------|---|---|-------|
| P51688 |     | 15  |    |     | 34  | 19  | 49  | 32  | 14 | 45 |       |      | N-sulphoglucosamine sulphohydrolase, Sulfo-glucosamine sulfamidase, Sulphamidase                                                                                                                                                                    | Lysosome                                                                                                                              | * | 0 |       |
| P53634 | 57  | 62  | 11 | 18  | 67  | 62  | 92  | 150 | 10 |    |       |      | Dipeptidyl-peptidase 1, Dipeptidyl-peptidase I, DPP-I, DPP1, Cathepsin C, Cathepsin J, Dipeptidyl transferase                                                                                                                                       | Lysosome                                                                                                                              | * | 0 |       |
| P54802 | 2   | 7   |    |     |     | 2   | 3   |     |    |    |       |      | Alpha-N-acetylglucosaminidase, N-acetyl-alpha-glucosaminidase, NAG                                                                                                                                                                                  |                                                                                                                                       | * | 0 |       |
| P55290 |     |     |    |     |     |     |     |     | 19 | 7  | -/?   | -/?  | Cadherin-13, Truncated cadherin, T-cadherin, T-cad, Heart cadherin, H-cadherin, P105                                                                                                                                                                | Cell membrane, Lipid-anchor, GPI-anchor                                                                                               | * | 0 |       |
| P56159 |     |     |    |     |     | 21  | 14  | 22  |    |    |       |      | GDNF family receptor alpha-1, GFR-alpha-1, GDNF receptor alpha, GDNFR-alpha, TGF-beta-related neurotrophic factor receptor 1, RET ligand 1                                                                                                          | Cell membrane, Lipid-anchor, GPI-anchor                                                                                               | * | 0 |       |
| P61769 |     |     |    |     | 6   | 9   |     |     |    |    | +     | ++   | Beta-2-microglobulin                                                                                                                                                                                                                                | Secreted                                                                                                                              | * | 0 |       |
| P61916 | 22  | 49  | 25 | 33  | 47  | 154 | 140 | 463 | 68 | 55 | ++    | +++  | Epididymal secretory protein E1, Niemann-Pick disease type C2 protein, hE1                                                                                                                                                                          | Secreted                                                                                                                              | * | 0 |       |
| P80188 | 33  | 25  |    |     |     | 19  |     |     |    |    | -     | -    | Neutrophil gelatinase-associated lipocalin, NGAL, p25, 25 kDa alpha-2-microglobulin-related subunit of MMP-9, Lipocalin-2, Oncogene 24p3                                                                                                            | Secreted                                                                                                                              | * | 0 |       |
| P98160 | 7   | 5   |    |     |     |     |     |     |    |    | -/?   | ++/? | Basement membrane-specific heparan sulfate proteoglycan core protein, HSPG, Perlecan, PLC                                                                                                                                                           | Secreted, Extracellular space, Extracellular matrix, Basement membrane                                                                | * | 0 |       |
| Q01082 |     | 4   |    |     |     |     | 19  |     |    |    | ++    | ++   | Spectrin beta chain, brain 1, Spectrin, non-erythroid beta chain 1, Beta-II spectrin, Fodrin beta chain                                                                                                                                             | Cytoplasm, Cytoskeleton, Cell membrane, Peripheral membrane protein                                                                   | * | 0 |       |
| Q01459 |     | 15  |    |     |     |     | 18  | 36  |    |    | +++/? | ++/? | Di-N-acetylchitinase                                                                                                                                                                                                                                | Lysosome                                                                                                                              | * | 0 |       |
| Q02083 |     |     |    |     | 6   | 8   |     |     |    |    |       |      | N-acyl ethanolamine-hydrolyzing acid amidase, N-acyl sphingosine amidohydrolase-like, ASAH-like protein, Acid ceramidase-like protein                                                                                                               | Lysosome                                                                                                                              | * | 0 |       |
| Q02388 |     |     |    |     |     | 10  |     |     |    |    | -/?   | ++/? | Collagen alpha-1(VII) chain, Long-chain collagen, LC collagen                                                                                                                                                                                       | Secreted, Extracellular space, Extracellular matrix, Basement membrane                                                                | * | 0 |       |
| Q02809 |     | 6   | 72 | 139 |     | 85  | 17  | 17  | 86 | 23 |       |      | Procollagen-lysine 2-oxoglutarate 5-dioxygenase 1, Lysyl hydroxylase 1, LH1                                                                                                                                                                         | Rough endoplasmic reticulum membrane, Peripheral membrane protein                                                                     | * | 0 |       |
| Q03405 | 4   | 5   |    |     | 5   | 19  | 7   |     |    |    |       |      | Urokinase plasminogen activator surface receptor, uPAR, U-PAR, Monocyte activation antigen Mo3                                                                                                                                                      | Cell membrane, Lipid-anchor, GPI-anchor, Secreted                                                                                     | * | 0 | CD87  |
| Q05707 |     |     |    |     |     | 18  |     |     |    |    |       |      | Collagen alpha-1(XIV) chain, Undulin                                                                                                                                                                                                                | Secreted, Extracellular space, Extracellular matrix                                                                                   | * | 0 |       |
| Q08380 | 124 | 210 | 10 |     | 100 | 102 | 55  | 133 |    |    | -     | ++   | Galectin-3-binding protein, Lectin galactoside-binding soluble 3-binding protein, Mac-2-binding protein, Mac-2 BP, MAC2BP, Tumor-associated antigen 90K, Basement membrane autoantigen p105                                                         | Secreted, Secreted, Extracellular space, Extracellular matrix                                                                         | * | 0 |       |
| Q08431 | 23  | 10  | 28 |     |     |     |     |     |    |    | +     | +++  | Lactadherin, Milk fat globule-EGF factor 8, MFG-E8, HMFG, Breast epithelial antigen BA46, MFGM                                                                                                                                                      | Membrane, Peripheral membrane protein                                                                                                 | * | 0 |       |
| Q10588 |     |     |    |     | 3   | 28  |     |     |    |    |       |      | ADP-ribosyl cyclase 2, Cyclic ADP-ribose hydrolase 2, cADPr hydrolase 2, Bone marrow stromal antigen 1, BST-1                                                                                                                                       | Cell membrane, Lipid-anchor, GPI-anchor                                                                                               | * | 0 | CD157 |
| Q12805 |     |     |    |     |     | 45  |     |     |    |    |       |      | EGF-containing fibulin-like extracellular matrix protein 1, Fibulin-3, FIBL-3, Fibrillin-like protein, Extracellular protein S1-5                                                                                                                   | Secreted                                                                                                                              | * | 0 |       |
| Q12841 |     |     |    |     |     | 27  | 11  |     |    |    |       |      | Follistatin-related protein 1, Follistatin-like 1                                                                                                                                                                                                   | Secreted                                                                                                                              | * | 0 |       |
| Q13449 |     |     |    |     |     |     |     |     | 10 |    |       |      | Limbic system-associated membrane protein, LSAMP                                                                                                                                                                                                    | Cell membrane, Lipid-anchor, GPI-anchor                                                                                               | * | 0 |       |
| Q13510 | 16  | 48  | 39 | 23  | 46  | 34  | 49  | 111 | 5  | 29 | +++   | ++   | Acid ceramidase, AC, Acylsphingosine deacylase, N-acylsphingosine amidohydrolase, Putative 32 kDa heart protein, PHP32                                                                                                                              | Lysosome                                                                                                                              | * | 0 |       |
| Q13751 | 10  | 8   |    |     |     |     | 10  |     |    |    | ++/?  | ++/? | Laminin subunit beta-3, Laminin 5 beta 3, Laminin B1k chain, Kalinin B1 chain                                                                                                                                                                       | Secreted, Extracellular space, Extracellular matrix, Basement membrane                                                                | * | 0 |       |
| Q13753 | 6   | 4   |    |     |     |     |     |     |    |    | +++/? | ++/? | Laminin subunit gamma-2, Laminin 5 gamma 2 subunit, Kalinin/nicein/epiligrin 100 kDa subunit, Laminin B2t chain, Cell-scattering factor 140 kDa subunit, CSF 140 kDa subunit, Large adhesive scatter factor 140 kDa subunit, Ladsin 140 kDa subunit | Secreted, Extracellular space, Extracellular matrix, Basement membrane, Major component.                                              | * | 0 |       |
| Q14508 |     |     |    |     | 17  | 40  |     |     |    |    |       |      | WAP four-disulfide core domain protein 2, Major epididymis-specific protein E4, Epididymal secretory protein E4, Putative protease inhibitor WAP5                                                                                                   | Secreted                                                                                                                              | * | 0 |       |
| Q14697 | 6   | 6   | 23 | 37  |     |     |     |     | 7  |    |       |      | Neutral alpha-glucosidase AB, Glucosidase II subunit alpha, Alpha-glucosidase 2                                                                                                                                                                     | Endoplasmic reticulum, Golgi apparatus, Melanosome, Identified by mass spectrometry in melanosome fractions from stage I to stage IV. | * | 0 |       |
| Q15293 |     | 5   |    | 34  | 21  |     |     |     | 29 |    |       |      | Reticulocalbin-1                                                                                                                                                                                                                                    | Endoplasmic reticulum lumen                                                                                                           | * | 0 |       |
| Q16270 |     |     |    |     | 9   | 69  | 99  | 108 |    |    | +     | ++   | Insulin-like growth factor-binding protein 7, IGF-binding protein 7, IGFBP-7, IBP-7, MAC25 protein, Prostacyclin-stimulating factor, PGI2-stimulating factor, IGFBP-rP1                                                                             | Secreted                                                                                                                              | * | 0 |       |

## List of Glycoprotein Identified

|        |     |     |     |     |    |     |     |     |     |     |       |       |                                                                                                                                                                                                                |                                                                                                                                                                                                                                                                                                 |   |   |  |
|--------|-----|-----|-----|-----|----|-----|-----|-----|-----|-----|-------|-------|----------------------------------------------------------------------------------------------------------------------------------------------------------------------------------------------------------------|-------------------------------------------------------------------------------------------------------------------------------------------------------------------------------------------------------------------------------------------------------------------------------------------------|---|---|--|
| Q16363 |     |     | 52  | 55  |    |     |     |     | 6   |     | ++/?  | +++/? | Laminin subunit alpha-4                                                                                                                                                                                        | Secreted, Extracellular space, Extracellular matrix, Basement membrane, Major component.                                                                                                                                                                                                        | * | 0 |  |
| Q16610 |     |     | 270 | 122 |    |     |     |     |     |     |       |       | Extracellular matrix protein 1, Secretory component p85                                                                                                                                                        | Secreted, Extracellular space, Extracellular matrix                                                                                                                                                                                                                                             | * | 0 |  |
| Q16787 | 24  | 12  |     |     |    |     |     |     |     |     | ++/?  | ++/?  | Laminin subunit alpha-3, Epiligrin 170 kDa subunit, E170, Nicein subunit alpha                                                                                                                                 | Secreted, Extracellular space, Extracellular matrix, Basement membrane, Major component.                                                                                                                                                                                                        | * | 0 |  |
| Q7Z3B1 |     |     |     |     |    |     |     | 2   | 1   |     | +     | -     | Neuronal growth regulator 1                                                                                                                                                                                    | Cell membrane, Lipid-anchor, GPI-anchor                                                                                                                                                                                                                                                         | * | 0 |  |
| Q86YB8 |     |     | 22  | 24  |    |     |     |     |     |     |       |       | ERO1-like protein beta, ERO1-Lbeta, Oxidoreductin-1-Lbeta, Endoplasmic oxidoreductin-1-like protein B                                                                                                          | Endoplasmic reticulum membrane, Peripheral membrane protein, The association with TXNDC4 may be essential for its retention in the endoplasmic reticulum.                                                                                                                                       | * | 0 |  |
| Q8N2G4 |     |     |     |     |    |     |     | 6   |     |     |       |       | Ly6/PLAUR domain-containing protein 1, Putative HeLa tumor suppressor, PHTS                                                                                                                                    | Cell membrane, Lipid-anchor, GPI-anchor                                                                                                                                                                                                                                                         | * | 0 |  |
| Q8N474 |     |     | 21  | 2   |    |     |     |     |     |     | +++/? | +++/? | Secreted frizzled-related protein 1, sFRP-1, Frizzled-related protein 1, FRP-1, Secreted apoptosis-related protein 2, SARP-2                                                                                   | Secreted, Cell membrane or extracellular matrix-associated. Released by heparin-binding.                                                                                                                                                                                                        | * | 0 |  |
| Q8NBJ7 | 12  | 50  | 106 | 62  | 7  | 78  | 59  | 29  | 9   |     |       |       | Sulfatase-modifying factor 2, C-alpha-formylglycine-generating enzyme 2                                                                                                                                        | Endoplasmic reticulum lumen                                                                                                                                                                                                                                                                     | * | 0 |  |
| Q8NBK3 |     |     |     |     |    |     | 13  | 5   |     |     |       |       | Sulfatase-modifying factor 1, C-alpha-formylglycine-generating enzyme 1                                                                                                                                        | Endoplasmic reticulum lumen                                                                                                                                                                                                                                                                     | * | 0 |  |
| Q8NCC3 |     |     | 2   |     | 19 | 12  | 30  | 37  |     | 10  |       |       | 1-O-acylceramide synthase, ACS, Lysosomal phospholipase A2, Lysophospholipase 3, LPLA2, LCAT-like lysophospholipase, LLPL                                                                                      | Lysosome, Secreted                                                                                                                                                                                                                                                                              | * | 0 |  |
| Q92484 |     |     |     |     |    |     | 4   | 20  |     |     |       |       | Acid sphingomyelinase-like phosphodiesterase 3a, ASM-like phosphodiesterase 3a                                                                                                                                 | Secreted                                                                                                                                                                                                                                                                                        | * | 0 |  |
| Q92485 | 34  | 87  |     |     | 15 | 50  |     |     |     |     |       |       | Acid sphingomyelinase-like phosphodiesterase 3b, ASM-like phosphodiesterase 3b                                                                                                                                 | Secreted                                                                                                                                                                                                                                                                                        | * | 0 |  |
| Q92820 | 50  | 53  | 101 | 92  | 77 | 141 | 130 | 230 | 31  | 20  | +++/? | +++/? | Gamma-glutamyl hydrolase, Gamma-Glu-X carboxypeptidase, Conjugase, GH                                                                                                                                          | Secreted, Extracellular space, Lysosome, Melanosome, While its intracellular location is primarily the lysosome, most of the enzyme activity is secreted. Identified by mass spectrometry in melanosome fractions from stage I to stage IV.                                                     | * | 0 |  |
| Q92876 | 6   | 10  |     |     |    |     |     |     |     |     |       |       | Kallikrein-6, Protease M, Neurosin, Zyme, SP59, Serine protease 9, Serine protease 18                                                                                                                          | Secreted, Nucleus, Nucleolus, Cytoplasm, Mitochondrion, Microsome, In brain, detected in the nucleus of glial cells and in the nucleus and cytoplasm of neurons. Detected in the mitochondrial and microsomal fractions of HEK-293 cells and released into the cytoplasm following cell stress. | * | 0 |  |
| Q96AY3 |     |     | 102 | 85  | 7  | 79  | 68  | 20  | 10  | 4   |       |       | FK506-binding protein 10, Peptidyl-prolyl cis-trans isomerase, PPIase, Rotamase, Immunophilin FKBP65, 65 kDa FK506-binding protein, FKBP65                                                                     | Endoplasmic reticulum lumen                                                                                                                                                                                                                                                                     | * | 0 |  |
| Q96CG8 |     |     | 30  | 36  |    |     |     |     |     |     |       |       | Collagen triple helix repeat-containing protein 1, NMTC1 protein                                                                                                                                               | Secreted, Extracellular space, Extracellular matrix                                                                                                                                                                                                                                             | * | 0 |  |
| Q96D15 |     |     | 5   | 39  | 5  |     |     |     |     |     |       |       | Reticulocalbin-3, EF-hand calcium-binding protein RLP49                                                                                                                                                        | Endoplasmic reticulum lumen                                                                                                                                                                                                                                                                     | * | 0 |  |
| Q96HE7 | 147 | 189 | 254 | 193 | 7  | 141 | 153 | 171 | 290 | 121 |       |       | ERO1-like protein alpha, ERO1-Lalpha, ERO1-L, Oxidoreductin-1-Lalpha, Endoplasmic oxidoreductin-1-like protein                                                                                                 | Endoplasmic reticulum membrane, Peripheral membrane protein, The association with TXNDC4 is essential for its retention in the endoplasmic reticulum.                                                                                                                                           | * | 0 |  |
| Q96JB6 |     |     | 12  |     |    |     |     |     |     |     |       |       | Lysyl oxidase homolog 4, Lysyl oxidase-like protein 4, Lysyl oxidase-related protein C                                                                                                                         | Secreted, Extracellular space                                                                                                                                                                                                                                                                   | * | 0 |  |
| Q99519 | 7   | 21  |     | 8   | 47 | 126 | 46  | 59  | 52  | 45  | +/?   | +/?   | Sialidase-1, Lysosomal sialidase, N-acetyl-alpha-neuraminidase 1, Acetylneuraminyl hydrolase, G9 sialidase                                                                                                     | Lysosome membrane, Peripheral membrane protein, Lysosome lumen, Cell membrane, Cytoplasmic vesicle, Localized not only on the inner side of the lysosomal membrane and in the lysosomal lumen, but also on the plasma membrane and in intracellular vesicles.                                   | * | 0 |  |
| Q99538 | 15  | 25  | 29  | 20  | 10 | 23  | 22  | 24  |     |     | +     | ++    | Legumain, Asparaginyl endopeptidase, Protease, cysteine 1                                                                                                                                                      | Lysosome                                                                                                                                                                                                                                                                                        | * | 0 |  |
| Q99715 |     |     |     |     |    | 27  |     | 4   |     |     | +/?   | +/?   | Collagen alpha-1(XII) chain                                                                                                                                                                                    | Secreted, Extracellular space, Extracellular matrix                                                                                                                                                                                                                                             | * | 0 |  |
| Q99988 | 12  | 16  | 404 | 42  |    | 12  |     |     |     |     | +     | +     | Growth/differentiation factor 15, GDF-15, Placental bone morphogenetic protein, Placental TGF-beta, Macrophage inhibitory cytokine 1, MIC-1, Prostate differentiation factor, NSAID-regulated protein 1, NRG-1 | Secreted                                                                                                                                                                                                                                                                                        | * | 0 |  |
| Q9BRK5 |     |     |     | 2   | 17 |     |     |     |     |     | +++/? | +++/? | 45 kDa calcium-binding protein, Cab45, Stromal cell-derived factor 4, SDF-4                                                                                                                                    | Golgi apparatus lumen                                                                                                                                                                                                                                                                           | * | 0 |  |

List of Glycoprotein Identified

|        |     |     |     |     |    |     |     |     |     |     |     |                                                                                                                                                                                                                        |                                                                                                          |                                                                                                                                                                                                                                                                                                                                                                                    |   |   |
|--------|-----|-----|-----|-----|----|-----|-----|-----|-----|-----|-----|------------------------------------------------------------------------------------------------------------------------------------------------------------------------------------------------------------------------|----------------------------------------------------------------------------------------------------------|------------------------------------------------------------------------------------------------------------------------------------------------------------------------------------------------------------------------------------------------------------------------------------------------------------------------------------------------------------------------------------|---|---|
| Q9GZM7 | 20  | 6   |     |     |    |     | 10  |     |     |     |     | Tubulointerstitial nephritis antigen-like, Tubulointerstitial nephritis antigen-related protein, TIN Ag-related protein, TIN-Ag-RP, Glucocorticoid-inducible protein 5, Oxidized LDL-responsive gene 2 protein, OLRG-2 | Secreted                                                                                                 | *                                                                                                                                                                                                                                                                                                                                                                                  | 0 |   |
| Q9H173 |     |     | 6   |     | 5  |     |     |     |     | ++  | +++ | Nucleotide exchange factor SIL1, BiP-associated protein, BAP                                                                                                                                                           | Endoplasmic reticulum lumen                                                                              | *                                                                                                                                                                                                                                                                                                                                                                                  | 0 |   |
| Q9H3G5 | 42  | 47  |     | 12  | 29 |     |     |     | 5   | +++ | +++ | Probable serine carboxypeptidase CPVL, Carboxypeptidase, vitellogenic-like, Vitellogenic carboxypeptidase-like protein, VCP-like protein, HVLP                                                                         |                                                                                                          | *                                                                                                                                                                                                                                                                                                                                                                                  | 0 |   |
| Q9HAT2 | 40  | 44  | 24  |     | 65 | 59  | 26  | 64  |     |     |     | Sialate O-acetyltransferase, Sialic acid-specific 9-O-acetyltransferase, H-Lse                                                                                                                                         | Lysosome                                                                                                 | *                                                                                                                                                                                                                                                                                                                                                                                  | 0 |   |
| Q9HB40 |     |     |     |     |    |     | 6   | 18  |     |     |     | Retinoid-inducible serine carboxypeptidase, Serine carboxypeptidase 1                                                                                                                                                  | Secreted                                                                                                 | *                                                                                                                                                                                                                                                                                                                                                                                  | 0 |   |
| Q9NYU2 | 4   | 6   | 25  | 20  |    |     |     |     |     |     |     | UDP-glucose:glycoprotein glucosyltransferase 1, UDP-glucose ceramide glucosyltransferase-like 1, UDP-Glc:glycoprotein glucosyltransferase, HUGT1                                                                       | Endoplasmic reticulum lumen, Endoplasmic reticulum-Golgi intermediate compartment                        | *                                                                                                                                                                                                                                                                                                                                                                                  | 0 |   |
| Q9UBP4 |     |     |     |     |    |     |     | 6   | 6   | +/? | +/? | Dickkopf-related protein 3, Dickkopf-3, Dkk-3, hDkk-3                                                                                                                                                                  | Secreted                                                                                                 | *                                                                                                                                                                                                                                                                                                                                                                                  | 0 |   |
| Q9UBR2 | 13  | 38  | 18  | 55  | 69 | 85  | 216 | 306 | 34  | 23  |     | Cathepsin Z, Cathepsin X, Cathepsin P                                                                                                                                                                                  | Lysosome                                                                                                 | *                                                                                                                                                                                                                                                                                                                                                                                  | 0 |   |
| Q9UBS4 | 4   | 13  |     | 22  |    |     |     |     | 6   |     | +++ | DnaJ homolog subfamily B member 11, ER-associated dnaJ protein 3, ERj3p, ERdj3, ER-associated Hsp40 co-chaperone, ER-associated DNAJ, HEDJ, hDj9, PWP1-interacting protein 4, APOBEC1-binding protein 2, ABBP-2        | Endoplasmic reticulum lumen, Associated with the ER membrane in a C-terminally epitope-tagged construct. | *                                                                                                                                                                                                                                                                                                                                                                                  | 0 |   |
| Q9UHG3 | 11  | 11  | 11  |     |    | 21  | 7   | 64  | 27  |     |     | Prenylcysteine oxidase 1, Prenylcysteine lyase                                                                                                                                                                         | Lysosome                                                                                                 | *                                                                                                                                                                                                                                                                                                                                                                                  | 0 |   |
| Q9UHL4 | 63  | 116 | 48  | 72  | 50 | 93  | 118 | 195 | 2   | 34  |     | Dipeptidyl-peptidase 2, Dipeptidyl-peptidase II, DPP II, Dipeptidyl aminopeptidase II, Quiescent cell proline dipeptidase, Dipeptidyl peptidase 7                                                                      | Lysosome, Cytoplasmic vesicle                                                                            | *                                                                                                                                                                                                                                                                                                                                                                                  | 0 |   |
| Q9UM22 |     |     | 18  | 14  | 43 | 55  | 54  | 59  | 23  | 26  |     | Mammalian ependymin-related protein 1, MERP-1, Upregulated in colorectal cancer gene 1 protein                                                                                                                         | Secreted                                                                                                 | *                                                                                                                                                                                                                                                                                                                                                                                  | 0 |   |
| Q9UMR5 | 3   | 2   |     |     | 8  | 18  | 5   | 32  |     |     |     | Lysosomal thioesterase PPT2, PPT-2, S-thioesterase G14                                                                                                                                                                 | Lysosome                                                                                                 | *                                                                                                                                                                                                                                                                                                                                                                                  | 0 |   |
| Q9UNW1 | 36  | 41  | 13  | 8   |    | 19  | 2   | 22  |     |     |     | Multiple inositol polyphosphate phosphatase 1, Inositol (1,3,4,5)-tetrakisphosphate 3-phosphatase, Ins(1,3,4,5)P(4) 3-phosphatase                                                                                      | Endoplasmic reticulum lumen                                                                              | *                                                                                                                                                                                                                                                                                                                                                                                  | 0 |   |
| Q9Y251 | 2   | 7   |     |     |    |     |     |     |     |     | ++  | ++                                                                                                                                                                                                                     | Heparanase, Heparanase-1, Hpa1, Endoglycoronidase                                                        | Lysosome membrane, Peripheral membrane protein, Secreted, Secreted, internalised and transferred to late endosomes/lysosomes as a proheparanase. In lysosomes, it is processed into the active form, the heparanase. The uptake or internalisation of proheparanase is mediated by HSPGs. Heparin appears to be a competitor and retain proheparanase in the extracellular medium. | * | 0 |
| Q9Y2E5 |     | 13  |     |     | 27 | 17  | 36  | 47  |     |     |     |                                                                                                                                                                                                                        | Epididymis-specific alpha-mannosidase, Mannosidase alpha class 2B member 2                               | Secreted                                                                                                                                                                                                                                                                                                                                                                           | * | 0 |
| Q9Y2G5 |     |     | 9   | 35  |    |     |     |     |     |     |     |                                                                                                                                                                                                                        | GDP-fucose protein O-fucosyltransferase 2, Peptide O-fucosyltransferase 2, O-FucT-2                      | Endoplasmic reticulum                                                                                                                                                                                                                                                                                                                                                              | * | 0 |
| Q9Y4L1 | 230 | 468 | 570 | 572 | 27 | 300 | 156 | 143 | 306 | 85  |     |                                                                                                                                                                                                                        | Hypoxia up-regulated protein 1, 150 kDa oxygen-regulated protein, Orp150                                 | Endoplasmic reticulum lumen                                                                                                                                                                                                                                                                                                                                                        | * | 0 |
| Q9Y680 |     |     |     |     |    |     | 33  | 19  |     |     | +   | ++                                                                                                                                                                                                                     | FK506-binding protein 7, Peptidyl-prolyl cis-trans isomerase, PPIase, Rotamase, FKBP-23                  | Endoplasmic reticulum lumen                                                                                                                                                                                                                                                                                                                                                        | * | 0 |
| Q9Y6C2 |     |     | 23  | 79  |    |     |     |     |     |     | -   | -                                                                                                                                                                                                                      | EMILIN-1, Elastin microfibril interface-located protein 1, Elastin microfibril interfacer 1              | Secreted, Extracellular space, Extracellular matrix, Found mainly at the interface between amorphous elastin and microfibrils.                                                                                                                                                                                                                                                     | * | 0 |
