# Supplementary material
Source: PubMed Central journal article supplement (PMC2735218)
Supplement: NIHMS132564-supplement-7_si_007.pdf [file NIHMS132564-supplement-7_si_007.pdf]

# List of Glycopeptide Identified

## GlycoPeptide Identified in TPC-1Cell Line

Experiment: TPC1-p13-p15-PNGF

Peak List Generator Version: BioWorks 3.3.1  
 Charge States Calculated: yes  
 Database Set: Database Name: the Sprot\_060206 database  
 Version: 06/26/06  
 Taxonomy: Homo sapiens  
 Number of Proteins: 14164  
 Search Engine Set: 2 Search Engines  
 Search Engine: Mascot; Version: 2.1.03  
 Fragment Tolerance: 0.80 Da (Monoisotopic)  
 Parent Tolerance: 1.6 Da (Monoisotopic)  
 Fixed Modifications: +57 on C (Carbamidomethyl)  
 Variable Modifications: +1 on N (Deamidation), +16 on M (Oxidation)  
 Database: the Sprot\_060206 database (selected for Homo sapiens, unknown version, 14164 entries)  
 Digestion Enzyme: Trypsin; Max Missed Cleavages: 2  
 Search Engine: XI Tandem; Version: 2007.01.01.1  
 Fragment Tolerance: 0.100 Da (Monoisotopic)  
 Parent Tolerance: 1.6 Da (Monoisotopic)  
 Fixed Modifications: +57 on C (Carbamidomethyl)  
 Variable Modifications: +1 on N (Deamidation), +16 on M (Oxidation)  
 Database: a subset of the uniprot\_sprot\_060206-oval database  
 Digestion Enzyme: Trypsin; Max Missed Cleavages: 2  
 Scaffold Version: Scaffold-2\_00\_00\_final

| Protein name                                                                                                                                                                                                                                        | Swiss-Prot Accession Name | Protein molecular weight (Da) | Peptide sequence                         | Previous amino acid | Next amino acid | Best Peptide identification probability | Best Mascot Ion score | Best Mascot Identity score | Best XI Tandem - log(e) score | Number of identified +2H spectra | Number of identified +3H spectra | Calculated +1H Peptide Mass (AMU) | Peptide start index | Peptide stop index | N-linked Site | Potential N-linked site |
|-----------------------------------------------------------------------------------------------------------------------------------------------------------------------------------------------------------------------------------------------------|---------------------------|-------------------------------|------------------------------------------|---------------------|-----------------|-----------------------------------------|-----------------------|----------------------------|-------------------------------|----------------------------------|----------------------------------|-----------------------------------|---------------------|--------------------|---------------|-------------------------|
| (O00115) Deoxyribonuclease-2-alpha precursor (EC 3.1.22.1) (Deoxyribonuclease II alpha) (DNase II alpha) (Acid DNase) (Lysosomal DNase II) (R31240_2)                                                                                               | DNS2A_HUMAN               | 39563                         | SNTSQLAFLLYNDQPPQPSK                     | R                   | A               | 95%                                     | 57.3                  | 38.4                       | 8.35                          | 1                                | 0                                | 2249.1                            | 85                  | 104                | 86            |                         |
| (O00115) Deoxyribonuclease-2-alpha precursor (EC 3.1.22.1) (Deoxyribonuclease II alpha) (DNase II alpha) (Acid DNase) (Lysosomal DNase II) (R31240_2)                                                                                               | DNS2A_HUMAN               | 39563                         | GHHVSOEPWNSSITLTSQAGAVFQSFQAK            | K                   | F               | 95%                                     | 0.0                   | 0.0                        | 6.43                          | 0                                | 1                                | 3015.5                            | 203                 | 230                | 212           |                         |
| (O00115) Deoxyribonuclease-2-alpha precursor (EC 3.1.22.1) (Deoxyribonuclease II alpha) (DNase II alpha) (Acid DNase) (Lysosomal DNase II) (R31240_2)                                                                                               | DNS2A_HUMAN               | 39563                         | TVGILPNSNCSDIWQVLNVNQIAFFPGAGPSFNSTEDHSK | K                   | W               | 95%                                     | 178.0                 | 37.7                       | 7.05                          | 0                                | 6                                | 4200.0                            | 259                 | 297                | 266           |                         |
| (O00462) Beta-mannosidase precursor (EC 3.2.1.25) (Lysosomal beta A mannosidase) (Mannanase) (Mannase)                                                                                                                                              | MANBA_HUMAN               | 100879                        | WWSLDNWYYSK                              | R                   | E               | 95%                                     | 54.4                  | 38.9                       | 2.07                          | 1                                | 0                                | 1399.7                            | 72                  | 82                 |               | 77                      |
| (O00468) Agrin precursor                                                                                                                                                                                                                            | AGRN_HUMAN                | 214863                        | NELMLNSSLMR                              | K                   | I               | 95%                                     | 72.4                  | 38.9                       | 3.34                          | 2                                | 0                                | 1340.6                            | 130                 | 140                |               | 135                     |
| (O00468) Agrin precursor                                                                                                                                                                                                                            | AGRN_HUMAN                | 214863                        | DPCSNVTCSEFGSTCAR                        | R                   | S               | 95%                                     | 64.0                  | 39.0                       | 6.82                          | 1                                | 0                                | 1819.7                            | 246                 | 261                |               | 250                     |
| (O00468) Agrin precursor                                                                                                                                                                                                                            | AGRN_HUMAN                | 214863                        | GPTFAPLPVPVAPLHCAQTPYGCQDNITAAR          | R                   | G               | 95%                                     | 68.9                  | 38.1                       | 4.24                          | 0                                | 2                                | 3381.6                            | 752                 | 782                |               | 777                     |
| (O00584) Ribonuclease T2 precursor (Ribonuclease 6)                                                                                                                                                                                                 | RNT2_HUMAN                | 29481                         | QDQQLQNCTEPGEQPSPK                       | K                   | Q               | 95%                                     | 106.6                 | 39.0                       | 8.96                          | 4                                | 0                                | 2084.6                            | 206                 | 223                |               | 212                     |
| (O00754) Lysosomal alpha-mannosidase precursor (EC 3.2.1.24) (Mannosidase, alpha B) (Lysosomal acid alpha-mannosidase) (Laman) (Mannosidase alpha class 2B member 1) (Contains: Lysosomal alpha-mannosidase A peptide; Lysosomal alpha-mannosidase) | MA2B1_HUMAN               | 113656                        | WWHQQTNATQEVVR                           | R                   | D               | 95%                                     | 41.7                  | 38.9                       | 5.37                          | 0                                | 1                                | 1783.9                            | 126                 | 139                |               | 133                     |
| (O00754) Lysosomal alpha-mannosidase precursor (EC 3.2.1.24) (Mannosidase, alpha B) (Lysosomal acid alpha-mannosidase) (Laman) (Mannosidase alpha class 2B member 1) (Contains: Lysosomal alpha-mannosidase A peptide; Lysosomal alpha-mannosidase) | MA2B1_HUMAN               | 113656                        | ANLTSWSVK                                | K                   | H               | 95%                                     | 48.3                  | 38.9                       | 2.85                          | 1                                | 0                                | 919.5                             | 365                 | 372                |               | 367                     |
| (O00754) Lysosomal alpha-mannosidase precursor (EC 3.2.1.24) (Mannosidase, alpha B) (Lysosomal acid alpha-mannosidase) (Laman) (Mannosidase alpha class 2B member 1) (Contains: Lysosomal alpha-mannosidase A peptide; Lysosomal alpha-mannosidase) | MA2B1_HUMAN               | 113656                        | TPLVQEVHQNFSAWCQVVR                      | K                   | L               | 95%                                     | 85.0                  | 38.6                       | 9.60                          | 1                                | 1                                | 2386.2                            | 682                 | 701                |               | 692                     |
| (O00754) Lysosomal alpha-mannosidase precursor (EC 3.2.1.24) (Mannosidase, alpha B) (Lysosomal acid alpha-mannosidase) (Laman) (Mannosidase alpha class 2B member 1) (Contains: Lysosomal alpha-mannosidase A peptide; Lysosomal alpha-mannosidase) | MA2B1_HUMAN               | 113656                        | LNQTEPVAGNYYPVNR                         | K                   | I               | 95%                                     | 111.0                 | 38.4                       | 6.43                          | 2                                | 0                                | 1936.9                            | 764                 | 780                |               | 766                     |
| (O14672) ADAM 10 precursor (EC 3.4.24.81) (A disintegrin and metalloproteinase domain 10) (Mammalian disintegrin-metalloprotease) (Kuzbanian protein homolog) (CDw156c antigen)                                                                     | ADA10_HUMAN               | 84125                         | INTTADEKDPNTNPF                          | R                   | F               | 95%                                     | 80.6                  | 38.6                       | 2.52                          | 2                                | 1                                | 1719.8                            | 277                 | 291                | 278           |                         |
| (O14672) ADAM 10 precursor (EC 3.4.24.81) (A disintegrin and metalloproteinase domain 10) (Mammalian disintegrin-metalloprotease) (Kuzbanian protein homolog) (CDw156c antigen)                                                                     | ADA10_HUMAN               | 84125                         | EGICNGFTALCPASDPKPNFTDCNR                | R                   | H               | 95%                                     | 56.2                  | 38.8                       | 5.37                          | 0                                | 1                                | 2844.2                            | 533                 | 557                |               | 551                     |

List of Glycopeptide Identified

|                                                                                                                                                                                                                                                      |             |        |                                         |   |   |     |       |      |       |   |   |        |      |      |          |
|------------------------------------------------------------------------------------------------------------------------------------------------------------------------------------------------------------------------------------------------------|-------------|--------|-----------------------------------------|---|---|-----|-------|------|-------|---|---|--------|------|------|----------|
| (O14773) Tripeptidyl-peptidase 1 precursor (EC 3.4.14.9) (Tripeptidyl-peptidase I) (TPP-I) (Tripeptidyl aminopeptidase) (Lysosomal pepstatin insensitive protease) (LPIC) (Growth-inhibiting gene 1 protein)                                         | TPP1_HUMAN  | 61230  | YNLTSQDV/GSGTSSNNSQACAQFLEQYFHSDLAQFMR  | R | L | 95% | 155.0 | 37.5 | 5.82  | 0 | 4 | 4248.8 | 209  | 245  | 210, 222 |
| (O14773) Tripeptidyl-peptidase 1 precursor (EC 3.4.14.9) (Tripeptidyl-peptidase I) (TPP-I) (Tripeptidyl aminopeptidase) (Lysosomal pepstatin insensitive protease) (LPIC) (Growth-inhibiting gene 1 protein)                                         | TPP1_HUMAN  | 61230  | FLSSSPHLPPSSYFNASGR                     | K | A | 95% | 75.4  | 39.1 | 4.51  | 1 | 1 | 2052.0 | 429  | 447  | 443      |
| (O14786) Neuropilin-1 precursor (Vascular endothelial cell growth factor 165 receptor) (CD304 antigen)                                                                                                                                               | NRP1_HUMAN  | 103105 | RGPECSQNYTTTPSGVIK                      | K | S | 95% | 67.2  | 38.4 | 3.42  | 2 | 0 | 1894.9 | 143  | 159  | 150      |
| (O14786) Neuropilin-1 precursor (Vascular endothelial cell growth factor 165 receptor) (CD304 antigen)                                                                                                                                               | NRP1_HUMAN  | 103105 | EGFSANYSVLQSSVSEDFK                     | K | C | 95% | 75.6  | 38.2 | 6.16  | 2 | 0 | 2095.0 | 256  | 274  | 260      |
| (O15031) Plexin-B2 precursor (MM1)                                                                                                                                                                                                                   | PLXB2_HUMAN | 205081 | ALSNISLR                                | R | L | 95% | 63.7  | 39.2 | 1.68  | 2 | 0 | 874.5  | 124  | 131  | 127      |
| (O15031) Plexin-B2 precursor (MM1)                                                                                                                                                                                                                   | PLXB2_HUMAN | 205081 | SCVAVTSQAQPNMSR                         | K | R | 95% | 81.9  | 38.6 | 6.38  | 1 | 0 | 1652.7 | 517  | 531  | 528      |
| (O15118) Niemann-Pick C1 protein precursor                                                                                                                                                                                                           | NPC1_HUMAN  | 142152 | VNDINTDQFCNASVVDPAQVR                   | R | C | 95% | 75.9  | 38.2 | 5.43  | 1 | 0 | 2282.0 | 959  | 978  | 968      |
| (O15230) Laminin alpha-5 chain precursor                                                                                                                                                                                                             | LAMA5_HUMAN | 399681 | RLNTTGVSAAGCTADLLVGR                    | K | A | 95% | 86.4  | 39.0 | 10.40 | 1 | 0 | 1962.0 | 3105 | 3123 | 3107     |
| (O43854) EGF-like repeat and discoidin I-like domain-containing protein 3 precursor (EGF-like repeats and discoidin I-like domains protein 3) (Developmentally-regulated endothelial cell locus 1 protein) (Integrin-binding protein DEL1)           | EDIL3_HUMAN | 53747  | NGGICTDLVANYSCECPGEFMR                  | K | N | 95% | 94.6  | 37.7 | 10.90 | 2 | 0 | 2625.0 | 130  | 152  | 140      |
| (O75503) Ceroid-lipofuscinosis neuronal protein 5 (Protein CLN5)                                                                                                                                                                                     | CLN5_HUMAN  | 46323  | IFLYSGEPTYLGNETSIVFGPTGNK               | R | T | 95% | 107.0 | 37.7 | 7.85  | 2 | 0 | 2593.2 | 259  | 282  | 271      |
| (O75629) CREG1 protein precursor (Cellular repressor of E1A-stimulated genes 1)                                                                                                                                                                      | CREG1_HUMAN | 24057  | LNITNIWVLDYFGGPK                        | K | I | 95% | 93.3  | 38.5 | 7.74  | 2 | 0 | 1851.0 | 192  | 207  | 193      |
| (O75882) Attractin precursor (Mahogany homolog) (DPPT-L)                                                                                                                                                                                             | ATRN_HUMAN  | 158518 | IDSTGNVTNELR                            | K | V | 95% | 93.2  | 38.7 | 2.82  | 2 | 0 | 1319.6 | 411  | 422  | 416      |
| (O75976) Carboxypeptidase D precursor (EC 3.4.17.22) (Metalloproteinase D) (gp180)                                                                                                                                                                   | CBPD_HUMAN  | 152899 | LLNNTDVLPLSLNPDGFER                     | R | A | 95% | 58.5  | 38.1 | 3.00  | 1 | 0 | 2278.2 | 170  | 189  | 172      |
| (P00533) Epidermal growth factor receptor precursor (EC 2.7.10.1) (Receptor tyrosine-protein kinase ErbB-1)                                                                                                                                          | EGFR_HUMAN  | 134261 | EFVNSECIQCHEPELQPMNITCTGR               | R | G | 95% | 66.8  | 38.3 | 4.89  | 0 | 2 | 3298.4 | 548  | 574  | 568      |
| (P00533) Epidermal growth factor receptor precursor (EC 2.7.10.1) (Receptor tyrosine-protein kinase ErbB-1)                                                                                                                                          | EGFR_HUMAN  | 134261 | TCPAGVMGENTLWLK                         | K | Y | 95% | 40.8  | 39.0 | 2.70  | 1 | 0 | 1794.8 | 594  | 609  | 603      |
| (P00749) Urokinase-type plasminogen activator precursor (EC 3.4.21.73) (uPA) (U-plasminogen activator) (Contains: Urokinase-type plasminogen activator long chain A; Urokinase-type plasminogen activator short chain A; Urokinase-type plasminogen) | UROK_HUMAN  | 48508  | TIQTICLPSMYNDPQFGTSCITGFGKFNSTDYLYPEQLK | R | M | 95% | 64.2  | 36.9 | 7.10  | 0 | 2 | 4664.1 | 294  | 333  | 322      |
| (P00749) Urokinase-type plasminogen activator precursor (EC 3.4.21.73) (uPA) (U-plasminogen activator) (Contains: Urokinase-type plasminogen activator long chain A; Urokinase-type plasminogen activator short chain A; Urokinase-type plasminogen) | UROK_HUMAN  | 48508  | ENSTDVLYPEQLK                           | K | M | 95% | 39.2  | 38.6 | 1.44  | 1 | 0 | 1600.7 | 321  | 333  | 322      |
| (P01009) Alpha-1-antitrypsin precursor (Alpha-1 protease inhibitor) (Alpha-1-antiproteinase)                                                                                                                                                         | A1AT_HUMAN  | 46720  | YLGNTAIFLFLPDEGK                        | K | L | 95% | 68.5  | 38.4 | 2.14  | 1 | 0 | 1756.9 | 268  | 283  | 271      |
| (P01011) Alpha-1-antichymotrypsin precursor (ACT) (Contains: Alpha-1-antichymotrypsin His-Pro-less)                                                                                                                                                  | AACT_HUMAN  | 47635  | FNLTETSEAIHQSFQHLRL                     | K | T | 95% | 32.5  | 38.6 | 4.23  | 1 | 2 | 2401.2 | 105  | 124  | 106      |
| (P01033) Metalloproteinase inhibitor 1 precursor (TIMP-1) (Erythroid potentiating activity) (EPA) (Tissue inhibitor of metalloproteinases) (Fibroblast collagenase inhibitor) (Collagenase inhibitor)                                                | TIMP1_HUMAN | 23153  | FVGTPEVNQTTLYQR                         | K | Y | 95% | 96.0  | 38.5 | 9.66  | 2 | 0 | 1753.9 | 46   | 60   | 53       |
| (P01033) Metalloproteinase inhibitor 1 precursor (TIMP-1) (Erythroid potentiating activity) (EPA) (Tissue inhibitor of metalloproteinases) (Fibroblast collagenase inhibitor) (Collagenase inhibitor)                                                | TIMP1_HUMAN | 23153  | SHNRSEEFLLAGK                           | R | L | 95% | 53.5  | 39.0 | 1.92  | 1 | 0 | 1488.7 | 99   | 111  | 101      |
| (P01137) Transforming growth factor beta-1 precursor (TGF-beta-1) (Contains: Latency-associated peptide (LAP))                                                                                                                                       | TGFB1_HUMAN | 44324  | LASPPSQGEVPPGPLPEAVLALYNSTR             | R | D | 95% | 78.3  | 37.9 | 9.96  | 1 | 0 | 2761.4 | 59   | 85   | 82       |
| (P02751) Fibronectin precursor (FN) (Cold-insoluble globulin) (CIG)                                                                                                                                                                                  | FINC_HUMAN  | 262581 | DQCIVDDITFVNVNDFTHK                     | R | R | 95% | 123.0 | 38.2 | 7.72  | 1 | 1 | 2198.0 | 516  | 533  | 528      |
| (P02751) Fibronectin precursor (FN) (Cold-insoluble globulin) (CIG)                                                                                                                                                                                  | FINC_HUMAN  | 262581 | HEEGHMLNCTCFGQGR                        | R | G | 95% | 68.7  | 39.3 | 3.11  | 0 | 2 | 1949.8 | 535  | 550  | 542      |
| (P02751) Fibronectin precursor (FN) (Cold-insoluble globulin) (CIG)                                                                                                                                                                                  | FINC_HUMAN  | 262581 | LDAPTNLQFVNEDTSTVLVR                    | K | W | 95% | 118.0 | 38.8 | 7.74  | 4 | 0 | 2233.1 | 997  | 1016 | 1007     |
| (P02790) Hemopexin precursor (Beta-1B-glycoprotein)                                                                                                                                                                                                  | HEMO_HUMAN  | 51659  | SWPAGVNCSSALR                           | R | W | 95% | 64.2  | 38.9 | 4.00  | 1 | 0 | 1405.7 | 181  | 193  | 187      |
| (P04062) Glucosylceramidase precursor (EC 3.2.1.45) (Beta-glucocerebrosidase) (Acid beta-glucosidase) (D-glucosyl-N-acylsphingosine glucosylase) (Alglucerase) (Imiglucerase)                                                                        | GLCM_HUMAN  | 59700  | MELSMGPIQANHTGTGLLLTLOPEQK              | R | F | 95% | 66.2  | 37.4 | 3.19  | 3 | 0 | 2824.4 | 88   | 113  | 98       |
| (P04062) Glucosylceramidase precursor (EC 3.2.1.45) (Beta-glucocerebrosidase) (Acid beta-glucosidase) (D-glucosyl-N-acylsphingosine glucosylase) (Alglucerase) (Imiglucerase)                                                                        | GLCM_HUMAN  | 59700  | TYTYADTPDDFGLHNFSLPEEDTK                | R | L | 95% | 89.3  | 37.9 | 3.62  | 1 | 1 | 2848.2 | 171  | 194  | 185      |
| (P04062) Glucosylceramidase precursor (EC 3.2.1.45) (Beta-glucocerebrosidase) (Acid beta-glucosidase) (D-glucosyl-N-acylsphingosine glucosylase) (Alglucerase) (Imiglucerase)                                                                        | GLCM_HUMAN  | 59700  | DLGPTLANSTHNNVR                         | R | L | 95% | 79.0  | 38.7 | 5.00  | 5 | 0 | 1632.8 | 302  | 316  | 309      |

List of Glycopeptide Identified

|                                                                                                                                                                                                                                                      |             |        |                           |   |   |     |       |      |       |   |   |        |      |      |     |      |  |
|------------------------------------------------------------------------------------------------------------------------------------------------------------------------------------------------------------------------------------------------------|-------------|--------|---------------------------|---|---|-----|-------|------|-------|---|---|--------|------|------|-----|------|--|
| (P04222) HLA class I histocompatibility antigen, Cw*3 alpha chain precursor (MHC class I antigen Cw*3)                                                                                                                                               | 1C03_HUMAN  | 40844  | GYYNQSEAGSHIIQR           |   |   |     |       |      |       |   |   |        |      |      |     |      |  |
| (P05026) Sodium/potassium-transporting ATPase subunit beta-1 (Sodium/potassium-dependent ATPase beta-1 subunit)                                                                                                                                      | AT1B1_HUMAN | 35045  | YLOPLLAVQFTNLTMDTEIR      | R | M | 95% | 65.8  | 39.0 | 6.55  | 1 | 0 | 1723.8 | 107  | 121  | 110 |      |  |
| (P05106) Integrin beta-3 precursor (Platelet membrane glycoprotein IIIa) (GPIIIa) (CD61 antigen)                                                                                                                                                     | ITB3_HUMAN  | 87196  | LRPDDSKNFSIQVR            | K | I | 95% | 86.4  | 37.9 | 6.74  | 2 | 0 | 2383.2 | 254  | 273  | 265 |      |  |
| (P05106) Integrin beta-3 precursor (Platelet membrane glycoprotein IIIa) (GPIIIa) (CD61 antigen)                                                                                                                                                     | ITB3_HUMAN  | 87196  | DLPEELSLSFNATCLNNEVIPGLK  | R | Q | 95% | 46.9  | 39.0 | 3.74  | 2 | 0 | 1675.9 | 118  | 131  | 125 |      |  |
| (P05362) Intercellular adhesion molecule 1 precursor (ICAM-1) (Major group rhinovirus receptor) (CD54 antigen)                                                                                                                                       | ICAM1_HUMAN | 57807  | ANLTVVLLR                 | R | S | 95% | 117.0 | 38.1 | 14.00 | 2 | 0 | 2674.3 | 387  | 410  |     | 397  |  |
| (P05362) Intercellular adhesion molecule 1 precursor (ICAM-1) (Major group rhinovirus receptor) (CD54 antigen)                                                                                                                                       | ICAM1_HUMAN | 57807  | LNPTVTYGNDSFSAK           | R | G | 95% | 73.0  | 38.8 | 0.75  | 2 | 0 | 999.6  | 144  | 152  | 145 |      |  |
| (P05556) Integrin beta-1 precursor (Fibronectin receptor beta subunit) (Integrin VLA-4 beta subunit) (CD29 antigen)                                                                                                                                  | ITB1_HUMAN  | 88447  | CHEGNGTFCGACR             | R | A | 95% | 79.2  | 38.8 | 4.70  | 2 | 0 | 1614.8 | 259  | 273  | 267 |      |  |
| (P05556) Integrin beta-1 precursor (Fibronectin receptor beta subunit) (Integrin VLA-4 beta subunit) (CD29 antigen)                                                                                                                                  | ITB1_HUMAN  | 88447  | KENSSEICSNNGECVCGQCVCVR   | K | C | 95% | 0.0   | 0.0  | 16.00 | 5 | 0 | 1638.6 | 477  | 490  |     | 481  |  |
| (P05556) Integrin beta-1 precursor (Fibronectin receptor beta subunit) (Integrin VLA-4 beta subunit) (CD29 antigen)                                                                                                                                  | ITB1_HUMAN  | 88447  | ENSSEICSNNGECVCGQCVCVR    | R | K | 95% | 101.0 | 37.6 | 8.92  | 3 | 2 | 2649.0 | 518  | 539  |     | 520  |  |
| (P05556) Integrin beta-1 precursor (Fibronectin receptor beta subunit) (Integrin VLA-4 beta subunit) (CD29 antigen)                                                                                                                                  | ITB1_HUMAN  | 88447  | ENSSEICSNNGECVCGQCVCVR    | K | K | 95% | 127.0 | 37.8 | 14.20 | 1 | 0 | 2520.9 | 519  | 539  |     | 520  |  |
| (P05556) Integrin beta-1 precursor (Fibronectin receptor beta subunit) (Integrin VLA-4 beta subunit) (CD29 antigen)                                                                                                                                  | ITB1_HUMAN  | 88447  | KDCTQEQCSYFNITK           | K | V | 95% | 92.4  | 38.6 | 3.96  | 1 | 1 | 1895.8 | 658  | 672  |     | 669  |  |
| (P05556) Integrin beta-1 precursor (Fibronectin receptor beta subunit) (Integrin VLA-4 beta subunit) (CD29 antigen)                                                                                                                                  | ITB1_HUMAN  | 88447  | DTCTQEQCSYFNITK           | K | V | 95% | 76.6  | 38.6 | 4.80  | 2 | 0 | 1767.7 | 659  | 672  |     | 669  |  |
| (P05556) Integrin beta-1 precursor (Fibronectin receptor beta subunit) (Integrin VLA-4 beta subunit) (CD29 antigen)                                                                                                                                  | ITB1_HUMAN  | 88447  | DTCTQEQCSYFNITKVESR       | K | D | 95% | 93.0  | 38.2 | 4.02  | 2 | 0 | 2239.0 | 659  | 676  |     | 669  |  |
| (P05997) Collagen alpha-2(V) chain precursor                                                                                                                                                                                                         | CO5A2_HUMAN | 144702 | EASQNITYICK               | K | N | 95% | 61.9  | 38.8 | 1.59  | 2 | 0 | 1327.6 | 1393 | 1403 |     | 1400 |  |
| (P06865) Beta-hexosaminidase alpha chain precursor (EC 3.2.1.52) (N-acetyl-beta-glucosaminidase) (Beta-N-acetylhexosaminidase) (Hexosaminidase A)                                                                                                    | HEXA_HUMAN  | 60672  | SAEGTFFINK                | K | T | 95% | 50.2  | 39.1 | 5.00  | 1 | 0 | 1114.5 | 149  | 158  | 157 |      |  |
| (P06865) Beta-hexosaminidase alpha chain precursor (EC 3.2.1.52) (N-acetyl-beta-glucosaminidase) (Beta-N-acetylhexosaminidase) (Hexosaminidase A)                                                                                                    | HEXA_HUMAN  | 60672  | SAEGTFFINKTEIEDFPR        | K | F | 95% | 97.4  | 38.1 | 7.51  | 1 | 2 | 2102.0 | 149  | 166  | 157 |      |  |
| (P07339) Cathepsin D precursor (EC 3.4.23.5) [Contains: Cathepsin D light chain; Cathepsin D heavy chain]                                                                                                                                            | CATD_HUMAN  | 44535  | YYKGLSLVNLNVR             | K | K | 95% | 75.7  | 38.5 | 7.28  | 2 | 0 | 1564.8 | 254  | 266  | 263 |      |  |
| (P07339) Cathepsin D precursor (EC 3.4.23.5) [Contains: Cathepsin D light chain; Cathepsin D heavy chain]                                                                                                                                            | CATD_HUMAN  | 44535  | GSLSLYNVTR                | K | K | 95% | 84.4  | 38.5 | 4.85  | 6 | 0 | 1110.6 | 257  | 266  | 263 |      |  |
| (P07602) Proactivator polypeptide precursor [Contains: Saposin A (Protein A); Saposin B-Val; Saposin B (Sphingolipid activator protein 1) (SAP-1) (Cerebroside sulfate activator) (CSAct) (Dispersin) (Sulfatide/GM1 activator); Saposin C (Co-beta- | SAP_HUMAN   | 58094  | DVVTAAGDMLKDNATEEIIIVLYEK | K | T | 95% | 99.7  | 37.5 | 5.21  | 5 | 2 | 2767.4 | 68   | 92   | 80  |      |  |
| (P07602) Proactivator polypeptide precursor [Contains: Saposin A (Protein A); Saposin B-Val; Saposin B (Sphingolipid activator protein 1) (SAP-1) (Cerebroside sulfate activator) (CSAct) (Dispersin) (Sulfatide/GM1 activator); Saposin C (Co-beta- | SAP_HUMAN   | 58094  | DNATEEIIIVLYEK            | K | T | 95% | 99.0  | 38.8 | 4.92  | 2 | 0 | 1666.8 | 79   | 92   | 80  |      |  |
| (P07602) Proactivator polypeptide precursor [Contains: Saposin A (Protein A); Saposin B-Val; Saposin B (Sphingolipid activator protein 1) (SAP-1) (Cerebroside sulfate activator) (CSAct) (Dispersin) (Sulfatide/GM1 activator); Saposin C (Co-beta- | SAP_HUMAN   | 58094  | TNSTFVQALVEHVK            | R | E | 95% | 80.9  | 39.2 | 6.14  | 2 | 0 | 1573.8 | 214  | 227  | 215 |      |  |
| (P07602) Proactivator polypeptide precursor [Contains: Saposin A (Protein A); Saposin B-Val; Saposin B (Sphingolipid activator protein 1) (SAP-1) (Cerebroside sulfate activator) (CSAct) (Dispersin) (Sulfatide/GM1 activator); Saposin C (Co-beta- | SAP_HUMAN   | 58094  | TNSTFVQALVEHVKEECDR       | R | L | 95% | 88.2  | 38.4 | 9.80  | 7 | 5 | 2263.1 | 214  | 232  | 215 |      |  |
| (P07602) Proactivator polypeptide precursor [Contains: Saposin A (Protein A); Saposin B-Val; Saposin B (Sphingolipid activator protein 1) (SAP-1) (Cerebroside sulfate activator) (CSAct) (Dispersin) (Sulfatide/GM1 activator); Saposin C (Co-beta- | SAP_HUMAN   | 58094  | LIDNNKTEKILDAFDK          | K | M | 95% | 75.6  | 38.3 | 8.66  | 4 | 3 | 2007.0 | 328  | 344  | 332 |      |  |
| (P07602) Proactivator polypeptide precursor [Contains: Saposin A (Protein A); Saposin B-Val; Saposin B (Sphingolipid activator protein 1) (SAP-1) (Cerebroside sulfate activator) (CSAct) (Dispersin) (Sulfatide/GM1 activator); Saposin C (Co-beta- | SAP_HUMAN   | 58094  | NLEKNSTKQEILAALEK         | R | G | 95% | 99.0  | 38.6 | 5.96  | 4 | 3 | 1930.0 | 422  | 438  | 426 |      |  |





List of Glycopeptide Identified

|                                                                                                                                                                                                                                                      |             |        |  |                                |   |   |     |       |      |      |    |   |        |      |      |          |
|------------------------------------------------------------------------------------------------------------------------------------------------------------------------------------------------------------------------------------------------------|-------------|--------|--|--------------------------------|---|---|-----|-------|------|------|----|---|--------|------|------|----------|
| (P11717) Cation-independent mannose-6-phosphate receptor precursor (CI Man-6-P receptor) (CI-MPR) (M6PR) (Insulin-like growth factor 2 receptor) (Insulin-like growth factor II receptor) (IGF-II receptor) (M6P/IGF2 receptor) (M6P/IGF2R) (300 kD) | MPRI_HUMAN  | 274256 |  | SLLEFNTTVSCDQQGNTNHR           | R | V | 95% | 64.9  | 38.6 | 3.96 | 1  | 0 | 2208.0 | 107  | 125  | 112      |
| (P11717) Cation-independent mannose-6-phosphate receptor precursor (CI Man-6-P receptor) (CI-MPR) (M6PR) (Insulin-like growth factor 2 receptor) (Insulin-like growth factor II receptor) (IGF-II receptor) (M6P/IGF2 receptor) (M6P/IGF2R) (300 kD) | MPRI_HUMAN  | 274256 |  | TNITLVCKPGDLESAPVLR            | K | T | 95% | 81.1  | 38.6 | 8.89 | 2  | 0 | 2084.1 | 580  | 598  | 581      |
| (P11717) Cation-independent mannose-6-phosphate receptor precursor (CI Man-6-P receptor) (CI-MPR) (M6PR) (Insulin-like growth factor 2 receptor) (Insulin-like growth factor II receptor) (IGF-II receptor) (M6P/IGF2 receptor) (M6P/IGF2R) (300 kD) | MPRI_HUMAN  | 274256 |  | DAGVGFPEYQEEEDNSTYNFR          | R | W | 95% | 91.7  | 38.8 | 9.21 | 2  | 0 | 2339.0 | 734  | 753  | 747      |
| (P11717) Cation-independent mannose-6-phosphate receptor precursor (CI Man-6-P receptor) (CI-MPR) (M6PR) (Insulin-like growth factor 2 receptor) (Insulin-like growth factor II receptor) (IGF-II receptor) (M6P/IGF2 receptor) (M6P/IGF2R) (300 kD) | MPRI_HUMAN  | 274256 |  | TGPVVEDSGSLLELVNGSACTTSDGR     | K | Q | 95% | 103.0 | 38.0 | 9.13 | 1  | 0 | 2785.3 | 855  | 881  | 871      |
| (P11717) Cation-independent mannose-6-phosphate receptor precursor (CI Man-6-P receptor) (CI-MPR) (M6PR) (Insulin-like growth factor 2 receptor) (Insulin-like growth factor II receptor) (IGF-II receptor) (M6P/IGF2 receptor) (M6P/IGF2R) (300 kD) | MPRI_HUMAN  | 274256 |  | DPNSGFVFNLNPLNSQGYVNSGIGK      | R | I | 95% | 33.8  | 38.0 | 3.11 | 1  | 0 | 2727.3 | 938  | 963  | 951, 957 |
| (P11717) Cation-independent mannose-6-phosphate receptor precursor (CI Man-6-P receptor) (CI-MPR) (M6PR) (Insulin-like growth factor 2 receptor) (Insulin-like growth factor II receptor) (IGF-II receptor) (M6P/IGF2 receptor) (M6P/IGF2R) (300 kD) | MPRI_HUMAN  | 274256 |  | MDGCTLTDEQLLYSFLNLSLSTSTFK     | R | V | 95% | 109.0 | 37.6 | 5.68 | 1  | 0 | 2975.4 | 1801 | 1826 | 1816     |
| (P12110) Collagen alpha-2(VI) chain precursor                                                                                                                                                                                                        | CO6A2_HUMAN | 108557 |  | GTFTDCALANMTEQIR               | R | Q | 95% | 75.3  | 38.7 | 6.39 | 1  | 0 | 1828.8 | 131  | 146  | 140      |
| (P13473) Lysosome-associated membrane glycoprotein 2 precursor (LAMP-2) (CD107b antigen)                                                                                                                                                             | LAMP2_HUMAN | 44943  |  | WQMNFVTR                       | K | Y | 95% | 35.1  | 39.0 | 4.92 | 2  | 0 | 1098.5 | 46   | 53   | 49       |
| (P13473) Lysosome-associated membrane glycoprotein 2 precursor (LAMP-2) (CD107b antigen)                                                                                                                                                             | LAMP2_HUMAN | 44943  |  | IIVQFGPGFSWIANFTK              | K | A | 95% | 77.7  | 38.6 | 8.80 | 1  | 0 | 1884.0 | 88   | 104  | 101      |
| (P13473) Lysosome-associated membrane glycoprotein 2 precursor (LAMP-2) (CD107b antigen)                                                                                                                                                             | LAMP2_HUMAN | 44943  |  | VASVININPNTTHSTGSCR            | K | S | 95% | 93.3  | 38.7 | 4.85 | 2  | 2 | 2029.0 | 248  | 266  | 257      |
| (P13473) Lysosome-associated membrane glycoprotein 2 precursor (LAMP-2) (CD107b antigen)                                                                                                                                                             | LAMP2_HUMAN | 44943  |  | WQPFVNTQGK                     | R | Y | 95% | 30.6  | 39.0 | 4.54 | 1  | 0 | 1118.6 | 352  | 361  | 356      |
| (P13591) Neural cell adhesion molecule 1, 140 kDa isoform precursor (N-CAM 140) (NCAM-140) (CD56 antigen)                                                                                                                                            | NCA11_HUMAN | 93343  |  | DGQLLPSSNYSNIK                 | R | I | 95% | 64.5  | 38.5 | 2.60 | 1  | 0 | 1536.8 | 451  | 464  | 459      |
| (P13611) Versican core protein precursor (Large fibroblast proteoglycan) (Chondroitin sulfate proteoglycan core protein 2) (PG-M) (Glial hyaluronate-binding protein) (GHAP)                                                                         | CSPG2_HUMAN | 372795 |  | FENQTFGPPPSDR                  | R | F | 95% | 69.7  | 39.4 | 6.34 | 6  | 0 | 1492.7 | 328  | 340  | 330      |
| (P13611) Versican core protein precursor (Large fibroblast proteoglycan) (Chondroitin sulfate proteoglycan core protein 2) (PG-M) (Glial hyaluronate-binding protein) (GHAP)                                                                         | CSPG2_HUMAN | 372795 |  | RGQFESVAPSQNFSDSSSESDTHPFVIK   | R | T | 95% | 79.4  | 38.8 | 7.80 | 0  | 2 | 3068.4 | 1431 | 1458 | 1442     |
| (P13987) CD59 glycoprotein precursor (Membrane attack complex inhibition factor) (MACIF) (MAC-inhibitory protein) (MAC-IP) (Protectin) (MEM43 antigen) (Membrane inhibitor of reactive lysis) (MIRL) (20 kDa homologous restriction factor) (HRF-20) | CD59_HUMAN  | 14159  |  | TAVNCSSDFDACLITK               | K | A | 95% | 117.0 | 39.2 | 8.02 | 73 | 0 | 1802.8 | 40   | 55   | 43       |
| (P14384) Carboxypeptidase M precursor (EC 3.4.17.12)                                                                                                                                                                                                 | CBPM_HUMAN  | 50497  |  | ELLLHLIDYLVTSDBGKDEPTEINLINSTR | R | I | 95% | 85.8  | 38.7 | 6.39 | 0  | 2 | 3184.7 | 91   | 118  | 115      |
| (P14384) Carboxypeptidase M precursor (EC 3.4.17.12)                                                                                                                                                                                                 | CBPM_HUMAN  | 50497  |  | INFPDAFEYNNVSR                 | R | Q | 95% | 66.8  | 38.8 | 4.11 | 2  | 0 | 1573.7 | 155  | 167  | 164      |
| (P15151) Poliovirus receptor precursor (Nectin-like protein 5) (Nect-5) (CD155 antigen)                                                                                                                                                              | PVR_HUMAN   | 45284  |  | VEDEGNYTCLFVTFPQGSR            | R | S | 95% | 95.6  | 38.8 | 5.34 | 2  | 0 | 2220.0 | 115  | 133  | 120      |
| (P15529) Membrane cofactor protein precursor (Trophoblast leukocyte common antigen) (TLX) (CD46 antigen)                                                                                                                                             | MCP_HUMAN   | 43730  |  | GFYLDGSDTIVCSNSTWDPPVPK        | K | C | 95% | 58.8  | 38.0 | 7.89 | 1  | 0 | 2671.2 | 259  | 282  | 273      |
| (P15586) N-acetylglucosamine-6-sulfatase precursor (EC 3.1.6.14) (G6S) (Glucosamine-6-sulfatase)                                                                                                                                                     | GNS_HUMAN   | 62066  |  | YPHNHVHVNNLTLEGNCSSK           | K | S | 95% | 76.7  | 38.5 | 6.85 | 3  | 0 | 2210.0 | 103  | 121  | 111, 117 |
| (P15586) N-acetylglucosamine-6-sulfatase precursor (EC 3.1.6.14) (G6S) (Glucosamine-6-sulfatase)                                                                                                                                                     | GNS_HUMAN   | 62066  |  | YYNYTSLSINGK                   | K | A | 95% | 74.8  | 38.6 | 6.04 | 2  | 0 | 1337.6 | 181  | 191  | 183      |
| (P15586) N-acetylglucosamine-6-sulfatase precursor (EC 3.1.6.14) (G6S) (Glucosamine-6-sulfatase)                                                                                                                                                     | GNS_HUMAN   | 62066  |  | KHGENV'SVDYLDVLANVSLDFLDYK     | R | S | 95% | 76.8  | 37.0 | 5.35 | 2  | 2 | 3020.4 | 194  | 219  | 198      |
| (P15586) N-acetylglucosamine-6-sulfatase precursor (EC 3.1.6.14) (G6S) (Glucosamine-6-sulfatase)                                                                                                                                                     | GNS_HUMAN   | 62066  |  | TPMTNSSIQFLDNAFR               | K | K | 95% | 139.0 | 39.1 | 6.27 | 13 | 4 | 1843.9 | 275  | 290  | 279      |

List of Glycopeptide Identified

|                                                                                                                                                                                                                                                      |             |        |                                    |   |   |     |       |      |       |   |   |        |      |      |        |     |
|------------------------------------------------------------------------------------------------------------------------------------------------------------------------------------------------------------------------------------------------------|-------------|--------|------------------------------------|---|---|-----|-------|------|-------|---|---|--------|------|------|--------|-----|
| (P15586) N-acetylglucosamine-6-sulfatase precursor (EC 3.1.6.14) (G6S) (Glucosamine-6-sulfatase)                                                                                                                                                     | GNS_HUMAN   | 62066  | LEFTGELNNTYIFYTSDNGYHTGQFSLPIDK    | R | R | 95% | 99.8  | 38.3 | 4.66  | 0 | 2 | 3587.6 | 310  | 340  | 317    |     |
| (P15586) N-acetylglucosamine-6-sulfatase precursor (EC 3.1.6.14) (G6S) (Glucosamine-6-sulfatase)                                                                                                                                                     | GNS_HUMAN   | 62066  | MLVANIDLPTLLDIAGYDLNK              | K | T | 95% | 104.0 | 38.1 | 13.90 | 1 | 0 | 2376.2 | 367  | 388  | 387    |     |
| (P15586) N-acetylglucosamine-6-sulfatase precursor (EC 3.1.6.14) (G6S) (Glucosamine-6-sulfatase)                                                                                                                                                     | GNS_HUMAN   | 62066  | GASNL TWR                          | R | S | 95% | 58.0  | 38.9 | 2.85  | 8 | 0 | 905.4  | 402  | 409  | 405    |     |
| (P15848) Arylsulfatase B precursor (EC 3.1.6.12) (ASB) (N-acetylgalactosamine-4-sulfatase) (G4S)                                                                                                                                                     | ARSB_HUMAN  | 59671  | CTLIDALNVTR                        | R | C | 95% | 0.0   | 0.0  | 4.85  | 1 | 0 | 1259.6 | 181  | 191  | 188    |     |
| (P15848) Arylsulfatase B precursor (EC 3.1.6.12) (ASB) (N-acetylgalactosamine-4-sulfatase) (G4S)                                                                                                                                                     | ARSB_HUMAN  | 59671  | GHTNGTKPLDGFVWK                    | R | T | 95% | 62.0  | 38.4 | 5.77  | 1 | 1 | 1772.9 | 363  | 378  | 366    |     |
| (P16070) CD44 antigen precursor (Phagocytic glycoprotein I) (PGP-1) (HUTCH-I) (Extracellular matrix receptor-III) (ECMR-III) (GP90 lymphocyte homing/adhesion receptor) (Hermes antigen) (Hyaluronate receptor) (Heparan sulfate proteoglycan) (Epi) | CD44_HUMAN  | 81535  | AFNSTLPTMAQMEK                     | K | A | 95% | 72.2  | 39.2 | 7.22  | 5 | 0 | 1601.7 | 55   | 68   | 57     |     |
| (P16278) Beta-galactosidase precursor (EC 3.2.1.23) (Lactase) (Acid beta-galactosidase)                                                                                                                                                              | BGAL_HUMAN  | 76076  | NNVITLNTIGK                        | R | A | 95% | 76.2  | 38.9 | 4.15  | 4 | 0 | 1188.6 | 458  | 468  | 464    |     |
| (P16870) Carboxypeptidase E precursor (EC 3.4.17.10) (CPE) (Carboxypeptidase H) (CPH) (Enkephalin convertase) (Prohormone-processing carboxypeptidase)                                                                                               | CBPE_HUMAN  | 53134  | GNETIVNLHSTR                       | K | I | 95% | 69.1  | 39.3 | 5.14  | 2 | 0 | 1454.8 | 138  | 150  | 139    |     |
| (P16870) Carboxypeptidase E precursor (EC 3.4.17.10) (CPE) (Carboxypeptidase H) (CPH) (Enkephalin convertase) (Prohormone-processing carboxypeptidase)                                                                                               | CBPE_HUMAN  | 53134  | DLOGNPIANATISVEGIDHDVTSAK          | R | D | 95% | 54.2  | 38.3 | 4.19  | 1 | 0 | 2567.2 | 382  | 406  | 390    |     |
| (P17050) Alpha-N-acetylgalactosaminidase precursor (EC 3.2.1.49) (Alpha-galactosidase B)                                                                                                                                                             | NAGAB_HUMAN | 46548  | LGIYADMGNFCTCMGYPTTLDK             | K | V | 95% | 102.0 | 38.5 | 13.80 | 3 | 1 | 2442.1 | 116  | 137  | 124    |     |
| (P17050) Alpha-N-acetylgalactosaminidase precursor (EC 3.2.1.49) (Alpha-galactosidase B)                                                                                                                                                             | NAGAB_HUMAN | 46548  | VNYSLLADICNLWR                     | R | N | 95% | 77.5  | 38.4 | 6.49  | 2 | 0 | 1737.9 | 200  | 213  | 201    |     |
| (P17301) Integrin alpha-2 precursor (Platelet membrane glycoprotein Ia) (GPIa) (Collagen receptor) (VLA-2 alpha chain) (CD49b antigen)                                                                                                               | ITA2_HUMAN  | 129280 | YFFNVSDAEALLES                     | R | A | 95% | 89.4  | 39.2 | 10.40 | 2 | 0 | 1646.8 | 340  | 353  | 343    |     |
| (P17301) Integrin alpha-2 precursor (Platelet membrane glycoprotein Ia) (GPIa) (Collagen receptor) (VLA-2 alpha chain) (CD49b antigen)                                                                                                               | ITA2_HUMAN  | 129280 | GEYFVNVTTTR                        | K | I | 95% | 52.2  | 38.8 | 2.02  | 1 | 0 | 1186.6 | 1069 | 1078 | 1074   |     |
| (P17900) Ganglioside GM2 activator precursor (GM2-AP) (Cerebroside sulfate activator protein) (Shingolipid activator protein 3) (SAP-3) [Contains: Ganglioside GM2 activator isoform short]                                                          | SAP3_HUMAN  | 20805  | SLTLEPDPVIVPGNVTLSSVVGSTSVPLSSPLK  | R | V | 95% | 88.7  | 36.9 | 9.31  | 2 | 0 | 3203.8 | 50   | 81   | 63     |     |
| (P17936) Insulin-like growth factor-binding protein 3 precursor (IGFBP-3) (IBP-3) (IGF-binding protein 3)                                                                                                                                            | IBP3_HUMAN  | 31642  | GLCVNASAVSR                        | R | L | 95% | 82.8  | 39.4 | 3.60  | 1 | 0 | 1134.6 | 112  | 122  | 116    |     |
| (P18084) Integrin beta-5 precursor                                                                                                                                                                                                                   | ITB5_HUMAN  | 88037  | DCVECLLLHSGKPDNQTCCHSLCR           | R | D | 95% | 63.6  | 38.5 | 4.48  | 0 | 1 | 2800.2 | 640  | 662  | 654    |     |
| (P19022) Neural-cadherin precursor (N-cadherin) (Cadherin-2) (CDw325 antigen)                                                                                                                                                                        | CADH2_HUMAN | 99836  | IIVSQAPSTPSPNMFITINNETGDIITVAAGLDR | R | E | 95% | 82.8  | 37.1 | 5.96  | 1 | 0 | 3346.6 | 308  | 339  | 325    |     |
| (P19440) Gamma-glutamyltranspeptidase 1 precursor (EC 2.3.2.2) (Gamma-glutamyltransferase 1) (CD224 antigen) [Contains: Gamma-glutamyltranspeptidase 1 heavy chain; Gamma-glutamyltranspeptidase 1 light chain]                                      | GGT1_HUMAN  | 24256  | LHNQLLPNVTTVER                     | R | N | 95% | 58.4  | 39.2 | 2.72  | 1 | 0 | 1634.9 | 504  | 530  | 511    |     |
| (P20645) Cation-dependent mannose-6-phosphate receptor precursor (CD Man-6-P receptor) (CD-MPR) (46 kDa mannose 6-phosphate receptor) (MPR 46)                                                                                                       | MPRD_HUMAN  | 30975  | EAGNHTSGAGLVQINK                   | R | S | 95% | 55.7  | 38.5 | 3.02  | 1 | 0 | 1596.8 | 80   | 95   | 83, 94 |     |
| (P21589) 5'-nucleotidase precursor (EC 3.1.3.5) (Ecto-5'-nucleotidase) (5'-NT) (CD73 antigen)                                                                                                                                                        | 5NTD_HUMAN  | 63351  | GNVISSHGPNILLNSSIPEDPSIK           | R | A | 95% | 105.0 | 37.8 | 6.72  | 1 | 0 | 2489.3 | 298  | 321  | 311    |     |
| (P21589) 5'-nucleotidase precursor (EC 3.1.3.5) (Ecto-5'-nucleotidase) (5'-NT) (CD73 antigen)                                                                                                                                                        | 5NTD_HUMAN  | 63351  | IKLDNYSTQELGK                      | R | T | 95% | 71.4  | 38.7 | 4.15  | 2 | 1 | 1509.8 | 329  | 341  | 333    |     |
| (P21589) 5'-nucleotidase precursor (EC 3.1.3.5) (Ecto-5'-nucleotidase) (5'-NT) (CD73 antigen)                                                                                                                                                        | 5NTD_HUMAN  | 63351  | LDNYSTQELGK                        | K | T | 95% | 72.3  | 38.6 | 5.15  | 1 | 0 | 1268.6 | 331  | 341  | 333    |     |
| (P22304) Iduronate 2-sulfatase precursor (EC 3.1.6.13) (Alpha-L-iduronate sulfate sulfatase) (Idursulfase) [Contains: Iduronate 2-sulfatase 42 kDa chain; Iduronate 2-sulfatase 14 kDa chain]                                                        | IDS_HUMAN   | 61857  | VHAGNFSTPIQYFK                     | R | E | 95% | 63.9  | 38.8 | 5.31  | 1 | 0 | 1609.8 | 111  | 124  | 115    |     |
| (P22304) Iduronate 2-sulfatase precursor (EC 3.1.6.13) (Alpha-L-iduronate sulfate sulfatase) (Idursulfase) [Contains: Iduronate 2-sulfatase 42 kDa chain; Iduronate 2-sulfatase 14 kDa chain]                                                        | IDS_HUMAN   | 61857  | QREDVQALNISVPYGPVDFOR              | R | K | 95% | 0.0   | 0.0  | 9.92  | 1 | 0 | 2625.3 | 272  | 294  | 280    |     |
| (P23470) Receptor-type tyrosine-protein phosphatase gamma precursor (EC 3.1.3.48) (Protein-tyrosine phosphatase gamma) (R-PTP-gamma)                                                                                                                 | PTPRG_HUMAN | 162042 | YGEEYQELQLDGFDNESNKK               | R | T | 95% | 34.8  | 38.5 | 5.77  | 2 | 0 | 2302.0 | 95   | 114  | 113    | 109 |
| (P23470) Receptor-type tyrosine-protein phosphatase gamma precursor (EC 3.1.3.48) (Protein-tyrosine phosphatase gamma) (R-PTP-gamma)                                                                                                                 | PTPRG_HUMAN | 162042 | SDFSQTMFLFQANTTR                   | R | I | 95% | 97.6  | 38.9 | 4.37  | 2 | 0 | 1763.8 | 433  | 447  | 444    |     |
| (P24821) Tenascin precursor (TN) (Hexabrachion) (Cytotactin) (Neuronectin) (GMEM) (JI) (Miotendinous antigen) (Glioma-associated-extracellular matrix antigen) (GP 150-225) (Tenascin-C) (TN-C)                                                      | TENA_HUMAN  | 240845 | QSGVNATLPEENQPVVFNHVYNIK           | R | L | 95% | 0.0   | 0.0  | 3.85  | 1 | 0 | 2681.3 | 34   | 57   | 38     |     |





List of Glycopeptide Identified

|                                                                                                                                                                                                                                                      |             |        |  |                                             |   |   |     |       |      |       |   |   |        |      |      |      |
|------------------------------------------------------------------------------------------------------------------------------------------------------------------------------------------------------------------------------------------------------|-------------|--------|--|---------------------------------------------|---|---|-----|-------|------|-------|---|---|--------|------|------|------|
| (P27487) Dipeptidyl peptidase 4 (EC 3.4.14.5) (Dipeptidyl peptidase IV) (DPP IV) (T-cell activation antigen CD26) (TP103) (Adenosine deaminase complexing protein 2) (ADABP) [Contains: Dipeptidyl peptidase 4 membrane form (Dipeptidyl peptidase)] | DPP4_HUMAN  | 88263  |  | LDFFILNETK                                  | K | F | 95% | 66.0  | 39.3 | 2.72  | 2 | 0 | 1206.7 | 514  | 523  | 520  |
| (P28799) Granulins precursor (Proepithelin) (PEPI) [Contains: Acrogranin; Paragranulin; Granulin-1 (Granulin G); Granulin-2 (Granulin F); Granulin-3 (Granulin B); Granulin-4 (Granulin A); Granulin-5 (Granulin C); Granulin-6 (Granulin D); Granul | GRN_HUMAN   | 63522  |  | YGCCPMPNATCCSDHLHCCPQDVTCDLQSK              | K | C | 95% | 77.9  | 38.0 | 4.85  | 0 | 2 | 3801.5 | 229  | 259  | 236  |
| (P28799) Granulins precursor (Proepithelin) (PEPI) [Contains: Acrogranin; Paragranulin; Granulin-1 (Granulin G); Granulin-2 (Granulin F); Granulin-3 (Granulin B); Granulin-4 (Granulin A); Granulin-5 (Granulin C); Granulin-6 (Granulin D); Granul | GRN_HUMAN   | 63522  |  | CLSKENATTDLLTK                              | K | L | 95% | 0.0   | 0.0  | 8.31  | 2 | 0 | 1577.8 | 260  | 273  | 265  |
| (P28799) Granulins precursor (Proepithelin) (PEPI) [Contains: Acrogranin; Paragranulin; Granulin-1 (Granulin G); Granulin-2 (Granulin F); Granulin-3 (Granulin B); Granulin-4 (Granulin A); Granulin-5 (Granulin C); Granulin-6 (Granulin D); Granul | GRN_HUMAN   | 63522  |  | DVECGEGHFCHDNTQCCR                          | K | D | 95% | 76.5  | 38.0 | 4.54  | 2 | 0 | 2281.8 | 518  | 535  | 530  |
| (P28827) Receptor-type tyrosine-protein phosphatase mu precursor (EC 3.1.3.48) (Protein-tyrosine phosphatase mu) (R-PTP-mu)                                                                                                                          | PTPRM_HUMAN | 163616 |  | VNNGPLGNPIWNISGDPTR                         | K | T | 95% | 94.4  | 38.7 | 3.85  | 2 | 0 | 2023.0 | 120  | 138  | 131  |
| (P28827) Receptor-type tyrosine-protein phosphatase mu precursor (EC 3.1.3.48) (Protein-tyrosine phosphatase mu) (R-PTP-mu)                                                                                                                          | PTPRM_HUMAN | 163616 |  | WEFFGYNVTR                                  | R | C | 95% | 30.9  | 38.9 | 3.39  | 1 | 0 | 1269.6 | 400  | 409  | 406  |
| (P29323) Ephrin type-B receptor 2 precursor (EC 2.7.10.1) (Tyrosine-protein kinase receptor EPH-3) (DRT) (Receptor protein-tyrosine kinase HEK5) (ERK) (NY-REN-47 antigen)                                                                           | EPHB2_HUMAN | 117476 |  | AGFEAVENGTVCR                               | K | G | 95% | 55.4  | 39.2 | 6.89  | 1 | 0 | 1410.6 | 258  | 270  | 265  |
| (P30481) HLA class I histocompatibility antigen, B-44 alpha chain precursor (MHC class I antigen B*44) (Bw-44)                                                                                                                                       | 1B44_HUMAN  | 40477  |  | YYNQSEAGSHIQR                               | R | M | 95% | 46.9  | 38.9 | 5.16  | 1 | 0 | 1666.8 | 108  | 121  | 110  |
| (P30501) HLA class I histocompatibility antigen, Cw-2 alpha chain precursor (MHC class I antigen Cw*2)                                                                                                                                               | 1C02_HUMAN  | 40754  |  | GYYNQSEAGSHTLQR                             | R | M | 95% | 71.4  | 38.6 | 1.14  | 1 | 0 | 1711.8 | 107  | 121  | 110  |
| (P30530) Tyrosine-protein kinase receptor UFO precursor (EC 2.7.10.1) (AXL oncogene)                                                                                                                                                                 | UFO_HUMAN   | 97418  |  | TVAAANTPFNLSCQAQGPPEVDLLWLQDAVPLATAPGHG PQR | R | S | 95% | 74.0  | 37.3 | 10.40 | 0 | 1 | 4436.2 | 142  | 183  | 150  |
| (P34059) N-acetylgalactosamine-6-sulfatase precursor (EC 3.1.6.4) (N-acetylgalactosamine-6-sulfate sulfatase) (Galactose-6-sulfate sulfatase) (GalNAc6S sulfatase) (Chondroitinsulfatase) (Chondroitinase)                                           | GALNS_HUMAN | 58009  |  | TGEANLTQIQLAELDFIK                          | K | R | 95% | 111.0 | 38.7 | 8.52  | 2 | 0 | 2168.1 | 200  | 218  | 204  |
| (P34059) N-acetylgalactosamine-6-sulfatase precursor (EC 3.1.6.4) (N-acetylgalactosamine-6-sulfate sulfatase) (Galactose-6-sulfate sulfatase) (GalNAc6S sulfatase) (Chondroitinsulfatase) (Chondroitinase)                                           | GALNS_HUMAN | 58009  |  | QGIDFCGQNVSGVTHNLEDHTK                      | R | L | 95% | 0.0   | 0.0  | 5.11  | 1 | 0 | 2638.2 | 414  | 437  | 423  |
| (P35555) Fibrillin-1 precursor                                                                                                                                                                                                                       | FBN1_HUMAN  | 312283 |  | VLPVNTVDYQQLVR                              | R | Y | 95% | 62.1  | 38.6 | 6.34  | 2 | 0 | 1676.9 | 444  | 457  | 448  |
| (P35555) Fibrillin-1 precursor                                                                                                                                                                                                                       | FBN1_HUMAN  | 312283 |  | AWGTPCEMCPAVNTSEYK                          | K | I | 95% | 59.6  | 38.9 | 4.82  | 1 | 0 | 2117.9 | 1569 | 1586 | 1581 |
| (P35613) Basigin precursor (Leukocyte activation antigen M6) (Collagenase stimulatory factor) (Extracellular matrix metalloproteinase inducer) (EMMPRIN) (5F7) (Tumor cell-derived collagenase stimulatory factor) (TCSF) (OK blood group antigen)   | BASI_HUMAN  | 42182  |  | ILLTCSLNSDASEVTGHR                          | K | W | 95% | 133.0 | 38.2 | 5.27  | 4 | 2 | 1988.0 | 153  | 170  | 160  |
| (P35613) Basigin precursor (Leukocyte activation antigen M6) (Collagenase stimulatory factor) (Extracellular matrix metalloproteinase inducer) (EMMPRIN) (5F7) (Tumor cell-derived collagenase stimulatory factor) (TCSF) (OK blood group antigen)   | BASI_HUMAN  | 42182  |  | ITDSEDKALMNGSESR                            | K | F | 95% | 76.0  | 38.8 | 4.82  | 2 | 0 | 1769.8 | 258  | 273  | 268  |
| (P41271) Neuroblastoma suppressor of tumorigenicity 1 precursor (Zinc finger protein DAN) (N03)                                                                                                                                                      | NBL1_HUMAN  | 19258  |  | NITQIVGHSGCCAK                              | K | S | 95% | 88.6  | 38.7 | 7.00  | 1 | 0 | 1514.7 | 38   | 51   | 38   |
| (P42785) Lysosomal Pro-X carboxypeptidase precursor (EC 3.4.16.2) (Prolylcarboxypeptidase) (PRCP) (Proline carboxypeptidase) (Angiotensinase C) (Lysosomal carboxypeptidase C)                                                                       | PCP_HUMAN   | 55783  |  | NYSVLYFQOK                                  | K | V | 95% | 55.2  | 38.7 | 4.24  | 1 | 0 | 1290.6 | 47   | 56   | 47   |
| (P42785) Lysosomal Pro-X carboxypeptidase precursor (EC 3.4.16.2) (Prolylcarboxypeptidase) (PRCP) (Proline carboxypeptidase) (Angiotensinase C) (Lysosomal carboxypeptidase C)                                                                       | PCP_HUMAN   | 55783  |  | NISSHTNIVFNSGELDPWSSGGVTK                   | K | D | 95% | 64.3  | 37.9 | 9.14  | 2 | 0 | 2618.2 | 415  | 439  | 415  |
| (P42892) Endothelin-converting enzyme 1 (EC 3.4.24.71) (ECE-1)                                                                                                                                                                                       | ECE1_HUMAN  | 87147  |  | HLLENSTASVSEAR                              | K | K | 95% | 107.0 | 38.6 | 7.51  | 2 | 0 | 1643.8 | 162  | 176  | 166  |
| (P43121) Cell surface glycoprotein MUC18 precursor (Melanoma-associated antigen MUC18) (Melanoma cell adhesion molecule) (Melanoma-associated antigen A32) (S-endo 1 endothelial-associated antigen) (Cell surface glycoprotein P1H12) (CD146 anti   | MUC18_HUMAN | 71589  |  | CGLSQSQGNLSHVDWFSVHK                        | K | E | 95% | 0.0   | 0.0  | 9.01  | 1 | 0 | 2270.0 | 48   | 67   | 56   |
| (P43251) Biotinidase precursor (EC 3.5.1.12)                                                                                                                                                                                                         | BTD_HUMAN   | 58896  |  | DVQIIVFPEDGIHGFNFR                          | K | T | 95% | 0.0   | 0.0  | 4.54  | 0 | 1 | 2205.1 | 84   | 102  | 99   |
| (P43251) Biotinidase precursor (EC 3.5.1.12)                                                                                                                                                                                                         | BTD_HUMAN   | 58896  |  | FNDTEVLQR                                   | R | L | 95% | 61.3  | 38.5 | 1.52  | 1 | 0 | 1122.5 | 129  | 137  | 130  |

List of Glycopeptide Identified

|                                                                                                                                                                                                                                                     |             |        |                                  |   |   |     |       |      |       |    |   |        |      |      |     |      |
|-----------------------------------------------------------------------------------------------------------------------------------------------------------------------------------------------------------------------------------------------------|-------------|--------|----------------------------------|---|---|-----|-------|------|-------|----|---|--------|------|------|-----|------|
| (P43251) Biotinidase precursor (EC 3.5.1.12)                                                                                                                                                                                                        | BTD_HUMAN   | 58896  | NPVGLIGAENATGETDPSSHK            | K | F | 95% | 81.1  | 38.6 | 9.60  | 1  | 0 | 2095.0 | 320  | 340  | 329 |      |
| (P43307) Translocon-associated protein alpha subunit precursor (TRAP-alpha) (Signal sequence receptor alpha subunit) (SSR-alpha)                                                                                                                    | SSRA_HUMAN  | 32218  | YPQDYQFYQIGNFTALPLNTVVPQR        | R | Q | 95% | 91.2  | 37.6 | 5.64  | 2  | 0 | 3013.5 | 126  | 150  | 136 |      |
| (P43308) Translocon-associated protein beta subunit precursor (TRAP-beta) (Signal sequence receptor beta subunit) (SSR-beta)                                                                                                                        | SSRB_HUMAN  | 20118  | IAPASNV/SHTVLRPLK                | R | A | 95% | 81.4  | 38.5 | 6.55  | 2  | 0 | 1803.0 | 83   | 99   | 88  |      |
| (P48960) CD97 antigen precursor (Leukocyte antigen CD97)                                                                                                                                                                                            | CD97_HUMAN  | 91852  | WCPQGNSSCVNATACR                 | R | C | 95% | 39.0  | 38.9 | 3.28  | 1  | 0 | 1811.7 | 29   | 43   |     | 33   |
| (P50897) Palmitoyl-protein thioesterase 1 precursor (EC 3.1.2.22) (Palmitoyl-protein hydrolase 1)                                                                                                                                                   | PPT1_HUMAN  | 34176  | EDVYRNHSIFLADINQER               | K | G | 95% | 62.4  | 39.2 | 2.80  | 0  | 2 | 2220.1 | 192  | 209  |     | 197  |
| (P50897) Palmitoyl-protein thioesterase 1 precursor (EC 3.1.2.22) (Palmitoyl-protein hydrolase 1)                                                                                                                                                   | PPT1_HUMAN  | 34176  | NHSIFLADINQER                    | R | G | 95% | 74.8  | 39.3 | 4.46  | 2  | 1 | 1557.8 | 197  | 209  |     | 197  |
| (P50897) Palmitoyl-protein thioesterase 1 precursor (EC 3.1.2.22) (Palmitoyl-protein hydrolase 1)                                                                                                                                                   | PPT1_HUMAN  | 34176  | FLNDSIVDPVSEWFGFYR               | K | S | 95% | 103.0 | 38.6 | 8.80  | 2  | 1 | 2307.1 | 230  | 248  | 232 |      |
| (P51688) N-sulphoglucosamine sulphohydrolase precursor (EC 3.10.1.1) (Sulfolglucosamine sulfamidase) (Sulphamidase)                                                                                                                                 | SPHM_HUMAN  | 56678  | NALLLLADDGGFESGAYNNSAIATPHLDALAR | R | R | 95% | 166.0 | 38.8 | 12.80 | 0  | 1 | 3272.6 | 24   | 55   | 41  |      |
| (P51688) N-sulphoglucosamine sulphohydrolase precursor (EC 3.10.1.1) (Sulfolglucosamine sulfamidase) (Sulphamidase)                                                                                                                                 | SPHM_HUMAN  | 56678  | DAGVNLNDTLVIFTSDNGIPFPSSGR       | R | T | 95% | 68.9  | 38.3 | 9.12  | 1  | 0 | 2507.2 | 259  | 282  | 264 |      |
| (P51688) N-sulphoglucosamine sulphohydrolase precursor (EC 3.10.1.1) (Sulfolglucosamine sulfamidase) (Sulphamidase)                                                                                                                                 | SPHM_HUMAN  | 56678  | MPFPIDQDFYVSPTFDLLNR             | K | T | 95% | 63.2  | 38.0 | 6.30  | 2  | 0 | 2560.2 | 394  | 414  |     | 413  |
| (P52803) Ephrin-A5 precursor (EPH-related receptor tyrosine kinase ligand 7) (LERK-7) (AL-1)                                                                                                                                                        | EFNA5_HUMAN | 26279  | YAVVYWNSSNPR                     | R | F | 95% | 60.1  | 39.3 | 1.82  | 1  | 0 | 1357.6 | 32   | 42   | 37  |      |
| (P53634) Dipeptidyl-peptidase 1 precursor (EC 3.4.14.1) (Dipeptidyl-peptidase I) (DPP-I) (DPPI) (Cathepsin C) (Cathepsin J) (Dipeptidyl transferase) [Contains: Dipeptidyl-peptidase 1 exclusion domain chain (Dipeptidyl-peptidase I exclusion dom | CATC_HUMAN  | 51824  | DVNCNSVMGPQEK                    | R | K | 95% | 85.2  | 39.1 | 2.16  | 5  | 0 | 1380.6 | 51   | 62   | 53  |      |
| (P53634) Dipeptidyl-peptidase 1 precursor (EC 3.4.14.1) (Dipeptidyl-peptidase I) (DPP-I) (DPPI) (Cathepsin C) (Cathepsin J) (Dipeptidyl transferase) [Contains: Dipeptidyl-peptidase 1 exclusion domain chain (Dipeptidyl-peptidase I exclusion dom | CATC_HUMAN  | 51824  | VTTYCNETMTGWWHDVLGR              | K | N | 95% | 116.0 | 38.3 | 9.12  | 5  | 3 | 2240.0 | 114  | 132  | 119 |      |
| (P54289) Dihydropyridine-sensitive L-type, calcium channel alpha-2/delta subunits precursor [Contains: L-type calcium channel alpha-2 subunit; L-type calcium channel delta subunit]                                                                | CAC2D_HUMAN | 123169 | ISDNNTEFLNLFNEFIDR               | K | K | 95% | 56.3  | 38.6 | 4.43  | 1  | 0 | 2202.0 | 660  | 677  | 663 |      |
| (P54709) Sodium/potassium-transporting ATPase subunit beta-3 (Sodium/potassium-dependent ATPase beta-3 subunit) (ATPB-3) (CD298 antigen)                                                                                                            | AT1B3_HUMAN | 31496  | FLKPYTLEEQKNLTVCPDGFALFEQK       | K | G | 95% | 53.9  | 38.8 | 6.66  | 0  | 2 | 2969.5 | 113  | 137  |     | 124  |
| (P54852) Epithelial membrane protein 3 (EMP-3) (YMP protein) (Hematopoietic neural membrane protein) (HNMP-1)                                                                                                                                       | EMP3_HUMAN  | 18412  | ESLNLWYDCTWNNDTK                 | K | T | 95% | 74.3  | 38.8 | 3.96  | 2  | 0 | 2059.9 | 35   | 50   |     | 47   |
| (P56159) GDNF family receptor alpha-1 precursor (GFR-alpha-1) (GDNF receptor alpha) (GDNFR-alpha) (TGF-beta-related neurotrophic factor receptor 1) (RET ligand 1)                                                                                  | GFRA1_HUMAN | 51439  | ETNFSLASGLEAK                    | K | D | 95% | 91.4  | 38.9 | 10.70 | 2  | 0 | 1367.7 | 57   | 69   |     | 59   |
| (P56199) Integrin alpha-1 (Laminin and collagen receptor) (VLA-1) (CD49a antigen)                                                                                                                                                                   | ITA1_HUMAN  | 127823 | VYVYVALNQR                       | K | F | 95% | 55.3  | 39.2 | 2.40  | 1  | 0 | 1227.6 | 526  | 535  | 532 |      |
| (P61916) Epididymal secretory protein E1 precursor (Niemann-Pick disease type C2 protein) (hE1)                                                                                                                                                     | NPC2_HUMAN  | 16552  | DCGSVDGVKIVKVN/SPCPTQPCQLSK      | K | G | 95% | 75.6  | 39.0 | 3.05  | 0  | 1 | 2874.3 | 26   | 51   |     | 58   |
| (P61916) Epididymal secretory protein E1 precursor (Niemann-Pick disease type C2 protein) (hE1)                                                                                                                                                     | NPC2_HUMAN  | 16552  | EVNVSPCPTQPCQLSK                 | K | G | 95% | 54.3  | 39.0 | 3.96  | 2  | 0 | 1843.9 | 36   | 51   |     | 58   |
| (P61916) Epididymal secretory protein E1 precursor (Niemann-Pick disease type C2 protein) (hE1)                                                                                                                                                     | NPC2_HUMAN  | 16552  | GGQSYVNVVFTSNIQSK                | K | S | 95% | 111.0 | 38.5 | 5.80  | 14 | 0 | 1860.9 | 52   | 68   |     | 58   |
| (P78324) Tyrosine-protein phosphatase non-receptor type substrate 1 precursor (SHP substrate 1) (SHPS-1) (Inhibitory receptor SHPS-1) (Signal-regulatory protein alpha-1) (Srp-alpha-1) (Srp-alpha-2) (Srp-alpha-3) (MyD-1 antigen) (Brain Ig-I     | SHPS1_HUMAN | 54793  | GTANLSETIR                       | R | V | 95% | 59.9  | 38.8 | 2.19  | 1  | 0 | 1062.5 | 241  | 250  | 244 |      |
| (P78324) Tyrosine-protein phosphatase non-receptor type substrate 1 precursor (SHP substrate 1) (SHPS-1) (Inhibitory receptor SHPS-1) (Signal-regulatory protein alpha-1) (Srp-alpha-1) (Srp-alpha-2) (Srp-alpha-3) (MyD-1 antigen) (Brain Ig-I     | SHPS1_HUMAN | 54793  | AENQVNVTCQVR                     | R | K | 95% | 58.5  | 38.8 | 5.23  | 1  | 0 | 1418.7 | 264  | 275  |     | 269  |
| (Q01459) Di-N-acetylchitobiase precursor (EC 3.2.1.)                                                                                                                                                                                                | DIAC_HUMAN  | 43743  | QINSSISGNLWDKDQR                 | K | A | 95% | 46.1  | 38.5 | 3.80  | 3  | 0 | 1861.9 | 297  | 312  |     | 299  |
| (Q02809) Procollagen-lysine,2-oxoglutarate 5-dioxygenase 1 precursor (EC 1.14.11.4) (Lysyl hydroxylase 1) (LH1)                                                                                                                                     | PLOD1_HUMAN | 83535  | EQINITLDHR                       | R | C | 95% | 43.7  | 38.6 | 2.82  | 1  | 0 | 1239.6 | 194  | 203  |     | 197  |
| (Q07954) Low-density lipoprotein receptor-related protein 1 precursor (LRP) (Alpha-2-macroglobulin receptor) (A2MR) (Apolipoprotein E receptor) (APOER) (CD91 antigen)                                                                              | LRP1_HUMAN  | 504543 | LTSCATNASICGDEAR                 | K | C | 95% | 42.7  | 38.9 | 2.89  | 1  | 0 | 1726.7 | 3782 | 3797 |     | 3788 |

List of Glycopeptide Identified

|                                                                                                                                                                                                                                      |             |        |                              |   |   |     |       |      |       |   |   |        |     |     |        |
|--------------------------------------------------------------------------------------------------------------------------------------------------------------------------------------------------------------------------------------|-------------|--------|------------------------------|---|---|-----|-------|------|-------|---|---|--------|-----|-----|--------|
| (Q08380) Galectin-3-binding protein precursor (Lectin galactoside-binding soluble 3-binding protein) (Mac-2-binding protein) (Mac-2 BP) (MAC2BP) (Tumor-associated antigen 90K)                                                      | LG3BP_HUMAN | 65314  | ALGFENATQALGR                | R | A | 95% | 81.8  | 39.2 | 5.72  | 2 | 0 | 1348.7 | 64  | 76  | 69     |
| (Q08380) Galectin-3-binding protein precursor (Lectin galactoside-binding soluble 3-binding protein) (Mac-2-binding protein) (Mac-2 BP) (MAC2BP) (Tumor-associated antigen 90K)                                                      | LG3BP_HUMAN | 65314  | EPGSNVTMSVDAECVPMVR          | K | D | 95% | 96.1  | 38.4 | 7.03  | 3 | 0 | 2094.9 | 188 | 206 | 192    |
| (Q08380) Galectin-3-binding protein precursor (Lectin galactoside-binding soluble 3-binding protein) (Mac-2-binding protein) (Mac-2 BP) (MAC2BP) (Tumor-associated antigen 90K)                                                      | LG3BP_HUMAN | 65314  | YKGLNLTEDTYKPR               | R | I | 95% | 72.9  | 39.0 | 10.60 | 2 | 2 | 1698.9 | 394 | 407 | 398    |
| (Q08380) Galectin-3-binding protein precursor (Lectin galactoside-binding soluble 3-binding protein) (Mac-2-binding protein) (Mac-2 BP) (MAC2BP) (Tumor-associated antigen 90K)                                                      | LG3BP_HUMAN | 65314  | GLNLTEDTYKPR                 | K | I | 95% | 73.6  | 39.2 | 7.09  | 2 | 0 | 1407.7 | 396 | 407 | 398    |
| (Q08380) Galectin-3-binding protein precursor (Lectin galactoside-binding soluble 3-binding protein) (Mac-2-binding protein) (Mac-2 BP) (MAC2BP) (Tumor-associated antigen 90K)                                                      | LG3BP_HUMAN | 65314  | AAIPSAIDTNSKK                | K | S | 95% | 76.8  | 39.4 | 5.21  | 2 | 0 | 1275.6 | 542 | 554 | 551    |
| (Q08380) Galectin-3-binding protein precursor (Lectin galactoside-binding soluble 3-binding protein) (Mac-2-binding protein) (Mac-2 BP) (MAC2BP) (Tumor-associated antigen 90K)                                                      | LG3BP_HUMAN | 65314  | TVIRPFVLTNSSGVD              | R | - | 95% | 42.8  | 39.1 | 3.92  | 2 | 0 | 1669.8 | 571 | 585 | 580    |
| (Q08722) Leukocyte surface antigen CD47 precursor (Integrin-associated protein) (IAP) (Antigenic surface determinant protein OA3) (MER6)                                                                                             | CD47_HUMAN  | 35197  | SDAVSHITGNYTEVELTR           | K | E | 95% | 82.0  | 38.3 | 14.00 | 1 | 0 | 2140.9 | 103 | 121 | 111    |
| (Q12841) Follistatin-related protein 1 precursor (Follistatin-like 1)                                                                                                                                                                | FSTL1_HUMAN | 34967  | GSNYSEILDK                   | K | Y | 95% | 53.6  | 38.7 | 2.92  | 2 | 0 | 1126.5 | 142 | 151 | 144    |
| (Q12841) Follistatin-related protein 1 precursor (Follistatin-like 1)                                                                                                                                                                | FSTL1_HUMAN | 34967  | GSNYSEILDKYFK                | K | N | 95% | 60.9  | 38.5 | 4.09  | 1 | 0 | 1564.8 | 142 | 154 | 144    |
| (Q13308) Tyrosine-protein kinase-like 7 precursor (Colon carcinoma kinase 4) (CCK-4)                                                                                                                                                 | PTK7_HUMAN  | 118243 | MHIFQNGSLVHVDVAPEDSGR        | R | Y | 95% | 56.5  | 38.8 | 5.51  | 0 | 1 | 2339.1 | 641 | 661 | 646    |
| (Q13510) Acid ceramidase precursor (EC 3.5.1.23) (Acylsphingosine deacylase) (N-acylsphingosine amidohydrolase) (AC) (Putative 32 kDa heart protein) (PHP32) [Contains: Acid ceramidase alpha subunit; Acid ceramidase beta subunit] | ASAH1_HUMAN | 44633  | TVLENSTSYEEAK                | R | N | 95% | 82.7  | 39.2 | 3.70  | 2 | 0 | 1471.7 | 255 | 267 | 259    |
| (Q13510) Acid ceramidase precursor (EC 3.5.1.23) (Acylsphingosine deacylase) (N-acylsphingosine amidohydrolase) (AC) (Putative 32 kDa heart protein) (PHP32) [Contains: Acid ceramidase alpha subunit; Acid ceramidase beta subunit] | ASAH1_HUMAN | 44633  | TVLENSTSYEEAKNLLTK           | R | T | 95% | 107.0 | 38.4 | 8.23  | 2 | 0 | 2041.0 | 255 | 272 | 259    |
| (Q13510) Acid ceramidase precursor (EC 3.5.1.23) (Acylsphingosine deacylase) (N-acylsphingosine amidohydrolase) (AC) (Putative 32 kDa heart protein) (PHP32) [Contains: Acid ceramidase alpha subunit; Acid ceramidase beta subunit] | ASAH1_HUMAN | 44633  | ILAPAYFILGGNQSSEGCVITR       | K | D | 95% | 82.6  | 38.7 | 10.70 | 2 | 0 | 2337.2 | 275 | 296 | 286    |
| (Q13510) Acid ceramidase precursor (EC 3.5.1.23) (Acylsphingosine deacylase) (N-acylsphingosine amidohydrolase) (AC) (Putative 32 kDa heart protein) (PHP32) [Contains: Acid ceramidase alpha subunit; Acid ceramidase beta subunit] | ASAH1_HUMAN | 44633  | TSQENISFETMYDVLSTKPV/LNK     | R | L | 95% | 113.0 | 38.1 | 9.62  | 4 | 0 | 2644.3 | 344 | 366 | 348    |
| (Q13641) Trophoblast glycoprotein precursor (5T4 oncofetal trophoblast glycoprotein) (5T4 oncotrophoblast glycoprotein) (5T4 oncofetal antigen) (M6P1)                                                                               | TPBG_HUMAN  | 46015  | CVNRNLTVEPTDLPAYVR           | K | N | 95% | 0.0   | 0.0  | 7.15  | 1 | 0 | 2101.0 | 77  | 94  | 81     |
| (Q13641) Trophoblast glycoprotein precursor (5T4 oncofetal trophoblast glycoprotein) (5T4 oncotrophoblast glycoprotein) (5T4 oncofetal antigen) (M6P1)                                                                               | TPBG_HUMAN  | 46015  | NLTEVPTDLPAYVR               | R | N | 95% | 39.8  | 39.4 | 2.47  | 1 | 0 | 1588.8 | 81  | 94  | 81     |
| (Q13641) Trophoblast glycoprotein precursor (5T4 oncofetal trophoblast glycoprotein) (5T4 oncotrophoblast glycoprotein) (5T4 oncofetal antigen) (M6P1)                                                                               | TPBG_HUMAN  | 46015  | RPPLAELALNLSGSR              | R | L | 95% | 83.6  | 38.6 | 1.64  | 2 | 0 | 1665.9 | 114 | 129 | 124    |
| (Q13641) Trophoblast glycoprotein precursor (5T4 oncofetal trophoblast glycoprotein) (5T4 oncotrophoblast glycoprotein) (5T4 oncofetal antigen) (M6P1)                                                                               | TPBG_HUMAN  | 46015  | NLTHLES LHLEDNALK            | R | V | 95% | 46.8  | 39.5 | 3.25  | 0 | 1 | 1848.0 | 256 | 271 | 256    |
| (Q13740) CD166 antigen precursor (Activated leukocyte-cell adhesion molecule) (ALCAM)                                                                                                                                                | CD166_HUMAN | 65116  | SVQYDDVPEYKDRNLNLSNYTLISINAR | K | I | 95% | 67.1  | 38.3 | 5.11  | 0 | 2 | 3290.6 | 77  | 104 | 91, 95 |
| (Q13740) CD166 antigen precursor (Activated leukocyte-cell adhesion molecule) (ALCAM)                                                                                                                                                | CD166_HUMAN | 65116  | LNLSNYTLISINAR               | R | I | 95% | 109.0 | 38.6 | 6.82  | 4 | 0 | 1695.9 | 90  | 104 | 91, 95 |
| (Q13740) CD166 antigen precursor (Activated leukocyte-cell adhesion molecule) (ALCAM)                                                                                                                                                | CD166_HUMAN | 65116  | KLGDICISEDYPDGNITWYR         | K | N | 95% | 77.9  | 37.9 | 6.36  | 2 | 2 | 2390.1 | 153 | 172 | 167    |
| (Q13740) CD166 antigen precursor (Activated leukocyte-cell adhesion molecule) (ALCAM)                                                                                                                                                | CD166_HUMAN | 65116  | NAIKEGDNITLK                 | K | C | 95% | 78.2  | 38.9 | 5.03  | 9 | 0 | 1316.7 | 258 | 269 | 265    |
| (Q13740) CD166 antigen precursor (Activated leukocyte-cell adhesion molecule) (ALCAM)                                                                                                                                                | CD166_HUMAN | 65116  | NATVVMWK                     | R | D | 95% | 47.4  | 38.8 | 2.24  | 1 | 0 | 965.5  | 361 | 368 | 361    |
| (Q13740) CD166 antigen precursor (Activated leukocyte-cell adhesion molecule) (ALCAM)                                                                                                                                                | CD166_HUMAN | 65116  | NATVVMWKDNI                  | R | L | 95% | 53.6  | 38.6 | 5.06  | 1 | 0 | 1463.7 | 361 | 372 | 361    |
| (Q13740) CD166 antigen precursor (Activated leukocyte-cell adhesion molecule) (ALCAM)                                                                                                                                                | CD166_HUMAN | 65116  | IIISPEENVLTCTAENQLER         | K | T | 95% | 105.0 | 38.5 | 8.60  | 3 | 0 | 2431.2 | 473 | 493 | 480    |

List of Glycopeptide Identified

|                                                                                                                                                                                                                  |             |        |                                         |   |   |     |       |      |       |   |   |        |     |     |     |     |
|------------------------------------------------------------------------------------------------------------------------------------------------------------------------------------------------------------------|-------------|--------|-----------------------------------------|---|---|-----|-------|------|-------|---|---|--------|-----|-----|-----|-----|
| (Q13740) CD166 antigen precursor (Activated leukocyte-cell adhesion molecule) (ALCAM)                                                                                                                            | CD166_HUMAN | 65116  | TVNSLNVSAISIPHEHDEAIDEISDENR            | R | E | 95% | 92.1  | 37.6 | 6.11  | 1 | 1 | 2855.3 | 494 | 519 | 499 |     |
| (Q13740) CD166 antigen precursor (Activated leukocyte-cell adhesion molecule) (ALCAM)                                                                                                                            | CD166_HUMAN | 65116  | TVNSLNVSAISIPHEHDEAIDEISDENREK          | R | V | 95% | 100.0 | 38.3 | 4.48  | 0 | 2 | 3112.5 | 494 | 521 | 499 |     |
| (Q14108) Lysosome membrane protein 2 (Lysosome membrane protein II) (LIMP II) (Scavenger receptor class B member 2) (85 kDa lysosomal membrane sialoglycoprotein) (LGP85) (CD36 antigen-like 2)                  | SCRB2_HUMAN | 54143  | ANIQFGDNGTTISAVSNK                      |   |   |     |       |      |       |   |   |        |     |     |     | 105 |
| (Q14126) Desmoglein-2 precursor (HDGC)                                                                                                                                                                           | DSG2_HUMAN  | 122367 | DTGELNVTSLDREETPFLLTGYALDAR             | K | A | 95% | 86.8  | 39.1 | 9.30  | 1 | 0 | 1837.9 | 97  | 114 |     |     |
| (Q16563) Synaptophysin-like protein 1 (Pantophysin)                                                                                                                                                              | SYPL1_HUMAN | 28548  | GTGTEIQVNCPPAVTENK                      | K | T | 95% | 74.1  | 38.6 | 4.85  | 1 | 0 | 1885.9 | 56  | 72  |     | 71  |
| (Q5ZPR3) CD276 antigen precursor (Costimulatory molecule) (B7 homolog 3) (B7-H3) (4Ig-B7-H3)                                                                                                                     | CD276_HUMAN | 57216  | QLVHSAFEGQDQGSAYANR                     |   |   |     |       |      |       |   |   |        |     |     |     |     |
| (Q5ZPR3) CD276 antigen precursor (Costimulatory molecule) (B7 homolog 3) (B7-H3) (4Ig-B7-H3)                                                                                                                     | CD276_HUMAN | 57216  | TALFPDLLAQGNASLR                        | K | T | 95% | 0.0   | 0.0  | 14.00 | 2 | 0 | 2061.9 | 74  | 92  |     | 91  |
| (Q5ZPR3) CD276 antigen precursor (Costimulatory molecule) (B7 homolog 3) (B7-H3) (4Ig-B7-H3)                                                                                                                     | CD276_HUMAN | 57216  | VVLGANGTYSCVLR                          | R | L | 95% | 101.0 | 38.7 | 8.05  | 2 | 1 | 1687.9 | 93  | 108 |     | 104 |
| (Q5ZPR3) CD276 antigen precursor (Costimulatory molecule) (B7 homolog 3) (B7-H3) (4Ig-B7-H3)                                                                                                                     | CD276_HUMAN | 57216  | VVLGANGTYSCVLR                          | R | N | 95% | 93.4  | 39.1 | 6.80  | 2 | 0 | 1509.8 | 210 | 223 |     | 215 |
| (Q5ZPR3) CD276 antigen precursor (Costimulatory molecule) (B7 homolog 3) (B7-H3) (4Ig-B7-H3)                                                                                                                     | CD276_HUMAN | 57216  | GYPEAEVFWQDGGVPLTGNVNTSQMANEQGLFDVHSVLR | R | V | 95% | 120.0 | 37.8 | 14.00 | 0 | 2 | 4395.1 | 388 | 427 |     | 407 |
| (Q6EMK4) Vasorin precursor (Protein Silt-like 2)                                                                                                                                                                 | VASN_HUMAN  | 71696  | LHEITNETFR                              | R | G | 95% | 35.7  | 38.8 | 3.51  | 2 | 0 | 1260.6 | 112 | 121 | 117 |     |
| (Q6UX71) Plexin domain-containing protein 2 precursor (Tumor endothelial marker 7-related protein)                                                                                                               | PXDC2_HUMAN | 59565  | SFTDLLDDGQDNNTQIEEDTDHNYYSR             |   |   |     |       |      |       |   |   |        |     |     |     |     |
| (Q86YB8) ERO1-like protein beta precursor (EC 1.8.4.-) (ERO1-Lbeta) (Oxidoreductin-1-Lbeta) (Endoplasmic oxidoreductin-1-like protein B)                                                                         | ERO1B_HUMAN | 53511  | LGAINSTLSNQSK                           | K | E | 95% | 85.1  | 39.3 | 4.29  | 2 | 0 | 1334.7 | 136 | 148 | 140 | 145 |
| (Q8NBK3) Sulfatase-modifying factor 1 precursor (C alpha-formylglycine-generating enzyme 1)                                                                                                                      | SUMF1_HUMAN | 40538  | FVNSTGYLTEAEK                           | K | F | 95% | 93.4  | 39.4 | 5.27  | 1 | 0 | 1459.7 | 139 | 151 | 141 |     |
| (Q8NCC3) 1-O-acylceramide synthase precursor (EC 2.3.1.-) (ACS) (Lysosomal phospholipase A2) (Lysophospholipase 3) (LPLA2) (LCAT-like lysophospholipase) (LLPL)                                                  | LYPA3_HUMAN | 46641  | SAVSTSWLLPYNWTSPEK                      | R | V | 95% | 70.2  | 38.3 | 4.82  | 1 | 0 | 2230.1 | 262 | 280 |     | 273 |
| (Q8NCC3) 1-O-acylceramide synthase precursor (EC 2.3.1.-) (ACS) (Lysosomal phospholipase A2) (Lysophospholipase 3) (LPLA2) (LCAT-like lysophospholipase) (LLPL)                                                  | LYPA3_HUMAN | 46641  | VFVQTPNTINYLTR                          | K | D | 95% | 57.0  | 38.6 | 5.43  | 2 | 0 | 1552.8 | 281 | 293 |     | 289 |
| (Q8WU74) Protein C20orf75 precursor                                                                                                                                                                              | CT075_HUMAN | 78826  | AFACFPALQLLNSCTALGR                     | R | G | 95% | 98.0  | 38.7 | 6.21  | 1 | 0 | 2224.1 | 165 | 184 |     | 176 |
| (Q8WU74) Protein C20orf75 precursor                                                                                                                                                                              | CT075_HUMAN | 78826  | YSAEGWAGNQSVGVIVATAR                    | R | Q | 95% | 106.0 | 38.8 | 8.43  | 1 | 0 | 2200.1 | 614 | 634 |     | 622 |
| (Q92484) Acid sphingomyelinase-like phosphodiesterase 3a precursor (EC 3.1.4.-) (ASM-like phosphodiesterase 3a)                                                                                                  | ASM3A_HUMAN | 51244  | TDPANQFEWLESTLNNSQQNK                   |   |   |     |       |      |       |   |   |        |     |     |     |     |
| (Q92484) Acid sphingomyelinase-like phosphodiesterase 3a precursor (EC 3.1.4.-) (ASM-like phosphodiesterase 3a)                                                                                                  | ASM3A_HUMAN | 51244  | LLDMLQYYLNLTEANLK                       | K | E | 95% | 82.6  | 38.0 | 7.80  | 2 | 0 | 2465.1 | 224 | 244 |     | 238 |
| (Q92820) Gamma-glutamyl hydrolase precursor (EC 3.4.19.9) (Gamma-Glu-X carboxypeptidase) (Conjugase) (GH)                                                                                                        | GGH_HUMAN   | 35948  | WSLSVKNFMTNEK                           | K | G | 95% | 88.2  | 38.1 | 6.64  | 2 | 0 | 2072.1 | 347 | 363 |     | 356 |
| (Q92896) Golgi apparatus protein 1 precursor (Golgi sialoglycoprotein MG-160) (E-selectin ligand 1) (ESL1) (Cysteine-rich fibroblast growth factor receptor) (CFR-1)                                             | GSLG1_HUMAN | 134577 | GNITEYQCHQYITK                          |   |   |     |       |      |       |   |   |        |     |     |     |     |
| (Q92896) Golgi apparatus protein 1 precursor (Golgi sialoglycoprotein MG-160) (E-selectin ligand 1) (ESL1) (Cysteine-rich fibroblast growth factor receptor) (CFR-1)                                             | GSLG1_HUMAN | 134577 | DIVGNLTELESEDIQIALLMR                   | R | M | 95% | 46.4  | 39.0 | 2.68  | 1 | 0 | 1755.8 | 209 | 222 |     | 210 |
| (Q96AY3) FK506-binding protein 10 precursor (EC 5.2.1.8) (Peptidyl-prolyl cis-trans isomerase) (PPIase) (Rotamase) (65 kDa FK506-binding protein) (FKBP65) (Immunophilin FKBP65)                                 | FKB10_HUMAN | 64228  | YHNGTFEDGK                              | R | K | 95% | 55.0  | 38.9 | 3.80  | 1 | 0 | 1331.6 | 67  | 77  |     | 70  |
| (Q96AY3) FK506-binding protein 10 precursor (EC 5.2.1.8) (Peptidyl-prolyl cis-trans isomerase) (PPIase) (Rotamase) (65 kDa FK506-binding protein) (FKBP65) (Immunophilin FKBP65)                                 | FKB10_HUMAN | 64228  | YHNGTLLDGTSTFDTYSYK                     | R | G | 95% | 99.2  | 38.8 | 10.70 | 1 | 0 | 2170.0 | 179 | 197 | 182 |     |
| (Q96AY3) FK506-binding protein 10 precursor (EC 5.2.1.8) (Peptidyl-prolyl cis-trans isomerase) (PPIase) (Rotamase) (65 kDa FK506-binding protein) (FKBP65) (Immunophilin FKBP65)                                 | FKB10_HUMAN | 64228  | YHNCSLLDGTQLFTSHDYGAPEQATLGANK          | R | V | 95% | 97.4  | 38.3 | 6.66  | 0 | 2 | 3472.6 | 404 | 434 | 407 |     |
| (Q96D42) Hepatitis A virus cellular receptor 1 precursor (HAVcr-1) (T cell immunoglobulin and mucin domain-containing protein 1) (TIMD-1) (T cell membrane protein 1) (TIM-1) (TIM)                              | TIMD1_HUMAN | 38701  | GSCSLFTCQNGIVVWGTHTVYTR                 |   |   |     |       |      |       |   |   |        |     |     |     |     |
| (Q96HE7) ERO1-like protein alpha precursor (EC 1.8.4.-) (ERO1-Lalpha) (Oxidoreductin-1-Lalpha) (Endoplasmic oxidoreductin-1-like protein) (ERO1-L)                                                               | ERO1A_HUMAN | 54377  | KWGHNITEFQQR                            | R | K | 95% | 90.7  | 39.1 | 5.89  | 0 | 3 | 2660.2 | 50  | 72  |     | 65  |
| (Q96HE7) ERO1-like protein alpha precursor (EC 1.8.4.-) (ERO1-Lalpha) (Oxidoreductin-1-Lalpha) (Endoplasmic oxidoreductin-1-like protein) (ERO1-L)                                                               | ERO1A_HUMAN | 54377  | WGHNITEFQQR                             | K | F | 95% | 58.1  | 38.7 | 4.82  | 2 | 0 | 1544.8 | 276 | 287 |     | 280 |
| (Q96HE7) ERO1-like protein alpha precursor (EC 1.8.4.-) (ERO1-Lalpha) (Oxidoreductin-1-Lalpha) (Endoplasmic oxidoreductin-1-like protein) (ERO1-L)                                                               | ERO1A_HUMAN | 54377  | WGHNITEFQQR                             | K | F | 95% | 59.2  | 38.8 | 4.59  | 1 | 0 | 1416.7 | 277 | 287 |     | 280 |
| (Q96PD2) Discoidin, CUB and LCCL domain-containing protein 2 precursor (Endothelial and smooth muscle cell-derived neuropilin-like protein) (CUB, LCCL and coagulation factor V/VIII-homology domains protein 1) | DCBD2_HUMAN | 85018  | YCGLGLQMNHISIESK                        | K | G | 95% | 70.3  | 38.5 | 5.68  | 1 | 0 | 1753.8 | 147 | 161 |     | 155 |

List of Glycopeptide Identified

|                                                                                                                                                                                                                                                 |             |        |  |   |   |     |      |       |      |       |   |        |        |     |     |          |
|-------------------------------------------------------------------------------------------------------------------------------------------------------------------------------------------------------------------------------------------------|-------------|--------|--|---|---|-----|------|-------|------|-------|---|--------|--------|-----|-----|----------|
| (Q99519) Sialidase-1 precursor (EC 3.2.1.18) (Lysosomal sialidase) (N-acetyl-alpha-neuraminidase 1) (Acetylneuraminyl hydrolase) (G9 sialidase)                                                                                                 | NEUR1_HUMAN | 45449  |  | R | K | 95% | 57.0 | 39.0  | 0.00 | 2     | 0 | 1228.5 | 348    | 357 | 352 |          |
| (Q99538) Legumain precursor (EC 3.4.22.34) (Asparaginyl endopeptidase) (Protease, cysteine 1)                                                                                                                                                   | LGMN_HUMAN  | 49393  |  |   | K | H   | 95%  | 72.1  | 39.4 | 3.89  | 3 | 0      | 1427.7 | 165 | 175 | 167      |
| (Q9GZM7) Tubulointerstitial nephritis antigen-like precursor (Tubulointerstitial nephritis antigen-related protein) (TIN Ag-related protein) (TIN-Ag-RP) (Glucocorticoid-inducible protein 5) (Oxidized LDL-responsive gene 2 protein) (OLRG-2) | TINAL_HUMAN | 52369  |  |   | R | T   | 95%  | 84.6  | 38.0 | 11.60 | 2 | 0      | 2568.1 | 59  | 79  | 78       |
| (Q9H5V8) CUB domain-containing protein 1 precursor (Transmembrane and associated with src kinases) (Membrane glycoprotein gp140) (Subtractive immunization M plus HEp3 associated 135 kDa protein) (SIMA135) (CD318 antigen)                    | CDCP1_HUMAN | 92858  |  |   | R | I   | 95%  | 72.2  | 38.9 | 2.52  | 2 | 0      | 1299.6 | 174 | 185 | 180      |
| (Q9H5V8) CUB domain-containing protein 1 precursor (Transmembrane and associated with src kinases) (Membrane glycoprotein gp140) (Subtractive immunization M plus HEp3 associated 135 kDa protein) (SIMA135) (CD318 antigen)                    | CDCP1_HUMAN | 92858  |  |   | R | K   | 95%  | 63.1  | 39.0 | 2.80  | 1 | 0      | 1758.8 | 262 | 276 | 270      |
| (Q9HAT2) Sialate O-acetyltransferase precursor (EC 3.1.1.53) (Sialic acid-specific 9-O-acetyltransferase) (H Lse)                                                                                                                               | SIAE_HUMAN  | 58297  |  |   | R | I   | 95%  | 111.0 | 38.4 | 6.62  | 2 | 1      | 1978.0 | 394 | 411 | 401      |
| (Q9HDC9) Adipocyte plasma membrane-associated protein (BSCV protein)                                                                                                                                                                            | APMAP_HUMAN | 46464  |  |   | R | G   | 95%  | 61.3  | 38.7 | 3.39  | 1 | 0      | 1424.7 | 157 | 170 | 160      |
| (Q9P2B2) Prostaglandin F2 receptor negative regulator precursor (Prostaglandin F2-alpha receptor regulatory protein) (Prostaglandin F2-alpha receptor-associated protein) (CD9 partner 1) (CD9P-1) (CD315 antigen)                              | FPRP_HUMAN  | 98538  |  |   | K | A   | 95%  | 58.2  | 38.8 | 4.01  | 1 | 0      | 1451.7 | 294 | 305 | 300      |
| (Q9P2B2) Prostaglandin F2 receptor negative regulator precursor (Prostaglandin F2-alpha receptor regulatory protein) (Prostaglandin F2-alpha receptor-associated protein) (CD9 partner 1) (CD9P-1) (CD315 antigen)                              | FPRP_HUMAN  | 98538  |  |   | K | V   | 94%  | 42.4  | 38.8 | 0.00  | 1 | 0      | 1092.5 | 616 | 624 | 618      |
| (Q9P2B2) Prostaglandin F2 receptor negative regulator precursor (Prostaglandin F2-alpha receptor regulatory protein) (Prostaglandin F2-alpha receptor-associated protein) (CD9 partner 1) (CD9P-1) (CD315 antigen)                              | FPRP_HUMAN  | 98538  |  |   | R | G   | 95%  | 62.4  | 38.4 | 3.00  | 0 | 1      | 3602.8 | 670 | 703 | 691      |
| (Q9UBG0) Macrophage mannose receptor 2 precursor (Urokinase receptor-associated protein) (Endocytic receptor 180) (CD280 antigen)                                                                                                               | MRC2_HUMAN  | 166637 |  |   | R | W   | 95%  | 68.6  | 38.8 | 1.92  | 1 | 0      | 1415.7 | 64  | 76  | 69       |
| (Q9UBG0) Macrophage mannose receptor 2 precursor (Urokinase receptor-associated protein) (Endocytic receptor 180) (CD280 antigen)                                                                                                               | MRC2_HUMAN  | 166637 |  |   | R | G   | 95%  | 61.8  | 38.7 | 2.68  | 1 | 0      | 1303.7 | 138 | 149 | 140      |
| (Q9UBG0) Macrophage mannose receptor 2 precursor (Urokinase receptor-associated protein) (Endocytic receptor 180) (CD280 antigen)                                                                                                               | MRC2_HUMAN  | 166637 |  |   | R | K   | 95%  | 56.3  | 39.3 | 3.96  | 2 | 0      | 1806.8 | 491 | 505 | 497      |
| (Q9UBX1) Cathepsin F precursor (EC 3.4.22.41) (CATSF)                                                                                                                                                                                           | CATF_HUMAN  | 53349  |  |   | K | L   | 95%  | 94.4  | 39.0 | 2.21  | 2 | 0      | 1766.8 | 375 | 389 | 378      |
| (Q9UHG3) Prenylcysteine oxidase precursor (EC 1.8.3.5) (PCL1)                                                                                                                                                                                   | PCYOX_HUMAN | 56595  |  |   | K | T   | 95%  | 72.7  | 39.3 | 8.28  | 2 | 1      | 1758.9 | 182 | 197 | 196      |
| (Q9UHG3) Prenylcysteine oxidase precursor (EC 1.8.3.5) (PCL1)                                                                                                                                                                                   | PCYOX_HUMAN | 56595  |  |   | K | F   | 95%  | 74.1  | 38.5 | 6.82  | 2 | 0      | 1664.8 | 350 | 364 | 353      |
| (Q9UHL4) Dipeptidyl-peptidase 2 precursor (EC 3.4.14.2) (Dipeptidyl-peptidase II) (DPP II) (Dipeptidyl aminopeptidase II) (Quiescent cell proline dipeptidase) (Dipeptidyl peptidase 7)                                                         | DPP2_HUMAN  | 54311  |  |   | R | F   | 95%  | 45.5  | 39.1 | 1.49  | 1 | 0      | 1095.6 | 48  | 56  | 50       |
| (Q9UHL4) Dipeptidyl-peptidase 2 precursor (EC 3.4.14.2) (Dipeptidyl-peptidase II) (DPP II) (Dipeptidyl aminopeptidase II) (Quiescent cell proline dipeptidase) (Dipeptidyl peptidase 7)                                                         | DPP2_HUMAN  | 54311  |  |   | R | L   | 95%  | 133.0 | 38.2 | 5.55  | 1 | 0      | 2260.0 | 308 | 327 | 315      |
| (Q9UNW1) Multiple inositol polyphosphate phosphatase 1 precursor (EC 3.1.3.62) (Inositol (1,3,4,5)-tetrakisphosphate 3-phosphatase) (Ins(1,3,4,5)P(4) 3-phosphatase)                                                                            | MINP1_HUMAN | 55035  |  |   | K | T   | 95%  | 65.6  | 38.8 | 4.72  | 0 | 1      | 2211.1 | 235 | 253 | 242      |
| (Q9Y2E5) Epididymis-specific alpha-mannosidase precursor (EC 3.2.1.24) (Mannosidase alpha class 2B member 2)                                                                                                                                    | MA2B2_HUMAN | 113870 |  |   | R | S   | 95%  | 0.0   | 0.0  | 8.77  | 0 | 2      | 2955.3 | 204 | 227 | 226      |
| (Q9Y2E5) Epididymis-specific alpha-mannosidase precursor (EC 3.2.1.24) (Mannosidase alpha class 2B member 2)                                                                                                                                    | MA2B2_HUMAN | 113870 |  |   | R | H   | 95%  | 74.4  | 38.1 | 7.59  | 0 | 1      | 3985.0 | 502 | 538 | 516      |
| (Q9Y2E5) Epididymis-specific alpha-mannosidase precursor (EC 3.2.1.24) (Mannosidase alpha class 2B member 2)                                                                                                                                    | MA2B2_HUMAN | 113870 |  |   | R | S   | 95%  | 50.3  | 38.7 | 6.02  | 2 | 0      | 1463.6 | 670 | 681 | 670, 675 |

List of Glycopeptide Identified

|                                                                                                                                                                 |             |        |                                          |   |   |     |      |      |      |   |   |        |     |     |     |     |
|-----------------------------------------------------------------------------------------------------------------------------------------------------------------|-------------|--------|------------------------------------------|---|---|-----|------|------|------|---|---|--------|-----|-----|-----|-----|
| (Q9Y2E5) Epididymis-specific alpha-mannosidase precursor (EC 3.2.1.24) (Mannosidase alpha class 2B member 2)                                                    | MA2B2_HUMAN | 113870 | RPYVSYVNNNSIAR                           | R | N | 95% | 57.2 | 39.2 | 2.35 | 2 | 1 | 1539.8 | 741 | 753 |     | 748 |
| (Q9Y4K0) Lysyl oxidase homolog 2 precursor (EC 1.4.3.-) (Lysyl oxidase-like protein 2) (Lysyl oxidase-related protein 2) (Lysyl oxidase-related protein WS9-14) | LOXL2_HUMAN | 86705  | LGQPQVSLDPMKNVTCENGLPAVVSCVPGQVFSFDGSPSR | K | F | 95% | 87.8 | 38.2 | 6.92 | 0 | 2 | 4026.9 | 277 | 314 |     | 288 |
| (Q9Y4L1) 150 kDa oxygen-regulated protein precursor (Orp150) (Hypoxia up-regulated 1)                                                                           | HYOU1_HUMAN | 111319 | VFGSQNLTTVK                              | R | L | 95% | 71.2 | 39.0 | 4.64 | 1 | 0 | 1194.6 | 510 | 520 | 515 |     |
| (Q9Y4L1) 150 kDa oxygen-regulated protein precursor (Orp150) (Hypoxia up-regulated 1)                                                                           | HYOU1_HUMAN | 111319 | LSALDNLLNHSSMFLK                         | R | G | 95% | 56.3 | 38.7 | 5.96 | 2 | 1 | 1820.9 | 822 | 837 | 830 |     |
| (Q9Y4L1) 150 kDa oxygen-regulated protein precursor (Orp150) (Hypoxia up-regulated 1)                                                                           | HYOU1_HUMAN | 111319 | VINETWAWK                                | K | N | 95% | 58.1 | 38.8 | 1.96 | 2 | 0 | 1147.6 | 860 | 868 | 862 |     |
| (Q9Y4L1) 150 kDa oxygen-regulated protein precursor (Orp150) (Hypoxia up-regulated 1)                                                                           | HYOU1_HUMAN | 111319 | AEPPLNASASDQGEK                          | R | V | 95% | 93.0 | 39.0 | 7.62 | 3 | 0 | 1514.7 | 926 | 940 | 931 |     |
| (Q9Y680) FK506-binding protein 7 precursor (EC 5.2.1.8) (Peptidyl-prolyl cis-trans isomerase) (PPlase) (Rotamase) (FKBP-23)                                     | FKBP7_HUMAN | 29992  | EESTEEVKIEVLRHPENCCK                     | K | T | 95% | 59.0 | 39.0 | 1.28 | 0 | 2 | 2414.2 | 29  | 48  |     | 45  |
| (Q9Y680) FK506-binding protein 7 precursor (EC 5.2.1.8) (Peptidyl-prolyl cis-trans isomerase) (PPlase) (Rotamase) (FKBP-23)                                     | FKBP7_HUMAN | 29992  | IEVLRHPENCCK                             | K | T | 95% | 52.6 | 38.8 | 4.11 | 1 | 0 | 1482.7 | 37  | 48  |     | 45  |
|                                                                                                                                                                 |             |        |                                          |   |   |     |      |      |      |   |   |        |     |     |     |     |
|                                                                                                                                                                 |             |        |                                          |   |   |     |      |      |      |   |   |        |     |     |     |     |
|                                                                                                                                                                 |             |        |                                          |   |   |     |      |      |      |   |   |        |     |     |     |     |

# List of Glycopeptide Identified

## GlycoPeptide Identified in FTC-133 Cell Line

Experiment: FTC133-p16-P17-PNGF

Peak List Generator: Version: BioWorks 3.3.1  
 Charge States Calculated: yes  
 Database Set: Database Name: the Sprot\_060206 database  
 Version: 06/26/06  
 Taxonomy: Homo sapiens  
 Number of Proteins: 14164  
 Search Engine Set: 2 Search Engines  
 Search Engine: Mascot; Version: 2.1.03  
 Fragment Tolerance: 0.80 Da (Monoisotopic)  
 Parent Tolerance: 1.6 Da (Monoisotopic)  
 Fixed Modifications: +57 on C (Carbamidomethyl)  
 Variable Modifications: +1 on N (Deamidation), +16 on M (Oxidation)  
 Database: the Sprot\_060206 database (selected for Homo sapiens, unknown version, 14164 entries)  
 Digestion Enzyme: Trypsin; Max Missed Cleavages: 2  
 Search Engine: XI Tandem; Version: 2007.01.01.1  
 Fragment Tolerance: 0.100 Da (Monoisotopic)  
 Parent Tolerance: 1.6 Da (Monoisotopic)  
 Fixed Modifications: +57 on C (Carbamidomethyl)  
 Variable Modifications: +1 on N (Deamidation), +16 on M (Oxidation)  
 Database: a subset of the uniprot\_sprot\_060206-oval database  
 Digestion Enzyme: Trypsin; Max Missed Cleavages: 2  
 Scaffold Version: Scaffold-2\_00\_00\_final

| Protein name                                                                                                                                                                                                                                         | Swiss-Prot Accession Name | Protein molecular weight (Da) | Peptide sequence           | Previous amino acid | Next amino acid | Best Peptide identification probability | Best Mascot Ion score | Best Mascot Identity score | Best XI Tandem - log(e) score | Number of identified +2H spectra | Number of identified +3H spectra | Calculated +1H Peptide Mass (AMU) | Peptide start index | Peptide stop index | N-linked Site | Potential N-linked site |
|------------------------------------------------------------------------------------------------------------------------------------------------------------------------------------------------------------------------------------------------------|---------------------------|-------------------------------|----------------------------|---------------------|-----------------|-----------------------------------------|-----------------------|----------------------------|-------------------------------|----------------------------------|----------------------------------|-----------------------------------|---------------------|--------------------|---------------|-------------------------|
| [O14773] Tripeptidyl-peptidase 1 precursor (EC 3.4.14.9) (Tripeptidyl-peptidase I) (TPP-I) (Tripeptidyl aminopeptidase) (Lysosomal pepstatin insensitive protease) (LPIC) (Growth-inhibiting gene 1 protein)                                         | TPP1_HUMAN                | 61230                         | FLSSSPHLPPSSYFNASGR        | K                   | A               | 95.00%                                  | 46.9                  | 39.2                       | 2.28                          | 0                                | 1                                | 2051.98                           | 429                 | 447                | 443           |                         |
| [O43852] Calumenin precursor (Crocaltin) (IEF SSP 9302)                                                                                                                                                                                              | CALU_HUMAN                | 37090                         | NATYGYVLDDPDDGDFNYK        | K                   | Q               | 95.00%                                  | 99.1                  | 38.6                       | 8.59                          | 1                                | 0                                | 2279.96                           | 131                 | 150                |               | 131                     |
| [P01033] Metalloproteinase inhibitor 1 precursor (TIMP-1) (Erythroid potentiating activity) (EPA) (Tissue inhibitor of metalloproteinases) (Fibroblast collagenase inhibitor) (Collagenase inhibitor)                                                | TIMP1_HUMAN               | 23153                         | FVGTPEVNVQTTLYQR           | K                   | Y               | 95.00%                                  | 59.7                  | 38.6                       | 4.7                           | 1                                | 0                                | 1753.88                           | 46                  | 60                 | 53            |                         |
| [P04216] Thy-1 membrane glycoprotein precursor (Thy-1 antigen) (CD90 antigen) (CDw90 antigen)                                                                                                                                                        | THY1_HUMAN                | 17917                         | LDRCRHENTSSPIQYEFSLTR      | R                   | E               | 95.00%                                  | 86                    | 38.7                       | 7.1                           | 0                                | 1                                | 2541.17                           | 36                  | 56                 | 42            |                         |
| [P04216] Thy-1 membrane glycoprotein precursor (Thy-1 antigen) (CD90 antigen) (CDw90 antigen)                                                                                                                                                        | THY1_HUMAN                | 17917                         | HENTSSPIQYEFSLTR           | R                   | E               | 95.00%                                  | 116                   | 38.3                       | 9.59                          | 5                                | 3                                | 1996.93                           | 40                  | 56                 | 42            |                         |
| [P04216] Thy-1 membrane glycoprotein precursor (Thy-1 antigen) (CD90 antigen) (CDw90 antigen)                                                                                                                                                        | THY1_HUMAN                | 17917                         | DEGTYTCALHSHGHSPPISQNVTVLR | K                   | D               | 95.00%                                  | 94.5                  | 37.1                       | 5.85                          | 1                                | 0                                | 2964.39                           | 98                  | 124                | 119           |                         |
| [P06756] Integrin alpha-V precursor (Vitronectin receptor alpha subunit) (CD51 antigen) [Contains: Integrin alpha-V heavy chain; Integrin alpha-V light chain]                                                                                       | ITAV_HUMAN                | 116037                        | TAADTTGLQPILNQFTPANISR     | R                   | Q               | 95.00%                                  | 107                   | 38.4                       | 7.39                          | 1                                | 1                                | 2330.20                           | 597                 | 618                | 615           |                         |
| [P06866] Beta-hexosaminidase alpha chain precursor (EC 3.2.1.52) (N-acetyl-beta-glucosaminidase) (Beta-N-acetylhexosaminidase) (Hexosaminidase A)                                                                                                    | HEXA_HUMAN                | 60690                         | SAEGTFFINK                 | K                   | T               | 200.00%                                 | 59.79                 | 39.09                      | 3.37                          | 1                                | 0                                | 1114.34                           | 149                 | 158                | 157           |                         |
| [P07339] Cathepsin D precursor (EC 3.4.23.5) [Contains: Cathepsin D light chain; Cathepsin D heavy chain]                                                                                                                                            | CATD_HUMAN                | 44535                         | GSLSLYNVTR                 | K                   | K               | 95.00%                                  | 87.1                  | 38.9                       | 0.959                         | 9                                | 0                                | 1110.58                           | 257                 | 266                | 263           |                         |
| [P07602] Proactivator polypeptide precursor [Contains: Saposin A (Protein A); Saposin B-Val; Saposin B (Sphingolipid activator protein 1) (SAP-1) (Cerebroside sulfate activator) (CSAct) (Dispersin) (Sulfatide/GM1 activator); Saposin C (Co-beta- | SAP_HUMAN                 | 58094                         | DVVTAAAGDMLKDNATEEEILVYLEK | K                   | T               | 95.00%                                  | 77.5                  | 37.4                       | 4.96                          | 1                                | 1                                | 2783.36                           | 68                  | 92                 | 80            |                         |
| [P07602] Proactivator polypeptide precursor [Contains: Saposin A (Protein A); Saposin B-Val; Saposin B (Sphingolipid activator protein 1) (SAP-1) (Cerebroside sulfate activator) (CSAct) (Dispersin) (Sulfatide/GM1 activator); Saposin C (Co-beta- | SAP_HUMAN                 | 58094                         | DNATEEEILVYLEK             | K                   | T               | 95.00%                                  | 84                    | 39.2                       | 3.33                          | 2                                | 2                                | 1666.81                           | 79                  | 92                 | 80            |                         |
| [P07602] Proactivator polypeptide precursor [Contains: Saposin A (Protein A); Saposin B-Val; Saposin B (Sphingolipid activator protein 1) (SAP-1) (Cerebroside sulfate activator) (CSAct) (Dispersin) (Sulfatide/GM1 activator); Saposin C (Co-beta- | SAP_HUMAN                 | 58094                         | TNSTFVQALVEHVK             | R                   | E               | 95.00%                                  | 80.9                  | 39.1                       | 4.29                          | 2                                | 0                                | 1573.82                           | 214                 | 227                | 215           |                         |

List of Glycopeptide Identified

|                                                                                                                                                                                                                                                      |             |        |  |  |  |   |   |        |      |      |      |   |   |         |      |      |       |            |
|------------------------------------------------------------------------------------------------------------------------------------------------------------------------------------------------------------------------------------------------------|-------------|--------|--|--|--|---|---|--------|------|------|------|---|---|---------|------|------|-------|------------|
| (P07602) Proactivator polypeptide precursor [Contains: Saposin A (Protein A); Saposin B-Val; Saposin B (Sphingolipid activator protein 1) (SAP-1) (Cerebroside sulfate activator) (CSAct) (Dispersin) (Sulfatide/GM1 activator); Saposin C (Co-beta- | SAP_HUMAN   | 58094  |  |  |  | R | L | 95.00% | 93.8 | 38.3 | 9.7  | 2 | 4 | 2263.07 | 214  | 232  | 215   |            |
| (P07602) Proactivator polypeptide precursor [Contains: Saposin A (Protein A); Saposin B-Val; Saposin B (Sphingolipid activator protein 1) (SAP-1) (Cerebroside sulfate activator) (CSAct) (Dispersin) (Sulfatide/GM1 activator); Saposin C (Co-beta- | SAP_HUMAN   | 58094  |  |  |  | K | M | 95.00% | 49   | 38.2 | 8.41 | 1 | 0 | 2007.03 | 328  | 344  | 332   |            |
| (P07602) Proactivator polypeptide precursor [Contains: Saposin A (Protein A); Saposin B-Val; Saposin B (Sphingolipid activator protein 1) (SAP-1) (Cerebroside sulfate activator) (CSAct) (Dispersin) (Sulfatide/GM1 activator); Saposin C (Co-beta- | SAP_HUMAN   | 58094  |  |  |  | R | G | 95.00% | 91.9 | 38.4 | 6.48 | 1 | 3 | 1930.05 | 422  | 438  | 426   |            |
| (P07602) Proactivator polypeptide precursor [Contains: Saposin A (Protein A); Saposin B-Val; Saposin B (Sphingolipid activator protein 1) (SAP-1) (Cerebroside sulfate activator) (CSAct) (Dispersin) (Sulfatide/GM1 activator); Saposin C (Co-beta- | SAP_HUMAN   | 58094  |  |  |  | K | G | 95.00% | 57.9 | 39.1 | 2.51 | 1 | 0 | 1445.79 | 426  | 438  | 426   |            |
| (P07711) Cathepsin L precursor (EC 3.4.22.15) (Major excreted protein) (MEP) [Contains: Cathepsin L heavy chain; Cathepsin L light chain]                                                                                                            | CATL1_HUMAN | 37546  |  |  |  | K | Q | 95.00% | 85.8 | 38.7 | 9.02 | 2 | 0 | 1526.74 | 217  | 230  | 221   |            |
| (P07942) Laminin beta-1 chain precursor (Laminin B1 chain)                                                                                                                                                                                           | LAMB1_HUMAN | 198045 |  |  |  | R | D | 95.00% | 66.9 | 38.7 | 3.24 | 1 | 1 | 2052.94 | 1335 | 1353 |       | 1336, 1343 |
| (P07942) Laminin beta-1 chain precursor (Laminin B1 chain)                                                                                                                                                                                           | LAMB1_HUMAN | 198045 |  |  |  | K | E | 95.00% | 65.5 | 38.7 | 6.37 | 1 | 0 | 2163.99 | 1531 | 1548 |       | 1542       |
| (P08174) Complement decay-accelerating factor precursor (CD55 antigen)                                                                                                                                                                               | DAF_HUMAN   | 41382  |  |  |  | K | S | 95.00% | 48.9 | 39.3 | 2.41 | 1 | 0 | 1628.67 | 84   | 96   |       | 95         |
| (P08648) Integrin alpha-5 precursor (Fibronectin receptor alpha subunit) (Integrin alpha-F) (VLA-5) (CD49e antigen) [Contains: Integrin alpha-5 heavy chain; Integrin alpha-5 light chain]                                                           | ITA5_HUMAN  | 114521 |  |  |  | K | S | 95.00% | 124  | 38.5 | 11.6 | 2 | 0 | 1857.92 | 296  | 312  |       | 307        |
| (P08648) Integrin alpha-5 precursor (Fibronectin receptor alpha subunit) (Integrin alpha-F) (VLA-5) (CD49e antigen) [Contains: Integrin alpha-5 heavy chain; Integrin alpha-5 light chain]                                                           | ITA5_HUMAN  | 114521 |  |  |  | K | L | 95.00% | 76.7 | 38.5 | 7.82 | 2 | 0 | 1480.70 | 771  | 783  |       | 773        |
| (P10619) Lysosomal protective protein precursor (EC 3.4.16.5) (Cathepsin A) (Carboxypeptidase C) (Protective protein for beta-galactosidase) [Contains: Lysosomal protective protein 32 kDa chain; Lysosomal protective protein 20 kDa chain]        | PPGB_HUMAN  | 54450  |  |  |  | R | K | 95.00% | 94.7 | 38   | 9.14 | 1 | 1 | 2403.06 | 327  | 347  |       |            |
| (P11047) Laminin gamma-1 chain precursor (Laminin B2 chain)                                                                                                                                                                                          | LAMC1_HUMAN | 177587 |  |  |  | K | I | 95.00% | 49.5 | 39   | 1.06 | 1 | 0 | 1016.60 | 647  | 655  | 650   |            |
| (P11047) Laminin gamma-1 chain precursor (Laminin B2 chain)                                                                                                                                                                                          | LAMC1_HUMAN | 177587 |  |  |  | K | T | 95.00% | 102  | 38.7 | 6.48 | 2 | 0 | 1682.82 | 1203 | 1217 |       | 1205       |
| (P11047) Laminin gamma-1 chain precursor (Laminin B2 chain)                                                                                                                                                                                          | LAMC1_HUMAN | 177587 |  |  |  | R | K | 95.00% | 61.7 | 39   | 3.29 | 1 | 0 | 1935.93 | 1218 | 1234 | 1223  |            |
| (P11166) Solute carrier family 2, facilitated glucose transporter member 1 (Glucose transporter type 1, erythrocyte/brain) (HepG2 glucose transporter)                                                                                               | GTR1_HUMAN  | 54101  |  |  |  | K | Y | 95.00% | 80.3 | 38.4 | 8.4  | 2 | 1 | 1721.83 | 39   | 51   | 45    |            |
| (P11279) Lysosome-associated membrane glycoprotein 1 precursor (LAMP-1) (CD107a antigen)                                                                                                                                                             | LAMP1_HUMAN | 44756  |  |  |  | K | S | 95.00% | 81.3 | 38.2 | 7.82 | 1 | 2 | 2180.05 | 57   | 76   | 61.75 |            |
| (P11279) Lysosome-associated membrane glycoprotein 1 precursor (LAMP-1) (CD107a antigen)                                                                                                                                                             | LAMP1_HUMAN | 44756  |  |  |  | K | S | 95.00% | 95.1 | 38.5 | 6.38 | 1 | 0 | 1810.85 | 61   | 76   | 61.75 |            |
| (P11279) Lysosome-associated membrane glycoprotein 1 precursor (LAMP-1) (CD107a antigen)                                                                                                                                                             | LAMP1_HUMAN | 44756  |  |  |  | K | G | 95.00% | 70.8 | 38.9 | 4.92 | 2 | 0 | 1506.74 | 82   | 95   | 83    |            |
| (P11279) Lysosome-associated membrane glycoprotein 1 precursor (LAMP-1) (CD107a antigen)                                                                                                                                                             | LAMP1_HUMAN | 44756  |  |  |  | R | N | 95.00% | 45   | 38.9 | 3.49 | 1 | 0 | 1160.61 | 96   | 105  | 102   |            |
| (P13473) Lysosome-associated membrane glycoprotein 2 precursor (LAMP-2) (CD107b antigen)                                                                                                                                                             | LAMP2_HUMAN | 44943  |  |  |  | K | Y | 95.00% | 36.5 | 38.8 | 5.04 | 1 | 0 | 1098.50 | 46   | 53   | 49    |            |
| (P13473) Lysosome-associated membrane glycoprotein 2 precursor (LAMP-2) (CD107b antigen)                                                                                                                                                             | LAMP2_HUMAN | 44943  |  |  |  | K | S | 95.00% | 58.7 | 38.6 | 1.39 | 0 | 2 | 2029.96 | 248  | 266  | 257   |            |
| (P13987) CD59 glycoprotein precursor (Membrane attack complex inhibition factor) (MACIF) (MAC-inhibitory protein) (MAC-IP) (Protectin) (MEM43 antigen) (Membrane inhibitor of reactive lysis) (MIRL) (20 kDa homologous restriction factor) (HRF-20) | CD59_HUMAN  | 14159  |  |  |  | K | A | 95.00% | 110  | 39.3 | 7.36 | 2 | 0 | 1802.79 | 40   | 55   | 43    |            |
| (P15586) N-acetylglucosamine-6-sulfatase precursor (EC 3.1.6.14) (G6S) (Glucosamine-6-sulfatase)                                                                                                                                                     | GNS_HUMAN   | 62066  |  |  |  | K | S | 95.00% | 66.9 | 39.3 | 4.64 | 0 | 2 | 2209.96 | 103  | 121  |       | 111        |
| (P15586) N-acetylglucosamine-6-sulfatase precursor (EC 3.1.6.14) (G6S) (Glucosamine-6-sulfatase)                                                                                                                                                     | GNS_HUMAN   | 62066  |  |  |  | K | A | 95.00% | 74.8 | 38.6 | 4.09 | 1 | 0 | 1337.63 | 181  | 191  | 189   |            |



List of Glycopeptide Identified

|                                                                                                                                                                                                                                                      |             |        |                                  |   |   |        |      |      |      |   |   |          |      |      |     |      |
|------------------------------------------------------------------------------------------------------------------------------------------------------------------------------------------------------------------------------------------------------|-------------|--------|----------------------------------|---|---|--------|------|------|------|---|---|----------|------|------|-----|------|
| (P15586) N-acetylglucosamine-6-sulfatase precursor (EC 3.1.6.14) (G6S) (Glucosamine-6-sulfatase)                                                                                                                                                     | GNS_HUMAN   | 62066  | TPMTNSSIQFLDNAFR                 | K | K | 95.00% | 124  | 38.9 | 9.92 | 4 | 0 | 1858.86  | 275  | 290  | 279 |      |
| (P15586) N-acetylglucosamine-6-sulfatase precursor (EC 3.1.6.14) (G6S) (Glucosamine-6-sulfatase)                                                                                                                                                     | GNS_HUMAN   | 62066  | GASNLWTR                         | R | S | 95.00% | 54.8 | 39   | 2.38 | 1 | 0 | 905.45   | 402  | 409  |     | 405  |
| (P16070) CD44 antigen precursor (Phagocytic glycoprotein I) (PGP-1) (HUTCH-1) (Extracellular matrix receptor-III) (ECMR-III) (GP90 lymphocyte homing/adhesion receptor) (Hermes antigen) (Hyaluronate receptor) (Heparan sulfate proteoglycan) (Epi) | CD44_HUMAN  | 81535  | AFNSTLPTMAQMEK                   | K | A | 95.00% | 77.8 | 38.6 | 6.43 | 9 | 0 | 1601.72  | 55   | 68   | 57  |      |
| (P26006) Integrin alpha-3 precursor (Galactoprotein B3) (GAPB3) (VLA-3 alpha chain) (FRP-2) (CD49c antigen) [Contains: Integrin alpha-3 heavy chain; Integrin alpha-3 light chain]                                                                   | ITA3_HUMAN  | 118682 | NITIVTGAPR                       | K | H | 95.00% | 59.3 | 38.8 | 2.14 | 1 | 0 | 1042.59  | 265  | 274  |     | 265  |
| (P32970) Tumor necrosis factor ligand superfamily member 7 (CD27 ligand) (CD27-L) (CD70 antigen)                                                                                                                                                     | TNFL7_HUMAN | 21100  | FAQAQQQLPLESLGWDVAELQLNHTGPGQDPR | R | L | 95.00% | 71.3 | 38.5 | 4.64 | 0 | 2 | 3615.78  | 41   | 72   |     | 63   |
| (P32970) Tumor necrosis factor ligand superfamily member 7 (CD27 ligand) (CD27-L) (CD70 antigen)                                                                                                                                                     | TNFL7_HUMAN | 21100  | GDTLCTNLTGTLPSR                  | R | N | 95.00% | 65.1 | 39.1 | 2.66 | 2 | 0 | 1719.86  | 164  | 179  |     | 170  |
| (P35052) Glypican-1 precursor                                                                                                                                                                                                                        | GPC1_HUMAN  | 61633  | SFDDHFQHLNDSER                   | R | T | 95.00% | 48.3 | 39   | 1.46 | 0 | 1 | 1860.82  | 106  | 120  |     | 116  |
| (P35613) Basigin precursor (Leukocyte activation antigen M6) (Collagenase stimulatory factor) (Extracellular matrix metalloproteinase inducer) (EMMPRIN) (5F7) (Tumor cell-derived collagenase stimulatory factor) (TCSF) (OK blood group antigen)   | BASI_HUMAN  | 42182  | ILLTCSLNSDSEATEVTGHR             | K | W | 95.00% | 82.2 | 38.3 | 7.48 | 1 | 0 | 1987.98  | 153  | 170  | 160 |      |
| (P42892) Endothelin-converting enzyme 1 (EC 3.4.24.71) (ECE-1)                                                                                                                                                                                       | ECE1_HUMAN  | 87147  | HLEENSTASVSEAR                   | K | K | 95.00% | 74   | 38.9 | 8.41 | 2 | 1 | 1643.79  | 162  | 176  |     | 166  |
| (P42892) Endothelin-converting enzyme 1 (EC 3.4.24.71) (ECE-1)                                                                                                                                                                                       | ECE1_HUMAN  | 87147  | LGGWNITGPWAK                     | R | D | 95.00% | 47.4 | 38.6 | 4.41 | 2 | 0 | 1300.67  | 206  | 217  | 210 |      |
| (P51688) N-sulphoglucosamine sulphohydrolase precursor (EC 3.10.1.1) (Sulfooglucosamine sulfamidase) (Sulphamidase)                                                                                                                                  | SPHM_HUMAN  | 56678  | NALLLLADDGGFESGAYNNSAIATPHLDALAR | R | R | 95.00% | 157  | 38.8 | 12   | 0 | 2 | 3273.59  | 24   | 55   | 41  |      |
| (P53634) Dipeptidyl-peptidase 1 precursor (EC 3.4.14.1) (Dipeptidyl-peptidase I) (DPP-I) (DPPI) (Cathepsin C) (Cathepsin J) (Dipeptidyl transferase) [Contains: Dipeptidyl-peptidase 1 exclusion domain chain (Dipeptidyl-peptidase I exclusion dom  | CATC_HUMAN  | 51824  | DVNCVSMGQPEK                     | R | K | 95.00% | 44.8 | 39.1 | 3.14 | 1 | 0 | 1380.58  | 51   | 62   | 53  |      |
| (P53634) Dipeptidyl-peptidase 1 precursor (EC 3.4.14.1) (Dipeptidyl-peptidase I) (DPP-I) (DPPI) (Cathepsin C) (Cathepsin J) (Dipeptidyl transferase) [Contains: Dipeptidyl-peptidase 1 exclusion domain chain (Dipeptidyl-peptidase I exclusion dom  | CATC_HUMAN  | 51824  | VTTYCNETMTGWWHVDLGR              | K | N | 95.00% | 75.6 | 38.3 | 5.8  | 2 | 0 | 2256.01  | 114  | 132  | 119 |      |
| (P55290) Cadherin-13 precursor (Truncated-cadherin) (T-cadherin) (T-cad) (Heart-cadherin) (H-cadherin) (P105)                                                                                                                                        | CAD13_HUMAN | 78270  | QEDLSVGSVLLTVNATDPSLQHTIR        | R | Y | 95.00% | 75.4 | 38.6 | 6.72 | 0 | 1 | 2937.48  | 487  | 513  | 500 |      |
| (P55290) Cadherin-13 precursor (Truncated-cadherin) (T-cadherin) (T-cad) (Heart-cadherin) (H-cadherin) (P105)                                                                                                                                        | CAD13_HUMAN | 78270  | ANYNLPIMVTDGSKPPMTNITDLR         | K | V | 95.00% | 59   | 39   | 3.46 | 0 | 2 | 2695.30  | 653  | 676  |     | 671  |
| (Q08380) Galectin-3-binding protein precursor (Lectin galactoside-binding soluble 3-binding protein) (Mac-2-binding protein) (Mac-2 BP) (MAC2BP) (Tumor-associated antigen 90K)                                                                      | LG3BP_HUMAN | 65314  | ALGFENATQALGR                    | R | A | 95.00% | 76   | 39.1 | 7.14 | 2 | 0 | 1348.69  | 64   | 76   | 69  |      |
| (Q13449) Limbic system-associated membrane protein precursor (LSAMP)                                                                                                                                                                                 | LSAMP_HUMAN | 37290  | LGVTNLSLVLFRPGSVR                | K | G | 95.00% | 80.1 | 39.1 | 3.14 | 0 | 1 | 1787.02  | 296  | 312  |     | 300  |
| (Q13510) Acid ceramidase precursor (EC 3.5.1.23) (Acylsphingosine deacylase) (N-acylsphingosine amidohydrolase) (AC) (Putative 32 kDa heart protein) (PHP32) [Contains: Acid ceramidase alpha subunit; Acid ceramidase beta subunit]                 | ASAH1_HUMAN | 44633  | TVLENSTSYEEAK                    | R | N | 95.00% | 85.3 | 38.9 | 3.35 | 2 | 0 | 1471.68  | 255  | 267  | 259 |      |
| (Q13641) Trophoblast glycoprotein precursor (5T4 oncofetal trophoblast glycoprotein) (5T4 oncotrophoblast glycoprotein) (5T4 oncofetal antigen) (M6P1)                                                                                               | TPBG_HUMAN  | 46015  | RPPLAELAALLNSGSR                 | R | L | 95.00% | 56   | 38.6 | 5.85 | 1 | 1 | 1665.93  | 114  | 129  |     | 124  |
| (Q5ZPR3) CD276 antigen precursor (Costimulatory molecule) (B7 homolog 3) (B7-H3) (4lg-B7-H3)                                                                                                                                                         | CD276_HUMAN | 57216  | QLVHFSFAEGDQGSAYANR              | K | T | 95.00% | 0    | 0    | 8.72 | 2 | 1 | 2061.93  | 74   | 92   |     | 91   |
| (Q5ZPR3) CD276 antigen precursor (Costimulatory molecule) (B7 homolog 3) (B7-H3) (4lg-B7-H3)                                                                                                                                                         | CD276_HUMAN | 57216  | TALFPDLLAQGNASLR                 | R | L | 95.00% | 91.2 | 38.6 | 6.49 | 3 | 1 | 1687.90  | 93   | 108  |     | 104  |
| (Q5ZPR3) CD276 antigen precursor (Costimulatory molecule) (B7 homolog 3) (B7-H3) (4lg-B7-H3)                                                                                                                                                         | CD276_HUMAN | 57216  | VVLGANGTYSCLVR                   | R | N | 95.00% | 82.5 | 38.7 | 6.19 | 2 | 0 | 1509.77  | 210  | 223  |     | 215  |
| (Q6UVK1) Chondroitin sulfate proteoglycan 4 precursor (Chondroitin sulfate proteoglycan NG2) (Melanoma chondroitin sulfate proteoglycan) (Melanoma-associated chondroitin sulfate proteoglycan)                                                      | CSPG4_HUMAN | 250476 | LDPTVLDAGELANR                   | R | T | 95.00% | 104  | 38.8 | 5.85 | 5 | 0 | 1,484.76 | 2063 | 2076 |     | 2075 |

List of Glycopeptide Identified

|                                                                                                                                                                                                 |             |        |                               |   |   |        |      |      |      |   |   |         |      |      |      |
|-------------------------------------------------------------------------------------------------------------------------------------------------------------------------------------------------|-------------|--------|-------------------------------|---|---|--------|------|------|------|---|---|---------|------|------|------|
| [Q6UVK1] Chondroitin sulfate proteoglycan 4 precursor (Chondroitin sulfate proteoglycan NG2) (Melanoma chondroitin sulfate proteoglycan) (Melanoma-associated chondroitin sulfate proteoglycan) | CSPG4_HUMAN | 250476 | LGLTPEATNASLLGCMEDLSVNGQR     | R | R | 95.00% | 61.8 | 38   | 3.25 | 1 | 0 | 2664.25 | 340  | 364  | 348  |
| [Q6UVK1] Chondroitin sulfate proteoglycan 4 precursor (Chondroitin sulfate proteoglycan NG2) (Melanoma chondroitin sulfate proteoglycan) (Melanoma-associated chondroitin sulfate proteoglycan) | CSPG4_HUMAN | 250476 | AGQPATAFSQQLDLDGAVLYSHNGSLSPR | R | D | 95.00% | 84.6 | 39   | 6.89 | 0 | 1 | 3001.47 | 1180 | 1208 | 1202 |
| [Q8NCC3] 1-O-acylceramide synthase precursor (EC 2.3.1.-) (ACS) (Lysosomal phospholipase A2) (Lysophospholipase 3) (LPLA2) (LCAT-like lysophospholipase) (LLPL)                                 | LYPA3_HUMAN | 46641  | VFVQPTPTNYTLR                 | K | D | 95.00% | 67.8 | 38.6 | 3.35 | 1 | 0 | 1552.84 | 281  | 293  | 289  |
| [Q8NCC3] 1-O-acylceramide synthase precursor (EC 2.3.1.-) (ACS) (Lysosomal phospholipase A2) (Lysophospholipase 3) (LPLA2) (LCAT-like lysophospholipase) (LLPL)                                 | LYPA3_HUMAN | 46641  | QEHQVLLQELPGSEHIEMLANATTLAYLK | R | R | 95.00% | 0    | 0    | 4.7  | 0 | 2 | 3276.65 | 378  | 406  | 398  |
| [Q96AY3] FK506-binding protein 10 precursor (EC 5.2.1.8) (Peptidyl-prolyl cis-trans isomerase) (PPIase) (Rotamase) (65 kDa FK506-binding protein) (FKBP65) (Immunophilin FKBP65)                | FKB10_HUMAN | 64228  | YHYNGLTLDGTSFDTSYSK           | R | G | 95.00% | 67.1 | 38.4 | 5.01 | 1 | 0 | 2169.96 | 179  | 197  | 182  |
| [Q96HE7] ERO1-like protein alpha precursor (EC 1.8.4.-) (ERO1-Lalpha) (Oxidoreductin-1-Lalpha) (Endoplasmic oxidoreductin-1-like protein) (ERO1-L)                                              | ERO1A_HUMAN | 54377  | WGHNITEFQQR                   | K | F | 95.00% | 48.2 | 39.1 | 0    | 1 | 0 | 1416.67 | 277  | 287  | 280  |
| [Q9H3G5] Probable serine carboxypeptidase CPVL precursor (EC 3.4.16.-) (Carboxypeptidase, vitellogenic-like) (Vitellogenic carboxypeptidase-like protein) (VCP-like protein) (HVLP)             | CPVL_HUMAN  | 54148  | SYAGFLTYNK                    | K | T | 95.00% | 61.6 | 38.9 | 4.12 | 1 | 0 | 1100.56 | 73   | 82   | 81   |
| [Q9H3G5] Probable serine carboxypeptidase CPVL precursor (EC 3.4.16.-) (Carboxypeptidase, vitellogenic-like) (Vitellogenic carboxypeptidase-like protein) (VCP-like protein) (HVLP)             | CPVL_HUMAN  | 54148  | QAIHVGNTQFNDGTIVEK            | R | Y | 95.00% | 0    | 0    | 10.3 | 2 | 0 | 1954.95 | 340  | 357  | 346  |
| [Q9UBP4] Dickkopf-related protein 3 precursor (Dkk3) (Dickkopf-3) (hDkk-3)                                                                                                                      | DKK3_HUMAN  | 38272  | ITNNQTGMVFSETVITSVGDEEGR      | K | S | 95.00% | 130  | 38.5 | 3.33 | 0 | 1 | 2885.36 | 118  | 143  | 121  |
| [Q9UHL4] Dipeptidyl-peptidase 2 precursor (EC 3.4.14.2) (Dipeptidyl-peptidase II) (DPP II) (Dipeptidyl aminopeptidase II) (Quiescent cell proline dipeptidase) (Dipeptidyl peptidase 7)         | DPP2_HUMAN  | 54311  | ALAGLVYNASGSEHCYDIYR          | R | L | 95.00% | 117  | 38.5 | 7.59 | 1 | 0 | 2260.03 | 308  | 327  | 315  |
| [Q9Y4L1] 150 kDa oxygen-regulated protein precursor (Orp150) (Hypoxia up-regulated 1)                                                                                                           | HYOU1_HUMAN | 111319 | VFGSQLTTVK                    | R | L | 95.00% | 86.4 | 38.7 | 4.92 | 2 | 0 | 1194.64 | 510  | 520  | 515  |
| [Q9Y4L1] 150 kDa oxygen-regulated protein precursor (Orp150) (Hypoxia up-regulated 1)                                                                                                           | HYOU1_HUMAN | 111319 | VINETAWAK                     | K | N | 95.00% | 61.6 | 38.8 | 3.51 | 2 | 0 | 1147.58 | 860  | 868  | 862  |
| [Q9Y4L1] 150 kDa oxygen-regulated protein precursor (Orp150) (Hypoxia up-regulated 1)                                                                                                           | HYOU1_HUMAN | 111319 | AEPPLNASASDQGEK               | R | V | 95.00% | 53   | 39.4 | 1.35 | 1 | 0 | 1514.70 | 926  | 940  | 931  |
|                                                                                                                                                                                                 |             |        |                               |   |   |        |      |      |      |   |   |         |      |      |      |
|                                                                                                                                                                                                 |             |        |                               |   |   |        |      |      |      |   |   |         |      |      |      |
|                                                                                                                                                                                                 |             |        |                               |   |   |        |      |      |      |   |   |         |      |      |      |

# List of Glycopeptide Identified

## GlycoPeptide Identified in XTC-1 Cell Line

Experiment: XTC1-p13-p29-PNGF

Peak List Generator Version: BioWorks 3.3.1  
 Charge States Calculated: yes  
 Database Set: Database Name: the Sprot\_060206 database  
 Version: 06/26/06  
 Taxonomy: Homo sapiens  
 Number of Proteins: 14164  
 Search Engine Set: 2 Search Engines  
 Search Engine: Mascot; Version: 2.1.03  
 Fragment Tolerance: 0.80 Da (Monoisotopic)  
 Parent Tolerance: 1.6 Da (Monoisotopic)  
 Fixed Modifications: +57 on C (Carbamidomethyl)  
 Variable Modifications: +1 on N (Deamidation), +16 on M (Oxidation)  
 Database: the Sprot\_060206 database (selected for Homo sapiens, unknown version, 14164 entries)  
 Digestion Enzyme: Trypsin; Max Missed Cleavages: 2  
 Search Engine: X! Tandem; Version: 2007.01.01.1  
 Fragment Tolerance: 0.100 Da (Monoisotopic)  
 Parent Tolerance: 1.6 Da (Monoisotopic)  
 Fixed Modifications: +57 on C (Carbamidomethyl)  
 Variable Modifications: +1 on N (Deamidation), +16 on M (Oxidation)  
 Database: a subset of the uniprot\_sprot\_060206-oval database  
 Digestion Enzyme: Trypsin; Max Missed Cleavages: 2  
 Scaffold Version: Scaffold-2\_00\_00\_final

| Protein name                                                                                                                                                                                                                                       | Swiss-Prot Accession Name | Protein molecular weight (Da) | Peptide sequence                          | Previous amino acid | Next amino acid | Best Peptide identification probability | Best Mascot ion score | Best Mascot Identity score | Best XI Tandem - log(e) score | Number of identified +2H spectra | Number of identified +3H spectra | Calculated +1H Peptide Mass (AMU) | Peptide start index | Peptide stop index | N-linked Site | Potential N-linked site |
|----------------------------------------------------------------------------------------------------------------------------------------------------------------------------------------------------------------------------------------------------|---------------------------|-------------------------------|-------------------------------------------|---------------------|-----------------|-----------------------------------------|-----------------------|----------------------------|-------------------------------|----------------------------------|----------------------------------|-----------------------------------|---------------------|--------------------|---------------|-------------------------|
| (O00115) Deoxyribonuclease-2-alpha precursor (EC 3.1.22.1) (Deoxyribonuclease II alpha) (DNase II alpha) (Acid DNase) (Lysosomal DNase II) (R31240_2)                                                                                              | DNS2A_HUMAN               | 39563                         | SNTSQLAFLLYNDQPPPOPSK                     | R                   | A               | 95.00%                                  | 90.70                 | 38.70                      | 6.82                          | 2                                | 0                                | 2250.1                            | 85                  | 104                | 86            |                         |
| (O00115) Deoxyribonuclease-2-alpha precursor (EC 3.1.22.1) (Deoxyribonuclease II alpha) (DNase II alpha) (Acid DNase) (Lysosomal DNase II) (R31240_2)                                                                                              | DNS2A_HUMAN               | 39563                         | GHHVSOEPPWNSITLTSQAGAVFQSFSAK             | K                   | F               | 95.00%                                  | 97.00                 | 38.90                      | 10.60                         | 0                                | 4                                | 3015.5                            | 203                 | 230                | 212           |                         |
| (O00115) Deoxyribonuclease-2-alpha precursor (EC 3.1.22.1) (Deoxyribonuclease II alpha) (DNase II alpha) (Acid DNase) (Lysosomal DNase II) (R31240_2)                                                                                              | DNS2A_HUMAN               | 39563                         | TVGILPNSCSDIWLQVNLNVNQAIFPGPAGPSFNSTEDHSK | K                   | W               | 95.00%                                  | 169.00                | 37.80                      | 13.50                         | 0                                | 2                                | 4200.0                            | 259                 | 297                | 266, 290      |                         |
| (O00468) Agrin precursor                                                                                                                                                                                                                           | AGRN_HUMAN                | 214863                        | NELMLNSSLMR                               | K                   | I               | 95.00%                                  | 68.70                 | 38.70                      | 2.80                          | 1                                | 0                                | 1340.6                            | 130                 | 140                |               | 135                     |
| (O00468) Agrin precursor                                                                                                                                                                                                                           | AGRN_HUMAN                | 214863                        | GPTFAPLPPVAPLHCAQTPYGCCQDNITAAR           | R                   | G               | 95.00%                                  | 65.80                 | 38.20                      | 4.14                          | 0                                | 1                                | 3381.6                            | 752                 | 782                |               | 777                     |
| (O00754) Lysosomal alpha-mannosidase precursor (EC 3.2.1.24) (Mannosidase, alpha B) (Lysosomal acid alpha-mannosidase) (Laman) (Mannosidase alpha class 2B member 1) [Contains: Lysosomal alpha-mannosidase A peptide; Lysosomal alpha-mannosidase | MA2B1_HUMAN               | 113656                        | WWHQQTNAQTEVVR                            | R                   | D               | 95.00%                                  | 77.50                 | 39.00                      | 2.44                          | 0                                | 2                                | 1783.9                            | 126                 | 139                |               | 133                     |
| (O00754) Lysosomal alpha-mannosidase precursor (EC 3.2.1.24) (Mannosidase, alpha B) (Lysosomal acid alpha-mannosidase) (Laman) (Mannosidase alpha class 2B member 1) [Contains: Lysosomal alpha-mannosidase A peptide; Lysosomal alpha-mannosidase | MA2B1_HUMAN               | 113656                        | ANLWTSVK                                  | K                   | H               | 95.00%                                  | 41.10                 | 39.50                      | -0.57                         | 1                                | 0                                | 919.5                             | 365                 | 372                |               | 367                     |
| (O00754) Lysosomal alpha-mannosidase precursor (EC 3.2.1.24) (Mannosidase, alpha B) (Lysosomal acid alpha-mannosidase) (Laman) (Mannosidase alpha class 2B member 1) [Contains: Lysosomal alpha-mannosidase A peptide; Lysosomal alpha-mannosidase | MA2B1_HUMAN               | 113656                        | TPLVQEVHQNFSAWCSQVVR                      | K                   | L               | 95.00%                                  | 72.60                 | 38.10                      | 6.89                          | 2                                | 0                                | 2386.2                            | 682                 | 701                |               | 692                     |
| (O00754) Lysosomal alpha-mannosidase precursor (EC 3.2.1.24) (Mannosidase, alpha B) (Lysosomal acid alpha-mannosidase) (Laman) (Mannosidase alpha class 2B member 1) [Contains: Lysosomal alpha-mannosidase A peptide; Lysosomal alpha-mannosidase | MA2B1_HUMAN               | 113656                        | DYRPTWKLNOTEPVAGNYYPVNTR                  | R                   | I               | 95.00%                                  | 18.50                 | 38.50                      | 4.11                          | 0                                | 1                                | 2885.4                            | 757                 | 780                |               | 766                     |
| (O00754) Lysosomal alpha-mannosidase precursor (EC 3.2.1.24) (Mannosidase, alpha B) (Lysosomal acid alpha-mannosidase) (Laman) (Mannosidase alpha class 2B member 1) [Contains: Lysosomal alpha-mannosidase A peptide; Lysosomal alpha-mannosidase | MA2B1_HUMAN               | 113656                        | LNQTEPVAGNYYPVNTR                         | K                   | I               | 95.00%                                  | 85.10                 | 38.50                      | 7.14                          | 2                                | 0                                | 1936.9                            | 764                 | 780                |               | 766                     |
| (O14672) ADAM 10 precursor (EC 3.4.24.81) (A disintegrin and metalloproteinase domain 10) (Mammalian disintegrin-metalloprotease) (Kuzbanian protein homolog) (CDw156c antigen)                                                                    | ADA10_HUMAN               | 84125                         | INTTADEKDPNPFRR                           | R                   | F               | 95.00%                                  | 49.20                 | 39.10                      | 0.00                          | 1                                | 0                                | 1719.8                            | 277                 | 291                | 278           |                         |
| (O14773) Tripeptidyl-peptidase 1 precursor (EC 3.4.14.9) (Tripeptidyl-peptidase I) (TPP-I) (Tripeptidyl aminopeptidase) (Lysosomal pepstatin insensitive protease) (LPIC) (Growth-inhibiting gene 1 protein)                                       | TPP1_HUMAN                | 61230                         | YNLTSQDVGSGTSMNSQACAQFLEQYFHSDSLAQFMR     | R                   | L               | 95.00%                                  | 149.00                | 37.60                      | 8.74                          | 0                                | 2                                | 4248.8                            | 209                 | 245                |               | 210, 222                |
| (O14773) Tripeptidyl-peptidase 1 precursor (EC 3.4.14.9) (Tripeptidyl-peptidase I) (TPP-I) (Tripeptidyl aminopeptidase) (Lysosomal pepstatin insensitive protease) (LPIC) (Growth-inhibiting gene 1 protein)                                       | TPP1_HUMAN                | 61230                         | FLSSSPHLPSSYFNASGR                        | K                   | A               | 95.00%                                  | 69.50                 | 39.00                      | 3.62                          | 2                                | 1                                | 2052.0                            | 429                 | 447                | 443           |                         |

List of Glycopeptide Identified

|                                                                                                                                                                                                       |             |        |                             |   |   |        |        |       |       |   |   |        |      |      |          |
|-------------------------------------------------------------------------------------------------------------------------------------------------------------------------------------------------------|-------------|--------|-----------------------------|---|---|--------|--------|-------|-------|---|---|--------|------|------|----------|
| (O15031) Plexin-B2 precursor (MM1)                                                                                                                                                                    | PLXB2_HUMAN | 205081 | ALSNISLR                    | R | L | 86.60% | 40.50  | 39.30 | 0.00  | 1 | 0 | 874.5  | 124  | 131  | 127      |
| (O15031) Plexin-B2 precursor (MM1)                                                                                                                                                                    | PLXB2_HUMAN | 205081 | GGLNLTAVTVAENNHTVAFGLTSDGR  | R | I | 95.00% | 107.00 | 38.20 | 7.41  | 1 | 0 | 2687.3 | 388  | 414  | 391      |
| (O15031) Plexin-B2 precursor (MM1)                                                                                                                                                                    | PLXB2_HUMAN | 205081 | SCVAVTSAGPQNMSR             | K | R | 95.00% | 49.80  | 38.90 | 1.77  | 1 | 0 | 1652.7 | 517  | 531  | 528      |
| (O15031) Plexin-B2 precursor (MM1)                                                                                                                                                                    | PLXB2_HUMAN | 205081 | SINVTGGQFSLIQR              | R | F | 95.00% | 68.80  | 39.30 | 2.85  | 1 | 0 | 1520.8 | 1000 | 1013 | 1009     |
| (O15031) Plexin-B2 precursor (MM1)                                                                                                                                                                    | PLXB2_HUMAN | 205081 | TEAGAFEYVPPDTFENFTGGVK      | R | K | 95.00% | 32.20  | 38.60 | 3.17  | 1 | 0 | 2377.1 | 1084 | 1105 | 1099     |
| (O15118) Niemann-Pick C1 protein precursor                                                                                                                                                            | NPC1_HUMAN  | 142152 | VDNITDQFCNASVDPACVR         | R | C | 95.00% | 87.38  | 38.04 | 8.08  | 2 | 0 | 2282.4 | 959  | 978  | 968      |
| (O15118) Niemann-Pick C1 protein precursor                                                                                                                                                            | NPC1_HUMAN  | 142152 | DADACNATNWIYEMFNK           | K | D | 95.00% | 53.50  | 38.40 | 5.72  | 1 | 0 | 2079.8 | 180  | 196  | 185      |
| (O43852) Calumenin precursor (Crocalbin) (IEF SSP 9302)                                                                                                                                               | CALU_HUMAN  | 37090  | NATYGVLDDPDDDDGFFNYK        | K | Q | 95.00% | 105.00 | 38.10 | 7.00  | 2 | 0 | 2280.0 | 131  | 150  | 131      |
| (O75503) Ceroid-lipofuscinosis neuronal protein 5 (Protein CLN5)                                                                                                                                      | CLN5_HUMAN  | 46323  | IFLYSGEPTYLGNETSIVFGPTGNK   | R | T | 95.00% | 85.80  | 38.10 | 10.50 | 1 | 0 | 2593.2 | 259  | 282  | 281      |
| (O75629) CREG1 protein precursor (Cellular repressor of E1A-stimulated genes 1)                                                                                                                       | CREG1_HUMAN | 24057  | LNITNIWVLDYFGGPK            | K | I | 95.00% | 90.90  | 39.10 | 6.31  | 2 | 0 | 1851.0 | 192  | 207  | 193      |
| (O75882) Attractin precursor (Mahogany homolog) (DPPT-L)                                                                                                                                              | ATRNL_HUMAN | 158518 | IDSTGNVTNELR                | K | V | 95.00% | 84.30  | 38.70 | 5.43  | 1 | 0 | 1319.6 | 411  | 422  | 416      |
| (O75976) Carboxypeptidase D precursor (EC 3.4.17.22) (Metalloproteinase D) (gp180)                                                                                                                    | CBPD_HUMAN  | 152899 | LLNNTDVTYLLPSLNDPQFER       | R | A | 95.00% | 99.80  | 38.40 | 5.49  | 2 | 0 | 2278.2 | 170  | 189  | 182      |
| (O75976) Carboxypeptidase D precursor (EC 3.4.17.22) (Metalloproteinase D) (gp180)                                                                                                                    | CBPD_HUMAN  | 152899 | DSITSGLENATISVAGINHNTTGR    | K | F | 95.00% | 103.00 | 38.00 | 8.34  | 1 | 1 | 2600.3 | 390  | 415  | 399, 410 |
| (O75976) Carboxypeptidase D precursor (EC 3.4.17.22) (Metalloproteinase D) (gp180)                                                                                                                    | CBPD_HUMAN  | 152899 | FANEYPNITR                  | R | L | 95.00% | 58.70  | 38.60 | 2.37  | 2 | 0 | 1226.6 | 516  | 525  | 522      |
| (O75976) Carboxypeptidase D precursor (EC 3.4.17.22) (Metalloproteinase D) (gp180)                                                                                                                    | CBPD_HUMAN  | 152899 | GILNATISVAEINHPTVITYK       | R | T | 95.00% | 51.60  | 38.90 | 7.49  | 2 | 0 | 2142.1 | 808  | 827  | 811      |
| (O75976) Carboxypeptidase D precursor (EC 3.4.17.22) (Metalloproteinase D) (gp180)                                                                                                                    | CBPD_HUMAN  | 152899 | SEGAIQVNFLLVR               | K | S | 95.00% | 52.10  | 39.40 | 2.96  | 1 | 0 | 1434.8 | 860  | 872  | 867      |
| (O95274) Ly6/PLAUR domain-containing protein 3 precursor (GPI-anchored metastasis-associated protein C4.4A homolog) (Matrigel-induced gene C4 protein) (MG-C4)                                        | LYPD3_HUMAN | 35952  | GCFDGNVTLTAANVTVSLPVR       | K | G | 95.00% | 111.00 | 38.30 | 6.38  | 1 | 0 | 2193.1 | 171  | 191  | 176, 183 |
| (O95302) FK506-binding protein 9 precursor (EC 5.2.1.8) (Peptidyl-prolyl cis-trans isomerase) (PPlase) (Rotamase)                                                                                     | FKBP9_HUMAN | 63067  | YHYNGTLDDGLTDFDSSYSR        | R | N | 95.00% | 86.30  | 38.70 | 5.89  | 2 | 0 | 2210.0 | 283  | 301  | 286      |
| (P00533) Epidermal growth factor receptor precursor (EC 2.7.10.1) (Receptor tyrosine-protein kinase ErbB-1)                                                                                           | EGFR_HUMAN  | 134261 | DIVSSDFLSNMSMDFQNLHGLSCQK   | R | C | 95.00% | 44.40  | 37.70 | 3.74  | 1 | 0 | 2794.2 | 166  | 189  | 175      |
| (P00533) Epidermal growth factor receptor precursor (EC 2.7.10.1) (Receptor tyrosine-protein kinase ErbB-1)                                                                                           | EGFR_HUMAN  | 134261 | EFVENSECIQCHPECLPQAMNITCTGR | R | G | 95.00% | 70.80  | 38.20 | 5.80  | 0 | 1 | 3298.4 | 548  | 574  | 568      |
| (P00533) Epidermal growth factor receptor precursor (EC 2.7.10.1) (Receptor tyrosine-protein kinase ErbB-1)                                                                                           | EGFR_HUMAN  | 134261 | TCPAGVMEGENTLVWK            | K | Y | 95.00% | 41.80  | 39.00 | 1.62  | 1 | 0 | 1794.8 | 594  | 609  | 603      |
| (P01033) Metalloproteinase inhibitor 1 precursor (TIMP-1) (Erythroid potentiating activity) (EPA) (Tissue inhibitor of metalloproteinases) (Fibroblast collagenase inhibitor) (Collagenase inhibitor) | TIMP1_HUMAN | 23153  | FVGTPEVNTQTLTYQR            | K | Y | 95.00% | 104.00 | 39.00 | 8.09  | 2 | 0 | 1753.9 | 46   | 60   | 53       |
| (P01033) Metalloproteinase inhibitor 1 precursor (TIMP-1) (Erythroid potentiating activity) (EPA) (Tissue inhibitor of metalloproteinases) (Fibroblast collagenase inhibitor) (Collagenase inhibitor) | TIMP1_HUMAN | 23153  | SHNRSEEFLIAGK               | R | L | 95.00% | 59.20  | 38.70 | 0.25  | 1 | 0 | 1488.7 | 99   | 111  | 101      |
| (P02751) Fibronectin precursor (FN) (Cold-insoluble globulin) (CIG)                                                                                                                                   | FINC_HUMAN  | 262581 | DOCIVDDITYVNDTFHK           | R | R | 95.00% | 98.30  | 38.20 | 6.26  | 2 | 0 | 2198.0 | 516  | 533  | 528      |
| (P02751) Fibronectin precursor (FN) (Cold-insoluble globulin) (CIG)                                                                                                                                   | FINC_HUMAN  | 262581 | RHEEGHMLNCTCFGQGR           | K | G | 95.00% | 46.70  | 39.50 | 1.96  | 0 | 2 | 2105.9 | 534  | 550  | 542      |
| (P02751) Fibronectin precursor (FN) (Cold-insoluble globulin) (CIG)                                                                                                                                   | FINC_HUMAN  | 262581 | LDAPTNLQFVNETDSTVLR         | K | W | 95.00% | 51.00  | 38.20 | 2.92  | 1 | 0 | 2233.1 | 997  | 1016 | 1007     |
| (P02790) Hemopexin precursor (Beta-1B-glycoprotein)                                                                                                                                                   | HEMO_HUMAN  | 51659  | SWPAVGNCSALR                | R | W | 95.00% | 66.70  | 39.20 | 7.39  | 2 | 0 | 1405.7 | 181  | 193  | 187      |
| (P04062) Glucosylceramidase precursor (EC 3.2.1.45) (Beta-glucocerebrosidase) (Acid beta-glucosidase) (D-glucosyl-N-acylsphingosine glucosylhydrolase) (Alglucerase) (Imiglucerase)                   | GLCM_HUMAN  | 59700  | MELSMGPIQANHGTGTLTLPQEQK    | R | F | 95.00% | 71.10  | 37.90 | 7.70  | 1 | 1 | 2840.4 | 88   | 113  | 98       |
| (P04062) Glucosylceramidase precursor (EC 3.2.1.45) (Beta-glucocerebrosidase) (Acid beta-glucosidase) (D-glucosyl-N-acylsphingosine glucosylhydrolase) (Alglucerase) (Imiglucerase)                   | GLCM_HUMAN  | 59700  | TYTYADTPDDFQLHNFSLPEEDTK    | R | L | 95.00% | 76.90  | 37.80 | 4.49  | 1 | 1 | 2848.2 | 171  | 194  | 185      |
| (P04062) Glucosylceramidase precursor (EC 3.2.1.45) (Beta-glucocerebrosidase) (Acid beta-glucosidase) (D-glucosyl-N-acylsphingosine glucosylhydrolase) (Alglucerase) (Imiglucerase)                   | GLCM_HUMAN  | 59700  | DLGPTLANSTHHNVR             | R | L | 95.00% | 81.30  | 39.00 | 8.57  | 3 | 1 | 1632.8 | 302  | 316  | 309      |
| (P04216) Thy-1 membrane glycoprotein precursor (Thy-1 antigen) (CD90 antigen) (CDw90 antigen)                                                                                                         | THY1_HUMAN  | 17917  | LDCRHENTSSSPIQYFSLTR        | R | E | 95.00% | 85.10  | 38.50 | 7.15  | 4 | 4 | 2541.2 | 36   | 56   | 42       |
| (P04216) Thy-1 membrane glycoprotein precursor (Thy-1 antigen) (CD90 antigen) (CDw90 antigen)                                                                                                         | THY1_HUMAN  | 17917  | HENTSSSPIQYFSLTR            | R | E | 95.00% | 119.00 | 38.50 | 13.30 | 3 | 1 | 1996.9 | 40   | 56   | 42       |
| (P04216) Thy-1 membrane glycoprotein precursor (Thy-1 antigen) (CD90 antigen) (CDw90 antigen)                                                                                                         | THY1_HUMAN  | 17917  | DEGTYTCALHSHSGSPPISSQNVTVLR | K | D | 95.00% | 96.30  | 37.30 | 5.96  | 1 | 2 | 2964.4 | 98   | 124  | 119      |
| (P04233) HLA class II histocompatibility antigen gamma chain (HLA-DR antigens-associated invariant chain) (Ia antigen-associated invariant chain) (Ii) (p33) (CD74 antigen)                           | HG2A_HUMAN  | 33498  | YGNMTEHVMHLLQNADPLK         | K | V | 95.00% | 45.90  | 38.20 | 3.23  | 1 | 0 | 2359.1 | 134  | 153  | 136      |
| (P04233) HLA class II histocompatibility antigen gamma chain (HLA-DR antigens-associated invariant chain) (Ia antigen-associated invariant chain) (Ii) (p33) (CD74 antigen)                           | HG2A_HUMAN  | 33498  | GHHNCSESELEDDPSSGLGVTK      | R | Q | 95.00% | 55.90  | 38.80 | 8.19  | 0 | 2 | 2354.1 | 267  | 288  | 271      |
| (P05028) Sodium/potassium-transporting ATPase subunit beta-1 (Sodium/potassium-dependent ATPase beta-1 subunit)                                                                                       | AT1B1_HUMAN | 35045  | FKLEWLGNCSGLNDETYGYK        | R | E | 95.00% | 59.00  | 38.50 | 4.28  | 0 | 1 | 2395.1 | 151  | 170  | 158      |

List of Glycopeptide Identified

|                                                                                                                                                                                                                                                      |             |       |                          |   |   |        |        |       |       |   |   |        |     |     |          |     |
|------------------------------------------------------------------------------------------------------------------------------------------------------------------------------------------------------------------------------------------------------|-------------|-------|--------------------------|---|---|--------|--------|-------|-------|---|---|--------|-----|-----|----------|-----|
| (P05026) Sodium/potassium-transporting ATPase subunit beta-1 (Sodium/potassium-dependent ATPase beta-1 subunit)                                                                                                                                      | AT1B1_HUMAN | 35045 | LEWLGNCGLNDETYGK         | K | E | 95.00% | 77.10  | 38.60 | 5.89  | 1 | 0 | 2119.9 | 153 | 170 | 158      |     |
| (P05026) Sodium/potassium-transporting ATPase subunit beta-1 (Sodium/potassium-dependent ATPase beta-1 subunit)                                                                                                                                      | AT1B1_HUMAN | 35045 | YLOPLLAQVQFNLTMDTEIR     | K | I | 95.00% | 115.00 | 38.00 | 15.00 | 1 | 0 | 2383.2 | 254 | 273 | 265      |     |
| (P05362) Intercellular adhesion molecule 1 precursor (ICAM-1) (Major group rhinovirus receptor) (CD54 antigen)                                                                                                                                       | ICAM1_HUMAN | 57807 | VELAPLPWQPVGKNTLNR       | R | C | 95.00% | 49.80  | 39.00 | 3.77  | 2 | 0 | 2119.2 | 116 | 134 | 130      |     |
| (P05362) Intercellular adhesion molecule 1 precursor (ICAM-1) (Major group rhinovirus receptor) (CD54 antigen)                                                                                                                                       | ICAM1_HUMAN | 57807 | ANLTVLLR                 | R | G | 95.00% | 67.80  | 39.20 | 3.06  | 2 | 0 | 999.6  | 144 | 152 | 145      |     |
| (P05362) Intercellular adhesion molecule 1 precursor (ICAM-1) (Major group rhinovirus receptor) (CD54 antigen)                                                                                                                                       | ICAM1_HUMAN | 57807 | LNPTVYTGNDSSFAK          | R | A | 95.00% | 89.90  | 38.60 | 3.55  | 2 | 0 | 1614.8 | 259 | 273 | 267      |     |
| (P05362) Intercellular adhesion molecule 1 precursor (ICAM-1) (Major group rhinovirus receptor) (CD54 antigen)                                                                                                                                       | ICAM1_HUMAN | 57807 | SFSCSATLEVAGQLHKNQTR     | R | E | 95.00% | 68.00  | 38.40 | 5.38  | 1 | 0 | 2348.2 | 368 | 388 | 385      |     |
| (P05556) Integrin beta-1 precursor (Fibronectin receptor beta subunit) (Integrin VLA-4 beta subunit) (CD29 antigen)                                                                                                                                  | ITB1_HUMAN  | 88447 | CHEGNGTFECGACR           | K | C | 95.00% | 0.00   | 0.00  | 11.40 | 2 | 0 | 1638.6 | 477 | 490 | 481      |     |
| (P05556) Integrin beta-1 precursor (Fibronectin receptor beta subunit) (Integrin VLA-4 beta subunit) (CD29 antigen)                                                                                                                                  | ITB1_HUMAN  | 88447 | KDCTQCEQSYFNITK          | K | V | 95.00% | 94.10  | 38.80 | 5.96  | 2 | 0 | 1895.8 | 658 | 672 | 669      |     |
| (P05556) Integrin beta-1 precursor (Fibronectin receptor beta subunit) (Integrin VLA-4 beta subunit) (CD29 antigen)                                                                                                                                  | ITB1_HUMAN  | 88447 | DTCTQCEQSYFNITK          | K | V | 95.00% | 73.80  | 38.50 | 6.70  | 1 | 0 | 1767.7 | 659 | 672 | 669      |     |
| (P06276) Cholinesterase precursor (EC 3.1.1.8) (Acetylcholine acetylhydrolase) (Choline esterase II) (Butyrylcholine esterase) (Pseudocholinesterase)                                                                                                | CHLE_HUMAN  | 68402 | WSDIWNATK                | K | Y | 95.00% | 48.70  | 39.00 | 2.00  | 1 | 0 | 1121.5 | 80  | 88  | 85       |     |
| (P06276) Cholinesterase precursor (EC 3.1.1.8) (Acetylcholine acetylhydrolase) (Choline esterase II) (Butyrylcholine esterase) (Pseudocholinesterase)                                                                                                | CHLE_HUMAN  | 68402 | DNYTKAEILSR              | R | S | 95.00% | 69.60  | 39.30 | 2.92  | 1 | 0 | 1439.7 | 482 | 493 | 483      |     |
| (P06276) Cholinesterase precursor (EC 3.1.1.8) (Acetylcholine acetylhydrolase) (Choline esterase II) (Butyrylcholine esterase) (Pseudocholinesterase)                                                                                                | CHLE_HUMAN  | 68402 | YGNPNETQNNSTSWVPFK       | K | S | 95.00% | 85.40  | 39.00 | 8.04  | 2 | 0 | 2084.9 | 505 | 522 | 509, 514 |     |
| (P06280) Alpha-galactosidase A precursor (EC 3.2.1.22) (Melibiase) (Alpha-D-galactosidase galactohydrolase) (Alpha-D-galactosidase A) (Agalsidase alfa)                                                                                              | AGAL_HUMAN  | 48750 | HMSLALNR                 | K | T | 95.00% | 44.70  | 38.80 | 0.96  | 1 | 0 | 942.5  | 186 | 193 | 192      | 408 |
| (P06865) Beta-hexosaminidase alpha chain precursor (EC 3.2.1.52) (N-acetyl-beta-glucosaminidase) (Beta-N-acetylhexosaminidase) (Hexosaminidase A)                                                                                                    | HEXA_HUMAN  | 60672 | SAEGTFFINK               | K | T | 95.00% | 58.20  | 39.20 | 2.92  | 1 | 0 | 1114.5 | 149 | 158 | 157      |     |
| (P06865) Beta-hexosaminidase alpha chain precursor (EC 3.2.1.52) (N-acetyl-beta-glucosaminidase) (Beta-N-acetylhexosaminidase) (Hexosaminidase A)                                                                                                    | HEXA_HUMAN  | 60672 | SAEGTFFINKTEIEDFPR       | K | F | 95.00% | 91.30  | 38.20 | 7.74  | 2 | 0 | 2102.0 | 149 | 166 | 157      |     |
| (P07339) Cathepsin D precursor (EC 3.4.23.5) [Contains: Cathepsin D light chain; Cathepsin D heavy chain]                                                                                                                                            | CATD_HUMAN  | 44535 | YYKGLSLYLVNTR            | K | K | 95.00% | 69.90  | 38.50 | 5.74  | 2 | 0 | 1564.8 | 254 | 266 | 263      |     |
| (P07339) Cathepsin D precursor (EC 3.4.23.5) [Contains: Cathepsin D light chain; Cathepsin D heavy chain]                                                                                                                                            | CATD_HUMAN  | 44535 | GSLSYLVNTR               | K | K | 95.00% | 80.20  | 38.50 | 2.96  | 4 | 0 | 1110.6 | 257 | 266 | 263      |     |
| (P07602) Proactivator polypeptide precursor [Contains: Saposin A (Protein A); Saposin B-Val; Saposin B (Sphingolipid activator protein 1) (SAP-1) (Cerebroside sulfate activator) (CSAct) (Dispersin) (Sulfatide/GM1 activator); Saposin C (Co-beta- | SAP_HUMAN   | 58094 | DVVTAAGMDLKDNAMEEILVYLEK | K | T | 95.00% | 85.00  | 37.40 | 9.85  | 6 | 3 | 2767.4 | 68  | 92  | 80       |     |
| (P07602) Proactivator polypeptide precursor [Contains: Saposin A (Protein A); Saposin B-Val; Saposin B (Sphingolipid activator protein 1) (SAP-1) (Cerebroside sulfate activator) (CSAct) (Dispersin) (Sulfatide/GM1 activator); Saposin C (Co-beta- | SAP_HUMAN   | 58094 | DNATEEELVYLEK            | K | T | 95.00% | 89.50  | 38.90 | 2.24  | 2 | 0 | 1666.8 | 79  | 92  | 80       |     |
| (P07602) Proactivator polypeptide precursor [Contains: Saposin A (Protein A); Saposin B-Val; Saposin B (Sphingolipid activator protein 1) (SAP-1) (Cerebroside sulfate activator) (CSAct) (Dispersin) (Sulfatide/GM1 activator); Saposin C (Co-beta- | SAP_HUMAN   | 58094 | TCDWLKPKNMSASCK          | K | E | 95.00% | 40.70  | 38.50 | 2.89  | 1 | 0 | 1811.8 | 93  | 107 | 101      |     |
| (P07602) Proactivator polypeptide precursor [Contains: Saposin A (Protein A); Saposin B-Val; Saposin B (Sphingolipid activator protein 1) (SAP-1) (Cerebroside sulfate activator) (CSAct) (Dispersin) (Sulfatide/GM1 activator); Saposin C (Co-beta- | SAP_HUMAN   | 58094 | TNSTFVQALVEHVK           | R | E | 95.00% | 94.10  | 39.30 | 6.23  | 6 | 3 | 1573.8 | 214 | 227 | 215      |     |
| (P07602) Proactivator polypeptide precursor [Contains: Saposin A (Protein A); Saposin B-Val; Saposin B (Sphingolipid activator protein 1) (SAP-1) (Cerebroside sulfate activator) (CSAct) (Dispersin) (Sulfatide/GM1 activator); Saposin C (Co-beta- | SAP_HUMAN   | 58094 | LIDNNKTEKEILDADFCK       | K | M | 95.00% | 83.10  | 38.30 | 8.04  | 6 | 5 | 2007.0 | 328 | 344 | 332      |     |
| (P07602) Proactivator polypeptide precursor [Contains: Saposin A (Protein A); Saposin B-Val; Saposin B (Sphingolipid activator protein 1) (SAP-1) (Cerebroside sulfate activator) (CSAct) (Dispersin) (Sulfatide/GM1 activator); Saposin C (Co-beta- | SAP_HUMAN   | 58094 | NLEKNSTKQEILAALEK        | R | G | 95.00% | 124.00 | 38.40 | 5.70  | 6 | 7 | 1930.0 | 422 | 438 | 426      |     |

List of Glycopeptide Identified

|                                                                                                                                                                                                                                                      |            |        |                                     |   |   |        |        |       |       |   |   |        |      |      |          |
|------------------------------------------------------------------------------------------------------------------------------------------------------------------------------------------------------------------------------------------------------|------------|--------|-------------------------------------|---|---|--------|--------|-------|-------|---|---|--------|------|------|----------|
| (P07602) Proactivator polypeptide precursor [Contains: Saposin A (Protein A); Saposin B-Val; Saposin B (Sphingolipid activator protein 1) (SAP-1) (Cerebroside sulfate activator) (CSAct) (Dispersin) (Sulfatide/GM1 activator); Saposin C (Co-beta- | SAP_HUMAN  | 58094  | NSTKQEILAALEK                       | K | G | 95.00% | 69.80  | 39.20 | 3.57  | 1 | 0 | 1445.8 | 426  | 438  | 426      |
| (P07686) Beta-hexosaminidase beta chain precursor (EC 3.2.1.52) (N-acetyl-beta-glucosaminidase) (Beta-N-acetylhexosaminidase) (Hexosaminidase B) (Cervical cancer proto-oncogene 7) (HCC-7) [Contains: Beta-hexosaminidase beta-B chain; Beta-hexos  | HEXB_HUMAN | 63095  | MTPNLLHLAPENFYISHSPNSTAGPSTLLLEAFRR | K | Y | 95.00% | 120.00 | 37.50 | 5.80  | 0 | 2 | 4088.9 | 65   | 100  | 84       |
| (P07686) Beta-hexosaminidase beta chain precursor (EC 3.2.1.52) (N-acetyl-beta-glucosaminidase) (Beta-N-acetylhexosaminidase) (Hexosaminidase B) (Cervical cancer proto-oncogene 7) (HCC-7) [Contains: Beta-hexosaminidase beta-B chain; Beta-hexos  | HEXB_HUMAN | 63095  | LDSFGPINPLNTLNTYSFLTTFFK            | K | E | 95.00% | 69.80  | 37.80 | 5.03  | 1 | 0 | 2626.3 | 316  | 338  | 327      |
| (P07711) Cathepsin L precursor (EC 3.4.22.15) (Major excreted protein) (MEP) [Contains: Cathepsin L heavy chain; Cathepsin L light chain]                                                                                                            | CATL_HUMAN | 37546  | YSVANDTGFVDIPK                      | K | Q | 95.00% | 98.70  | 38.60 | 6.51  | 2 | 0 | 1526.7 | 217  | 230  | 221      |
| (P07711) Cathepsin L precursor (EC 3.4.22.15) (Major excreted protein) (MEP) [Contains: Cathepsin L heavy chain; Cathepsin L light chain]                                                                                                            | CATL_HUMAN | 37546  | YSVANDTGFVDIPKQEK                   | K | A | 95.00% | 84.20  | 38.80 | 3.09  | 2 | 2 | 1911.9 | 217  | 233  | 221      |
| (P07996) Thrombospondin-1 precursor                                                                                                                                                                                                                  | TSP1_HUMAN | 129394 | VVNSTTGGPEHLR                       | K | N | 95.00% | 54.20  | 38.60 | 2.47  | 1 | 0 | 1367.7 | 1065 | 1077 | 1067     |
| (P08174) Complement decay-accelerating factor precursor (CD55 antigen)                                                                                                                                                                               | DAF_HUMAN  | 41382  | DSVICLKGSQWSDIEEFCNR                | K | S | 95.00% | 44.80  | 38.80 | 2.37  | 0 | 1 | 2444.1 | 77   | 96   | 95       |
| (P08174) Complement decay-accelerating factor precursor (CD55 antigen)                                                                                                                                                                               | DAF_HUMAN  | 41382  | GSQWSDIEEFCNR                       | K | S | 95.00% | 73.80  | 38.80 | 4.51  | 1 | 0 | 1628.7 | 84   | 96   | 95       |
| (P08195) 4F2 cell-surface antigen heavy chain (4F2hc) (Lymphocyte activation antigen 4F2 large subunit) (4F2 heavy chain antigen) (CD98 antigen)                                                                                                     | 4F2_HUMAN  | 57929  | DASSFLAEWQNTK                       | K | G | 95.00% | 93.80  | 39.20 | 5.96  | 2 | 0 | 1610.8 | 254  | 267  | 264      |
| (P08195) 4F2 cell-surface antigen heavy chain (4F2hc) (Lymphocyte activation antigen 4F2 large subunit) (4F2 heavy chain antigen) (CD98 antigen)                                                                                                     | 4F2_HUMAN  | 57929  | LLIAGTNSDQLQILSLLESNK               | R | D | 95.00% | 72.50  | 39.50 | 1.16  | 0 | 1 | 2358.3 | 274  | 295  | 280      |
| (P08195) 4F2 cell-surface antigen heavy chain (4F2hc) (Lymphocyte activation antigen 4F2 large subunit) (4F2 heavy chain antigen) (CD98 antigen)                                                                                                     | 4F2_HUMAN  | 57929  | SLVTQYLNATGNR                       | K | W | 95.00% | 91.80  | 38.90 | 2.33  | 2 | 0 | 1437.7 | 316  | 328  | 323      |
| (P08571) Monocyte differentiation antigen CD14 precursor (Myeloid cell-specific leucine-rich glycoprotein) [Contains: Monocyte differentiation antigen CD14, urinary form; Monocyte differentiation antigen CD14, membrane-bound form]               | CD14_HUMAN | 40059  | LRNVSWATGR                          | R | S | 95.00% | 51.10  | 38.80 | 3.96  | 1 | 0 | 1160.6 | 149  | 158  | 151      |
| (P08582) Melanotransferrin precursor (Melanoma-associated antigen p97) (CD228 antigen)                                                                                                                                                               | TRFM_HUMAN | 80223  | DCDVLTVASEFFNASCVPVNNPK             | K | N | 95.00% | 104.00 | 37.80 | 9.09  | 2 | 0 | 2584.2 | 503  | 525  | 515      |
| (P08648) Integrin alpha-5 precursor (Fibronectin receptor alpha subunit) (Integrin alpha-F) (VLA-5) (CD49e antigen) [Contains: Integrin alpha-5 heavy chain; Integrin alpha-5 light chain]                                                           | ITA5_HUMAN | 114521 | TEKEPLSDPVGTCYLSTDNFTR              | R | I | 95.00% | 87.20  | 38.40 | 11.90 | 1 | 0 | 2531.2 | 164  | 185  | 182      |
| (P08648) Integrin alpha-5 precursor (Fibronectin receptor alpha subunit) (Integrin alpha-F) (VLA-5) (CD49e antigen) [Contains: Integrin alpha-5 heavy chain; Integrin alpha-5 light chain]                                                           | ITA5_HUMAN | 114521 | GNLTYGVYVILNGSDIR                   | K | S | 95.00% | 102.00 | 38.60 | 7.10  | 1 | 0 | 1857.9 | 296  | 312  | 297, 307 |
| (P08648) Integrin alpha-5 precursor (Fibronectin receptor alpha subunit) (Integrin alpha-F) (VLA-5) (CD49e antigen) [Contains: Integrin alpha-5 heavy chain; Integrin alpha-5 light chain]                                                           | ITA5_HUMAN | 114521 | NLNNSQSDVVSFR                       | K | L | 95.00% | 62.90  | 38.50 | 4.33  | 1 | 0 | 1480.7 | 771  | 783  | 773      |
| (P08962) CD63 antigen (Melanoma-associated antigen ME491) (Lysosome-associated membrane glycoprotein 3) (LAMP-3) (Ocular melanoma-associated antigen) (OMA81H) (Granulophysin) (Tetraspanin-30) (Tspan-30)                                           | CD63_HUMAN | 25487  | QQMENVPKNNHTASILDR                  | R | M | 95.00% | 53.70  | 38.60 | 4.17  | 1 | 0 | 2161.0 | 120  | 137  | 130      |
| (P08962) CD63 antigen (Melanoma-associated antigen ME491) (Lysosome-associated membrane glycoprotein 3) (LAMP-3) (Ocular melanoma-associated antigen) (OMA81H) (Granulophysin) (Tetraspanin-30) (Tspan-30)                                           | CD63_HUMAN | 25487  | NNHTASILDR                          | K | M | 95.00% | 42.90  | 38.90 | 2.07  | 1 | 0 | 1141.6 | 128  | 137  | 130      |
| (P08962) CD63 antigen (Melanoma-associated antigen ME491) (Lysosome-associated membrane glycoprotein 3) (LAMP-3) (Ocular melanoma-associated antigen) (OMA81H) (Granulophysin) (Tetraspanin-30) (Tspan-30)                                           | CD63_HUMAN | 25487  | CCGAANYTDWEK                        | K | I | 95.00% | 69.70  | 39.40 | 5.82  | 2 | 0 | 1475.6 | 144  | 155  | 150      |
| (P08962) CD63 antigen (Melanoma-associated antigen ME491) (Lysosome-associated membrane glycoprotein 3) (LAMP-3) (Ocular melanoma-associated antigen) (OMA81H) (Granulophysin) (Tetraspanin-30) (Tspan-30)                                           | CD63_HUMAN | 25487  | NRVPDSCCINVTVGCGINFNEK              | K | A | 95.00% | 88.00  | 38.10 | 10.30 | 2 | 0 | 2554.1 | 162  | 183  | 172      |
| (P08962) CD63 antigen (Melanoma-associated antigen ME491) (Lysosome-associated membrane glycoprotein 3) (LAMP-3) (Ocular melanoma-associated antigen) (OMA81H) (Granulophysin) (Tetraspanin-30) (Tspan-30)                                           | CD63_HUMAN | 25487  | VPDSCCINVTVGCGINFNEK                | R | A | 95.00% | 63.90  | 38.20 | 7.00  | 2 | 0 | 2284.0 | 164  | 183  | 172      |



List of Glycopeptide Identified

|                                                                                                                                                                                                                                                      |             |        |                             |   |   |        |        |       |       |    |   |        |      |      |          |
|------------------------------------------------------------------------------------------------------------------------------------------------------------------------------------------------------------------------------------------------------|-------------|--------|-----------------------------|---|---|--------|--------|-------|-------|----|---|--------|------|------|----------|
| (P11717) Cation-independent mannose-6-phosphate receptor precursor (CI Man-6-P receptor) (CI-MPR) (M6PR) (Insulin-like growth factor 2 receptor) (Insulin-like growth factor II receptor) (IGF-II receptor) (M6P/IGF2 receptor) (M6P/IGF2R) (300 kD) | MPRI_HUMAN  | 274256 | TNITLVCKPGDLESAPVLR         | K | T | 95.00% | 63.10  | 38.50 | 10.20 | 1  | 0 | 2084.1 | 580  | 598  | 581      |
| (P11717) Cation-independent mannose-6-phosphate receptor precursor (CI Man-6-P receptor) (CI-MPR) (M6PR) (Insulin-like growth factor 2 receptor) (Insulin-like growth factor II receptor) (IGF-II receptor) (M6P/IGF2 receptor) (M6P/IGF2R) (300 kD) | MPRI_HUMAN  | 274256 | DAGVGFPEYQEEDNSTYNFR        | R | W | 95.00% | 80.80  | 38.50 | 11.50 | 2  | 0 | 2339.0 | 734  | 753  | 747      |
| (P13284) Gamma-interferon-inducible lysosomal thiol reductase precursor (Gamma-interferon-inducible protein IP-30)                                                                                                                                   | GILT_HUMAN  | 29131  | SNAPLVNVTLYYEALCGGCR        | K | A | 95.00% | 146.00 | 38.10 | 9.17  | 1  | 0 | 2258.1 | 68   | 87   | 74       |
| (P13473) Lysosome-associated membrane glycoprotein 2 precursor (LAMP-2) (CD107b antigen)                                                                                                                                                             | LAMP2_HUMAN | 44943  | WQMNFTVR                    | K | Y | 95.00% | 47.20  | 38.60 | 3.41  | 1  | 0 | 1098.5 | 46   | 53   | 49       |
| (P13473) Lysosome-associated membrane glycoprotein 2 precursor (LAMP-2) (CD107b antigen)                                                                                                                                                             | LAMP2_HUMAN | 44943  | TVTISDHGTVTYNGSICGDDQNGPK   | K | I | 95.00% | 66.60  | 38.60 | 3.03  | 0  | 7 | 2638.2 | 63   | 87   | 75       |
| (P13473) Lysosome-associated membrane glycoprotein 2 precursor (LAMP-2) (CD107b antigen)                                                                                                                                                             | LAMP2_HUMAN | 44943  | IAVQFGPGFSWIANFTK           | K | A | 95.00% | 70.80  | 38.40 | 8.39  | 1  | 0 | 1884.0 | 88   | 104  | 101      |
| (P13473) Lysosome-associated membrane glycoprotein 2 precursor (LAMP-2) (CD107b antigen)                                                                                                                                                             | LAMP2_HUMAN | 44943  | VASVININPNTHTSTGSCR         | K | S | 95.00% | 114.00 | 38.30 | 4.64  | 2  | 2 | 2029.0 | 248  | 266  | 257      |
| (P13473) Lysosome-associated membrane glycoprotein 2 precursor (LAMP-2) (CD107b antigen)                                                                                                                                                             | LAMP2_HUMAN | 44943  | VQPFNVTOGK                  | R | Y | 95.00% | 39.30  | 39.00 | 4.92  | 1  | 0 | 1118.6 | 352  | 361  | 356      |
| (P13591) Neural cell adhesion molecule 1, 140 kDa isoform precursor (N-CAM 140) (NCAM-140) (CD56 antigen)                                                                                                                                            | NCAM1_HUMAN | 93343  | DGQLLPSSNYSNIK              | R | I | 95.00% | 78.60  | 38.90 | 6.00  | 2  | 0 | 1536.8 | 451  | 464  | 459      |
| (P13611) Versican core protein precursor (Large fibroblast proteoglycan) (Chondroitin sulfate proteoglycan core protein 2) (PG-M) (Glial hyaluronate-binding protein) (GHAP)                                                                         | CSPG2_HUMAN | 372795 | RGQFESVAPSQNFSDSSESDTHPFVIK | R | T | 95.00% | 67.00  | 38.30 | 4.41  | 0  | 1 | 3068.4 | 1431 | 1458 | 1442     |
| (P13674) Prolyl 4-hydroxylase alpha-1 subunit precursor (EC 1.14.11.2) (4-PH alpha-1) (Procollagen-proline,2-oxoglutarate-4-dioxygenase alpha-1 subunit)                                                                                             | P4HA1_HUMAN | 61034  | DMSDGFISNLTQR               | K | Q | 95.00% | 73.90  | 39.00 | 6.18  | 1  | 0 | 1613.7 | 105  | 118  | 113      |
| (P13987) CD59 glycoprotein precursor (Membrane attack complex inhibition factor) (MACIF) (MAC-inhibitory protein) (MAC-IP) (Protectin) (MEM43 antigen) (Membrane inhibitor of reactive lysis) (MIRL) (20 kDa homologous restriction factor) (HRF-20) | CD59_HUMAN  | 14159  | TAVNCSDFDACLITK             | K | A | 95.00% | 117.00 | 38.90 | 5.96  | 50 | 0 | 1802.8 | 40   | 55   | 43       |
| (P14314) Glucosidase 2 beta subunit precursor (Glucosidase II beta subunit) (Protein kinase C substrate, 60.1 kDa protein, heavy chain) (PKCSH) (80K-H protein)                                                                                      | GLU2B_HUMAN | 59279  | YEQGTGCWQGNR                | K | S | 95.00% | 50.50  | 39.40 | 1.34  | 1  | 0 | 1552.7 | 464  | 476  | 476      |
| (P14384) Carboxypeptidase M precursor (EC 3.4.17.12)                                                                                                                                                                                                 | CBPM_HUMAN  | 50497  | TVAQNYSSVTHLHSIGK           | K | S | 95.00% | 84.00  | 38.70 | 5.52  | 1  | 0 | 1842.9 | 34   | 50   | 38       |
| (P14384) Carboxypeptidase M precursor (EC 3.4.17.12)                                                                                                                                                                                                 | CBPM_HUMAN  | 50497  | ELLHLIDLVTSDGKDPETNLINSTR   | R | I | 95.00% | 64.10  | 38.30 | 4.15  | 0  | 1 | 3184.7 | 91   | 118  | 115      |
| (P14384) Carboxypeptidase M precursor (EC 3.4.17.12)                                                                                                                                                                                                 | CBPM_HUMAN  | 50497  | NFPDAFEYNNVSR               | R | Q | 95.00% | 57.00  | 38.80 | 5.34  | 2  | 0 | 1573.7 | 155  | 167  | 164      |
| (P15151) Poliovirus receptor precursor (Nectin-like protein 5) (Nect-5) (CD155 antigen)                                                                                                                                                              | PVR_HUMAN   | 45284  | VEDEGNVTCYLVTFPQGSR         | R | S | 95.00% | 71.30  | 38.60 | 3.80  | 1  | 0 | 2220.0 | 115  | 133  | 120      |
| (P15586) N-acetylglucosamine-6-sulfatase precursor (EC 3.1.6.14) (G6S) (Glucosamine-6-sulfatase)                                                                                                                                                     | GNS_HUMAN   | 62066  | YPHNHHVVNNTLEGNCSSK         | K | S | 95.00% | 81.60  | 38.20 | 5.05  | 1  | 2 | 2209.0 | 103  | 121  | 111, 117 |
| (P15586) N-acetylglucosamine-6-sulfatase precursor (EC 3.1.6.14) (G6S) (Glucosamine-6-sulfatase)                                                                                                                                                     | GNS_HUMAN   | 62066  | YYNYTLSINGK                 | K | A | 95.00% | 72.50  | 38.60 | 7.74  | 2  | 0 | 1337.6 | 181  | 191  | 183      |
| (P15586) N-acetylglucosamine-6-sulfatase precursor (EC 3.1.6.14) (G6S) (Glucosamine-6-sulfatase)                                                                                                                                                     | GNS_HUMAN   | 62066  | TPMNTNSIQFLDNAFR            | K | K | 95.00% | 124.00 | 38.60 | 8.77  | 10 | 3 | 1843.9 | 275  | 290  | 279      |
| (P15586) N-acetylglucosamine-6-sulfatase precursor (EC 3.1.6.14) (G6S) (Glucosamine-6-sulfatase)                                                                                                                                                     | GNS_HUMAN   | 62066  | MLVANIDLGPITLDIAGYDLNK      | K | T | 95.00% | 111.00 | 38.00 | 14.20 | 2  | 0 | 2376.2 | 367  | 388  | 387      |
| (P15586) N-acetylglucosamine-6-sulfatase precursor (EC 3.1.6.14) (G6S) (Glucosamine-6-sulfatase)                                                                                                                                                     | GNS_HUMAN   | 62066  | GASNLTWR                    | R | S | 95.00% | 54.90  | 39.00 | 2.35  | 3  | 0 | 905.4  | 402  | 409  | 405      |
| (P15848) Arylsulfatase B precursor (EC 3.1.6.12) (ASB) (N-acetylgalactosamine-4-sulfatase) (G4S)                                                                                                                                                     | ARSB_HUMAN  | 59671  | CTLIDALNVTR                 | R | C | 95.00% | 46.20  | 39.40 | 4.28  | 1  | 0 | 1276.7 | 181  | 191  | 188      |
| (P15848) Arylsulfatase B precursor (EC 3.1.6.12) (ASB) (N-acetylgalactosamine-4-sulfatase) (G4S)                                                                                                                                                     | ARSB_HUMAN  | 59671  | GHTNGTKPLDGFVVVK            | R | T | 75.90% | 38.60  | 38.50 | 0.00  | 1  | 0 | 1772.9 | 363  | 378  | 366      |
| (P16070) CD44 antigen precursor (Phagocytic glycoprotein I) (PGP-1) (HUTCH-I) (Extracellular matrix receptor-III) (ECMR-III) (GP90 lymphocyte homing/adhesion receptor) (Hermes antigen) (Hyaluronate receptor) (Heparan sulfate proteoglycan) (Epi) | CD44_HUMAN  | 81535  | AFNSTLPTMAQMEK              | K | A | 95.00% | 76.90  | 39.20 | 4.85  | 4  | 0 | 1601.7 | 55   | 68   | 57       |
| (P16278) Beta-galactosidase precursor (EC 3.2.1.23) (Lactase) (Acid beta-galactosidase)                                                                                                                                                              | BGAL_HUMAN  | 76076  | NNVITLNIITGK                | R | A | 95.00% | 67.70  | 38.90 | 3.74  | 2  | 0 | 1188.6 | 458  | 468  | 464      |
| (P16870) Carboxypeptidase E precursor (EC 3.4.17.10) (CPE) (Carboxypeptidase H) (CPH) (Enkephalin convertase) (Prohormone-processing carboxypeptidase)                                                                                               | CBPE_HUMAN  | 53134  | DLQGNPIANATISVIGIDHDVTSK    | R | D | 95.00% | 92.20  | 37.70 | 8.32  | 2  | 0 | 2566.3 | 382  | 406  | 390      |
| (P17050) Alpha-N-acetylgalactosaminidase precursor (EC 3.2.1.49) (Alpha-galactosidase B)                                                                                                                                                             | NAGAB_HUMAN | 46548  | LGIYADMGNFCTMGYPGTTLDK      | K | V | 95.00% | 86.50  | 38.50 | 7.49  | 2  | 0 | 2442.1 | 116  | 137  | 124      |



List of Glycopeptide Identified

|                                                                                                                                                                                                                                                    |             |        |                                    |   |   |        |       |       |      |   |   |        |      |      |     |      |
|----------------------------------------------------------------------------------------------------------------------------------------------------------------------------------------------------------------------------------------------------|-------------|--------|------------------------------------|---|---|--------|-------|-------|------|---|---|--------|------|------|-----|------|
| (P17050) Alpha-N-acetylgalactosaminidase precursor (EC 3.2.1.49) (Alpha-galactosidase B)                                                                                                                                                           | NAGAB_HUMAN | 46548  | VNYSLLADICNLWR                     | R | N | 95.00% | 67.90 | 38.70 | 3.51 | 1 | 0 | 1737.9 | 200  | 213  |     | 201  |
| (P17301) Integrin alpha-2 precursor (Platelet membrane glycoprotein Ia) (GPIa) (Collagen receptor) (VLA-2 alpha chain) (CD49b antigen)                                                                                                             | ITA2_HUMAN  | 129280 | TNMSLGLILTR                        | K | N | 95.00% | 63.30 | 39.00 | 2.89 | 2 | 0 | 1235.7 | 111  | 121  |     | 112  |
| (P17301) Integrin alpha-2 precursor (Platelet membrane glycoprotein Ia) (GPIa) (Collagen receptor) (VLA-2 alpha chain) (CD49b antigen)                                                                                                             | ITA2_HUMAN  | 129280 | YFFNVSDAAALLEK                     | R | A | 95.00% | 92.60 | 38.70 | 5.42 | 2 | 0 | 1646.8 | 340  | 353  | 343 |      |
| (P17405) Sphingomyelin phosphodiesterase precursor (EC 3.1.4.12) (Acid sphingomyelinase) (aSMase)                                                                                                                                                  | ASM_HUMAN   | 69835  | VYQIDGNYSR                         | R | S | 95.00% | 45.90 | 39.10 | 0.00 | 1 | 0 | 1215.6 | 497  | 506  |     | 503  |
| (P17900) Ganglioside GM2 activator precursor (GM2-AP) (Cerebroside sulfate activator protein) (Shingolipid activator protein 3) (SAP-3) [Contains: Ganglioside GM2 activator isoform short]                                                        | SAP3_HUMAN  | 20805  | SLTLEPDPVIVPGNVTLVSVVGSTVPLSSPLK   | R | V | 95.00% | 82.80 | 36.70 | 8.96 | 1 | 0 | 3203.8 | 50   | 81   | 63  |      |
| (P17936) Insulin-like growth factor-binding protein 3 precursor (IGFBP-3) (IBP-3) (IGF-binding protein 3)                                                                                                                                          | IBP3_HUMAN  | 31642  | GLCVNASAVSR                        | R | L | 95.00% | 66.70 | 39.00 | 3.77 | 1 | 0 | 1134.6 | 112  | 122  | 116 |      |
| (P19022) Neural-cadherin precursor (N-cadherin) (Cadherin-2) (CDw325 antigen)                                                                                                                                                                      | CADH2_HUMAN | 99836  | IVSQAPSTPSPNMFITNNETGDIITVAAGLDREK | R | V | 95.00% | 73.70 | 38.30 | 4.82 | 0 | 1 | 3605.8 | 308  | 341  |     | 325  |
| (P19022) Neural-cadherin precursor (N-cadherin) (Cadherin-2) (CDw325 antigen)                                                                                                                                                                      | CADH2_HUMAN | 99836  | VDIIVANLTVTKDQPHTPAWNAVYR          | R | I | 95.00% | 66.70 | 38.90 | 6.05 | 0 | 1 | 2938.5 | 396  | 421  |     | 402  |
| (P19440) Gamma-glutamyltranspeptidase 1 precursor (EC 2.3.2.2) (Gamma-glutamyltransferase 1) (CD224 antigen) [Contains: Gamma-glutamyltranspeptidase 1 heavy chain; Gamma-glutamyltranspeptidase 1 light chain]                                    | GGT1_HUMAN  | 61393  | LHNQLLPNVTTVER                     | R | N | 95.00% | 46.50 | 39.60 | 3.38 | 0 | 1 | 1634.9 | 504  | 517  | 511 |      |
| (P21589) 5'-nucleotidase precursor (EC 3.1.3.5) (Ecto-5'-nucleotidase) (5'-NT) (CD73 antigen)                                                                                                                                                      | 5NTD_HUMAN  | 63351  | GNVISSHGNPILLNSSIPEDPSIK           | R | A | 95.00% | 64.30 | 38.40 | 5.02 | 2 | 0 | 2489.3 | 298  | 321  |     | 311  |
| (P21589) 5'-nucleotidase precursor (EC 3.1.3.5) (Ecto-5'-nucleotidase) (5'-NT) (CD73 antigen)                                                                                                                                                      | 5NTD_HUMAN  | 63351  | IKLDNYSTQELGK                      | R | T | 95.00% | 72.50 | 39.00 | 4.85 | 1 | 0 | 1509.8 | 329  | 341  |     | 333  |
| (P23470) Receptor-type tyrosine-protein phosphatase gamma precursor (EC 3.1.3.48) (Protein-tyrosine phosphatase gamma) (R-PTP-gamma)                                                                                                               | PTPRG_HUMAN | 162042 | VGEEYQELQLDGFNNESSNK               | R | T | 95.00% | 59.00 | 38.60 | 7.42 | 1 | 0 | 2303.0 | 95   | 114  | 113 | 109  |
| (P23470) Receptor-type tyrosine-protein phosphatase gamma precursor (EC 3.1.3.48) (Protein-tyrosine phosphatase gamma) (R-PTP-gamma)                                                                                                               | PTPRG_HUMAN | 162042 | SDFSQTMFLQANTTR                    | R | I | 95.00% | 79.40 | 39.00 | 6.20 | 1 | 0 | 1763.8 | 433  | 447  | 444 |      |
| (P24821) Tenascin precursor (TN) (Hexabrachion) (Cytotactin) (Neuronectin) (GMEM) (JI) (Miotendinous antigen) (Glioma-associated-extracellular matrix antigen) (GP 150-225) (Tenascin C) (TN-C)                                                    | TENA_HUMAN  | 240845 | QSGVNATLPEENQPVFNHVYNIK            | R | L | 95.00% | 0.00  | 0.00  | 5.37 | 1 | 0 | 2681.3 | 34   | 57   |     | 38   |
| (P24821) Tenascin precursor (TN) (Hexabrachion) (Cytotactin) (Neuronectin) (GMEM) (JI) (Miotendinous antigen) (Glioma-associated-extracellular matrix antigen) (GP 150-225) (Tenascin C) (TN-C)                                                    | TENA_HUMAN  | 240845 | LNYSPLTQGWVGVQLPR                  | R | N | 95.00% | 65.60 | 38.40 | 4.96 | 2 | 0 | 1929.0 | 1017 | 1033 |     | 1018 |
| (P24821) Tenascin precursor (TN) (Hexabrachion) (Cytotactin) (Neuronectin) (GMEM) (JI) (Miotendinous antigen) (Glioma-associated-extracellular matrix antigen) (GP 150-225) (Tenascin C) (TN-C)                                                    | TENA_HUMAN  | 240845 | VEAAQNLTLPGLSLR                    | K | A | 95.00% | 72.60 | 38.80 | 1.34 | 1 | 0 | 1469.8 | 1387 | 1400 |     | 1392 |
| (P24821) Tenascin precursor (TN) (Hexabrachion) (Cytotactin) (Neuronectin) (GMEM) (JI) (Miotendinous antigen) (Glioma-associated-extracellular matrix antigen) (GP 150-225) (Tenascin C) (TN-C)                                                    | TENA_HUMAN  | 240845 | LLETVEYNISGAER                     | R | T | 95.00% | 95.20 | 39.20 | 4.80 | 2 | 0 | 1594.8 | 1478 | 1491 |     | 1485 |
| (P26006) Integrin alpha-3 precursor (Galactoprotein B3) (GAPB3) (VLA-3 alpha chain) (FRP-2) (CD49c antigen) [Contains: Integrin alpha-3 heavy chain; Integrin alpha-3 light chain]                                                                 | ITA3_HUMAN  | 118682 | ELAVPDGYTNR                        | R | T | 95.00% | 46.90 | 38.70 | 1.85 | 1 | 0 | 1235.6 | 77   | 87   |     | 86   |
| (P26006) Integrin alpha-3 precursor (Galactoprotein B3) (GAPB3) (VLA-3 alpha chain) (FRP-2) (CD49c antigen) [Contains: Integrin alpha-3 heavy chain; Integrin alpha-3 light chain]                                                                 | ITA3_HUMAN  | 118682 | NITIVTGAPR                         | K | H | 95.00% | 69.90 | 38.80 | 3.36 | 2 | 0 | 1042.6 | 265  | 274  |     | 265  |
| (P26006) Integrin alpha-3 precursor (Galactoprotein B3) (GAPB3) (VLA-3 alpha chain) (FRP-2) (CD49c antigen) [Contains: Integrin alpha-3 heavy chain; Integrin alpha-3 light chain]                                                                 | ITA3_HUMAN  | 118682 | SLDAYPILNQAQALENHTVEQFQK           | R | E | 95.00% | 74.80 | 38.10 | 4.00 | 1 | 0 | 2758.4 | 590  | 613  |     | 605  |
| (P27487) Dipeptidyl peptidase 4 (EC 3.4.14.5) (Dipeptidyl peptidase IV) (DPP IV) (T-cell activation antigen CD26) (TP103) (Adenosine deaminase complexing protein 2) (ADABP) [Contains: Dipeptidyl peptidase 4 membrane form (Dipeptidyl peptidase | DPP4_HUMAN  | 88263  | QLITEERIPNNTQWVWTWSPVGHK           | R | L | 95.00% | 0.00  | 0.00  | 6.70 | 0 | 1 | 2717.4 | 141  | 163  | 150 |      |
| (P27487) Dipeptidyl peptidase 4 (EC 3.4.14.5) (Dipeptidyl peptidase IV) (DPP IV) (T-cell activation antigen CD26) (TP103) (Adenosine deaminase complexing protein 2) (ADABP) [Contains: Dipeptidyl peptidase 4 membrane form (Dipeptidyl peptidase | DPP4_HUMAN  | 88263  | IPNNTQWVWTWSPVGHK                  | R | L | 95.00% | 85.20 | 38.40 | 6.05 | 1 | 0 | 1864.9 | 148  | 163  | 150 |      |

List of Glycopeptide Identified

|                                                                                                                                                                                                                                                      |             |        |                                    |   |   |        |        |       |       |   |   |        |     |     |     |
|------------------------------------------------------------------------------------------------------------------------------------------------------------------------------------------------------------------------------------------------------|-------------|--------|------------------------------------|---|---|--------|--------|-------|-------|---|---|--------|-----|-----|-----|
| (P27487) Dipeptidyl peptidase 4 (EC 3.4.14.5) (Dipeptidyl peptidase IV) (DPP IV) (T-cell activation antigen CD26) (TP103) (Adenosine deaminase complexing protein 2) (ADABP) [Contains: Dipeptidyl peptidase 4 membrane form (Dipeptidyl peptidase   | DPP4_HUMAN  | 88263  | IQNSVMDICDYDESSGR                  | R | W | 95.00% | 107.00 | 38.60 | 10.70 | 1 | 0 | 2168.9 | 319 | 336 | 321 |
| (P27487) Dipeptidyl peptidase 4 (EC 3.4.14.5) (Dipeptidyl peptidase IV) (DPP IV) (T-cell activation antigen CD26) (TP103) (Adenosine deaminase complexing protein 2) (ADABP) [Contains: Dipeptidyl peptidase 4 membrane form (Dipeptidyl peptidase   | DPP4_HUMAN  | 88263  | KLDFIILNETK                        | K | F | 95.00% | 84.80  | 39.00 | 2.70  | 2 | 0 | 1334.8 | 513 | 523 | 520 |
| (P28799) Granulins precursor (Proepithelin) (PEPI) [Contains: Acrogranin; Paragranulin; Granulin-1 (Granulin G); Granulin-2 (Granulin F); Granulin-3 (Granulin B); Granulin-4 (Granulin A); Granulin-5 (Granulin C); Granulin-6 (Granulin D); Granul | GRN_HUMAN   | 63522  | YGCCPMPNATCCSDHLHCCPQDTVCDLIQSK    | K | C | 95.00% | 80.50  | 37.80 | 4.35  | 0 | 1 | 3801.5 | 229 | 259 | 236 |
| (P28799) Granulins precursor (Proepithelin) (PEPI) [Contains: Acrogranin; Paragranulin; Granulin-1 (Granulin G); Granulin-2 (Granulin F); Granulin-3 (Granulin B); Granulin-4 (Granulin A); Granulin-5 (Granulin C); Granulin-6 (Granulin D); Granul | GRN_HUMAN   | 63522  | CLSKENATDLLTK                      | K | L | 95.00% | 43.90  | 39.20 | 1.02  | 1 | 0 | 1594.8 | 260 | 273 | 265 |
| (P28799) Granulins precursor (Proepithelin) (PEPI) [Contains: Acrogranin; Paragranulin; Granulin-1 (Granulin G); Granulin-2 (Granulin F); Granulin-3 (Granulin B); Granulin-4 (Granulin A); Granulin-5 (Granulin C); Granulin-6 (Granulin D); Granul | GRN_HUMAN   | 63522  | ENATDLLTK                          | K | L | 95.00% | 45.50  | 39.40 | 2.10  | 2 | 0 | 1106.6 | 264 | 273 | 265 |
| (P28799) Granulins precursor (Proepithelin) (PEPI) [Contains: Acrogranin; Paragranulin; Granulin-1 (Granulin G); Granulin-2 (Granulin F); Granulin-3 (Granulin B); Granulin-4 (Granulin A); Granulin-5 (Granulin C); Granulin-6 (Granulin D); Granul | GRN_HUMAN   | 63522  | DVECEGEGHFCHDNQTCR                 | K | D | 95.00% | 51.80  | 38.20 | 3.80  | 1 | 0 | 2281.8 | 518 | 535 | 530 |
| (P29323) Ephrin type-B receptor 2 precursor (EC 2.7.10.1) (Tyrosine-protein kinase receptor EPH-3) (DRT) (Receptor protein-tyrosine kinase HEK5) (ERK) (NY-REN-47 antigen)                                                                           | EPHB2_HUMAN | 117476 | AGFEAVENGTVCR                      | K | G | 95.00% | 53.90  | 39.20 | 3.18  | 1 | 0 | 1410.6 | 258 | 270 | 265 |
| (P30447) HLA class I histocompatibility antigen, A-23 alpha chain precursor (MHC class I antigen A*23) (A-9)                                                                                                                                         | 1A23_HUMAN  | 40714  | YYNQSEAGSHLQMMFGCDVGSDDR           | R | F | 95.00% | 71.30  | 38.90 | 7.10  | 0 | 2 | 2843.1 | 108 | 132 | 110 |
| (P30481) HLA class I histocompatibility antigen, B*44 alpha chain precursor (MHC class I antigen B*44) (Bw-44)                                                                                                                                       | 1B44_HUMAN  | 40463  | YYNQSEAGSHIQR                      | R | M | 95.00% | 82.80  | 38.80 | 5.92  | 1 | 0 | 1666.8 | 108 | 121 | 110 |
| (P30533) Alpha-2-macroglobulin receptor-associated protein precursor (Alpha-2-MRAP) (Low density lipoprotein receptor-related protein-associated protein 1) (RAP)                                                                                    | AMRP_HUMAN  | 41450  | VIDLWDLAQSANLTKDELAFFREELK         | R | H | 95.00% | 61.70  | 38.30 | 3.82  | 0 | 2 | 3047.6 | 257 | 282 | 268 |
| (P32004) Neural cell adhesion molecule L1 precursor (N-CAM L1) (CD171 antigen)                                                                                                                                                                       | L1CAM_HUMAN | 139985 | LLFPTNSSSHLVALQQGPLVLEICIEAGFPPTPK | R | W | 95.00% | 63.80  | 38.50 | 7.51  | 0 | 1 | 3678.9 | 242 | 275 | 247 |
| (P32970) Tumor necrosis factor ligand superfamily member 7 (CD27 ligand) (CD27-L) (CD70 antigen)                                                                                                                                                     | CD70_HUMAN  | 21100  | GDTLCTNLGTLLPSR                    | R | N | 95.00% | 80.20  | 38.60 | 3.02  | 2 | 0 | 1719.9 | 164 | 179 | 170 |
| (P34059) N-acetylgalactosamine-6-sulfatase precursor (EC 3.1.6.4) (N-acetylgalactosamine-6-sulfate sulfatase) (Galactose-6-sulfate sulfatase) (GalNAc6S sulfatase) (Chondroitinsulfatase) (Chondroitinase)                                           | GALNS_HUMAN | 58009  | TGEANLTIQIYLQEALDFIKR              | K | Q | 95.00% | 60.30  | 39.00 | 2.64  | 0 | 1 | 2324.2 | 200 | 219 | 204 |
| (P34059) N-acetylgalactosamine-6-sulfatase precursor (EC 3.1.6.4) (N-acetylgalactosamine-6-sulfate sulfatase) (Galactose-6-sulfate sulfatase) (GalNAc6S sulfatase) (Chondroitinsulfatase) (Chondroitinase)                                           | GALNS_HUMAN | 58009  | QQIDFCPGQNVSVTTHNLEDHTK            | R | L | 95.00% | 0.00   | 0.00  | 4.17  | 1 | 0 | 2639.2 | 414 | 437 | 423 |
| (P35052) Glypican-1 precursor                                                                                                                                                                                                                        | GPC1_HUMAN  | 61633  | ICPGQYCTCTSEMEENLANR               | R | S | 95.00% | 75.60  | 37.90 | 2.64  | 1 | 0 | 2450.0 | 61  | 80  | 79  |
| (P35052) Glypican-1 precursor                                                                                                                                                                                                                        | GPC1_HUMAN  | 61633  | SFDHFQHLNLSER                      | R | T | 95.00% | 50.30  | 38.90 | 4.92  | 2 | 0 | 1860.8 | 106 | 120 | 116 |
| (P35555) Fibrillin-1 precursor                                                                                                                                                                                                                       | FBN1_HUMAN  | 312283 | VLPVNVTDYQQLVR                     | R | Y | 95.00% | 53.50  | 39.20 | 4.72  | 1 | 0 | 1676.9 | 444 | 457 | 448 |
| (P35613) Basigin precursor (Leukocyte activation antigen M6) (Collagenase stimulatory factor) (Extracellular matrix metalloproteinase inducer) (EMMPRIN) (5F7) (Tumor cell-derived collagenase stimulatory factor) (TCSF) (OK blood group antigen)   | BASI_HUMAN  | 42182  | ILLTCSLNSDATEVTGHR                 | K | W | 95.00% | 143.00 | 38.20 | 5.89  | 2 | 2 | 1988.0 | 153 | 170 | 160 |
| (P41222) Prostaglandin-H2 D-isomerase precursor (EC 5.3.99.2) (Lipocalin-type prostaglandin-D synthase) (Glutathione-independent PGD synthetase) (Prostaglandin-D2 synthase) (PGD2 synthase) (PGDS2) (PGDS) (Beta-trace protein) (Cerebrin-28)       | PTGDS_HUMAN | 21011  | WFSAGLASNSSWLR                     | R | E | 95.00% | 76.30  | 38.60 | 5.32  | 1 | 0 | 1582.8 | 43  | 56  | 51  |
| (P41222) Prostaglandin-H2 D-isomerase precursor (EC 5.3.99.2) (Lipocalin-type prostaglandin-D synthase) (Glutathione-independent PGD synthetase) (Prostaglandin-D2 synthase) (PGD2 synthase) (PGDS2) (PGDS) (Beta-trace protein) (Cerebrin-28)       | PTGDS_HUMAN | 21011  | SVVAPATDGGNLNTSTFLR                | K | K | 95.00% | 147.00 | 38.30 | 14.10 | 2 | 0 | 1920.0 | 67  | 85  | 78  |
| (P43251) Biotinidase precursor (EC 3.5.1.12)                                                                                                                                                                                                         | BTD_HUMAN   | 58896  | NPVGLIGAEANTGETDPHSHK              | K | F | 95.00% | 61.10  | 38.90 | 2.80  | 0 | 1 | 2095.0 | 320 | 340 | 329 |
| (P43308) Transferrin-associated protein beta subunit precursor (TRAP-beta) (Signal sequence receptor beta subunit) (SSR-beta)                                                                                                                        | SSRB_HUMAN  | 20118  | IAPASNVSHVTVLRPLK                  | R | A | 95.00% | 84.10  | 38.60 | 3.72  | 2 | 0 | 1803.0 | 83  | 99  | 88  |
| (P48307) Tissue factor pathway inhibitor 2 precursor (TFPI-2) (Placental protein 5) (PP5)                                                                                                                                                            | TFPI2_HUMAN | 26917  | YFFNLSMTCEK                        | K | F | 95.00% | 43.20  | 38.80 | 3.37  | 1 | 0 | 1543.6 | 113 | 124 | 116 |

List of Glycopeptide Identified

|                                                                                                                                                                                                                                                     |             |        |                                    |   |   |        |        |       |      |   |   |        |     |     |     |          |
|-----------------------------------------------------------------------------------------------------------------------------------------------------------------------------------------------------------------------------------------------------|-------------|--------|------------------------------------|---|---|--------|--------|-------|------|---|---|--------|-----|-----|-----|----------|
| (P48307) Tissue factor pathway inhibitor 2 precursor (TFPI-2) (Placental protein 5) (PP5)                                                                                                                                                           | TFPI2_HUMAN | 26917  | KIPSFYSPKDEGLCSANVTR               | K | Y | 95.00% | 50.50  | 38.70 | 3.22 | 0 | 1 | 2430.1 | 153 | 173 |     | 170      |
| (P48307) Tissue factor pathway inhibitor 2 precursor (TFPI-2) (Placental protein 5) (PP5)                                                                                                                                                           | TFPI2_HUMAN | 26917  | DEGLCSANVTR                        | K | Y | 95.00% | 48.30  | 39.20 | 6.52 | 2 | 0 | 1222.5 | 163 | 173 |     | 170      |
| (P48960) CD97 antigen precursor (Leukocyte antigen CD97)                                                                                                                                                                                            | CD97_HUMAN  | 91852  | WCPQNSSCVNATACR                    | R | C | 95.00% | 73.40  | 38.50 | 6.89 | 1 | 0 | 1811.7 | 29  | 43  |     | 33, 38   |
| (P50895) Lutheran blood group glycoprotein precursor (B-CAM cell surface glycoprotein) (Auberger B antigen) (F8/G253 antigen)                                                                                                                       | LU_HUMAN    | 67386  | VLSLPLNSSAVVNCVHGLPTPALR           | K | W | 95.00% | 59.90  | 37.70 | 9.70 | 2 | 0 | 2603.4 | 371 | 395 |     | 377, 383 |
| (P50895) Lutheran blood group glycoprotein precursor (B-CAM cell surface glycoprotein) (Auberger B antigen) (F8/G253 antigen)                                                                                                                       | LU_HUMAN    | 67386  | TQNFLLVGGSPELK                     | R | T | 95.00% | 72.20  | 39.00 | 5.66 | 1 | 0 | 1675.9 | 437 | 451 | 439 |          |
| (P50897) Palmitoyl-protein thioesterase 1 precursor (EC 3.1.2.22) (Palmitoyl-protein hydrolase 1)                                                                                                                                                   | PPT1_HUMAN  | 34176  | LVQAEYWHDPKEDVYRNHSIFLADINQER      | R | G | 95.00% | 61.20  | 37.80 | 5.29 | 0 | 1 | 3700.8 | 180 | 209 |     | 197      |
| (P50897) Palmitoyl-protein thioesterase 1 precursor (EC 3.1.2.22) (Palmitoyl-protein hydrolase 1)                                                                                                                                                   | PPT1_HUMAN  | 34176  | NHSIFLADINQER                      | R | G | 95.00% | 51.00  | 39.30 | 6.40 | 1 | 0 | 1557.8 | 197 | 209 |     | 197      |
| (P50897) Palmitoyl-protein thioesterase 1 precursor (EC 3.1.2.22) (Palmitoyl-protein hydrolase 1)                                                                                                                                                   | PPT1_HUMAN  | 34176  | FLNDSIVDPVDSWFGFYR                 | K | S | 95.00% | 117.00 | 38.10 | 9.80 | 3 | 0 | 2307.1 | 230 | 248 | 232 |          |
| (P51688) N-sulphoglucosamine sulphohydrolase precursor (EC 3.10.1.1) (Sulfooglucosamine sulfamidase) (Sulphamidase)                                                                                                                                 | SPHM_HUMAN  | 56678  | NALLLLADDGGFSGAYNNSAIATPHLDALAR    | R | R | 95.00% | 172.00 | 38.40 | 9.24 | 0 | 1 | 3272.6 | 24  | 55  | 41  |          |
| (P51688) N-sulphoglucosamine sulphohydrolase precursor (EC 3.10.1.1) (Sulfooglucosamine sulfamidase) (Sulphamidase)                                                                                                                                 | SPHM_HUMAN  | 56678  | DAGVLNDTLVIFTSNDGIPFPSSGR          | R | T | 95.00% | 72.20  | 38.00 | 4.31 | 1 | 0 | 2507.2 | 259 | 282 | 264 |          |
| (P51688) N-sulphoglucosamine sulphohydrolase precursor (EC 3.10.1.1) (Sulfooglucosamine sulfamidase) (Sulphamidase)                                                                                                                                 | SPHM_HUMAN  | 56678  | MPFPIDQDFVYSPTFDQLLNR              | K | T | 95.00% | 37.30  | 38.00 | 4.70 | 1 | 0 | 2560.2 | 394 | 414 |     | 413      |
| (P53634) Dipeptidyl-peptidase 1 precursor (EC 3.4.14.1) (Dipeptidyl-peptidase I) (DPP-I) (DPPI) (Cathepsin C) (Cathepsin J) (Dipeptidyl transferase) [Contains: Dipeptidyl-peptidase 1 exclusion domain chain (Dipeptidyl-peptidase 1 exclusion dom | CATC_HUMAN  | 51824  | DVNCVSMGQPEK                       | R | K | 95.00% | 66.40  | 39.20 | 3.66 | 1 | 0 | 1380.6 | 51  | 62  | 53  |          |
| (P53634) Dipeptidyl-peptidase 1 precursor (EC 3.4.14.1) (Dipeptidyl-peptidase I) (DPP-I) (DPPI) (Cathepsin C) (Cathepsin J) (Dipeptidyl transferase) [Contains: Dipeptidyl-peptidase 1 exclusion domain chain (Dipeptidyl-peptidase 1 exclusion dom | CATC_HUMAN  | 51824  | VTTYCNETMTGWVHDVLR                 | K | N | 95.00% | 76.60  | 38.10 | 5.24 | 1 | 0 | 2256.0 | 114 | 132 | 119 |          |
| (P53634) Dipeptidyl-peptidase 1 precursor (EC 3.4.14.1) (Dipeptidyl-peptidase I) (DPP-I) (DPPI) (Cathepsin C) (Cathepsin J) (Dipeptidyl transferase) [Contains: Dipeptidyl-peptidase 1 exclusion domain chain (Dipeptidyl-peptidase 1 exclusion dom | CATC_HUMAN  | 51824  | ILTNSQTPILSPQEVVSCSYAQCGEGFPYLIAGK | R | Y | 95.00% | 0.00   | 0.00  | 4.41 | 0 | 1 | 4028.9 | 273 | 309 | 276 |          |
| (P55285) Cadherin-6 precursor (Kidney-cadherin) (K cadherin)                                                                                                                                                                                        | CADH6_HUMAN | 88293  | EDAQINTTIGSVTAQDPDAAR              | R | N | 95.00% | 82.10  | 38.20 | 3.68 | 2 | 0 | 2174.0 | 394 | 414 | 399 |          |
| (P55285) Cadherin-6 precursor (Kidney-cadherin) (K cadherin)                                                                                                                                                                                        | CADH6_HUMAN | 88293  | IFNIDSGNGSIFTSK                    | R | L | 95.00% | 83.50  | 39.10 | 3.21 | 2 | 0 | 1600.8 | 430 | 444 |     | 437      |
| (P56159) GDNF family receptor alpha-1 precursor (GFR-alpha-1) (GDNF receptor alpha) (GDNFR-alpha) (TGF-beta-related neurotrophic factor receptor 1) (RET ligand 1)                                                                                  | GFRA1_HUMAN | 51439  | ETNFSLASGLEAK                      | K | D | 95.00% | 72.70  | 38.90 | 1.89 | 2 | 0 | 1367.7 | 57  | 69  |     | 59       |
| (P61916) Epididymal secretory protein E1 precursor (Niemann-Pick disease type C2 protein) (hE1)                                                                                                                                                     | NPC2_HUMAN  | 16552  | DCGSVDGVKIEVNVSPCPTQPQLSK          | K | G | 95.00% | 81.00  | 38.30 | 4.62 | 0 | 2 | 2875.3 | 26  | 51  |     | 38       |
| (P61916) Epididymal secretory protein E1 precursor (Niemann-Pick disease type C2 protein) (hE1)                                                                                                                                                     | NPC2_HUMAN  | 16552  | EVNVSPCPTQPQLSK                    | K | G | 95.00% | 42.00  | 38.60 | 1.48 | 1 | 0 | 1843.9 | 36  | 51  |     | 38       |
| (P61916) Epididymal secretory protein E1 precursor (Niemann-Pick disease type C2 protein) (hE1)                                                                                                                                                     | NPC2_HUMAN  | 16552  | GQSYSVNVFTFSNIQSK                  | K | S | 95.00% | 83.90  | 39.00 | 4.13 | 2 | 0 | 1860.9 | 52  | 68  |     | 58       |
| (P80188) Neutrophil gelatinase-associated lipocalin precursor (NGAL) (p25) (25 kDa alpha-2-microglobulin-related subunit of MMP-9) (Lipocalin-2) (Oncogene 24p3)                                                                                    | NGAL_HUMAN  | 22571  | EDKSYNVTSVLFR                      | K | K | 95.00% | 39.70  | 38.80 | 4.15 | 1 | 0 | 1558.8 | 80  | 92  | 85  |          |
| (P80188) Neutrophil gelatinase-associated lipocalin precursor (NGAL) (p25) (25 kDa alpha-2-microglobulin-related subunit of MMP-9) (Lipocalin-2) (Oncogene 24p3)                                                                                    | NGAL_HUMAN  | 22571  | SYNVTSVLFR                         | K | K | 95.00% | 56.50  | 38.80 | 6.29 | 1 | 0 | 1186.6 | 83  | 92  | 85  |          |
| (Q02083) N-acyl ethanolamine-hydrolyzing acid amidase precursor (EC 3.5.1.-) (N-acyl sphingosine amidohydrolase-like) (ASAH-like protein) (Acid ceramidase-like protein)                                                                            | NAAA_HUMAN  | 40015  | FNVSLDSVPELR                       | R | W | 95.00% | 70.30  | 39.40 | 4.77 | 2 | 0 | 1376.7 | 36  | 47  |     | 37       |
| (Q02809) Procollagen-lysine,2-oxoglutarate 5-dioxygenase 1 precursor (EC 1.14.11.4) (Lysyl hydroxylase 1) (LH1)                                                                                                                                     | PLOD1_HUMAN | 83535  | FLGSGGFYGYAPNLSK                   | R | L | 95.00% | 47.90  | 38.90 | 2.46 | 1 | 0 | 1627.8 | 151 | 166 |     | 163      |
| (Q02809) Procollagen-lysine,2-oxoglutarate 5-dioxygenase 1 precursor (EC 1.14.11.4) (Lysyl hydroxylase 1) (LH1)                                                                                                                                     | PLOD1_HUMAN | 83535  | EQINITLDHR                         | R | C | 95.00% | 48.80  | 39.10 | 4.00 | 1 | 0 | 1239.6 | 194 | 203 |     | 197      |
| (Q05707) Collagen alpha-1(XIV) chain precursor (Lundulin)                                                                                                                                                                                           | COE1_HUMAN  | 193468 | AIIQGLMPDQNYTVQIIAYNK              | K | D | 95.00% | 62.40  | 38.50 | 7.21 | 2 | 0 | 2410.2 | 84  | 104 |     | 94       |
| (Q06481) Amyloid-like protein 2 precursor (Amyloid protein homolog) (APPH) (CDEI box-binding protein) (CDEBP)                                                                                                                                       | APLP2_HUMAN | 86937  | RNQSLSLLYK                         | R | V | 95.00% | 47.70  | 39.20 | 1.47 | 1 | 0 | 1222.7 | 540 | 549 |     | 541      |
| (Q07954) Low-density lipoprotein receptor-related protein 1 precursor (LRP) (Alpha-2-macroglobulin receptor) (A2MR) (Apolipoprotein E receptor) (APOER) (CD91 antigen)                                                                              | LRP1_HUMAN  | 504543 | VNRFNSTEYQVTR                      | R | V | 95.00% | 43.30  | 39.00 | 4.59 | 1 | 0 | 1713.9 | 442 | 455 | 446 |          |

List of Glycopeptide Identified

|                                                                                                                                                                                                                                      |             |        |                             |   |   |        |        |       |       |   |   |        |      |      |        |     |
|--------------------------------------------------------------------------------------------------------------------------------------------------------------------------------------------------------------------------------------|-------------|--------|-----------------------------|---|---|--------|--------|-------|-------|---|---|--------|------|------|--------|-----|
| (Q07954) Low-density lipoprotein receptor-related protein 1 precursor (LRP) (Alpha-2-macroglobulin receptor) (A2MR) (Apolipoprotein E receptor) (APOER) (CD91 antigen)                                                               | LRP1_HUMAN  | 504543 | FNSTEYQVTR                  | R | V | 95.00% | 86.70  | 38.80 | 8.29  | 1 | 0 | 1344.6 | 445  | 455  | 446    |     |
| (Q07954) Low-density lipoprotein receptor-related protein 1 precursor (LRP) (Alpha-2-macroglobulin receptor) (A2MR) (Apolipoprotein E receptor) (APOER) (CD91 antigen)                                                               | LRP1_HUMAN  | 504543 | LTSCATNASICGDEAR            | K | C | 87.80% | 41.10  | 39.10 | 0.00  | 1 | 0 | 1726.7 | 3782 | 3797 | 3788   |     |
| (Q08380) Galectin-3-binding protein precursor (Lectin galactoside-binding soluble 3-binding protein) (Mac-2-binding protein) (Mac-2 BP) (MAC2BP) (Tumor-associated antigen 90K)                                                      | LG3BP_HUMAN | 65314  | ALGFENATQALGR               | R | A | 95.00% | 83.80  | 38.90 | 5.43  | 2 | 0 | 1348.7 | 64   | 76   | 69     |     |
| (Q08380) Galectin-3-binding protein precursor (Lectin galactoside-binding soluble 3-binding protein) (Mac-2-binding protein) (Mac-2 BP) (MAC2BP) (Tumor-associated antigen 90K)                                                      | LG3BP_HUMAN | 65314  | EPGSNVITMSVDAECVPMVR        | K | D | 95.00% | 94.20  | 38.30 | 4.40  | 2 | 2 | 2110.9 | 188  | 206  | 192    |     |
| (Q08380) Galectin-3-binding protein precursor (Lectin galactoside-binding soluble 3-binding protein) (Mac-2-binding protein) (Mac-2 BP) (MAC2BP) (Tumor-associated antigen 90K)                                                      | LG3BP_HUMAN | 65314  | YKGLNLTEDTYKPR              | R | I | 95.00% | 77.50  | 39.00 | 5.89  | 1 | 0 | 1698.9 | 394  | 407  | 398    |     |
| (Q08380) Galectin-3-binding protein precursor (Lectin galactoside-binding soluble 3-binding protein) (Mac-2-binding protein) (Mac-2 BP) (MAC2BP) (Tumor-associated antigen 90K)                                                      | LG3BP_HUMAN | 65314  | GLNLTEDTYKPR                | K | I | 95.00% | 88.70  | 38.70 | 3.47  | 2 | 0 | 1407.7 | 396  | 407  | 398    |     |
| (Q08380) Galectin-3-binding protein precursor (Lectin galactoside-binding soluble 3-binding protein) (Mac-2-binding protein) (Mac-2 BP) (MAC2BP) (Tumor-associated antigen 90K)                                                      | LG3BP_HUMAN | 65314  | AAIPSALDTNSSK               | K | S | 95.00% | 86.40  | 39.40 | 5.46  | 2 | 0 | 1275.6 | 542  | 554  | 551    |     |
| (Q08380) Galectin-3-binding protein precursor (Lectin galactoside-binding soluble 3-binding protein) (Mac-2-binding protein) (Mac-2 BP) (MAC2BP) (Tumor-associated antigen 90K)                                                      | LG3BP_HUMAN | 65314  | TVIRPFYLTNSSGVD             | R | - | 95.00% | 72.70  | 39.20 | 4.10  | 1 | 0 | 1669.8 | 571  | 585  | 580    |     |
| (Q10588) ADP-ribosyl cyclase 2 precursor (EC 3.2.2.5) (Cyclic ADP-ribose hydrolase 2) (cADPr hydrolase 2) (Bone marrow stromal antigen 1) (BST-1) (CD157 antigen)                                                                    | BST1_HUMAN  | 35721  | NKNCTAIWEAFK                | R | V | 95.00% | 55.00  | 38.60 | 4.42  | 1 | 0 | 1482.7 | 64   | 75   | 66     |     |
| (Q10588) ADP-ribosyl cyclase 2 precursor (EC 3.2.2.5) (Cyclic ADP-ribose hydrolase 2) (cADPr hydrolase 2) (Bone marrow stromal antigen 1) (BST-1) (CD157 antigen)                                                                    | BST1_HUMAN  | 35721  | VALDKDPCSVLPDSYDLFLNLSR     | K | H | 95.00% | 67.20  | 38.40 | 6.02  | 1 | 2 | 2638.3 | 76   | 98   | 95     |     |
| (Q10588) ADP-ribosyl cyclase 2 precursor (EC 3.2.2.5) (Cyclic ADP-ribose hydrolase 2) (cADPr hydrolase 2) (Bone marrow stromal antigen 1) (BST-1) (CD157 antigen)                                                                    | BST1_HUMAN  | 35721  | DSSGVHVMVLMNGSEPTGAYPIK     | K | G | 95.00% | 65.20  | 38.10 | 5.89  | 1 | 0 | 2289.1 | 182  | 203  | 192    |     |
| (Q10589) Bone marrow stromal antigen 2 (BST-2) (CD317 antigen)                                                                                                                                                                       | BST2_HUMAN  | 19751  | NVTHLLQQLTEAQK              | R | G | 95.00% | 71.70  | 38.50 | 6.68  | 1 | 0 | 1752.9 | 65   | 79   | 65     |     |
| (Q10589) Bone marrow stromal antigen 2 (BST-2) (CD317 antigen)                                                                                                                                                                       | BST2_HUMAN  | 19751  | GFQDVEAAQAACNHTVMALMASLDAEK | K | A | 95.00% | 81.90  | 38.40 | 5.92  | 0 | 1 | 2941.3 | 80   | 106  | 92     |     |
| (Q13308) Tyrosine-protein kinase-like 7 precursor (Colon carcinoma kinase 4) (CCK-4)                                                                                                                                                 | PTK7_HUMAN  | 118243 | DGTPLSDDGQSNHVTSSK          | R | E | 95.00% | 49.80  | 39.10 | 3.82  | 1 | 0 | 1730.8 | 165  | 181  | 646    | 175 |
| (Q13449) Limbic system-associated membrane protein precursor (LSAMP)                                                                                                                                                                 | LSAMP_HUMAN | 37290  | LGVTNALSVLFRPGSVR           | K | G | 95.00% | 74.00  | 39.00 | 2.74  | 0 | 1 | 1787.0 | 296  | 312  | 300    |     |
| (Q13510) Acid ceramidase precursor (EC 3.5.1.23) (Acylsphingosine deacylase) (N-acylsphingosine amidohydrolase) (AC) (Putative 32 kDa heart protein) (PHP32) [Contains: Acid ceramidase alpha subunit; Acid ceramidase beta subunit] | ASAH1_HUMAN | 44633  | TVLENSTSYEEAK               | R | N | 95.00% | 80.40  | 38.70 | 2.18  | 2 | 0 | 1471.7 | 255  | 267  | 259    |     |
| (Q13510) Acid ceramidase precursor (EC 3.5.1.23) (Acylsphingosine deacylase) (N-acylsphingosine amidohydrolase) (AC) (Putative 32 kDa heart protein) (PHP32) [Contains: Acid ceramidase alpha subunit; Acid ceramidase beta subunit] | ASAH1_HUMAN | 44633  | TVLENSTSYEEAKNLLTK          | R | T | 95.00% | 87.00  | 38.50 | 3.89  | 1 | 0 | 2041.0 | 255  | 272  | 259    |     |
| (Q13510) Acid ceramidase precursor (EC 3.5.1.23) (Acylsphingosine deacylase) (N-acylsphingosine amidohydrolase) (AC) (Putative 32 kDa heart protein) (PHP32) [Contains: Acid ceramidase alpha subunit; Acid ceramidase beta subunit] | ASAH1_HUMAN | 44633  | ILAPAYFILGGNQSGETCVTR       | K | D | 95.00% | 104.00 | 38.00 | 11.90 | 1 | 0 | 2337.2 | 275  | 296  | 286    |     |
| (Q13641) Trophoblast glycoprotein precursor (5T4 oncofetal trophoblast glycoprotein) (5T4 oncotrophoblast glycoprotein) (5T4 oncofetal antigen) (M6P1)                                                                               | TPBG_HUMAN  | 46015  | NLTEVPTDLPAYVR              | R | N | 95.00% | 48.00  | 38.80 | 4.59  | 1 | 0 | 1588.8 | 81   | 94   | 81     |     |
| (Q13641) Trophoblast glycoprotein precursor (5T4 oncofetal trophoblast glycoprotein) (5T4 oncotrophoblast glycoprotein) (5T4 oncofetal antigen) (M6P1)                                                                               | TPBG_HUMAN  | 46015  | RPPLAELAALNLSGSR            | R | L | 95.00% | 63.70  | 39.10 | 4.49  | 2 | 0 | 1665.9 | 114  | 129  | 124    |     |
| (Q13740) CD166 antigen precursor (Activated leukocyte-cell adhesion molecule) (ALCAM)                                                                                                                                                | CD166_HUMAN | 65116  | NLNSYNTLSISNAR              | R | I | 95.00% | 62.50  | 38.50 | 3.92  | 1 | 0 | 1695.9 | 90   | 104  | 91, 95 |     |
| (Q13740) CD166 antigen precursor (Activated leukocyte-cell adhesion molecule) (ALCAM)                                                                                                                                                | CD166_HUMAN | 65116  | LGDCISEDYDPDGNITWYR         | K | N | 95.00% | 98.80  | 38.10 | 3.19  | 2 | 0 | 2262.0 | 154  | 172  | 167    |     |
| (Q13740) CD166 antigen precursor (Activated leukocyte-cell adhesion molecule) (ALCAM)                                                                                                                                                | CD166_HUMAN | 65116  | NAIKEGDNITLK                | K | C | 95.00% | 51.10  | 38.90 | 2.62  | 1 | 0 | 1316.7 | 258  | 269  | 265    |     |
| (Q13740) CD166 antigen precursor (Activated leukocyte-cell adhesion molecule) (ALCAM)                                                                                                                                                | CD166_HUMAN | 65116  | NATVVMWKDNIR                | R | L | 95.00% | 54.00  | 39.20 | 3.57  | 1 | 0 | 1463.7 | 361  | 372  | 361    |     |
| (Q13740) CD166 antigen precursor (Activated leukocyte-cell adhesion molecule) (ALCAM)                                                                                                                                                | CD166_HUMAN | 65116  | IIISPEENVTLTCTAENQLER       | K | T | 95.00% | 95.70  | 38.50 | 11.20 | 2 | 0 | 2431.2 | 473  | 493  | 480    |     |
| (Q13740) CD166 antigen precursor (Activated leukocyte-cell adhesion molecule) (ALCAM)                                                                                                                                                | CD166_HUMAN | 65116  | TVNSLNVSAISIPHEADEISDENR    | R | E | 95.00% | 66.70  | 38.30 | 5.48  | 0 | 1 | 2857.3 | 494  | 519  | 499    |     |
| (Q14126) Desmoglein-2 precursor (HDGC)                                                                                                                                                                                               | DSG2_HUMAN  | 122367 | INATDADEPNTLNSK             | K | I | 95.00% | 80.30  | 39.00 | 2.49  | 1 | 0 | 1603.7 | 180  | 194  | 182    |     |

List of Glycopeptide Identified

|                                                                                                                                                                                                                  |             |        |                                          |   |   |        |        |       |       |   |   |        |     |     |    |          |
|------------------------------------------------------------------------------------------------------------------------------------------------------------------------------------------------------------------|-------------|--------|------------------------------------------|---|---|--------|--------|-------|-------|---|---|--------|-----|-----|----|----------|
| (Q14508) WAP four-disulfide core domain protein 2 precursor (Major epididymis-specific protein E4) (Epididymal secretory protein E4) (Putative protease inhibitor WAP5)                                          | WFDC2_HUMAN | 12974  | TGVCPELQADONCTQECVSDSECADNLK             | K | C | 95.00% | 96.00  | 36.90 | 7.57  | 1 | 1 | 3229.3 | 33  | 60  | 44 |          |
| (Q14956) Transmembrane glycoprotein NMB precursor (Transmembrane glycoprotein HGFIN)                                                                                                                             | GPNMB_HUMAN | 63905  | VSVNTANVTLGQPLMEVTVYR                    | R | R | 95.00% | 72.70  | 38.00 | 5.89  | 1 | 0 | 2308.2 | 194 | 214 |    | 200      |
| (Q15223) Poliovirus receptor-related protein 1 precursor (Herpes virus entry mediator C) (HveC) (Nectin-1) (Herpesvirus Ig-like receptor) (HlgR) (CD111 antigen)                                                 | PVRL1_HUMAN | 57140  | ADANPPATEYHWTLTNGLSLPK                   | K | G | 95.00% | 36.50  | 38.50 | 3.72  | 1 | 0 | 2284.1 | 271 | 291 |    | 286      |
| (Q15262) Receptor-type tyrosine-protein phosphatase kappa precursor (EC 3.1.3.48) (Protein tyrosine phosphatase kappa) (R-PTP-kappa)                                                                             | PTPRK_HUMAN | 162071 | VNKGPLANPIWNVGTGFTGR                     | R | D | 95.00% | 68.40  | 38.90 | 6.07  | 1 | 0 | 2042.1 | 129 | 147 |    | 140      |
| (Q15262) Receptor-type tyrosine-protein phosphatase kappa precursor (EC 3.1.3.48) (Protein tyrosine phosphatase kappa) (R-PTP-kappa)                                                                             | PTPRK_HUMAN | 162071 | GPLANPIWNVGTGFTGR                        | K | D | 95.00% | 88.40  | 38.70 | 11.50 | 1 | 0 | 1700.9 | 132 | 147 |    | 140      |
| (Q15262) Receptor-type tyrosine-protein phosphatase kappa precursor (EC 3.1.3.48) (Protein tyrosine phosphatase kappa) (R-PTP-kappa)                                                                             | PTPRK_HUMAN | 162071 | LGDEVNAGQNTATFCIATGR                     | R | D | 95.00% | 76.80  | 38.10 | 5.24  | 2 | 0 | 2222.1 | 201 | 221 |    | 211      |
| (Q15262) Receptor-type tyrosine-protein phosphatase kappa precursor (EC 3.1.3.48) (Protein tyrosine phosphatase kappa) (R-PTP-kappa)                                                                             | PTPRK_HUMAN | 162071 | IAVDWESLGYNITR                           | R | C | 95.00% | 63.80  | 38.50 | 3.54  | 1 | 0 | 1637.8 | 406 | 419 |    | 416      |
| (Q5ZPR3) CD276 antigen precursor (Costimulatory molecule) (B7 homolog 3) (B7-H3) (4lg-B7-H3)                                                                                                                     | CD276_HUMAN | 57216  | QLVHSFAEGQDQGSAYANR                      | K | T | 95.00% | 0.00   | 0.00  | 11.30 | 1 | 0 | 2061.9 | 74  | 92  |    | 91       |
| (Q5ZPR3) CD276 antigen precursor (Costimulatory molecule) (B7 homolog 3) (B7-H3) (4lg-B7-H3)                                                                                                                     | CD276_HUMAN | 57216  | TALFPDLLAQGNASLR                         | R | L | 95.00% | 105.00 | 39.20 | 7.21  | 2 | 0 | 1687.9 | 93  | 108 |    | 104      |
| (Q5ZPR3) CD276 antigen precursor (Costimulatory molecule) (B7 homolog 3) (B7-H3) (4lg-B7-H3)                                                                                                                     | CD276_HUMAN | 57216  | VVLGANGTYSLVR                            | R | N | 95.00% | 90.40  | 38.90 | 6.41  | 1 | 0 | 1509.8 | 210 | 223 |    | 215      |
| (Q5ZPR3) CD276 antigen precursor (Costimulatory molecule) (B7 homolog 3) (B7-H3) (4lg-B7-H3)                                                                                                                     | CD276_HUMAN | 57216  | GYPEAEVFWQDGGVPLTGNVTTSQMANEQGLFDVHS VLR | R | V | 95.00% | 112.00 | 37.50 | 7.57  | 0 | 2 | 4395.1 | 388 | 427 |    | 407      |
| (Q6EMK4) Vasorin precursor (Protein Slit-like 2)                                                                                                                                                                 | VASN_HUMAN  | 71696  | LHEITNETFR                               | R | G | 95.00% | 49.20  | 38.80 | 4.09  | 1 | 0 | 1260.6 | 112 | 121 |    | 117      |
| (Q6EMK4) Vasorin precursor (Protein Slit-like 2)                                                                                                                                                                 | VASN_HUMAN  | 71696  | LPASLAEYTVTLRPNATYSVCVMPLGPGR            | R | V | 95.00% | 103.00 | 38.50 | 11.10 | 0 | 2 | 3278.7 | 513 | 542 |    | 528      |
| (Q8IWA5) Choline transporter-like protein 2 (Solute carrier family 44 member 2)                                                                                                                                  | CTL2_HUMAN  | 80138  | KNITDLVEGAK                              | R | K | 95.00% | 55.30  | 38.90 | 2.42  | 2 | 0 | 1188.6 | 199 | 209 |    | 200      |
| (Q8IWA5) Choline transporter-like protein 2 (Solute carrier family 44 member 2)                                                                                                                                  | CTL2_HUMAN  | 80138  | TCNPETFPSSNESR                           | K | Q | 95.00% | 83.10  | 38.70 | 6.00  | 1 | 0 | 1626.7 | 407 | 420 |    | 417      |
| (Q8IZP9) G-protein coupled receptor 64 precursor (Epididymis-specific protein 6) (He6 receptor)                                                                                                                  | GPR64_HUMAN | 111476 | TFNASGVKPKQR                             | K | N | 95.00% | 43.80  | 38.90 | 2.21  | 1 | 0 | 1205.6 | 97  | 107 |    | 99       |
| (Q8IZP9) G-protein coupled receptor 64 precursor (Epididymis-specific protein 6) (He6 receptor)                                                                                                                  | GPR64_HUMAN | 111476 | NICNLSSICNDSAFFR                         | R | G | 95.00% | 89.60  | 38.50 | 6.82  | 1 | 0 | 1919.8 | 108 | 123 |    | 111, 117 |
| (Q8NBJ4) Golgi phosphoprotein 2 (Golgi membrane protein GP73)                                                                                                                                                    | GP73_HUMAN  | 45315  | AVLVNNTTGER                              | K | L | 95.00% | 57.50  | 38.80 | 6.51  | 1 | 0 | 1288.7 | 104 | 115 |    | 109      |
| (Q8NCC3) 1-O-acylceramide synthase precursor (EC 2.3.1.-) (ACS) (Lysosomal phospholipase A2) (Lysophospholipase 3) (LPLA2) (LCAT-like lysophospholipase) (LLPL)                                                  | LYP3_HUMAN  | 46641  | SAVSTSWLLPYNYTWSPEK                      | R | V | 95.00% | 45.70  | 38.20 | 9.42  | 2 | 0 | 2230.1 | 262 | 280 |    | 273      |
| (Q8NCC3) 1-O-acylceramide synthase precursor (EC 2.3.1.-) (ACS) (Lysosomal phospholipase A2) (Lysophospholipase 3) (LPLA2) (LCAT-like lysophospholipase) (LLPL)                                                  | LYP3_HUMAN  | 46641  | VFVQPTTINVTLR                            | K | D | 95.00% | 56.20  | 39.00 | 4.70  | 2 | 0 | 1552.8 | 281 | 293 |    | 289      |
| (Q8WUT4) Protein C20orf75 precursor                                                                                                                                                                              | CT075_HUMAN | 78826  | AFACFPALQLNLSCIALGR                      | R | G | 95.00% | 86.90  | 38.40 | 9.92  | 2 | 0 | 2224.1 | 165 | 184 |    | 176      |
| (Q92485) Acid sphingomyelinase-like phosphodiesterase 3b precursor (EC 3.1.4.-) (ASM-like phosphodiesterase 3b)                                                                                                  | ASM3B_HUMAN | 50796  | DMVYTFMNLISQANAQGTFR                     | K | W | 95.00% | 97.20  | 38.80 | 9.42  | 1 | 0 | 2177.0 | 336 | 354 |    | 343      |
| (Q92823) Neuronal cell adhesion molecule precursor (Nr-CAM) (NgCAM-related cell adhesion molecule) (Ng-CAM-related) (hBravo)                                                                                     | NRCAM_HUMAN | 143877 | VNVVNSTLAEVHWDVPLK                       | R | S | 95.00% | 75.40  | 38.30 | 7.01  | 2 | 0 | 2118.1 | 854 | 872 |    | 858      |
| (Q92876) Kallikrein-6 precursor (EC 3.4.21.-) (Protease M) (Neurosin) (Zyme) (SP59)                                                                                                                              | KLK6_HUMAN  | 26838  | DCSANTTSHILGWGK                          | R | T | 95.00% | 72.20  | 39.00 | 8.06  | 1 | 0 | 1807.8 | 130 | 145 |    | 134      |
| (Q92896) Golgi apparatus protein 1 precursor (Golgi sialoglycoprotein MG-160) (E-selectin ligand 1) (ESL1) (Cysteine-rich fibroblast growth factor receptor) (CFR-1)                                             | GSLG1_HUMAN | 134577 | GNITEYQCHQYTK                            | R | M | 95.00% | 65.30  | 38.80 | 1.47  | 1 | 0 | 1755.8 | 209 | 222 |    | 210      |
| (Q969P0) Immunoglobulin superfamily member 8 precursor (CD81 partner 3) (Glu-Trp-Ile EWI motif containing protein 2) (EWI-2) (Keratinocytes-associated transmembrane protein 4) (KCT-4) (LIR-D1) (CD316 antigen) | IGSF8_HUMAN | 65015  | IGPGPELLELLCNVSGALPPAGR                  | R | H | 95.00% | 58.80  | 38.50 | 6.49  | 1 | 0 | 2218.2 | 316 | 337 |    | 327      |
| (Q96AY3) FK506-binding protein 10 precursor (EC 5.2.1.8) (Peptidyl-prolyl cis-trans isomerase) (PPIase) (Rotamase) (65 kDa FK506-binding protein) (FKBP65) (Immunophilin FKBP65)                                 | FKB10_HUMAN | 64228  | YHYNGTFEDGK                              | R | K | 95.00% | 44.10  | 39.20 | 3.68  | 1 | 0 | 1331.6 | 67  | 77  |    | 70       |
| (Q96AY3) FK506-binding protein 10 precursor (EC 5.2.1.8) (Peptidyl-prolyl cis-trans isomerase) (PPIase) (Rotamase) (65 kDa FK506-binding protein) (FKBP65) (Immunophilin FKBP65)                                 | FKB10_HUMAN | 64228  | YHYNGTLLDGTSFDTSYSK                      | R | G | 95.00% | 112.00 | 38.80 | 8.70  | 1 | 1 | 2170.0 | 179 | 197 |    | 182      |
| (Q96AY3) FK506-binding protein 10 precursor (EC 5.2.1.8) (Peptidyl-prolyl cis-trans isomerase) (PPIase) (Rotamase) (65 kDa FK506-binding protein) (FKBP65) (Immunophilin FKBP65)                                 | FKB10_HUMAN | 64228  | TLSRPSSETCNETTK                          | R | L | 95.00% | 47.50  | 38.70 | 4.04  | 2 | 0 | 1624.7 | 384 | 397 |    | 393      |
| (Q96AY3) FK506-binding protein 10 precursor (EC 5.2.1.8) (Peptidyl-prolyl cis-trans isomerase) (PPIase) (Rotamase) (65 kDa FK506-binding protein) (FKBP65) (Immunophilin FKBP65)                                 | FKB10_HUMAN | 64228  | YHYNCSLLDGTQLFTSHDYGAPOEATLGANK          | R | V | 95.00% | 63.50  | 38.50 | 8.06  | 0 | 1 | 3473.6 | 404 | 434 |    | 407      |

List of Glycopeptide Identified

|                                                                                                                                                                                                                              |             |        |                                   |   |   |        |        |       |      |   |   |        |      |      |      |
|------------------------------------------------------------------------------------------------------------------------------------------------------------------------------------------------------------------------------|-------------|--------|-----------------------------------|---|---|--------|--------|-------|------|---|---|--------|------|------|------|
| (Q96HE7) ERO1-like protein alpha precursor (EC 1.8.4.-) (ERO1-Lalpha) (Oxidoreductin-1-Lalpha) (Endoplasmic oxidoreductin-1-like protein) (ERO1-L)                                                                           | ERO1A_HUMAN | 54377  | WGHNITEFQQR                       | K | F | 95.00% | 50.00  | 38.70 | 4.06 | 1 | 0 | 1416.7 | 277  | 287  | 280  |
| (Q99519) Sialidase-1 precursor (EC 3.2.1.18) (Lysosomal sialidase) (N-acetyl-alpha-neuraminidase 1) (Acetylneuraminyl hydrolase) (G9 sialidase)                                                                              | NEUR1_HUMAN | 45449  | NLSLDIGTEVFAPGPGSGIQK             | R | Q | 95.00% | 53.80  | 38.60 | 3.85 | 1 | 0 | 2101.1 | 186  | 206  | 186  |
| (Q99519) Sialidase-1 precursor (EC 3.2.1.18) (Lysosomal sialidase) (N-acetyl-alpha-neuraminidase 1) (Acetylneuraminyl hydrolase) (G9 sialidase)                                                                              | NEUR1_HUMAN | 45449  | WSFSNGTSWR                        | R | K | 95.00% | 56.70  | 39.20 | 1.85 | 1 | 0 | 1228.5 | 348  | 357  | 352  |
| (Q99538) Legumain precursor (EC 3.4.22.34) (Asparaginyl endopeptidase) (Protease, cysteine 1)                                                                                                                                | LGMN_HUMAN  | 49393  | DLNETIHYMYK                       | K | H | 95.00% | 60.70  | 38.80 | 2.00 | 1 | 0 | 1427.7 | 165  | 175  | 167  |
| (Q99715) Collagen alpha-1(XII) chain precursor                                                                                                                                                                               | COCA1_HUMAN | 333174 | EAGNITTDGYEILGK                   | K | L | 95.00% | 54.40  | 39.20 | 3.57 | 1 | 0 | 1581.8 | 2676 | 2690 | 2679 |
| (Q9H3G5) Probable serine carboxypeptidase CPVL precursor (EC 3.4.16.-) (Carboxypeptidase, vitellogenic-like) (Vitellogenic carboxypeptidase-like protein) (VCP-like protein) (HVLP)                                          | CPVL_HUMAN  | 54148  | SYAGFLTNNK                        | K | T | 95.00% | 63.20  | 39.40 | 1.82 | 1 | 0 | 1100.6 | 73   | 82   | 81   |
| (Q9H3G5) Probable serine carboxypeptidase CPVL precursor (EC 3.4.16.-) (Carboxypeptidase, vitellogenic-like) (Vitellogenic carboxypeptidase-like protein) (VCP-like protein) (HVLP)                                          | CPVL_HUMAN  | 54148  | QAIHVGNQTFNDGTVIEK                | R | Y | 95.00% | 0.00   | 0.00  | 9.59 | 2 | 0 | 1955.0 | 340  | 357  | 346  |
| (Q9H5V8) CUB domain-containing protein 1 precursor (Transmembrane and associated with src kinases) (Membrane glycoprotein gp140) (Subtractive immunization M plus HEp3 associated 135 kDa protein) (SIMA135) (CD318 antigen) | CDCP1_HUMAN | 92858  | IGTFCSNGTVSR                      | R | I | 95.00% | 67.10  | 39.10 | 1.55 | 1 | 0 | 1299.6 | 174  | 185  | 180  |
| (Q9HAT2) Sialate O-acetyltransferase precursor (EC 3.1.1.53) (Sialic acid-specific 9-O-acetyltransferase) (H-Lse)                                                                                                            | SIAE_HUMAN  | 58297  | ALAYGEKNLTFEGPLPEK                | R | I | 95.00% | 95.10  | 38.30 | 5.57 | 1 | 0 | 1978.0 | 394  | 411  | 401  |
| (Q9P2B2) Prostaglandin F2 receptor negative regulator precursor (Prostaglandin F2-alpha receptor regulatory protein) (Prostaglandin F2-alpha receptor-associated protein) (CD9 partner 1) (CD9P-1) (CD315 antigen)           | FPRP_HUMAN  | 98538  | AAVPKNVSVAEKG                     | R | E | 95.00% | 40.90  | 38.70 | 1.05 | 1 | 0 | 1270.7 | 281  | 293  | 286  |
| (Q9P2B2) Prostaglandin F2 receptor negative regulator precursor (Prostaglandin F2-alpha receptor regulatory protein) (Prostaglandin F2-alpha receptor-associated protein) (CD9 partner 1) (CD9P-1) (CD315 antigen)           | FPRP_HUMAN  | 98538  | ELDLTCNITDDR                      | K | A | 95.00% | 49.80  | 39.10 | 1.85 | 1 | 0 | 1451.7 | 294  | 305  | 300  |
| (Q9P2B2) Prostaglandin F2 receptor negative regulator precursor (Prostaglandin F2-alpha receptor regulatory protein) (Prostaglandin F2-alpha receptor-associated protein) (CD9 partner 1) (CD9P-1) (CD315 antigen)           | FPRP_HUMAN  | 98538  | LENWTDASR                         | K | V | 95.00% | 44.90  | 38.60 | 4.08 | 1 | 0 | 1092.5 | 616  | 624  | 618  |
| (Q9P2B2) Prostaglandin F2 receptor negative regulator precursor (Prostaglandin F2-alpha receptor regulatory protein) (Prostaglandin F2-alpha receptor-associated protein) (CD9 partner 1) (CD9P-1) (CD315 antigen)           | FPRP_HUMAN  | 98538  | EAATSLNPIEIDFQTSGPIFNASVHSDTPSVIR | R | G | 95.00% | 113.00 | 38.40 | 4.74 | 0 | 1 | 3602.8 | 670  | 703  | 691  |
| (Q9UBG0) Macrophage mannose receptor 2 precursor (Urokinase receptor-associated protein) (Endocytic receptor 180) (CD280 antigen)                                                                                            | MRC2_HUMAN  | 166637 | VTPACNTSLPAQR                     | R | W | 95.00% | 80.20  | 39.10 | 4.10 | 2 | 0 | 1415.7 | 64   | 76   | 69   |
| (Q9UBG0) Macrophage mannose receptor 2 precursor (Urokinase receptor-associated protein) (Endocytic receptor 180) (CD280 antigen)                                                                                            | MRC2_HUMAN  | 166637 | TSNISKPGTLER                      | R | G | 95.00% | 53.20  | 38.70 | 4.47 | 2 | 0 | 1303.7 | 138  | 149  | 140  |
| (Q9UBG0) Macrophage mannose receptor 2 precursor (Urokinase receptor-associated protein) (Endocytic receptor 180) (CD280 antigen)                                                                                            | MRC2_HUMAN  | 166637 | WNDSPCNQSLPSICK                   | R | K | 95.00% | 64.30  | 38.60 | 5.05 | 1 | 0 | 1806.8 | 491  | 505  | 497  |
| (Q9UBG0) Macrophage mannose receptor 2 precursor (Urokinase receptor-associated protein) (Endocytic receptor 180) (CD280 antigen)                                                                                            | MRC2_HUMAN  | 166637 | GGCVALTGSAMGLWEVKNCTSFR           | R | A | 94.40% | 0.00   | 0.00  | 3.04 | 0 | 1 | 2589.2 | 616  | 639  | 634  |
| (Q9UBG0) Macrophage mannose receptor 2 precursor (Urokinase receptor-associated protein) (Endocytic receptor 180) (CD280 antigen)                                                                                            | MRC2_HUMAN  | 166637 | GTDPSPSPSPAALPPAPGTSELYLNGTFR     | K | L | 95.00% | 66.50  | 37.20 | 4.64 | 1 | 0 | 2914.4 | 1110 | 1138 | 1134 |
| (Q9UHG3) Prenylcysteine oxidase precursor (EC 1.8.3.5) (PCL1)                                                                                                                                                                | PCYOX_HUMAN | 56595  | LLHALGGDDFLGMLNR                  | K | T | 95.00% | 58.50  | 39.20 | 7.06 | 1 | 0 | 1758.9 | 182  | 197  | 196  |
| (Q9UHG3) Prenylcysteine oxidase precursor (EC 1.8.3.5) (PCL1)                                                                                                                                                                | PCYOX_HUMAN | 56595  | GELNTSIFSSRPIDK                   | K | F | 95.00% | 62.40  | 39.10 | 2.39 | 2 | 0 | 1664.8 | 350  | 364  | 353  |
| (Q9UHL4) Dipeptidyl-peptidase 2 precursor (EC 3.4.14.2) (Dipeptidyl-peptidase II) (DPP II) (Dipeptidyl aminopeptidase II) (Quiescent cell proline dipeptidase) (Dipeptidyl peptidase 7)                                      | DPP2_HUMAN  | 54311  | FGNKTFPQR                         | R | F | 95.00% | 39.00  | 38.70 | 0.66 | 1 | 0 | 1095.6 | 48   | 56   | 50   |
| (Q9UHL4) Dipeptidyl-peptidase 2 precursor (EC 3.4.14.2) (Dipeptidyl-peptidase II) (DPP II) (Dipeptidyl aminopeptidase II) (Quiescent cell proline dipeptidase) (Dipeptidyl peptidase 7)                                      | DPP2_HUMAN  | 54311  | ALAGLVYNASGSEHCYDIYR              | R | L | 95.00% | 147.00 | 38.80 | 7.29 | 1 | 0 | 2260.0 | 308  | 327  | 315  |
| (Q9UHL4) Dipeptidyl-peptidase 2 precursor (EC 3.4.14.2) (Dipeptidyl-peptidase II) (DPP II) (Dipeptidyl aminopeptidase II) (Quiescent cell proline dipeptidase) (Dipeptidyl peptidase 7)                                      | DPP2_HUMAN  | 54311  | RNLSASVIAVTIOGGAHHLDLR            | R | A | 95.00% | 61.90  | 38.60 | 6.77 | 0 | 1 | 2329.3 | 427  | 448  | 428  |

List of Glycopeptide Identified

|                                                                                                                                                                                                                                               |             |        |                          |   |   |        |        |       |      |   |   |        |     |     |          |     |
|-----------------------------------------------------------------------------------------------------------------------------------------------------------------------------------------------------------------------------------------------|-------------|--------|--------------------------|---|---|--------|--------|-------|------|---|---|--------|-----|-----|----------|-----|
| (Q9UHX3) EGF-like module-containing mucin-like hormone receptor-like 2 precursor (EGF-like module EMR2) (CD312 antigen)                                                                                                                       | EMR2_HUMAN  | 90454  | WCPQDSSCVNATACR          | R | C | 95.00% | 61.00  | 39.10 | 5.74 | 1 | 0 | 1812.7 | 32  | 46  |          | 41  |
| (Q9UMF0) Intercellular adhesion molecule 5 precursor (ICAM-5) (Telencephalin)                                                                                                                                                                 | ICAM5_HUMAN | 97311  | VELMPLPPWQVGENFTLSCR     | R | V | 95.00% | 44.10  | 38.30 | 5.14 | 1 | 0 | 2487.2 | 123 | 143 |          | 137 |
| (Q9UMF0) Intercellular adhesion molecule 5 precursor (ICAM-5) (Telencephalin)                                                                                                                                                                 | ICAM5_HUMAN | 97311  | FEEPSCPSONWTVVEGSGR      | R | L | 95.00% | 73.50  | 38.40 | 4.54 | 2 | 0 | 2125.9 | 575 | 592 |          | 583 |
| (Q9UMF0) Intercellular adhesion molecule 5 precursor (ICAM-5) (Telencephalin)                                                                                                                                                                 | ICAM5_HUMAN | 97311  | VLAPGIYVCNATNR           | R | H | 95.00% | 85.30  | 38.70 | 4.51 | 1 | 0 | 1548.8 | 637 | 650 |          | 646 |
| (Q9UMR5) Palmitoyl-protein thioesterase 2 precursor (EC 3.1.2.22) (Palmitoyl-protein hydrolase 2) (PPT-2) (G14)                                                                                                                               | PPT2_HUMAN  | 34291  | HLLEYINETHPGTIVTVLDLFDGR | R | E | 95.00% | 65.50  | 38.90 | 7.80 | 0 | 1 | 2739.4 | 54  | 77  |          | 60  |
| (Q9UMR5) Palmitoyl-protein thioesterase 2 precursor (EC 3.1.2.22) (Palmitoyl-protein hydrolase 2) (PPT-2) (G14)                                                                                                                               | PPT2_HUMAN  | 34291  | DHPNATVWR                | R | K | 95.00% | 0.00   | 0.00  | 4.19 | 1 | 0 | 1096.5 | 203 | 211 |          | 206 |
| (Q9UMR5) Palmitoyl-protein thioesterase 2 precursor (EC 3.1.2.22) (Palmitoyl-protein hydrolase 2) (PPT-2) (G14)                                                                                                                               | PPT2_HUMAN  | 34291  | CPMAGISHATAWHSNR         | R | T | 95.00% | 53.50  | 38.70 | 2.46 | 0 | 1 | 1725.8 | 276 | 290 |          | 289 |
| (Q9UNW1) Multiple inositol polyphosphate phosphatase 1 precursor (EC 3.1.3.62) (Inositol (1,3,4,5)-tetrakisphosphate 3-phosphatase) (Ins(1,3,4,5)P(4) 3-phosphatase)                                                                          | MINP1_HUMAN | 55035  | FLTEVEKNATALYHVEAFK      | K | T | 95.00% | 71.00  | 38.70 | 5.85 | 0 | 2 | 2211.1 | 235 | 253 | 242      |     |
| (Q9Y2E5) Epididymis-specific alpha-mannosidase precursor (EC 3.2.1.24) (Mannosidase alpha class 2B member 2)                                                                                                                                  | MA2B2_HUMAN | 113870 | QEIFTHIMDQYSYCTPSHIPFSNR | R | S | 95.00% | 0.00   | 0.00  | 4.54 | 0 | 1 | 2971.3 | 204 | 227 |          | 226 |
| (Q9Y2E5) Epididymis-specific alpha-mannosidase precursor (EC 3.2.1.24) (Mannosidase alpha class 2B member 2)                                                                                                                                  | MA2B2_HUMAN | 113870 | ALHALNVTVWR              | R | V | 95.00% | 39.20  | 38.80 | 5.35 | 2 | 0 | 1181.6 | 331 | 340 |          | 336 |
| (Q9Y2E5) Epididymis-specific alpha-mannosidase precursor (EC 3.2.1.24) (Mannosidase alpha class 2B member 2)                                                                                                                                  | MA2B2_HUMAN | 113870 | NMTAQNYTYAIR             | R | S | 95.00% | 87.20  | 38.90 | 5.66 | 2 | 0 | 1463.6 | 670 | 681 |          | 675 |
| (Q9Y2E5) Epididymis-specific alpha-mannosidase precursor (EC 3.2.1.24) (Mannosidase alpha class 2B member 2)                                                                                                                                  | MA2B2_HUMAN | 113870 | RPYVSYVNNISAR            | R | N | 95.00% | 64.90  | 38.70 | 4.17 | 2 | 0 | 1539.8 | 741 | 753 |          | 748 |
| (Q9Y4L1) 150 kDa oxygen-regulated protein precursor (Orp150) (Hypoxia up-regulated 1)                                                                                                                                                         | OXRP_HUMAN  | 111319 | VFGSQLTTVK               | R | L | 95.00% | 83.50  | 39.30 | 3.36 | 2 | 0 | 1194.6 | 510 | 520 | 515      |     |
| (Q9Y4L1) 150 kDa oxygen-regulated protein precursor (Orp150) (Hypoxia up-regulated 1)                                                                                                                                                         | OXRP_HUMAN  | 111319 | LSALDNLNHSSMFLK          | R | G | 95.00% | 52.90  | 38.70 | 8.20 | 2 | 1 | 1819.9 | 822 | 837 | 830      |     |
| (Q9Y4L1) 150 kDa oxygen-regulated protein precursor (Orp150) (Hypoxia up-regulated 1)                                                                                                                                                         | OXRP_HUMAN  | 111319 | VINETWAWK                | K | N | 95.00% | 69.50  | 39.40 | 1.12 | 2 | 0 | 1147.6 | 860 | 868 | 862      |     |
| (Q9Y4L1) 150 kDa oxygen-regulated protein precursor (Orp150) (Hypoxia up-regulated 1)                                                                                                                                                         | OXRP_HUMAN  | 111319 | VINETWAWKNATLAEQAK       | K | L | 95.00% | 101.00 | 38.90 | 8.13 | 1 | 1 | 2075.0 | 860 | 877 | 862, 869 |     |
| (Q9Y4L1) 150 kDa oxygen-regulated protein precursor (Orp150) (Hypoxia up-regulated 1)                                                                                                                                                         | OXRP_HUMAN  | 111319 | DKNGTRAEPLNLNASASDQGEK   | K | V | 95.00% | 66.90  | 38.60 | 4.04 | 1 | 0 | 2187.0 | 920 | 940 | 931      | 922 |
| (Q9Y4L1) 150 kDa oxygen-regulated protein precursor (Orp150) (Hypoxia up-regulated 1)                                                                                                                                                         | OXRP_HUMAN  | 111319 | AEPPLNASASDQGEK          | R | V | 95.00% | 75.30  | 38.70 | 7.46 | 5 | 0 | 1514.7 | 926 | 940 | 931      | 922 |
| (Q9Y5Y6) Suppressor of tumorigenicity protein 14 (EC 3.4.21.-) (Serine protease 14) (Matriptase) (Membrane-type serine protease 1) (MT-SP1) (Prostamin) (Serine protease TADG-15) (Tumor-associated differentially-expressed gene 15 protein) | ST14_HUMAN  | 94751  | VINQTTCCENLLPQQITPR      | R | M | 95.00% | 52.90  | 38.70 | 4.62 | 1 | 0 | 2126.1 | 770 | 787 |          | 772 |
| (Q9Y653) G-protein coupled receptor 56 precursor (TM7XN1 protein)                                                                                                                                                                             | GPR56_HUMAN | 77721  | VANLTPVVLTFQHQLQPK       | K | N | 95.00% | 58.50  | 38.60 | 5.41 | 1 | 0 | 2163.2 | 322 | 340 |          | 324 |



# List of Glycopeptide Identified

## GlycoPeptide Identified in ARO Cell Line

Experiment: ARO-p65-p67-PNGF-072208

Peak List Generator Version: BioWorks 3.3.1  
 Charge States Calculated: yes  
 Database Set: Database Name: the Sprot\_060206 database  
 Version: 06/26/06  
 Taxonomy: Homo sapiens  
 Number of Proteins: 14164  
 Search Engine Set: 2 Search Engines  
 Search Engine: Mascot; Version: 2.1.03  
 Fragment Tolerance: 0.80 Da (Monoisotopic)  
 Parent Tolerance: 1.6 Da (Monoisotopic)  
 Fixed Modifications: +57 on C (Carbamidomethyl)  
 Variable Modifications: +1 on N (Deamidation), +16 on M (Oxidation)  
 Database: the Sprot\_060206 database (selected for Homo sapiens, unknown version, 14164 entries)  
 Digestion Enzyme: Trypsin; Max Missed Cleavages: 2  
 Search Engine: XI Tandem; Version: 2007.01.01.1  
 Fragment Tolerance: 0.100 Da (Monoisotopic)  
 Parent Tolerance: 1.6 Da (Monoisotopic)  
 Fixed Modifications: +57 on C (Carbamidomethyl)  
 Variable Modifications: +1 on N (Deamidation), +16 on M (Oxidation)  
 Database: a subset of the uniprot\_sprot\_060206-oval database  
 Digestion Enzyme: Trypsin; Max Missed Cleavages: 2  
 Scaffold Version: Scaffold-2\_00\_00\_final

| Protein name                                                                                                                                                                                                                                        | Swiss-Prot Accession Name | Protein molecular weight (Da) | Peptide sequence                  | Previous amino acid | Next amino acid | Best Peptide identification probability | Best Mascot Ion score | Best Mascot Identity score | Best XI Tandem - log(e) score | Number of identified +2H spectra | Number of identified +3H spectra | Calculated +1H Peptide Mass (AMU) | Peptide start index | Peptide stop index | N-linked Site | Potential N-linked site |
|-----------------------------------------------------------------------------------------------------------------------------------------------------------------------------------------------------------------------------------------------------|---------------------------|-------------------------------|-----------------------------------|---------------------|-----------------|-----------------------------------------|-----------------------|----------------------------|-------------------------------|----------------------------------|----------------------------------|-----------------------------------|---------------------|--------------------|---------------|-------------------------|
| (O00115) Deoxyribonuclease-2-alpha precursor (EC 3.1.22.1) (Deoxyribonuclease II alpha) (DNase II alpha) (Acid DNase) (Lysosomal DNase II) (R31240_2)                                                                                               | DNS2A_HUMAN               | 39563                         | GHHVSOEPWNSITLTSQAGAVFQSFSAK      | K                   | F               | 95%                                     | 61.0                  | 38.8                       | 3.64                          | 0                                | 1                                | 3015.46                           | 203                 | 230                | 212           |                         |
| (O00462) Beta-mannosidase precursor (EC 3.2.1.25) (Lysosomal beta A mannosidase) (Mannanase) (Mannase)                                                                                                                                              | MANBA_HUMAN               | 100879                        | WVSLDNWYTSK                       | R                   | E               | 95%                                     | 66.1                  | 38.7                       | 4.92                          | 2                                | 0                                | 1399.65                           | 72                  | 82                 |               | 77                      |
| (O00468) Agrin precursor                                                                                                                                                                                                                            | AGRN_HUMAN                | 214863                        | NELMLNSSLMR                       | K                   | I               | 95%                                     | 71.9                  | 38.6                       | 5.44                          | 2                                | 0                                | 1340.62                           | 130                 | 140                |               | 135                     |
| (O00468) Agrin precursor                                                                                                                                                                                                                            | AGRN_HUMAN                | 214863                        | DPCSNIWTCSEFGSTCAR                | R                   | S               | 95%                                     | 92.0                  | 38.9                       | 9.49                          | 1                                | 0                                | 1819.71                           | 246                 | 261                |               | 250                     |
| (O00468) Agrin precursor                                                                                                                                                                                                                            | AGRN_HUMAN                | 214863                        | GPTTFAPLPVPVAPLHCAQTPYGCCQDNITAAR | R                   | G               | 95%                                     | 70.3                  | 38.7                       | 6.85                          | 0                                | 2                                | 3381.58                           | 752                 | 782                |               | 777                     |
| (O00592) Podocalyxin-like protein 1 precursor                                                                                                                                                                                                       | PODXL_HUMAN               | 55578                         | QLVLNLTGNLTCAGGASDEK              | K                   | L               | 95%                                     | 69.1                  | 38.8                       | 4.28                          | 1                                | 0                                | 2062.01                           | 326                 | 345                |               | 330                     |
| (O00754) Lysosomal alpha-mannosidase precursor (EC 3.2.1.24) (Mannosidase, alpha B) (Lysosomal acid alpha-mannosidase) (Laman) (Mannosidase alpha class 2B member 1) (Contains: Lysosomal alpha-mannosidase A peptide; Lysosomal alpha-mannosidase) | MA2B1_HUMAN               | 113656                        | TPLVQEVHQNFSAWCQSVVR              | K                   | L               | 95%                                     | 56.3                  | 38.9                       | 4.42                          | 0                                | 1                                | 2386.16                           | 682                 | 701                |               | 692                     |
| (O00754) Lysosomal alpha-mannosidase precursor (EC 3.2.1.24) (Mannosidase, alpha B) (Lysosomal acid alpha-mannosidase) (Laman) (Mannosidase alpha class 2B member 1) (Contains: Lysosomal alpha-mannosidase A peptide; Lysosomal alpha-mannosidase) | MA2B1_HUMAN               | 113656                        | LNQTEPVAGNYYPVNTR                 | K                   | I               | 95%                                     | 55.3                  | 38.6                       | 3.54                          | 1                                | 0                                | 1937.92                           | 764                 | 780                |               | 766                     |
| (O14672) ADAM 10 precursor (EC 3.4.24.81) (A disintegrin and metalloproteinase domain 10) (Mammalian disintegrin-metalloprotease) (Kuzbanian protein homolog) (CDw156c antigen)                                                                     | ADA10_HUMAN               | 84125                         | INTTADEKDPNPFPR                   | R                   | F               | 95%                                     | 82.2                  | 38.5                       | 4.96                          | 1                                | 1                                | 1719.82                           | 277                 | 291                | 278           |                         |
| (O14672) ADAM 10 precursor (EC 3.4.24.81) (A disintegrin and metalloproteinase domain 10) (Mammalian disintegrin-metalloprotease) (Kuzbanian protein homolog) (CDw156c antigen)                                                                     | ADA10_HUMAN               | 84125                         | EGICNGFTALCPASDPKPNFTDCNR         | R                   | H               | 95%                                     | 66.6                  | 39.0                       | 4.00                          | 0                                | 1                                | 2843.21                           | 533                 | 557                |               | 551                     |
| (O14773) Tripeptidyl-peptidase 1 precursor (EC 3.4.14.9) (Tripeptidyl-peptidase I) (TPP-I) (Tripeptidyl aminopeptidase) (Lysosomal pepstatin insensitive protease) (LPIC) (Growth-inhibiting gene 1 protein)                                        | TPP1_HUMAN                | 61230                         | FLSSSPHLPSSYFNASGR                | K                   | A               | 95%                                     | 85.2                  | 38.2                       | 7.37                          | 3                                | 0                                | 2051.98                           | 429                 | 447                | 443           |                         |
| (O15031) Plexin-B2 precursor (MM1)                                                                                                                                                                                                                  | PLXB2_HUMAN               | 205081                        | GGLNLTAVTVAAENNHHTVAFGLTSDGR      | R                   | I               | 95%                                     | 64.5                  | 37.7                       | 8.01                          | 1                                | 0                                | 2688.31                           | 388                 | 414                |               | 391_402                 |
| (O15031) Plexin-B2 precursor (MM1)                                                                                                                                                                                                                  | PLXB2_HUMAN               | 205081                        | SCVAVTSAQPOQIMSR                  | K                   | R               | 95%                                     | 102.0                 | 38.6                       | 6.31                          | 2                                | 0                                | 1652.74                           | 517                 | 531                |               | 528                     |
| (O15031) Plexin-B2 precursor (MM1)                                                                                                                                                                                                                  | PLXB2_HUMAN               | 205081                        | LHWLTYLNCSEFGR                    | K                   | S               | 95%                                     | 33.3                  | 39.0                       | 4.30                          | 1                                | 0                                | 1467.71                           | 753                 | 764                |               | 759                     |
| (O15031) Plexin-B2 precursor (MM1)                                                                                                                                                                                                                  | PLXB2_HUMAN               | 205081                        | SINVTGGQFSLIQR                    | R                   | F               | 95%                                     | 96.6                  | 38.7                       | 5.77                          | 2                                | 0                                | 1520.81                           | 1000                | 1013               |               | 1002                    |
| (O15031) Plexin-B2 precursor (MM1)                                                                                                                                                                                                                  | PLXB2_HUMAN               | 205081                        | EAESLOPMTVVGTDYVFHNDTK            | R                   | V               | 95%                                     | 40.0                  | 37.8                       | 2.43                          | 1                                | 0                                | 2498.14                           | 1031                | 1052               |               | 1049                    |
| (O15031) Plexin-B2 precursor (MM1)                                                                                                                                                                                                                  | PLXB2_HUMAN               | 205081                        | TEAGAFEVDPPTFENFTGGVVK            | R                   | K               | 95%                                     | 0.0                   | 0.0                        | 5.68                          | 1                                | 0                                | 2377.09                           | 1084                | 1105               |               | 1099                    |
| (O43490) Prominin-1 precursor (Prominin-like protein 1) (Antigen AC133) (CD133 antigen)                                                                                                                                                             | PROM1_HUMAN               | 97188                         | EALLENMNSTLK                      | K                   | S               | 79%                                     | 39.0                  | 38.7                       | 0.00                          | 1                                | 0                                | 1250.59                           | 268                 | 278                |               | 274                     |
| (O43490) Prominin-1 precursor (Prominin-like protein 1) (Antigen AC133) (CD133 antigen)                                                                                                                                                             | PROM1_HUMAN               | 97188                         | VLNSIGSDIDNVQTR                   | R                   | L               | 95%                                     | 84.8                  | 39.0                       | 5.55                          | 1                                | 0                                | 1632.81                           | 385                 | 399                |               | 395                     |
| (O60635) Tetraspanin-1 (Tspan-1) (Tetraspanin NET-1) (Tetraspanin TM4-C)                                                                                                                                                                            | TSN1_HUMAN                | 26283                         | DYGSQEDFTQVWNTTMK                 | K                   | G               | 95%                                     | 83.2                  | 38.6                       | 7.27                          | 2                                | 0                                | 2050.87                           | 129                 | 145                |               | 141                     |
| (O60637) Tetraspanin-3 (Tspan-3) (Transmembrane 4 superfamily member 8) (Tetraspanin TM4-A)                                                                                                                                                         | TSN3_HUMAN                | 28000                         | QLHCCGHINVDWEDNTDWFK              | R                   | E               | 95%                                     | 0.0                   | 0.0                        | 4.96                          | 0                                | 2                                | 2593.07                           | 144                 | 163                |               | 152                     |
| (O60637) Tetraspanin-3 (Tspan-3) (Transmembrane 4 superfamily member 8) (Tetraspanin TM4-A)                                                                                                                                                         | TSN3_HUMAN                | 28000                         | NQSVPLSCCR                        | K                   | E               | 95%                                     | 28.8                  | 39.4                       | 3.68                          | 1                                | 0                                | 1221.54                           | 167                 | 176                |               | 167                     |



List of Glycopeptide Identified

|                                                                                                                                                                                                       |             |        |                                                                                                                |   |   |     |       |      |       |   |   |         |     |     |     |          |
|-------------------------------------------------------------------------------------------------------------------------------------------------------------------------------------------------------|-------------|--------|----------------------------------------------------------------------------------------------------------------|---|---|-----|-------|------|-------|---|---|---------|-----|-----|-----|----------|
| (O75503) Ceroid-lipofuscinosis neuronal protein 5 (Protein CLN5)                                                                                                                                      | CLN5_HUMAN  | 46323  | QDN <b>ETGIYYETW</b> NVK                                                                                       | K | A | 95% | 62.5  | 39.2 | 7.18  | 2 | 0 | 1860.83 | 201 | 213 |     | 203      |
| (O75503) Ceroid-lipofuscinosis neuronal protein 5 (Protein CLN5)                                                                                                                                      | CLN5_HUMAN  | 46323  | IFLYS <b>GEPTYLGN</b> ETSVFGPT <b>GNK</b>                                                                      | R | T | 95% | 96.2  | 38.3 | 10.00 | 1 | 0 | 2593.24 | 259 | 282 |     | 271, 281 |
| (O75882) Attractin precursor (Mahogany homolog) (DPPT-L)                                                                                                                                              | ATRN_HUMAN  | 158518 | IDST <b>GNVTNELR</b>                                                                                           | K | V | 95% | 92.9  | 38.8 | 4.66  | 2 | 0 | 1319.64 | 411 | 422 | 416 |          |
| (O75976) Carboxypeptidase D precursor (EC 3.4.17.22) (Metallo-carboxypeptidase D) (gp180)                                                                                                             | CBPD_HUMAN  | 152899 | LL <b>NTD</b> VYLLPSLNPDG <b>FER</b>                                                                           | R | A | 95% | 53.2  | 38.1 | 5.29  | 2 | 0 | 2278.16 | 170 | 189 | 172 |          |
| (O75976) Carboxypeptidase D precursor (EC 3.4.17.22) (Metallo-carboxypeptidase D) (gp180)                                                                                                             | CBPD_HUMAN  | 152899 | FANEY <b>PNITR</b>                                                                                             | R | L | 95% | 49.9  | 38.9 | 1.80  | 1 | 0 | 1225.59 | 516 | 525 |     | 522      |
| (O95858) Tetraspanin-15 (Tspan-15) (Transmembrane 4 superfamily member 15) (Tetraspan NET-7)                                                                                                          | TSN15_HUMAN | 33148  | <b>NTTE</b> VVNTMCGYK                                                                                          | R | T | 95% | 62.0  | 39.1 | 2.00  | 1 | 0 | 1533.66 | 189 | 201 |     | 189      |
| (P01009) Alpha-1-antitrypsin precursor (Alpha-1 protease inhibitor) (Alpha-1-antiproteinase)                                                                                                          | A1AT_HUMAN  | 46720  | ADTHDEILE <b>GLN</b> FL <b>NL</b> TEIPEAQI <b>HGF</b> QELLR                                                    | K | T | 95% | 105.0 | 37.8 | 8.19  | 0 | 1 | 3692.81 | 94  | 125 | 107 |          |
| (P01009) Alpha-1-antitrypsin precursor (Alpha-1 protease inhibitor) (Alpha-1-antiproteinase)                                                                                                          | A1AT_HUMAN  | 46720  | Y <b>LGN</b> ATA <b>IF</b> FLP <b>D</b> E <b>KG</b>                                                            | K | L | 95% | 104.0 | 39.0 | 10.80 | 1 | 0 | 1756.88 | 268 | 283 | 271 |          |
| (P01033) Metalloproteinase inhibitor 1 precursor (TIMP-1) (Erythroid potentiating activity) (EPA) (Tissue inhibitor of metalloproteinases) (Fibroblast collagenase inhibitor) (Collagenase inhibitor) | TIMP1_HUMAN | 23153  | FV <b>GTPE</b> V <b>NQ</b> TTLY <b>QR</b>                                                                      | K | Y | 95% | 99.8  | 38.4 | 10.30 | 2 | 0 | 1753.88 | 46  | 60  | 53  |          |
| (P01137) Transforming growth factor beta-1 precursor (TGF-beta-1) [Contains: Latency-associated peptide (LAP)]                                                                                        | TGFB1_HUMAN | 44324  | LASPP <b>SQGEV</b> PP <b>GLPE</b> AVLAL <b>YN</b> STR                                                          | R | D | 95% | 67.9  | 37.8 | 4.89  | 1 | 0 | 2761.44 | 59  | 85  | 53  |          |
| (P01137) Transforming growth factor beta-1 precursor (TGF-beta-1) [Contains: Latency-associated peptide (LAP)]                                                                                        | TGFB1_HUMAN | 44324  | Q <b>STHS</b> Y <b>IMF</b> NT <b>S</b> ELR                                                                     | K | E | 95% | 0.0   | 0.0  | 4.72  | 1 | 0 | 1944.88 | 126 | 141 |     | 136      |
| (P02790) Hemopexin precursor (Beta-1B-glycoprotein)                                                                                                                                                   | HEMO_HUMAN  | 51659  | SW <b>PAV</b> GN <b>CS</b> ALR                                                                                 | R | W | 95% | 96.0  | 39.5 | 7.12  | 1 | 0 | 1405.65 | 181 | 193 | 187 |          |
| (P04062) Glucosylceramidase precursor (EC 3.2.1.45) (Beta-glucocerebrosidase) (Acid beta-glucosidase) (D-glucosyl-N-acylsphingosine glucylhydrolase) (Alglucerase) (Imiglucerase)                     | GLCM_HUMAN  | 59700  | IM <b>ELSM</b> GP <b>QIA</b> N <b>H</b> TG <b>LL</b> T <b>LQ</b> PE <b>QK</b>                                  | R | F | 95% | 70.6  | 38.0 | 6.96  | 1 | 2 | 2824.42 | 88  | 113 | 98  |          |
| (P04062) Glucosylceramidase precursor (EC 3.2.1.45) (Beta-glucocerebrosidase) (Acid beta-glucosidase) (D-glucosyl-N-acylsphingosine glucylhydrolase) (Alglucerase) (Imiglucerase)                     | GLCM_HUMAN  | 59700  | TYTYAD <b>TPD</b> DF <b>QL</b> <b>N</b> FS <b>LPE</b> ED <b>TK</b>                                             | R | L | 95% | 89.4  | 37.6 | 4.36  | 1 | 1 | 2848.25 | 171 | 194 | 185 |          |
| (P04062) Glucosylceramidase precursor (EC 3.2.1.45) (Beta-glucocerebrosidase) (Acid beta-glucosidase) (D-glucosyl-N-acylsphingosine glucylhydrolase) (Alglucerase) (Imiglucerase)                     | GLCM_HUMAN  | 59700  | DL <b>GP</b> TL <b>AN</b> ST <b>H</b> HN <b>VR</b>                                                             | R | L | 95% | 72.3  | 38.6 | 4.54  | 2 | 1 | 1632.81 | 302 | 316 | 309 |          |
| (P05026) Sodium/potassium-transporting ATPase subunit beta-1 (Sodium/potassium-dependent ATPase beta-1 subunit)                                                                                       | AT1B1_HUMAN | 35045  | FK <b>LE</b> W <b>LGN</b> CS <b>GL</b> ND <b>E</b> TY <b>GVK</b>                                               | R | E | 95% | 73.1  | 38.3 | 9.60  | 1 | 0 | 2396.08 | 151 | 170 | 158 |          |
| (P05026) Sodium/potassium-transporting ATPase subunit beta-1 (Sodium/potassium-dependent ATPase beta-1 subunit)                                                                                       | AT1B1_HUMAN | 35045  | YL <b>Q</b> LL <b>AVQ</b> FN <b>LT</b> MD <b>TE</b> IR                                                         | K | I | 95% | 116.0 | 38.6 | 11.10 | 1 | 0 | 2383.22 | 254 | 273 | 265 |          |
| (P05362) Intercellular adhesion molecule 1 precursor (ICAM-1) (Major group rhinovirus receptor) (CD54 antigen)                                                                                        | ICAM1_HUMAN | 57807  | <b>AN</b> LT <b>V</b> LLR                                                                                      | R | G | 95% | 76.2  | 38.8 | 1.41  | 1 | 0 | 999.62  | 144 | 152 | 145 |          |
| (P05362) Intercellular adhesion molecule 1 precursor (ICAM-1) (Major group rhinovirus receptor) (CD54 antigen)                                                                                        | ICAM1_HUMAN | 57807  | LN <b>PT</b> V <b>TG</b> ND <b>S</b> FS <b>AK</b>                                                              | R | A | 95% | 78.6  | 39.0 | 1.02  | 2 | 0 | 1614.77 | 259 | 273 |     | 267      |
| (P05556) Integrin beta-1 precursor (Fibronectin receptor beta subunit) (Integrin VLA-4 beta subunit) (CD29 antigen)                                                                                   | ITB1_HUMAN  | 88447  | SC <b>GC</b> E <b>IQ</b> AG <b>PN</b> CG <b>W</b> CT <b>N</b> ST <b>F</b> L <b>Q</b> E <b>GM</b> PT <b>SAR</b> | K | C | 95% | 60.3  | 38.7 | 8.85  | 1 | 2 | 3393.37 | 34  | 63  |     | 50       |
| (P05556) Integrin beta-1 precursor (Fibronectin receptor beta subunit) (Integrin VLA-4 beta subunit) (CD29 antigen)                                                                                   | ITB1_HUMAN  | 88447  | C <b>H</b> E <b>GN</b> GT <b>F</b> E <b>CG</b> AC <b>R</b>                                                     | K | C | 95% | 0.0   | 0.0  | 12.50 | 1 | 0 | 1638.57 | 477 | 490 |     | 481      |
| (P05556) Integrin beta-1 precursor (Fibronectin receptor beta subunit) (Integrin VLA-4 beta subunit) (CD29 antigen)                                                                                   | ITB1_HUMAN  | 88447  | EN <b>S</b> SE <b>IC</b> S <b>NN</b> GE <b>C</b> /CG <b>Q</b> C <b>VR</b>                                      | K | K | 95% | 111.0 | 38.1 | 5.92  | 1 | 0 | 2520.92 | 519 | 539 |     | 520      |
| (P05556) Integrin beta-1 precursor (Fibronectin receptor beta subunit) (Integrin VLA-4 beta subunit) (CD29 antigen)                                                                                   | ITB1_HUMAN  | 88447  | K <b>D</b> T <b>CT</b> Q <b>E</b> CS <b>Y</b> FN <b>ITK</b>                                                    | K | V | 95% | 96.2  | 38.8 | 8.01  | 2 | 1 | 1895.82 | 658 | 672 |     | 669      |
| (P06756) Integrin alpha-V precursor (Vitronectin receptor alpha subunit) (CD51 antigen) [Contains: Integrin alpha-V heavy chain; Integrin alpha-V light chain]                                        | ITAV_HUMAN  | 116037 | AN <b>T</b> Q <b>PG</b> IV <b>E</b> GG <b>Q</b> V <b>LK</b>                                                    | K | C | 95% | 63.7  | 39.0 | 2.80  | 2 | 0 | 1612.85 | 73  | 88  |     | 74       |
| (P06756) Integrin alpha-V precursor (Vitronectin receptor alpha subunit) (CD51 antigen) [Contains: Integrin alpha-V heavy chain; Integrin alpha-V light chain]                                        | ITAV_HUMAN  | 116037 | TA <b>AD</b> TT <b>LQ</b> PL <b>NQ</b> FT <b>PAN</b> ISR                                                       | R | Q | 95% | 126.0 | 38.8 | 7.82  | 2 | 0 | 2330.20 | 597 | 618 | 615 |          |
| (P06756) Integrin alpha-V precursor (Vitronectin receptor alpha subunit) (CD51 antigen) [Contains: Integrin alpha-V heavy chain; Integrin alpha-V light chain]                                        | ITAV_HUMAN  | 116037 | IS <b>S</b> L <b>Q</b> T <b>E</b> K <b>ND</b> T <b>V</b> AG <b>Q</b> GER                                       | K | D | 95% | 119.0 | 38.7 | 7.10  | 1 | 1 | 2034.99 | 865 | 883 |     | 874      |
| (P06865) Beta-hexosaminidase alpha chain precursor (EC 3.2.1.52) (N-acetyl-beta-glucosaminidase) (Beta-N-acetylhexosaminidase) (Hexosaminidase A)                                                     | HEXA_HUMAN  | 60672  | SA <b>E</b> G <b>T</b> FF <b>IN</b> K                                                                          | K | T | 95% | 64.0  | 39.4 | 3.74  | 2 | 0 | 1114.54 | 149 | 158 | 157 |          |
| (P06865) Beta-hexosaminidase alpha chain precursor (EC 3.2.1.52) (N-acetyl-beta-glucosaminidase) (Beta-N-acetylhexosaminidase) (Hexosaminidase A)                                                     | HEXA_HUMAN  | 60672  | SA <b>E</b> G <b>T</b> FF <b>IN</b> K <b>E</b> IE <b>D</b> FF <b>R</b>                                         | K | F | 95% | 80.9  | 38.7 | 8.34  | 1 | 0 | 2102.01 | 149 | 166 | 157 |          |
| (P07339) Cathepsin D precursor (EC 3.4.23.5) [Contains: Cathepsin D light chain; Cathepsin D heavy chain]                                                                                             | CATD_HUMAN  | 44535  | YY <b>K</b> GS <b>L</b> SY <b>LV</b> N <b>TR</b>                                                               | K | K | 95% | 69.5  | 38.9 | 4.96  | 2 | 0 | 1564.80 | 254 | 266 | 263 |          |

List of Glycopeptide Identified

|                                                                                                                                                                                                                                                         |             |        |                            |  |  |  |  |  |  |  |  |  |  |  |  |  |  |  |  |
|---------------------------------------------------------------------------------------------------------------------------------------------------------------------------------------------------------------------------------------------------------|-------------|--------|----------------------------|--|--|--|--|--|--|--|--|--|--|--|--|--|--|--|--|
| (P07339) Cathepsin D precursor (EC 3.4.23.5)<br>[Contains: Cathepsin D light chain; Cathepsin D heavy chain]                                                                                                                                            | CATD_HUMAN  | 44535  | GSLSYLVNTR                 |  |  |  |  |  |  |  |  |  |  |  |  |  |  |  |  |
| (P07602) Proactivator polypeptide precursor<br>[Contains: Saposin A (Protein A); Saposin B-Val; Saposin B (Sphingolipid activator protein 1) (SAP-1) (Cerebroside sulfate activator) (CSAct) (Dispersin) (Sulfatide/GM1 activator); Saposin C (Co-beta- | SAP_HUMAN   | 58094  | DVVTAAGDMLKDNATEEIEILVYLEK |  |  |  |  |  |  |  |  |  |  |  |  |  |  |  |  |
| (P07602) Proactivator polypeptide precursor<br>[Contains: Saposin A (Protein A); Saposin B-Val; Saposin B (Sphingolipid activator protein 1) (SAP-1) (Cerebroside sulfate activator) (CSAct) (Dispersin) (Sulfatide/GM1 activator); Saposin C (Co-beta- | SAP_HUMAN   | 58094  | DNATEEIEILVYLEK            |  |  |  |  |  |  |  |  |  |  |  |  |  |  |  |  |
| (P07602) Proactivator polypeptide precursor<br>[Contains: Saposin A (Protein A); Saposin B-Val; Saposin B (Sphingolipid activator protein 1) (SAP-1) (Cerebroside sulfate activator) (CSAct) (Dispersin) (Sulfatide/GM1 activator); Saposin C (Co-beta- | SAP_HUMAN   | 58094  | TCDWLPKPNMSASCK            |  |  |  |  |  |  |  |  |  |  |  |  |  |  |  |  |
| (P07602) Proactivator polypeptide precursor<br>[Contains: Saposin A (Protein A); Saposin B-Val; Saposin B (Sphingolipid activator protein 1) (SAP-1) (Cerebroside sulfate activator) (CSAct) (Dispersin) (Sulfatide/GM1 activator); Saposin C (Co-beta- | SAP_HUMAN   | 58094  | TNSTFVQALVEHVK             |  |  |  |  |  |  |  |  |  |  |  |  |  |  |  |  |
| (P07602) Proactivator polypeptide precursor<br>[Contains: Saposin A (Protein A); Saposin B-Val; Saposin B (Sphingolipid activator protein 1) (SAP-1) (Cerebroside sulfate activator) (CSAct) (Dispersin) (Sulfatide/GM1 activator); Saposin C (Co-beta- | SAP_HUMAN   | 58094  | TNSTFVQALVEHVKEECDR        |  |  |  |  |  |  |  |  |  |  |  |  |  |  |  |  |
| (P07602) Proactivator polypeptide precursor<br>[Contains: Saposin A (Protein A); Saposin B-Val; Saposin B (Sphingolipid activator protein 1) (SAP-1) (Cerebroside sulfate activator) (CSAct) (Dispersin) (Sulfatide/GM1 activator); Saposin C (Co-beta- | SAP_HUMAN   | 58094  | LIDNNKTEKEILDADF           |  |  |  |  |  |  |  |  |  |  |  |  |  |  |  |  |
| (P07602) Proactivator polypeptide precursor<br>[Contains: Saposin A (Protein A); Saposin B-Val; Saposin B (Sphingolipid activator protein 1) (SAP-1) (Cerebroside sulfate activator) (CSAct) (Dispersin) (Sulfatide/GM1 activator); Saposin C (Co-beta- | SAP_HUMAN   | 58094  | NLEKNSTKQEILAALEK          |  |  |  |  |  |  |  |  |  |  |  |  |  |  |  |  |
| (P07602) Proactivator polypeptide precursor<br>[Contains: Saposin A (Protein A); Saposin B-Val; Saposin B (Sphingolipid activator protein 1) (SAP-1) (Cerebroside sulfate activator) (CSAct) (Dispersin) (Sulfatide/GM1 activator); Saposin C (Co-beta- | SAP_HUMAN   | 58094  | INSTKQEILAALEK             |  |  |  |  |  |  |  |  |  |  |  |  |  |  |  |  |
| (P07942) Laminin beta-1 chain precursor (Laminin B1 chain)                                                                                                                                                                                              | LAMB1_HUMAN | 198045 | VYASTTEPNSTVEQSALMR        |  |  |  |  |  |  |  |  |  |  |  |  |  |  |  |  |
| (P07942) Laminin beta-1 chain precursor (Laminin B1 chain)                                                                                                                                                                                              | LAMB1_HUMAN | 198045 | MEMPSTPQQQLNLTEDIR         |  |  |  |  |  |  |  |  |  |  |  |  |  |  |  |  |
| (P07996) Thrombospondin-1 precursor                                                                                                                                                                                                                     | TSP1_HUMAN  | 129394 | VVNSTTGPGEHLR              |  |  |  |  |  |  |  |  |  |  |  |  |  |  |  |  |
| (P08174) Complement decay-accelerating factor precursor (CD55 antigen)                                                                                                                                                                                  | DAF_HUMAN   | 41382  | GSQWSDIEEFCNR              |  |  |  |  |  |  |  |  |  |  |  |  |  |  |  |  |
| (P08195) 4F2 cell-surface antigen heavy chain (4F2hc) (Lymphocyte activation antigen 4F2 large subunit) (4F2 heavy chain antigen) (CD98 antigen)                                                                                                        | 4F2_HUMAN   | 57929  | DASSFLAEWQNTIK             |  |  |  |  |  |  |  |  |  |  |  |  |  |  |  |  |
| (P08195) 4F2 cell-surface antigen heavy chain (4F2hc) (Lymphocyte activation antigen 4F2 large subunit) (4F2 heavy chain antigen) (CD98 antigen)                                                                                                        | 4F2_HUMAN   | 57929  | LLIAGTNSDQQILSLLESNK       |  |  |  |  |  |  |  |  |  |  |  |  |  |  |  |  |
| (P08195) 4F2 cell-surface antigen heavy chain (4F2hc) (Lymphocyte activation antigen 4F2 large subunit) (4F2 heavy chain antigen) (CD98 antigen)                                                                                                        | 4F2_HUMAN   | 57929  | SLVTQYLNATGNR              |  |  |  |  |  |  |  |  |  |  |  |  |  |  |  |  |
| (P08236) Beta-glucuronidase precursor (EC 3.2.1.31) (Beta-G1)                                                                                                                                                                                           | BGLR_HUMAN  | 74699  | LLDAENKVVANGTGTGQGLK       |  |  |  |  |  |  |  |  |  |  |  |  |  |  |  |  |
| (P08236) Beta-glucuronidase precursor (EC 3.2.1.31) (Beta-G1)                                                                                                                                                                                           | BGLR_HUMAN  | 74699  | VVANGTGTGQGLK              |  |  |  |  |  |  |  |  |  |  |  |  |  |  |  |  |
| (P08236) Beta-glucuronidase precursor (EC 3.2.1.31) (Beta-G1)                                                                                                                                                                                           | BGLR_HUMAN  | 74699  | IANETRYPHSVAK              |  |  |  |  |  |  |  |  |  |  |  |  |  |  |  |  |
| (P08962) CD63 antigen (Melanoma-associated antigen ME491) (Lysosome-associated membrane glycoprotein 3) (LAMP-3) (Ocular melanoma-associated antigen) (OMA81H) (Granulophysin) (Tetraspanin-30) (Tspan-30)                                              | CD63_HUMAN  | 25487  | QQMENYPKNNHTASILDR         |  |  |  |  |  |  |  |  |  |  |  |  |  |  |  |  |
| (P08962) CD63 antigen (Melanoma-associated antigen ME491) (Lysosome-associated membrane glycoprotein 3) (LAMP-3) (Ocular melanoma-associated antigen) (OMA81H) (Granulophysin) (Tetraspanin-30) (Tspan-30)                                              | CD63_HUMAN  | 25487  | NNHTASILDR                 |  |  |  |  |  |  |  |  |  |  |  |  |  |  |  |  |
| (P08962) CD63 antigen (Melanoma-associated antigen ME491) (Lysosome-associated membrane glycoprotein 3) (LAMP-3) (Ocular melanoma-associated antigen) (OMA81H) (Granulophysin) (Tetraspanin-30) (Tspan-30)                                              | CD63_HUMAN  | 25487  | NNHTASILDR                 |  |  |  |  |  |  |  |  |  |  |  |  |  |  |  |  |





List of Glycopeptide Identified

|                                                                                                                                                                                                                                                      |             |        |                              |  |  |   |   |     |       |      |       |   |   |         |      |      |    |          |
|------------------------------------------------------------------------------------------------------------------------------------------------------------------------------------------------------------------------------------------------------|-------------|--------|------------------------------|--|--|---|---|-----|-------|------|-------|---|---|---------|------|------|----|----------|
| (P16070) CD44 antigen precursor (Phagocytic glycoprotein I) (PGP-1) (HUTCH-I) (Extracellular matrix receptor-III) (ECMR-III) (GP90 lymphocyte homing/adhesion receptor) (Hermes antigen) (Hyaluronate receptor) (Heparan sulfate proteoglycan) (Epi) | CD44_HUMAN  | 81535  |                              |  |  | K | A | 95% | 71.3  | 39.4 | 8.08  | 4 | 0 | 1585.72 | 55   | 68   | 57 |          |
| (P16278) Beta-galactosidase precursor (EC 3.2.1.23) (Lactase) (Acid beta-galactosidase)                                                                                                                                                              | BGAL_HUMAN  | 76076  | CGALQLGLYTTVDFGTGSNITDAFLSQR |  |  | K | K | 95% | 103.0 | 37.5 | 8.77  | 1 | 0 | 2893.37 | 230  | 256  |    | 247      |
| (P16278) Beta-galactosidase precursor (EC 3.2.1.23) (Lactase) (Acid beta-galactosidase)                                                                                                                                                              | BGAL_HUMAN  | 76076  | NNVITLNIITGK                 |  |  | R | A | 95% | 75.0  | 39.3 | 1.17  | 3 | 0 | 1187.66 | 458  | 468  |    | 464      |
| (P16422) Tumor-associated calcium signal transducer 1 precursor (Major gastrointestinal tumor-associated protein GA733-2) (Epithelial cell surface antigen) (Epithelial glycoprotein) (EGP) (Adenocarcinoma-associated antigen) (KSA) (KS 1/4 anti   | TACD1_HUMAN | 34902  | QCNGTSTCWCWNTAGVR            |  |  | K | R | 95% | 111.0 | 38.6 | 5.42  | 3 | 0 | 1971.81 | 109  | 125  |    | 111      |
| (P17050) Alpha-N-acetylgalactosaminidase precursor (EC 3.2.1.49) (Alpha-galactosidase B)                                                                                                                                                             | NAGAB_HUMAN | 46548  | LGIYADMGNFTCMGYPGTTLDK       |  |  | K | V | 95% | 86.3  | 38.3 | 9.00  | 1 | 0 | 2442.07 | 116  | 137  |    | 124      |
| (P17050) Alpha-N-acetylgalactosaminidase precursor (EC 3.2.1.49) (Alpha-galactosidase B)                                                                                                                                                             | NAGAB_HUMAN | 46548  | VNYSLLADICNLWR               |  |  | R | N | 95% | 62.9  | 38.4 | 4.34  | 2 | 0 | 1737.86 | 200  | 213  |    | 201      |
| (P17301) Integrin alpha-2 precursor (Platelet membrane glycoprotein Ia) (GPIa) (Collagen receptor) (VLA-2 alpha chain) (CD49b antigen)                                                                                                               | ITA2_HUMAN  | 129280 | LNLTQTSIPNVTEMK              |  |  | K | T | 95% | 85.5  | 38.9 | 5.92  | 2 | 0 | 1792.90 | 95   | 110  |    | 105      |
| (P17301) Integrin alpha-2 precursor (Platelet membrane glycoprotein Ia) (GPIa) (Collagen receptor) (VLA-2 alpha chain) (CD49b antigen)                                                                                                               | ITA2_HUMAN  | 129280 | TNMSLGLILTR                  |  |  | K | N | 95% | 66.8  | 39.0 | 3.43  | 1 | 0 | 1235.67 | 111  | 121  |    | 112      |
| (P17301) Integrin alpha-2 precursor (Platelet membrane glycoprotein Ia) (GPIa) (Collagen receptor) (VLA-2 alpha chain) (CD49b antigen)                                                                                                               | ITA2_HUMAN  | 129280 | YFFNVSDAEALLEK               |  |  | R | A | 95% | 94.9  | 39.4 | 10.60 | 2 | 0 | 1646.80 | 340  | 353  |    | 343      |
| (P17301) Integrin alpha-2 precursor (Platelet membrane glycoprotein Ia) (GPIa) (Collagen receptor) (VLA-2 alpha chain) (CD49b antigen)                                                                                                               | ITA2_HUMAN  | 129280 | ANVTGIVLYSVNENGNITVIOAHR     |  |  | R | G | 95% | 92.1  | 38.8 | 5.55  | 0 | 1 | 2777.37 | 459  | 483  |    | 460, 475 |
| (P17301) Integrin alpha-2 precursor (Platelet membrane glycoprotein Ia) (GPIa) (Collagen receptor) (VLA-2 alpha chain) (CD49b antigen)                                                                                                               | ITA2_HUMAN  | 129280 | TASCSNVTCWLK                 |  |  | R | D | 95% | 64.0  | 39.4 | 3.15  | 1 | 0 | 1427.63 | 1052 | 1063 |    | 1057     |
| (P17301) Integrin alpha-2 precursor (Platelet membrane glycoprotein Ia) (GPIa) (Collagen receptor) (VLA-2 alpha chain) (CD49b antigen)                                                                                                               | ITA2_HUMAN  | 129280 | GEYFVNVITTR                  |  |  | K | I | 95% | 60.9  | 38.9 | 2.54  | 2 | 0 | 1186.57 | 1069 | 1078 |    | 1074     |
| (P18084) Integrin beta-5 precursor                                                                                                                                                                                                                   | ITB5_HUMAN  | 88037  | IYGFPCEDNFSCAR               |  |  | K | N | 95% | 66.5  | 38.4 | 2.20  | 1 | 0 | 1896.74 | 543  | 557  |    | 552      |
| (P18084) Integrin beta-5 precursor                                                                                                                                                                                                                   | ITB5_HUMAN  | 88037  | CHAGYIGDNCNCSTDISTCR         |  |  | K | G | 95% | 0.0   | 0.0  | 9.37  | 1 | 0 | 2344.87 | 576  | 595  |    | 586      |
| (P19075) Tetraspanin-8 (Tspan-8) (Transmembrane 4 superfamily member 3) (Tumor-associated antigen CO-029)                                                                                                                                            | TSN8_HUMAN  | 26027  | SDRIVNETLYENTK               |  |  | K | L | 95% | 62.7  | 39.1 | 9.23  | 2 | 0 | 1682.82 | 113  | 126  |    | 118      |
| (P19075) Tetraspanin-8 (Tspan-8) (Transmembrane 4 superfamily member 3) (Tumor-associated antigen CO-029)                                                                                                                                            | TSN8_HUMAN  | 26027  | IVNETLYENTK                  |  |  | R | L | 95% | 99.9  | 38.8 | 3.03  | 4 | 0 | 1325.65 | 116  | 126  |    | 118      |
| (P19440) Gamma-glutamyltranspeptidase 1 precursor (EC 2.3.2.2) (Gamma-glutamyltransferase 1) (CD224 antigen) [Contains: Gamma-glutamyltranspeptidase 1 heavy chain; Gamma-glutamyltranspeptidase 1 light chain]                                      | GGT1_HUMAN  | 61393  | LAFATMFNSSEQSQK              |  |  | R | G | 95% | 64.0  | 38.6 | 3.92  | 2 | 0 | 1705.77 | 113  | 127  |    | 120      |
| (P21589) 5'-nucleotidase precursor (EC 3.1.3.5) (Ecto-5'-nucleotidase) (5'-NT) (CD73 antigen)                                                                                                                                                        | 5NTD_HUMAN  | 63351  | IKLDNYSTQELGK                |  |  | R | T | 95% | 59.9  | 39.1 | 5.82  | 2 | 0 | 1509.78 | 329  | 341  |    | 333      |
| (P23229) Integrin alpha-6 precursor (VLA-6) (CD49f antigen) [Contains: Integrin alpha-6 heavy chain; Integrin alpha-6 light chain]                                                                                                                   | ITA6_HUMAN  | 126604 | QLSCVANQNGSQADCELGPNFK       |  |  | K | R | 95% | 59.5  | 37.9 | 3.43  | 1 | 0 | 2439.06 | 762  | 783  |    | 770      |
| (P26006) Integrin alpha-3 precursor (Galactoprotein B3) (GAPB3) (VLA-3 alpha chain) (FRP-2) (CD49c antigen) [Contains: Integrin alpha-3 heavy chain; Integrin alpha-3 light chain]                                                                   | ITA3_HUMAN  | 118682 | NITIVTGAPR                   |  |  | K | H | 95% | 61.4  | 39.1 | 2.33  | 2 | 0 | 1042.59 | 265  | 274  |    | 265      |
| (P26006) Integrin alpha-3 precursor (Galactoprotein B3) (GAPB3) (VLA-3 alpha chain) (FRP-2) (CD49c antigen) [Contains: Integrin alpha-3 heavy chain; Integrin alpha-3 light chain]                                                                   | ITA3_HUMAN  | 118682 | SLDAYPILNQAQALENHTEVQFOK     |  |  | R | E | 95% | 64.1  | 39.0 | 2.59  | 0 | 2 | 2759.35 | 590  | 613  |    | 605      |
| (P26006) Integrin alpha-3 precursor (Galactoprotein B3) (GAPB3) (VLA-3 alpha chain) (FRP-2) (CD49c antigen) [Contains: Integrin alpha-3 heavy chain; Integrin alpha-3 light chain]                                                                   | ITA3_HUMAN  | 118682 | VWNSTFIEDYR                  |  |  | R | D | 95% | 83.9  | 39.6 | 6.17  | 1 | 0 | 1430.66 | 933  | 943  |    | 935      |
| (P27487) Dipeptidyl peptidase 4 (EC 3.4.14.5) (Dipeptidyl peptidase IV) (DPP IV) (T-cell activation antigen CD26) (TP103) (Adenosine deaminase complexing protein 2) (ADABP) [Contains: Dipeptidyl peptidase 4 membrane form (Dipeptidyl peptidase   | DPP4_HUMAN  | 88263  | IPNNTQVWTVWSPVGHK            |  |  | R | L | 95% | 84.2  | 38.6 | 4.32  | 2 | 1 | 1864.93 | 148  | 163  |    | 150      |
| (P27487) Dipeptidyl peptidase 4 (EC 3.4.14.5) (Dipeptidyl peptidase IV) (DPP IV) (T-cell activation antigen CD26) (TP103) (Adenosine deaminase complexing protein 2) (ADABP) [Contains: Dipeptidyl peptidase 4 membrane form (Dipeptidyl peptidase   | DPP4_HUMAN  | 88263  | IQNYSVMDICDYDESSGR           |  |  | R | W | 95% | 124.0 | 38.5 | 5.12  | 3 | 0 | 2152.88 | 319  | 336  |    | 321      |

List of Glycopeptide Identified

|                                                                                                                                                                                                                                                      |             |        |  |  |   |   |     |       |      |       |   |   |         |     |     |          |
|------------------------------------------------------------------------------------------------------------------------------------------------------------------------------------------------------------------------------------------------------|-------------|--------|--|--|---|---|-----|-------|------|-------|---|---|---------|-----|-----|----------|
| (P27487) Dipeptidyl peptidase 4 (EC 3.4.14.5) (Dipeptidyl peptidase IV) (DPP IV) (T-cell activation antigen CD26) (TP103) (Adenosine deaminase complexing protein 2) (ADABP) [Contains: Dipeptidyl peptidase 4 membrane form (Dipeptidyl peptidase)] | DPP4_HUMAN  | 88263  |  |  | K | F | 95% | 93.6  | 38.7 | 4.80  | 1 | 0 | 1334.76 | 513 | 523 | 520      |
| (P27487) Dipeptidyl peptidase 4 (EC 3.4.14.5) (Dipeptidyl peptidase IV) (DPP IV) (T-cell activation antigen CD26) (TP103) (Adenosine deaminase complexing protein 2) (ADABP) [Contains: Dipeptidyl peptidase 4 membrane form (Dipeptidyl peptidase)] | DPP4_HUMAN  | 88263  |  |  | K | F | 95% | 63.4  | 38.8 | 3.15  | 2 | 0 | 1206.66 | 514 | 523 | 520      |
| (P27701) CD82 antigen (Inducible membrane protein R2) (C33 antigen) (IA4) (Metastasis suppressor Kangai 1) (Suppressor of tumorigenicity-6) (Tetraspanin-27) (Tspan-27)                                                                              | CD82_HUMAN  | 29608  |  |  | R | C | 95% | 53.1  | 38.8 | 8.96  | 0 | 1 | 2618.16 | 127 | 148 | 129      |
| (P28799) Granulins precursor (Proepithelin) (PEPI) [Contains: Acrogranin; Paragranulin; Granulin-1 (Granulin G); Granulin-2 (Granulin F); Granulin-3 (Granulin B); Granulin-4 (Granulin A); Granulin-5 (Granulin C); Granulin-6 (Granulin D); Granul | GRN_HUMAN   | 63522  |  |  | K | C | 95% | 57.6  | 38.0 | 4.32  | 0 | 1 | 3801.47 | 229 | 259 | 236      |
| (P28799) Granulins precursor (Proepithelin) (PEPI) [Contains: Acrogranin; Paragranulin; Granulin-1 (Granulin G); Granulin-2 (Granulin F); Granulin-3 (Granulin B); Granulin-4 (Granulin A); Granulin-5 (Granulin C); Granulin-6 (Granulin D); Granul | GRN_HUMAN   | 63522  |  |  | K | L | 95% | 0.0   | 0.0  | 3.31  | 1 | 0 | 1576.79 | 260 | 273 | 265      |
| (P29323) Ephrin type-B receptor 2 precursor (EC 2.7.10.1) (Tyrosine-protein kinase receptor EPH-3) (DRT) (Receptor protein-tyrosine kinase HEK5) (ERK) (NY-REN-47 antigen)                                                                           | EPHB2_HUMAN | 117476 |  |  | K | G | 95% | 66.6  | 38.6 | 7.21  | 1 | 0 | 1410.63 | 258 | 270 | 265      |
| (P34059) N-acetylgalactosamine-6-sulfatase precursor (EC 3.1.6.4) (N-acetylgalactosamine-6-sulfate sulfatase) (Galactose-6-sulfate sulfatase) (GalNAc6S sulfatase) (Chondroitinsulfatase) (Chondroitinase)                                           | GALNS_HUMAN | 58009  |  |  | K | Q | 95% | 104.0 | 38.3 | 5.80  | 1 | 1 | 2324.21 | 200 | 219 | 204      |
| (P34059) N-acetylgalactosamine-6-sulfatase precursor (EC 3.1.6.4) (N-acetylgalactosamine-6-sulfate sulfatase) (Galactose-6-sulfate sulfatase) (GalNAc6S sulfatase) (Chondroitinsulfatase) (Chondroitinase)                                           | GALNS_HUMAN | 58009  |  |  | R | L | 95% | 0.0   | 0.0  | 3.72  | 1 | 0 | 2638.18 | 414 | 437 | 423      |
| (P35613) Basigin precursor (Leukocyte activation antigen M6) (Collagenase stimulatory factor) (Extracellular matrix metalloproteinase inducer) (EMMPRIN) (5F7) (Tumor cell-derived collagenase stimulatory factor) (TCSF) (OK blood group antigen)   | BASI_HUMAN  | 42182  |  |  | K | W | 95% | 124.0 | 38.8 | 5.04  | 2 | 2 | 1987.98 | 153 | 170 | 160      |
| (P35613) Basigin precursor (Leukocyte activation antigen M6) (Collagenase stimulatory factor) (Extracellular matrix metalloproteinase inducer) (EMMPRIN) (5F7) (Tumor cell-derived collagenase stimulatory factor) (TCSF) (OK blood group antigen)   | BASI_HUMAN  | 42182  |  |  | K | F | 95% | 79.2  | 38.6 | 4.66  | 3 | 3 | 1769.79 | 258 | 273 | 268      |
| (P36955) Pigment epithelium-derived factor precursor (PEDF) (EPC-1)                                                                                                                                                                                  | PEDF_HUMAN  | 46326  |  |  | K | E | 95% | 74.3  | 39.1 | 3.80  | 0 | 2 | 2574.29 | 282 | 303 | 285      |
| (P43251) Biotinidase precursor (EC 3.5.1.12)                                                                                                                                                                                                         | BTD_HUMAN   | 58896  |  |  | K | T | 95% | 98.7  | 38.5 | 6.15  | 1 | 0 | 2205.10 | 84  | 102 | 99       |
| (P43251) Biotinidase precursor (EC 3.5.1.12)                                                                                                                                                                                                         | BTD_HUMAN   | 58896  |  |  | R | L | 95% | 51.7  | 38.5 | 1.00  | 1 | 0 | 1122.54 | 129 | 137 | 130      |
| (P43251) Biotinidase precursor (EC 3.5.1.12)                                                                                                                                                                                                         | BTD_HUMAN   | 58896  |  |  | R | Y | 95% | 85.5  | 38.9 | 4.41  | 1 | 0 | 2089.00 | 172 | 189 | 183      |
| (P43251) Biotinidase precursor (EC 3.5.1.12)                                                                                                                                                                                                         | BTD_HUMAN   | 58896  |  |  | K | F | 95% | 133.0 | 38.3 | 8.27  | 2 | 2 | 2094.99 | 320 | 340 | 329      |
| (P48960) CD97 antigen precursor (Leukocyte antigen CD97)                                                                                                                                                                                             | CD97_HUMAN  | 91852  |  |  | R | C | 95% | 63.3  | 38.5 | 5.10  | 1 | 0 | 1811.73 | 29  | 43  | 33, 38   |
| (P50895) Lutheran blood group glycoprotein precursor (B-CAM cell surface glycoprotein) (Auberger B antigen) (F8/G253 antigen)                                                                                                                        | LU_HUMAN    | 67386  |  |  | K | W | 95% | 99.3  | 38.2 | 6.26  | 3 | 0 | 2603.39 | 371 | 395 | 377, 383 |
| (P50895) Lutheran blood group glycoprotein precursor (B-CAM cell surface glycoprotein) (Auberger B antigen) (F8/G253 antigen)                                                                                                                        | LU_HUMAN    | 67386  |  |  | R | T | 95% | 48.5  | 39.2 | 3.96  | 1 | 0 | 1675.89 | 437 | 451 | 439      |
| (P50897) Palmitoyl-protein thioesterase 1 precursor (EC 3.1.2.22) (Palmitoyl-protein hydrolase 1)                                                                                                                                                    | PPT1_HUMAN  | 34176  |  |  | R | G | 95% | 74.8  | 39.0 | 4.80  | 1 | 0 | 1557.77 | 197 | 209 | 197      |
| (P50897) Palmitoyl-protein thioesterase 1 precursor (EC 3.1.2.22) (Palmitoyl-protein hydrolase 1)                                                                                                                                                    | PPT1_HUMAN  | 34176  |  |  | K | S | 95% | 85.6  | 38.6 | 11.00 | 1 | 0 | 2307.06 | 230 | 248 | 232      |
| (P51688) N-sulphoglucosamine sulphohydrolase precursor (EC 3.10.1.1) (Sulfo-glucosamine sulfamidase) (Sulphamidase)                                                                                                                                  | SPHM_HUMAN  | 56678  |  |  | R | R | 95% | 192.0 | 38.6 | 11.10 | 0 | 2 | 3272.61 | 24  | 55  | 41       |
| (P52799) Ephrin-B2 precursor (EPH-related receptor tyrosine kinase ligand 5) (LERK-5) (HTK ligand) (HTK-L)                                                                                                                                           | EFNB2_HUMAN | 36906  |  |  | K | A | 95% | 91.3  | 38.4 | 8.30  | 0 | 2 | 3120.41 | 129 | 156 | 139      |
| (P53634) Dipeptidyl-peptidase 1 precursor (EC 3.4.14.1) (Dipeptidyl-peptidase I) (DPP-I) (DPPI) (Cathepsin C) (Cathepsin J) (Dipeptidyl transferase) [Contains: Dipeptidyl-peptidase 1 exclusion domain chain (Dipeptidyl-peptidase I exclusion dom  | CATC_HUMAN  | 51824  |  |  | R | K | 95% | 67.3  | 39.1 | 2.46  | 6 | 0 | 1380.58 | 51  | 62  | 53       |

List of Glycopeptide Identified

|                                                                                                                                                                                                                                                     |             |        |  |  |  |   |   |     |       |      |       |   |   |         |     |     |     |          |
|-----------------------------------------------------------------------------------------------------------------------------------------------------------------------------------------------------------------------------------------------------|-------------|--------|--|--|--|---|---|-----|-------|------|-------|---|---|---------|-----|-----|-----|----------|
| (P53634) Dipeptidyl-peptidase 1 precursor (EC 3.4.14.1) (Dipeptidyl-peptidase I) (DPP-I) (DPPI) (Cathepsin C) (Cathepsin J) (Dipeptidyl transferase) [Contains: Dipeptidyl-peptidase 1 exclusion domain chain (Dipeptidyl-peptidase I exclusion dom | CATC_HUMAN  | 51824  |  |  |  | K | N | 95% | 91.4  | 38.2 | 5.82  | 2 | 1 | 2256.01 | 114 | 132 | 119 |          |
| (P54753) Ephrin type-B receptor 3 precursor (EC 2.7.10.1) (Tyrosine-protein kinase receptor HEK-2)                                                                                                                                                  | EPHB3_HUMAN | 110313 |  |  |  | R | L | 95% | 87.9  | 39.0 | 5.59  | 1 | 0 | 2117.09 | 441 | 460 |     | 445      |
| (P55011) Solute carrier family 12 member 2 (Bumetanide-sensitive sodium-(potassium)-chloride cotransporter 1) (Basolateral Na-K-Cl symporter)                                                                                                       | S12A2_HUMAN | 131434 |  |  |  | R | L | 95% | 142.0 | 38.1 | 10.30 | 2 | 0 | 2457.08 | 547 | 569 |     | 553, 562 |
| (P56199) Integrin alpha-1 (Laminin and collagen receptor) (VLA-1) (CD49a antigen)                                                                                                                                                                   | ITA1_HUMAN  | 127823 |  |  |  | R | M | 95% | 40.8  | 38.7 | 1.48  | 1 | 0 | 1364.70 | 459 | 469 |     | 460      |
| (P56199) Integrin alpha-1 (Laminin and collagen receptor) (VLA-1) (CD49a antigen)                                                                                                                                                                   | ITA1_HUMAN  | 127823 |  |  |  | K | F | 95% | 70.9  | 38.8 | 3.21  | 1 | 0 | 1227.64 | 526 | 535 | 532 |          |
| (P61916) Epididymal secretory protein E1 precursor (Niemann-Pick disease type C2 protein) (hE1)                                                                                                                                                     | NPC2_HUMAN  | 16552  |  |  |  | K | G | 95% | 51.2  | 39.0 | 1.54  | 1 | 0 | 1843.87 | 36  | 51  |     | 39       |
| (P61916) Epididymal secretory protein E1 precursor (Niemann-Pick disease type C2 protein) (hE1)                                                                                                                                                     | NPC2_HUMAN  | 16552  |  |  |  | K | S | 95% | 57.1  | 38.6 | 5.62  | 3 | 0 | 1860.90 | 52  | 68  |     | 58       |
| (P80188) Neutrophil gelatinase-associated lipocalin precursor (NGAL) (p25) (25 kDa alpha-2-microglobulin-related subunit of MMP-9) (Lipocalin-2) (Oncogene 24p3)                                                                                    | NGAL_HUMAN  | 22571  |  |  |  | K | K | 95% | 67.2  | 38.8 | 5.49  | 2 | 0 | 1186.61 | 83  | 92  | 85  |          |
| (P98160) Basement membrane-specific heparan sulfate proteoglycan core protein precursor (HSPG) (Perlecan) (PLC)                                                                                                                                     | PGBM_HUMAN  | 468788 |  |  |  | R | S | 95% | 43.7  | 38.7 | 2.49  | 1 | 0 | 821.45  | 86  | 92  |     | 89       |
| (P98172) Ephrin-B1 precursor (EPH-related receptor tyrosine kinase ligand 2) (LERK-2) (ELK ligand) (ELK-L)                                                                                                                                          | EFNB1_HUMAN | 37989  |  |  |  | K | E | 95% | 91.8  | 38.6 | 5.06  | 0 | 1 | 2422.13 | 128 | 148 |     | 139      |
| (Q02487) Desmocollin-2 precursor (Desmosomal glycoprotein II and III) (Desmocollin-3)                                                                                                                                                               | DSC2_HUMAN  | 99945  |  |  |  | K | T | 95% | 50.0  | 38.6 | 5.28  | 1 | 0 | 1679.82 | 542 | 557 | 546 |          |
| (Q02809) Procollagen-lysine,2-oxoglutarate 5-dioxygenase 1 precursor (EC 1.14.11.4) (Lysyl hydroxylase 1) (LH1)                                                                                                                                     | PLOD1_HUMAN | 83535  |  |  |  | R | C | 95% | 38.3  | 38.6 | 4.85  | 1 | 0 | 1239.63 | 194 | 203 |     | 197      |
| (Q08380) Galectin-3-binding protein precursor (Lectin galactoside-binding soluble 3-binding protein) (Mac-2-binding protein) (Mac-2 BP) (MAC2BP) (Tumor-associated antigen 90K)                                                                     | LG3BP_HUMAN | 65314  |  |  |  | R | A | 95% | 83.8  | 39.1 | 3.00  | 1 | 0 | 1348.69 | 64  | 76  | 69  |          |
| (Q08380) Galectin-3-binding protein precursor (Lectin galactoside-binding soluble 3-binding protein) (Mac-2-binding protein) (Mac-2 BP) (MAC2BP) (Tumor-associated antigen 90K)                                                                     | LG3BP_HUMAN | 65314  |  |  |  | R | S | 95% | 68.8  | 38.8 | 2.96  | 1 | 0 | 1222.54 | 118 | 128 | 125 |          |
| (Q08380) Galectin-3-binding protein precursor (Lectin galactoside-binding soluble 3-binding protein) (Mac-2-binding protein) (Mac-2 BP) (MAC2BP) (Tumor-associated antigen 90K)                                                                     | LG3BP_HUMAN | 65314  |  |  |  | K | D | 95% | 97.4  | 38.3 | 8.03  | 4 | 2 | 2094.91 | 188 | 206 | 192 |          |
| (Q08380) Galectin-3-binding protein precursor (Lectin galactoside-binding soluble 3-binding protein) (Mac-2-binding protein) (Mac-2 BP) (MAC2BP) (Tumor-associated antigen 90K)                                                                     | LG3BP_HUMAN | 65314  |  |  |  | R | I | 95% | 73.0  | 38.8 | 9.39  | 2 | 2 | 1698.87 | 394 | 407 | 398 |          |
| (Q08380) Galectin-3-binding protein precursor (Lectin galactoside-binding soluble 3-binding protein) (Mac-2-binding protein) (Mac-2 BP) (MAC2BP) (Tumor-associated antigen 90K)                                                                     | LG3BP_HUMAN | 65314  |  |  |  | K | I | 95% | 71.7  | 39.2 | 3.72  | 2 | 0 | 1407.71 | 396 | 407 | 398 |          |
| (Q08380) Galectin-3-binding protein precursor (Lectin galactoside-binding soluble 3-binding protein) (Mac-2-binding protein) (Mac-2 BP) (MAC2BP) (Tumor-associated antigen 90K)                                                                     | LG3BP_HUMAN | 65314  |  |  |  | K | S | 95% | 90.8  | 38.7 | 4.35  | 1 | 0 | 1275.64 | 542 | 554 | 551 |          |
| (Q08380) Galectin-3-binding protein precursor (Lectin galactoside-binding soluble 3-binding protein) (Mac-2-binding protein) (Mac-2 BP) (MAC2BP) (Tumor-associated antigen 90K)                                                                     | LG3BP_HUMAN | 65314  |  |  |  | R | - | 95% | 65.0  | 39.2 | 5.02  | 2 | 0 | 1669.84 | 571 | 585 | 580 |          |
| (Q08431) Lactadherin precursor (Milk fat globule-EGF factor 8) (MFG-E8) (HMFG) (Breast epithelial antigen BA46) (MFGM) [Contains: Lactadherin short form; Medin]                                                                                    | MFGM_HUMAN  | 43105  |  |  |  | K | T | 95% | 105.0 | 38.6 | 4.51  | 1 | 0 | 2016.86 | 321 | 337 |     | 325      |
| (Q08722) Leukocyte surface antigen CD47 precursor (Integrin-associated protein) (IAP) (Antigenic surface determinant protein OA3) (MER6)                                                                                                            | CD47_HUMAN  | 35197  |  |  |  | R | S | 95% | 62.6  | 38.9 | 2.70  | 2 | 0 | 1257.60 | 64  | 74  | 73  |          |
| (Q08722) Leukocyte surface antigen CD47 precursor (Integrin-associated protein) (IAP) (Antigenic surface determinant protein OA3) (MER6)                                                                                                            | CD47_HUMAN  | 35197  |  |  |  | K | E | 95% | 90.8  | 38.6 | 9.46  | 1 | 0 | 2140.95 | 103 | 121 | 111 |          |
| (Q13308) Tyrosine-protein kinase-like 7 precursor (Colon carcinoma kinase 4) (CCK-4)                                                                                                                                                                | PTK7_HUMAN  | 118243 |  |  |  | R | K | 95% | 70.6  | 38.7 | 5.85  | 1 | 0 | 1828.00 | 401 | 416 |     | 405      |
| (Q13308) Tyrosine-protein kinase-like 7 precursor (Colon carcinoma kinase 4) (CCK-4)                                                                                                                                                                | PTK7_HUMAN  | 118243 |  |  |  | R | A | 95% | 73.9  | 39.0 | 6.74  | 1 | 0 | 2038.88 | 563 | 581 |     | 567      |
| (Q13433) Zinc transporter SLC39A6 precursor (Solute carrier family 39 member 6) (Estrogen-regulated protein LIV-1)                                                                                                                                  | S39A6_HUMAN | 84265  |  |  |  | R | K | 95% | 57.0  | 38.9 | 3.44  | 1 | 0 | 1472.67 | 64  | 76  |     | 67       |



List of Glycopeptide Identified

|                                                                                                                                                                                                                                                    |             |        |  |  |  |                                                     |   |   |     |       |      |       |   |   |         |      |      |      |
|----------------------------------------------------------------------------------------------------------------------------------------------------------------------------------------------------------------------------------------------------|-------------|--------|--|--|--|-----------------------------------------------------|---|---|-----|-------|------|-------|---|---|---------|------|------|------|
| (Q13510) Acid ceramidase precursor (EC 3.5.1.23) (Acylsphingosine deacylase) (N-acylsphingosine amidohydrolase) (AC) (Putative 32 kDa heart protein) (PHP32) [Contains: Acid ceramidase alpha subunit; Acid ceramidase beta subunit]               | ASAH1_HUMAN | 44633  |  |  |  | TVLENSTSYEEAK                                       | R | N | 95% | 98.3  | 38.7 | 3.24  | 1 | 0 | 1471.68 | 255  | 267  | 259  |
| (Q13510) Acid ceramidase precursor (EC 3.5.1.23) (Acylsphingosine deacylase) (N-acylsphingosine amidohydrolase) (AC) (Putative 32 kDa heart protein) (PHP32) [Contains: Acid ceramidase alpha subunit; Acid ceramidase beta subunit]               | ASAH1_HUMAN | 44633  |  |  |  | TVLENSTSYEEAKNLLTK                                  | R | T | 95% | 104.0 | 38.8 | 8.12  | 2 | 1 | 2041.03 | 255  | 272  | 259  |
| (Q13510) Acid ceramidase precursor (EC 3.5.1.23) (Acylsphingosine deacylase) (N-acylsphingosine amidohydrolase) (AC) (Putative 32 kDa heart protein) (PHP32) [Contains: Acid ceramidase alpha subunit; Acid ceramidase beta subunit]               | ASAH1_HUMAN | 44633  |  |  |  | ILAPAYFILGGNQS <del>G</del> EGCVITR                 | K | D | 95% | 118.0 | 38.7 | 8.15  | 1 | 0 | 2337.19 | 275  | 296  | 286  |
| (Q13641) Trophoblast glycoprotein precursor (5T4 oncofetal trophoblast glycoprotein) (5T4 oncotrophoblast glycoprotein) (5T4 oncofetal antigen) (M6P1)                                                                                             | TPBG_HUMAN  | 46015  |  |  |  | RPPLAELAALNLSGSR                                    | R | L | 95% | 57.2  | 38.7 | 4.57  | 1 | 0 | 1665.93 | 114  | 129  | 124  |
| (Q13740) CD166 antigen precursor (Activated leukocyte-cell adhesion molecule) (ALCAM)                                                                                                                                                              | CD166_HUMAN | 65116  |  |  |  | IIISPEENVTLTCTAENQLER                               | K | T | 95% | 95.2  | 38.3 | 9.46  | 1 | 0 | 2431.20 | 473  | 493  | 480  |
| (Q13753) Laminin gamma-2 chain precursor (Laminin 5 gamma 2 subunit) (Kalinin/nicein/epiligrin 100 kDa subunit) (Laminin B21 chain) (Cell-scattering factor 140 kDa subunit) (CSF 140 kDa subunit) (Large adhesive scatter factor 140 kDa subunit) | LAMC2_HUMAN | 130958 |  |  |  | AQEALSMGNATFYEVESILK                                | R | N | 95% | 120.0 | 38.8 | 8.27  | 1 | 0 | 2218.06 | 934  | 953  | 942  |
| (Q14108) Lysosome membrane protein 2 (Lysosome membrane protein II) (LIMP II) (Scavenger receptor class B member 2) (85 kDa lysosomal membrane sialoglycoprotein) (LGP85) (CD36 antigen-like 2)                                                    | SCRB2_HUMAN | 54143  |  |  |  | ANIQFGDNGTTISAVSNK                                  | K | A | 95% | 93.6  | 38.6 | 8.57  | 1 | 0 | 1837.89 | 97   | 114  | 105  |
| (Q14108) Lysosome membrane protein 2 (Lysosome membrane protein II) (LIMP II) (Scavenger receptor class B member 2) (85 kDa lysosomal membrane sialoglycoprotein) (LGP85) (CD36 antigen-like 2)                                                    | SCRB2_HUMAN | 54143  |  |  |  | CNMINGTDGDSFHPLITK                                  | K | D | 95% | 65.4  | 38.9 | 6.44  | 1 | 0 | 2019.93 | 244  | 261  | 249  |
| (Q14126) Desmoglein-2 precursor (HDGC)                                                                                                                                                                                                             | DSG2_HUMAN  | 122367 |  |  |  | INATDADEPNTLNSK                                     | K | I | 95% | 84.9  | 38.8 | 4.24  | 1 | 0 | 1603.75 | 181  | 195  | 182  |
| (Q15223) Poliovirus receptor-related protein 1 precursor (Herpes virus entry mediator C) (HveC) (Nectin-1) (Herpesvirus Ig-like receptor) (HlgR) (CD111 antigen)                                                                                   | PVRL1_HUMAN | 57140  |  |  |  | NPNGTVTVISR                                         | R | Y | 95% | 64.9  | 38.9 | 2.85  | 2 | 0 | 1158.61 | 200  | 210  | 202  |
| (Q15262) Receptor-type tyrosine-protein phosphatase kappa precursor (EC 3.1.3.48) (Protein tyrosine phosphatase kappa) (R-PTP-kappa)                                                                                                               | PTPRK_HUMAN | 162071 |  |  |  | GPLANPIWNVVTGFTGR                                   | K | D | 95% | 65.4  | 39.0 | 5.77  | 1 | 0 | 1700.88 | 132  | 147  | 140  |
| (Q15262) Receptor-type tyrosine-protein phosphatase kappa precursor (EC 3.1.3.48) (Protein tyrosine phosphatase kappa) (R-PTP-kappa)                                                                                                               | PTPRK_HUMAN | 162071 |  |  |  | LGDEVEVNAQGNATFQCIIATGR                             | R | D | 95% | 51.3  | 38.7 | 5.00  | 1 | 0 | 2223.04 | 201  | 221  | 211  |
| (Q15758) Neutral amino acid transporter B(0) (ATB(0)) (Sodium-dependent neutral amino acid transporter type 2) (RD114/simian type D retrovirus receptor) (Baboon M7 virus receptor)                                                                | AAAT_HUMAN  | 56582  |  |  |  | SYSTTYEERNITGR                                      | R | V | 95% | 50.7  | 38.7 | 2.57  | 1 | 0 | 1778.82 | 203  | 217  | 212  |
| (Q16563) Synaptophysin-like protein 1 (Pantophysin)                                                                                                                                                                                                | SYPL1_HUMAN | 28548  |  |  |  | GQTEIQVNCPPAVTENK                                   | K | T | 95% | 101.0 | 38.9 | 5.21  | 1 | 0 | 1885.90 | 56   | 72   | 71   |
| (Q16787) Laminin alpha-3 chain precursor (Epiligrin 170 kDa subunit) (E170) (Nicein alpha subunit)                                                                                                                                                 | LAMA3_HUMAN | 189291 |  |  |  | EVIDNTLTLR                                          | K | D | 95% | 72.5  | 39.2 | 7.89  | 2 | 0 | 1275.68 | 640  | 650  | 645  |
| (Q16787) Laminin alpha-3 chain precursor (Epiligrin 170 kDa subunit) (E170) (Nicein alpha subunit)                                                                                                                                                 | LAMA3_HUMAN | 189291 |  |  |  | KIESINQQLPLGNISDNMDR                                | R | I | 95% | 57.8  | 39.2 | 7.15  | 0 | 1 | 2416.20 | 732  | 752  | 745  |
| (Q16787) Laminin alpha-3 chain precursor (Epiligrin 170 kDa subunit) (E170) (Nicein alpha subunit)                                                                                                                                                 | LAMA3_HUMAN | 189291 |  |  |  | TFNLNTEVEPCR                                        | K | R | 95% | 53.1  | 38.6 | 2.77  | 1 | 0 | 1581.72 | 960  | 972  | 964  |
| (Q16787) Laminin alpha-3 chain precursor (Epiligrin 170 kDa subunit) (E170) (Nicein alpha subunit)                                                                                                                                                 | LAMA3_HUMAN | 189291 |  |  |  | FNISTPAFR                                           | R | G | 95% | 32.2  | 38.4 | 3.52  | 1 | 0 | 1053.54 | 1107 | 1115 | 1108 |
| (Q16787) Laminin alpha-3 chain precursor (Epiligrin 170 kDa subunit) (E170) (Nicein alpha subunit)                                                                                                                                                 | LAMA3_HUMAN | 189291 |  |  |  | EGSLPGNSTISIR                                       | R | A | 95% | 27.7  | 39.3 | 4.15  | 1 | 0 | 1331.68 | 1471 | 1483 | 1477 |
| (Q5ZPR3) CD276 antigen precursor (Costimulatory molecule) (B7 homolog 3) (B7-H3) (4lg-B7-H3)                                                                                                                                                       | CD276_HUMAN | 57216  |  |  |  | QLVHSFAEGDQGSAYANR                                  | K | T | 95% | 0.0   | 0.0  | 11.20 | 1 | 0 | 2061.93 | 74   | 92   | 91   |
| (Q5ZPR3) CD276 antigen precursor (Costimulatory molecule) (B7 homolog 3) (B7-H3) (4lg-B7-H3)                                                                                                                                                       | CD276_HUMAN | 57216  |  |  |  | TALFPDLLAQGNASLR                                    | R | L | 95% | 99.1  | 39.2 | 9.17  | 2 | 0 | 1687.90 | 93   | 108  | 104  |
| (Q5ZPR3) CD276 antigen precursor (Costimulatory molecule) (B7 homolog 3) (B7-H3) (4lg-B7-H3)                                                                                                                                                       | CD276_HUMAN | 57216  |  |  |  | VVLGAN <del>G</del> TYSC <del>L</del> VR            | R | N | 95% | 95.4  | 38.6 | 7.29  | 2 | 0 | 1509.77 | 210  | 223  | 215  |
| (Q6UVK1) Chondroitin sulfate proteoglycan 4 precursor (Chondroitin sulfate proteoglycan NG2) (Melanoma chondroitin sulfate proteoglycan) (Melanoma-associated chondroitin sulfate proteoglycan)                                                    | CSPG4_HUMAN | 250476 |  |  |  | LGLTPEATN <del>A</del> SL <del>L</del> GCMEDLSVNGQR | R | R | 95% | 84.9  | 37.6 | 5.80  | 1 | 0 | 2648.26 | 340  | 364  | 348  |





List of Glycopeptide Identified

|                                                                                                                                                                                                                                               |             |        |                                                                                                                        |   |   |     |       |      |       |      |   |         |         |     |          |     |
|-----------------------------------------------------------------------------------------------------------------------------------------------------------------------------------------------------------------------------------------------|-------------|--------|------------------------------------------------------------------------------------------------------------------------|---|---|-----|-------|------|-------|------|---|---------|---------|-----|----------|-----|
| (Q9H5V8) CUB domain-containing protein 1 precursor (Transmembrane and associated with src kinases) (Membrane glycoprotein gp140) (Subtractive immunization M plus HEP3 associated 135 kDa protein) (SIMA135) (CD318 antigen)                  | CDCP1_HUMAN | 92858  |                                                                                                                        | R | I | 95% | 80.7  | 38.7 | 2.03  | 2    | 0 | 1299.60 | 174     | 185 | 180      |     |
| (Q9H5V8) CUB domain-containing protein 1 precursor (Transmembrane and associated with src kinases) (Membrane glycoprotein gp140) (Subtractive immunization M plus HEP3 associated 135 kDa protein) (SIMA135) (CD318 antigen)                  | CDCP1_HUMAN | 92858  | ASVSFLN <b>N</b> LSNCR                                                                                                 | R | K | 95% | 68.0  | 38.6 | 10.00 | 1    | 0 | 1758.81 | 262     | 276 | 270      |     |
| (Q9HAT2) Sialate O-acetyltransferase precursor (EC 3.1.1.53) (Sialic acid-specific 9-O-acetyltransferase) (H Lse)                                                                                                                             | SIAE_HUMAN  | 58297  | ALAYGE <b>K</b> NLTFEGPLPEK                                                                                            | R | I | 95% | 92.9  | 38.6 | 7.00  | 1    | 0 | 1978.02 | 394     | 411 | 401      |     |
| (Q9HD45) Transmembrane 9 superfamily protein member 3 precursor (SM-11044-binding protein) (EP70-P-iso)                                                                                                                                       | TM9S3_HUMAN | 67873  | IVD <b>V</b> NLTSE <b>G</b> K                                                                                          | R | V | 95% | 63.9  | 39.1 | 4.12  | 1    | 0 | 1175.62 | 170     | 180 | 174      |     |
| (Q9HDC9) Adipocyte plasma membrane-associated protein (BSCV protein)                                                                                                                                                                          | APMAP_HUMAN | 46464  | AG <b>P</b> NGTLFVADAYK                                                                                                | R | G | 95% | 100.0 | 38.7 | 8.41  | 1    | 0 | 1424.71 | 157     | 170 | 160      |     |
| (Q9NPR2) Semaphorin-4B precursor                                                                                                                                                                                                              | SEM4B_HUMAN | 92176  | FEAEHIS <b>N</b> YATALLSR                                                                                              | R | D | 95% | 64.2  | 38.4 | 11.10 | 1    | 0 | 1864.94 | 57      | 72  | 64       |     |
| (Q9P2B2) Prostaglandin F2 receptor negative regulator precursor (Prostaglandin F2-alpha receptor regulatory protein) (Prostaglandin F2-alpha receptor-associated protein) (CD9 partner 1) (CD9P-1) (CD315 antigen)                            | FPRP_HUMAN  | 98538  | ELD <b>L</b> T <b>C</b> NTTDR                                                                                          |   | K | A   | 95%   | 68.4 | 38.5  | 2.80 | 1 | 0       | 1451.67 | 294 | 305      | 300 |
| (Q9P2B2) Prostaglandin F2 receptor negative regulator precursor (Prostaglandin F2-alpha receptor regulatory protein) (Prostaglandin F2-alpha receptor-associated protein) (CD9 partner 1) (CD9P-1) (CD315 antigen)                            | FPRP_HUMAN  | 98538  | LEN <b>W</b> TDASR                                                                                                     |   | K | V   | 95%   | 49.7 | 39.3  | 1.26 | 1 | 0       | 1092.50 | 616 | 624      | 618 |
| (Q9P2B2) Prostaglandin F2 receptor negative regulator precursor (Prostaglandin F2-alpha receptor regulatory protein) (Prostaglandin F2-alpha receptor-associated protein) (CD9 partner 1) (CD9P-1) (CD315 antigen)                            | FPRP_HUMAN  | 98538  | EAATSLN <b>P</b> IEIDFQTSG <b>P</b> IF <b>N</b> ASVHSDTP <b>S</b> VR                                                   | R | G | 95% | 129.0 | 38.1 | 7.24  | 0    | 1 | 3601.77 | 670     | 703 | 691      |     |
| (Q9UHG3) Prenylcysteine oxidase precursor (EC 1.8.3.5) (PCL1)                                                                                                                                                                                 | PCYOX_HUMAN | 56595  | LLHALGGDD <b>F</b> LG <b>M</b> L <b>N</b> R                                                                            | K | T | 95% | 58.5  | 38.6 | 4.80  | 1    | 0 | 1758.89 | 182     | 197 | 196      |     |
| (Q9UHG3) Prenylcysteine oxidase precursor (EC 1.8.3.5) (PCL1)                                                                                                                                                                                 | PCYOX_HUMAN | 56595  | GEL <b>N</b> T <b>S</b> IFSSRPIDK                                                                                      | K | F | 95% | 70.1  | 38.5 | 3.80  | 1    | 0 | 1664.85 | 350     | 364 | 353      |     |
| (Q9UHL4) Dipeptidyl-peptidase 2 precursor (EC 3.4.14.2) (Dipeptidyl-peptidase II) (DPP II) (Dipeptidyl aminopeptidase II) (Quiescent cell proline dipeptidase) (Dipeptidyl peptidase 7)                                                       | DPP2_HUMAN  | 54311  | ALAG <b>L</b> V <b>Y</b> NASGSEHCYDI <b>R</b>                                                                          | R | L | 95% | 151.0 | 38.2 | 3.04  | 2    | 0 | 2260.03 | 308     | 327 | 315      |     |
| (Q9UHX3) EGF-like module-containing mucin-like hormone receptor-like 2 precursor (EGF-like module EMR2) (CD312 antigen)                                                                                                                       | EMR2_HUMAN  | 90454  | WCPQDSS <b>C</b> V <b>N</b> ATACR                                                                                      | R | C | 95% | 46.0  | 39.0 | 3.44  | 1    | 0 | 1812.71 | 32      | 46  | 41       |     |
| (Q9UNW1) Multiple inositol polyphosphate phosphatase 1 precursor (EC 3.1.3.62) (Inositol (1,3,4,5)-tetrakisphosphate 3-phosphatase) (Ins(1,3,4,5)P(4) 3-phosphatase)                                                                          | MINP1_HUMAN | 55035  | FLTE <b>V</b> E <b>K</b> NATALYH <b>V</b> EAFK                                                                         | K | T | 95% | 85.5  | 38.8 | 8.82  | 1    | 0 | 2211.13 | 235     | 253 | 242      |     |
| (Q9UNW1) Multiple inositol polyphosphate phosphatase 1 precursor (EC 3.1.3.62) (Inositol (1,3,4,5)-tetrakisphosphate 3-phosphatase) (Ins(1,3,4,5)P(4) 3-phosphatase)                                                                          | MINP1_HUMAN | 55035  | <b>N</b> ATALYH <b>V</b> EAFK                                                                                          | K | T | 95% | 61.3  | 39.3 | 4.59  | 1    | 0 | 1364.68 | 242     | 253 | 242      |     |
| (Q9Y251) Heparanase precursor (EC 3.2.-.-) (Heparanase-1) (Hpa1) (Endo-glucuronidase) [Contains: Heparanase 8 kDa subunit; Heparanase 50 kDa subunit]                                                                                         | HPSE_HUMAN  | 61162  | GY <b>N</b> ISWELG <b>N</b> EPNS <b>F</b> LK                                                                           | K | K | 95% | 67.5  | 38.2 | 4.51  | 1    | 0 | 1968.93 | 215     | 231 | 217      |     |
| (Q9Y2E5) Epididymis-specific alpha-mannosidase precursor (EC 3.2.1.24) (Mannosidase alpha class 2B member 2)                                                                                                                                  | MA2B2_HUMAN | 113870 | QE <b>I</b> F <b>H</b> IMDQ <b>Y</b> S <b>C</b> Y <b>T</b> P <b>S</b> H <b>I</b> P <b>F</b> S <b>N</b> R               | R | S | 95% | 0.0   | 0.0  | 5.70  | 0    | 1 | 2955.31 | 204     | 227 | 226      |     |
| (Q9Y2E5) Epididymis-specific alpha-mannosidase precursor (EC 3.2.1.24) (Mannosidase alpha class 2B member 2)                                                                                                                                  | MA2B2_HUMAN | 113870 | AL <b>H</b> AL <b>N</b> V <b>T</b> W <b>R</b>                                                                          | R | V | 95% | 28.7  | 38.6 | 3.72  | 1    | 0 | 1181.64 | 331     | 340 | 336      |     |
| (Q9Y2E5) Epididymis-specific alpha-mannosidase precursor (EC 3.2.1.24) (Mannosidase alpha class 2B member 2)                                                                                                                                  | MA2B2_HUMAN | 113870 | RP <b>Y</b> V <b>S</b> V <b>N</b> NSIAR                                                                                | R | N | 95% | 52.9  | 38.7 | 4.96  | 1    | 0 | 1539.79 | 741     | 753 | 748      |     |
| (Q9Y4L1) 150 kDa oxygen-regulated protein precursor (Orp150) (Hypoxia up-regulated 1)                                                                                                                                                         | OXR_P_HUMAN | 111319 | V <b>F</b> GS <b>Q</b> N <b>L</b> TT <b>V</b> K                                                                        | R | L | 95% | 79.0  | 38.7 | 2.27  | 1    | 0 | 1194.64 | 510     | 520 | 515      |     |
| (Q9Y4L1) 150 kDa oxygen-regulated protein precursor (Orp150) (Hypoxia up-regulated 1)                                                                                                                                                         | OXR_P_HUMAN | 111319 | LSALD <b>N</b> LL <b>N</b> HSS <b>M</b> FLK                                                                            | R | G | 95% | 47.1  | 38.7 | 7.92  | 2    | 2 | 1819.93 | 822     | 837 | 830      |     |
| (Q9Y4L1) 150 kDa oxygen-regulated protein precursor (Orp150) (Hypoxia up-regulated 1)                                                                                                                                                         | OXR_P_HUMAN | 111319 | <b>V</b> IN <b>E</b> T <b>A</b> W <b>A</b> K                                                                           | K | N | 95% | 65.9  | 39.1 | 1.68  | 2    | 0 | 1147.58 | 860     | 868 | 862      |     |
| (Q9Y4L1) 150 kDa oxygen-regulated protein precursor (Orp150) (Hypoxia up-regulated 1)                                                                                                                                                         | OXR_P_HUMAN | 111319 | <b>V</b> IN <b>E</b> T <b>A</b> W <b>A</b> K <b>N</b> AT <b>L</b> AE <b>Q</b> A <b>K</b>                               | K | L | 95% | 88.2  | 38.3 | 8.00  | 2    | 2 | 2075.05 | 860     | 877 | 862, 869 |     |
| (Q9Y4L1) 150 kDa oxygen-regulated protein precursor (Orp150) (Hypoxia up-regulated 1)                                                                                                                                                         | OXR_P_HUMAN | 111319 | <b>D</b> K <b>N</b> G <b>T</b> R <b>A</b> E <b>P</b> PL <b>N</b> AS <b>A</b> S <b>D</b> Q <b>G</b> E <b>K</b>          | K | V | 95% | 71.3  | 38.8 | 5.44  | 1    | 0 | 2187.02 | 920     | 940 | 931      |     |
| (Q9Y4L1) 150 kDa oxygen-regulated protein precursor (Orp150) (Hypoxia up-regulated 1)                                                                                                                                                         | OXR_P_HUMAN | 111319 | <b>A</b> E <b>P</b> PL <b>N</b> AS <b>A</b> S <b>D</b> Q <b>G</b> E <b>K</b>                                           | R | V | 95% | 92.3  | 39.0 | 5.11  | 13   | 1 | 1514.70 | 926     | 940 | 931      |     |
| (Q9Y5Y6) Suppressor of tumorigenicity protein 14 (EC 3.4.21.-) (Serine protease 14) (Matriptase) (Membrane-type serine protease 1) (MT-SP1) (Prostamin) (Serine protease TADG-15) (Tumor-associated differentially-expressed gene 15 protein) | ST14_HUMAN  | 94751  | <b>I</b> T <b>N</b> E <b>F</b> V <b>D</b> A <b>Y</b> E <b>N</b> S <b>T</b> E <b>F</b> V <b>S</b> L <b>A</b> S <b>K</b> | R | V | 95% | 118.0 | 37.6 | 9.19  | 2    | 0 | 2680.23 | 96      | 119 | 109      |     |

List of Glycopeptide Identified

|                                                                                                                                                                                                                                                        |            |       |                    |   |   |     |      |      |      |   |   |         |     |     |     |
|--------------------------------------------------------------------------------------------------------------------------------------------------------------------------------------------------------------------------------------------------------|------------|-------|--------------------|---|---|-----|------|------|------|---|---|---------|-----|-----|-----|
| (Q9Y5Y6) Suppressor of tumorigenicity protein 14<br>(EC 3.4.21.-) (Serine protease 14) (Matriptase)<br>(Membrane-type serine protease 1) (MT-SP1)<br>(Prostamin) (Serine protease TADG-15) (Tumor-associated differentially-expressed gene 15 protein) | ST14_HUMAN | 94751 | CDGWADCTDHSDELNCS  | R | N | 95% | 0.0  | 0.0  | 8.68 | 0 | 1 | 3229.15 | 471 | 497 | 485 |
| (Q9Y5Y6) Suppressor of tumorigenicity protein 14<br>(EC 3.4.21.-) (Serine protease 14) (Matriptase)<br>(Membrane-type serine protease 1) (MT-SP1)<br>(Prostamin) (Serine protease TADG-15) (Tumor-associated differentially-expressed gene 15 protein) | ST14_HUMAN | 94751 | VINQITTCENLLPQITPR | R | M | 95% | 92.9 | 38.7 | 7.28 | 2 | 1 | 2126.09 | 770 | 787 | 772 |
|                                                                                                                                                                                                                                                        |            |       |                    |   |   |     |      |      |      |   |   |         |     |     |     |
|                                                                                                                                                                                                                                                        |            |       |                    |   |   |     |      |      |      |   |   |         |     |     |     |

# List of Glycopeptide Identified

## GlycoPeptide Identified in DRO-1 Cell Line

Experiment: DRO-p54-p56-PNGF

Peak List Generator Version: BioWorks 3.3.1  
 Charge States Calculated: yes  
 Database Set: Database Name: the Sprot\_060206 database  
 Version: 06/26/06  
 Taxonomy: Homo sapiens  
 Number of Proteins: 14164  
 Search Engine Set: 2 Search Engines  
 Search Engine: Mascot; Version: 2.1.03  
 Fragment Tolerance: 0.80 Da (Monoisotopic)  
 Parent Tolerance: 1.6 Da (Monoisotopic)  
 Fixed Modifications: +57 on C (Carbamidomethyl)  
 Variable Modifications: +1 on N (Deamidation), +16 on M (Oxidation)  
 Database: the Sprot\_060206 database (selected for Homo sapiens, unknown version, 14164 entries)  
 Digestion Enzyme: Trypsin; Max Missed Cleavages: 2  
 Search Engine: XI Tandem; Version: 2007.01.01.1  
 Fragment Tolerance: 0.100 Da (Monoisotopic)  
 Parent Tolerance: 1.6 Da (Monoisotopic)  
 Fixed Modifications: +57 on C (Carbamidomethyl)  
 Variable Modifications: +1 on N (Deamidation), +16 on M (Oxidation)  
 Database: a subset of the uniprot\_sprot\_060206-oval database  
 Digestion Enzyme: Trypsin; Max Missed Cleavages: 2  
 Scaffold Version: Scaffold-2\_00\_00\_final

| Protein name                                                                                                                                                                                                                                        | Swiss-Prot Accession Name | Protein molecular weight (Da) | Peptide sequence                        | Previous amino acid | Next amino acid | Best Peptide identification probability | Best Mascot Ion score | Best Mascot Identity score | Best XI Tandem - log(e) score | Number of identified +2H spectra | Number of identified +3H spectra | Calculated +1H Peptide Mass (AMU) | Peptide start index | Peptide stop index | N-linked Site | Potential N-linked site |
|-----------------------------------------------------------------------------------------------------------------------------------------------------------------------------------------------------------------------------------------------------|---------------------------|-------------------------------|-----------------------------------------|---------------------|-----------------|-----------------------------------------|-----------------------|----------------------------|-------------------------------|----------------------------------|----------------------------------|-----------------------------------|---------------------|--------------------|---------------|-------------------------|
| (O00115) Deoxyribonuclease-2-alpha precursor (EC 3.1.22.1) (Deoxyribonuclease II alpha) (DNase II alpha) (Acid DNase) (Lysosomal DNase II) (R31240_2)                                                                                               | DNS2A_HUMAN               | 39563                         | SNTSQLAFLLYNDQPPQPSK                    | R                   | A               | 95.00%                                  | 57.7                  | 38.1                       | 7.11                          | 2                                | 0                                | 2250.09                           | 85                  | 104                | 86            |                         |
| (O00115) Deoxyribonuclease-2-alpha precursor (EC 3.1.22.1) (Deoxyribonuclease II alpha) (DNase II alpha) (Acid DNase) (Lysosomal DNase II) (R31240_2)                                                                                               | DNS2A_HUMAN               | 39563                         | TVGILPSNCSDIWQVLNVNQIAFPGPAGPSFNSTEDHSK | K                   | W               | 95.00%                                  | 154.0                 | 37.7                       | 7.51                          | 0                                | 1                                | 4199.00                           | 259                 | 297                | 266, 290      |                         |
| (O00754) Lysosomal alpha-mannosidase precursor (EC 3.2.1.24) (Mannosidase, alpha B) (Lysosomal acid alpha-mannosidase) (Laman) (Mannosidase alpha class 2B member 1) (Contains: Lysosomal alpha-mannosidase A peptide; Lysosomal alpha-mannosidase) | MA2B1_HUMAN               | 113656                        | WWHQQTNAQVEVVR                          | R                   | D               | 95.00%                                  | 35.2                  | 38.6                       | 5.74                          | 1                                | 0                                | 1783.85                           | 126                 | 139                |               | 133                     |
| (O00754) Lysosomal alpha-mannosidase precursor (EC 3.2.1.24) (Mannosidase, alpha B) (Lysosomal acid alpha-mannosidase) (Laman) (Mannosidase alpha class 2B member 1) (Contains: Lysosomal alpha-mannosidase A peptide; Lysosomal alpha-mannosidase) | MA2B1_HUMAN               | 113656                        | TPLVQEVHQNFSAWCQQVVR                    | K                   | L               | 95.00%                                  | 52.0                  | 38.8                       | 3.14                          | 0                                | 1                                | 2386.16                           | 682                 | 701                |               | 692                     |
| (O14773) Tripeptidyl-peptidase 1 precursor (EC 3.4.14.9) (Tripeptidyl-peptidase I) (TPP-I) (Tripeptidyl aminopeptidase) (Lysosomal pepstatin insensitive protease) (LPIC) (Growth-inhibiting gene 1 protein)                                        | TPP1_HUMAN                | 61230                         | YNLTSQDVGSGTNNNSOACQAFLEQYFHDSDLAQFMR   | R                   | L               | 95.00%                                  | 180.0                 | 37.8                       | 8.21                          | 0                                | 3                                | 4232.81                           | 209                 | 245                |               | 210, 222                |
| (O14773) Tripeptidyl-peptidase 1 precursor (EC 3.4.14.9) (Tripeptidyl-peptidase I) (TPP-I) (Tripeptidyl aminopeptidase) (Lysosomal pepstatin insensitive protease) (LPIC) (Growth-inhibiting gene 1 protein)                                        | TPP1_HUMAN                | 61230                         | FLSSSPHLPSSYFNASGR                      | K                   | A               | 95.00%                                  | 65.9                  | 38.5                       | 3.09                          | 0                                | 3                                | 2051.98                           | 429                 | 447                | 443           |                         |
| (O43852) Calumenin precursor (Crocaltin) (IEF SSP 9302)                                                                                                                                                                                             | CALU_HUMAN                | 37090                         | GHDLNEGLVSWEEYKNATYGYVLDDPDDGDFNYK      | K                   | Q               | 95.00%                                  | 72.1                  | 38.1                       | 5.40                          | 0                                | 2                                | 4152.78                           | 115                 | 150                |               | 131                     |
| (O60568) Procollagen-lysine-2-oxoglutarate 5-dioxygenase 3 precursor (EC 1.14.11.4) (Lysyl hydroxylase 3) (LH3)                                                                                                                                     | PLOD3_HUMAN               | 84769                         | SAEFFNYTVR                              | R                   | T               | 95.00%                                  | 73.3                  | 39.5                       | 2.89                          | 2                                | 0                                | 1234.57                           | 58                  | 67                 |               | 63                      |
| (O95302) FK506-binding protein 9 precursor (EC 5.2.1.8) (Peptidyl-prolyl cis-trans isomerase) (P-Plase) (Rotamase)                                                                                                                                  | FKBP9_HUMAN               | 63067                         | YHYNGTLLDGTFLDSSYSR                     | R                   | N               | 95.00%                                  | 59.2                  | 38.4                       | 12.20                         | 2                                | 0                                | 2210.00                           | 283                 | 301                | 286           |                         |
| (O95857) Tetraspanin-13 (Tspan-13) (Transmembrane 4 superfamily member 13) (Tetraspan NET-6)                                                                                                                                                        | TSN13_HUMAN               | 22130                         | SVNPNDTCLASCVK                          | R                   | S               | 95.00%                                  | 63.6                  | 38.9                       | 4.77                          | 1                                | 0                                | 1565.69                           | 133                 | 146                |               | 137                     |
| (P00750) Tissue-type plasminogen activator precursor (EC 3.4.21.68) (tPA) (t-PA) (t-plasminogen activator) (Alteplase) (Retepase) (Contains: Tissue-type plasminogen activator chain A; Tissue-type plasminogen activator chain B)                  | TPA_HUMAN                 | 62899                         | GTWSTAESGAECTNWNSSALAQKPYSGR            | R                   | R               | 95.00%                                  | 98.3                  | 38.6                       | 3.52                          | 0                                | 1                                | 3018.32                           | 137                 | 164                | 152           |                         |
| (P01011) Alpha-1-antichymotrypsin precursor (ACT) (Contains: Alpha-1-antichymotrypsin His-Pro-less)                                                                                                                                                 | AACT_HUMAN                | 47635                         | FNLTETSEAEIHQSFOHLR                     | K                   | T               | 95.00%                                  | 122.0                 | 38.1                       | 3.77                          | 3                                | 4                                | 2401.18                           | 105                 | 124                | 106           |                         |
| (P01011) Alpha-1-antichymotrypsin precursor (ACT) (Contains: Alpha-1-antichymotrypsin His-Pro-less)                                                                                                                                                 | AACT_HUMAN                | 47635                         | TLNQSSDELOLQMGNAFMVK                    | R                   | E               | 95.00%                                  | 138.0                 | 38.6                       | 9.85                          | 73                               | 23                               | 2214.04                           | 125                 | 144                | 127           |                         |

List of Glycopeptide Identified

|                                                                                                                                                                                                                                                      |             |        |                                       |   |   |        |       |      |       |   |   |         |     |     |         |     |
|------------------------------------------------------------------------------------------------------------------------------------------------------------------------------------------------------------------------------------------------------|-------------|--------|---------------------------------------|---|---|--------|-------|------|-------|---|---|---------|-----|-----|---------|-----|
| (P01011) Alpha-1-antichymotrypsin precursor (ACT)<br>[Contains: Alpha-1-antichymotrypsin His-Pro-less]                                                                                                                                               | AACT_HUMAN  | 47635  | LINDYVKNKGR                           | K | G | 95.00% | 59.6  | 38.9 | 2.12  | 5 | 0 | 1294.66 | 179 | 189 | 186     |     |
| (P01011) Alpha-1-antichymotrypsin precursor (ACT)<br>[Contains: Alpha-1-antichymotrypsin His-Pro-less]                                                                                                                                               | AACT_HUMAN  | 47635  | YTGNASALFIPDQDK                       | K | M | 95.00% | 118.0 | 38.5 | 6.68  | 7 | 0 | 1753.87 | 268 | 283 | 271     |     |
| (P01023) Alpha-2-macroglobulin precursor (Alpha-2 M)                                                                                                                                                                                                 | A2MG_HUMAN  | 163259 | GNEANYYSNATDDEHGLVQFSINTNVMGTLTVR     | R | V | 95.00% | 55.8  | 37.7 | 3.17  | 0 | 1 | 3823.72 | 388 | 422 | 396,410 |     |
| (P01023) Alpha-2-macroglobulin precursor (Alpha-2 M)                                                                                                                                                                                                 | A2MG_HUMAN  | 163259 | SLGNVNFVTSAAELSQELCGTEVPSVPEHGR       | K | K | 95.00% | 0.0   | 0    | 5.21  | 0 | 1 | 3415.60 | 864 | 895 | 869     |     |
| (P01033) Metalloproteinase inhibitor 1 precursor (TIMP-1) (Erythroid potentiating activity) (EPA) (Tissue inhibitor of metalloproteinases) (Fibroblast collagenase inhibitor) (Collagenase inhibitor)                                                | TIMP1_HUMAN | 23153  | FVGTPEVQNTTLYQR                       | K | Y | 95.00% | 94.4  | 38.9 | 7.54  | 2 | 0 | 1753.88 | 46  | 60  | 53      |     |
| (P02787) Serotransferrin precursor (Transferrin) (Siderophilin) (Beta-1-metal-binding globulin)                                                                                                                                                      | TRFE_HUMAN  | 77032  | QQQHLFGSNVTDGCSGNFCLFR                | R | S | 95.00% | 0.0   | 0    | 15.30 | 4 | 4 | 2500.07 | 622 | 642 | 630     |     |
| (P02790) Hemopexin precursor (Beta-1B-glycoprotein)                                                                                                                                                                                                  | HEMO_HUMAN  | 51659  | SWPAVGNCSALR                          | R | W | 95.00% | 70.7  | 39.1 | 3.44  | 1 | 0 | 1405.65 | 181 | 193 | 187     |     |
| (P04062) Glucosylceramidase precursor (EC 3.2.1.45) (Beta-glucocerebrosidase) (Acid beta-glucosidase) (D-glucosyl-N-acylsphingosine glucosylase) (Alglucerase) (Imiglucerase)                                                                        | GLCM_HUMAN  | 59700  | DLGPTLANSTHHNVR                       | R | L | 95.00% | 80.4  | 39.1 | 4.89  | 2 | 0 | 1632.81 | 302 | 316 | 309     |     |
| (P04216) Thy-1 membrane glycoprotein precursor (Thy-1 antigen) (CD90 antigen) (CDw90 antigen)                                                                                                                                                        | THY1_HUMAN  | 17917  | HENTSSSPIQYEFSLTR                     | R | E | 95.00% | 87.6  | 38.8 | 10.00 | 1 | 0 | 1996.93 | 40  | 56  | 42      |     |
| (P05026) Sodium/potassium-transporting ATPase subunit beta-1 (Sodium/potassium-dependent ATPase beta-1 subunit)                                                                                                                                      | AT1B1_HUMAN | 35045  | YLQDLLAVQFTNLMTDEIR                   | K | I | 95.00% | 90.9  | 38.4 | 8.96  | 1 | 0 | 2383.22 | 254 | 273 | 265     |     |
| (P05090) Apolipoprotein D precursor (Apo-D) (ApoD)                                                                                                                                                                                                   | APOD_HUMAN  | 21258  | ADGTVNQIEGEATPVNLTEPAK                | R | L | 95.00% | 96.6  | 38   | 8.96  | 2 | 0 | 2255.10 | 83  | 104 | 98      |     |
| (P05154) Plasma serine protease inhibitor precursor (PCI) (Protein C inhibitor) (Plasminogen activator inhibitor 3) (PAI-3) (PAI3) (Acrosomal serine protease inhibitor)                                                                             | IPSP_HUMAN  | 45685  | VVGVPYQGNATALFILPSEK                  | R | M | 95.00% | 40.6  | 38.4 | 6.64  | 1 | 0 | 2161.15 | 254 | 274 | 262     |     |
| (P05362) Intercellular adhesion molecule 1 precursor (ICAM-1) (Major group rhinovirus receptor) (CD54 antigen)                                                                                                                                       | ICAM1_HUMAN | 57807  | ANLTVVLLR                             | R | G | 95.00% | 70.9  | 39.2 | 3.05  | 2 | 0 | 999.62  | 144 | 152 | 145     |     |
| (P05362) Intercellular adhesion molecule 1 precursor (ICAM-1) (Major group rhinovirus receptor) (CD54 antigen)                                                                                                                                       | ICAM1_HUMAN | 57807  | TELDLRPGGLELFENTSAPYQLQTFVLPATPPQVLSR | R | V | 95.00% | 49.1  | 37.7 | 4.24  | 0 | 2 | 4267.23 | 188 | 225 | 202     |     |
| (P05362) Intercellular adhesion molecule 1 precursor (ICAM-1) (Major group rhinovirus receptor) (CD54 antigen)                                                                                                                                       | ICAM1_HUMAN | 57807  | LNPTVTYGNDSFSAK                       | R | A | 95.00% | 89.3  | 38.6 | 4.24  | 2 | 0 | 1614.77 | 259 | 273 | 267     |     |
| (P05362) Intercellular adhesion molecule 1 precursor (ICAM-1) (Major group rhinovirus receptor) (CD54 antigen)                                                                                                                                       | ICAM1_HUMAN | 57807  | LDERDCPNWVTWPNESQQQTPMCQAWGNLPELK     | R | C | 95.00% | 55.4  | 37.8 | 4.80  | 0 | 2 | 3973.71 | 398 | 430 |         | 406 |
| (P06865) Beta-hexosaminidase alpha chain precursor (EC 3.2.1.52) (N-acetyl-beta-glucosaminidase) (Beta-N-acetylhexosaminidase) (Hexosaminidase A)                                                                                                    | HEXA_HUMAN  | 60672  | SAEGTFFINIK                           | K | T | 95.00% | 64.7  | 39.4 | 3.25  | 2 | 0 | 1114.54 | 149 | 158 | 157     |     |
| (P07339) Cathepsin D precursor (EC 3.4.23.5) [Contains: Cathepsin D light chain; Cathepsin D heavy chain]                                                                                                                                            | CATD_HUMAN  | 44535  | GSLSYLVNTR                            | K | K | 95.00% | 87.3  | 38.7 | 3.77  | 4 | 0 | 1110.58 | 257 | 266 | 263     |     |
| (P07602) Proactivator polypeptide precursor [Contains: Saposin A (Protein A); Saposin B-Val; Saposin B (Sphingolipid activator protein 1) (SAP-1) (Cerebroside sulfate activator) (CSAct) (Dispersin) (Sulfatide/GM1 activator); Saposin C (Co-beta- | SAP_HUMAN   | 58094  | DNATEEEILVYLEK                        | K | T | 95.00% | 96.4  | 39.2 | 3.03  | 2 | 2 | 1666.81 | 79  | 92  | 80      |     |
| (P07602) Proactivator polypeptide precursor [Contains: Saposin A (Protein A); Saposin B-Val; Saposin B (Sphingolipid activator protein 1) (SAP-1) (Cerebroside sulfate activator) (CSAct) (Dispersin) (Sulfatide/GM1 activator); Saposin C (Co-beta- | SAP_HUMAN   | 58094  | TCDWLKPKNMSASCK                       | K | E | 95.00% | 0.0   | 0    | 3.62  | 1 | 0 | 1811.78 | 93  | 107 | 101     |     |
| (P07602) Proactivator polypeptide precursor [Contains: Saposin A (Protein A); Saposin B-Val; Saposin B (Sphingolipid activator protein 1) (SAP-1) (Cerebroside sulfate activator) (CSAct) (Dispersin) (Sulfatide/GM1 activator); Saposin C (Co-beta- | SAP_HUMAN   | 58094  | TNSTFVQALVEHVK                        | R | E | 95.00% | 80.7  | 39.3 | 5.74  | 5 | 1 | 1573.82 | 214 | 227 | 215     |     |
| (P07602) Proactivator polypeptide precursor [Contains: Saposin A (Protein A); Saposin B-Val; Saposin B (Sphingolipid activator protein 1) (SAP-1) (Cerebroside sulfate activator) (CSAct) (Dispersin) (Sulfatide/GM1 activator); Saposin C (Co-beta- | SAP_HUMAN   | 58094  | LIDNNKTEKELDAFDK                      | K | M | 95.00% | 83.6  | 38.7 | 7.33  | 6 | 0 | 2008.01 | 328 | 344 | 332     |     |
| (P07602) Proactivator polypeptide precursor [Contains: Saposin A (Protein A); Saposin B-Val; Saposin B (Sphingolipid activator protein 1) (SAP-1) (Cerebroside sulfate activator) (CSAct) (Dispersin) (Sulfatide/GM1 activator); Saposin C (Co-beta- | SAP_HUMAN   | 58094  | NLEKNSTKQEILAALEK                     | R | G | 95.00% | 102.0 | 38.6 | 5.96  | 6 | 5 | 1931.03 | 422 | 438 | 426     |     |

List of Glycopeptide Identified

|                                                                                                                                                                                                                                                      |             |        |                                      |   |   |        |       |      |       |   |   |         |      |      |     |            |
|------------------------------------------------------------------------------------------------------------------------------------------------------------------------------------------------------------------------------------------------------|-------------|--------|--------------------------------------|---|---|--------|-------|------|-------|---|---|---------|------|------|-----|------------|
| (P07602) Proactivator polypeptide precursor [Contains: Saposin A (Protein A); Saposin B-Val; Saposin B (Sphingolipid activator protein 1) (SAP-1) (Cerebroside sulfate activator) (CSAct) (Dispersin) (Sulfatide/GM1 activator); Saposin C (Co-beta- | SAP_HUMAN   | 58094  | NSTKQEILAALEK                        | K | G | 95.00% | 65.1  | 39.3 | 5.15  | 2 | 0 | 1445.79 | 426  | 438  | 426 |            |
| (P07686) Beta-hexosaminidase beta chain precursor (EC 3.2.1.52) (N-acetyl-beta-glucosaminidase) (Beta-N-acetylhexosaminidase) (Hexosaminidase B) (Cervical cancer proto-oncogene 7) (HCC-7) [Contains: Beta-hexosaminidase beta-B chain; Beta-hexos  | HEXB_HUMAN  | 63095  | MTPNLLHLAPENFYISHSPNSTAGPSCSTLLEEAFR | K | R | 95.00% | 94.3  | 37.8 | 5.13  | 0 | 2 | 3932.85 | 65   | 99   |     | 84         |
| (P07711) Cathepsin L precursor (EC 3.4.22.15) (Major excreted protein) (MEP) [Contains: Cathepsin L heavy chain; Cathepsin L light chain]                                                                                                            | CATL_HUMAN  | 37546  | YSVANDTGFVDIPK                       | K | Q | 95.00% | 95.4  | 38.6 | 6.41  | 2 | 0 | 1526.74 | 217  | 230  | 221 |            |
| (P07858) Cathepsin B precursor (EC 3.4.22.1) (Cathepsin B1) (APP secretase) (APPS) [Contains: Cathepsin B light chain; Cathepsin B heavy chain]                                                                                                      | CATB_HUMAN  | 37803  | NTTWQAGHNFNVDMSYLK                   | R | R | 95.00% | 52.8  | 38.3 | 6.77  | 2 | 0 | 2306.02 | 38   | 56   |     | 38         |
| (P07942) Laminin beta-1 chain precursor (Laminin B1 chain)                                                                                                                                                                                           | LAMB1_HUMAN | 198045 | CVCNYLGTVQEHGNCSDQCQDK               | K | A | 95.00% | 0.0   | 0    | 9.59  | 2 | 0 | 2687.99 | 1028 | 1049 |     | 1041       |
| (P07942) Laminin beta-1 chain precursor (Laminin B1 chain)                                                                                                                                                                                           | LAMB1_HUMAN | 198045 | VNASTTEPNSTVEQSALMR                  | R | D | 95.00% | 90.6  | 38.5 | 10.30 | 3 | 0 | 2052.94 | 1335 | 1353 |     | 1336, 1343 |
| (P07942) Laminin beta-1 chain precursor (Laminin B1 chain)                                                                                                                                                                                           | LAMB1_HUMAN | 198045 | MEMPSTPQQQLNLTEDIR                   | K | E | 95.00% | 75.0  | 38.1 | 4.68  | 1 | 0 | 2163.99 | 1531 | 1548 |     | 1542       |
| (P08174) Complement decay-accelerating factor precursor (CD55 antigen)                                                                                                                                                                               | DAF_HUMAN   | 41382  | DSVICLKGSQWSDIEEFCNR                 | K | S | 95.00% | 63.4  | 39.3 | 1.00  | 0 | 1 | 2444.09 | 77   | 96   |     | 95         |
| (P08174) Complement decay-accelerating factor precursor (CD55 antigen)                                                                                                                                                                               | DAF_HUMAN   | 41382  | GSQWSDIEEFCNR                        | K | S | 95.00% | 70.6  | 39   | 2.40  | 2 | 0 | 1628.67 | 84   | 96   |     | 95         |
| (P08195) 4F2 cell-surface antigen heavy chain (4F2hc) (Lymphocyte activation antigen 4F2 large subunit) (4F2 heavy chain antigen) (CD98 antigen)                                                                                                     | 4F2_HUMAN   | 57929  | DASSFLAEWQNITK                       | K | G | 95.00% | 94.2  | 38.7 | 10.10 | 2 | 0 | 1610.77 | 254  | 267  | 264 |            |
| (P08195) 4F2 cell-surface antigen heavy chain (4F2hc) (Lymphocyte activation antigen 4F2 large subunit) (4F2 heavy chain antigen) (CD98 antigen)                                                                                                     | 4F2_HUMAN   | 57929  | LLIAGTNSDDQQLISLLESNK                | R | D | 95.00% | 62.2  | 39.5 | 1.96  | 0 | 1 | 2358.28 | 274  | 295  | 280 |            |
| (P08195) 4F2 cell-surface antigen heavy chain (4F2hc) (Lymphocyte activation antigen 4F2 large subunit) (4F2 heavy chain antigen) (CD98 antigen)                                                                                                     | 4F2_HUMAN   | 57929  | SLVTQYLNATGNR                        | K | W | 95.00% | 99.3  | 38.9 | 3.74  | 2 | 0 | 1437.73 | 316  | 328  | 323 |            |
| (P08236) Beta-glucuronidase precursor (EC 3.2.1.31) (Beta-G1)                                                                                                                                                                                        | BGLR_HUMAN  | 74699  | LLDAENKVVANGTGTQGQLK                 | R | V | 95.00% | 55.7  | 38.7 | 1.57  | 0 | 1 | 2058.07 | 262  | 281  | 272 |            |
| (P08236) Beta-glucuronidase precursor (EC 3.2.1.31) (Beta-G1)                                                                                                                                                                                        | BGLR_HUMAN  | 74699  | VVANGTGTQGQLK                        | K | V | 95.00% | 40.0  | 38.8 | 4.54  | 1 | 0 | 1273.68 | 269  | 281  | 272 |            |
| (P08236) Beta-glucuronidase precursor (EC 3.2.1.31) (Beta-G1)                                                                                                                                                                                        | BGLR_HUMAN  | 74699  | IANETRYPHSVAK                        | K | S | 95.00% | 35.1  | 38.8 | 4.17  | 1 | 0 | 1486.77 | 629  | 641  |     | 631        |
| (P08294) Extracellular superoxide dismutase [Cu-Zn] precursor (EC 1.15.1.1) (EC-SOD)                                                                                                                                                                 | SODE_HUMAN  | 25832  | LDAFFALEGFPTPENSSSR                  | K | A | 95.00% | 101.0 | 38.3 | 3.92  | 2 | 0 | 2085.98 | 93   | 111  | 107 |            |
| (P08648) Integrin alpha-5 precursor (Fibronectin receptor alpha subunit) (Integrin alpha-F) (VLA-5) (CD49e antigen) [Contains: Integrin alpha-5 heavy chain; Integrin alpha-5 light chain]                                                           | ITA5_HUMAN  | 114521 | TEKEPLSDPVGTCYLSTDNFTR               | R | I | 95.00% | 51.9  | 38.6 | 3.62  | 0 | 1 | 2531.16 | 164  | 185  |     | 182        |
| (P08962) CD63 antigen (Melanoma-associated antigen ME491) (Lysosome-associated membrane glycoprotein 3) (LAMP-3) (Ocular melanoma-associated antigen) (OMA81H) (Granulophysin) (Tetraspanin-30) (Tspan-30)                                           | CD63_HUMAN  | 25487  | NNHTASILDR                           | K | M | 95.00% | 39.5  | 38.6 | 5.35  | 1 | 0 | 1141.56 | 128  | 137  | 130 |            |
| (P08962) CD63 antigen (Melanoma-associated antigen ME491) (Lysosome-associated membrane glycoprotein 3) (LAMP-3) (Ocular melanoma-associated antigen) (OMA81H) (Granulophysin) (Tetraspanin-30) (Tspan-30)                                           | CD63_HUMAN  | 25487  | CCGAANYTDWEKIPSMK                    | K | N | 95.00% | 0.0   | 0    | 9.51  | 2 | 0 | 2117.86 | 144  | 161  |     | 150        |
| (P09486) SPARC precursor (Secreted protein acidic and rich in cysteine) (Osteonectin) (ON) (Basement-membrane protein 40) (BM-40)                                                                                                                    | SPRC_HUMAN  | 34614  | VCSNDNKFDTSSCHFFATK                  | K | C | 95.00% | 58.2  | 38.2 | 11.70 | 2 | 0 | 2266.94 | 111  | 129  | 116 |            |
| (P10253) Lysosomal alpha-glucosidase precursor (EC 3.2.1.20) (Acid maltase) (Aglucosidase alpha) [Contains: 76 kDa lysosomal alpha-glucosidase; 70 kDa lysosomal alpha-glucosidase]                                                                  | LYAG_HUMAN  | 105321 | LENLSSEMGYATLTR                      | K | T | 95.00% | 126.0 | 38.4 | 11.00 | 1 | 0 | 1889.88 | 138  | 154  | 140 |            |
| (P10253) Lysosomal alpha-glucosidase precursor (EC 3.2.1.20) (Acid maltase) (Aglucosidase alpha) [Contains: 76 kDa lysosomal alpha-glucosidase; 70 kDa lysosomal alpha-glucosidase]                                                                  | LYAG_HUMAN  | 105321 | GVFITNETGQPLIGK                      | R | V | 95.00% | 74.6  | 39.3 | 7.68  | 3 | 0 | 1574.84 | 465  | 479  | 470 |            |
| (P10253) Lysosomal alpha-glucosidase precursor (EC 3.2.1.20) (Acid maltase) (Aglucosidase alpha) [Contains: 76 kDa lysosomal alpha-glucosidase; 70 kDa lysosomal alpha-glucosidase]                                                                  | LYAG_HUMAN  | 105321 | NNTIVNELVR                           | R | V | 95.00% | 63.3  | 39.6 | 4.82  | 2 | 0 | 1172.63 | 882  | 891  | 882 |            |
| (P10253) Lysosomal alpha-glucosidase precursor (EC 3.2.1.20) (Acid maltase) (Aglucosidase alpha) [Contains: 76 kDa lysosomal alpha-glucosidase; 70 kDa lysosomal alpha-glucosidase]                                                                  | LYAG_HUMAN  | 105321 | VTVLGVATAPQQVLSNGVPSNFTYSPDTK        | K | V | 95.00% | 96.6  | 37.1 | 9.14  | 2 | 0 | 3091.58 | 904  | 933  | 925 |            |

List of Glycopeptide Identified

|                                                                                                                                                                                                                                                      |                |        |                                 |   |   |        |       |      |       |    |   |         |      |      |          |
|------------------------------------------------------------------------------------------------------------------------------------------------------------------------------------------------------------------------------------------------------|----------------|--------|---------------------------------|---|---|--------|-------|------|-------|----|---|---------|------|------|----------|
| (P10619) Lysosomal protective protein precursor (EC 3.4.16.5) (Cathepsin A) (Carboxypeptidase C) (Protective protein for beta-galactosidase) [Contains: Lysosomal protective protein 32 kDa chain; Lysosomal protective protein 20 kDa chain]        | PPGB_HUMAN     | 54450  | FYATNDTEVAQSNFEALQDFFR          | K | L | 95.00% | 90.2  | 37.5 | 6.54  | 2  | 0 | 2614.17 | 141  | 162  | 145      |
| (P10619) Lysosomal protective protein precursor (EC 3.4.16.5) (Cathepsin A) (Carboxypeptidase C) (Protective protein for beta-galactosidase) [Contains: Lysosomal protective protein 32 kDa chain; Lysosomal protective protein 20 kDa chain]        | PPGB_HUMAN     | 54450  | MDPPCTNTTAASTYLNPNPYVR          | R | K | 95.00% | 116.0 | 38.6 | 6.92  | 3  | 2 | 2403.06 | 327  | 347  | 333      |
| (P11047) Laminin gamma-1 chain precursor (Laminin B2 chain)                                                                                                                                                                                          | LAMC1_HUMAN    | 177587 | LLNLTSTIK                       | K | I | 95.00% | 52.5  | 39   | 3.25  | 1  | 0 | 1016.60 | 647  | 655  | 650      |
| (P11047) Laminin gamma-1 chain precursor (Laminin B2 chain)                                                                                                                                                                                          | LAMC1_HUMAN    | 177587 | VNNTLSSQISR                     | R | L | 95.00% | 95.8  | 39.1 | 2.59  | 5  | 0 | 1219.63 | 1106 | 1116 | 1107     |
| (P11047) Laminin gamma-1 chain precursor (Laminin B2 chain)                                                                                                                                                                                          | LAMC1_HUMAN    | 177587 | VAAANVSVTQPESTGDPNNMTLLAEEAR    | K | K | 95.00% | 96.7  | 37.4 | 4.57  | 1  | 0 | 2903.36 | 1157 | 1184 | 1161     |
| (P11047) Laminin gamma-1 chain precursor (Laminin B2 chain)                                                                                                                                                                                          | LAMC1_HUMAN    | 177587 | TANDTSTEAYLNLLR                 | K | T | 95.00% | 105.0 | 39.1 | 9.43  | 2  | 0 | 1682.82 | 1203 | 1217 | 1205     |
| (P11047) Laminin gamma-1 chain precursor (Laminin B2 chain)                                                                                                                                                                                          | LAMC1_HUMAN    | 177587 | TLAGENQTAFFEIEELNR              | R | K | 95.00% | 89.0  | 38.4 | 8.51  | 2  | 1 | 1935.93 | 1218 | 1234 | 1223     |
| (P11047) Laminin gamma-1 chain precursor (Laminin B2 chain)                                                                                                                                                                                          | LAMC1_HUMAN    | 177587 | KIPAINQTITEANEK                 | R | T | 95.00% | 94.0  | 38.9 | 3.92  | 2  | 0 | 1670.90 | 1390 | 1404 | 1395     |
| (P11047) Laminin gamma-1 chain precursor (Laminin B2 chain)                                                                                                                                                                                          | LAMC1_HUMAN    | 177587 | IPAINQTITEANEK                  | K | T | 95.00% | 84.3  | 39.2 | 4.57  | 1  | 0 | 1542.80 | 1391 | 1404 | 1395     |
| (P11117) Lysosomal acid phosphatase precursor (EC 3.1.3.2) (LAP)                                                                                                                                                                                     | PPAL_HUMAN     | 48299  | KNLTLMATTSQLPK                  | R | L | 95.00% | 53.8  | 39.2 | 3.82  | 1  | 0 | 1562.85 | 266  | 279  | 267      |
| (P11279) Lysosome-associated membrane glycoprotein 1 precursor (LAMP-1) (CD107a antigen)                                                                                                                                                             | LAMP1_HUMAN    | 44756  | SGPKNMTFDLPSDATVVLNR            | K | S | 95.00% | 87.8  | 38.3 | 4.66  | 1  | 1 | 2180.05 | 57   | 76   | 61, 75   |
| (P11279) Lysosome-associated membrane glycoprotein 1 precursor (LAMP-1) (CD107a antigen)                                                                                                                                                             | LAMP1_HUMAN    | 44756  | SSCGKENTSDPSLVIAFGR             | R | G | 95.00% | 90.4  | 38.6 | 7.70  | 1  | 0 | 2025.96 | 77   | 95   | 83       |
| (P11279) Lysosome-associated membrane glycoprotein 1 precursor (LAMP-1) (CD107a antigen)                                                                                                                                                             | LAMP1_HUMAN    | 44756  | GHTLTLNFR                       | R | N | 95.00% | 48.0  | 39.3 | 1.92  | 2  | 0 | 1160.61 | 96   | 105  | 102      |
| (P11279) Lysosome-associated membrane glycoprotein 1 precursor (LAMP-1) (CD107a antigen)                                                                                                                                                             | LAMP1_HUMAN    | 44756  | CVSGTQVMNNVTVTLHDATQIAYLSNSSFSR | R | G | 95.00% | 69.1  | 38.1 | 7.48  | 0  | 2 | 3539.65 | 154  | 185  | 164, 180 |
| (P13473) Lysosome-associated membrane glycoprotein 2 precursor (LAMP-2) (CD107b antigen)                                                                                                                                                             | LAMP2_HUMAN    | 44943  | WQMNFTVR                        | K | Y | 95.00% | 40.0  | 38.8 | 4.72  | 1  | 0 | 1098.50 | 46   | 53   | 49       |
| (P13473) Lysosome-associated membrane glycoprotein 2 precursor (LAMP-2) (CD107b antigen)                                                                                                                                                             | LAMP2_HUMAN    | 44943  | VASVININPNTHTHGSCR              | K | S | 95.00% | 69.6  | 38.7 | 4.43  | 0  | 1 | 2029.96 | 248  | 266  | 257      |
| (P13473) Lysosome-associated membrane glycoprotein 2 precursor (LAMP-2) (CD107b antigen)                                                                                                                                                             | LAMP2_HUMAN    | 44943  | VQPFNVTGK                       | R | Y | 95.00% | 26.2  | 39.4 | 3.31  | 2  | 0 | 1118.58 | 352  | 361  | 356      |
| (P13611) Versican core protein precursor (Large fibroblast proteoglycan) (Chondroitin sulfate proteoglycan core protein 2) (PG-M) (Glial hyaluronate-binding protein) (GHAP)                                                                         | CSPG2_HUMAN    | 372795 | FENQTGFPPDSR                    | R | F | 95.00% | 62.2  | 39.3 | 4.80  | 2  | 0 | 1492.67 | 328  | 340  | 330      |
| (P13987) CD59 glycoprotein precursor (Membrane attack complex inhibition factor) (MACIF) (MAC-inhibitory protein) (MAC-IP) (Protectin) (MEM43 antigen) (Membrane inhibitor of reactive lysis) (MIRL) (20 kDa homologous restriction factor) (HRF-20) | CD59_HUMAN     | 14159  | TAVNCSSDFDACLTK                 | K | A | 95.00% | 120.0 | 39   | 8.37  | 51 | 0 | 1802.79 | 40   | 55   | 43       |
| (P14625) Endoplasmic precursor (Heat shock protein 90 kDa beta member 1) (94 kDa glucose-regulated protein) (GRP94) (gp96 homolog) (Tumor rejection antigen 1)                                                                                       | ENPL_HUMAN     | 92454  | EEEEAIQLDGLNASQIR               | R | E | 95.00% | 63.2  | 38.5 | 8.19  | 2  | 0 | 1786.88 | 52   | 67   | 62       |
| (P15586) N-acetylglucosamine-6-sulfatase precursor (EC 3.1.6.14) (G6S) (Glucosamine-6-sulfatase)                                                                                                                                                     | GNS_HUMAN      | 62066  | YYNYTLSSINGK                    | K | A | 95.00% | 75.2  | 38.9 | 4.72  | 1  | 0 | 1337.63 | 181  | 191  | 183      |
| (P15586) N-acetylglucosamine-6-sulfatase precursor (EC 3.1.6.14) (G6S) (Glucosamine-6-sulfatase)                                                                                                                                                     | GNS_HUMAN      | 62066  | TPMTNSSIQFLDNAFR                | K | K | 95.00% | 123.0 | 38.5 | 10.40 | 5  | 0 | 1858.86 | 275  | 290  | 279      |
| (P15586) N-acetylglucosamine-6-sulfatase precursor (EC 3.1.6.14) (G6S) (Glucosamine-6-sulfatase)                                                                                                                                                     | GNS_HUMAN      | 62066  | GASNLTR                         | R | S | 95.00% | 54.2  | 39   | 2.37  | 4  | 0 | 905.45  | 402  | 409  | 405      |
| (P16070) CD44 antigen precursor (Phagocytic glycoprotein I) (PGP-1) (HUTCH-I) (Extracellular matrix receptor-III) (ECMR-III) (GP90 lymphocyte homing/adhesion receptor) (Hermes antigen) (Hyaluronate receptor) (Heparan sulfate proteoglycan) (Epi) | CD44_HUMAN     | 81535  | AFNSTLPTMAQMEK                  | K | A | 95.00% | 80.0  | 38.8 | 3.23  | 3  | 0 | 1585.72 | 55   | 68   | 57       |
| (P16112) Aggrecan core protein precursor (Cartilage-specific proteoglycan core protein) (CSPCP) (Chondroitin sulfate proteoglycan core protein 1) [Contains: Aggrecan core protein 2]                                                                | PGCA_HUMAN     | 250168 | TVYVHANQTYGDPSSR                | R | Y | 95.00% | 108.0 | 38.5 | 5.72  | 2  | 0 | 1892.88 | 327  | 343  | 333      |
| (P16112) Aggrecan core protein precursor (Cartilage-specific proteoglycan core protein) (CSPCP) (Chondroitin sulfate proteoglycan core protein 1) [Contains: Aggrecan core protein 2]                                                                | PGCA_HUMAN     | 250168 | TVYLYPNQTYGLPPLSR               | R | H | 95.00% | 82.5  | 38.4 | 7.39  | 2  | 0 | 1934.99 | 651  | 667  | 657      |
| (P16278) Beta-galactosidase precursor (EC 3.2.1.23) (Lactase) (Acid beta-galactosidase)                                                                                                                                                              | BGAL_HUMAN,BGA | 60536  | NNVITLNIITGK                    | R | A | 95.00% | 59.6  | 39   | 2.57  | 2  | 0 | 1187.66 | 458  | 468  | 464      |

List of Glycopeptide Identified

|                                                                                                                                                                                                                                                     |             |        |                           |   |   |        |       |      |       |   |   |         |      |      |      |
|-----------------------------------------------------------------------------------------------------------------------------------------------------------------------------------------------------------------------------------------------------|-------------|--------|---------------------------|---|---|--------|-------|------|-------|---|---|---------|------|------|------|
| (P16870) Carboxypeptidase E precursor (EC 3.4.17.10) (CPE) (Carboxypeptidase H) (CPH) (Enkephalin convertase) (Prohormone-processing carboxypeptidase)                                                                                              | CBPE_HUMAN  | 53134  | DLQGNPIANATISVEGIDHDVTSAK | R | D | 95.00% | 64.1  | 38.1 | 4.74  | 1 | 0 | 2567.25 | 382  | 406  | 390  |
| (P17050) Alpha-N-acetylgalactosaminidase precursor (EC 3.2.1.49) (Alpha-galactosidase B)                                                                                                                                                            | NAGAB_HUMAN | 46548  | LGVIADMGNFTCMGYPGTTLDK    | K | V | 95.00% | 99.2  | 38.6 | 9.80  | 1 | 0 | 2442.07 | 116  | 137  | 124  |
| (P17936) Insulin-like growth factor-binding protein 3 precursor (IGFBP-3) (IBP-3) (IGF-binding protein 3)                                                                                                                                           | IBP3_HUMAN  | 31642  | GLCVNASAVSR               | R | L | 95.00% | 84.1  | 38.8 | 5.49  | 5 | 0 | 1134.56 | 112  | 122  | 116  |
| (P17936) Insulin-like growth factor-binding protein 3 precursor (IGFBP-3) (IBP-3) (IGF-binding protein 3)                                                                                                                                           | IBP3_HUMAN  | 31642  | AYLLPAPPAPGNASEEEDR       | R | S | 95.00% | 79.5  | 38.6 | 6.60  | 1 | 0 | 2084.98 | 125  | 144  | 136  |
| (P21589) 5'-nucleotidase precursor (EC 3.1.3.5) (Ecto-5'-nucleotidase) (5'-NT) (CD73 antigen)                                                                                                                                                       | 5NTD_HUMAN  | 63351  | IKLDNYSTOELGK             | R | T | 95.00% | 54.2  | 38.6 | 6.57  | 1 | 0 | 1509.78 | 329  | 341  | 333  |
| (P24821) Tenascin precursor (TN) (Hexabrachion) (Cytotactin) (Neuronectin) (GMEM) (JI) (Miotendinous antigen) (Glioma-associated-extracellular matrix antigen) (GP 150-225) (Tenascin-C) (TN-C)                                                     | TENA_HUMAN  | 240845 | LNYSLPTGQWVGQLPR          | R | N | 95.00% | 67.4  | 38.3 | 5.85  | 1 | 0 | 1929.02 | 1017 | 1033 | 1018 |
| (P24821) Tenascin precursor (TN) (Hexabrachion) (Cytotactin) (Neuronectin) (GMEM) (JI) (Miotendinous antigen) (Glioma-associated-extracellular matrix antigen) (GP 150-225) (Tenascin-C) (TN-C)                                                     | TENA_HUMAN  | 240845 | NTTSYVLR                  | R | G | 95.00% | 56.3  | 38.3 | 3.34  | 1 | 0 | 954.49  | 1034 | 1041 | 1034 |
| (P24821) Tenascin precursor (TN) (Hexabrachion) (Cytotactin) (Neuronectin) (GMEM) (JI) (Miotendinous antigen) (Glioma-associated-extracellular matrix antigen) (GP 150-225) (Tenascin-C) (TN-C)                                                     | TENA_HUMAN  | 240845 | VEAAQNLTLPGLSR            | K | A | 95.00% | 81.9  | 38.7 | 3.17  | 1 | 0 | 1469.80 | 1387 | 1400 | 1392 |
| (P24821) Tenascin precursor (TN) (Hexabrachion) (Cytotactin) (Neuronectin) (GMEM) (JI) (Miotendinous antigen) (Glioma-associated-extracellular matrix antigen) (GP 150-225) (Tenascin-C) (TN-C)                                                     | TENA_HUMAN  | 240845 | LLETVEYNISGAER            | R | T | 95.00% | 95.1  | 39.1 | 7.70  | 1 | 0 | 1594.80 | 1478 | 1491 | 1485 |
| (P34059) N-acetylgalactosamine-6-sulfatase precursor (EC 3.1.6.4) (N-acetylgalactosamine-6-sulfate sulfatase) (Galactose-6-sulfate sulfatase) (GalNAc6S sulfatase) (Chondroitin sulfatase)                                                          | GALNS_HUMAN | 58009  | TGEANLTQIYLQEALDFIK       | K | R | 95.00% | 72.4  | 38.3 | 3.96  | 2 | 0 | 2168.11 | 200  | 218  | 204  |
| (P35052) Glypican-1 precursor                                                                                                                                                                                                                       | GPC1_HUMAN  | 61633  | ICPQGYCTCTSEMEENLANR      | R | S | 95.00% | 89.2  | 38.3 | 3.00  | 2 | 0 | 2449.97 | 61   | 80   | 79   |
| (P35052) Glypican-1 precursor                                                                                                                                                                                                                       | GPC1_HUMAN  | 61633  | SFDDHFQHLNLSR             | R | T | 95.00% | 47.7  | 38.6 | 3.28  | 0 | 1 | 1860.82 | 106  | 120  | 116  |
| (P35613) Basigin precursor (Leukocyte activation antigen M6) (Collagenase stimulatory factor) (Extracellular matrix metalloproteinase inducer) (EMMPRIN) (5F7) (Tumor cell-derived collagenase stimulatory factor) (TCSF) (OK blood group antigen)  | BASI_HUMAN  | 42182  | ILLTCLNSDASATEVTGHR       | K | W | 95.00% | 137.0 | 38.2 | 8.46  | 2 | 1 | 1987.98 | 153  | 170  | 160  |
| (P35613) Basigin precursor (Leukocyte activation antigen M6) (Collagenase stimulatory factor) (Extracellular matrix metalloproteinase inducer) (EMMPRIN) (5F7) (Tumor cell-derived collagenase stimulatory factor) (TCSF) (OK blood group antigen)  | BASI_HUMAN  | 42182  | ITDSEDKALMNGSESER         | K | F | 95.00% | 68.1  | 38.6 | 5.29  | 2 | 0 | 1769.79 | 258  | 273  | 268  |
| (P43121) Cell surface glycoprotein MUC18 precursor (Melanoma-associated antigen MUC18) (Melanoma cell adhesion molecule) (Melanoma-associated antigen A32) (S-endo 1 endothelial-associated antigen) (Cell surface glycoprotein P1H12) (CD146 anti) | MUC18_HUMAN | 71589  | CGLSQSQGNLSHVDWFSVHK      | K | E | 95.00% | 0.0   | 0    | 5.52  | 1 | 0 | 2270.03 | 48   | 67   | 56   |
| (P43307) Translocon-associated protein alpha subunit precursor (TRAP-alpha) (Signal sequence receptor alpha subunit) (SSR-alpha)                                                                                                                    | SSRA_HUMAN  | 32218  | YPQDYQFYIGNFTALPLNTVPPQR  | R | Q | 95.00% | 53.7  | 37.1 | 6.64  | 1 | 0 | 3014.49 | 126  | 150  | 136  |
| (P43308) Translocon-associated protein beta subunit precursor (TRAP-beta) (Signal sequence receptor beta subunit) (SSR-beta)                                                                                                                        | SSRB_HUMAN  | 20118  | IAPASNVSHTVVLRPLK         | R | A | 95.00% | 85.5  | 38.7 | 5.96  | 2 | 0 | 1803.05 | 83   | 99   | 88   |
| (P47972) Neuronal pentraxin-2 precursor (NP2) (Neuronal pentraxin II) (NP-II)                                                                                                                                                                       | NPTX2_HUMAN | 47024  | ANVSNAGLPGDFR             | R | E | 95.00% | 33.4  | 39   | 3.89  | 1 | 0 | 1318.64 | 147  | 159  | 148  |
| (P50897) Palmitoyl-protein thioesterase 1 precursor (EC 3.1.2.22) (Palmitoyl-protein hydrolase 1)                                                                                                                                                   | PPT1_HUMAN  | 34176  | NHSIFLADINQER             | R | G | 95.00% | 95.0  | 39.1 | 4.00  | 2 | 2 | 1557.77 | 197  | 209  | 197  |
| (P50897) Palmitoyl-protein thioesterase 1 precursor (EC 3.1.2.22) (Palmitoyl-protein hydrolase 1)                                                                                                                                                   | PPT1_HUMAN  | 34176  | FLNDSIVDPVSEWFGFYR        | K | S | 95.00% | 107.0 | 38.4 | 10.10 | 2 | 0 | 2307.06 | 230  | 248  | 232  |
| (P53634) Dipeptidyl-peptidase 1 precursor (EC 3.4.14.1) (Dipeptidyl-peptidase I) (DPP-I) (DPPI) (Cathepsin C) (Cathepsin J) (Dipeptidyl transferase) [Contains: Dipeptidyl-peptidase 1 exclusion domain chain (Dipeptidyl-peptidase I exclusion dom | CATC_HUMAN  | 51824  | VTTYCNEMTGTGWVHDVLGR      | K | N | 95.00% | 73.3  | 38.3 | 5.35  | 1 | 1 | 2256.01 | 114  | 132  | 119  |
| (P54709) Sodium/potassium-transporting ATPase subunit beta-3 (Sodium/potassium-dependent ATPase beta-3 subunit) (ATPB-3) (CD298 antigen)                                                                                                            | AT1B3_HUMAN | 31496  | FLKPYTLEEQKNLTVCPDGLFEQK  | K | G | 95.00% | 53.1  | 38.4 | 5.48  | 0 | 2 | 2969.50 | 113  | 137  | 124  |
| (Q02809) Procollagen-lysine,2-oxoglutarate 5-dioxygenase 1 precursor (EC 1.14.11.4) (Lysyl hydroxylase 1) (LH1)                                                                                                                                     | PLOD1_HUMAN | 83535  | EQINITLDHR                | R | C | 95.00% | 58.3  | 38.6 | 8.17  | 2 | 0 | 1239.63 | 194  | 203  | 197  |



List of Glycopeptide Identified

|                                                                                                                                                                                                                                      |             |        |                                |   |   |        |       |      |       |   |   |         |      |      |     |      |
|--------------------------------------------------------------------------------------------------------------------------------------------------------------------------------------------------------------------------------------|-------------|--------|--------------------------------|---|---|--------|-------|------|-------|---|---|---------|------|------|-----|------|
| [Q07954] Low-density lipoprotein receptor-related protein 1 precursor (LRP) (Alpha-2-macroglobulin receptor) (A2MR) (Apolipoprotein E receptor) (APOER) (CD91 antigen)                                                               | LRP1_HUMAN  | 504543 | FNSTYEQVTR                     | R | V | 95.00% | 65.9  | 38.8 | 4.80  | 1 | 0 | 1344.64 | 445  | 455  | 446 |      |
| [Q08380] Galectin-3-binding protein precursor (Lectin galactoside-binding soluble 3-binding protein) (Mac-2-binding protein) (Mac-2 BP) (MAC2BP) (Tumor-associated antigen 90K)                                                      | LG3BP_HUMAN | 65314  | ALGFENATQALGR                  | R | A | 95.00% | 67.6  | 39   | 4.66  | 2 | 0 | 1348.69 | 64   | 76   | 69  |      |
| [Q08380] Galectin-3-binding protein precursor (Lectin galactoside-binding soluble 3-binding protein) (Mac-2-binding protein) (Mac-2 BP) (MAC2BP) (Tumor-associated antigen 90K)                                                      | LG3BP_HUMAN | 65314  | YKGLNLTEDTYKPR                 | R | I | 95.00% | 53.7  | 39.2 | 1.77  | 0 | 1 | 1698.87 | 394  | 407  | 398 |      |
| [Q08431] Lactadherin precursor (Milk fat globule-EGF factor 8) (MFG-E8) (HMFG) (Breast epithelial antigen BA46) (MFGM) [Contains: Lactadherin short form; Medin]                                                                     | MFGM_HUMAN  | 43105  | FELLGCELNGCANPLGLKKNNSIPDK     | R | Q | 95.00% | 88.5  | 38.8 | 4.92  | 0 | 1 | 2776.32 | 220  | 244  |     | 238  |
| [Q08431] Lactadherin precursor (Milk fat globule-EGF factor 8) (MFG-E8) (HMFG) (Breast epithelial antigen BA46) (MFGM) [Contains: Lactadherin short form; Medin]                                                                     | MFGM_HUMAN  | 43105  | VAYSNDSANWTEYQDPR              | K | T | 95.00% | 83.5  | 38.8 | 9.57  | 1 | 0 | 2016.86 | 321  | 337  |     | 325  |
| [Q13510] Acid ceramidase precursor (EC 3.5.1.23) (Acylsphingosine deacylase) (N-acylsphingosine amidohydrolase) (AC) (Putative 32 kDa heart protein) (PHP32) [Contains: Acid ceramidase alpha subunit; Acid ceramidase beta subunit] | ASAH1_HUMAN | 44633  | TVLENSTSYEEAK                  | R | N | 95.00% | 86.5  | 38.8 | 3.82  | 2 | 0 | 1471.68 | 255  | 267  |     | 259  |
| [Q13510] Acid ceramidase precursor (EC 3.5.1.23) (Acylsphingosine deacylase) (N-acylsphingosine amidohydrolase) (AC) (Putative 32 kDa heart protein) (PHP32) [Contains: Acid ceramidase alpha subunit; Acid ceramidase beta subunit] | ASAH1_HUMAN | 44633  | TVLENSTSYEEAKNLLTK             | R | T | 95.00% | 98.9  | 38.4 | 5.80  | 2 | 0 | 2041.03 | 255  | 272  |     | 259  |
| [Q14956] Transmembrane glycoprotein NMB precursor (Transmembrane glycoprotein HGFIN)                                                                                                                                                 | GPNMB_HUMAN | 63905  | VSVNTANVTLGPQLMEVTVYR          | R | R | 95.00% | 65.0  | 38.4 | 5.00  | 2 | 0 | 2293.18 | 194  | 214  |     | 200  |
| [Q16363] Laminin alpha-4 chain precursor                                                                                                                                                                                             | LAMA4_HUMAN | 202512 | EQMEVVNMSLSTASDSLTPR           | R | L | 95.00% | 0.0   | 0    | 5.02  | 1 | 0 | 2329.05 | 525  | 545  |     | 531  |
| [Q16610] Extracellular matrix protein 1 precursor (Secretory component p85)                                                                                                                                                          | ECM1_HUMAN  | 60655  | HIPGLIHNMTAR                   | K | C | 95.00% | 37.7  | 39.3 | 4.33  | 3 | 0 | 1376.71 | 437  | 448  |     | 444  |
| [Q16610] Extracellular matrix protein 1 precursor (Secretory component p85)                                                                                                                                                          | ECM1_HUMAN  | 60655  | GQGEQGGTGGTNISSTSEPKKEE        | K | - | 95.00% | 73.9  | 38.9 | 4.80  | 1 | 0 | 2180.94 | 519  | 540  |     | 530  |
| [Q5ZPR3] CD276 antigen precursor (Costimulatory molecule) (B7 homolog 3) (B7-H3) (4lg-B7-H3)                                                                                                                                         | CD276_HUMAN | 57216  | QLVHSFAEQDQGSAYANR             | K | T | 95.00% | 0.0   | 0    | 7.82  | 1 | 0 | 2061.93 | 74   | 92   |     | 91   |
| [Q5ZPR3] CD276 antigen precursor (Costimulatory molecule) (B7 homolog 3) (B7-H3) (4lg-B7-H3)                                                                                                                                         | CD276_HUMAN | 57216  | TALFPDLLAQGNASLR               | R | L | 95.00% | 53.6  | 39.1 | 5.74  | 1 | 0 | 1687.90 | 93   | 108  |     | 104  |
| [Q6UVK1] Chondroitin sulfate proteoglycan 4 precursor (Chondroitin sulfate proteoglycan NG2) (Melanoma chondroitin sulfate proteoglycan) (Melanoma-associated chondroitin sulfate proteoglycan)                                      | CSPG4_HUMAN | 250476 | LGLTPEATNASLLGCMEDLSVNGQR      | R | R | 95.00% | 115.0 | 38   | 7.04  | 3 | 1 | 2648.26 | 340  | 364  |     | 348  |
| [Q6UVK1] Chondroitin sulfate proteoglycan 4 precursor (Chondroitin sulfate proteoglycan NG2) (Melanoma chondroitin sulfate proteoglycan) (Melanoma-associated chondroitin sulfate proteoglycan)                                      | CSPG4_HUMAN | 250476 | VANGSSLVVPGGGQTIDTAVLHLOTNLDIR | R | S | 95.00% | 57.5  | 38.7 | 4.17  | 0 | 2 | 3161.64 | 1129 | 1159 |     | 1131 |
| [Q6UVK1] Chondroitin sulfate proteoglycan 4 precursor (Chondroitin sulfate proteoglycan NG2) (Melanoma chondroitin sulfate proteoglycan) (Melanoma-associated chondroitin sulfate proteoglycan)                                      | CSPG4_HUMAN | 250476 | AGQPATAFSQDLDLGGAVLYSHNGSLSPR  | R | D | 95.00% | 83.7  | 38.5 | 4.28  | 0 | 2 | 3001.47 | 1180 | 1208 |     | 1202 |
| [Q6UVK1] Chondroitin sulfate proteoglycan 4 precursor (Chondroitin sulfate proteoglycan NG2) (Melanoma chondroitin sulfate proteoglycan) (Melanoma-associated chondroitin sulfate proteoglycan)                                      | CSPG4_HUMAN | 250476 | VYHDGSETLTDTSFVLMANASEMDR      | R | Q | 95.00% | 72.7  | 38.1 | 5.43  | 1 | 0 | 2721.17 | 1432 | 1455 |     | 1449 |
| [Q6UVK1] Chondroitin sulfate proteoglycan 4 precursor (Chondroitin sulfate proteoglycan NG2) (Melanoma chondroitin sulfate proteoglycan) (Melanoma-associated chondroitin sulfate proteoglycan)                                      | CSPG4_HUMAN | 250476 | LDPTVLADAGELANR                | R | T | 95.00% | 105.0 | 39.1 | 5.55  | 2 | 0 | 1484.76 | 2063 | 2076 |     | 2075 |
| [Q86YB8] ERO1-like protein beta precursor (EC 1.8.4.-) (ERO1-Lbeta) (Oxidoreductin-1-Lbeta) (Endoplasmic oxidoreductin-1-like protein B)                                                                                             | ERO1B_HUMAN | 53511  | LGAINSTLSNQS                   | K | E | 95.00% | 87.2  | 38.7 | 4.30  | 3 | 0 | 1334.68 | 136  | 148  |     | 145  |
| [Q969P0] Immunoglobulin superfamily member 8 precursor (CD81 partner 3) (Glu-Trip-Ile EWI motif containing protein 2) (EWI-2) (Keratinocytes-associated transmembrane protein 4) (KCT-4) (LIR-D1) (CD316 antigen)                    | IGSF8_HUMAN | 65015  | IGPGEPLLELNCVSGALPPAGR         | R | H | 95.00% | 56.6  | 38.9 | 10.10 | 2 | 0 | 2218.15 | 316  | 337  |     | 327  |
| [Q96AY3] FK506-binding protein 10 precursor (EC 5.2.1.8) (Peptidyl-prolyl cis-trans isomerase) (PPlase) (Rotamase) (65 kDa FK506-binding protein) (FKBP65) (Immunophilin FKBP65)                                                     | FKB10_HUMAN | 64228  | YHYNGTFEDGK                    | R | K | 95.00% | 50.5  | 39.1 | 5.55  | 3 | 0 | 1331.55 | 67   | 77   |     | 70   |
| [Q96AY3] FK506-binding protein 10 precursor (EC 5.2.1.8) (Peptidyl-prolyl cis-trans isomerase) (PPlase) (Rotamase) (65 kDa FK506-binding protein) (FKBP65) (Immunophilin FKBP65)                                                     | FKB10_HUMAN | 64228  | YHYNGTLLDGTSFDTYSVK            | R | G | 95.00% | 114.0 | 38.8 | 8.16  | 2 | 2 | 2169.96 | 179  | 197  |     | 182  |

List of Glycopeptide Identified

|                                                                                                                                                                                                                                         |             |        |                                |   |   |        |       |      |      |   |   |         |     |     |          |
|-----------------------------------------------------------------------------------------------------------------------------------------------------------------------------------------------------------------------------------------|-------------|--------|--------------------------------|---|---|--------|-------|------|------|---|---|---------|-----|-----|----------|
| (Q96AY3) FK506-binding protein 10 precursor (EC 5.2.1.8) (Peptidyl-prolyl cis-trans isomerase) (PPIase) (Rotamase) (65 kDa FK506-binding protein) (FKBP65) (Immunophilin FKBP65)                                                        | FKB10_HUMAN | 64228  | YHNGSLMDGLTFDSSYSR             | R | N | 95.00% | 92.1  | 38.2 | 9.64 | 2 | 1 | 2229.94 | 291 | 309 | 294      |
| (Q96AY3) FK506-binding protein 10 precursor (EC 5.2.1.8) (Peptidyl-prolyl cis-trans isomerase) (PPIase) (Rotamase) (65 kDa FK506-binding protein) (FKBP65) (Immunophilin FKBP65)                                                        | FKB10_HUMAN | 64228  | TLSRSPSETCNETTK                | R | L | 95.00% | 56.5  | 39   | 3.48 | 1 | 0 | 1624.75 | 384 | 397 | 393      |
| (Q96AY3) FK506-binding protein 10 precursor (EC 5.2.1.8) (Peptidyl-prolyl cis-trans isomerase) (PPIase) (Rotamase) (65 kDa FK506-binding protein) (FKBP65) (Immunophilin FKBP65)                                                        | FKB10_HUMAN | 64228  | YHNCSSLLDGLTFTSHDYGAPEQATLGANK | R | V | 95.00% | 99.4  | 38.6 | 8.96 | 0 | 1 | 3473.56 | 404 | 434 | 407      |
| (Q96HE7) ERO1-like protein alpha precursor (EC 1.8.4.-) (ERO1-Lalpha) (Oxidoreductin-1-Lalpha) (Endoplasmic oxidoreductin-1-like protein) (ERO1-L)                                                                                      | ERO1A_HUMAN | 54377  | WGHNITFEQQQR                   | K | F | 95.00% | 59.6  | 38.7 | 5.33 | 2 | 0 | 1416.67 | 277 | 287 | 280      |
| (Q99538) Legumain precursor (EC 3.4.22.34) (Asparaginyl endopeptidase) (Protease, cysteine 1)                                                                                                                                           | LGMN_HUMAN  | 49393  | DLNETIHYMYK                    | K | H | 95.00% | 65.0  | 39   | 4.03 | 4 | 0 | 1427.65 | 165 | 175 | 167      |
| (Q99988) Growth/differentiation factor 15 precursor (GDF-15) (Placental bone morphogenic protein) (Placental TGF-beta) (Macrophage inhibitory cytokine 1) (MIC-1) (Prostate differentiation factor) (NSAID-regulated protein 1) (NRG-1) | GDF15_HUMAN | 34151  | LRANQSWEDSNTDLVPAPAVR          | R | I | 95.00% | 81.5  | 38.2 | 4.12 | 4 | 4 | 2340.16 | 67  | 87  | 70       |
| (Q99988) Growth/differentiation factor 15 precursor (GDF-15) (Placental bone morphogenic protein) (Placental TGF-beta) (Macrophage inhibitory cytokine 1) (MIC-1) (Prostate differentiation factor) (NSAID-regulated protein 1) (NRG-1) | GDF15_HUMAN | 34151  | ANQSWEDSNTDLVPAPAVR            | R | I | 95.00% | 75.3  | 38.2 | 8.00 | 2 | 0 | 2071.96 | 69  | 87  | 70       |
| (Q9HDC9) Adipocyte plasma membrane-associated protein (BSCV protein)                                                                                                                                                                    | APMAP_HUMAN | 46464  | AGPNGTLFVADAYK                 | R | G | 95.00% | 87.2  | 38.7 | 7.38 | 1 | 0 | 1424.71 | 157 | 170 | 160      |
| (Q9NYU2) UDP-glucose:glycoprotein glucosyltransferase 1 precursor (EC 2.4.1.-) (UDP-glucose ceramide glucosyltransferase-like 1) (UDP-Glc:glycoprotein glucosyltransferase) (HUGT1)                                                     | UGGG1_HUMAN | 174965 | GTEVNTTVIGENDPIDEVQGLFGK       | K | L | 95.00% | 75.3  | 37.5 | 7.32 | 1 | 0 | 2680.30 | 241 | 265 | 245      |
| (Q9P2B2) Prostaglandin F2 receptor negative regulator precursor (Prostaglandin F2-alpha receptor regulatory protein) (Prostaglandin F2-alpha receptor-associated protein) (CD9 partner 1) (CD9P-1) (CD315 antigen)                      | FPRP_HUMAN  | 98538  | ELDLTCNITDR                    | K | A | 95.00% | 84.8  | 38.5 | 3.15 | 2 | 0 | 1451.67 | 294 | 305 | 300      |
| (Q9UBG0) Macrophage mannose receptor 2 precursor (Urokinase receptor-associated protein) (Endocytic receptor 180) (CD280 antigen)                                                                                                       | MRC2_HUMAN  | 166637 | VTPACNTSLPAQR                  | R | W | 95.00% | 46.5  | 39   | 1.92 | 1 | 0 | 1415.70 | 64  | 76  | 69       |
| (Q9UHG3) Prenylcysteine oxidase precursor (EC 1.8.3.5) (PCL1)                                                                                                                                                                           | PCYOX_HUMAN | 56595  | GELNTSIFSSRPIDK                | K | F | 95.00% | 73.8  | 39.1 | 4.68 | 1 | 0 | 1664.85 | 350 | 364 | 353      |
| (Q9UHL4) Dipeptidyl-peptidase 2 precursor (EC 3.4.14.2) (Dipeptidyl-peptidase II) (DPP II) (Dipeptidyl aminopeptidase II) (Quiescent cell proline dipeptidase) (Dipeptidyl peptidase 7)                                                 | DPP2_HUMAN  | 54311  | ALAGLVYNASGSEHCYDIYR           | R | L | 95.00% | 108.0 | 38.2 | 8.92 | 2 | 1 | 2260.03 | 308 | 327 | 315      |
| (Q9Y4L1) 150 kDa oxygen-regulated protein precursor (Orp150) (Hypoxia up-regulated 1)                                                                                                                                                   | OXR_P_HUMAN | 111319 | VFGSQNLTTVK                    | R | L | 95.00% | 78.9  | 39.3 | 5.35 | 3 | 0 | 1194.64 | 510 | 520 | 515      |
| (Q9Y4L1) 150 kDa oxygen-regulated protein precursor (Orp150) (Hypoxia up-regulated 1)                                                                                                                                                   | OXR_P_HUMAN | 111319 | LSALDNLNHSMSFLK                | R | G | 95.00% | 64.2  | 38.9 | 4.89 | 3 | 1 | 1819.93 | 822 | 837 | 830      |
| (Q9Y4L1) 150 kDa oxygen-regulated protein precursor (Orp150) (Hypoxia up-regulated 1)                                                                                                                                                   | OXR_P_HUMAN | 111319 | VINETWAWK                      | K | N | 95.00% | 60.0  | 39.2 | 3.25 | 1 | 0 | 1147.58 | 860 | 868 | 862      |
| (Q9Y4L1) 150 kDa oxygen-regulated protein precursor (Orp150) (Hypoxia up-regulated 1)                                                                                                                                                   | OXR_P_HUMAN | 111319 | VINETWAWKNATLAEQAK             | K | L | 95.00% | 91.3  | 38.9 | 5.27 | 1 | 2 | 2075.05 | 860 | 877 | 862, 869 |
| (Q9Y4L1) 150 kDa oxygen-regulated protein precursor (Orp150) (Hypoxia up-regulated 1)                                                                                                                                                   | OXR_P_HUMAN | 111319 | AEPPLNASASDQGEK                | R | V | 95.00% | 78.6  | 39   | 8.18 | 3 | 0 | 1514.70 | 926 | 940 | 931      |
| (Q9Y6C2) EMILIN-1 precursor (Elastin microfibril interface-located protein 1) (Elastin microfibril interfacier 1)                                                                                                                       | EMIL1_HUMAN | 106677 | ETNTTSQMQAALLEK                | R | L | 95.00% | 82.0  | 38.7 | 6.92 | 2 | 0 | 1681.80 | 764 | 778 | 766      |
| (Q9Y6C2) EMILIN-1 precursor (Elastin microfibril interface-located protein 1) (Elastin microfibril interfacier 1)                                                                                                                       | EMIL1_HUMAN | 106677 | LGALNSSLQLLEDR                 | R | L | 95.00% | 95.5  | 38.7 | 4.01 | 2 | 0 | 1529.82 | 790 | 803 | 794      |
