# Supplementary material
Source: PubMed Central journal article supplement (PMC2735218)
Supplement: NIHMS132564-supplement-8_si_008.pdf [file NIHMS132564-supplement-8_si_008.pdf]

## Glycoproteins Identified by a Single Glycopeptide

| Swiss-Prot Accession Number | Detected in ARO | Detected in DRO-1 | Detected in XTC-1 | Detected in TPC-1 | Detected in FTC-133 | Protein Name                                                                                                                                                                                                         | Subcellular location                                                                                        | #Trans-membrane regions | Cd Antigen Name |
|-----------------------------|-----------------|-------------------|-------------------|-------------------|---------------------|----------------------------------------------------------------------------------------------------------------------------------------------------------------------------------------------------------------------|-------------------------------------------------------------------------------------------------------------|-------------------------|-----------------|
| P30501                      |                 |                   |                   | √                 |                     | HLA class I histocompatibility antigen, Cw-2 alpha chain, MHC class I antigen Cw*2                                                                                                                                   | Membrane, Single-pass type I membrane protein                                                               | 1                       |                 |
| P04222                      |                 |                   |                   | √                 |                     | HLA class I histocompatibility antigen, Cw-3 alpha chain, MHC class I antigen Cw*3                                                                                                                                   | Membrane, Single-pass type I membrane protein                                                               | 1                       |                 |
| O43854                      |                 |                   |                   | √                 |                     | EGF-like repeat and discoidin I-like domain-containing protein 3, EGF-like repeats and discoidin I-like domains protein 3, Developmentally-regulated endothelial cell locus 1 protein, Integrin-binding protein DEL1 | Secreted                                                                                                    | 0                       |                 |
| P52803                      |                 |                   |                   | √                 |                     | Ephrin-A5, EPH-related receptor tyrosine kinase ligand 7, LERK-7, AL-1                                                                                                                                               | Cell membrane, Lipid-anchor, GPI-anchor, Compartmentalized in discrete caveolae-like membrane microdomains. | 0                       |                 |
| P54852                      |                 |                   |                   | √                 |                     | Epithelial membrane protein 3, EMP-3, Protein YMP, Hematopoietic neural membrane protein, HNMP-1                                                                                                                     | Membrane, Multi-pass membrane protein                                                                       | 4                       |                 |
| Q9Y4K0                      |                 |                   |                   | √                 |                     | Lysyl oxidase homolog 2, Lysyl oxidase-like protein 2, Lysyl oxidase-related protein 2, Lysyl oxidase-related protein WS9-14                                                                                         | Secreted, Extracellular space                                                                               | 0                       |                 |
| P41271                      |                 |                   |                   | √                 |                     | Neuroblastoma suppressor of tumorigenicity 1, Zinc finger protein DAN, N03, DAN domain family member 1                                                                                                               | Secreted                                                                                                    | 0                       |                 |
| Q6UX71                      |                 |                   |                   | √                 |                     | Plexin domain-containing protein 2, Tumor endothelial marker 7-related protein                                                                                                                                       | Membrane, Single-pass type I membrane protein                                                               | 1                       |                 |
| Q06481                      |                 |                   | √                 |                   |                     | Amyloid-like protein 2, Amyloid protein homolog, APPH, CDEI box-binding protein, CDEBP                                                                                                                               | Cell membrane, Single-pass type I membrane protein, Nucleus                                                 | 1                       |                 |
| Q9UHX3                      | √               |                   | √                 |                   |                     | EGF-like module-containing mucin-like hormone receptor-like 2, EGF-like module EMR2                                                                                                                                  | Cell membrane, Multi-pass membrane protein                                                                  | 7                       | CD312           |
| Q9Y653                      |                 |                   | √                 |                   |                     | G-protein coupled receptor 56, Protein TM7XN1                                                                                                                                                                        | Cell membrane, Multi-pass membrane protein                                                                  | 7                       |                 |
| P02790                      | √               | √                 | √                 | √                 |                     | Hemopexin, Beta-1B-glycoprotein                                                                                                                                                                                      | Secreted                                                                                                    | 0                       |                 |
| O95274                      |                 |                   | √                 |                   |                     | Ly6/PLAUR domain-containing protein 3, GPI-anchored metastasis-associated protein C4.4A homolog, Matrigel-induced gene C4 protein, MIG-C4                                                                            | Cell membrane, Lipid-anchor, GPI-anchor                                                                     | 0                       |                 |
| P05154                      |                 | √                 |                   |                   |                     | Plasma serine protease inhibitor, Serpin A5, Protein C inhibitor, PCI, Plasminogen activator inhibitor 3, PAI-3, PAI3, Acrosomal serine protease inhibitor                                                           | Secreted                                                                                                    | 0                       |                 |
| P47972                      |                 | √                 |                   |                   |                     | Neuronal pentraxin-2, Neuronal pentraxin II                                                                                                                                                                          | Secreted                                                                                                    | 0                       |                 |
| P43308                      |                 | √                 |                   | √                 |                     | Translocon-associated protein subunit beta, TRAP-beta, Signal sequence receptor subunit beta, SSR-beta                                                                                                               | Endoplasmic reticulum membrane, Single-pass type I membrane protein                                         | 1                       |                 |
| O95857                      |                 | √                 |                   |                   |                     | Tetraspanin-13, Tspan-13, Transmembrane 4 superfamily member 13, Tetraspan NET-6                                                                                                                                     | Membrane, Multi-pass membrane protein                                                                       | 4                       |                 |
| P16870                      |                 | √                 | √                 | √                 |                     | Carboxypeptidase E, CPE, Carboxypeptidase H, CPH, Enkephalin convertase, Prohormone-processing carboxypeptidase                                                                                                      | Secreted, Secretory granules of pancreatic islets, adrenal gland, pituitary and brain.                      | 0                       |                 |
| O00592                      | √               |                   |                   |                   |                     | Podocalyxin-like protein 1                                                                                                                                                                                           | Membrane, Single-pass type I membrane protein                                                               | 1                       |                 |
| P55011                      | √               |                   |                   |                   |                     | Solute carrier family 12 member 2, Bumetanide-sensitive sodium-(potassium)-chloride cotransporter 1, Basolateral Na-K-Cl symporter                                                                                   | Membrane, Multi-pass membrane protein                                                                       | 12                      |                 |
