# Supplementary material
Source: PubMed Central journal article supplement (PMC2735218)
Supplement: NIHMS132564-supplement-9_si_009.pdf [file NIHMS132564-supplement-9_si_009.pdf]

## Common Glycoproteins Identified in All Thyroid Cancer Cells

| Swiss-Prot Accession Number | Average Spectra Counts | Protein Name                                                                                                                                                                                      | Subcellular location                                                                                      | #Trans-membrane regions | Cd Antigen Name | Gene Name                       |
|-----------------------------|------------------------|---------------------------------------------------------------------------------------------------------------------------------------------------------------------------------------------------|-----------------------------------------------------------------------------------------------------------|-------------------------|-----------------|---------------------------------|
| O00115                      | 30.1                   | Deoxyribonuclease-2-alpha, Deoxyribonuclease II alpha, DNase II alpha, Acid DNase, Lysosomal DNase II, R31240_2                                                                                   | Lysosome                                                                                                  | 0                       |                 | DNASE2, DNASE2A, DNL2           |
| O00754                      | 27.7                   | Lysosomal alpha-mannosidase, Laman, Lysosomal acid alpha-mannosidase, Mannosidase alpha class 2B member 1, Mannosidase, alpha B                                                                   | Lysosome                                                                                                  | 0                       |                 | MAN2B1, LAMAN, MANB             |
| O14773                      | 87.2                   | Tripeptidyl-peptidase 1, TPP-1, Tripeptidyl-peptidase I, TPP-I, Tripeptidyl aminopeptidase, Lysosomal pepstatin-insensitive protease, LPIC, Cell growth-inhibiting gene 1 protein                 | Lysosome, Melanosome, Identified by mass spectrometry in melanosome fractions from stage I to stage IV.   | 0                       |                 | TPP1, CLN2, GIG1, UNQ267/PRO304 |
| P01033                      | 12.5                   | Metalloproteinase inhibitor 1, Tissue inhibitor of metalloproteinases, TIMP-1, Erythroid-potentiating activity, EPA, Fibroblast collagenase inhibitor, Collagenase inhibitor                      | Secreted                                                                                                  | 0                       |                 | TIMP1                           |
| P04062                      | 56.1                   | Glucosylceramidase, Beta-glucocerebrosidase, Acid beta-glucosidase, D-glucosyl-N-acylsphingosine glucohydrolase, Alglucerase, Imiglucerase                                                        | Lysosome membrane, Peripheral membrane protein, Interaction with saposin-C promotes membrane association. | 0                       |                 | GBA, GC, GLUC                   |
| P06756                      | 117.1                  | Integrin alpha-V, Vitronectin receptor subunit alpha                                                                                                                                              | Cell membrane, Single-pass type I membrane protein                                                        | 1                       | CD51            | ITGAV, MSK8, VNRA               |
| P06865                      | 117.1                  | Beta-hexosaminidase subunit alpha, N-acetyl-beta-glucosaminidase subunit alpha, Beta-N-acetylhexosaminidase subunit alpha, Hexosaminidase subunit A                                               | Lysosome                                                                                                  | 0                       |                 | HEXA                            |
| P07339                      | 504.1                  | Cathepsin D                                                                                                                                                                                       | Lysosome, Melanosome, Identified by mass spectrometry in melanosome fractions from stage I to stage IV.   | 0                       |                 | CTSD, CPSD                      |
| P07602                      | 526.1                  | Proactivator polypeptide                                                                                                                                                                          | Lysosome                                                                                                  | 0                       |                 | PSAP, GLBA, SAP1                |
| P07686                      | 137.2                  | Beta-hexosaminidase subunit beta, N-acetyl-beta-glucosaminidase subunit beta, Beta-N-acetylhexosaminidase subunit beta, Hexosaminidase subunit B, Cervical cancer proto-oncogene 7 protein, HCC-7 | Lysosome                                                                                                  | 0                       |                 | HEXB, HCC7                      |

## Common Glycoprotein in All

|        |       |                                                                                                                                                                                                                                                                 |                                                                                                                                                                                                                                                  |   |        |               |
|--------|-------|-----------------------------------------------------------------------------------------------------------------------------------------------------------------------------------------------------------------------------------------------------------------|--------------------------------------------------------------------------------------------------------------------------------------------------------------------------------------------------------------------------------------------------|---|--------|---------------|
| P07858 | 146   | Cathepsin B, Cathepsin B1, APP secretase, APPS                                                                                                                                                                                                                  | Lysosome, Melanosome, Identified by mass spectrometry in melanosome fractions from stage I to stage IV.                                                                                                                                          | 0 |        | CTSB, CPSB    |
| P07942 | 73.7  | Laminin subunit beta-1, Laminin B1 chain                                                                                                                                                                                                                        | Secreted, Extracellular space, Extracellular matrix, Basement membrane, Major component.                                                                                                                                                         | 0 |        | LAMB1         |
| P08174 | 14    | Complement decay-accelerating factor                                                                                                                                                                                                                            | Cell membrane, Single-pass type I membrane protein, Cell membrane, Lipid-anchor, GPI-anchor                                                                                                                                                      | 0 | CD55   | CD55, CR, DAF |
| P10253 | 179.2 | Lysosomal alpha-glucosidase, Acid maltase, Aglucosidase alfa                                                                                                                                                                                                    | Lysosome                                                                                                                                                                                                                                         | 0 |        | GAA           |
| P10619 | 97.9  | Lysosomal protective protein, Cathepsin A, Carboxypeptidase C, Protective protein for beta-galactosidase                                                                                                                                                        | Lysosome                                                                                                                                                                                                                                         | 0 |        | CTSA, PPGB    |
| P11117 | 16.5  | Lysosomal acid phosphatase, LAP                                                                                                                                                                                                                                 | Lysosome membrane, Single-pass membrane protein, Lysosome lumen, The soluble form arises by proteolytic processing of the membrane-bound form.                                                                                                   | 1 |        | ACP2          |
| P11279 | 44    | Lysosome-associated membrane glycoprotein 1, LAMP-1, CD107 antigen-like family member A                                                                                                                                                                         | Cell membrane, Single-pass type I membrane protein, Endosome membrane, Single-pass type I membrane protein, Lysosome membrane, Single-pass type I membrane protein, This protein shuttles between lysosomes, endosomes, and the plasma membrane. | 1 | CD107a | LAMP1         |
| P11717 | 15.9  | Cation-independent mannose-6-phosphate receptor, CI Man-6-P receptor, CI-MPR, M6PR, Insulin-like growth factor 2 receptor, Insulin-like growth factor II receptor, IGF-II receptor, M6P/IGF2 receptor, M6P/IGF2R, 300 kDa mannose 6-phosphate receptor, MPR 300 | Lysosome membrane, Single-pass type I membrane protein                                                                                                                                                                                           | 1 | CD222  | IGF2R, MPRI   |
| P13284 | 22.8  | Gamma-interferon-inducible lysosomal thiol reductase, Gamma-interferon-inducible protein IP-30                                                                                                                                                                  | Lysosome                                                                                                                                                                                                                                         | 0 |        | IFI30, GILT   |
| P13473 | 32.6  | Lysosome-associated membrane glycoprotein 2, LAMP-2, CD107 antigen-like family member B                                                                                                                                                                         | Cell membrane, Single-pass type I membrane protein, Endosome membrane, Single-pass type I membrane protein, Lysosome membrane, Single-pass type I membrane protein, This protein shuttles between lysosomes, endosomes, and the plasma membrane. | 1 | CD107b | LAMP2         |

## Common Glycoprotein in All

|        |       |                                                                                                                                                                                                                                             |                                                                                                                                                                                                         |   |       |                                      |
|--------|-------|---------------------------------------------------------------------------------------------------------------------------------------------------------------------------------------------------------------------------------------------|---------------------------------------------------------------------------------------------------------------------------------------------------------------------------------------------------------|---|-------|--------------------------------------|
| P13987 | 150.9 | CD59 glycoprotein, Membrane attack complex inhibition factor, MACIF, MAC-inhibitory protein, MAC-IP, Protectin, MEM43 antigen, Membrane inhibitor of reactive lysis, MIRL, 20 kDa homologous restriction factor, HRF-20, HRF20, 1F5 antigen | Cell membrane, Lipid-anchor, GPI-anchor, Secreted, Soluble form found in a number of tissues.                                                                                                           | 0 | CD59  | CD59, MIC11, MIN1, MIN2, MIN3, MSK21 |
| P14314 | 161   | Glucosidase 2 subunit beta, Glucosidase II subunit beta, Protein kinase C substrate, 60.1 kDa protein, heavy chain, PKCSH, 80K-H protein                                                                                                    | Endoplasmic reticulum                                                                                                                                                                                   | 0 |       | PRKCSH, G19P1                        |
| P15289 | 44.3  | Arylsulfatase A, ASA, Cerebroside-sulfatase                                                                                                                                                                                                 | Lysosome                                                                                                                                                                                                | 0 |       | ARSA                                 |
| P15586 | 114.5 | N-acetylglucosamine-6-sulfatase, G6S, Glucosamine-6-sulfatase                                                                                                                                                                               | Lysosome                                                                                                                                                                                                | 0 |       | GNS                                  |
| P16070 | 104.7 | CD44 antigen, Phagocytic glycoprotein I, PGP-1, HUTCH-I, Extracellular matrix receptor-III, ECMR-III, GP90 lymphocyte homing/adhesion receptor, Hermes antigen, Hyaluronate receptor, Heparan sulfate proteoglycan, Epican, CDw44           | Cell membrane, Single-pass type I membrane protein                                                                                                                                                      | 1 | CD44  | CD44, LHR, MDU2, MDU3, MIC4          |
| P16278 | 63.7  | Beta-galactosidase, Acid beta-galactosidase, Lactase, Elastin receptor 1                                                                                                                                                                    | Lysosome, Cytoplasm, Perinuclear region, Localized to the perinuclear area of the cytoplasm but not to lysosomes.                                                                                       | 0 |       | GLB1, ELNR1                          |
| P17050 | 45.8  | Alpha-N-acetylgalactosaminidase, Alpha-galactosidase B                                                                                                                                                                                      | Lysosome                                                                                                                                                                                                | 0 |       | NAGA                                 |
| P17900 | 21.9  | Ganglioside GM2 activator, GM2-AP, Cerebroside sulfate activator protein, Shingolipid activator protein 3, SAP-3                                                                                                                            | Lysosome                                                                                                                                                                                                | 0 |       | GM2A                                 |
| P18084 | 20.1  | Integrin beta-5                                                                                                                                                                                                                             | Cell membrane, Single-pass type I membrane protein                                                                                                                                                      | 1 |       | ITGB5                                |
| P20933 | 19.8  | N(4)-(beta-N-acetylglucosaminyl)-L-asparaginase, Glycosylasparaginase, Aspartylglucosaminidase, AGA, N4-(N-acetyl-beta-glucosaminyl)-L-asparagine amidase                                                                                   | Lysosome                                                                                                                                                                                                | 0 |       | AGA                                  |
| P21589 | 40.7  | 5'-nucleotidase, Ecto-5'-nucleotidase, 5'-NT                                                                                                                                                                                                | Cell membrane, Lipid-anchor, GPI-anchor                                                                                                                                                                 | 0 | CD73  | NT5E, NT5, NTE                       |
| P34059 | 26.6  | N-acetylgalactosamine-6-sulfatase, N-acetylgalactosamine-6-sulfate sulfatase, Galactose-6-sulfate sulfatase, GalNAc6S sulfatase, Chondroitinsulfatase, Chondroitinase                                                                       | Lysosome                                                                                                                                                                                                | 0 |       | GALNS                                |
| P35613 | 75.3  | Basigin, Leukocyte activation antigen M6, Collagenase stimulatory factor, Extracellular matrix metalloproteinase inducer, EMMPRIN, 5F7, Tumor cell-derived collagenase stimulatory factor, TCSF, OK blood group antigen                     | Cell membrane, Single-pass type I membrane protein, Melanosome, Colocalizes with SLC16A1 and SLC16A8 (By similarity). Identified by mass spectrometry in melanosome fractions from stage I to stage IV. | 1 | CD147 | BSG, UNQ6505/P RO21383               |

## Common Glycoprotein in All

|        |       |                                                                                                                                                                                                                |                                                                                                                                                                                                                                             |    |       |                                      |
|--------|-------|----------------------------------------------------------------------------------------------------------------------------------------------------------------------------------------------------------------|---------------------------------------------------------------------------------------------------------------------------------------------------------------------------------------------------------------------------------------------|----|-------|--------------------------------------|
| P43121 | 61.5  | Cell surface glycoprotein MUC18, Melanoma-associated antigen MUC18, Melanoma cell adhesion molecule, Melanoma-associated antigen A32, S-endo 1 endothelial-associated antigen, Cell surface glycoprotein P1H12 | Cell membrane, Single-pass type I membrane protein                                                                                                                                                                                          | 1  | CD146 | MCAM, MUC18                          |
| P50897 | 50.3  | Palmitoyl-protein thioesterase 1, PPT-1, Palmitoyl-protein hydrolase 1                                                                                                                                         | Lysosome                                                                                                                                                                                                                                    | 0  |       | PPT1, PPT                            |
| P53634 | 58.8  | Dipeptidyl-peptidase 1, Dipeptidyl-peptidase I, DPP-I, DPPI, Cathepsin C, Cathepsin J, Dipeptidyl transferase                                                                                                  | Lysosome                                                                                                                                                                                                                                    | 0  |       | CTSC, CPPI                           |
| P61916 | 105.6 | Epididymal secretory protein E1, Niemann-Pick disease type C2 protein, hE1                                                                                                                                     | Secreted                                                                                                                                                                                                                                    | 0  |       | NPC2                                 |
| Q02809 | 55.6  | Procollagen-lysine,2-oxoglutarate 5-dioxygenase 1, Lysyl hydroxylase 1, LH1                                                                                                                                    | Rough endoplasmic reticulum membrane, Peripheral membrane protein                                                                                                                                                                           | 0  |       | PLOD1, LLH, PLOD                     |
| Q08380 | 104.9 | Galectin-3-binding protein, Lectin galactoside-binding soluble 3-binding protein, Mac-2-binding protein, Mac-2 BP, MAC2BP, Tumor-associated antigen 90K, Basement membrane autoantigen p105                    | Secreted, Secreted, Extracellular space, Extracellular matrix                                                                                                                                                                               | 0  |       | LGALS3BP, M2BP                       |
| Q13510 | 40    | Acid ceramidase, AC, Acylsphingosine deacylase, N-acylsphingosine amidohydrolase, Putative 32 kDa heart protein, PHP32                                                                                         | Lysosome                                                                                                                                                                                                                                    | 0  |       | ASAH1, ASAH                          |
| Q15758 | 7.1   | Neutral amino acid transporter B(0), ATB(0), Sodium dependent neutral amino acid transporter type 2, RD114/simian type D retrovirus receptor, Baboon M7 virus receptor, Solute carrier family 1 member 5       | Cell membrane, Multi-pass membrane protein, Melanosome, Identified by mass spectrometry in melanosome fractions from stage I to stage IV.                                                                                                   | 10 |       | SLC1A5, ASCT2, M7V1, RDR, RDRC       |
| Q5ZPR3 | 19.8  | CD276 antigen, Costimulatory molecule, B7 homolog 3, B7-H3, 4lg-B7-H3                                                                                                                                          | Cell membrane, Single-pass type I membrane protein                                                                                                                                                                                          | 1  | CD276 | CD276, B7H3, PSEC0249, UNQ309/PRO352 |
| Q8NBJ7 | 45.8  | Sulfatase-modifying factor 2, C-alpha-formylglycine-generating enzyme 2                                                                                                                                        | Endoplasmic reticulum lumen                                                                                                                                                                                                                 | 0  |       | SUMF2, PSEC0171, UNQ1968/PRO4500     |
| Q8NCC3 | 18.3  | 1-O-acylceramide synthase, ACS, Lysosomal phospholipase A2, Lysophospholipase 3, LPLA2, LCAT-like lysophospholipase, LLPL                                                                                      | Lysosome, Secreted                                                                                                                                                                                                                          | 0  |       | LYPLA3, UNQ341/PRO540                |
| Q92820 | 92.5  | Gamma-glutamyl hydrolase, Gamma-Glu-X carboxypeptidase, Conjugase, GH                                                                                                                                          | Secreted, Extracellular space, Lysosome, Melanosome, While its intracellular location is primarily the lysosome, most of the enzyme activity is secreted. Identified by mass spectrometry in melanosome fractions from stage I to stage IV. | 0  |       | GGH                                  |

## Common Glycoprotein in All

|        |       |                                                                                                                                                                             |                                                                                                                                                                                                                                                               |   |       |                                        |
|--------|-------|-----------------------------------------------------------------------------------------------------------------------------------------------------------------------------|---------------------------------------------------------------------------------------------------------------------------------------------------------------------------------------------------------------------------------------------------------------|---|-------|----------------------------------------|
| Q96HE7 | 166.6 | ERO1-like protein alpha, ERO1-Lalpha, ERO1-L, Oxidoreductin-1-Lalpha, Endoplasmic oxidoreductin-1-like protein                                                              | Endoplasmic reticulum membrane, Peripheral membrane protein, The association with TXNDC4 is essential for its retention in the endoplasmic reticulum.                                                                                                         | 0 |       | ERO1L, UNQ434/PRO865                   |
| Q99519 | 45.7  | Sialidase-1, Lysosomal sialidase, N-acetyl-alpha-neuraminidase 1, Acetylneuraminyl hydrolase, G9 sialidase                                                                  | Lysosome membrane, Peripheral membrane protein, Lysosome lumen, Cell membrane, Cytoplasmic vesicle, Localized not only on the inner side of the lysosomal membrane and in the lysosomal lumen, but also on the plasma membrane and in intracellular vesicles. | 0 |       | NEU1, NANH                             |
| Q9P2B2 | 8.9   | Prostaglandin F2 receptor negative regulator, Prostaglandin F2-alpha receptor regulatory protein, Prostaglandin F2-alpha receptor-associated protein, CD9 partner 1, CD9P-1 | Endoplasmic reticulum membrane, Single-pass type I membrane protein, Golgi apparatus, trans-Golgi network membrane, Single-pass type I membrane protein                                                                                                       | 1 | CD315 | PTGFRN, CD9P1, FPRP, KIAA1436          |
| Q9UBR2 | 85.7  | Cathepsin Z, Cathepsin X, Cathepsin P                                                                                                                                       | Lysosome                                                                                                                                                                                                                                                      | 0 |       | CTSZ                                   |
| Q9UHG3 | 21.7  | Prenylcysteine oxidase 1, Prenylcysteine lyase                                                                                                                              | Lysosome                                                                                                                                                                                                                                                      | 0 |       | PCYOX1, KIAA0908, PCL1, UNQ597/PRO1183 |
| Q9UHL4 | 79.1  | Dipeptidyl-peptidase 2, Dipeptidyl-peptidase II, DPP II, Dipeptidyl aminopeptidase II, Quiescent cell proline dipeptidase, Dipeptidyl peptidase 7                           | Lysosome, Cytoplasmic vesicle                                                                                                                                                                                                                                 | 0 |       | DPP7, DPP2, QPP                        |
| Q9Y4L1 | 285.7 | Hypoxia up-regulated protein 1, 150 kDa oxygen-regulated protein, Orp150                                                                                                    | Endoplasmic reticulum lumen                                                                                                                                                                                                                                   | 0 |       | HYOU1, ORP150                          |

## Unique Glycoproteins Identified in FTC-133 Cell Line

| Swiss-Prot Accession Number | FTC-p16 Spectra Counts | FTC-p17 Spectra Counts | Protein Name                                                                                                                                                    | Subcellular location                                                                                                                                         | #Trans-membrane regions | Cd Antigen Name | Gene Name                  |
|-----------------------------|------------------------|------------------------|-----------------------------------------------------------------------------------------------------------------------------------------------------------------|--------------------------------------------------------------------------------------------------------------------------------------------------------------|-------------------------|-----------------|----------------------------|
| P04439                      | 12                     |                        | HLA class I histocompatibility antigen, A-3 alpha chain, MHC class I antigen A*3                                                                                | Membrane, Single-pass type I membrane protein                                                                                                                | 1                       |                 | HLA-A, HLAA                |
| P18827                      | 16                     | 10                     | Syndecan-1, SYND1                                                                                                                                               | Membrane, Single-pass type I membrane protein                                                                                                                | 1                       | CD138           | SDC1, SDC                  |
| P49755                      | 13                     |                        | Transmembrane emp24 domain-containing protein 10, 21 kDa transmembrane-trafficking protein, Transmembrane protein Tmp21, Tmp-21-I, p24delta, S31III125, S31I125 | Golgi apparatus membrane, Single-pass type I membrane protein, Melanosome, Identified by mass spectrometry in melanosome fractions from stage I to stage IV. | 1                       |                 | TMED10, TMP21              |
| P55290                      | 19                     | 7                      | Cadherin-13, Truncated cadherin, T-cadherin, T-cad, Heart cadherin, H-cadherin, P105                                                                            | Cell membrane, Lipid-anchor, GPI-anchor                                                                                                                      | 0                       |                 | CDH13, CDHH                |
| Q04941                      | 6                      |                        | Proteolipid protein 2, Intestinal membrane A4 protein, Differentiation-dependent protein A4                                                                     | Membrane, Multi-pass membrane protein                                                                                                                        | 4                       |                 | PLP2, A4                   |
| Q9BVK6                      | 10                     |                        | Transmembrane emp24 domain-containing protein 9, Glycoprotein 25L2                                                                                              | Endoplasmic reticulum membrane, Single-pass type I membrane protein                                                                                          | 1                       |                 | TMED9, GP25L2              |
| Q9UBP4                      | 6                      | 6                      | Dickkopf-related protein 3, Dickkopf-3, Dkk-3, hDkk-3                                                                                                           | Secreted                                                                                                                                                     | 0                       |                 | DKK3, REIC, UNQ258/PR O295 |

## Unique Proteins Identified in TPC-1 Cell Line

| Swiss-Prot Accession Number | TPC-p13 Spectra Counts | TPC-p15 Spectra Counts | Protein Name                                                                                                            | Subcellular location                                                                                                                                                                                                                                                                                                                                                                | #Trans-membrane regions | Cd Antigen Name | Gene Name                       |
|-----------------------------|------------------------|------------------------|-------------------------------------------------------------------------------------------------------------------------|-------------------------------------------------------------------------------------------------------------------------------------------------------------------------------------------------------------------------------------------------------------------------------------------------------------------------------------------------------------------------------------|-------------------------|-----------------|---------------------------------|
| O14786                      |                        | 9                      | Neuropilin-1, Vascular endothelial cell growth factor 165 receptor                                                      | Cell membrane, Single-pass type I membrane protein, Secreted                                                                                                                                                                                                                                                                                                                        | 1                       | CD304           | NRP1, NRP, VEGF165R             |
| P01024                      |                        | 5                      | Complement C3, C3 and PZP-like alpha-2-macroglobulin domain-containing protein 1                                        | Secreted                                                                                                                                                                                                                                                                                                                                                                            | 0                       |                 | C3, CPAMD1                      |
| P05997                      | 10                     | 9                      | Collagen alpha-2(V) chain                                                                                               | Secreted, Extracellular space, Extracellular matrix                                                                                                                                                                                                                                                                                                                                 | 0                       |                 | COL5A2                          |
| P20645                      |                        | 2                      | Cation-dependent mannose-6-phosphate receptor, CD Man-6-P receptor, CD-MPR, 46 kDa mannose 6-phosphate receptor, MPR 46 | Lysosome membrane, Single-pass type I membrane protein                                                                                                                                                                                                                                                                                                                              | 1                       |                 | M6PR, MPR46, MPRD               |
| P28827                      | 2                      | 14                     | Receptor-type tyrosine-protein phosphatase mu, Protein-tyrosine phosphatase mu, R-PTP-mu                                | Membrane, Single-pass type I membrane protein                                                                                                                                                                                                                                                                                                                                       | 1                       |                 | PTPRM, PTPRL1                   |
| P30508                      | 31                     | 5                      | HLA class I histocompatibility antigen, Cw-12 alpha chain, MHC class I antigen Cw*12                                    | Membrane, Single-pass type I membrane protein                                                                                                                                                                                                                                                                                                                                       | 1                       |                 | HLA-C, HLAC                     |
| P30530                      |                        | 3                      | Tyrosine-protein kinase receptor UFO, AXL oncogene                                                                      | Membrane, Single-pass type I membrane protein                                                                                                                                                                                                                                                                                                                                       | 1                       |                 | AXL, UFO                        |
| P30685                      | 6                      | 3                      | HLA class I histocompatibility antigen, B-35 alpha chain, MHC class I antigen B*35                                      | Membrane, Single-pass type I membrane protein                                                                                                                                                                                                                                                                                                                                       | 1                       |                 | HLA-B, HLAB                     |
| P54289                      | 3                      | 1                      | Voltage-dependent calcium channel subunit alpha-2/delta-1, Voltage-gated calcium channel subunit alpha-2/delta-1        | Membrane, Single-pass type I membrane protein                                                                                                                                                                                                                                                                                                                                       | 1                       |                 | CACNA2D1, CACNL2A, CCHL2A, MHS3 |
| P78310                      | 5                      | 4                      | Coxsackievirus and adenovirus receptor, Coxsackievirus B-adenovirus receptor, HCVADR, hCAR, CVB3-binding protein        | Cell membrane, Single-pass type I membrane protein, Cell junction, Tight junction, Cell junction, Adherens junction, Basolateral cell membrane, Single-pass type I membrane protein, In epithelial cells localizes to the apical junction complex composed of tight and adherens junctions. In airway epithelial cells localized to basolateral membrane but not to apical surface. | 1                       |                 | CXADR, CAR                      |

## Unique in TPC-1

|        |    |    |                                                                                                                                                                                                                                                                                                                                                     |                                                    |   |        |                                              |
|--------|----|----|-----------------------------------------------------------------------------------------------------------------------------------------------------------------------------------------------------------------------------------------------------------------------------------------------------------------------------------------------------|----------------------------------------------------|---|--------|----------------------------------------------|
| P78324 | 15 | 20 | Tyrosine-protein phosphatase non-receptor type substrate 1, SHP substrate 1, SHPS-1, Inhibitory receptor SHPS-1, Signal regulatory protein alpha-1, Sirp-alpha-1, Sirp-alpha-2, Sirp-alpha-3, MyD-1 antigen, Brain Ig-like molecule with tyrosine-based activation motifs, Bit, Macrophage fusion receptor, p84, CD172 antigen-like family member A | Membrane, Single-pass type I membrane protein      | 1 | CD172a | SIRPA, BIT, MFR, MYD1, PTPNS1, SHPS1, SIRP   |
| Q12841 | 27 | 11 | Follistatin-related protein 1, Follistatin-like 1                                                                                                                                                                                                                                                                                                   | Secreted                                           | 0 |        | FSTL1, FRP                                   |
| Q7Z3B1 | 2  | 1  | Neuronal growth regulator 1                                                                                                                                                                                                                                                                                                                         | Cell membrane, Lipid-anchor, GPI-anchor            | 0 |        | NEGR1, UNQ2433/P, RO4993                     |
| Q8NBK3 | 13 | 5  | Sulfatase-modifying factor 1, C-alpha-formylglycine-generating enzyme 1                                                                                                                                                                                                                                                                             | Endoplasmic reticulum lumen                        | 0 |        | SUMF1, FGE, PSEC0152, UNQ3037/P, RO9852      |
| Q92484 | 4  | 20 | Acid sphingomyelinase-like phosphodiesterase 3a, ASM-like phosphodiesterase 3a                                                                                                                                                                                                                                                                      | Secreted                                           | 0 |        | SMPDL3A, ASML3A                              |
| Q92859 |    | 3  | Neogenin                                                                                                                                                                                                                                                                                                                                            | Cell membrane, Single-pass type I membrane protein | 1 |        | NEO1, NGN                                    |
| Q96D42 | 18 | 31 | Hepatitis A virus cellular receptor 1, HAVcr-1, T-cell immunoglobulin and mucin domain-containing protein 1, TIMD-1, T-cell membrane protein 1, TIM-1, TIM                                                                                                                                                                                          | Membrane, Single-pass type I membrane protein      | 1 |        | HAVCR1, TIM1, TIMD1                          |
| Q9HB40 | 6  | 18 | Retinoid-inducible serine carboxypeptidase, Serine carboxypeptidase 1                                                                                                                                                                                                                                                                               | Secreted                                           | 0 |        | SCPEP1, RISC, SCP1, MSTP034, UNQ265/PR, O302 |
| Q9UNN8 | 5  | 4  | Endothelial protein C receptor, Endothelial cell protein C receptor, Activated protein C receptor, APC receptor                                                                                                                                                                                                                                     | Membrane, Single-pass type I membrane protein      | 1 | CD201  | PROCR, EPCR                                  |



## Unique Proteins Identified in XTC-1 Cell Line

| Swiss-Prot Accession Number | XTC-p13 Spectra Counts | XTC-p29 Spectra Counts | Protein Name                                                                                                                                                                                                                                                  | Subcellular location                                                                                                                                                                                                                                                                                                                                                                                                                                                                                                                                                                           | #Trans-membrane regions | Cd Antigen Name | Gene Name           |
|-----------------------------|------------------------|------------------------|---------------------------------------------------------------------------------------------------------------------------------------------------------------------------------------------------------------------------------------------------------------|------------------------------------------------------------------------------------------------------------------------------------------------------------------------------------------------------------------------------------------------------------------------------------------------------------------------------------------------------------------------------------------------------------------------------------------------------------------------------------------------------------------------------------------------------------------------------------------------|-------------------------|-----------------|---------------------|
| O15118                      | 5                      | 1                      | Niemann-Pick C1 protein                                                                                                                                                                                                                                       | Late endosome membrane, Multi-pass membrane protein, Lysosome membrane, Multi-pass membrane protein                                                                                                                                                                                                                                                                                                                                                                                                                                                                                            | 11                      |                 | NPC1                |
| P04843                      | 2                      | 1                      | Dolichyl-diphosphooligosaccharide--protein glycosyltransferase subunit 1, Dolichyl-diphosphooligosaccharide--protein glycosyltransferase 67 kDa subunit, Ribophorin-1, Ribophorin I, RPN-I                                                                    | Endoplasmic reticulum membrane, Single-pass type I membrane protein, Melanosome, Identified by mass spectrometry in melanosome fractions from stage I to stage IV.                                                                                                                                                                                                                                                                                                                                                                                                                             | 1                       |                 | RPN1                |
| P05783                      | 46                     | 1                      | Keratin, type I cytoskeletal 18, Cytokeratin-18, CK-18, Keratin-18, K18, Cell proliferation-inducing gene 46 protein                                                                                                                                          | Cytoplasm, Perinuclear region                                                                                                                                                                                                                                                                                                                                                                                                                                                                                                                                                                  | 0                       |                 | KRT18, CYK18, PIG46 |
| P06276                      | 10                     | 54                     | Cholinesterase, Acylcholine acylhydrolase, Choline esterase II, Butyrylcholine esterase, Pseudocholinesterase                                                                                                                                                 |                                                                                                                                                                                                                                                                                                                                                                                                                                                                                                                                                                                                | 0                       |                 | BCHE, CHE1          |
| P08571                      | 43                     | 84                     | Monocyte differentiation antigen CD14, Myeloid cell-specific leucine-rich glycoprotein                                                                                                                                                                        | Cell membrane, Lipid-anchor, GPI-anchor                                                                                                                                                                                                                                                                                                                                                                                                                                                                                                                                                        | 0                       | CD14            | CD14                |
| P09603                      | 1                      | 10                     | Macrophage colony-stimulating factor 1, CSF-1, MCSF, M-CSF, Lanimostim                                                                                                                                                                                        | Cell membrane, Single-pass membrane protein, Secreted, Extracellular space                                                                                                                                                                                                                                                                                                                                                                                                                                                                                                                     | 1                       |                 | CSF1                |
| P0C0L5                      |                        | 26                     | Complement C4-B, Basic complement C4, C3 and PZP-like alpha-2-macroglobulin domain-containing protein 3                                                                                                                                                       | Secreted                                                                                                                                                                                                                                                                                                                                                                                                                                                                                                                                                                                       | 0                       |                 | C4B, CO4, CPAMD3    |
| P15941                      | 18                     | 20                     | Mucin-1, MUC-1, Polymorphic epithelial mucin, PEM, PEMT, Episialin, Tumor-associated mucin, Carcinoma-associated mucin, Tumor-associated epithelial membrane antigen, EMA, H23AG, Peanut-reactive urinary mucin, PUM, Breast carcinoma-associated antigen DF3 | Apical cell membrane, Single-pass type I membrane protein, Exclusively located in the apical domain of the plasma membrane of highly polarized epithelial cells. After endocytosis, internalized and recycled to the cell membrane. Located to microvilli and to the tips of long filopodial protusions., Secreted, Secreted, Secreted, Cell membrane, Cytoplasm, Nucleus, On EGF and PDGFRB stimulation, transported to the nucleus through interaction with CTNNB1, a process which is stimulated by phosphorylation. On HRG stimulation, colocalizes with JUP/gamma-catenin at the nucleus. | 1                       | CD227           | MUC1, PUM           |
| P31431                      |                        | 9                      | Syndecan-4, SYND4, Amphiglycan, Ryudocan core protein                                                                                                                                                                                                         | Membrane, Single-pass type I membrane protein                                                                                                                                                                                                                                                                                                                                                                                                                                                                                                                                                  | 1                       |                 | SDC4                |

|        |    |    |                                                                                                                                                                                                       |                                                                                                                                                                                                                                                                                                                                                                                                                                                                                                                                                                                                                                                           |   |       |                           |
|--------|----|----|-------------------------------------------------------------------------------------------------------------------------------------------------------------------------------------------------------|-----------------------------------------------------------------------------------------------------------------------------------------------------------------------------------------------------------------------------------------------------------------------------------------------------------------------------------------------------------------------------------------------------------------------------------------------------------------------------------------------------------------------------------------------------------------------------------------------------------------------------------------------------------|---|-------|---------------------------|
| P41222 | 14 | 26 | Prostaglandin-H2 D-isomerase, Lipocalin-type prostaglandin-D synthase, Glutathione-independent PGD synthetase, Prostaglandin-D2 synthase, PGD2 synthase, PGDS2, PGDS, Beta-trace protein, Cerebrin-28 | Rough endoplasmic reticulum, Nucleus membrane, Golgi apparatus, Cytoplasm, Perinuclear region, Secreted, Detected on rough endoplasmic reticulum of arachnoid and meningioma cells. Localized to the nuclear envelope, Golgi apparatus, secretory vesicles and spherical cytoplasmic structures in arachnoid trabecular cells, and to circular cytoplasmic structures in meningeal macrophages and perivascular microglial cells. In oligodendrocytes, localized to the rough endoplasmic reticulum and nuclear envelope. In retinal pigment epithelial cells, localized to distinct cytoplasmic domains including the perinuclear region. Also secreted. | 0 |       | PTGDS, PDS                |
| P48307 |    | 20 | Tissue factor pathway inhibitor 2, TFPI-2, Placental protein 5, PP5                                                                                                                                   | Secreted                                                                                                                                                                                                                                                                                                                                                                                                                                                                                                                                                                                                                                                  | 0 |       | TFPI2                     |
| P55285 |    | 5  | Cadherin-6, Kidney cadherin, K-cadherin                                                                                                                                                               | Cell membrane, Single-pass type I membrane protein                                                                                                                                                                                                                                                                                                                                                                                                                                                                                                                                                                                                        | 1 |       | CDH6                      |
| P61769 | 6  | 9  | Beta-2-microglobulin                                                                                                                                                                                  | Secreted                                                                                                                                                                                                                                                                                                                                                                                                                                                                                                                                                                                                                                                  | 0 |       | B2M, CDABP009 2, HDCMA22P |
| Q02083 | 6  | 8  | N-acylethanolamine-hydrolyzing acid amidase, N-acylsphingosine amidohydrolase-like, ASAH-like protein, Acid ceramidase-like protein                                                                   | Lysosome                                                                                                                                                                                                                                                                                                                                                                                                                                                                                                                                                                                                                                                  | 0 |       | NAAA, ASAHL, PLT          |
| Q02388 |    | 10 | Collagen alpha-1(VII) chain, Long-chain collagen, LC collagen                                                                                                                                         | Secreted, Extracellular space, Extracellular matrix, Basement membrane                                                                                                                                                                                                                                                                                                                                                                                                                                                                                                                                                                                    | 0 |       | COL7A1                    |
| Q05707 |    | 18 | Collagen alpha-1(XIV) chain, Undulin                                                                                                                                                                  | Secreted, Extracellular space, Extracellular matrix                                                                                                                                                                                                                                                                                                                                                                                                                                                                                                                                                                                                       | 0 |       | COL14A1, UND              |
| Q10588 | 3  | 28 | ADP-ribosyl cyclase 2, Cyclic ADP-ribose hydrolase 2, cADPr hydrolase 2, Bone marrow stromal antigen 1, BST-1                                                                                         | Cell membrane, Lipid-anchor, GPI-anchor                                                                                                                                                                                                                                                                                                                                                                                                                                                                                                                                                                                                                   | 0 | CD157 | BST1                      |
| Q10589 | 3  | 11 | Bone marrow stromal antigen 2, BST-2, HM1.24 antigen                                                                                                                                                  | Golgi apparatus, trans-Golgi network, Cell membrane, Single-pass type II membrane protein, Cell membrane, Lipid-anchor, GPI-anchor                                                                                                                                                                                                                                                                                                                                                                                                                                                                                                                        | 1 | CD317 | BST2                      |
| Q12805 |    | 45 | EGF-containing fibulin-like extracellular matrix protein 1, Fibulin-3, FIBL-3, Fibrillin-like protein, Extracellular protein S1-5                                                                     | Secreted                                                                                                                                                                                                                                                                                                                                                                                                                                                                                                                                                                                                                                                  | 0 |       | EFEMP1, FBLN3, FBNL       |

Unique in XTC-1

|        |    |    |                                                                                                                                                                                |                                                                                                                                                                   |    |                                     |
|--------|----|----|--------------------------------------------------------------------------------------------------------------------------------------------------------------------------------|-------------------------------------------------------------------------------------------------------------------------------------------------------------------|----|-------------------------------------|
| Q14508 | 17 | 40 | WAP four-disulfide core domain protein 2, Major epididymis-specific protein E4, Epididymal secretory protein E4, Putative protease inhibitor WAP5                              | Secreted                                                                                                                                                          | 0  | WFDC2, HE4, WAP5                    |
| Q8IWA5 | 10 | 10 | Choline transporter-like protein 2, Solute carrier family 44 member 2                                                                                                          | Membrane, Multi-pass membrane protein                                                                                                                             | 10 | SLC44A2, CTL2, PSEC0210             |
| Q8IZP9 | 6  | 14 | G-protein coupled receptor 64, Epididymis-specific protein 6, He6 receptor                                                                                                     | Cell membrane, Multi-pass membrane protein                                                                                                                        | 7  | GPR64, HE6, TM7LN2                  |
| Q8NFJ5 | 13 | 3  | Retinoic acid-induced protein 3, G-protein coupled receptor family C group 5 member A, Retinoic acid-induced gene 1 protein, RAIG-1, Orphan G-protein-coupling receptor PEIG-1 | Cell membrane, Multi-pass membrane protein, Cytoplasmic vesicle membrane, Multi-pass membrane protein, Localized in the plasma membrane and perinuclear vesicles. | 7  | GPRC5A, GPCR5A, RAI3, RAIG1         |
| Q8TCT9 |    | 29 | Minor histocompatibility antigen H13, Signal peptide peptidase, Presenilin-like protein 3, hIMP1 protein                                                                       | Endoplasmic reticulum membrane, Multi pass membrane protein                                                                                                       | 7  | HM13, H13, IMP1, PSL3, SPP, MSTP086 |
| Q92823 |    | 7  | Neuronal cell adhesion molecule, Nr-CAM, NgCAM-related cell adhesion molecule, Ng-CAM-related, hBravo                                                                          | Cell membrane, Single-pass type I membrane protein                                                                                                                | 1  | NRCAM, KIAA0343                     |
| Q9UMF0 | 2  | 15 | Intercellular adhesion molecule 5, ICAM-5, Telencephalin                                                                                                                       | Membrane, Single-pass type I membrane protein                                                                                                                     | 1  | ICAM5, TLCN, TLN                    |

Unique Proteins Identified in ARO Cell Line

| Swiss-Prot Accession Number | ARO-p65 Spectra Counts | ARO-p67 Spectra Counts | Protein Name                                                                                                                                                                                      | Subcellular location                                                                                                                                                                                                                        | #Transmembrane regions | Cd Antigen Name | Gene Name                                         |
|-----------------------------|------------------------|------------------------|---------------------------------------------------------------------------------------------------------------------------------------------------------------------------------------------------|---------------------------------------------------------------------------------------------------------------------------------------------------------------------------------------------------------------------------------------------|------------------------|-----------------|---------------------------------------------------|
| P02649                      | 4                      | 7                      | Apolipoprotein E, Apo-E                                                                                                                                                                           | Secreted                                                                                                                                                                                                                                    | 0                      |                 | APOE                                              |
| P98160                      | 7                      | 5                      | Basement membrane-specific heparan sulfate proteoglycan core protein, HSPG, Perlecan, PLC                                                                                                         | Secreted, Extracellular space, Extracellular matrix, Basement membrane                                                                                                                                                                      | 0                      |                 | HSPG2                                             |
| Q16790                      | 6                      | 32                     | Carbonic anhydrase 9, Carbonic anhydrase IX, CA-IX, CAIX, Carbonate dehydratase IX, Membrane antigen MN, P54/58N, Renal cell carcinoma-associated antigen G250, RCC-associated antigen G250, pMW1 | Nucleus, Nucleus, Nucleolus, Cell membrane, Single-pass type I membrane protein, Cell projection, Microvillus membrane, Single-pass type I membrane protein, Found on the surface microvilli and in the nucleus, particularly in nucleolus. | 1                      |                 | CA9, G250, MN                                     |
| P27701                      | 2                      |                        | CD82 antigen, Inducible membrane protein R2, C33 antigen, IA4, Metastasis suppressor Kangai 1, Suppressor of tumorigenicity-6, Tetraspanin-27, Tspan-27                                           | Membrane, Multi-pass membrane protein                                                                                                                                                                                                       | 4                      | CD82            | CD82, KAI1, SAR2, ST6, TSPAN27                    |
| Q02487                      |                        | 7                      | Desmocollin-2, Desmosomal glycoprotein II and III, Desmocollin-3                                                                                                                                  | Cell membrane, Single-pass type I membrane protein, Cell junction, Desmosome                                                                                                                                                                | 1                      |                 | DSC2, CDHF2, DSC3                                 |
| O94907                      |                        | 7                      | Dickkopf-related protein 1, Dickkopf-1, Dkk-1, hDkk-1, SK                                                                                                                                         | Secreted                                                                                                                                                                                                                                    | 0                      |                 | DKK1, UNQ492/PRO1008                              |
| P54753                      | 2                      | 14                     | Ephrin type-B receptor 3, Tyrosine-protein kinase receptor HEK-2, Tyrosine-protein kinase TYRO6                                                                                                   | Membrane, Single-pass type I membrane protein                                                                                                                                                                                               | 1                      |                 | EPHB3, ETK2, HEK2, TYRO6                          |
| P98172                      | 4                      | 20                     | Ephrin-B1, EPH-related receptor tyrosine kinase ligand 2, LERK-2, ELK ligand, ELK-L                                                                                                               | Membrane, Single-pass type I membrane protein                                                                                                                                                                                               | 1                      |                 | EFNB1, EFL3, EPLG2, LERK2                         |
| P52799                      | 2                      | 9                      | Ephrin-B2, EPH-related receptor tyrosine kinase ligand 5, LERK-5, HTK ligand, HTK-L                                                                                                               | Membrane, Single-pass type I membrane protein                                                                                                                                                                                               | 1                      |                 | BTD                                               |
| Q8NBJ4                      | 4                      | 6                      | Golgi membrane protein 1, Golgi phosphoprotein 2, Golgi membrane protein GP73                                                                                                                     | Golgi apparatus, cis-Golgi network membrane, Single-pass type II membrane protein, Early Golgi. Cycles via the cell surface and endosomes upon luminal pH disruption.                                                                       | 1                      |                 | GOLM1, C9orf155, GOLPH2, PSEC0242, UNQ686/PRO1326 |

Unique in ARO

|        |    |    |                                                                                                                                                                                                                                                     |                                                                                                                                                                                                                                                                                                                                                                                    |   |       |                                         |
|--------|----|----|-----------------------------------------------------------------------------------------------------------------------------------------------------------------------------------------------------------------------------------------------------|------------------------------------------------------------------------------------------------------------------------------------------------------------------------------------------------------------------------------------------------------------------------------------------------------------------------------------------------------------------------------------|---|-------|-----------------------------------------|
| Q9Y251 | 2  | 7  | Heparanase, Heparanase-1, Hpa1, Endo-glucuronidase                                                                                                                                                                                                  | Lysosome membrane, Peripheral membrane protein, Secreted, Secreted, internalised and transferred to late endosomes/lysosomes as a proheparanase. In lysosomes, it is processed into the active form, the heparanase. The uptake or internalisation of proheparanase is mediated by HSPGs. Heparin appears to be a competitor and retain proheparanase in the extracellular medium. | 0 |       | HPSE, HEP, HPA, HPA1, HPR1, HPSE1, HSE1 |
| P23229 | 10 | 6  | Integrin alpha-6, VLA-6, CD49 antigen-like family member F                                                                                                                                                                                          | Membrane, Single-pass type I membrane protein                                                                                                                                                                                                                                                                                                                                      | 1 | CD49f | ITGA6                                   |
| O43278 | 10 | 23 | Kunitz-type protease inhibitor 1, Hepatocyte growth factor activator inhibitor type 1, HAI-1                                                                                                                                                        | Secreted                                                                                                                                                                                                                                                                                                                                                                           | 0 |       | SPINT1, HAI1, UNQ223/PRO256             |
| Q16787 | 24 | 12 | Laminin subunit alpha-3, Epiligrin 170 kDa subunit, E170, Nicein subunit alpha                                                                                                                                                                      | Secreted, Extracellular space, Extracellular matrix, Basement membrane, Major component.                                                                                                                                                                                                                                                                                           | 0 |       | LAMA3, LAMNA                            |
| Q13753 | 6  | 4  | Laminin subunit gamma-2, Laminin 5 gamma 2 subunit, Kalinin/nicein/epiligrin 100 kDa subunit, Laminin B2t chain, Cell-scattering factor 140 kDa subunit, CSF 140 kDa subunit, Large adhesive scatter factor 140 kDa subunit, Ladsin 140 kDa subunit | Secreted, Extracellular space, Extracellular matrix, Basement membrane, Major component.                                                                                                                                                                                                                                                                                           | 0 |       | LAMC2, LAMB2T, LAMNB2                   |
| P02750 | 1  | 2  | Leucine-rich alpha-2-glycoprotein, LRG                                                                                                                                                                                                              | Secreted                                                                                                                                                                                                                                                                                                                                                                           | 0 |       | LRG1, LRG                               |
| Q08722 | 12 | 1  | Leukocyte surface antigen CD47, Integrin-associated protein, IAP, Antigenic surface determinant protein OA3, Protein MER6                                                                                                                           | Cell membrane, Multi-pass membrane protein                                                                                                                                                                                                                                                                                                                                         | 5 | CD47  | CD47, MER6                              |
| Q04721 | 1  | 4  | Neurogenic locus notch homolog protein 2, Notch 2, hN2                                                                                                                                                                                              | Cell membrane, Single-pass type I membrane protein, Nucleus, Following proteolytical processing NICD is translocated to the nucleus.                                                                                                                                                                                                                                               | 1 |       | NOTCH2                                  |
| P37198 |    | 7  | Nuclear pore glycoprotein p62, 62 kDa nucleoporin                                                                                                                                                                                                   | Nucleus, Nuclear pore complex, Central region of the nuclear pore, within the transporter. During mitotic cell division, it associates with the poles of the mitotic spindle.                                                                                                                                                                                                      | 0 |       | NUP62                                   |
| O00592 | 1  |    | Podocalyxin-like protein 1                                                                                                                                                                                                                          | Membrane, Single-pass type I membrane protein                                                                                                                                                                                                                                                                                                                                      | 1 |       | PODXL, PCLP, PCLP1                      |
| Q15223 | 1  | 5  | Poliovirus receptor-related protein 1, Herpes virus entry mediator C, HveC, Nectin-1, Herpesvirus Ig-like receptor, HlgR                                                                                                                            | Cell membrane, Single-pass type I membrane protein, Cell membrane, Single-pass type I membrane protein, Secreted                                                                                                                                                                                                                                                                   | 1 | CD111 | PVRL1, HVEC, PRR1                       |

Unique in ARO

|        |   |   |                                                                                                                                    |                                                                                                                                                                                                                                                                                                                                                                                                                                                                                                                                                                                                                                                                                                                                                                                                                         |    |       |                                         |
|--------|---|---|------------------------------------------------------------------------------------------------------------------------------------|-------------------------------------------------------------------------------------------------------------------------------------------------------------------------------------------------------------------------------------------------------------------------------------------------------------------------------------------------------------------------------------------------------------------------------------------------------------------------------------------------------------------------------------------------------------------------------------------------------------------------------------------------------------------------------------------------------------------------------------------------------------------------------------------------------------------------|----|-------|-----------------------------------------|
| O43490 | 3 | 3 | Prominin-1, Prominin-like protein 1, Antigen AC133                                                                                 | Apical cell membrane, Multi-pass membrane protein, Cell projection, Microvillus membrane, Multi-pass membrane protein                                                                                                                                                                                                                                                                                                                                                                                                                                                                                                                                                                                                                                                                                                   | 5  | CD133 | PROM1, PROML1                           |
| P10586 |   | 2 | Receptor-type tyrosine-protein phosphatase F, LAR protein, Leukocyte antigen related                                               | Membrane, Single-pass type I membrane protein                                                                                                                                                                                                                                                                                                                                                                                                                                                                                                                                                                                                                                                                                                                                                                           | 1  |       | PTPRF, LAR                              |
| Q9NPR2 |   | 3 | Semaphorin-4B                                                                                                                      | Membrane, Single-pass type I membrane protein                                                                                                                                                                                                                                                                                                                                                                                                                                                                                                                                                                                                                                                                                                                                                                           | 1  |       | SEMA4B, KIAA1745, SEMAC, UNQ749/PRO1480 |
| P55011 | 3 | 4 | Solute carrier family 12 member 2, Bumetanide-sensitive sodium-(potassium)-chloride cotransporter 1, Basolateral Na-K-Cl symporter | Membrane, Multi-pass membrane protein                                                                                                                                                                                                                                                                                                                                                                                                                                                                                                                                                                                                                                                                                                                                                                                   | 12 |       |                                         |
| Q99523 |   | 3 | Sortilin, Neurotensin receptor 3, NTR3, NT3, Glycoprotein 95, Gp95, 100 kDa NT receptor                                            | Membrane, Single-pass type I membrane protein, Endoplasmic reticulum membrane, Single-pass type I membrane protein, Endosome membrane, Single-pass type I membrane protein, Golgi apparatus, Golgi stack membrane, Single-pass type I membrane protein, Lysosome membrane, Single-pass type I membrane protein, Nucleus membrane, Single-pass type I membrane protein, Cell membrane, Single-pass type I membrane protein, Lysosome membrane, Single-pass type I membrane protein, Localized to membranes of the endoplasmic reticulum, endosomes, Golgi stack, lysosomes and nucleus. A small fraction of the protein is also localized to the plasma membrane. May also be found in SLC2A4/GLUT4 storage vesicles (GSVs) in adipocytes. Localization to the plasma membrane in adipocytes may be enhanced by insulin. | 1  |       | SORT1                                   |
| O60635 | 5 |   | Tetraspanin-1, Tspan-1, Tetraspan NET-1, Tetraspanin TM4-C                                                                         | Membrane, Multi-pass membrane protein                                                                                                                                                                                                                                                                                                                                                                                                                                                                                                                                                                                                                                                                                                                                                                                   | 4  |       | TSPAN1                                  |
| O95858 | 5 |   | Tetraspanin-15, Tspan-15, Transmembrane 4 superfamily member 15, Tetraspan NET-7                                                   | Membrane, Multi-pass membrane protein                                                                                                                                                                                                                                                                                                                                                                                                                                                                                                                                                                                                                                                                                                                                                                                   | 4  |       | TSPAN15, NET7, TM4SF15, UNQ677/PRO1311  |

Unique in ARO

|        |    |    |                                                                                                                                                                                                                                                                |                                                                                                                                                              |   |       |                                            |
|--------|----|----|----------------------------------------------------------------------------------------------------------------------------------------------------------------------------------------------------------------------------------------------------------------|--------------------------------------------------------------------------------------------------------------------------------------------------------------|---|-------|--------------------------------------------|
| O60637 | 6  |    | Tetraspanin-3, Tspan-3, Transmembrane 4 superfamily member 8, Tetraspanin TM4-A                                                                                                                                                                                | Membrane, Multi-pass membrane protein                                                                                                                        | 4 |       | TSPAN3, TM4SF8                             |
| P19075 | 66 | 40 | Tetraspanin-8, Tspan-8, Transmembrane 4 superfamily member 3, Tumor-associated antigen CO-029                                                                                                                                                                  | Membrane, Multi-pass membrane protein                                                                                                                        | 4 |       | TSPAN8, TM4SF3                             |
| P10646 | 4  | 4  | Tissue factor pathway inhibitor, TFPI, Lipoprotein-associated coagulation inhibitor, LACI, Extrinsic pathway inhibitor, EPI                                                                                                                                    | Secreted                                                                                                                                                     | 0 |       | TFPI, LACI, TFPI1                          |
| P02786 |    | 7  | Transferrin receptor protein 1, TfR1, TfR, TR, Trfr, T9, p90                                                                                                                                                                                                   | Cell membrane, Single-pass type II membrane protein, Melanosome, Identified by mass spectrometry in melanosome fractions from stage I to stage IV., Secreted | 1 | CD71  | TFRC                                       |
| P16422 | 68 | 97 | Tumor-associated calcium signal transducer 1, Major gastrointestinal tumor-associated protein GA733-2, Epithelial cell surface antigen, Epithelial glycoprotein, EGP, Adenocarcinoma-associated antigen, KSA, KS 1/4 antigen, Cell surface glycoprotein Trop-1 | Membrane, Single-pass type I membrane protein                                                                                                                | 1 | CD326 | TACSTD1, GA733-2, M1S2, M4S1, MIC18, TROP1 |
| P02774 |    | 11 | Vitamin D-binding protein, DBP, VDB, Group-specific component, Gc-globulin                                                                                                                                                                                     | Secreted                                                                                                                                                     | 0 |       | GC                                         |

## Unique Proteins Identified in DRO-1 Cell Line

| Swiss-Prot Accession Number | DRO-p54 Spectra Counts | DRO-p56 Spectra Counts | Protein Name                                                                                                                                               | Subcellular location                                                                                                                                                                                                            | #Trans-membrane regions | Cd Antigen Name | Gene Name                    |
|-----------------------------|------------------------|------------------------|------------------------------------------------------------------------------------------------------------------------------------------------------------|---------------------------------------------------------------------------------------------------------------------------------------------------------------------------------------------------------------------------------|-------------------------|-----------------|------------------------------|
| O60568                      | 39                     | 88                     | Procollagen-lysine,2-oxoglutarate 5-dioxygenase 3, Lysyl hydroxylase 3, LH3                                                                                | Rough endoplasmic reticulum membrane, Peripheral membrane protein                                                                                                                                                               | 0                       |                 | PLOD3                        |
| O95857                      | 1                      |                        | Tetraspanin-13, Tspan-13, Transmembrane 4 superfamily member 13, Tetraspan NET-6                                                                           | Membrane, Multi-pass membrane protein                                                                                                                                                                                           | 4                       |                 | O95857                       |
| P00750                      | 11                     |                        | Tissue-type plasminogen activator, t-plasminogen activator, t-PA, tPA                                                                                      | Secreted, Extracellular space                                                                                                                                                                                                   | 0                       |                 | PLAT                         |
| P02787                      | 273                    | 56                     | Serotransferrin, Transferrin, Siderophilin, Beta-1-metal-binding globulin                                                                                  | Secreted                                                                                                                                                                                                                        | 0                       |                 | TF, PRO1400                  |
| P05090                      | 5                      |                        | Apolipoprotein D, Apo-D, ApoD                                                                                                                              | Secreted                                                                                                                                                                                                                        | 0                       |                 | APOD                         |
| P05154                      | 2                      |                        | Plasma serine protease inhibitor, Serpin A5, Protein C inhibitor, PCI, Plasminogen activator inhibitor 3, PAI-3, PAI3, Acrosomal serine protease inhibitor | Secreted                                                                                                                                                                                                                        | 0                       |                 | SERPINA5, PCI, PLANH3, PROCI |
| P07093                      | 9                      | 10                     | Glia-derived nexin, GDN, Protease nexin I, PN-1, Protease inhibitor 7                                                                                      | Secreted, Extracellular space                                                                                                                                                                                                   | 0                       |                 | SERPINE2, PI7, PN1           |
| P08294                      | 54                     | 30                     | Extracellular superoxide dismutase [Cu-Zn], EC-SOD                                                                                                         | Secreted, Extracellular space, 99% of EC-SOD is anchored to heparan sulfate proteoglycans in the tissue interstitium, and 1% is located in the vasculature in equilibrium between the plasma and the endothelium.               | 0                       |                 | SOD3                         |
| P10915                      | 153                    | 20                     | Hyaluronan and proteoglycan link protein 1, Proteoglycan link protein, Cartilage link protein, LP                                                          | Secreted, Extracellular space, Extracellular matrix                                                                                                                                                                             | 0                       |                 | HAPLN1, CRTL1                |
| P16112                      | 34                     | 20                     | Aggrecan core protein, Cartilage-specific proteoglycan core protein, CSPCP, Chondroitin sulfate proteoglycan core protein 1                                | Secreted, Extracellular space, Extracellular matrix                                                                                                                                                                             | 0                       |                 | ACAN, AGC1, CSPG1, MSK16     |
| P30464                      | 8                      |                        | HLA class I histocompatibility antigen, B-15 alpha chain, MHC class I antigen B*15                                                                         | Membrane, Single-pass type I membrane protein                                                                                                                                                                                   | 1                       |                 | HLA-B, HLAB                  |
| Q12907                      |                        | 4                      | Vesicular integral-membrane protein VIP36, Lectin mannose-binding 2, Glycoprotein GP36b                                                                    | Endoplasmic reticulum-Golgi intermediate compartment membrane, Single-pass type I membrane protein, Golgi apparatus membrane, Single-pass membrane protein, Endoplasmic reticulum membrane, Single-pass type I membrane protein | 1                       |                 | LMAN2, C5orf8                |



Unique in DRO

|        |    |    |                                                                                                                              |                                                                                                                                                           |   |  |                                   |
|--------|----|----|------------------------------------------------------------------------------------------------------------------------------|-----------------------------------------------------------------------------------------------------------------------------------------------------------|---|--|-----------------------------------|
| Q86YB8 | 22 | 24 | ERO1-like protein beta, ERO1-Lbeta, Oxidoreductin-1-Lbeta, Endoplasmic oxidoreductin-1-like protein B                        | Endoplasmic reticulum membrane, Peripheral membrane protein, The association with TXNDC4 may be essential for its retention in the endoplasmic reticulum. | 0 |  | ERO1LB                            |
| Q8N474 | 21 | 2  | Secreted frizzled-related protein 1, sFRP-1, Frizzled-related protein 1, FRP-1, Secreted apoptosis-related protein 2, SARP-2 | Secreted, Cell membrane or extracellular matrix-associated. Released by heparin-binding.                                                                  | 0 |  | SFRP1, FRP, FRP1, SARP2           |
| Q96CG8 | 30 | 36 | Collagen triple helix repeat-containing protein 1, NMTC1 protein                                                             | Secreted, Extracellular space, Extracellular matrix                                                                                                       | 0 |  | CTHRC1, UNQ762/PRO1550            |
| Q96JB6 | 12 |    | Lysyl oxidase homolog 4, Lysyl oxidase-like protein 4, Lysyl oxidase-related protein C                                       | Secreted, Extracellular space                                                                                                                             | 0 |  | LOXL4, LOXC                       |
| Q9NPH3 | 8  |    | Interleukin-1 receptor accessory protein, IL-1 receptor accessory protein, IL-1RAcP                                          | Cell membrane, Single-pass type I membrane protein, Secreted, Secreted, Secreted                                                                          | 1 |  | IL1RAP                            |
| Q9Y2G5 | 9  | 35 | GDP-fucose protein O-fucosyltransferase 2, Peptide-O-fucosyltransferase 2, O-FucT-2                                          | Endoplasmic reticulum                                                                                                                                     | 0 |  | POFUT2, C21orf80, FUT13, KIAA0958 |
| Q9Y6C2 | 23 | 79 | EMILIN-1, Elastin microfibril interface-located protein 1, Elastin microfibril interfacier 1                                 | Secreted, Extracellular space, Extracellular matrix, Found mainly at the interface between amorphous elastin and microfibrils.                            | 0 |  | EMILIN1, EMI                      |
